# Supplementary material for: Multi-View Radiomics Feature Fusion Reveals Distinct Immuno-Oncological Characteristics and Clinical Prognoses in Hepatocellular Carcinoma
Source: Cancers (Basel). 2023 Apr 17;15(8):2338. doi: 10.3390/cancers15082338 (PMC10137067; doi:10.3390/cancers15082338)
Supplement: Supplementary file 1 [file cancers-15-02338-s001.zip]

Archive with 9 entries (9 files):
- Supplymentary Figures.pdf
- Table S1.xlsx
- Table S2.xlsx
- Table S3.xlsx
- Table S4.xlsx
- Table S5.xlsx
- Table S6.xlsx
- Table S7.xlsx
- Table S8.xlsx
