# Supplementary material for: Multi-View Radiomics Feature Fusion Reveals Distinct Immuno-Oncological Characteristics and Clinical Prognoses in Hepatocellular Carcinoma
Source: Cancers (Basel). 2023 Apr 17;15(8):2338. doi: 10.3390/cancers15082338 (PMC10137067; doi:10.3390/cancers15082338)
Supplement: Supplementary file 1 [file cancers-15-02338-s001.zip › Table S1.xlsx]

## Sheet: radiomics features information
Phase	Region	Feature classes	Feature names
Artery	Tumor	Shape	Elongation
Artery	Tumor	Shape	Flatness
Artery	Tumor	Shape	Leastaxislength
Artery	Tumor	Shape	Majoraxislength
Artery	Tumor	Shape	Maximum2ddiametercolumn
Artery	Tumor	Shape	Maximum2ddiameterrow
Artery	Tumor	Shape	Maximum2ddiameterslice
Artery	Tumor	Shape	Maximum3ddiameter
Artery	Tumor	Shape	Meshvolume
Artery	Tumor	Shape	Minoraxislength
Artery	Tumor	Shape	Sphericity
Artery	Tumor	Shape	Surfacearea
Artery	Tumor	Shape	Surfacevolumeratio
Artery	Tumor	Shape	Voxelvolume
Artery	Tumor	Firstorder	10percentile
Artery	Tumor	Firstorder	90percentile
Artery	Tumor	Firstorder	Energy
Artery	Tumor	Firstorder	Entropy
Artery	Tumor	Firstorder	Interquartilerange
Artery	Tumor	Firstorder	Kurtosis
Artery	Tumor	Firstorder	Maximum
Artery	Tumor	Firstorder	Meanabsolutedeviation
Artery	Tumor	Firstorder	Mean
Artery	Tumor	Firstorder	Median
Artery	Tumor	Firstorder	Minimum
Artery	Tumor	Firstorder	Range
Artery	Tumor	Firstorder	Robustmeanabsolutedeviation
Artery	Tumor	Firstorder	Rootmeansquared
Artery	Tumor	Firstorder	Skewness
Artery	Tumor	Firstorder	Totalenergy
Artery	Tumor	Firstorder	Uniformity
Artery	Tumor	Firstorder	Variance
Artery	Tumor	Glcm	Autocorrelation
Artery	Tumor	Glcm	Jointaverage
Artery	Tumor	Glcm	Clusterprominence
Artery	Tumor	Glcm	Clustershade
Artery	Tumor	Glcm	Clustertendency
Artery	Tumor	Glcm	Contrast
Artery	Tumor	Glcm	Correlation
Artery	Tumor	Glcm	Differenceaverage
Artery	Tumor	Glcm	Differenceentropy
Artery	Tumor	Glcm	Differencevariance
Artery	Tumor	Glcm	Jointenergy
Artery	Tumor	Glcm	Jointentropy
Artery	Tumor	Glcm	Imc1
Artery	Tumor	Glcm	Imc2
Artery	Tumor	Glcm	Idm
Artery	Tumor	Glcm	Idmn
Artery	Tumor	Glcm	Id
Artery	Tumor	Glcm	Idn
Artery	Tumor	Glcm	Inversevariance
Artery	Tumor	Glcm	Maximumprobability
Artery	Tumor	Glcm	Sumentropy
Artery	Tumor	Glcm	Sumsquares
Artery	Tumor	Glrlm	Graylevelnonuniformity
Artery	Tumor	Glrlm	Graylevelnonuniformitynormalized
Artery	Tumor	Glrlm	Graylevelvariance
Artery	Tumor	Glrlm	Highgraylevelrunemphasis
Artery	Tumor	Glrlm	Longrunemphasis
Artery	Tumor	Glrlm	Longrunhighgraylevelemphasis
Artery	Tumor	Glrlm	Longrunlowgraylevelemphasis
Artery	Tumor	Glrlm	Lowgraylevelrunemphasis
Artery	Tumor	Glrlm	Runentropy
Artery	Tumor	Glrlm	Runlengthnonuniformity
Artery	Tumor	Glrlm	Runlengthnonuniformitynormalized
Artery	Tumor	Glrlm	Runpercentage
Artery	Tumor	Glrlm	Runvariance
Artery	Tumor	Glrlm	Shortrunemphasis
Artery	Tumor	Glrlm	Shortrunhighgraylevelemphasis
Artery	Tumor	Glrlm	Shortrunlowgraylevelemphasis
Artery	Tumor	Glszm	Graylevelnonuniformity
Artery	Tumor	Glszm	Graylevelnonuniformitynormalized
Artery	Tumor	Glszm	Graylevelvariance
Artery	Tumor	Glszm	Highgraylevelzoneemphasis
Artery	Tumor	Glszm	Largeareaemphasis
Artery	Tumor	Glszm	Largeareahighgraylevelemphasis
Artery	Tumor	Glszm	Largearealowgraylevelemphasis
Artery	Tumor	Glszm	Lowgraylevelzoneemphasis
Artery	Tumor	Glszm	Sizezonenonuniformity
Artery	Tumor	Glszm	Sizezonenonuniformitynormalized
Artery	Tumor	Glszm	Smallareaemphasis
Artery	Tumor	Glszm	Smallareahighgraylevelemphasis
Artery	Tumor	Glszm	Smallarealowgraylevelemphasis
Artery	Tumor	Glszm	Zoneentropy
Artery	Tumor	Glszm	Zonepercentage
Artery	Tumor	Glszm	Zonevariance
Artery	Tumor	Gldm	Dependenceentropy
Artery	Tumor	Gldm	Dependencenonuniformity
Artery	Tumor	Gldm	Dependencenonuniformitynormalized
Artery	Tumor	Gldm	Dependencevariance
Artery	Tumor	Gldm	Graylevelnonuniformity
Artery	Tumor	Gldm	Graylevelvariance
Artery	Tumor	Gldm	Highgraylevelemphasis
Artery	Tumor	Gldm	Largedependenceemphasis
Artery	Tumor	Gldm	Largedependencehighgraylevelemphasis
Artery	Tumor	Gldm	Largedependencelowgraylevelemphasis
Artery	Tumor	Gldm	Lowgraylevelemphasis
Artery	Tumor	Gldm	Smalldependenceemphasis
Artery	Tumor	Gldm	Smalldependencehighgraylevelemphasis
Artery	Tumor	Gldm	Smalldependencelowgraylevelemphasis
Venous	Tumor	Shape	Elongation
Venous	Tumor	Shape	Flatness
Venous	Tumor	Shape	Leastaxislength
Venous	Tumor	Shape	Majoraxislength
Venous	Tumor	Shape	Maximum2ddiametercolumn
Venous	Tumor	Shape	Maximum2ddiameterrow
Venous	Tumor	Shape	Maximum2ddiameterslice
Venous	Tumor	Shape	Maximum3ddiameter
Venous	Tumor	Shape	Meshvolume
Venous	Tumor	Shape	Minoraxislength
Venous	Tumor	Shape	Sphericity
Venous	Tumor	Shape	Surfacearea
Venous	Tumor	Shape	Surfacevolumeratio
Venous	Tumor	Shape	Voxelvolume
Venous	Tumor	Firstorder	10percentile
Venous	Tumor	Firstorder	90percentile
Venous	Tumor	Firstorder	Energy
Venous	Tumor	Firstorder	Entropy
Venous	Tumor	Firstorder	Interquartilerange
Venous	Tumor	Firstorder	Kurtosis
Venous	Tumor	Firstorder	Maximum
Venous	Tumor	Firstorder	Meanabsolutedeviation
Venous	Tumor	Firstorder	Mean
Venous	Tumor	Firstorder	Median
Venous	Tumor	Firstorder	Minimum
Venous	Tumor	Firstorder	Range
Venous	Tumor	Firstorder	Robustmeanabsolutedeviation
Venous	Tumor	Firstorder	Rootmeansquared
Venous	Tumor	Firstorder	Skewness
Venous	Tumor	Firstorder	Totalenergy
Venous	Tumor	Firstorder	Uniformity
Venous	Tumor	Firstorder	Variance
Venous	Tumor	Glcm	Autocorrelation
Venous	Tumor	Glcm	Jointaverage
Venous	Tumor	Glcm	Clusterprominence
Venous	Tumor	Glcm	Clustershade
Venous	Tumor	Glcm	Clustertendency
Venous	Tumor	Glcm	Contrast
Venous	Tumor	Glcm	Correlation
Venous	Tumor	Glcm	Differenceaverage
Venous	Tumor	Glcm	Differenceentropy
Venous	Tumor	Glcm	Differencevariance
Venous	Tumor	Glcm	Jointenergy
Venous	Tumor	Glcm	Jointentropy
Venous	Tumor	Glcm	Imc1
Venous	Tumor	Glcm	Imc2
Venous	Tumor	Glcm	Idm
Venous	Tumor	Glcm	Idmn
Venous	Tumor	Glcm	Id
Venous	Tumor	Glcm	Idn
Venous	Tumor	Glcm	Inversevariance
Venous	Tumor	Glcm	Maximumprobability
Venous	Tumor	Glcm	Sumentropy
Venous	Tumor	Glcm	Sumsquares
Venous	Tumor	Glrlm	Graylevelnonuniformity
Venous	Tumor	Glrlm	Graylevelnonuniformitynormalized
Venous	Tumor	Glrlm	Graylevelvariance
Venous	Tumor	Glrlm	Highgraylevelrunemphasis
Venous	Tumor	Glrlm	Longrunemphasis
Venous	Tumor	Glrlm	Longrunhighgraylevelemphasis
Venous	Tumor	Glrlm	Longrunlowgraylevelemphasis
Venous	Tumor	Glrlm	Lowgraylevelrunemphasis
Venous	Tumor	Glrlm	Runentropy
Venous	Tumor	Glrlm	Runlengthnonuniformity
Venous	Tumor	Glrlm	Runlengthnonuniformitynormalized
Venous	Tumor	Glrlm	Runpercentage
Venous	Tumor	Glrlm	Runvariance
Venous	Tumor	Glrlm	Shortrunemphasis
Venous	Tumor	Glrlm	Shortrunhighgraylevelemphasis
Venous	Tumor	Glrlm	Shortrunlowgraylevelemphasis
Venous	Tumor	Glszm	Graylevelnonuniformity
Venous	Tumor	Glszm	Graylevelnonuniformitynormalized
Venous	Tumor	Glszm	Graylevelvariance
Venous	Tumor	Glszm	Highgraylevelzoneemphasis
Venous	Tumor	Glszm	Largeareaemphasis
Venous	Tumor	Glszm	Largeareahighgraylevelemphasis
Venous	Tumor	Glszm	Largearealowgraylevelemphasis
Venous	Tumor	Glszm	Lowgraylevelzoneemphasis
Venous	Tumor	Glszm	Sizezonenonuniformity
Venous	Tumor	Glszm	Sizezonenonuniformitynormalized
Venous	Tumor	Glszm	Smallareaemphasis
Venous	Tumor	Glszm	Smallareahighgraylevelemphasis
Venous	Tumor	Glszm	Smallarealowgraylevelemphasis
Venous	Tumor	Glszm	Zoneentropy
Venous	Tumor	Glszm	Zonepercentage
Venous	Tumor	Glszm	Zonevariance
Venous	Tumor	Gldm	Dependenceentropy
Venous	Tumor	Gldm	Dependencenonuniformity
Venous	Tumor	Gldm	Dependencenonuniformitynormalized
Venous	Tumor	Gldm	Dependencevariance
Venous	Tumor	Gldm	Graylevelnonuniformity
Venous	Tumor	Gldm	Graylevelvariance
Venous	Tumor	Gldm	Highgraylevelemphasis
Venous	Tumor	Gldm	Largedependenceemphasis
Venous	Tumor	Gldm	Largedependencehighgraylevelemphasis
Venous	Tumor	Gldm	Largedependencelowgraylevelemphasis
Venous	Tumor	Gldm	Lowgraylevelemphasis
Venous	Tumor	Gldm	Smalldependenceemphasis
Venous	Tumor	Gldm	Smalldependencehighgraylevelemphasis
Venous	Tumor	Gldm	Smalldependencelowgraylevelemphasis
Artery	Peritumor	Shape	Elongation
Artery	Peritumor	Shape	Flatness
Artery	Peritumor	Shape	Leastaxislength
Artery	Peritumor	Shape	Majoraxislength
Artery	Peritumor	Shape	Maximum2ddiametercolumn
Artery	Peritumor	Shape	Maximum2ddiameterrow
Artery	Peritumor	Shape	Maximum2ddiameterslice
Artery	Peritumor	Shape	Maximum3ddiameter
Artery	Peritumor	Shape	Meshvolume
Artery	Peritumor	Shape	Minoraxislength
Artery	Peritumor	Shape	Sphericity
Artery	Peritumor	Shape	Surfacearea
Artery	Peritumor	Shape	Surfacevolumeratio
Artery	Peritumor	Shape	Voxelvolume
Artery	Peritumor	Firstorder	10percentile
Artery	Peritumor	Firstorder	90percentile
Artery	Peritumor	Firstorder	Energy
Artery	Peritumor	Firstorder	Entropy
Artery	Peritumor	Firstorder	Interquartilerange
Artery	Peritumor	Firstorder	Kurtosis
Artery	Peritumor	Firstorder	Maximum
Artery	Peritumor	Firstorder	Meanabsolutedeviation
Artery	Peritumor	Firstorder	Mean
Artery	Peritumor	Firstorder	Median
Artery	Peritumor	Firstorder	Minimum
Artery	Peritumor	Firstorder	Range
Artery	Peritumor	Firstorder	Robustmeanabsolutedeviation
Artery	Peritumor	Firstorder	Rootmeansquared
Artery	Peritumor	Firstorder	Skewness
Artery	Peritumor	Firstorder	Totalenergy
Artery	Peritumor	Firstorder	Uniformity
Artery	Peritumor	Firstorder	Variance
Artery	Peritumor	Glcm	Autocorrelation
Artery	Peritumor	Glcm	Jointaverage
Artery	Peritumor	Glcm	Clusterprominence
Artery	Peritumor	Glcm	Clustershade
Artery	Peritumor	Glcm	Clustertendency
Artery	Peritumor	Glcm	Contrast
Artery	Peritumor	Glcm	Correlation
Artery	Peritumor	Glcm	Differenceaverage
Artery	Peritumor	Glcm	Differenceentropy
Artery	Peritumor	Glcm	Differencevariance
Artery	Peritumor	Glcm	Jointenergy
Artery	Peritumor	Glcm	Jointentropy
Artery	Peritumor	Glcm	Imc1
Artery	Peritumor	Glcm	Imc2
Artery	Peritumor	Glcm	Idm
Artery	Peritumor	Glcm	Idmn
Artery	Peritumor	Glcm	Id
Artery	Peritumor	Glcm	Idn
Artery	Peritumor	Glcm	Inversevariance
Artery	Peritumor	Glcm	Maximumprobability
Artery	Peritumor	Glcm	Sumentropy
Artery	Peritumor	Glcm	Sumsquares
Artery	Peritumor	Glrlm	Graylevelnonuniformity
Artery	Peritumor	Glrlm	Graylevelnonuniformitynormalized
Artery	Peritumor	Glrlm	Graylevelvariance
Artery	Peritumor	Glrlm	Highgraylevelrunemphasis
Artery	Peritumor	Glrlm	Longrunemphasis
Artery	Peritumor	Glrlm	Longrunhighgraylevelemphasis
Artery	Peritumor	Glrlm	Longrunlowgraylevelemphasis
Artery	Peritumor	Glrlm	Lowgraylevelrunemphasis
Artery	Peritumor	Glrlm	Runentropy
Artery	Peritumor	Glrlm	Runlengthnonuniformity
Artery	Peritumor	Glrlm	Runlengthnonuniformitynormalized
Artery	Peritumor	Glrlm	Runpercentage
Artery	Peritumor	Glrlm	Runvariance
Artery	Peritumor	Glrlm	Shortrunemphasis
Artery	Peritumor	Glrlm	Shortrunhighgraylevelemphasis
Artery	Peritumor	Glrlm	Shortrunlowgraylevelemphasis
Artery	Peritumor	Glszm	Graylevelnonuniformity
Artery	Peritumor	Glszm	Graylevelnonuniformitynormalized
Artery	Peritumor	Glszm	Graylevelvariance
Artery	Peritumor	Glszm	Highgraylevelzoneemphasis
Artery	Peritumor	Glszm	Largeareaemphasis
Artery	Peritumor	Glszm	Largeareahighgraylevelemphasis
Artery	Peritumor	Glszm	Largearealowgraylevelemphasis
Artery	Peritumor	Glszm	Lowgraylevelzoneemphasis
Artery	Peritumor	Glszm	Sizezonenonuniformity
Artery	Peritumor	Glszm	Sizezonenonuniformitynormalized
Artery	Peritumor	Glszm	Smallareaemphasis
Artery	Peritumor	Glszm	Smallareahighgraylevelemphasis
Artery	Peritumor	Glszm	Smallarealowgraylevelemphasis
Artery	Peritumor	Glszm	Zoneentropy
Artery	Peritumor	Glszm	Zonepercentage
Artery	Peritumor	Glszm	Zonevariance
Artery	Peritumor	Gldm	Dependenceentropy
Artery	Peritumor	Gldm	Dependencenonuniformity
Artery	Peritumor	Gldm	Dependencenonuniformitynormalized
Artery	Peritumor	Gldm	Dependencevariance
Artery	Peritumor	Gldm	Graylevelnonuniformity
Artery	Peritumor	Gldm	Graylevelvariance
Artery	Peritumor	Gldm	Highgraylevelemphasis
Artery	Peritumor	Gldm	Largedependenceemphasis
Artery	Peritumor	Gldm	Largedependencehighgraylevelemphasis
Artery	Peritumor	Gldm	Largedependencelowgraylevelemphasis
Artery	Peritumor	Gldm	Lowgraylevelemphasis
Artery	Peritumor	Gldm	Smalldependenceemphasis
Artery	Peritumor	Gldm	Smalldependencehighgraylevelemphasis
Artery	Peritumor	Gldm	Smalldependencelowgraylevelemphasis
Venous	Peritumor	Shape	Elongation
Venous	Peritumor	Shape	Flatness
Venous	Peritumor	Shape	Leastaxislength
Venous	Peritumor	Shape	Majoraxislength
Venous	Peritumor	Shape	Maximum2ddiametercolumn
Venous	Peritumor	Shape	Maximum2ddiameterrow
Venous	Peritumor	Shape	Maximum2ddiameterslice
Venous	Peritumor	Shape	Maximum3ddiameter
Venous	Peritumor	Shape	Meshvolume
Venous	Peritumor	Shape	Minoraxislength
Venous	Peritumor	Shape	Sphericity
Venous	Peritumor	Shape	Surfacearea
Venous	Peritumor	Shape	Surfacevolumeratio
Venous	Peritumor	Shape	Voxelvolume
Venous	Peritumor	Firstorder	10percentile
Venous	Peritumor	Firstorder	90percentile
Venous	Peritumor	Firstorder	Energy
Venous	Peritumor	Firstorder	Entropy
Venous	Peritumor	Firstorder	Interquartilerange
Venous	Peritumor	Firstorder	Kurtosis
Venous	Peritumor	Firstorder	Maximum
Venous	Peritumor	Firstorder	Meanabsolutedeviation
Venous	Peritumor	Firstorder	Mean
Venous	Peritumor	Firstorder	Median
Venous	Peritumor	Firstorder	Minimum
Venous	Peritumor	Firstorder	Range
Venous	Peritumor	Firstorder	Robustmeanabsolutedeviation
Venous	Peritumor	Firstorder	Rootmeansquared
Venous	Peritumor	Firstorder	Skewness
Venous	Peritumor	Firstorder	Totalenergy
Venous	Peritumor	Firstorder	Uniformity
Venous	Peritumor	Firstorder	Variance
Venous	Peritumor	Glcm	Autocorrelation
Venous	Peritumor	Glcm	Jointaverage
Venous	Peritumor	Glcm	Clusterprominence
Venous	Peritumor	Glcm	Clustershade
Venous	Peritumor	Glcm	Clustertendency
Venous	Peritumor	Glcm	Contrast
Venous	Peritumor	Glcm	Correlation
Venous	Peritumor	Glcm	Differenceaverage
Venous	Peritumor	Glcm	Differenceentropy
Venous	Peritumor	Glcm	Differencevariance
Venous	Peritumor	Glcm	Jointenergy
Venous	Peritumor	Glcm	Jointentropy
Venous	Peritumor	Glcm	Imc1
Venous	Peritumor	Glcm	Imc2
Venous	Peritumor	Glcm	Idm
Venous	Peritumor	Glcm	Idmn
Venous	Peritumor	Glcm	Id
Venous	Peritumor	Glcm	Idn
Venous	Peritumor	Glcm	Inversevariance
Venous	Peritumor	Glcm	Maximumprobability
Venous	Peritumor	Glcm	Sumentropy
Venous	Peritumor	Glcm	Sumsquares
Venous	Peritumor	Glrlm	Graylevelnonuniformity
Venous	Peritumor	Glrlm	Graylevelnonuniformitynormalized
Venous	Peritumor	Glrlm	Graylevelvariance
Venous	Peritumor	Glrlm	Highgraylevelrunemphasis
Venous	Peritumor	Glrlm	Longrunemphasis
Venous	Peritumor	Glrlm	Longrunhighgraylevelemphasis
Venous	Peritumor	Glrlm	Longrunlowgraylevelemphasis
Venous	Peritumor	Glrlm	Lowgraylevelrunemphasis
Venous	Peritumor	Glrlm	Runentropy
Venous	Peritumor	Glrlm	Runlengthnonuniformity
Venous	Peritumor	Glrlm	Runlengthnonuniformitynormalized
Venous	Peritumor	Glrlm	Runpercentage
Venous	Peritumor	Glrlm	Runvariance
Venous	Peritumor	Glrlm	Shortrunemphasis
Venous	Peritumor	Glrlm	Shortrunhighgraylevelemphasis
Venous	Peritumor	Glrlm	Shortrunlowgraylevelemphasis
Venous	Peritumor	Glszm	Graylevelnonuniformity
Venous	Peritumor	Glszm	Graylevelnonuniformitynormalized
Venous	Peritumor	Glszm	Graylevelvariance
Venous	Peritumor	Glszm	Highgraylevelzoneemphasis
Venous	Peritumor	Glszm	Largeareaemphasis
Venous	Peritumor	Glszm	Largeareahighgraylevelemphasis
Venous	Peritumor	Glszm	Largearealowgraylevelemphasis
Venous	Peritumor	Glszm	Lowgraylevelzoneemphasis
Venous	Peritumor	Glszm	Sizezonenonuniformity
Venous	Peritumor	Glszm	Sizezonenonuniformitynormalized
Venous	Peritumor	Glszm	Smallareaemphasis
Venous	Peritumor	Glszm	Smallareahighgraylevelemphasis
Venous	Peritumor	Glszm	Smallarealowgraylevelemphasis
Venous	Peritumor	Glszm	Zoneentropy
Venous	Peritumor	Glszm	Zonepercentage
Venous	Peritumor	Glszm	Zonevariance
Venous	Peritumor	Gldm	Dependenceentropy
Venous	Peritumor	Gldm	Dependencenonuniformity
Venous	Peritumor	Gldm	Dependencenonuniformitynormalized
Venous	Peritumor	Gldm	Dependencevariance
Venous	Peritumor	Gldm	Graylevelnonuniformity
Venous	Peritumor	Gldm	Graylevelvariance
Venous	Peritumor	Gldm	Highgraylevelemphasis
Venous	Peritumor	Gldm	Largedependenceemphasis
Venous	Peritumor	Gldm	Largedependencehighgraylevelemphasis
Venous	Peritumor	Gldm	Largedependencelowgraylevelemphasis
Venous	Peritumor	Gldm	Lowgraylevelemphasis
Venous	Peritumor	Gldm	Smalldependenceemphasis
Venous	Peritumor	Gldm	Smalldependencehighgraylevelemphasis
Venous	Peritumor	Gldm	Smalldependencelowgraylevelemphasis
