# Supplementary material for: Multi-View Radiomics Feature Fusion Reveals Distinct Immuno-Oncological Characteristics and Clinical Prognoses in Hepatocellular Carcinoma
Source: Cancers (Basel). 2023 Apr 17;15(8):2338. doi: 10.3390/cancers15082338 (PMC10137067; doi:10.3390/cancers15082338)
Supplement: Supplementary file 1 [file cancers-15-02338-s001.zip › Table S2.xlsx]

## Sheet: Sheet1
Clustering effects evaluation between four CPs
Combined patterns	Log-rank pvalue	Silhouette score
CP1	0.004	0.761
CP2	0.071	0.674
CP3	0.104	0.586
CP4	0.095	0.625
