# Supplementary material for: Multi-View Radiomics Feature Fusion Reveals Distinct Immuno-Oncological Characteristics and Clinical Prognoses in Hepatocellular Carcinoma
Source: Cancers (Basel). 2023 Apr 17;15(8):2338. doi: 10.3390/cancers15082338 (PMC10137067; doi:10.3390/cancers15082338)
Supplement: Supplementary file 1 [file cancers-15-02338-s001.zip › Table S3.xlsx]

## Sheet: Sheet1
Clinicopathological features between subtypes
Characteristic	FIFS1 (n= 16)	FIFS2 (n= 14)	P value
Patient demographics
Age	64.5 (54.75, 68.5)	66.5 (60.5, 68.5)	0.693
Sex			0.442
Female	4 (13.3%)	6 (20%)
Male	12 (40%)	8 (26.7%)
Etiology
Hepatitis B			1
no	11 (36.7%)	10 (33.3%)
yes	5 (16.7%)	4 (13.3%)
Hepatitis C			0.103
no	12 (40%)	14 (46.7%)
yes	4 (13.3%)	0 (0%)
Alcohol			0.399
no	11 (36.7%)	12 (40%)
yes	5 (16.7%)	2 (6.7%)
Laboratory parameters
Bilirubin	0.5 (0.3, 0.8)	0.7 (0.5, 1.1)	0.244
Creatinine	0.9 (0.72, 1.1)	0.9 (0.8, 1)	1
Platelet count	186.29 ± 81.99	258 ± 108.84	0.06
Prothrombin time	1.1 (1, 8.9)	1.05 (1, 9.55)	0.62
Serum AFP	3.5 (3, 8.75)	88 (10.75, 405.5)	0.001
Child-Pugh grade			0.458
A	13 (54.2%)	10 (41.7%)
B	0 (0%)	1 (4.2%)
Tumor grade
AJCC stage			0.675
stage I	13 (43.3%)	10 (33.3%)
stage II	3 (10%)	4 (13.3%)
T stage			0.675
T1	13 (43.3%)	10 (33.3%)
T2	3 (10%)	4 (13.3%)
histologic grade			<0.001
G1	8 (26.7%)	0 (0%)
G2	7 (23.3%)	6 (20%)
G3	1 (3.3%)	8 (26.7%)
vascular invasion			0.4
Macro	0 (0%)	2 (33.3%)
Micro	3 (50%)	1 (16.7%)
