# Supplementary material for: Multi-View Radiomics Feature Fusion Reveals Distinct Immuno-Oncological Characteristics and Clinical Prognoses in Hepatocellular Carcinoma
Source: Cancers (Basel). 2023 Apr 17;15(8):2338. doi: 10.3390/cancers15082338 (PMC10137067; doi:10.3390/cancers15082338)
Supplement: Supplementary file 1 [file cancers-15-02338-s001.zip › Table S4.xlsx]

## Sheet: deg
DEGs between subtype1 and subtype2
gene	baseMean	log2FoldChange	lfcSE	stat	pvalue	padj
KRT6A	15.7956	-23.8568	2.32482	-10.2618	1.04732e-24	1.86789e-20
IGHV1-69	63.4951	-6.46595	0.998826	-6.47355	9.57296e-11	1.70734e-07
IGHV3-15	251.394	-6.33547	0.877131	-7.22295	5.08729e-13	3.02439e-09
ODAM	287.439	-6.12487	1.506	-4.06697	4.76286e-05	0.00283152
IGLV1-44	457.177	-6.08366	0.856316	-7.10446	1.20791e-12	5.38577e-09
KRT5	76.548	-6.05463	1.02801	-5.88966	3.86979e-09	3.00077e-06
RASGRF1	388.168	-5.77315	0.817786	-7.05948	1.67121e-12	5.54451e-09
BEX1	211.644	-5.69241	1.03238	-5.51385	3.51068e-08	1.78894e-05
HS3ST4	6.10884	-5.6324	1.71255	-3.2889	0.00100579	0.0194558
SAA2	53862.8	-5.57666	0.895676	-6.2262	4.7788e-10	5.682e-07
IGKV2-30	7.53459	-5.56923	1.18154	-4.71355	2.43441e-06	0.000371091
DSG3	5.05846	-5.56735	1.49582	-3.72195	0.000197691	0.00702356
AC007163.2	7.19431	-5.53753	1.60972	-3.44005	0.000581597	0.0136686
SLC12A1	113.829	-5.52217	1.04655	-5.27655	1.31637e-07	4.69549e-05
IGLV3-9	17.3278	-5.4911	0.933593	-5.88168	4.06126e-09	3.01803e-06
IGHV1-69-2	74.3442	-5.29385	0.753819	-7.0227	2.17614e-12	5.54451e-09
IGLC3	1377.58	-5.2235	0.866229	-6.03017	1.63792e-09	1.62291e-06
IGLV6-57	165.966	-5.09358	0.863246	-5.90049	3.62417e-09	2.93805e-06
MT1H	610.051	-5.07769	0.936139	-5.42407	5.82559e-08	2.65616e-05
IGJ	1087.14	-5.05676	0.66333	-7.6233	2.47268e-14	2.20501e-10
IGHV4-59	142.466	-4.8964	0.788566	-6.20924	5.32401e-10	5.93461e-07
IGKV1-16	41.5195	-4.85202	0.968667	-5.00897	5.47221e-07	0.000131888
IGLV3-1	74.898	-4.82532	0.895706	-5.38718	7.15734e-08	2.89536e-05
CLEC1B	20.4583	-4.80576	0.883511	-5.43939	5.34646e-08	2.50932e-05
IGLC2	1711.14	-4.8005	0.757176	-6.34001	2.29746e-10	3.4146e-07
IGLV2-14	207.231	-4.60876	0.739994	-6.22811	4.72108e-10	5.682e-07
IGLV3-19	173.462	-4.60432	0.749131	-6.14622	7.93534e-10	8.32511e-07
IGLV10-54	10.3592	-4.55885	0.955547	-4.77094	1.83372e-06	0.000311471
IGLV1-40	177.289	-4.55882	0.730624	-6.23963	4.38613e-10	5.682e-07
IGLV1-51	211.793	-4.55595	0.647998	-7.03082	2.05326e-12	5.54451e-09
IGLV5-37	1.84398	-4.54102	1.42773	-3.18058	0.00146983	0.024578
IGLV1-47	137.338	-4.53714	0.831029	-5.45966	4.77043e-08	2.36335e-05
GAST	20.4855	-4.52494	1.98125	-2.28388	0.0223788	0.125551
IGHG2	3444.04	-4.51996	0.839638	-5.38322	7.31633e-08	2.89536e-05
IGHV3-72	11.4622	-4.4912	0.872596	-5.14695	2.6476e-07	8.14138e-05
IGHV3OR16-13	2.06664	-4.48081	1.71595	-2.61128	0.00902049	0.073294
ACER1	13.0773	-4.47112	0.946607	-4.72331	2.32041e-06	0.000356763
IGKV5-2	2.67177	-4.4216	1.23223	-3.58828	0.000332864	0.00962548
IGHV1-18	155.074	-4.39655	0.812939	-5.40822	6.36548e-08	2.70305e-05
IGLV5-45	12.6072	-4.37109	0.837445	-5.21955	1.79356e-07	6.0355e-05
IGLV9-49	15.149	-4.32569	0.912719	-4.73934	2.14412e-06	0.000339412
IGHV4-39	130.493	-4.26629	0.716888	-5.95113	2.66305e-09	2.26169e-06
IGLV3-21	211.375	-4.25173	0.811261	-5.24089	1.59808e-07	5.48112e-05
IGKV2D-29	25.3238	-4.21504	1.06726	-3.9494	7.83468e-05	0.00388463
CYP1A2	3975.93	-4.20383	0.956093	-4.39688	1.09817e-05	0.00103756
IGLV2-8	43.8459	-4.16378	0.822039	-5.06518	4.08008e-07	0.000110651
IGLV1-36	11.2414	-4.14057	0.966802	-4.28275	1.84597e-05	0.00154567
IGHV4-4	3.44632	-4.13846	1.07304	-3.85675	0.000114907	0.00501907
IGHV3-74	83.0177	-4.12125	0.813916	-5.06349	4.11649e-07	0.000110651
IGLV8-61	32.9191	-4.11736	0.82289	-5.00353	5.6289e-07	0.000133855
LUZP2	23.5113	-4.10912	0.733067	-5.60537	2.07806e-08	1.15819e-05
IGKV1D-13	5.30844	-4.07155	1.19701	-3.40143	0.000670339	0.0150763
IGLV3-10	30.781	-4.0676	0.85517	-4.75648	1.96998e-06	0.000319405
IGKV3-20	266.689	-4.04108	0.692416	-5.83621	5.34025e-09	3.59155e-06
IGLV2-11	103.152	-4.02574	0.782917	-5.14197	2.71866e-07	8.21818e-05
IGHV2-70	8.87401	-3.99017	0.942056	-4.2356	2.27943e-05	0.00177527
SULT4A1	197.372	-3.9645	1.27736	-3.10366	0.00191143	0.0291942
IGHV4-34	52.4617	-3.96214	0.73652	-5.37954	7.46771e-08	2.89536e-05
IGHV1-2	36.3846	-3.94018	0.819867	-4.80588	1.54073e-06	0.000269402
CKMT2	254.331	-3.93862	0.730258	-5.39346	6.91134e-08	2.8666e-05
IGKV3-15	73.1628	-3.91721	0.687528	-5.69753	1.21556e-08	7.22653e-06
CACNA1I	36.0967	-3.90512	0.800203	-4.88016	1.06e-06	0.000207749
IGHV3-23	163.318	-3.90503	0.721095	-5.41542	6.11456e-08	2.65983e-05
GDF2	7.59801	-3.87586	1.45241	-2.66857	0.00761743	0.0659179
PSG9	1.1416	-3.84648	1.57682	-2.43939	0.014712	0.0981555
KRT14	8.68175	-3.8373	1.22246	-3.13899	0.00169528	0.026852
IGHM	2538.69	-3.82206	0.705166	-5.42008	5.95718e-08	2.65616e-05
IGKV4-1	256.957	-3.81969	0.692444	-5.51624	3.46331e-08	1.78894e-05
PEBP4	63.302	-3.78093	0.924425	-4.09003	4.31314e-05	0.002671
IGLV2-18	5.23733	-3.77343	0.854044	-4.41831	9.9475e-06	0.000974801
IGHV3-7	1.73381	-3.76289	1.04483	-3.60144	0.000316454	0.00935242
C1orf64	21.3864	-3.75464	1.00653	-3.7303	0.000191255	0.00687663
AMBN	2.33259	-3.75072	1.44792	-2.59041	0.00958619	0.0761558
IGHG3	1497.96	-3.74258	0.740582	-5.05357	4.33629e-07	0.000113732
CTNNA2	181.862	-3.7389	1.04453	-3.57951	0.000344237	0.00979181
NDST3	4.28172	-3.73797	0.832649	-4.48926	7.14723e-06	0.000767896
IGHG1	15211.9	-3.71532	0.796525	-4.66441	3.09497e-06	0.000434636
SLC38A8	26.5469	-3.70017	1.24031	-2.98326	0.00285197	0.036939
RSPO1	1.21519	-3.69409	1.71606	-2.15266	0.0313457	0.153018
IGKC	4212.97	-3.67183	0.684291	-5.36589	8.05504e-08	2.99295e-05
IGKV1-5	202.616	-3.66253	0.746988	-4.90306	9.43555e-07	0.000192318
IGHV1-46	37.7198	-3.65984	0.726697	-5.03627	4.74686e-07	0.000120943
RP11-481F24.3	13.8355	-3.64212	1.34863	-2.70061	0.00692134	0.0625395
TBL1Y	2.22011	-3.63816	1.3194	-2.75743	0.00582582	0.0563468
IGHV1-24	31.9408	-3.62008	0.916505	-3.94987	7.81934e-05	0.00388463
CRHBP	271.816	-3.61409	0.626677	-5.76707	8.06608e-09	5.1378e-06
MT1G	6120.6	-3.59107	0.833664	-4.30758	1.65052e-05	0.00142898
IGLC7	7.57754	-3.59042	0.731843	-4.906	9.29524e-07	0.000192318
DSC3	6.63451	-3.57482	0.961112	-3.71947	0.000199645	0.00703689
IGHV3-48	12.677	-3.53641	0.915423	-3.86315	0.000111936	0.0049172
FCRL5	17.7756	-3.51217	0.76191	-4.60969	4.03265e-06	0.000528841
CLEC4M	10.167	-3.50821	1.25817	-2.78835	0.00529768	0.0532005
TRAV14DV4	3.1183	-3.47631	1.09696	-3.16904	0.00152944	0.0251726
RHBDL3	59.8314	-3.47618	0.892162	-3.89636	9.76487e-05	0.00450017
SLC6A2	131.291	-3.46767	1.30385	-2.65957	0.00782408	0.0669911
CXCL14	61.3081	-3.46471	0.7832	-4.42379	9.69855e-06	0.000955655
DUOXA2	51.9698	-3.46198	0.995713	-3.47689	0.000507266	0.0125654
SELE	251.377	-3.4331	0.706267	-4.86092	1.16844e-06	0.000224819
HAMP	1501.98	-3.42975	0.85498	-4.0115	6.03346e-05	0.00333793
IGKV1-6	13.7993	-3.42453	0.744187	-4.6017	4.19055e-06	0.000533846
IGHG4	464.401	-3.41505	0.763762	-4.47135	7.77282e-06	0.000820079
KLK4	1.62517	-3.40254	1.37119	-2.48145	0.0130848	0.0917687
IGKV1-27	12.4276	-3.39585	0.855485	-3.9695	7.20234e-05	0.0036912
HCAR3	21.2493	-3.36594	0.818551	-4.11208	3.92118e-05	0.00249188
RFPL1	1.17332	-3.36266	1.45489	-2.31129	0.0208169	0.120856
KRT1	7.84586	-3.35989	1.19214	-2.81838	0.00482667	0.0502532
INS-IGF2	60.1511	-3.35783	1.52083	-2.20789	0.027252	0.140537
AQP6	74.3314	-3.35394	1.11153	-3.01742	0.00254939	0.0348417
IGLV7-46	18.4194	-3.34101	0.909112	-3.67502	0.000237829	0.00785885
IGHV3-21	44.1622	-3.33833	0.713209	-4.68072	2.85873e-06	0.000414515
CHRNA6	2.03332	-3.33077	0.875674	-3.80366	0.000142571	0.00573986
IGHV3-13	9.97824	-3.3177	0.941306	-3.52457	0.000424175	0.0113421
FCRL3	49.7823	-3.30124	0.645734	-5.11238	3.18125e-07	9.30124e-05
IGHV3-30	29.2453	-3.28639	0.750376	-4.37966	1.18864e-05	0.00109842
KCNJ6	40.9396	-3.2834	1.12655	-2.91456	0.00356188	0.0420982
FAM92B	2.6018	-3.25775	1.18742	-2.74354	0.00607806	0.0580623
IGLV7-43	11.5256	-3.23383	0.729738	-4.43149	9.35821e-06	0.000937661
UPP2	393.395	-3.22523	0.698706	-4.61601	3.91191e-06	0.000520663
IGHV1-3	1.62782	-3.21128	1.0533	-3.04879	0.00229768	0.0326008
HCAR2	34.5438	-3.21002	0.630206	-5.0936	3.5132e-07	0.000101061
PRAMEF7	8.56531	-3.19632	1.27962	-2.49786	0.0124945	0.0891004
IGHV3-33	15.6052	-3.19326	0.714354	-4.47014	7.81684e-06	0.000820079
IGHV2-5	3.80354	-3.18279	0.909253	-3.50044	0.000464487	0.012006
SLCO1B7	4.92774	-3.17368	0.966237	-3.28457	0.00102137	0.0195452
LHX3	39.1413	-3.17121	1.09426	-2.89804	0.00375508	0.0437438
IGHV3-73	9.30827	-3.16421	0.717606	-4.40941	1.03655e-05	0.00100472
IGHA2	459.387	-3.1543	0.756469	-4.16976	3.04918e-05	0.00215802
IGKV3-11	185.218	-3.14984	0.642569	-4.90195	9.48917e-07	0.000192318
IGKV1-12	1.59496	-3.14767	1.02558	-3.06916	0.00214658	0.0314579
MZB1	87.9384	-3.14499	0.631125	-4.98314	6.25601e-07	0.000141826
CTD-2353F22.2	1.59729	-3.14306	1.09566	-2.86865	0.00412231	0.0459509
TRBV12-4	3.35344	-3.13713	0.894991	-3.50521	0.000456256	0.011862
GABBR2	45.6072	-3.13703	0.90395	-3.47036	0.000519769	0.0127321
LY6D	2.17871	-3.13154	1.57192	-1.99217	0.0463525	0.192934
MT1M	369.233	-3.10376	0.731148	-4.24504	2.18552e-05	0.00173239
IGLL5	127.818	-3.10342	0.685975	-4.5241	6.06524e-06	0.000697894
IGHV4-28	4.69377	-3.09214	0.931803	-3.31845	0.000905191	0.0182603
IGKV2-24	10.0764	-3.09109	0.775128	-3.98784	6.66762e-05	0.00354579
TNFRSF17	4.23991	-3.08457	0.656226	-4.70047	2.59567e-06	0.000389023
HAPLN1	11.376	-3.06401	0.96447	-3.17688	0.00148866	0.0247017
CYP2E1	96414.5	-3.06369	0.894907	-3.42347	0.000618272	0.0141916
IGHV4-61	7.36185	-3.06272	0.809991	-3.78118	0.000156087	0.00609671
SPACA1	1.25084	-3.05115	1.55572	-1.96125	0.0498503	0.201743
MARCO	163.861	-3.05063	0.826998	-3.6888	0.000225316	0.0075821
IGKV1D-16	3.05714	-3.03837	0.990297	-3.06814	0.00215398	0.0314655
NKD1	1068.26	-3.03434	0.848076	-3.57792	0.000346343	0.00982598
DUOX2	115.306	-3.02931	0.842846	-3.59415	0.000325456	0.00947599
CD5L	688.141	-3.01588	0.644856	-4.67682	2.91355e-06	0.000418044
KRT12	3.63997	-2.99961	1.19587	-2.50832	0.0121308	0.0877695
DYNC1I1	410.24	-2.98865	0.829568	-3.60265	0.000314986	0.00933185
IGLV3-27	6.22116	-2.98769	1.03925	-2.87485	0.00404218	0.045372
IGKV1-17	16.1132	-2.9853	0.662929	-4.5032	6.69392e-06	0.00073243
RP11-545J16.1	8.44359	-2.97805	0.875203	-3.40269	0.000667255	0.0150412
RP11-71L14.3	1.79834	-2.9765	1.09712	-2.71301	0.00666743	0.0611381
SLCO1B3	591.018	-2.95511	1.2253	-2.41174	0.0158765	0.102253
MS4A1	50.9212	-2.94155	0.772963	-3.80555	0.000141491	0.00570928
RP11-294C11.2	0.855289	-2.93658	1.03328	-2.84201	0.00448307	0.048108
IGHV3-11	26.7214	-2.92808	0.734459	-3.98672	6.69931e-05	0.00354579
IGKV3-7	2.94969	-2.92586	1.04022	-2.81273	0.00491225	0.0508138
KLRC4-KLRK1	3.26323	-2.92222	0.882055	-3.31296	0.000923131	0.0184574
KLRK1	12.0301	-2.91532	0.654735	-4.45267	8.48096e-06	0.000879407
PRAMEF8	11.7734	-2.90681	1.15046	-2.52665	0.0115157	0.084987
HEPACAM	592.242	-2.90117	1.35509	-2.14094	0.0322788	0.15593
GRPR	59.7916	-2.88826	0.976706	-2.95715	0.003105	0.0389984
AMPD1	2.65582	-2.88509	0.966437	-2.98528	0.00283318	0.0368024
GALNT13	14.8184	-2.8818	0.811067	-3.5531	0.000380714	0.0105109
SLC14A2	30.0852	-2.87512	0.832803	-3.45234	0.00055574	0.0132365
CXCL9	1652.21	-2.87381	0.680019	-4.22607	2.37808e-05	0.00182815
BCO2	500.331	-2.87258	0.597142	-4.81055	1.50517e-06	0.000267967
SOX2	2.53002	-2.86854	1.04116	-2.75515	0.00586655	0.0565873
PZP	154.863	-2.86399	0.610717	-4.68955	2.73803e-06	0.000403576
HBA1	5.9139	-2.85347	0.75918	-3.75863	0.000170848	0.00636883
DLK1	14.3874	-2.84984	1.10039	-2.58985	0.00960177	0.0762456
IGLV4-60	5.92401	-2.84039	1.00572	-2.82423	0.00473939	0.0496051
IGKV3D-11	2.34898	-2.83951	0.946317	-3.00058	0.00269462	0.0355779
MT1F	875.752	-2.83383	0.665271	-4.25966	2.0474e-05	0.00165228
TWIST2	34.0198	-2.83361	0.825707	-3.43174	0.000599722	0.0139453
IGHV1-58	2.50007	-2.826	0.821379	-3.44055	0.000580526	0.0136686
SAA2-SAA4	5206.2	-2.81447	0.967614	-2.90867	0.00362972	0.0426738
FITM1	148.725	-2.80632	0.55138	-5.08962	3.58773e-07	0.000101567
AC145676.2	9.82309	-2.79902	0.744635	-3.75891	0.000170653	0.00636883
TTC24	5.31349	-2.79017	0.762248	-3.66045	0.000251776	0.00807632
NXF3	12.042	-2.78281	0.750025	-3.71029	0.000207024	0.00717755
STYK1	5.94497	-2.76843	0.889087	-3.11379	0.00184704	0.0284964
KIAA0408	0.927158	-2.76148	1.3928	-1.98268	0.047403	0.195702
IGKV1-8	5.88369	-2.75809	0.837947	-3.29149	0.000996587	0.0193857
SAA1	111569	-2.74343	0.955652	-2.87074	0.00409511	0.0457908
TMEM154	181.415	-2.72863	0.65551	-4.16261	3.14628e-05	0.00220055
LYPD2	2.82718	-2.72241	1.20713	-2.25527	0.0241166	0.131254
IGHV3-64	4.27069	-2.72234	1.06512	-2.55592	0.0105909	0.0809045
CHL1	228.082	-2.72018	1.26367	-2.1526	0.03135	0.153018
FAM106A	1.6145	-2.72014	1.22176	-2.22641	0.0259866	0.13696
MGAT4C	80.0608	-2.70801	0.826704	-3.27568	0.00105409	0.0198729
IGKV6-21	3.63204	-2.70711	1.32823	-2.03814	0.0415359	0.179717
LPA	1816.05	-2.7043	0.523269	-5.16809	2.365e-07	7.44535e-05
TRAV41	1.61251	-2.70347	1.19142	-2.26911	0.0232615	0.128515
GNRH2	17.8087	-2.69244	0.905233	-2.97431	0.00293651	0.0377324
CLEC4G	37.0419	-2.68438	0.718316	-3.73705	0.000186193	0.00676323
TRAV36DV7	1.1907	-2.6754	0.97849	-2.73421	0.00625297	0.0589056
IGHV6-1	1.02155	-2.67523	1.13281	-2.36159	0.0181968	0.111106
IGHV3-53	9.67038	-2.67404	0.685152	-3.90285	9.50673e-05	0.00441543
GPR15	2.44315	-2.66975	1.05159	-2.53877	0.0111243	0.0832924
SYNDIG1	15.414	-2.66638	1.05811	-2.51994	0.0117375	0.0858991
CYP1A1	3566.68	-2.66528	0.910364	-2.92771	0.00341471	0.0411845
TRIM63	6.95753	-2.65806	0.922464	-2.88148	0.00395815	0.0449646
IGLV4-69	17.499	-2.64143	0.769211	-3.43394	0.000594873	0.0138687
FCRL2	8.956	-2.62088	0.867721	-3.02041	0.00252431	0.0346123
IFI27	19774.3	-2.61577	0.724658	-3.60967	0.000306588	0.00918992
ADH1C	37695.6	-2.61381	0.580069	-4.50604	6.6049e-06	0.000728583
CCR8	7.55691	-2.61237	0.776572	-3.36398	0.000768271	0.0164097
IGHV2-26	6.5385	-2.60149	0.857737	-3.03296	0.00242164	0.033795
TRAV19	4.17099	-2.60077	0.857413	-3.03327	0.00241919	0.0337872
C8orf34	0.796328	-2.59927	1.00498	-2.5864	0.00969856
SULT1B1	1736.06	-2.5796	0.572036	-4.50951	6.49775e-06	0.000724655
IGHV5-51	45.6311	-2.57633	0.610648	-4.21902	2.45368e-05	0.00187817
CCDC177	210.931	-2.57424	0.941912	-2.73299	0.0062762	0.0589056
UST	87.3181	-2.57408	0.509749	-5.04969	4.42518e-07	0.000114381
MAPK4	328.211	-2.56503	1.05294	-2.43607	0.0148477	0.0984766
IGHV4-31	7.41862	-2.56447	0.74128	-3.45951	0.000541153	0.0129898
GOLGA8O	1.3509	-2.55289	1.15776	-2.20502	0.0274525	0.141078
FAM153B	13.2712	-2.55108	0.851524	-2.9959	0.00273632	0.0359899
PYROXD2	702.462	-2.54717	0.62054	-4.10476	4.04731e-05	0.00255066
PROL1	190.452	-2.53295	1.22152	-2.0736	0.0381161	0.171111
RGSL1	47.7435	-2.52839	1.0797	-2.34175	0.0191935	0.11491
RFPL4AL1	0.794896	-2.52449	1.12328	-2.24743	0.0246124
TCL1A	6.17934	-2.51099	0.70264	-3.57366	0.000352028	0.0099185
IGKV3D-20	6.46192	-2.50888	0.984759	-2.54771	0.0108434	0.0822537
IGKV1D-8	2.51895	-2.50447	0.804493	-3.1131	0.00185133	0.028538
MYH3	237.688	-2.5028	0.529632	-4.72555	2.29498e-06	0.000355921
FLG	7.46001	-2.50186	0.863183	-2.89842	0.00375054	0.0437195
MT1X	8545.62	-2.49093	0.627149	-3.97183	7.13227e-05	0.00366582
IGHV3-20	1.85024	-2.48287	0.858962	-2.89055	0.00384568	0.0442821
TRBV6-6	2.39603	-2.47834	0.770978	-3.21454	0.00130653	0.023105
SMPD3	107.341	-2.47696	0.501035	-4.94368	7.66617e-07	0.000163106
SIK1	536.766	-2.46708	0.931243	-2.64923	0.00806754	0.0682564
RANBP3L	59.2467	-2.46558	0.635822	-3.87778	0.000105412	0.00475955
FCN2	156.775	-2.46521	0.844963	-2.91753	0.00352812	0.0417822
ST8SIA6	4.71806	-2.46289	0.70139	-3.51144	0.000445678	0.0116858
CD38	184.853	-2.46147	0.497591	-4.94677	7.54562e-07	0.000163106
TRIM50	329.992	-2.45669	0.960133	-2.5587	0.0105064	0.0805942
EXPH5	300.669	-2.45635	0.599667	-4.09618	4.20021e-05	0.00261013
CCL18	156.91	-2.43801	0.545615	-4.46836	7.88218e-06	0.000822098
IL1RL1	46.5862	-2.43795	0.568734	-4.28663	1.81402e-05	0.00153332
FAM180A	82.0514	-2.43734	0.687431	-3.54558	0.000391752	0.0106833
MMP3	5.0707	-2.41686	1.10915	-2.17901	0.029331	0.146774
RFPL4A	5.45682	-2.41644	0.614211	-3.93422	8.34667e-05	0.00403842
TRAV6	1.1154	-2.41021	0.948697	-2.54055	0.0110678	0.0830083
FMR1NB	1.27329	-2.4093	0.951258	-2.53275	0.0113173	0.084172
HBB	1315.09	-2.40893	0.578511	-4.16403	3.12684e-05	0.00219556
TMEM200C	51.4576	-2.39146	0.586813	-4.07533	4.59483e-05	0.00276481
ZNF831	38.1211	-2.38986	0.500328	-4.77659	1.78292e-06	0.000305754
KCND3	1005.33	-2.3866	0.749975	-3.18224	0.00146143	0.024578
IGKV1-9	21.6065	-2.3827	0.740028	-3.21974	0.00128305	0.0228832
CCBE1	38.4953	-2.3781	0.674629	-3.52504	0.000423416	0.0113388
IGHA1	1888.11	-2.37803	0.627162	-3.79173	0.000149603	0.00590303
LTF	150.507	-2.37703	0.691134	-3.43932	0.000583184	0.0136856
RP11-120K19.3	3.67662	-2.37632	0.886183	-2.68152	0.00732889	0.0645485
TRAV8-1	1.31529	-2.36324	1.02886	-2.29696	0.0216213	0.123043
NOTUM	6380.45	-2.36138	0.951853	-2.48082	0.013108	0.0918951
RP11-609D21.3	6.6541	-2.36001	0.647292	-3.64597	0.000266381	0.0084236
CD79A	47.8919	-2.35925	0.558167	-4.22679	2.37052e-05	0.00182815
TRBV6-5	5.51951	-2.35211	0.702256	-3.34936	0.000809983	0.0170113
IGF2	7118.96	-2.34374	0.756436	-3.09839	0.00194574	0.0295339
GNAO1	584.134	-2.34135	0.699098	-3.3491	0.000810742	0.0170113
FAM9C	1.44151	-2.33969	1.08179	-2.1628	0.0305569	0.150465
FOSB	1860.54	-2.33957	0.677341	-3.45405	0.00055223	0.0132024
PLXNA4	35.2806	-2.33856	0.71172	-3.28579	0.00101697	0.0195186
IL12RB2	21.852	-2.33126	0.569068	-4.09664	4.19197e-05	0.00261013
ESR1	742.517	-2.32751	0.659324	-3.53015	0.000415331	0.0112064
PADI1	15.2502	-2.31941	0.940344	-2.46656	0.0136419	0.0943186
COL4A3	59.1485	-2.31819	0.624849	-3.71	0.000207258	0.00717755
TRAV9-2	2.65463	-2.31482	0.76741	-3.01641	0.00255789	0.0348776
BLK	39.414	-2.30538	0.631189	-3.65245	0.000259751	0.00825786
COLEC10	102.98	-2.30367	0.644998	-3.57159	0.000354816	0.00996559
OPN4	4.04437	-2.30352	0.992254	-2.3215	0.02026	0.11914
CD8A	359.303	-2.30308	0.599489	-3.84173	0.000122168	0.00520017
SDK2	76.1698	-2.29533	0.690697	-3.32321	0.000889871	0.018111
IFI6	8539.86	-2.29349	0.521786	-4.39547	1.10534e-05	0.00103756
GRAP2	201.032	-2.28468	0.574359	-3.97779	6.95597e-05	0.00362107
CFHR3	7598.89	-2.28453	0.653519	-3.49573	0.000472764	0.0120916
SLC22A1	14286.1	-2.28252	0.792202	-2.88124	0.0039612	0.0449646
IGLV2-23	64.174	-2.27421	0.625777	-3.63421	0.00027883	0.00869395
ANKRD33B	67.7381	-2.26545	0.520249	-4.35456	1.33334e-05	0.00119324
TRAV26-1	2.56496	-2.25758	0.90941	-2.48246	0.0130478	0.0917476
GREM2	1314.75	-2.25598	0.944215	-2.38926	0.0168823	0.106394
IQSEC3	58.2746	-2.25535	0.553479	-4.07486	4.60415e-05	0.00276481
KCNN2	77.1475	-2.25226	0.719242	-3.13144	0.00173953	0.0273344
PADI4	9.68965	-2.24913	0.731308	-3.07549	0.00210159	0.0311512
GPR17	34.6015	-2.24387	0.619857	-3.61999	0.000294619	0.00901293
CTD-3126B10.5	1.22372	-2.24344	0.957389	-2.34329	0.0191145	0.114602
IGHV3-49	13.5009	-2.24322	0.742375	-3.02168	0.00251374	0.0345397
RP11-426C22.1	9.06153	-2.2384	0.978117	-2.28848	0.0221094	0.124667
FAM167A	56.8671	-2.23477	0.562645	-3.97191	7.12993e-05	0.00366582
TNR	12.7303	-2.23284	1.13313	-1.9705	0.0487809	0.198999
DTHD1	7.9108	-2.23098	0.742808	-3.00344	0.00266949	0.0355028
GPR182	41.257	-2.23025	0.623929	-3.57452	0.000350869	0.00991718
FBXL16	211.47	-2.22918	0.737119	-3.02418	0.00249308	0.0343617
TRBV6-1	2.51869	-2.22915	0.65773	-3.38916	0.000701083	0.0155289
PLA2G2D	38.6772	-2.22773	0.697886	-3.19211	0.00141238	0.0241744
KCNJ10	25.9338	-2.22211	0.544619	-4.08013	4.50104e-05	0.00274199
IGHV3-66	5.36398	-2.22148	0.823814	-2.69658	0.00700558	0.0627547
FGF14	136.531	-2.21797	0.686341	-3.23158	0.00123107	0.0221331
DRD1	66.1012	-2.21246	0.725477	-3.04967	0.00229094	0.0325483
VWA3B	10.8179	-2.20726	0.735571	-3.00074	0.00269328	0.0355779
RTP5	2.34337	-2.20376	0.863926	-2.55086	0.0107457	0.0817964
C15orf43	12.6686	-2.20106	0.95714	-2.29962	0.0214698	0.122729
ICAM5	20.3568	-2.19208	0.667995	-3.28159	0.00103225	0.019669
KCNAB2	1770.99	-2.19103	0.559253	-3.91778	8.93669e-05	0.00426165
PAX5	37.5477	-2.18764	0.687761	-3.18081	0.00146863	0.024578
ADH1B	101068	-2.18727	0.583799	-3.74662	0.000179235	0.00659103
STAB2	60.9887	-2.18268	0.651207	-3.35174	0.000803056	0.0169734
PKHD1	181.727	-2.18005	0.583895	-3.73364	0.000188733	0.0068277
PPP1R27	10.5797	-2.17683	0.641587	-3.39288	0.000691616	0.0154613
XAF1	322.902	-2.1741	0.43792	-4.9646	6.88423e-07	0.000151581
MT2A	24063.3	-2.17012	0.552733	-3.92616	8.63125e-05	0.00414928
KCNJ1	1.34277	-2.16992	0.992052	-2.18731	0.0287201	0.145142
HDC	77.7278	-2.16814	0.576769	-3.75912	0.000170514	0.00636883
EOMES	56.9875	-2.16775	0.472801	-4.58492	4.54164e-06	0.000566435
AC022431.2	2.77361	-2.16144	0.8923	-2.42232	0.0154217	0.100411
TEPP	0.875791	-2.1518	1.08496	-1.9833	0.0473344	0.195464
TRBV14	1.47608	-2.14831	0.766871	-2.8014	0.00508813	0.0518553
GPR171	41.0932	-2.13551	0.532258	-4.01218	6.01615e-05	0.00333793
KLK1	1.45315	-2.13519	0.962676	-2.21797	0.0265567	0.138742
FRMD3	294.938	-2.13423	0.507865	-4.20236	2.64149e-05	0.00196262
LY9	195.761	-2.13412	0.486897	-4.38309	1.17006e-05	0.00108687
TRAV2	2.78303	-2.13336	0.717917	-2.9716	0.00296252	0.0378756
PLAC8	70.0852	-2.11778	0.511116	-4.14345	3.42114e-05	0.00232554
ITK	111.925	-2.11741	0.469949	-4.50562	6.61791e-06	0.000728583
PTPN13	75.4364	-2.11486	0.576729	-3.66698	0.00024543	0.00793891
IGKV1OR2-108	6.7084	-2.11332	0.796377	-2.65367	0.00796225	0.0677513
CYP3A4	57502.7	-2.11276	0.971007	-2.17585	0.0295667	0.147338
RP11-319G9.4	1.18958	-2.10546	1.05207	-2.00126	0.0453639	0.190153
NR4A3	340.594	-2.10232	0.542659	-3.8741	0.000107018	0.00479567
TRBV29-1	7.86479	-2.09038	0.619644	-3.37351	0.000742154	0.016044
SLAMF6	96.9587	-2.09032	0.439159	-4.75983	1.93755e-06	0.00031703
NRK	12.3039	-2.08838	0.76897	-2.71582	0.00661128	0.0607795
TRGV4	4.29789	-2.08832	0.609973	-3.42363	0.000617905	0.0141916
MT1E	4917.65	-2.08717	0.692139	-3.01553	0.00256528	0.034925
SLC16A11	974.094	-2.08699	0.52112	-4.00481	6.20664e-05	0.00339395
CLEC17A	3.24369	-2.08459	0.687769	-3.03094	0.00243792	0.0338512
CNKSR1	20.5918	-2.07459	0.63235	-3.28077	0.00103524	0.019684
PI16	6.36625	-2.07428	0.801829	-2.58694	0.00968327	0.0765035
FCN3	279.586	-2.06864	0.60341	-3.42825	0.000607494	0.0140527
RDH16	14739.7	-2.06613	0.626563	-3.29756	0.000975282	0.0191777
ADRA1B	176.052	-2.05761	0.423562	-4.85787	1.18657e-06	0.000225132
ENO3	1688.74	-2.04758	0.617921	-3.31366	0.000920819	0.0184319
TMEM178B	147.451	-2.04736	0.828568	-2.47096	0.0134751	0.09344
TENM1	469.179	-2.04401	0.911693	-2.24199	0.0249618	0.134204
NCAN	8.15669	-2.04249	0.688008	-2.9687	0.00299067	0.0381261
AHNAK2	205.977	-2.03956	0.793296	-2.57099	0.0101408	0.0789786
FKSG62	9.66701	-2.03881	0.946597	-2.15383	0.0312534	0.152684
CYP26A1	94.1454	-2.03849	0.772583	-2.63855	0.00832624	0.0696274
CXCL12	1991.83	-2.0318	0.510112	-3.98304	6.80392e-05	0.00358463
GPM6A	53.7244	-2.0301	0.580859	-3.49501	0.000474051	0.0120954
RP11-205K6.3	1.13889	-2.02794	0.946843	-2.14179	0.0322105	0.155726
PDE11A	337.599	-2.02632	0.661144	-3.06487	0.00217768	0.0315837
ATOH7	12.4126	-2.02616	0.482594	-4.19847	2.68722e-05	0.00198044
SIGLEC6	4.66168	-2.02568	0.872571	-2.3215	0.0202597	0.11914
TRBV4-2	3.43412	-2.02228	0.864429	-2.33944	0.0193129	0.115411
SH2D1A	62.7312	-2.0164	0.486328	-4.14618	3.38065e-05	0.00231011
NAT2	442.273	-2.01382	0.785341	-2.56426	0.0103395	0.0800368
ATP1A3	10.8443	-2.01076	0.584963	-3.43741	0.000587307	0.0137643
SLC6A7	3.64735	-2.00294	0.669877	-2.99002	0.00278962	0.0364757
GRIK3	1.88549	-2.00217	0.993281	-2.01571	0.0438299	0.185943
KLRD1	105.392	-1.9999	0.468655	-4.26731	1.9784e-05	0.00161857
CFP	193.546	-1.99986	0.416369	-4.8031	1.56231e-06	0.000270523
TIGD2	957.71	-1.99851	0.340948	-5.86164	4.58316e-09	3.26963e-06
NETO1	3.79839	-1.98613	0.879974	-2.25703	0.0240059	0.130942
ANXA8	4.84923	-1.98526	0.859717	-2.3092	0.0209326	0.121104
CFHR4	2974.12	-1.983	0.660932	-3.00031	0.00269702	0.0355779
FSD1	16.2042	-1.98067	0.622771	-3.18042	0.00147061	0.024578
OR7D2	6.50492	-1.9785	0.925527	-2.1377	0.0325411	0.15673
C1QTNF3	365.871	-1.97346	0.537647	-3.67055	0.000242025	0.00787686
ACKR2	661.063	-1.97319	0.498683	-3.95681	7.59575e-05	0.00385955
BTLA	16.5066	-1.97195	0.550443	-3.58247	0.000340363	0.00970535
CLNK	8.89463	-1.96911	0.563741	-3.49293	0.000477754	0.0121397
SCUBE2	101.38	-1.96484	0.645411	-3.04433	0.00233202	0.0328787
STEAP4	1069.81	-1.95975	0.547073	-3.58225	0.000340653	0.00970535
PNOC	3.16555	-1.95631	0.703871	-2.77937	0.00544652	0.0542521
CRTAC1	15.6309	-1.95598	0.847525	-2.30787	0.0210063	0.121385
TMEM100	139.267	-1.95223	0.556534	-3.50784	0.000451758	0.0117794
RAB39A	6.13706	-1.95006	0.593399	-3.28626	0.00101528	0.0195186
PROK1	6.56614	-1.94693	0.799193	-2.43612	0.0148457	0.0984766
TPBGL	48.8727	-1.94551	0.725944	-2.67997	0.00736286	0.0646599
CHRNA1	3.2865	-1.94237	0.766579	-2.53381	0.011283	0.0840217
IGHD	24.8054	-1.94206	0.751331	-2.58482	0.00974292	0.0767201
C11orf21	37.4767	-1.93883	0.480369	-4.03612	5.43433e-05	0.00309653
TRAV21	2.6381	-1.93467	0.867456	-2.23027	0.0257292	0.136288
PBX1	629.176	-1.93418	0.552624	-3.5	0.000465259	0.0120085
CBLN4	18.9466	-1.93297	0.764073	-2.52982	0.011412	0.0845236
TRBV7-6	1.40636	-1.92992	0.809324	-2.38461	0.0170972	0.107331
C18orf42	1.91929	-1.92767	0.852997	-2.25988	0.0238285	0.130483
ANKUB1	1.53424	-1.92364	0.825213	-2.33108	0.0197491	0.11698
TRBV5-6	1.7647	-1.9231	0.970823	-1.98089	0.0476031	0.196074
C9	31038.6	-1.91405	0.929464	-2.05931	0.0394647	0.174178
AREG	95.52	-1.90818	0.726779	-2.62553	0.00865137	0.0715465
TDRD15	27.5358	-1.90579	0.771916	-2.46891	0.0135527	0.0938664
HTRA4	12.4715	-1.90116	0.927625	-2.04949	0.0404144	0.176751
EPSTI1	626.226	-1.8951	0.441381	-4.29356	1.75828e-05	0.00149328
UGT2B17	340.505	-1.88947	0.745384	-2.5349	0.0112479	0.0837958
PACRG	94.0972	-1.88946	0.616262	-3.066	0.00216941	0.0315076
PYHIN1	57.0387	-1.88503	0.482246	-3.90886	9.27329e-05	0.00432956
SLC6A4	9.73088	-1.88032	0.576818	-3.25981	0.00111486	0.0207553
ADH4	43515.6	-1.87258	0.778812	-2.40441	0.0161986	0.103529
TRAV1-2	4.65945	-1.86844	0.910859	-2.05129	0.0402387	0.17623
IL12B	3.42948	-1.86592	0.743993	-2.50799	0.0121421	0.0878162
THEMIS	32.6418	-1.86119	0.50366	-3.69534	0.000219591	0.00746654
KNDC1	667.432	-1.86089	0.930563	-1.99974	0.045528	0.190519
PHOSPHO1	15.3931	-1.86042	0.442361	-4.20567	2.60314e-05	0.00194482
PKP1	10.1035	-1.85869	0.652851	-2.84703	0.00441291	0.0476418
SPIRE1	217.131	-1.85727	0.523277	-3.5493	0.000386261	0.0105984
KDM8	1072.15	-1.85329	0.498236	-3.71971	0.000199454	0.00703689
AC104809.3	14.141	-1.85117	0.695695	-2.66089	0.0077935	0.066845
DEFB132	51.1432	-1.8469	0.745504	-2.47738	0.0132349	0.0925303
IFI44	1115.15	-1.84644	0.496558	-3.71848	0.000200424	0.00705043
NME5	17.4156	-1.83716	0.715723	-2.56686	0.0102624	0.0796823
CSAD	1562.07	-1.83508	0.365187	-5.02503	5.03353e-07	0.000124809
C4BPA	66229.5	-1.83473	0.48542	-3.77967	0.000157034	0.00609671
TRBV7-3	2.18419	-1.82878	0.870804	-2.10011	0.0357195	0.165254
TMED6	167.975	-1.82168	0.542542	-3.35768	0.000786001	0.0167462
FAM13A	824.43	-1.82107	0.445496	-4.08773	4.35609e-05	0.00267276
TRAV13-2	2.58831	-1.81961	0.598531	-3.04012	0.00236484	0.0331857
PRODH	1552.88	-1.8079	0.83253	-2.17157	0.0298882	0.148194
CXCL13	72.1127	-1.80382	0.765339	-2.35689	0.0184286	0.111968
ATP10A	219.685	-1.80381	0.671282	-2.68712	0.00720714	0.0638868
NRXN3	112.262	-1.80183	0.730683	-2.46596	0.0136648	0.0943521
TAL1	117.853	-1.79928	0.471603	-3.81525	0.000136047	0.00556512
AC104650.2	1.12489	-1.79862	0.864026	-2.08167	0.0373722	0.169386
FAM83A	87.3712	-1.79647	0.795218	-2.25909	0.0238781	0.130554
IQCH	160.804	-1.7905	0.610096	-2.93478	0.00333788	0.0405801
CCR2	83.7447	-1.78885	0.512142	-3.49289	0.000477829	0.0121397
HERC5	577.165	-1.78713	0.471002	-3.79432	0.000148051	0.00585476
LGI1	2.30111	-1.78236	0.754059	-2.36368	0.0180944	0.11067
KIAA1456	137.622	-1.78096	0.658675	-2.70385	0.00685416	0.062274
SLC17A2	1656.07	-1.77701	0.536719	-3.31087	0.000930058	0.0185336
CYP4B1	5.49331	-1.77658	0.615503	-2.88638	0.00389703	0.0445839
DYNLRB2	13.4464	-1.77652	0.573526	-3.09753	0.00195137	0.0295431
SLFN12L	23.254	-1.77447	0.471053	-3.76703	0.000165204	0.00625655
IRF4	30.2622	-1.77194	0.507808	-3.48938	0.000484143	0.0121959
PRKAR2B	85.8219	-1.77147	0.587958	-3.01292	0.00258748	0.0351563
FNDC9	1.91417	-1.76659	0.766681	-2.3042	0.0212113	0.121915
HIST1H2AG	216.783	-1.76646	0.785205	-2.24968	0.0244692	0.132432
HERC6	457.368	-1.7553	0.355088	-4.94328	7.68201e-07	0.000163106
C3orf36	8.70455	-1.75346	0.634796	-2.76224	0.0057407	0.0558263
IPCEF1	50.9417	-1.74529	0.409704	-4.25988	2.04537e-05	0.00165228
ALPL	2748.82	-1.7428	0.524102	-3.32532	0.000883184	0.0180018
ENPEP	3109.79	-1.74043	0.47523	-3.6623	0.000249962	0.00803258
PARP15	98.1075	-1.73853	0.527806	-3.29389	0.000988127	0.0193017
EVA1C	418.508	-1.7384	0.564526	-3.07941	0.00207414	0.0308526
VSIG2	78.6733	-1.73678	0.626674	-2.77143	0.00558112	0.0550245
TIGIT	142.037	-1.73534	0.592809	-2.92731	0.00341904	0.0411845
FNDC5	1428.83	-1.73472	0.79312	-2.18721	0.0287274	0.145142
HLA-DRB5	4858.67	-1.73463	0.465884	-3.72331	0.00019663	0.0069998
ZFAND5	17010.1	-1.73316	0.378918	-4.57399	4.78525e-06	0.000584554
CRTAM	23.2663	-1.73291	0.520735	-3.32782	0.000875298	0.0178692
OAS2	1848.43	-1.73283	0.448021	-3.86774	0.000109851	0.00489446
GP5	7.14057	-1.7326	0.782894	-2.21307	0.0268929	0.139821
MDFIC	747.188	-1.73219	0.393116	-4.40632	1.05144e-05	0.00101364
IRX6	4.95645	-1.7286	0.853449	-2.02543	0.0428235	0.183023
PNMA5	4.41975	-1.72774	0.8534	-2.02454	0.0429147	0.183282
NLGN4X	64.3027	-1.7235	0.573094	-3.00735	0.00263535	0.0352864
CHI3L1	26165.8	-1.7183	0.788632	-2.17883	0.0293442	0.146774
SGK1	3673.38	-1.71664	0.452061	-3.79737	0.000146241	0.00582188
C9orf152	165.203	-1.7153	0.778959	-2.20204	0.0276628	0.141731
XCR1	29.6247	-1.71527	0.614558	-2.79106	0.00525355	0.0529662
TACSTD2	142.712	-1.71465	0.777561	-2.20516	0.0274427	0.141078
RSPO3	20.4614	-1.7114	0.645735	-2.65031	0.00804184	0.068136
PTPRC	794.238	-1.7059	0.406553	-4.196	2.71665e-05	0.00198112
KCNV2	1.76061	-1.70409	0.814419	-2.09241	0.0364023	0.166855
ADD2	28.5194	-1.69715	0.677376	-2.50547	0.0122288	0.0882527
TNFRSF19	556.729	-1.69681	0.809378	-2.09643	0.0360436	0.16594
RP11-295D4.3	39.7372	-1.69572	0.526361	-3.22159	0.00127481	0.0227591
IL21R	50.3408	-1.68774	0.573067	-2.94511	0.00322844	0.0399578
PRR33	14.5092	-1.68555	0.542557	-3.10667	0.00189206	0.0289656
UGT2B7	18027.8	-1.68453	0.593961	-2.8361	0.00456684	0.0486149
FBXO2	1858.92	-1.68011	0.420192	-3.99842	6.37669e-05	0.0034563
SOX7	247.037	-1.67917	0.449648	-3.73442	0.000188149	0.0068204
SLC16A12	275.627	-1.67362	0.769578	-2.17472	0.0296508	0.147469
PPBP	3.36962	-1.67357	0.581526	-2.8779	0.00400335	0.0451611
BAAT	46945.1	-1.6731	0.356129	-4.69801	2.62709e-06	0.000390452
NR4A2	618.943	-1.67191	0.480139	-3.48215	0.000497405	0.0124327
TRAT1	22.9477	-1.67134	0.514564	-3.24808	0.00116188	0.0214072
CD160	33.1076	-1.66902	0.48988	-3.407	0.000656805	0.0148845
UBASH3A	36.7985	-1.66751	0.474376	-3.51517	0.000439474	0.0115934
SERTAD4	21.1803	-1.66464	0.635218	-2.62058	0.00877795	0.0720474
GZMB	72.1304	-1.66436	0.458392	-3.63086	0.000282474	0.00877688
CD226	72.8199	-1.66434	0.409024	-4.06906	4.7204e-05	0.00281566
FAM65B	198.111	-1.66274	0.4398	-3.78067	0.000156409	0.00609671
TRAV29DV5	3.45668	-1.66223	0.697306	-2.38379	0.0171356	0.107383
LCN6	3.29299	-1.65999	0.835389	-1.98709	0.0469126	0.194488
DIRAS3	49.9067	-1.65955	0.619072	-2.6807	0.00734687	0.0646111
IFI44L	561.29	-1.65609	0.60621	-2.73188	0.00629748	0.0590513
CR1	45.2097	-1.65342	0.41867	-3.9492	7.84113e-05	0.00388463
P2RX1	31.7799	-1.65173	0.507355	-3.25558	0.00113163	0.020958
HEATR9	3.82407	-1.64893	0.645003	-2.55647	0.0105739	0.0808688
TRGV5	12.4386	-1.64354	0.551406	-2.98064	0.0028765	0.0371756
TBX21	41.7337	-1.64186	0.438023	-3.74833	0.000178013	0.00657321
TRBV5-4	2.69894	-1.63737	0.674851	-2.42627	0.015255	0.0999902
RLTPR	62.062	-1.63485	0.424778	-3.84873	0.000118734	0.00511501
PBLD	4718.5	-1.63462	0.465153	-3.51415	0.000441161	0.0116049
DNAH5	201.587	-1.63425	0.685805	-2.38296	0.017174	0.107478
TSPAN32	37.0713	-1.63406	0.411335	-3.97257	7.11016e-05	0.00366582
TRBV19	7.90157	-1.63077	0.63344	-2.57447	0.0100393	0.0783938
RP11-641J8.1	1.69203	-1.63009	0.732612	-2.22504	0.0260784	0.13724
CMPK2	459.462	-1.62954	0.420319	-3.8769	0.000105797	0.00476487
IKZF3	306.732	-1.62916	0.530979	-3.06823	0.00215334	0.0314655
SEMA3B	1010.42	-1.62546	0.625567	-2.59838	0.00936647	0.0751824
SERPINA3	978.892	-1.62493	0.531793	-3.05557	0.00224632	0.032231
SEC14L3	70.1357	-1.62332	0.737571	-2.2009	0.0277434	0.141866
SPIC	8.1999	-1.62209	0.54964	-2.95119	0.00316551	0.0394252
ZAP70	179.181	-1.62065	0.437216	-3.70676	0.000209931	0.00723398
NUGGC	1161.09	-1.62017	0.61825	-2.62057	0.00877819	0.0720474
CTH	6700.26	-1.61883	0.579647	-2.79278	0.00522572	0.0527469
FCRL6	33.9451	-1.61752	0.418944	-3.86096	0.000112944	0.00494927
TRAV8-3	2.901	-1.61305	0.785907	-2.05247	0.0401244	0.176045
MPPED2	77.1884	-1.61181	0.548442	-2.93888	0.00329401	0.0402388
TRIM22	1539.16	-1.6067	0.388188	-4.13896	3.48885e-05	0.00235696
SYTL5	156.422	-1.60613	0.694815	-2.3116	0.0208	0.120856
YPEL1	169.145	-1.60543	0.489091	-3.28247	0.00102903	0.0196287
CXCR6	159.365	-1.60454	0.499886	-3.20981	0.00132824	0.0233262
MCOLN2	37.9042	-1.60264	0.620541	-2.58265	0.00980435	0.0770311
RP11-325I22.3	5.18597	-1.60091	0.511315	-3.13097	0.00174231	0.0273369
TRAV4	5.2927	-1.59862	0.708219	-2.25724	0.0239929	0.130942
SIRPG	61.9216	-1.5978	0.573232	-2.78736	0.00531395	0.0533039
FOXC1	243.995	-1.59765	0.573827	-2.78421	0.00536587	0.053703
AC093642.1	5.87107	-1.59661	0.790785	-2.01902	0.0434847	0.184888
MX1	3779.47	-1.59591	0.477574	-3.3417	0.000832678	0.0173235
IGFALS	870.602	-1.59244	0.710835	-2.24024	0.0250751	0.1345
PTPN22	65.8747	-1.59093	0.433382	-3.67096	0.00024164	0.00787686
C8orf4	2184.8	-1.5907	0.452239	-3.51738	0.000435827	0.0115326
PIK3CG	66.5026	-1.59032	0.447848	-3.55103	0.000383726	0.0105613
IL18RAP	42.6935	-1.58779	0.403265	-3.93735	8.2388e-05	0.00400379
FASLG	24.3644	-1.58732	0.526886	-3.01264	0.00258989	0.0351563
TNNT3	6.39064	-1.58277	0.613605	-2.57947	0.00989527	0.0775405
IGF1	543.664	-1.58222	0.574892	-2.75221	0.00591949	0.0570054
SERPINA7	9628.97	-1.5813	0.651967	-2.42542	0.0152905	0.0999988
RSAD2	319.587	-1.57802	0.454284	-3.47365	0.000513437	0.012648
IGSF10	16.6788	-1.57636	0.545743	-2.88846	0.00387128	0.0444014
AKAP5	82.857	-1.57505	0.410515	-3.83677	0.000124664	0.00525621
EMR1	32.1432	-1.57207	0.434787	-3.61571	0.000299521	0.00906954
ABHD1	208.66	-1.56997	0.485646	-3.23275	0.00122603	0.0220871
STAP1	8.74219	-1.56209	0.685074	-2.28017	0.0225974	0.126353
CYS1	73.9768	-1.56139	0.78149	-1.99796	0.0457211	0.191103
TG	27.3545	-1.559	0.465427	-3.34961	0.000809264	0.0170113
TRBV20-1	12.5996	-1.55842	0.550332	-2.83179	0.00462887	0.0489656
FCRL1	3.83346	-1.5584	0.636245	-2.44938	0.0143104	0.0969615
TRGV2	2.60428	-1.55786	0.783399	-1.9886	0.0467459	0.193977
HBA2	254.348	-1.55685	0.593133	-2.6248	0.00867007	0.0715465
GCK	46.1526	-1.55612	0.767061	-2.02867	0.0424917	0.182129
STARD5	330.046	-1.55548	0.373137	-4.16866	3.06399e-05	0.00215993
EPB41L4B	3452.71	-1.5546	0.440435	-3.52969	0.000416054	0.0112089
GZMK	87.8384	-1.55337	0.45539	-3.41108	0.000647066	0.0147576
ADH1A	25196.5	-1.55325	0.60095	-2.58466	0.00974757	0.0767201
KRTAP5-8	1.51101	-1.55325	0.711902	-2.18183	0.029122	0.14625
ICOS	35.2199	-1.55321	0.617219	-2.51647	0.0118538	0.0863588
ZMAT1	363.797	-1.55118	0.457407	-3.39125	0.000695747	0.0155001
SLC30A2	23.8443	-1.5505	0.705799	-2.19681	0.0280341	0.142761
TNFRSF13C	22.7746	-1.55012	0.465076	-3.33305	0.000859003	0.0177113
GC	147699	-1.54677	0.320752	-4.82233	1.41889e-06	0.000255811
IFIT1	2429.09	-1.54646	0.518345	-2.98345	0.00285014	0.036939
ZNF385B	587.798	-1.54489	0.504581	-3.06173	0.00220063	0.0318056
HP	575841	-1.54469	0.557239	-2.77204	0.00557063	0.0549818
PCBP3	33.8413	-1.54448	0.695096	-2.22197	0.0262856	0.137822
KCNMA1	606.378	-1.5434	0.571621	-2.70003	0.00693325	0.0625395
GP1BA	47.3711	-1.54335	0.4828	-3.19667	0.00139024	0.0239103
EGR3	76.4553	-1.53994	0.496535	-3.10136	0.00192631	0.0293389
IL2RB	412.583	-1.53954	0.428069	-3.59648	0.000322551	0.00944614
PLCXD3	59.3717	-1.5381	0.737105	-2.08668	0.0369174	0.168266
SSTR1	374.515	-1.53572	0.682093	-2.25147	0.0243555	0.131981
IL7R	331.663	-1.53342	0.540955	-2.83466	0.00458744	0.0487586
FPR2	12.8961	-1.53342	0.48101	-3.18793	0.00143297	0.0243137
RP11-417L19.5	6.88935	-1.53239	0.561636	-2.72844	0.00636341	0.0592027
RP11-21K12.2	8.20034	-1.53123	0.711589	-2.15185	0.0314093	0.153182
TAGAP	103.448	-1.5311	0.375718	-4.07514	4.59863e-05	0.00276481
IL5RA	3.5456	-1.52915	0.773377	-1.97724	0.0480151	0.196771
CFI	24139.3	-1.5288	0.371625	-4.11384	3.89137e-05	0.00249188
ALB	2.96402e+06	-1.52814	0.470719	-3.24639	0.00116877	0.0214456
CYP2C8	17314.9	-1.52625	0.61672	-2.47478	0.0133319	0.092953
FAM65C	97.3002	-1.52458	0.578462	-2.63557	0.0083996	0.0701015
RP11-361L15.5	10.9526	-1.52115	0.702071	-2.16666	0.0302605	0.1495
GBP6	6.90961	-1.51751	0.68136	-2.22717	0.0259358	0.136813
WNT9B	4.65923	-1.51421	0.667284	-2.26922	0.0232552	0.128515
ISM1	213.474	-1.5128	0.561945	-2.69208	0.00710083	0.06329
PABPC5	9.56093	-1.51275	0.581787	-2.60018	0.00931739	0.0750229
SPG20	430.668	-1.51197	0.484142	-3.12298	0.00179028	0.0279105
SIT1	51.47	-1.51117	0.543473	-2.78058	0.00542625	0.0541562
ACKR1	75.1051	-1.51004	0.724084	-2.08545	0.0370283	0.168555
TRBV5-1	5.6824	-1.50778	0.621504	-2.42601	0.0152657	0.0999988
CCR7	79.3763	-1.49448	0.48646	-3.07216	0.00212516	0.0312466
TRAF3IP3	122.125	-1.49023	0.409888	-3.6357	0.000277223	0.00865896
RIPPLY1	135.986	-1.49023	0.69095	-2.15679	0.0310223	0.151959
HRNR	3.00298	-1.48708	0.743864	-1.99913	0.0455943	0.190752
RGMB	332.257	-1.48699	0.422397	-3.52037	0.000430943	0.0114714
DDX60	1306.93	-1.48649	0.40819	-3.64166	0.000270881	0.00850557
CD8B	74.1082	-1.48575	0.631865	-2.35137	0.0187044	0.112967
RGS16	449.482	-1.48482	0.49408	-3.00523	0.00265376	0.0354
TRAV12-3	2.25174	-1.48389	0.721774	-2.05589	0.0397933	0.175151
FXYD1	1100.67	-1.48282	0.73742	-2.01082	0.0443441	0.187279
GOLGA8R	9.14638	-1.48146	0.615665	-2.40627	0.0161163	0.103224
FGF2	275.586	-1.48121	0.696692	-2.12606	0.0334986	0.159148
ETNPPL	7164.37	-1.48105	0.718257	-2.06201	0.039207	0.173556
CTF1	48.6167	-1.4805	0.557477	-2.65571	0.00791421	0.0675036
ECM2	1514.29	-1.47976	0.365538	-4.04818	5.16173e-05	0.00297927
CREB3L3	12327.4	-1.47558	0.340231	-4.33699	1.44449e-05	0.0012695
ACSM3	2595.06	-1.47518	0.593195	-2.48683	0.0128887	0.0910016
ANGPTL1	322.088	-1.47512	0.609473	-2.42032	0.015507	0.100643
FAT2	7.57928	-1.47139	0.52614	-2.79657	0.00516478	0.0523374
MAP3K5	1354.95	-1.46379	0.496863	-2.94606	0.00321847	0.0398621
BHLHA15	104.604	-1.4616	0.705138	-2.07279	0.0381916	0.171228
CXCR3	74.0704	-1.45902	0.52615	-2.77301	0.00555397	0.0548782
CXCL2	3049.6	-1.45768	0.559951	-2.60323	0.00923512	0.0745287
PKD1L3	21.6521	-1.4566	0.596797	-2.4407	0.0146587	0.097963
ADRBK2	1045.98	-1.45358	0.627874	-2.31508	0.0206084	0.120027
ITGAD	55.5355	-1.45358	0.490389	-2.96413	0.00303538	0.0384489
P2RY12	9.08349	-1.4513	0.485869	-2.98702	0.00281711	0.0366471
FABP4	1100.13	-1.44916	0.668111	-2.16904	0.0300794	0.148894
CCDC170	430.619	-1.44526	0.51969	-2.781	0.00541924	0.0541165
MTHFD1	16572.7	-1.44475	0.382666	-3.77548	0.000159702	0.00610892
SCNN1A	626.012	-1.43931	0.552555	-2.60484	0.00919183	0.0743337
PDZD2	209.505	-1.43827	0.54989	-2.61556	0.0089081	0.0726788
KCNA3	8.75012	-1.43801	0.527313	-2.72706	0.00639024	0.0593902
SLC25A25	6573.58	-1.43796	0.363769	-3.95293	7.71992e-05	0.00388463
IKZF1	231.092	-1.43541	0.392983	-3.65261	0.000259592	0.00825786
UNC45B	3.4348	-1.43058	0.514386	-2.78115	0.00541666	0.0541165
DNASE1L3	874.007	-1.429	0.514633	-2.77673	0.00549083	0.0544352
DAPP1	50.6801	-1.42898	0.415144	-3.44212	0.000577176	0.0136344
PLG	84272.4	-1.42881	0.473062	-3.02035	0.00252485	0.0346123
SULT2A1	33466.3	-1.42648	0.523764	-2.72352	0.00645905	0.0597495
AC010547.9	1.92126	-1.42601	0.565734	-2.52063	0.0117144	0.0858367
HCN2	33.7706	-1.42463	0.60166	-2.36784	0.0178924	0.110039
CYP1B1	870.226	-1.42453	0.474595	-3.00157	0.0026859	0.0355779
CAMK1G	15.7419	-1.4218	0.575249	-2.47163	0.0134497	0.0933005
TIFAB	14.891	-1.4209	0.607406	-2.33929	0.0193205	0.115411
CD3G	65.951	-1.41886	0.497503	-2.85195	0.00434519	0.0472457
CD69	125.871	-1.41696	0.449485	-3.1524	0.00161932	0.0261363
IL10	12.2814	-1.41667	0.425545	-3.32907	0.000871353	0.0178396
LCNL1	2.68988	-1.41582	0.707659	-2.00071	0.0454234	0.190304
PPP1R3G	1896.51	-1.41453	0.656762	-2.1538	0.0312558	0.152684
NCR1	10.3823	-1.41349	0.556839	-2.53842	0.0111355	0.0833058
FAM179A	19.7374	-1.41302	0.530694	-2.66258	0.00775435	0.066621
GLUL	150647	-1.4129	0.685144	-2.0622	0.0391889	0.173519
SUMO4	5.37977	-1.41224	0.497971	-2.83598	0.00456847	0.0486149
TESPA1	44.8684	-1.41072	0.438675	-3.21585	0.00130058	0.0230412
P2RY13	87.9517	-1.40992	0.346461	-4.0695	4.71146e-05	0.00281566
ISG15	5023.35	-1.40867	0.568352	-2.47852	0.013193	0.092273
DPY19L2	10.8368	-1.40805	0.581888	-2.4198	0.0155289	0.100675
TLR8	58.2059	-1.40619	0.443798	-3.16854	0.00153206	0.0251837
MROH7	22.2634	-1.40465	0.605994	-2.31792	0.0204536	0.11976
TMC8	321.483	-1.40386	0.330364	-4.24943	2.14317e-05	0.00171405
DOCK8	576.791	-1.40302	0.47151	-2.97558	0.00292434	0.0376484
C16orf54	58.8907	-1.40228	0.458321	-3.0596	0.00221633	0.0319549
PRKCB	184.895	-1.40116	0.372574	-3.76075	0.000169407	0.00636395
SNED1	603.819	-1.39953	0.392014	-3.57009	0.000356858	0.00999148
SPN	167.364	-1.39717	0.392383	-3.56074	0.000369805	0.0102893
SLAMF9	43.1296	-1.39674	0.53735	-2.59931	0.00934114	0.0750785
PTCHD4	96.6893	-1.39404	0.639068	-2.18136	0.0291565	0.146357
SLFNL1	17.8553	-1.38907	0.495816	-2.80158	0.00508522	0.0518553
RASGEF1B	1089.45	-1.38494	0.384718	-3.59989	0.000318352	0.00938344
P2RY14	42.0489	-1.38257	0.392637	-3.52125	0.000429515	0.0114505
MMP24	161.074	-1.38239	0.502375	-2.75171	0.00592842	0.0570606
GOLGA8M	20.9308	-1.37985	0.549678	-2.51028	0.0120636	0.0873901
CCL2	608.873	-1.3798	0.497127	-2.77555	0.00551087	0.0544824
ZNF80	2.03204	-1.37908	0.690777	-1.99641	0.0458888	0.191483
PNPLA7	581.366	-1.37766	0.357908	-3.84919	0.000118508	0.00511501
CCL4	220.159	-1.37718	0.421981	-3.2636	0.00110007	0.0205703
ITGA4	178.671	-1.37268	0.442723	-3.10055	0.00193164	0.0293698
LAMA3	1798.96	-1.37237	0.660037	-2.07923	0.0375959	0.170097
GPHN	1554.34	-1.37173	0.301697	-4.54673	5.44866e-06	0.00064666
TBX3	3315.44	-1.37149	0.697351	-1.96672	0.0492156	0.199991
CCL8	53.0802	-1.37036	0.365694	-3.74728	0.000178763	0.00658728
CD3E	357.277	-1.36904	0.469688	-2.91479	0.00355925	0.042095
TFEC	88.3912	-1.36711	0.343465	-3.98034	6.88179e-05	0.00360991
ANKRD53	21.9298	-1.36536	0.556209	-2.45475	0.0140981	0.0960792
KCNQ5	4.34813	-1.36485	0.629524	-2.16806	0.0301539	0.149098
ADH6	12238.6	-1.36438	0.454342	-3.00299	0.00267341	0.0355028
MAP4K1	180.24	-1.36414	0.380649	-3.58371	0.000338747	0.00968199
TPRG1	207.149	-1.36388	0.488167	-2.79389	0.00520784	0.0526243
FAIM3	134.342	-1.36215	0.37048	-3.67672	0.000236248	0.00784633
C8A	15350.4	-1.36188	0.484834	-2.80896	0.00497023	0.0511762
UBXN10	1095.18	-1.35996	0.613546	-2.21656	0.0266529	0.139114
MBL2	5998.78	-1.35905	0.687676	-1.9763	0.0481211	0.19707
GADD45B	7801.47	-1.35523	0.434288	-3.12057	0.00180504	0.028067
CLEC9A	12.3504	-1.35397	0.452447	-2.99255	0.00276655	0.0362804
ANXA10	1118.82	-1.35249	0.596664	-2.26675	0.0234053	0.129025
SFMBT2	166.317	-1.35175	0.368704	-3.66622	0.000246158	0.00793891
GPR174	6.44913	-1.35153	0.651392	-2.07484	0.0380015	0.170892
FHL5	23.1122	-1.35041	0.579052	-2.33211	0.0196947	0.116735
PRKCQ	41.7084	-1.34935	0.454285	-2.97028	0.00297526	0.0379596
HS3ST2	99.1765	-1.34819	0.51064	-2.64019	0.00828593	0.0694453
APLP1	93.5634	-1.34783	0.651048	-2.07025	0.0384292	0.171799
GSTZ1	2839.82	-1.34746	0.417108	-3.23047	0.00123585	0.0221967
TRBV3-1	3.49897	-1.34378	0.667234	-2.01395	0.0440143	0.186441
GPR18	14.7641	-1.34167	0.464864	-2.88616	0.00389969	0.0445839
CLEC12A	36.89	-1.339	0.468673	-2.857	0.00427667	0.0467367
CTD-2527I21.5	15.4142	-1.33745	0.65103	-2.05437	0.0399401	0.175494
APOBEC3A	14.2149	-1.33743	0.51412	-2.6014	0.00928452	0.0748258
STPG2	4.45534	-1.33433	0.645895	-2.06586	0.0388415	0.172516
IL1R1	4816.5	-1.33369	0.339018	-3.93397	8.35535e-05	0.00403842
FLRT3	809.535	-1.33247	0.583766	-2.28253	0.0224578	0.125757
IL6ST	74.1474	-1.3318	0.462458	-2.87983	0.00397896	0.0450099
CST7	185.812	-1.33042	0.44918	-2.96189	0.00305759	0.0385659
FMO2	161.739	-1.32914	0.512171	-2.59511	0.00945595	0.0756264
PHLDA1	3446.35	-1.32895	0.459157	-2.89431	0.00379989	0.0439786
FAM19A1	2.34107	-1.32875	0.608891	-2.18224	0.0290916	0.146247
PIP5K1B	20.7072	-1.32819	0.494759	-2.68451	0.00726352	0.0641687
GRAMD4	5840.44	-1.32732	0.492187	-2.69678	0.00700132	0.062748
CD5	113.255	-1.32709	0.457788	-2.89893	0.00374443	0.0436769
HSD17B6	28949.3	-1.32659	0.420571	-3.15426	0.00160907	0.0260652
GPR141	5.30245	-1.3221	0.598195	-2.21015	0.0270944	0.140148
AFM	8816.34	-1.32181	0.570663	-2.31627	0.0205433	0.119892
RP11-331F4.5	7.30698	-1.32053	0.463145	-2.85123	0.004355	0.0472855
CD244	43.732	-1.31997	0.486738	-2.71187	0.0066904	0.0612228
RP13-554M15.2	8.94783	-1.31921	0.593726	-2.22191	0.0262894	0.137822
RAB3D	315.666	-1.31901	0.632762	-2.08453	0.0371116	0.168762
FYB	386.827	-1.31752	0.396673	-3.32143	0.000895569	0.0181223
MTRNR2L6	4.14798	-1.31729	0.544453	-2.41948	0.0155426	0.100728
ABI3BP	195.563	-1.31527	0.589021	-2.23297	0.0255506	0.135826
CYTIP	185.603	-1.31484	0.449493	-2.92515	0.00344292	0.041322
LILRB5	398.376	-1.31461	0.301946	-4.35378	1.33809e-05	0.00119324
PLIN4	2341.57	-1.3143	0.430987	-3.04951	0.00229213	0.0325483
CYFIP2	4590.14	-1.3139	0.57325	-2.29202	0.0219042	0.123941
MERTK	1314.48	-1.3137	0.443317	-2.96336	0.00304304	0.038464
RP11-903H12.5	68.9193	-1.31243	0.350619	-3.7432	0.000181695	0.00666697
PPP1R3B	4932.58	-1.31186	0.374304	-3.50481	0.000456939	0.0118625
GADD45G	4585.96	-1.31156	0.491986	-2.66586	0.00767927	0.0662922
HPX	146373	-1.31021	0.426223	-3.07401	0.00211205	0.0311975
ANGPTL4	7702.12	-1.30968	0.507503	-2.58063	0.00986206	0.0773822
GNA14	105.506	-1.30906	0.413937	-3.16247	0.00156439	0.0255737
ACAP1	262.515	-1.30881	0.354526	-3.6917	0.000222759	0.00751021
AGXT2	3799.11	-1.30722	0.65352	-2.00028	0.0454702	0.190456
ITM2A	298.355	-1.30636	0.37373	-3.49547	0.000473223	0.0120916
BANK1	13.1551	-1.30535	0.459618	-2.84007	0.00451034	0.0482266
FXYD7	3.70417	-1.30428	0.630195	-2.06965	0.0384851	0.171826
ACSL5	7793.24	-1.30319	0.452558	-2.87961	0.00398171	0.0450099
GPR128	258.126	-1.30174	0.581978	-2.23676	0.0253022	0.134867
BCL11B	68.7413	-1.30113	0.496732	-2.61938	0.00880892	0.0721644
ELFN1	735.125	-1.30104	0.609155	-2.13581	0.0326947	0.1572
CCR4	24.7091	-1.30101	0.533075	-2.44057	0.014664	0.097963
NKG7	344.286	-1.3005	0.493884	-2.6332	0.00845843	0.0705076
SYNE1	1335.42	-1.29986	0.321464	-4.04356	5.26448e-05	0.00302877
PRF1	378.525	-1.29985	0.481284	-2.70079	0.00691754	0.0625395
IL24	29.182	-1.29932	0.485972	-2.67364	0.00750327	0.0652246
ZNRF3	15.6434	-1.29843	0.636475	-2.04003	0.0413472	0.179118
SSPN	83.7982	-1.29348	0.584137	-2.21435	0.0268049	0.139622
CCR5	132.236	-1.29262	0.436521	-2.9612	0.00306446	0.0385979
ORM1	150706	-1.29225	0.460223	-2.80789	0.00498677	0.0511762
IGFBP1	54593.7	-1.28841	0.578547	-2.22697	0.0259495	0.136845
TSC22D3	6114.68	-1.28696	0.447834	-2.87373	0.00405652	0.0455019
ERICH6B	8.32267	-1.28695	0.450199	-2.85862	0.00425488	0.0465657
APOA5	13364.5	-1.28639	0.546447	-2.35411	0.0185674	0.112254
RP11-400G3.5	11.1279	-1.28575	0.634407	-2.02669	0.042694	0.182689
RP11-106M3.2	14.1024	-1.28423	0.642159	-1.99987	0.0455145	0.190507
LCK	207.632	-1.2827	0.445901	-2.87664	0.00401938	0.0452561
DNAAF3	19.4977	-1.28229	0.516712	-2.48162	0.0130786	0.0917687
PTGER2	36.0925	-1.28112	0.378527	-3.38449	0.000713093	0.015683
POU3F1	2.99358	-1.28096	0.63191	-2.02713	0.0426496	0.18263
PALM2-AKAP2	25.5157	-1.27981	0.549676	-2.32829	0.0198966	0.117537
CYP2D6	9431.89	-1.27916	0.484835	-2.63835	0.00833108	0.0696274
C10orf128	263.68	-1.27593	0.384006	-3.32267	0.000891587	0.018111
GLYATL1	5152.42	-1.27277	0.484885	-2.62489	0.00866776	0.0715465
FAM129C	13.1772	-1.27217	0.511085	-2.48917	0.0128043	0.0905896
TRBV25-1	7.75545	-1.27179	0.507753	-2.50474	0.012254	0.0882527
AD000671.6	2.28153	-1.27059	0.616575	-2.06072	0.0393296	0.17384
SLC25A34	175.526	-1.26955	0.535342	-2.37147	0.0177175	0.109336
CASP5	5.11317	-1.2674	0.539691	-2.34838	0.0188552	0.113456
KLF10	3095.84	-1.26422	0.410158	-3.08227	0.00205428	0.0306473
GABARAPL1	6044.52	-1.26266	0.336261	-3.75499	0.00017335	0.00642765
CD2	267.81	-1.26247	0.483966	-2.6086	0.00909125	0.0736342
ATOH8	957.704	-1.26126	0.64031	-1.96977	0.0488651	0.199202
GDF6	14.1359	-1.2606	0.521084	-2.41918	0.0155555	0.100774
KCNJ5	179.694	-1.25896	0.39431	-3.19283	0.00140888	0.0241377
ALDOB	324904	-1.25755	0.597193	-2.10577	0.035224	0.163769
UGT2B15	15994.6	-1.25533	0.497851	-2.52151	0.0116853	0.085694
UGT2A3	916.893	-1.25502	0.616668	-2.03517	0.0418343	0.18052
ALDH8A1	5266.03	-1.25442	0.525444	-2.38734	0.0169706	0.106838
GBP1	3064.43	-1.2539	0.358428	-3.49833	0.000468188	0.0120667
RRH	4.05591	-1.25221	0.480017	-2.60868	0.0090893	0.0736342
EML6	210.639	-1.25188	0.522329	-2.39673	0.0165421	0.104917
HAO1	11518.5	-1.24974	0.375159	-3.33122	0.000864673	0.0177871
FMO3	23143.7	-1.24902	0.49349	-2.531	0.0113739	0.0843815
MAMDC4	1735.02	-1.24861	0.622004	-2.00739	0.0447079	0.188324
RND3	2024.29	-1.24798	0.445443	-2.80166	0.00508411	0.0518553
PDE4B	583.597	-1.24745	0.444423	-2.80691	0.00500192	0.0512696
ERMN	6.55502	-1.2468	0.602741	-2.06855	0.0385882	0.172141
LIPG	2613.74	-1.24661	0.400905	-3.10949	0.0018741	0.0287716
AMACR	2176.74	-1.2456	0.539413	-2.30917	0.0209342	0.121104
CES5A	134.789	-1.24397	0.623089	-1.99646	0.0458841	0.191483
FOXO1	1979.44	-1.24358	0.446557	-2.78482	0.00535567	0.0536319
TCP11	6.88369	-1.24186	0.46563	-2.66705	0.007652	0.0661209
MRO	136.084	-1.23974	0.451662	-2.74484	0.00605404	0.0579697
N4BP2L1	1183.94	-1.23901	0.361315	-3.42915	0.000605466	0.014024
PLGLB2	219.419	-1.2383	0.518194	-2.38966	0.0168642	0.106318
DMRTA1	521.998	-1.23228	0.504185	-2.4441	0.0145214	0.0976951
GCSAM	14.043	-1.23162	0.471514	-2.61206	0.00899973	0.0731828
TOX	94.3601	-1.23136	0.613752	-2.00628	0.0448264	0.188734
MTHFD2L	495.046	-1.23041	0.325703	-3.77772	0.00015827	0.00609671
SLC25A30	2802.01	-1.22953	0.355912	-3.45459	0.000551135	0.013194
RP11-463O12.5	35.0481	-1.2282	0.413161	-2.9727	0.0029519	0.0378212
TAS1R3	36.1514	-1.22798	0.563733	-2.1783	0.0293837	0.146918
PRDM1	320.397	-1.22768	0.418743	-2.93181	0.00336991	0.0407749
KIAA0825	32.637	-1.2276	0.326436	-3.76062	0.000169491	0.00636395
FGF18	8.22456	-1.22544	0.541102	-2.26471	0.0235305	0.129376
RNASE4	1109.73	-1.22439	0.415473	-2.94698	0.00320897	0.0398083
USP53	446.185	-1.22132	0.249721	-4.89076	1.00446e-06	0.000201286
ALAD	11024	-1.22095	0.300332	-4.06534	4.79628e-05	0.00284191
PLGLB1	171.214	-1.22082	0.567967	-2.14946	0.0315982	0.153904
FOXP3	153.629	-1.22024	0.414661	-2.94275	0.00325312	0.040087
RMDN2	556.23	-1.21989	0.294936	-4.13613	3.53214e-05	0.00236826
ZBP1	28.022	-1.21974	0.405121	-3.01081	0.00260552	0.0352041
TTC16	7.32852	-1.21624	0.446447	-2.72426	0.00644455	0.0596463
SAMSN1	169.477	-1.21592	0.403718	-3.01181	0.00259693	0.035168
CCRN4L	390.623	-1.21572	0.458331	-2.65249	0.00798995	0.067865
NAAA	1090.55	-1.21493	0.368276	-3.29895	0.000970456	0.0191038
CELF2	269.439	-1.21388	0.330992	-3.6674	0.000245027	0.00793891
DEPDC7	1588.7	-1.21353	0.347346	-3.49371	0.000476351	0.0121367
RNF152	2180.16	-1.21153	0.337142	-3.59353	0.000326227	0.00947599
RIPK3	59.5401	-1.21056	0.342017	-3.53947	0.000400937	0.0108674
CTD-2600H12.2	25.77	-1.21005	0.491526	-2.46182	0.0138232	0.0949439
SOCS2	1144.46	-1.20877	0.460997	-2.62208	0.00873954	0.0718076
EFHD1	927.425	-1.20705	0.547647	-2.20406	0.0275198	0.141161
RCL1	2252.73	-1.20557	0.371541	-3.24478	0.00117542	0.0215012
TMPRSS5	21.5205	-1.20474	0.497066	-2.42371	0.015363	0.100292
PTCRA	7.17575	-1.20288	0.589497	-2.04052	0.0412984	0.17908
ITGB7	114.107	-1.19796	0.433736	-2.76195	0.00574572	0.0558447
ORM2	37191	-1.19711	0.427808	-2.79823	0.00513835	0.0520992
SAMD3	22.9152	-1.19698	0.333801	-3.58589	0.000335925	0.00964771
SLA	412.388	-1.19689	0.372525	-3.2129	0.00131401	0.0231803
CCL4L1	160.721	-1.19474	0.531659	-2.24718	0.0246284	0.132984
CNR2	5.42609	-1.19034	0.504113	-2.36125	0.0182136	0.11117
JSRP1	18.6184	-1.18979	0.494133	-2.40784	0.0160474	0.102939
ADAMTS10	456.421	-1.18852	0.420796	-2.82446	0.00473601	0.0496051
ANKRD37	292.792	-1.188	0.461069	-2.57663	0.00997693	0.078034
TEK	287.912	-1.18785	0.395427	-3.00397	0.00266485	0.0354801
RP3-414A15.12	60.6517	-1.18716	0.302366	-3.92624	8.62853e-05	0.00414928
CCL5	953.045	-1.18623	0.504525	-2.35119	0.0187137	0.112985
NFIL3	3008.03	-1.18494	0.316601	-3.74271	0.000182047	0.00666697
TNFRSF8	18.0648	-1.18386	0.437515	-2.70588	0.00681234	0.0619888
SLC38A5	58.2172	-1.18285	0.535635	-2.20831	0.0272226	0.140495
IL1RN	2934.97	-1.18228	0.523828	-2.257	0.0240078	0.130942
GRAMD1C	613.93	-1.18224	0.411239	-2.87483	0.0040424	0.045372
TNFSF8	40.904	-1.182	0.371012	-3.18588	0.00144316	0.0243969
FGA	808128	-1.17923	0.43636	-2.70243	0.00688344	0.0624319
CDC14B	2303.24	-1.17917	0.378989	-3.11136	0.0018623	0.0286823
WASF3	327.09	-1.17719	0.587053	-2.00526	0.0449355	0.188971
CA5B	242.88	-1.1771	0.487739	-2.41337	0.0158058	0.101988
LCAT	2664.27	-1.17695	0.566139	-2.07892	0.0376251	0.170163
LAX1	25.7284	-1.17602	0.408015	-2.88231	0.00394775	0.0449318
DOCK2	364.111	-1.17545	0.353233	-3.3277	0.000875675	0.0178692
SH2D2A	100.845	-1.17115	0.445925	-2.62634	0.00863076	0.0715286
GPR65	81.5871	-1.16884	0.344988	-3.38805	0.000703905	0.0155373
MMP21	2.70323	-1.16866	0.536749	-2.17729	0.0294591	0.14713
BAALC	158.85	-1.16846	0.522042	-2.23825	0.0252046	0.134596
TRANK1	1506.46	-1.16843	0.367709	-3.17759	0.00148503	0.0247017
CD84	259.885	-1.16703	0.336273	-3.47048	0.000519538	0.0127321
FTCD	19613	-1.16505	0.490402	-2.3757	0.0175156	0.108696
PIK3CD	311.67	-1.16363	0.353301	-3.29359	0.000989165	0.0193017
SLC1A1	2934.41	-1.16316	0.530549	-2.19238	0.0283524	0.143859
SMOC1	4257.98	-1.16314	0.344004	-3.38119	0.000721724	0.0157938
RP1L1	4.10356	-1.16226	0.590699	-1.9676	0.0491144	0.199941
RHCE	86.4444	-1.16212	0.485545	-2.39343	0.0166915	0.105534
PTPN7	186.201	-1.16138	0.432012	-2.68829	0.00718181	0.0637886
TNS4	6.14676	-1.16068	0.512441	-2.26501	0.0235122	0.129346
HLF	5697.21	-1.16019	0.515277	-2.25159	0.0243485	0.131981
MTRNR2L12	64.5454	-1.16	0.492723	-2.35427	0.0185593	0.112248
TBCK	635.841	-1.15867	0.306927	-3.77508	0.000159959	0.00610892
CYR61	2385.39	-1.15694	0.414825	-2.78899	0.00528729	0.0531864
ACAA2	21668.8	-1.15594	0.384917	-3.00309	0.00267253	0.0355028
DOCK10	262.025	-1.15485	0.372316	-3.1018	0.00192348	0.0293208
SLC5A6	6373.29	-1.15461	0.434644	-2.65644	0.00789695	0.0674467
ATP8B4	157.634	-1.15346	0.294352	-3.91863	8.90544e-05	0.00425814
FGD2	212.607	-1.15319	0.296864	-3.88457	0.000102512	0.00465966
GPR55	8.2542	-1.15231	0.39206	-2.93912	0.00329145	0.0402388
G6PC	40156.2	-1.15202	0.497548	-2.31539	0.0205917	0.120017
TXK	26.5122	-1.15076	0.426558	-2.69778	0.00698046	0.062748
SYNE2	2700.61	-1.15012	0.32777	-3.50892	0.000449933	0.0117662
CD6	164.232	-1.14988	0.482973	-2.38084	0.0172731	0.107845
RHOH	86.783	-1.14715	0.42002	-2.73119	0.00631053	0.0591023
SERPINA11	8889.26	-1.14636	0.572914	-2.00092	0.0454011	0.190256
ANG	20957.2	-1.1456	0.467202	-2.45205	0.0142044	0.0965088
CD247	151.386	-1.14534	0.396069	-2.89178	0.00383069	0.0441916
RHD	21.8635	-1.14366	0.413415	-2.76636	0.0056686	0.0553364
ATP2A3	548.147	-1.14258	0.457536	-2.49725	0.0125162	0.0891835
MMP25	65.9428	-1.14231	0.380711	-3.00047	0.00269561	0.0355779
AMER1	408.259	-1.14154	0.412578	-2.76684	0.00566034	0.055316
PSTPIP1	119.813	-1.1415	0.430562	-2.65117	0.00802123	0.068026
PIK3R5	178.69	-1.14147	0.296497	-3.84986	0.000118184	0.00511501
BIN2	187.674	-1.14043	0.320537	-3.55787	0.000373881	0.0103704
CDA	1102.44	-1.14041	0.510112	-2.23561	0.0253771	0.135226
CAMK4	46.6246	-1.13995	0.372892	-3.05705	0.00223526	0.032124
PCDH19	6.39213	-1.13726	0.571681	-1.98932	0.0466662	0.193782
COBLL1	3778.51	-1.13503	0.32197	-3.52526	0.000423074	0.0113388
CCL3	166.75	-1.13475	0.385405	-2.94431	0.00323677	0.0400054
ARRDC5	6.16344	-1.13468	0.494969	-2.29243	0.0218811	0.123928
GBP5	283.601	-1.1336	0.397773	-2.84987	0.0043737	0.0473713
PLEK	653.945	-1.13263	0.422873	-2.67842	0.00739695	0.0648916
GLIPR1L1	6.58011	-1.13114	0.466205	-2.42627	0.0152549	0.0999902
PITPNM3	25.0001	-1.12854	0.480946	-2.3465	0.0189506	0.113876
NAALADL2	132.24	-1.1279	0.500324	-2.25434	0.0241747	0.13149
ALPK1	440.736	-1.12617	0.337542	-3.33639	0.000848746	0.0175404
KCNAB3	14.1956	-1.12589	0.346748	-3.24701	0.00116626	0.0214325
TNIP3	8.15501	-1.12575	0.560434	-2.00872	0.0445669	0.187912
RAC2	619.235	-1.12419	0.39028	-2.88047	0.0039708	0.0449646
PPM1J	32.6414	-1.12407	0.449747	-2.49935	0.0124423	0.0888738
SLC16A5	81.4116	-1.12356	0.387896	-2.89655	0.00377294	0.0438089
PIM2	953.635	-1.12269	0.365924	-3.06811	0.00215417	0.0314655
FIGF	49.9903	-1.12269	0.474465	-2.36623	0.0179704	0.110366
AR	4923.47	-1.122	0.513113	-2.18666	0.0287671	0.145251
MYCL	1076.07	-1.1211	0.496345	-2.25872	0.023901	0.130599
ANO2	44.9712	-1.11976	0.557846	-2.00729	0.0447185	0.188325
ATF3	1923.23	-1.11976	0.335849	-3.33411	0.000855721	0.0176641
SLC38A2	12864	-1.11747	0.356798	-3.13193	0.00173661	0.0273344
USP50	3.328	-1.11705	0.515902	-2.16524	0.030369	0.149746
GHR	3475.07	-1.11622	0.510706	-2.18565	0.0288415	0.145472
MLC1	15.1644	-1.11617	0.461225	-2.42001	0.01552	0.100654
GCH1	2701.72	-1.11565	0.393719	-2.83362	0.00460247	0.0488382
UGP2	18276.1	-1.11377	0.319956	-3.48099	0.000499557	0.0124408
HIVEP3	212.001	-1.11308	0.349219	-3.18735	0.00143585	0.0243195
IRF8	1007.11	-1.11188	0.395353	-2.81237	0.00491775	0.0508138
IRF9	162	-1.11185	0.374787	-2.96663	0.00301081	0.0382736
OVCH1	2.28845	-1.11119	0.527085	-2.10818	0.0350151	0.163116
ZBTB21	840.608	-1.11079	0.28362	-3.91645	8.98619e-05	0.00426316
AC006128.2	56.4685	-1.11076	0.381146	-2.91426	0.00356534	0.0421111
SLC27A2	9646.3	-1.10965	0.518696	-2.13931	0.0324102	0.156395
CYP2U1	421.602	-1.10822	0.338474	-3.27416	0.00105975	0.0199584
ESR2	13.2494	-1.10688	0.337784	-3.27689	0.00104956	0.0198084
CD80	21.2232	-1.10496	0.499595	-2.21171	0.0269869	0.140038
TBC1D19	154.746	-1.10381	0.388608	-2.84042	0.00450547	0.0482034
FILIP1L	635.768	-1.10344	0.305844	-3.60785	0.000308746	0.00921594
SLC22A3	1496.75	-1.1002	0.456439	-2.41039	0.0159355	0.102381
SLAMF1	68.165	-1.09965	0.434138	-2.53294	0.0113111	0.0841605
RUNDC3B	386.417	-1.09896	0.446327	-2.46223	0.0138076	0.094897
CD1D	304.494	-1.09889	0.486163	-2.26034	0.0238004	0.130409
RCAN1	3689.53	-1.0965	0.382233	-2.86866	0.00412209	0.0459509
JDP2	522.595	-1.09649	0.256268	-4.27867	1.88013e-05	0.00156083
HERC3	583.872	-1.09147	0.281003	-3.88418	0.000102677	0.00465966
RP11-368N21.5	10.608	-1.08835	0.413957	-2.62914	0.00856008	0.0711517
SLC9B2	1189.14	-1.08831	0.329612	-3.3018	0.000960675	0.0189952
PDE7B	157.545	-1.0848	0.365222	-2.97026	0.00297547	0.0379596
C3orf58	1630.17	-1.08462	0.479034	-2.26418	0.023563	0.129449
PATL2	78.3845	-1.08447	0.488337	-2.22074	0.0263686	0.138115
DAAM1	1089.53	-1.0838	0.296363	-3.65701	0.00025517	0.00815583
NAIP	17.5121	-1.08364	0.350708	-3.08988	0.0020024	0.0301373
OAS3	1890.32	-1.08356	0.384351	-2.81919	0.00481457	0.0501565
TET2	348.762	-1.08345	0.215618	-5.02484	5.03854e-07	0.000124809
C5	32924	-1.08233	0.330837	-3.2715	0.0010698	0.0200816
ZC3H13	2597.35	-1.08152	0.369427	-2.92757	0.00341617	0.0411845
TRBV28	117.774	-1.08049	0.54584	-1.9795	0.0477601	0.196404
STX11	130.748	-1.07964	0.461339	-2.34023	0.0192721	0.115325
RCBTB2	308.255	-1.07961	0.286639	-3.76646	0.000165578	0.00625655
ZBTB32	18.8679	-1.07952	0.486148	-2.22057	0.0263804	0.138137
BMP4	314.355	-1.07839	0.500604	-2.15418	0.0312263	0.152623
KLHL6	133.18	-1.07676	0.362345	-2.97164	0.00296217	0.0378756
IZUMO1	10.0422	-1.07662	0.486054	-2.21503	0.0267583	0.13946
CA5A	1121.48	-1.07517	0.509222	-2.11141	0.0347374	0.162379
MAST4	1184.42	-1.07498	0.344663	-3.11893	0.00181507	0.0280762
PTGDR	15.9343	-1.07216	0.465567	-2.30291	0.0212842	0.122138
LILRB1	158.165	-1.07153	0.348859	-3.07151	0.00212978	0.0312888
SLC24A4	15.1187	-1.07149	0.397239	-2.69735	0.00698943	0.062748
RGPD2	23.6812	-1.06932	0.511481	-2.09064	0.03656	0.167492
C9orf72	540.712	-1.06922	0.354451	-3.01654	0.00255673	0.0348776
DHODH	3249.68	-1.06735	0.386111	-2.76437	0.00570329	0.0555837
HDAC9	59.7556	-1.06636	0.297192	-3.58814	0.000333052	0.00962548
PLA2G4B	8.86413	-1.06594	0.442701	-2.40781	0.0160483	0.102939
RUNX3	212.847	-1.0643	0.389436	-2.73293	0.00627732	0.0589056
MEI1	30.6199	-1.06312	0.322522	-3.29628	0.000979757	0.0192233
HABP2	16704.1	-1.06287	0.533362	-1.99277	0.0462868	0.192823
THBD	544.217	-1.06133	0.396676	-2.67557	0.0074603	0.065127
PPAP2B	6673.23	-1.06051	0.391726	-2.70727	0.00678381	0.0618555
MS4A7	832.002	-1.06009	0.24953	-4.24837	2.15334e-05	0.0017145
TMEM26	32.4229	-1.0577	0.300705	-3.51739	0.000435811	0.0115326
OAS1	2597.13	-1.05726	0.405028	-2.61032	0.00904564	0.0733671
CSRNP1	2125.57	-1.05657	0.39714	-2.66044	0.0078038	0.0668817
SLAMF7	173.473	-1.05569	0.432142	-2.44292	0.0145691	0.0979052
SCIMP	113.544	-1.05513	0.309634	-3.40766	0.000655229	0.0148677
PROX2	3.20992	-1.05399	0.523718	-2.01252	0.0441652	0.1867
LEAP2	4750.2	-1.05183	0.381293	-2.75859	0.00580511	0.0562244
EVI2B	255.908	-1.0516	0.346967	-3.03084	0.00243873	0.0338512
MT-ND6	70664.5	-1.05017	0.397114	-2.6445	0.00818122	0.0688589
CEACAM21	41.0447	-1.04977	0.437779	-2.39795	0.0164871	0.104755
ETFDH	3982.98	-1.0491	0.332307	-3.15702	0.00159391	0.0259138
TMEM88	162.205	-1.04339	0.384729	-2.71202	0.0066874	0.0612228
NCKAP1L	575.849	-1.04328	0.328983	-3.17122	0.00151798	0.0250214
ITIH3	100049	-1.04135	0.353167	-2.94859	0.00319225	0.0397027
SMAD1	467.732	-1.04065	0.312513	-3.32993	0.00086868	0.0178079
COMT	6295.32	-1.0403	0.320794	-3.24289	0.00118325	0.0216001
CLEC7A	138.213	-1.03999	0.363685	-2.85959	0.00424189	0.0465073
SLFN12	84.7821	-1.03965	0.464384	-2.23877	0.0251709	0.134596
SASH3	319.169	-1.03799	0.384634	-2.69865	0.00696206	0.062681
RUNX2	42.1848	-1.03723	0.4051	-2.56044	0.010454	0.0804002
C1QTNF4	5.77211	-1.03665	0.500843	-2.06981	0.0384702	0.171826
ANXA3	43.8584	-1.03634	0.449108	-2.30756	0.0210238	0.121385
DUSP2	159.033	-1.03386	0.449663	-2.29919	0.0214942	0.12275
CASS4	99.5019	-1.03306	0.3784	-2.73007	0.00633201	0.0591574
SORL1	5597.93	-1.03211	0.403475	-2.55806	0.0105258	0.0806392
PAQR3	398.017	-1.03184	0.280929	-3.67294	0.000239778	0.00786109
RP1-47M23.3	13.4515	-1.03162	0.49587	-2.08043	0.0374862	0.169816
PPP1R16B	279.128	-1.03056	0.379983	-2.71213	0.00668518	0.0612228
EMR2	74.5269	-1.03018	0.376172	-2.73859	0.00617039	0.058599
SDPR	955.309	-1.02931	0.377006	-2.73023	0.00632898	0.0591574
FLVCR2	878.829	-1.02822	0.370357	-2.7763	0.00549816	0.0544637
TNS3	6701.07	-1.02818	0.296708	-3.46528	0.000529678	0.0128353
CYB5A	26838.8	-1.02767	0.251924	-4.07928	4.51749e-05	0.00274199
SOCS3	2107.75	-1.02641	0.493988	-2.07779	0.0377284	0.170351
HMGCS2	87363.9	-1.02594	0.452011	-2.26972	0.0232247	0.128398
TRAV13-1	3.27624	-1.02579	0.523217	-1.96055	0.049932	0.201936
CCDC158	70.0999	-1.02515	0.444814	-2.30467	0.021185	0.121897
PROX1	8577.37	-1.02465	0.375411	-2.72941	0.00634475	0.0591601
C21orf91	354.163	-1.02419	0.305057	-3.35738	0.000786844	0.0167462
IRS1	11.7606	-1.02416	0.355205	-2.8833	0.00393533	0.0448565
TOB1	9720.38	-1.02217	0.375104	-2.72503	0.00642948	0.0595378
HPS5	1723.08	-1.02185	0.32539	-3.14037	0.00168735	0.0268162
GZMA	186.41	-1.02143	0.443441	-2.30342	0.021255	0.122009
SLA2	74.5431	-1.02091	0.397194	-2.57031	0.0101609	0.0791006
LDLR	5425.83	-1.02045	0.287648	-3.54756	0.000388811	0.010632
SNX20	125.012	-1.01998	0.428975	-2.37772	0.0174201	0.108439
TUBE1	591.486	-1.01974	0.373913	-2.72722	0.00638697	0.0593902
KCNJ8	2484.01	-1.0195	0.428795	-2.3776	0.0174256	0.108439
OMG	7.49443	-1.01856	0.47325	-2.15227	0.0313759	0.153102
HSF5	2.85495	-1.01834	0.508016	-2.00454	0.0450121	0.189248
CDO1	10032.5	-1.01807	0.461761	-2.20474	0.0274721	0.141078
KIAA1551	2208.2	-1.01632	0.401926	-2.52861	0.0114515	0.0847456
SKOR1	10.3217	-1.01578	0.367151	-2.76666	0.00566341	0.055316
KLKB1	5061.48	-1.0142	0.412058	-2.4613	0.0138435	0.0949439
CORIN	17.045	-1.01238	0.505709	-2.00191	0.0452942	0.190031
TNFAIP3	2165.73	-1.01195	0.381493	-2.6526	0.00798755	0.067865
DOCK11	270.226	-1.00915	0.419005	-2.40844	0.0160209	0.102893
B2M	125918	-1.00631	0.312017	-3.22517	0.00125897	0.0225214
ARHGAP9	241.632	-1.00554	0.392611	-2.56117	0.0104319	0.0803339
ACSL1	40755.4	-1.00532	0.508231	-1.97807	0.0479208	0.196578
TTPA	3025.95	-1.00528	0.495869	-2.02731	0.0426309	0.182622
ICK	2101.03	-1.00396	0.411143	-2.44188	0.0146112	0.0979215
FRMD4B	939.54	-1.0033	0.206429	-4.86026	1.17231e-06	0.000224819
DUSP16	4613.48	-1.00326	0.290341	-3.45544	0.000549391	0.0131699
FYN	985.18	-1.00311	0.29106	-3.4464	0.000568118	0.0134919
SH3BP5	241.737	-1.0019	0.411234	-2.43633	0.0148372	0.0984766
CD274	96.5765	-1.00033	0.380071	-2.63195	0.00848964	0.0706876
NETO2	120.729	1.00122	0.423458	2.36438	0.0180601	0.110612
ATP5G1	7376.48	1.00202	0.333353	3.00588	0.00264812	0.0353777
TYSND1	1281.55	1.0028	0.31599	3.17353	0.00150596	0.0248692
SPC24	439.748	1.00329	0.42616	2.35425	0.0185601	0.112248
RNF24	353.89	1.00474	0.331463	3.03123	0.00243558	0.0338512
CARD14	30.6289	1.00506	0.475732	2.11267	0.0346291	0.162076
TCOF1	2062.32	1.00525	0.239498	4.19732	2.70094e-05	0.00198112
TMEM98	2057.43	1.00629	0.483546	2.08106	0.0374283	0.169597
SCAMP3	6063.26	1.00634	0.275035	3.65895	0.000253247	0.00810891
GSTO2	467.49	1.01072	0.496966	2.03378	0.0419738	0.180822
OSBP2	223.167	1.0108	0.457084	2.21142	0.0270071	0.140095
CLN3	1016.28	1.01118	0.332146	3.04439	0.00233152	0.0328787
MTMR7	135.072	1.01119	0.512546	1.97287	0.0485103	0.1983
PAK1	1529.51	1.01126	0.300325	3.36721	0.000759322	0.016238
TTK	218.426	1.014	0.451474	2.24598	0.0247056	0.133266
SCNM1	1238.6	1.01427	0.263289	3.85232	0.000117002	0.00508959
HOXB5	35.0421	1.01429	0.429875	2.35951	0.0182993	0.111389
DTYMK	1412.24	1.0143	0.36157	2.80525	0.00502772	0.0514749
ZNRD1	793.833	1.01452	0.331772	3.05789	0.00222899	0.0320596
PLXNA3	526.455	1.01466	0.452103	2.24431	0.0248124	0.133614
CHAC1	317.39	1.01652	0.478958	2.12235	0.033808	0.160065
HUS1B	5.37594	1.01681	0.447228	2.27358	0.0229913	0.127673
KIAA1614	95.1732	1.019	0.46698	2.18211	0.0291018	0.146247
SEMA6C	814.54	1.01917	0.347583	2.93218	0.00336596	0.0407549
MYO10	688.606	1.02011	0.513248	1.98756	0.0468603	0.194407
RPP21	357.866	1.02487	0.285172	3.59385	0.000325825	0.00947599
JMJD6	1377.36	1.02835	0.233951	4.39559	1.10474e-05	0.00103756
FAM83D	638.714	1.02884	0.371747	2.76758	0.00564734	0.0552498
SNRPD2	5857	1.0289	0.324958	3.16624	0.00154422	0.0253276
MTL5	114.869	1.02974	0.471887	2.18218	0.0290959	0.146247
SLC25A12	260.257	1.03015	0.392328	2.62573	0.00864624	0.0715465
SERPINH1	3836.46	1.03152	0.299647	3.44247	0.000576436	0.0136344
TMEM81	171.019	1.03193	0.271387	3.80242	0.000143289	0.00574284
ECE2	988.499	1.03266	0.2968	3.47931	0.000502706	0.0124871
TRIM59	95.1171	1.03383	0.377933	2.73548	0.00622898	0.0589017
VPS72	2137.74	1.03403	0.241738	4.27747	1.89032e-05	0.00156083
CHML	729.261	1.03418	0.444042	2.32902	0.0198579	0.117429
MFSD10	948.179	1.03636	0.274805	3.77126	0.000162425	0.00618986
C22orf15	11.6658	1.03644	0.497608	2.08285	0.0372647	0.169108
PBK	302.099	1.03728	0.460439	2.25281	0.0242713	0.131711
PTPLA	20.5017	1.03864	0.520155	1.99679	0.0458482	0.191483
TRIP6	3844.77	1.0412	0.343668	3.02967	0.00244824	0.033942
PLOD2	4100.24	1.04203	0.339659	3.06787	0.00215592	0.0314655
TBKBP1	330.097	1.04303	0.311792	3.34528	0.000822006	0.0171572
WDR62	373.916	1.04388	0.3984	2.62017	0.00878856	0.0720993
PCBP4	1151.64	1.04485	0.296623	3.52248	0.000427536	0.0114148
EXO1	234.985	1.04498	0.455449	2.29439	0.0217679	0.123562
HGH1	2598.07	1.04521	0.389687	2.68218	0.00731431	0.0644944
OXLD1	1143.06	1.04616	0.303869	3.44278	0.000575768	0.0136344
CDK18	1519.58	1.04762	0.510478	2.05223	0.0401473	0.176067
PRR11	301.375	1.04801	0.411601	2.54618	0.0108908	0.0824086
PLEKHH2	51.743	1.04812	0.4971	2.10847	0.0349903	0.163108
HSPE1	9405.68	1.04838	0.273511	3.83306	0.000126561	0.00532362
ZNF577	196.006	1.04847	0.466346	2.24827	0.0245589	0.13277
MSTO1	718.838	1.04848	0.261095	4.01571	5.92676e-05	0.0033136
GINS2	439.527	1.05131	0.351954	2.98707	0.0028167	0.0366471
CKLF	361.17	1.05167	0.372277	2.82496	0.00472862	0.0496051
CRABP2	26.0712	1.05181	0.49602	2.12049	0.0339648	0.160385
HSPA1B	2847.07	1.05189	0.378603	2.77834	0.0054637	0.0543053
TES	850.589	1.05191	0.380072	2.76765	0.00564624	0.0552498
PFDN6	2819.38	1.05294	0.264379	3.98271	6.81351e-05	0.00358463
CCDC34	801.169	1.05389	0.426216	2.47267	0.0134109	0.0932127
GGCT	1309.37	1.05551	0.193671	5.45	5.03697e-08	2.42796e-05
ZNF813	170.729	1.05563	0.533614	1.97826	0.0478992	0.196578
HSP90AB1	57023.5	1.05655	0.219706	4.80892	1.51751e-06	0.000267967
PCDHGA10	83.8602	1.05709	0.475253	2.22427	0.0261303	0.137352
KCNMB4	80.4153	1.05762	0.488417	2.1654	0.0303574	0.149746
HOXB6	46.0165	1.05871	0.503342	2.10336	0.035434	0.164489
BYSL	1098.05	1.06229	0.253777	4.1859	2.84035e-05	0.00202631
C1orf210	342.727	1.06257	0.538147	1.9745	0.0483252	0.197679
CASKIN1	5.56057	1.06265	0.473184	2.24575	0.0247202	0.133278
TACC3	1206.09	1.06271	0.30386	3.49736	0.000469891	0.0120848
PPP1R35	850.915	1.06369	0.31479	3.37905	0.000727367	0.0158435
APOA1BP	7905.37	1.06425	0.291752	3.64781	0.000264485	0.00837848
ENO1	53167.1	1.06462	0.334359	3.18407	0.00145221	0.0244572
ZNF773	123.607	1.06486	0.439641	2.42212	0.0154304	0.100411
ZNF675	166.697	1.06643	0.412567	2.58486	0.00974194	0.0767201
GTSE1	213.264	1.06722	0.418689	2.54896	0.0108043	0.0820678
NEU1	6784.99	1.0677	0.259422	4.1157	3.86007e-05	0.00249188
SUPT3H	248.94	1.06875	0.315415	3.38839	0.000703048	0.0155373
PDLIM7	879.813	1.07027	0.317234	3.37375	0.000741529	0.016044
FAM71E1	117.245	1.07056	0.402346	2.66079	0.00779578	0.066845
LZTS2	1419.63	1.07077	0.283479	3.77725	0.000158569	0.00609671
RDM1	52.3269	1.07213	0.533115	2.01106	0.0443188	0.187216
LRFN4	100.092	1.07232	0.517126	2.07362	0.0381143	0.171111
S100A10	7534.58	1.07273	0.470565	2.27966	0.0226281	0.126353
NFKBIE	1153.48	1.07288	0.362696	2.95807	0.00309572	0.0389092
GRAMD1A	2419.49	1.07352	0.367494	2.92119	0.00348697	0.0415988
TMEM184A	1338.46	1.07381	0.352124	3.04951	0.00229216	0.0325483
TSACC	86.8076	1.0742	0.383567	2.80056	0.00510144	0.0518997
NARF	2699.76	1.07561	0.29747	3.61586	0.000299349	0.00906954
TRPC1	61.0428	1.07733	0.454646	2.36959	0.0178078	0.109745
FAM78B	167.729	1.07802	0.450947	2.39058	0.0168219	0.106126
STC2	436.864	1.08054	0.385531	2.80274	0.005067	0.0517582
CCDC183	59.5821	1.08091	0.377138	2.8661	0.00415567	0.0461497
TRIM15	729.518	1.08132	0.408832	2.64491	0.00817128	0.0688077
RPL8	72037	1.08249	0.434709	2.49014	0.0127692	0.0904918
FAM188B	76.8804	1.08583	0.38125	2.84808	0.00439846	0.0475721
SNRPA1	1309.09	1.08593	0.300551	3.61314	0.000302506	0.00910267
SPATA45	5.5095	1.08679	0.450583	2.41197	0.0158665	0.102253
COMTD1	911.689	1.08752	0.48952	2.2216	0.0263106	0.137874
GRIK1	9.32504	1.08822	0.503707	2.16043	0.0307392	0.15107
ZNF320	397.005	1.08918	0.529214	2.0581	0.0395803	0.174538
WBP5	975.378	1.0906	0.466257	2.33904	0.0193333	0.115411
ZNF285	59.2836	1.09164	0.512126	2.13159	0.0330405	0.158026
CFAP45	17.0735	1.09227	0.520674	2.0978	0.0359232	0.165682
ARHGEF16	870.12	1.09291	0.480858	2.27283	0.0230364	0.127862
CYP2W1	9.9925	1.09485	0.531501	2.05992	0.0394059	0.174091
TROAP	388.652	1.09613	0.484204	2.26377	0.0235881	0.129484
PCDHB10	24.1661	1.09657	0.50692	2.16319	0.0305263	0.150438
EFNA3	192.764	1.09704	0.519619	2.11124	0.0347519	0.162379
ITM2C	2412.11	1.09822	0.445601	2.46458	0.0137173	0.0945314
TALDO1	14496	1.09855	0.356832	3.07862	0.00207961	0.0309082
IGSF3	691.708	1.10032	0.540397	2.03613	0.0417375	0.180283
CDC25A	177.139	1.10233	0.389333	2.83133	0.00463545	0.0490061
TMEM125	16.7559	1.10299	0.501364	2.19998	0.0278081	0.142036
PCDHGB6	38.5423	1.10304	0.419435	2.62981	0.00854321	0.0711004
GAS2L3	247.554	1.10393	0.322647	3.42148	0.000622815	0.0142592
ZNF525	145.312	1.10439	0.467914	2.36024	0.0182631	0.111389
RECQL4	973.604	1.10705	0.447395	2.47445	0.0133443	0.0930031
LSM2	1554.94	1.10719	0.291517	3.79804	0.000145847	0.00581918
HJURP	337.952	1.11318	0.440415	2.52757	0.0114855	0.0849038
CCDC167	1648.41	1.11338	0.328407	3.39026	0.000698267	0.0155032
NOX4	68.8384	1.11359	0.393829	2.8276	0.00468982	0.0493178
SH3D21	89.6488	1.11379	0.378922	2.93936	0.00328886	0.0402388
S100A11	2231.19	1.11618	0.457991	2.43712	0.0148047	0.098413
BAG2	1026.66	1.11638	0.336446	3.31817	0.000906104	0.0182603
LGALS1	5305.13	1.11717	0.418587	2.66892	0.00760964	0.0658825
RP11-158L12.4	19.6652	1.11725	0.473381	2.36014	0.018268	0.111389
CCR10	18.3637	1.11761	0.448224	2.49341	0.0126523	0.0898609
GPC2	11.8495	1.11812	0.512224	2.18288	0.0290447	0.146207
EIF3B	10240.7	1.11874	0.227209	4.92385	8.48568e-07	0.00017805
SNRPC	4959.17	1.11908	0.284035	3.93994	8.15016e-05	0.00399336
PSMG3	1340.06	1.11911	0.300045	3.7298	0.000191628	0.00687663
HDAC11	1135.53	1.11985	0.271395	4.12626	3.68712e-05	0.00240879
SRPX2	165.127	1.12112	0.4695	2.38791	0.0169443	0.10671
PCDHB7	33.2722	1.12127	0.505457	2.21833	0.0265327	0.138742
NUDT14	1009.45	1.12259	0.427969	2.62307	0.00871411	0.0717533
BEX4	361.858	1.12262	0.495259	2.26674	0.0234059	0.129025
IL22RA1	1021.17	1.12555	0.529189	2.12694	0.033425	0.159012
DEPDC1B	202.566	1.12603	0.47216	2.38484	0.0170866	0.107303
PGP	1259.48	1.1277	0.32475	3.47252	0.000515603	0.0126838
ZNF486	44.6576	1.12871	0.464132	2.43188	0.0150209	0.0991478
ZNF300	126.636	1.12939	0.554959	2.03508	0.041843	0.18052
C16orf59	296.72	1.12992	0.488634	2.31241	0.0207553	0.120655
TNFRSF21	1245.03	1.13032	0.342528	3.29993	0.000967095	0.0190798
TNN	59.2435	1.13279	0.548162	2.06652	0.0387793	0.172444
FGFR3	2452.32	1.13396	0.432935	2.61924	0.00881267	0.0721644
HRC	106.163	1.13433	0.441882	2.56704	0.0102572	0.0796763
TMEM171	170.34	1.1349	0.574735	1.97465	0.0483084	0.197655
CDCA3	323.451	1.13563	0.370316	3.06665	0.00216474	0.0314912
GALK1	7252.69	1.13567	0.372241	3.05089	0.00228162	0.0325022
ATP5EP2	27.8597	1.13606	0.423033	2.68551	0.00724199	0.0640997
AIM1L	134.973	1.13716	0.500797	2.2707	0.0231649	0.128266
SLC6A9	174.146	1.13774	0.497028	2.28909	0.0220743	0.124547
QPCT	84.4239	1.14508	0.412058	2.77894	0.00545364	0.0542777
RASSF7	3360.01	1.14669	0.399394	2.87108	0.00409075	0.0457707
SLC52A3	79.5164	1.14747	0.489	2.34657	0.0189472	0.113876
HPDL	15.6261	1.14896	0.547741	2.09764	0.0359373	0.165704
C11orf70	3.91329	1.14931	0.567336	2.0258	0.0427852	0.182903
CDC25C	214.695	1.15025	0.479338	2.39967	0.0164097	0.104375
PYCRL	1825.45	1.15122	0.318628	3.61304	0.000302622	0.00910267
SECTM1	1033.81	1.15219	0.427243	2.6968	0.00700101	0.062748
TRAIP	172.858	1.1522	0.337691	3.41201	0.000644864	0.0147262
SQSTM1	51820.3	1.15249	0.460062	2.50507	0.0122426	0.0882527
SAMD13	17.5247	1.1531	0.545466	2.11397	0.0345179	0.161751
SQLE	5025.64	1.15581	0.455616	2.5368	0.011187	0.0834476
CLEC5A	10.784	1.15604	0.572226	2.02025	0.0433579	0.184468
MOGAT3	1289.68	1.15678	0.545927	2.11893	0.0340966	0.160706
ZHX1-C8orf76	55.2307	1.15824	0.397971	2.91036	0.00361017	0.0424999
GNAT1	39.3386	1.15972	0.504775	2.29749	0.0215907	0.122908
C6orf1	965.06	1.15976	0.265701	4.36489	1.27184e-05	0.00115144
EVA1B	320.695	1.16153	0.397679	2.92077	0.0034917	0.0415995
ZBTB12	155.664	1.16341	0.396736	2.93246	0.00336292	0.0407457
ZNF66	12.3472	1.16504	0.519729	2.24163	0.0249854	0.134252
FAM195B	4253.96	1.16542	0.3217	3.6227	0.000291541	0.0089612
C11orf49	428.113	1.1656	0.336261	3.46635	0.000527572	0.0128307
KIAA0101	450.684	1.16672	0.364678	3.19931	0.00137759	0.0238305
DUSP23	5993.15	1.16685	0.380138	3.06954	0.0021439	0.0314444
RAB6B	186.965	1.16699	0.380536	3.06668	0.00216447	0.0314912
RNFT2	93.6393	1.16701	0.510145	2.2876	0.0221607	0.124867
FLVCR1	807.975	1.16776	0.348009	3.35555	0.000792082	0.0167777
NCAPG	488.493	1.16808	0.45651	2.55871	0.0105061	0.0805942
RP11-803D5.1	3.07106	1.16825	0.562617	2.07646	0.0378513	0.170597
MND1	157.939	1.16882	0.423859	2.75756	0.00582346	0.0563468
C1QTNF2	23.8767	1.16903	0.551706	2.11894	0.0340955	0.160706
CDH6	223.197	1.16966	0.40843	2.86379	0.0041861	0.0461999
ZSCAN18	734.423	1.1709	0.480144	2.43864	0.0147427	0.098257
ABCC4	894.131	1.17249	0.546272	2.14635	0.0318451	0.154807
NAALADL1	129.304	1.17468	0.410934	2.85855	0.0042558	0.0465657
SYNE4	689.973	1.17923	0.459631	2.56561	0.0102995	0.0798341
ADM2	657.642	1.17933	0.51572	2.28676	0.0222097	0.125018
PDLIM3	625.346	1.18049	0.440394	2.68053	0.00735065	0.0646125
ZNF257	33.5328	1.18107	0.576597	2.04834	0.0405263	0.17698
DTNBP1	578.358	1.18226	0.335377	3.52518	0.0004232	0.0113388
NDUFA4L2	1181.89	1.183	0.419504	2.81999	0.00480248	0.0500598
NGFRAP1	3522.18	1.1853	0.548247	2.16198	0.0306195	0.150621
KCTD17	428.034	1.18594	0.44299	2.67714	0.00742541	0.0650184
ZNF208	10.9649	1.18697	0.557617	2.12865	0.0332831	0.158845
PLEKHB1	45.6774	1.18739	0.504582	2.35322	0.0186117	0.112484
SKA1	241.254	1.18747	0.482457	2.4613	0.0138436	0.0949439
PLD5	4.87231	1.1883	0.542125	2.19192	0.028385	0.143942
PCDHB2	31.5874	1.18883	0.554124	2.14542	0.0319192	0.155032
MAPK12	581.427	1.1896	0.538273	2.21003	0.0271028	0.14015
IGF1R	234.478	1.19035	0.469262	2.53665	0.0111919	0.0834476
ZNF665	34.0435	1.19041	0.530714	2.24303	0.024895	0.133897
RTKN2	58.8124	1.19085	0.583249	2.04175	0.0411767	0.178857
MDS2	4.40915	1.1947	0.544694	2.19334	0.0282832	0.14359
C11orf84	397.442	1.19523	0.284939	4.19468	2.73257e-05	0.00198112
TEKT5	27.9253	1.19613	0.499234	2.39593	0.0165783	0.10511
ADCY5	257.513	1.19667	0.54627	2.19063	0.0284788	0.144255
EIF4EBP1	2014.03	1.19865	0.344879	3.47556	0.00050979	0.012593
TFAP2E	16.5421	1.19911	0.468477	2.55959	0.0104795	0.0805265
RRP12	1705.4	1.20088	0.264585	4.53872	5.65959e-06	0.000659731
COLEC12	125.076	1.20252	0.544782	2.20734	0.0272903	0.140625
SPC25	161.085	1.20305	0.449358	2.67726	0.00742274	0.0650184
MARCH3	114.746	1.20308	0.451405	2.6652	0.00769418	0.0663246
FOXL1	27.2689	1.20774	0.562055	2.1488	0.0316503	0.154104
EME1	129.175	1.20906	0.432375	2.79633	0.00516862	0.0523466
ZSCAN16	188.579	1.20981	0.306244	3.95047	7.79967e-05	0.00388463
DNAJA4	195.679	1.21118	0.443071	2.7336	0.00626464	0.0589056
ZNF14	80.1041	1.21323	0.480859	2.52304	0.0116344	0.0854258
PCDHGA4	40.5608	1.21374	0.550602	2.20438	0.0274975	0.141128
TREM2	257.869	1.21628	0.586152	2.07502	0.0379848	0.170892
PCSK5	462.851	1.2163	0.450024	2.70274	0.00687697	0.0624319
DBNDD1	1729.83	1.2173	0.511694	2.37896	0.0173615	0.108198
ARID3A	470.636	1.22168	0.457975	2.66756	0.00764034	0.0660521
PGF	363.848	1.22256	0.437892	2.79194	0.00523938	0.0528531
SYN3	20.6294	1.22348	0.429253	2.85026	0.0043684	0.0473619
KIF2C	480.182	1.22435	0.46188	2.65079	0.00803041	0.0680715
S100A16	8461.33	1.22519	0.399771	3.06474	0.00217857	0.0315837
B3GALNT1	170.52	1.22616	0.409598	2.99356	0.0027574	0.0361871
NFKBIL1	1642.99	1.22733	0.324879	3.77781	0.000158215	0.00609671
NUF2	312.771	1.22758	0.441623	2.7797	0.00544087	0.0542521
TMEM51	289.756	1.23102	0.473955	2.59734	0.00939489	0.075273
ASNS	287.592	1.23132	0.536644	2.29449	0.0217625	0.123562
RP11-826F13.1	6.70266	1.23626	0.451113	2.74047	0.00613516	0.0583888
RP11-635L1.2	7.19911	1.23709	0.563723	2.19451	0.0281989	0.143203
KISS1	87.7	1.23774	0.484329	2.55557	0.0106013	0.0809394
CDCA2	124.725	1.23817	0.490649	2.52355	0.0116178	0.0853995
HOXA9	4.69139	1.24053	0.617575	2.00871	0.0445679	0.187912
UBE2T	500.445	1.24066	0.402113	3.08536	0.00203307	0.0304449
SDK1	110.683	1.24188	0.611113	2.03215	0.0421381	0.18118
CENPA	133.912	1.24275	0.468979	2.64992	0.00805119	0.0681566
EPS8L1	43.5732	1.24385	0.504977	2.46318	0.0137711	0.0947196
MGP	1999.68	1.24649	0.587734	2.12084	0.033935	0.160359
MUC20	268.812	1.24865	0.488199	2.55767	0.0105376	0.0806601
ANXA2	19313.9	1.24939	0.340955	3.66439	0.000247932	0.0079817
MUC1	81.066	1.25484	0.633325	1.98135	0.0475525	0.195926
PPFIA2	9.90335	1.25564	0.593273	2.11646	0.0343058	0.161118
CA8	22.4482	1.25639	0.635192	1.97796	0.0479329	0.196578
BCAS4	204.83	1.25643	0.411912	3.05024	0.00228658	0.0325468
AURKB	362.298	1.25646	0.441593	2.8453	0.004437	0.0478151
SLC52A2	1554.58	1.25755	0.388848	3.23403	0.00122055	0.0220871
WFDC3	12.5233	1.26033	0.601209	2.09632	0.0360538	0.16594
FADS1	6533.93	1.26192	0.635913	1.98442	0.0472092	0.195309
PERM1	28.0736	1.263	0.567214	2.22667	0.0259697	0.136911
HSPA1A	6869.54	1.26608	0.321098	3.94295	8.04846e-05	0.00395439
SLC35E4	83.8064	1.26835	0.306965	4.1319	3.59773e-05	0.00239288
FAM72D	16.8552	1.27092	0.547618	2.32082	0.0202968	0.119145
CDK1	648.832	1.27133	0.383926	3.31139	0.000928338	0.0185281
C10orf35	202.709	1.27186	0.594782	2.13836	0.0324878	0.156558
ZNF682	112.633	1.27274	0.446291	2.85181	0.00434708	0.0472457
TFCP2L1	32.6872	1.27375	0.576305	2.2102	0.0270916	0.140148
UBE2S	770.05	1.27462	0.337429	3.77744	0.000158448	0.00609671
CCL28	279.753	1.27474	0.50628	2.51786	0.011807	0.086126
SRRM3	31.6734	1.27641	0.532451	2.39724	0.016519	0.104846
RTN4RL2	1676.56	1.27868	0.491182	2.60327	0.00923387	0.0745287
HES6	429.207	1.28116	0.413197	3.1006	0.00193129	0.0293698
SLC26A6	1253.22	1.28254	0.24822	5.16695	2.37951e-07	7.44535e-05
CCNB2	488.079	1.28268	0.420249	3.0522	0.00227169	0.0324385
PPP1R9A	159.598	1.28735	0.583898	2.20476	0.0274711	0.141078
CCT3	21528.4	1.29027	0.282721	4.56375	5.02477e-06	0.000601455
PLK1	539.664	1.29209	0.459057	2.81466	0.00488291	0.0506907
TLDC2	134.031	1.29302	0.492429	2.62581	0.0086443	0.0715465
EXOSC4	2201.4	1.29343	0.440642	2.93533	0.00333195	0.0405357
EMID1	675.888	1.29438	0.61856	2.09257	0.0363876	0.166855
CENPO	354.8	1.2967	0.361808	3.58395	0.000338433	0.00968199
NEIL3	123.167	1.29777	0.563808	2.3018	0.0213463	0.122334
KIFC1	785.557	1.29837	0.440618	2.9467	0.00321189	0.0398083
ZNF681	68.4589	1.2994	0.53654	2.42181	0.0154432	0.100411
CDKN3	420.901	1.30039	0.431017	3.01702	0.00255272	0.0348604
SLC6A8	765.871	1.30174	0.615729	2.11414	0.0345033	0.161751
IFI27L2	510.821	1.30279	0.550638	2.36596	0.0179834	0.110396
HENMT1	118.748	1.30531	0.554278	2.35497	0.0185242	0.112183
ALDOA	21303.6	1.30542	0.29146	4.47891	7.50245e-06	0.000796466
DTNA	1049.9	1.30672	0.541414	2.41352	0.0157991	0.101982
PDGFRL	104.135	1.30701	0.50292	2.59884	0.00935384	0.0751467
ZP3	113.984	1.30756	0.494623	2.64354	0.00820439	0.0688914
SNRPE	3170.54	1.30786	0.324188	4.03425	5.47764e-05	0.00311127
NCK2	881.804	1.31482	0.432049	3.04321	0.00234067	0.0329515
RP11-485M7.2	3.60381	1.31485	0.465437	2.82499	0.00472822	0.0496051
TRIP13	263.988	1.31533	0.451692	2.912	0.00359127	0.0423334
NEK2	427.066	1.31544	0.481175	2.7338	0.00626074	0.0589056
KCNJ11	191.802	1.3188	0.577652	2.28304	0.0224278	0.125707
AFP	822.255	1.32007	0.629652	2.09651	0.036037	0.16594
CLIC1	8687.62	1.32164	0.31344	4.21656	2.48061e-05	0.00189067
FBLN1	1551.87	1.32666	0.521276	2.54502	0.010927	0.0825078
CIB2	142.629	1.33055	0.614295	2.16598	0.0303124	0.149633
KRT17	43.5316	1.33144	0.559123	2.3813	0.0172518	0.107809
CAGE1	2.45081	1.33512	0.636321	2.09819	0.0358887	0.165651
HOMER3	553.772	1.33652	0.462426	2.89024	0.00384951	0.0442821
TPM2	1853.71	1.33888	0.44666	2.99755	0.00272163	0.0358231
COLEC11	2200.21	1.33909	0.585393	2.28751	0.0221659	0.124867
PDZD3	4.18547	1.33964	0.605506	2.21243	0.0269373	0.139821
ADPRHL1	369.277	1.34227	0.58094	2.31051	0.0208601	0.120949
SNRPN	1985.67	1.34424	0.427882	3.14161	0.00168024	0.0267562
COL9A2	130.041	1.34868	0.569345	2.36883	0.0178444	0.109856
FBLIM1	1048.79	1.35165	0.387976	3.48384	0.000494271	0.0123811
ZNF812	11.3367	1.35185	0.56499	2.3927	0.0167249	0.105626
NELFE	3820.71	1.35307	0.306551	4.41386	1.01545e-05	0.000989648
LRP4	98.5984	1.35351	0.497083	2.72291	0.00647092	0.0598283
MFSD4	99.9713	1.35406	0.557525	2.4287	0.0151532	0.099726
UCK2	1787.62	1.3542	0.2718	4.98233	6.28219e-07	0.000141826
HILPDA	250.588	1.35558	0.316352	4.28502	1.82721e-05	0.00153718
SMOX	495.78	1.35589	0.460811	2.94241	0.0032567	0.040087
PLCH1	35.1814	1.35951	0.624724	2.17618	0.0295418	0.147292
PLAC8L1	13.5253	1.36074	0.446433	3.04802	0.00230351	0.0326575
ZNF90	20.0574	1.36425	0.413327	3.30065	0.00096462	0.019052
TMEM132A	378.965	1.3669	0.460473	2.96848	0.0029928	0.0381261
MCF2L2	25.0402	1.36831	0.597571	2.28978	0.0220342	0.124445
CCL20	1415.33	1.36962	0.658832	2.07887	0.0376296	0.170163
CBX2	286.001	1.37046	0.469593	2.91841	0.00351825	0.0417739
C15orf27	76.6412	1.37075	0.577696	2.37279	0.0176543	0.109138
LHX9	38.8465	1.37108	0.670293	2.0455	0.0408061	0.17781
TMSB10	18119.2	1.37531	0.433342	3.17372	0.00150499	0.0248692
ZNF667	76.8319	1.37596	0.606108	2.27016	0.0231977	0.128329
SHC3	42.9951	1.37705	0.565305	2.43595	0.0148529	0.0984766
RIBC2	57.8126	1.37726	0.602446	2.28612	0.0222473	0.125108
BEST1	91.6958	1.37924	0.368834	3.73947	0.000184408	0.00672204
DDIT3	1572.7	1.38007	0.311333	4.43279	9.30235e-06	0.00093733
ANKRD13B	107.264	1.38168	0.383499	3.60284	0.000314761	0.00933185
ZNF701	109.553	1.38321	0.385582	3.58734	0.000334072	0.00962548
BIRC5	1364.55	1.3879	0.50368	2.75552	0.00585993	0.0565846
CDCP1	89.706	1.39042	0.514581	2.70205	0.00689138	0.0624531
NUDT17	91.6875	1.39087	0.342344	4.06278	4.84911e-05	0.00285425
KIAA1377	32.494	1.39342	0.563298	2.47368	0.0133729	0.093057
CACYBP	3162.22	1.39461	0.26299	5.30289	1.13982e-07	4.1487e-05
SPOCD1	34.7378	1.39647	0.683364	2.04353	0.0410001	0.17835
ZNF781	57.8184	1.39783	0.563885	2.47893	0.0131779	0.0922036
CDT1	586.588	1.40102	0.421828	3.32132	0.000895943	0.0181223
NME1	3608.33	1.40567	0.35491	3.96064	7.47497e-05	0.00380903
NYNRIN	729.779	1.40688	0.584978	2.40501	0.0161719	0.103489
GLI1	36.589	1.41276	0.441063	3.20308	0.00135964	0.0236117
NXPH3	33.9862	1.42748	0.464525	3.073	0.00211921	0.0311975
ZFP82	100.261	1.42905	0.494452	2.89016	0.0038504	0.0442821
NREP	1361.5	1.42961	0.373192	3.83078	0.000127738	0.00536047
CCNB1	1131.43	1.43024	0.419855	3.40651	0.000657984	0.0148923
SCIN	36.1992	1.4303	0.71172	2.00963	0.04447	0.187588
PTTG1	866.664	1.4304	0.498724	2.86813	0.00412912	0.045998
HSPA6	163.788	1.43046	0.389853	3.66923	0.000243279	0.00790326
KPNA7	80.5914	1.43138	0.551745	2.59428	0.00947898	0.0757427
TM4SF1	6444.46	1.43223	0.456089	3.14024	0.00168808	0.0268162
TFAP2A	48.1214	1.43293	0.682331	2.10004	0.0357249	0.165254
PSRC1	248.273	1.43452	0.360713	3.9769	6.98204e-05	0.00362107
HSF2BP	20.4866	1.43876	0.404799	3.55427	0.000379027	0.0104968
CHST10	152.044	1.43892	0.552422	2.60474	0.00919429	0.0743337
KLHL30	17.4198	1.44034	0.561454	2.56537	0.0103064	0.0798341
CENPW	254.786	1.44634	0.389438	3.71391	0.000204082	0.00715089
SLC16A14	292.091	1.44653	0.547938	2.63995	0.00829171	0.0694611
ZNF610	57.9237	1.44721	0.700031	2.06735	0.0387009	0.172297
PSORS1C1	34.8603	1.45268	0.580025	2.50452	0.0122619	0.0882527
UGT1A8	7.3517	1.45404	0.660358	2.20189	0.0276729	0.141741
S100A6	2497.93	1.45444	0.559793	2.59817	0.00937224	0.0751824
ALPK2	448.588	1.45501	0.662655	2.19573	0.0281113	0.143063
P2RY6	179.202	1.45596	0.586618	2.48195	0.0130664	0.0917476
TUB	121.692	1.45737	0.729082	1.9989	0.0456188	0.190809
CSNK2B-LY6G5B-562	3.53691	1.4594	0.47337	3.083	0.00204923	0.0306098
CTD-2256P15.3	2.29728	1.45983	0.579676	2.51836	0.0117904	0.0861107
UBE2C	524.041	1.46002	0.473703	3.08214	0.00205521	0.0306473
CCNJL	35.95	1.46127	0.510176	2.86424	0.00418008	0.0461789
PRSS35	22.1205	1.4638	0.460731	3.17711	0.0014875	0.0247017
SRSF12	48.4198	1.46784	0.596669	2.46005	0.0138918	0.0951458
METTL24	21.0802	1.47178	0.727227	2.02383	0.0429881	0.183375
HSD17B14	2369.34	1.47497	0.598102	2.46608	0.0136602	0.0943521
ZNF239	60.2209	1.47644	0.666963	2.21368	0.026851	0.139739
DRD4	30.0268	1.47721	0.409902	3.60381	0.000313581	0.00933018
RGS2	1063.85	1.47724	0.586264	2.51976	0.0117435	0.0858991
BOLA2B	24.428	1.48242	0.470059	3.15369	0.00161222	0.0260926
CENPM	378.426	1.48243	0.51001	2.90666	0.00365309	0.042892
HN1	2749.32	1.48404	0.34892	4.25322	2.10714e-05	0.00169283
MST1R	58.1639	1.48694	0.590889	2.51645	0.0118545	0.0863588
LRRC69	32.1447	1.48768	0.535868	2.7762	0.00549981	0.0544637
MFI2	383.759	1.48775	0.610193	2.43817	0.014762	0.0983119
ZNF607	147.201	1.48877	0.401255	3.7103	0.000207017	0.00717755
EPHX4	10.8182	1.48918	0.52148	2.85569	0.00429438	0.0468442
DGKG	136.63	1.48937	0.557481	2.67161	0.00754883	0.0654716
ZNF835	33.1376	1.49158	0.586831	2.54176	0.0110297	0.0828514
SKA3	220.182	1.49212	0.461955	3.23002	0.00123784	0.0222101
PGD	8821.24	1.49449	0.373903	3.99702	6.41456e-05	0.0034563
IL1RL2	147.068	1.49452	0.603731	2.47548	0.0133057	0.0928794
ARTN	23.0194	1.49853	0.537303	2.78899	0.00528733	0.0531864
RCOR2	32.1041	1.50215	0.736235	2.04031	0.0413193	0.179095
GPR156	4.03074	1.50285	0.723821	2.07627	0.037869	0.170597
NUDT1	516.537	1.50463	0.334574	4.49717	6.88653e-06	0.00074891
GOLGA7B	111.235	1.50488	0.767177	1.96158	0.049811	0.20163
CKM	2.06543	1.50826	0.628494	2.3998	0.0164042	0.104375
ALOX15	15.2917	1.5124	0.635281	2.38068	0.0172809	0.107845
EGFL6	9.47458	1.51502	0.628169	2.41181	0.0158735	0.102253
C19orf45	10.4187	1.51544	0.590293	2.56727	0.0102503	0.0796763
SEMA3C	49.4191	1.51872	0.574586	2.64315	0.00821389	0.0689387
BOP1	4728.61	1.51924	0.441638	3.44001	0.000581692	0.0136686
UAP1L1	472.241	1.52105	0.610037	2.49337	0.0126535	0.0898609
DNAH10	29.9767	1.52123	0.624838	2.4346	0.0149082	0.0986965
SGSM1	56.9441	1.52328	0.541371	2.81374	0.00489687	0.0507528
MCHR1	216.892	1.52634	0.626002	2.43823	0.0147593	0.0983119
TRIB3	4084.35	1.52965	0.423845	3.60897	0.00030741	0.0091991
ZNF391	45.5184	1.52989	0.626459	2.44212	0.0146012	0.0979215
SLC15A1	1199.76	1.53163	0.639761	2.39407	0.0166625	0.105456
COLCA2	87.8194	1.53509	0.533732	2.87614	0.00402574	0.0452991
ZIK1	71.7804	1.53753	0.523167	2.93889	0.00329392	0.0402388
IMPDH1	720.83	1.53974	0.456634	3.37194	0.000746409	0.0160946
TMEM72	10.7918	1.54265	0.701253	2.19985	0.0278178	0.142036
ZFP92	47.9807	1.54555	0.594885	2.59806	0.00937514	0.0751824
GSDMC	29.2594	1.55677	0.729767	2.13324	0.0329047	0.157799
PCYT1B	5.18436	1.56214	0.755578	2.06748	0.0386893	0.172297
SGCE	696.781	1.56979	0.548966	2.85953	0.00424264	0.0465073
NT5DC2	1040.88	1.56998	0.473248	3.31746	0.000908402	0.0182859
LARP6	201.464	1.57313	0.660243	2.38265	0.0171885	0.107526
RP11-185E8.2	15.7951	1.57822	0.65442	2.41163	0.0158812	0.102253
COL4A6	8.96458	1.57902	0.642198	2.45878	0.0139411	0.095337
PYY	10.6057	1.57963	0.74389	2.12348	0.0337137	0.159789
SELM	2032.56	1.58164	0.617124	2.56292	0.0103797	0.0801737
GAREML	129.509	1.58267	0.574096	2.75681	0.0058369	0.0564234
QSOX1	2763.61	1.58753	0.598386	2.65301	0.00797767	0.0678501
SLC1A7	212.088	1.58895	0.75804	2.09613	0.0360702	0.165964
ZNF738	56.2821	1.58988	0.402148	3.95348	7.70214e-05	0.00388463
ASB12	2.57946	1.59159	0.787054	2.02221	0.0431549	0.183823
KCNJ15	66.9123	1.59763	0.510463	3.12976	0.0017495	0.0274186
HSPB7	40.9029	1.59831	0.610552	2.61782	0.00884941	0.0723024
HRCT1	538.891	1.60098	0.665867	2.40435	0.0162013	0.103529
ZNF880	96.2814	1.601	0.487259	3.28573	0.0010172	0.0195186
TEX29	11.3296	1.60359	0.532294	3.01261	0.00259015	0.0351563
FAM64A	77.0279	1.60672	0.656039	2.44913	0.0143203	0.0969615
PAFAH1B3	853.048	1.60728	0.491707	3.26877	0.00108017	0.0202361
FOXS1	101.892	1.60762	0.529427	3.03653	0.00239316	0.0335024
BAMBI	1898.06	1.60912	0.565508	2.84544	0.00443504	0.0478151
ARL9	3.42205	1.61131	0.605099	2.66288	0.00774748	0.066621
CLDN11	102.567	1.61462	0.564586	2.85983	0.00423866	0.0465073
NMB	202.931	1.61933	0.403857	4.00966	6.0807e-05	0.0033472
PKM	7067.93	1.62112	0.438513	3.69686	0.000218282	0.00746602
CDC20	884.905	1.62343	0.510727	3.17867	0.00147953	0.0246612
ADRA2A	138.402	1.62591	0.767026	2.11975	0.0340267	0.160539
MARCKSL1	3427.79	1.62708	0.394176	4.1278	3.66248e-05	0.00240148
ZNF93	57.2999	1.62784	0.374299	4.34903	1.36741e-05	0.00121333
PTP4A3	1157.67	1.63347	0.523497	3.1203	0.00180668	0.0280681
RP13-415G19.2	3.30672	1.63372	0.692386	2.35955	0.018297	0.111389
RP11-424M24.3	1.74035	1.63454	0.714362	2.28811	0.0221308	0.124748
C3orf80	30.1081	1.63709	0.722597	2.26557	0.0234778	0.129244
HMGA1	4263.16	1.63757	0.374338	4.37458	1.21667e-05	0.00111278
TMED3	1485.34	1.63765	0.583118	2.80844	0.00497818	0.0511762
C3orf52	19.1838	1.64207	0.714406	2.29851	0.0215329	0.122872
DNAH3	10.0318	1.64993	0.726595	2.27077	0.0231607	0.128266
NDRG1	11379.9	1.65121	0.497063	3.32193	0.000893966	0.0181223
PMEPA1	640.144	1.65219	0.565275	2.92281	0.00346888	0.0414384
ASRGL1	585.259	1.6546	0.547354	3.02291	0.00250353	0.0344686
SCD5	121.297	1.65607	0.538839	3.0734	0.00211632	0.0311975
IGF2BP2	548.837	1.65931	0.673458	2.46387	0.0137447	0.0946461
EPB41L1	1478.55	1.66071	0.531423	3.12502	0.00177796	0.0277913
GDF15	8157.59	1.66168	0.612523	2.71284	0.00667086	0.0611381
SCTR	82.8084	1.66269	0.703149	2.36463	0.0180482	0.110577
ART3	3.39613	1.66548	0.719432	2.31499	0.0206136	0.120027
PFN2	1024.06	1.666	0.610065	2.73086	0.00631688	0.0591023
PI3	31.1174	1.6663	0.738679	2.25578	0.0240845	0.131119
CAPN8	35.9149	1.66709	0.555347	3.00189	0.00268307	0.0355779
COL24A1	33.5243	1.66796	0.739003	2.25704	0.0240055	0.130942
PDE9A	408.613	1.66945	0.623806	2.67623	0.00744557	0.065094
DNAI1	9.34076	1.67332	0.84005	1.99193	0.0463793	0.192994
RSPH1	47.379	1.67778	0.639078	2.62531	0.00865697	0.0715465
SLC7A10	12.6516	1.68011	0.797554	2.10657	0.0351546	0.163575
SSTR2	162.042	1.68516	0.525024	3.20968	0.00132881	0.0233262
SLC5A2	29.3048	1.68596	0.520545	3.23884	0.00120018	0.0217838
S100A14	1273.68	1.69796	0.667817	2.54256	0.0110044	0.0827653
LEFTY1	43.2274	1.69886	0.669322	2.53818	0.011143	0.0833269
CATSPERB	20.1716	1.70156	0.660411	2.57652	0.00998013	0.078034
MNS1	317.883	1.70227	0.614727	2.76914	0.00562038	0.055198
SAPCD2	138.424	1.70369	0.557965	3.0534	0.00226266	0.0323354
DNAJB13	5.41646	1.7047	0.613743	2.77755	0.00547707	0.0543593
CCL26	10.856	1.70523	0.854182	1.99633	0.0458979	0.191483
TM4SF19	8.68757	1.70916	0.771922	2.21417	0.0268174	0.139646
ZNF556	5.51542	1.70957	0.716571	2.38577	0.0170436	0.107108
CRYAB	312.042	1.70985	0.437232	3.91062	9.20601e-05	0.00430943
TYRO3	352.879	1.7108	0.585372	2.92259	0.00347132	0.0414397
ZNF502	82.3822	1.71216	0.478557	3.57777	0.00034654	0.00982598
OSR2	82.4239	1.71275	0.786597	2.17742	0.0294493	0.14713
RNF183	7.27718	1.71327	0.853201	2.00805	0.0446376	0.188117
ACHE	561.999	1.71742	0.804304	2.13529	0.0327371	0.157292
FOXO6	29.0889	1.7201	0.756077	2.27503	0.0229041	0.127376
REEP2	39.2618	1.72049	0.558258	3.08189	0.0020569	0.0306473
RP11-407P15.2	12.6	1.72062	0.600978	2.86304	0.004196	0.0462806
BSPRY	153.542	1.7217	0.657829	2.61724	0.0088644	0.0723885
NKAIN4	0.962015	1.72193	0.8702	1.97878	0.0478408	0.196517
LRRC1	494.215	1.72433	0.557585	3.0925	0.00198479	0.0299228
HTRA3	267.565	1.72762	0.607239	2.84503	0.00444067	0.0478257
RIMS2	6.01307	1.72967	0.713755	2.42333	0.0153789	0.100355
TUSC5	1.04628	1.73397	0.830093	2.08889	0.0367177	0.167827
SLC1A5	1240.17	1.73626	0.45345	3.829	0.000128665	0.00538673
MSMB	8.41562	1.73694	0.70923	2.44905	0.0143232	0.0969615
SNURF	2.76096	1.7415	0.652313	2.66973	0.00759112	0.065754
C5orf30	195.034	1.74358	0.59166	2.94694	0.00320939	0.0398083
DNM1	310.606	1.74615	0.561493	3.10984	0.00187191	0.0287716
TKT	18883.6	1.74955	0.459148	3.81042	0.00013873	0.00564897
ELOVL7	242.643	1.75624	0.736651	2.38409	0.0171214	0.107383
MPZ	1231.33	1.75663	0.742325	2.36638	0.0179628	0.11036
CLCNKA	30.6254	1.7582	0.63513	2.76826	0.00563571	0.0552498
DUSP26	13.2755	1.75854	0.700827	2.50923	0.0120995	0.0876142
C1orf186	150.062	1.77143	0.786127	2.25336	0.0242365	0.131699
GPC3	24136.8	1.77369	0.79418	2.23336	0.0255253	0.135812
DCDC2	971.683	1.77526	0.802145	2.21315	0.0268875	0.139821
GSTT2B	192.269	1.77664	0.74366	2.38905	0.0168918	0.106417
AC003973.3	49.9977	1.7772	0.798867	2.22465	0.0261047	0.137298
PHEX	23.2904	1.77728	0.685488	2.59272	0.00952211	0.0759852
IL17D	125.312	1.77751	0.688059	2.58337	0.00978407	0.0769735
TNNC1	43.6095	1.78057	0.491216	3.62482	0.000289163	0.00892252
LYG2	4.69333	1.78127	0.71137	2.504	0.0122797	0.0883101
CDKL2	1.85712	1.78579	0.898676	1.98713	0.0469079	0.194488
GNAZ	496.414	1.78743	0.569772	3.13709	0.00170631	0.0270028
PDE6A	5.88952	1.79316	0.625895	2.86495	0.00417079	0.0461738
SEPT5	343.788	1.79322	0.515923	3.47575	0.000509425	0.012593
PACSIN1	143.733	1.79542	0.773646	2.32073	0.0203017	0.119145
PCDHGA3	24.2546	1.79762	0.672817	2.67177	0.00754513	0.0654716
RP5-864K19.6	2.38593	1.79793	0.533855	3.36782	0.00075764	0.0162215
HSPB1	24518.7	1.80562	0.37444	4.82218	1.41998e-06	0.000255811
GPR1	3.91159	1.81141	0.659109	2.74828	0.00599094	0.0574999
HAVCR1	18.2491	1.8171	0.878826	2.06764	0.0386736	0.172297
MMP11	742.918	1.82484	0.639468	2.85369	0.00432148	0.0470823
C17orf78	1.65982	1.82518	0.795699	2.2938	0.0218017	0.123714
MYT1	17.5021	1.82576	0.778261	2.34595	0.0189785	0.113967
CDKN1C	269.285	1.8291	0.553799	3.30283	0.00095715	0.0189844
GJA3	2.64557	1.82964	0.837006	2.18593	0.0288209	0.145413
STRIP2	198.263	1.83054	0.61753	2.96429	0.00303385	0.0384489
CLDN4	1525.82	1.8306	0.753599	2.42914	0.0151348	0.0996783
IQCD	96.0823	1.83113	0.580938	3.15202	0.00162146	0.0261378
HECW1	47.526	1.84166	0.847498	2.17306	0.029776	0.147844
RAB3C	79.774	1.85169	0.761469	2.43174	0.0150267	0.0991494
PFKFB4	278.938	1.85248	0.448598	4.12947	3.63594e-05	0.00239288
ASPHD1	232.609	1.85536	0.816739	2.27167	0.0231064	0.128062
MSI1	244.056	1.85625	0.895209	2.07354	0.038122	0.171111
TTYH1	32.2939	1.85659	0.665483	2.78983	0.00527354	0.0531376
TRIM16	995.341	1.8567	0.627379	2.95945	0.00308185	0.0387737
TUBB8	1.9002	1.86385	0.940327	1.98213	0.0474642	0.195773
ILDR1	51.9837	1.86712	0.789019	2.36637	0.0179633	0.11036
EIF5A2	311.464	1.86784	0.600857	3.10862	0.00187962	0.0288245
DDN	3.9168	1.88494	0.572039	3.29512	0.000983786	0.0192461
LRRC36	9.75669	1.88843	0.885838	2.1318	0.0330234	0.157986
ZNF454	9.77232	1.89946	0.560858	3.3867	0.000707376	0.0155946
CYP19A1	8.26923	1.90072	0.829807	2.29056	0.0219888	0.12434
SPINT2	1329.84	1.90128	0.71603	2.65531	0.00792366	0.0675519
CCDC36	9.22951	1.903	0.562339	3.38407	0.000714186	0.0156866
PRR7	148.112	1.9045	0.47401	4.01785	5.87306e-05	0.00330301
C12orf42	6.30261	1.90514	0.738484	2.5798	0.00988588	0.077501
DYDC1	2.10558	1.90937	0.929048	2.05519	0.0398604	0.175329
GYLTL1B	397.105	1.91272	0.667759	2.86439	0.00417808	0.0461789
CPEB1	5.70986	1.91319	0.806463	2.37232	0.0176766	0.109203
TESC	1225.53	1.91466	0.766595	2.49762	0.0125029	0.0891247
CTHRC1	273.568	1.92158	0.600548	3.19971	0.00137566	0.0238202
PYCR1	1175.42	1.92352	0.825448	2.33028	0.0197914	0.117152
PTPRZ1	11.0179	1.92657	0.669634	2.87705	0.0040141	0.0452252
B3GNT3	543.633	1.92856	0.802957	2.40183	0.0163135	0.103985
MYL3	27.8528	1.92954	0.645835	2.98767	0.00281115	0.0366413
MAPK13	603.798	1.93075	0.53326	3.62065	0.000293862	0.00900521
FAM24B	26.0094	1.93599	0.481454	4.02114	5.79173e-05	0.00327922
PPIAL4B	1.23994	1.93895	0.889826	2.17902	0.0293301	0.146774
SMC1B	59.9606	1.94076	0.774227	2.50671	0.0121861	0.0880983
ENTPD3	11.0981	1.94202	0.856802	2.26659	0.0234152	0.129025
MMP17	56.7116	1.94219	0.685421	2.83357	0.00460319	0.0488382
MYO18B	86.4084	1.94635	0.893921	2.17732	0.0294565	0.14713
SLC4A3	53.2533	1.94706	0.734208	2.65191	0.00800367	0.0679093
S100A9	867.405	1.94747	0.588688	3.30816	0.000939116	0.0186724
DBN1	1174.53	1.94874	0.421931	4.61862	3.86297e-06	0.000519475
MMP1	60.4198	1.95379	0.735609	2.65601	0.00790711	0.0674753
LYPD6	18.3492	1.95433	0.852656	2.29205	0.0219025	0.123941
TMEM54	688.664	1.96271	0.526992	3.72437	0.000195807	0.00698444
ME1	1556.71	1.9674	0.573047	3.43324	0.00059642	0.0138866
ZSCAN1	3.80404	1.96919	0.892211	2.20709	0.0273076	0.140638
BEGAIN	42.7255	1.97107	0.814436	2.42017	0.0155132	0.100647
CDS1	78.8822	1.97191	0.525589	3.75181	0.000175564	0.00649623
GALNT5	8.22166	1.97665	0.778423	2.53929	0.0111076	0.0832023
WFDC2	63.047	1.97859	0.862874	2.29302	0.0218468	0.123891
PPP1R1B	9.69574	1.98037	0.78648	2.51802	0.0118018	0.0861232
LAD1	2546.85	1.98054	0.751622	2.63502	0.00841312	0.0701814
OCA2	35.5607	1.98153	0.911103	2.17487	0.0296399	0.147455
TMEM130	27.0198	1.98198	0.845532	2.34406	0.019075	0.114477
IGDCC4	20.9	1.98295	0.63384	3.12847	0.00175721	0.0275129
PCDHB9	24.6083	1.98457	0.558791	3.55155	0.000382976	0.010557
TRAV30	7.97858	1.98499	0.973377	2.03928	0.0414217	0.17931
STOX1	79.4582	1.98984	0.605459	3.2865	0.00101442	0.0195186
GRIK4	16.7489	1.99704	0.778439	2.56545	0.0103043	0.0798341
RP11-254F19.4	3.12309	1.99864	0.817374	2.4452	0.0144772	0.0974713
AKR1B10	42682.2	1.99892	0.95637	2.09011	0.0366082	0.16759
TMEM61	17.6782	2.00036	0.90627	2.20724	0.0272971	0.140625
SH2D5	8.04124	2.00227	0.71133	2.81483	0.00488026	0.0506907
DCDC1	109.394	2.006	0.896548	2.23747	0.0252554	0.134669
DNER	3.58507	2.01307	0.838625	2.40044	0.0163755	0.104306
SOX4	1342	2.02174	0.563576	3.58734	0.000334066	0.00962548
SLC45A4	372.65	2.02539	0.508038	3.9867	6.69993e-05	0.00354579
EPO	119.436	2.02593	0.967393	2.09422	0.0362405	0.166456
LYPD8	44.7183	2.02865	0.840774	2.41283	0.015829	0.102064
UNC13C	1.78152	2.03308	0.996235	2.04076	0.0412744	0.17908
ZNF711	50.7351	2.03741	0.597751	3.40845	0.000653321	0.0148433
PLEKHG4B	12.1824	2.04362	0.709274	2.88129	0.00396052	0.0449646
FBXW10	74.1527	2.0442	0.818207	2.49839	0.0124759	0.0890402
TRPC3	9.01005	2.04453	0.717173	2.85082	0.0043607	0.0473072
KCNK9	42.0064	2.04746	0.996628	2.05438	0.0399387	0.175494
PCDHA5	2.24392	2.04817	0.962332	2.12834	0.0333091	0.158884
INHA	12.8887	2.04919	0.760698	2.69383	0.00706366	0.0631797
RP11-2K6.1	2.12492	2.05029	0.877781	2.33576	0.0195036	0.115988
EQTN	1.34153	2.05691	0.916568	2.24414	0.0248235	0.133633
RGS9BP	4.74577	2.0586	0.686633	2.9981	0.00271666	0.0358105
TYRP1	2.70027	2.0591	0.949567	2.16846	0.0301236	0.149043
HR	35.1488	2.05963	0.583227	3.53144	0.000413301	0.0111685
CALY	12.4648	2.06	0.704533	2.92392	0.0034565	0.0413736
ZBTB9	1.56314	2.06315	0.769596	2.68082	0.00734411	0.0646111
OBSCN	244.467	2.06315	0.514368	4.01104	6.04515e-05	0.00333793
GLRB	228.221	2.06471	0.947145	2.17993	0.0292625	0.146724
CHRND	5.23044	2.06621	0.871481	2.37091	0.0177442	0.109429
RASGEF1C	5.63196	2.07409	0.784487	2.64387	0.0081963	0.0688914
SERPINA12	38.1175	2.08937	0.577376	3.61873	0.000296052	0.00902579
GUCY2D	31.9561	2.09326	0.717335	2.9181	0.00352168	0.0417739
LRRC74A	2.1395	2.09472	1.04728	2.00016	0.0454826	0.190459
ZIC4	113.507	2.09911	1.016	2.06605	0.0388241	0.172516
GPR133	629.405	2.09972	0.652628	3.21733	0.00129392	0.023008
FLNC	1873.04	2.10218	0.966796	2.17437	0.0296771	0.147558
P2RX6	34.598	2.11501	0.644587	3.28118	0.00103374	0.0196763
EPHB3	85.323	2.11659	0.665461	3.18063	0.00146954	0.024578
PKIB	450.806	2.12503	0.683852	3.10744	0.00188717	0.0289156
SEMA6A	849.037	2.12697	0.533283	3.98844	6.65078e-05	0.00354579
BARX1	7.95384	2.13072	0.851378	2.50267	0.0123261	0.0885133
CTNND2	43.6671	2.13107	1.00837	2.11337	0.0345687	0.161905
TRIM16L	1516.53	2.13856	0.622311	3.43648	0.000589328	0.0137662
PCDH9	119.68	2.13929	0.751819	2.84548	0.0044344	0.0478151
LINGO1	410.489	2.14523	0.661252	3.24419	0.00117784	0.0215234
ZNF135	87.2431	2.15338	0.557099	3.86534	0.000110935	0.00489446
CTC-260E6.4	22.2078	2.1622	0.568969	3.8002	0.000144577	0.00578145
PQLC2L	1.53534	2.16304	0.909818	2.37744	0.0174331	0.108442
MEX3A	297.217	2.1704	0.47421	4.57688	4.7197e-06	0.000580522
SLC16A3	1111.84	2.17214	0.505792	4.29453	1.75067e-05	0.00149328
ADAMTS16	37.2709	2.17451	0.807535	2.69278	0.0070859	0.0632452
MYO7B	349.028	2.18041	0.662593	3.29073	0.00099929	0.0193984
MYBL2	927.065	2.18103	0.498193	4.37789	1.19835e-05	0.00110168
SPP1	45274.1	2.18719	0.948739	2.30536	0.0211464	0.121857
TEX19	9.55494	2.19279	0.703002	3.11918	0.00181357	0.0280762
LY6H	35.4854	2.2064	0.749921	2.94218	0.00325911	0.040087
CDRT1	29.6279	2.2098	0.8872	2.49075	0.0127472	0.0903964
SSUH2	235.283	2.21107	0.736793	3.00094	0.00269151	0.0355779
COL28A1	21.787	2.21634	0.884707	2.50517	0.0122392	0.0882527
PEG10	1273.24	2.21644	0.86933	2.5496	0.0107847	0.0819883
OTX1	86.3276	2.21861	0.693913	3.19725	0.00138745	0.0239103
AKR1B15	441.286	2.21882	0.956396	2.31998	0.0203417	0.119322
SFN	2649.16	2.22053	0.790672	2.8084	0.0049788	0.0511762
MUC13	9371.36	2.22451	0.867155	2.56529	0.0103088	0.0798341
CDCA7	161.839	2.23088	0.738024	3.02277	0.0025047	0.0344686
GFY	1.78319	2.23983	0.913609	2.45162	0.0142213	0.096587
C6orf141	57.9186	2.24392	0.811997	2.76346	0.00571929	0.0556787
TPRXL	11.0486	2.24985	0.851073	2.64354	0.00820439	0.0688914
MMEL1	17.4138	2.25301	0.608869	3.70032	0.000215324	0.00738519
HHIPL2	61.9224	2.25307	0.846204	2.66257	0.00775471	0.066621
PRH2	11.8151	2.2532	0.786047	2.86649	0.00415045	0.0461204
SLC22A8	4.77212	2.25528	0.973809	2.31593	0.020562	0.119962
C12orf75	696.248	2.25922	0.611245	3.6961	0.000218936	0.00746602
GRIK2	8.05314	2.26141	0.799697	2.82783	0.00468646	0.0493115
KRT20	7.58165	2.26522	0.984154	2.30169	0.0213527	0.122334
EGLN3	447.735	2.26633	0.615185	3.68398	0.000229617	0.00768334
TRPM5	2.5932	2.27108	0.879869	2.58115	0.00984704	0.0772984
KAAG1	23.6555	2.27135	0.838383	2.7092	0.00674451	0.0616443
S100A2	35.0343	2.27809	0.701542	3.24726	0.00116522	0.0214325
KIAA1549L	22.4981	2.28298	0.696296	3.27875	0.00104267	0.0197563
HOXD1	7.99928	2.28332	0.862787	2.64644	0.0081343	0.0685935
USP44	24.4174	2.28447	0.718233	3.18069	0.00146926	0.024578
DPCR1	1.0371	2.28742	0.950317	2.40701	0.0160839	0.103075
KIF5A	6.46724	2.29608	1.04823	2.19044	0.0284924	0.144282
ZNF99	31.7778	2.30148	0.940342	2.44749	0.0143856	0.097111
TTC39A	764.512	2.30684	0.624445	3.69423	0.000220553	0.00746654
FABP6	4.40076	2.31435	1.10841	2.088	0.036798	0.167913
ZNF233	37.9399	2.31741	0.413396	5.60578	2.07319e-08	1.15819e-05
RENBP	1239.9	2.31894	0.645248	3.59388	0.000325796	0.00947599
FSIP1	18.5579	2.31949	0.623454	3.72039	0.000198917	0.00703689
FAHD2B	172.844	2.32347	0.641351	3.62278	0.000291454	0.0089612
ANKRD45	24.4683	2.33085	0.599632	3.88714	0.000101433	0.00465053
PRTN3	7.72008	2.33373	1.11663	2.08999	0.0366189	0.16759
CSAG1	85.4363	2.35292	1.17838	1.99674	0.0458535	0.191483
MYO1A	158.111	2.35399	0.616487	3.81839	0.000134327	0.00552011
SPINT1	875.703	2.35762	0.783815	3.00788	0.0026308	0.0352664
TAC3	23.1197	2.36013	1.05642	2.23409	0.0254773	0.135616
SLC39A4	1044.71	2.36042	0.738733	3.19523	0.00139721	0.0239839
MFSD2B	29.6342	2.36819	0.467871	5.06163	4.15678e-07	0.000110651
COL4A5	269.685	2.36822	0.775995	3.05185	0.00227436	0.0324506
RP11-243M5.2	1.45655	2.38419	0.937409	2.54339	0.0109784	0.0826492
PAK3	58.5078	2.38568	0.931812	2.56026	0.0104595	0.0804075
OVOL2	16.3043	2.38634	0.827051	2.88536	0.00390968	0.0446695
OVOL1	17.5037	2.38763	0.976151	2.44596	0.0144467	0.0973758
PPFIA4	43.2814	2.38792	0.843954	2.82945	0.00466283	0.0492304
PCDHB16	133.657	2.3902	0.576939	4.14291	3.42931e-05	0.00232554
RFPL2	8.68882	2.39696	0.912123	2.62789	0.00859165	0.0713371
GAL3ST1	737.48	2.40379	0.762657	3.15186	0.00162235	0.0261378
KRT7	1808.87	2.40429	0.850504	2.82691	0.00470001	0.0493958
CPA6	7.04207	2.40734	0.782549	3.07628	0.00209599	0.0310999
KRTCAP3	217.504	2.40909	0.659845	3.651	0.00026122	0.0082898
MYH13	4.1248	2.41562	1.09174	2.21263	0.0269229	0.139821
TUSC3	587.044	2.4175	0.569893	4.24201	2.21522e-05	0.00174046
SIRT2	579.595	2.4259	0.517695	4.68596	2.78646e-06	0.000407349
CD24	5655.31	2.42764	0.657113	3.69441	0.000220402	0.00746654
IGSF11	1.64704	2.42874	0.78976	3.0753	0.00210294	0.0311512
PTCHD1	3.72385	2.43011	0.875467	2.77578	0.00550687	0.0544824
CA7	1.53439	2.43824	0.919237	2.65246	0.00799083	0.067865
DDX4	1.72244	2.4404	1.0719	2.27671	0.0228036	0.126936
PHLDA2	337.704	2.44073	0.554372	4.40269	1.06917e-05	0.00102519
SPHK1	797.646	2.44197	0.664587	3.67442	0.000238387	0.00785885
EPS8L3	729.109	2.44692	0.860555	2.84342	0.00446323	0.0479817
SYT13	95.1698	2.45299	1.06995	2.29262	0.0218698	0.123904
CABYR	617.182	2.45311	0.821823	2.98497	0.00283608	0.0368133
LHFPL4	10.1392	2.45541	0.955523	2.5697	0.0101786	0.0792036
ZNF728	3.25572	2.45563	1.11059	2.2111	0.0270286	0.140095
ACPT	9.17339	2.45648	0.693538	3.54195	0.000397178	0.0107983
PNMA3	120.133	2.47321	0.654507	3.77874	0.000157623	0.00609671
KLC3	23.9753	2.47531	0.768014	3.22301	0.00126853	0.0226695
GGT6	20.6973	2.48826	0.900391	2.76353	0.00571796	0.0556787
PCDHA1	18.7085	2.50821	0.856962	2.92686	0.00342403	0.0412061
PPM1E	209.903	2.51966	0.804774	3.13089	0.00174275	0.0273369
CERS1	31.4887	2.52109	0.942353	2.67531	0.00746599	0.0651448
RETNLB	1.18468	2.52456	1.25233	2.01588	0.0438121	0.185924
GLB1L3	21.4852	2.53635	1.06914	2.37232	0.0176769	0.109203
GPR35	293.062	2.54597	0.754622	3.37383	0.000741304	0.016044
HOXA11	2.67363	2.5512	1.06749	2.3899	0.016853	0.106285
TNNI2	79.4382	2.5522	0.629888	4.05183	5.08176e-05	0.00295222
RPL39L	527.434	2.55866	0.704328	3.63277	0.000280393	0.00872743
ITIH5	606.714	2.57253	0.738815	3.48198	0.000497728	0.0124327
FXYD3	87.3097	2.57477	0.660598	3.89763	9.71379e-05	0.00448822
DQX1	39.5967	2.58236	1.0583	2.4401	0.014683	0.0980426
CHST8	7.36765	2.5838	0.858652	3.00914	0.0026199	0.0352652
FRAS1	178.239	2.58747	0.695326	3.72122	0.000198259	0.00702972
PRR19	78.6321	2.59749	0.569043	4.56466	5.00305e-06	0.000601455
STEAP1B	13.5259	2.60556	0.693739	3.75583	0.000172771	0.00641951
HOXA6	2.25828	2.60998	1.25733	2.07582	0.0379109	0.170688
PTPRN	4.19206	2.62557	0.740663	3.54489	0.000392781	0.010695
SLC5A11	169.871	2.6293	0.779479	3.37315	0.000743142	0.0160459
TMC4	372.797	2.63328	0.620746	4.24212	2.2142e-05	0.00174046
LYPD1	387.791	2.63542	0.785177	3.35647	0.000789456	0.0167618
CAMKV	2.26075	2.6371	1.29527	2.03594	0.0417562	0.18032
RPL10L	1.54524	2.64437	1.21501	2.17643	0.0295235	0.147292
KRTAP1-1	1.48464	2.65143	1.23773	2.14218	0.0321788	0.155615
ADAM23	273.325	2.66505	0.842398	3.16364	0.00155807	0.0255125
C12orf56	26.1537	2.6689	0.8716	3.06207	0.00219815	0.0317956
KIRREL3	9.91431	2.67025	0.590783	4.51985	6.18826e-06	0.000707485
C10orf90	9.63587	2.67092	1.00208	2.66539	0.00769002	0.0663208
ZIC5	107.43	2.68008	0.952949	2.81241	0.00491724	0.0508138
GGT2	2.49086	2.68912	0.895221	3.00387	0.00266573	0.0354801
SLC6A11	306.759	2.69357	1.29237	2.08421	0.0371412	0.168768
FSTL5	83.3377	2.69637	1.30826	2.06104	0.0392992	0.173748
ZNF492	9.00068	2.70341	0.915331	2.95347	0.00314219	0.0392444
DGKK	1.44932	2.709	1.22397	2.21329	0.0268779	0.139821
C1orf116	138.032	2.71315	0.695787	3.8994	9.64294e-05	0.00446706
AFF2	5.23097	2.71371	1.18556	2.28897	0.0220813	0.124548
PCDHA2	2.1443	2.72123	1.15346	2.35918	0.0183154	0.11141
BCAS1	172.134	2.72475	0.868704	3.13657	0.00170937	0.0270271
DHDH	48.6294	2.72525	0.715535	3.80869	0.000139703	0.00565695
TMPRSS7	2.16422	2.72901	1.18587	2.30128	0.021376	0.122428
NXPH4	96.5815	2.73563	0.626143	4.36902	1.24808e-05	0.00113569
NKAIN2	43.4502	2.73635	0.973268	2.81151	0.00493101	0.0508645
EFNA5	38.1507	2.74224	0.652074	4.2054	2.60617e-05	0.00194482
CHST5	1.61898	2.74544	1.30193	2.10875	0.0349663	0.163039
KRT80	139.185	2.74777	0.724063	3.79493	0.000147682	0.00585314
COL22A1	46.5138	2.76014	0.773882	3.56662	0.00036162	0.0100931
CPA2	8.44776	2.76744	1.37646	2.01055	0.0443726	0.187354
G6PD	3285.85	2.77769	0.555905	4.9967	5.83185e-07	0.000135079
TMEM179	8.94066	2.8071	0.973354	2.88394	0.00392733	0.0448182
CREG2	14.4517	2.80867	0.634727	4.42501	9.64367e-06	0.000955527
MALRD1	6.34	2.82143	0.833638	3.38448	0.000713145	0.015683
VIL1	2141.74	2.82465	0.628548	4.49392	6.99228e-06	0.000755802
FAM131C	20.8357	2.82798	0.833787	3.39174	0.000694511	0.0155001
SYT8	26.7139	2.83031	0.786307	3.5995	0.000318832	0.00938344
ETV4	1304.75	2.83736	0.801324	3.54083	0.000398864	0.0108276
CAMK2A	19.6345	2.85102	0.722724	3.94482	7.9859e-05	0.00393449
ZNF560	1.50881	2.86654	1.20497	2.37894	0.0173626	0.108198
ERVMER34-1	18.1502	2.8673	0.904816	3.16894	0.00152997	0.0251726
CDC26	2.32416	2.90411	1.36564	2.12655	0.0334572	0.159092
GCNT3	571.294	2.92523	0.788405	3.71031	0.000207002	0.00717755
BRDT	1.77639	2.92938	1.23926	2.36382	0.0180875	0.11067
MRAP2	188.835	2.94042	0.851734	3.45228	0.00055588	0.0132365
UPK3A	108.287	2.97366	1.01719	2.92339	0.00346239	0.0413972
ENPP5	108.41	2.98001	0.899297	3.31371	0.00092067	0.0184319
ADORA1	108.211	2.98505	0.725219	4.11607	3.85395e-05	0.00249188
B3GALT5	14.3725	2.99232	0.953006	3.13987	0.0016902	0.0268192
BSND	2.56212	2.99661	0.983864	3.04576	0.00232093	0.0328262
SLC6A19	12.0474	3.01156	1.18939	2.53201	0.011341	0.0843131
WNT7B	16.4013	3.01362	0.908658	3.31657	0.000911313	0.0183036
SPOCK3	6.00118	3.01458	1.18141	2.55167	0.0107207	0.0816414
PAK7	1.0132	3.01491	1.52239	1.98038	0.047661	0.196177
NKAIN1	3.80532	3.02197	1.03147	2.92979	0.00339195	0.040986
RXFP4	0.852375	3.02639	1.19854	2.52507	0.0115676	0.0851887
CLPSL2	1.7125	3.02933	1.23772	2.4475	0.0143849	0.097111
SGPP2	77.3939	3.04474	0.670243	4.54275	5.55259e-06	0.000651516
TMEM132D	15.028	3.04949	0.752471	4.05263	5.06446e-05	0.00295178
ZPLD1	20.1063	3.06331	0.925839	3.30868	0.000937363	0.0186583
KISS1R	7.98726	3.07701	1.23679	2.4879	0.0128501	0.0908369
PODXL2	382.322	3.08162	0.753918	4.08748	4.36093e-05	0.00267276
RASAL1	81.4796	3.08433	0.803692	3.8377	0.000124194	0.0052498
STRA8	5.47744	3.08599	0.816862	3.77785	0.000158186	0.00609671
PPP1R14D	46.8408	3.09127	0.859103	3.59825	0.000320361	0.0094129
PAGE1	40.5688	3.09837	1.47668	2.0982	0.0358877	0.165651
UGT2B28	9.708	3.10212	0.849201	3.65299	0.000259209	0.00825786
SORCS1	8.84994	3.11346	1.49357	2.08458	0.0371073	0.168762
GLRA3	2.76795	3.11421	1.26391	2.46394	0.0137418	0.0946461
RNF103-CHMP3	5.7702	3.11836	0.808634	3.85634	0.000115099	0.00501907
DMBX1	5.94683	3.12054	1.07406	2.90538	0.00366804	0.042957
ADAMTS20	1.73487	3.13133	1.16967	2.67711	0.00742599	0.0650184
ISX	167.66	3.1517	1.33222	2.36574	0.0179939	0.110396
PRKG2	2.80999	3.15392	1.03235	3.05508	0.00224998	0.0322575
RLN3	2.35235	3.15454	1.3055	2.41635	0.0156771	0.10141
ABCB5	16.301	3.1639	1.0315	3.06729	0.00216006	0.0314912
KCNG1	16.1604	3.16837	0.801802	3.95157	7.76408e-05	0.00388463
SMIM22	25.7438	3.17152	0.741696	4.27603	1.90253e-05	0.00156367
AGR3	1.55616	3.18039	1.47244	2.15995	0.0307766	0.151171
MYH4	810.184	3.18141	1.48449	2.14311	0.0321045	0.15546
CA12	1319.87	3.18622	0.767448	4.15171	3.29997e-05	0.00229008
KCNC2	81.2929	3.19416	1.51681	2.10584	0.0352184	0.163769
EPCAM	1461.29	3.19473	1.02294	3.1231	0.00178956	0.0279105
FER1L5	16.3253	3.19764	0.630596	5.07082	3.961e-07	0.000110382
PDIA2	83.7393	3.2031	0.931954	3.43697	0.00058826	0.0137662
GLDN	130.235	3.21655	0.707602	4.54571	5.47494e-06	0.00064666
CALN1	1.56176	3.22916	1.06057	3.04474	0.00232881	0.0328787
CRISP3	20.9558	3.24164	1.21201	2.67459	0.00748209	0.0651591
PCDHA3	7.89244	3.25032	0.904135	3.59495	0.000324454	0.00947599
MCIDAS	3.75154	3.25114	1.23668	2.62893	0.00856534	0.0711517
GPR88	3872.5	3.27056	0.954692	3.42578	0.000613045	0.0141262
MAD2L1BP	42.5603	3.27855	0.790107	4.1495	3.33197e-05	0.00230332
FER1L6	11.9179	3.28374	0.908414	3.61481	0.000300569	0.00908585
MT3	9.75271	3.30083	0.905869	3.64383	0.000268608	0.00847899
HS6ST3	2.41948	3.31259	1.31777	2.5138	0.0119439	0.0867601
LHFPL3	3.3605	3.33134	1.03023	3.23358	0.00122249	0.0220871
PDX1	222.173	3.3513	1.59635	2.09935	0.0357863	0.165433
CIB3	2.96859	3.35193	1.37006	2.44656	0.0144227	0.0972876
ATRNL1	296.135	3.35748	0.809654	4.14681	3.37133e-05	0.00231011
PTH2R	54.8813	3.36123	1.06424	3.15833	0.00158677	0.0258448
SCGN	952.805	3.36446	0.670477	5.01802	5.22081e-07	0.000127552
CCDC64B	25.7445	3.36861	1.03395	3.25801	0.00112196	0.0208222
BANF2	18.2475	3.38614	1.01092	3.34955	0.000809429	0.0170113
POPDC3	4.67537	3.39483	1.24775	2.72076	0.00651315	0.0601564
SOAT2	369.84	3.40959	0.896661	3.80254	0.000143221	0.00574284
HCN1	2.2981	3.43012	1.4555	2.35666	0.01844	0.111968
CNTN1	18.495	3.44504	1.11163	3.09909	0.00194116	0.0294894
UCHL1	177.605	3.45754	0.750877	4.60467	4.13126e-06	0.000530079
AP1M2	1024.99	3.45833	0.841301	4.1107	3.94467e-05	0.00249479
ISL2	26.6301	3.47759	0.781923	4.44748	8.68832e-06	0.000890553
OR8A1	2.11739	3.48397	1.72378	2.02113	0.0432663	0.184143
USH1C	351.999	3.48781	1.06872	3.26354	0.00110031	0.0205703
PKP3	55.1914	3.49179	0.832431	4.1947	2.73239e-05	0.00198112
CST2	22.6428	3.49898	1.08211	3.23347	0.00122296	0.0220871
BEX2	458.277	3.50879	0.954154	3.67738	0.00023564	0.00784074
C2orf70	1.66767	3.52627	1.37016	2.57362	0.0100642	0.0785192
NQO1	10512.8	3.53449	0.866477	4.07915	4.52002e-05	0.00274199
MSC	777.452	3.55465	0.766635	4.63669	3.5403e-06	0.000481994
CA9	72.0367	3.57471	0.843374	4.23858	2.24939e-05	0.00175956
RIMBP2	6.41152	3.61072	1.39345	2.59121	0.00956402	0.0760979
MRGPRX3	1.76093	3.61838	1.81508	1.99351	0.0462052	0.19254
HS6ST2	8.35229	3.62156	0.947951	3.82041	0.000133232	0.00550047
DUSP13	40.0921	3.64186	1.0838	3.36028	0.000778626	0.016611
WNK2	488.525	3.66267	0.964958	3.79568	0.000147241	0.00584864
FIBCD1	13.4527	3.68446	0.793708	4.64209	3.44907e-06	0.000473186
LPAR3	8.94581	3.68742	1.24055	2.9724	0.00295481	0.0378313
CAPN6	108.271	3.71053	1.34045	2.76811	0.00563822	0.0552498
CDH17	20.308	3.71643	1.1302	3.28828	0.001008	0.0194774
DPP10	4.33344	3.72542	1.16762	3.1906	0.00141975	0.0242343
TUBAL3	8.23215	3.73398	1.35245	2.76091	0.00576413	0.0559321
FOXN1	1.40167	3.74841	1.88964	1.98366	0.0472938	0.195403
GPR27	37.1732	3.75934	0.960894	3.91234	9.14063e-05	0.00430017
CNR1	49.3337	3.79822	0.7229	5.25413	1.48722e-07	5.2009e-05
KCNF1	62.7158	3.80705	1.00791	3.77718	0.000158614	0.00609671
PAGE2B	6.80563	3.82877	1.12121	3.41484	0.000638185	0.0145923
SAGE1	2.37992	3.85736	1.66624	2.315	0.0206129	0.120027
PNLIP	2.03611	3.86471	1.91912	2.0138	0.0440308	0.186441
PITX1	248.601	3.91146	1.07867	3.6262	0.000287621	0.00889034
PPAP2C	1368.88	3.9323	0.814279	4.82918	1.37099e-06	0.000252078
SLC22A6	6.21068	3.9394	1.16181	3.39076	0.000697003	0.0155001
PHGR1	15.6211	3.96289	0.940619	4.21307	2.51927e-05	0.00191197
BTNL3	14.5893	3.97135	1.16681	3.4036	0.000665049	0.0150141
MAGEA8	5.79069	3.98043	1.20017	3.31656	0.000911331	0.0183036
FOLR1	56.2376	3.98799	0.837709	4.76058	1.93033e-06	0.00031703
SPOCK1	118.119	3.99746	0.614695	6.50316	7.86483e-11	1.55855e-07
EVPL	144.461	4.00549	0.887058	4.51547	6.31756e-06	0.000713124
FGF4	2.97175	4.01079	1.8397	2.18013	0.0292478	0.146691
XAGE5	11.752	4.01738	1.47858	2.71705	0.00658675	0.0606462
KLK13	2.64761	4.03236	1.34346	3.00146	0.00268685	0.0355779
GDF10	18.0435	4.08915	1.30718	3.12823	0.0017586	0.0275129
CLEC2L	20.4498	4.09946	1.23651	3.31535	0.000915275	0.0183621
MUC5B	115.115	4.11611	0.97203	4.23454	2.29015e-05	0.00177586
ACTL8	33.395	4.12692	1.22401	3.37165	0.000747199	0.0160946
GP2	96.3645	4.13777	1.33734	3.09402	0.00197463	0.0298202
AKNAD1	2.50379	4.14436	1.0721	3.86565	0.000110796	0.00489446
PRR15L	236.981	4.16533	0.694702	5.99585	2.02422e-09	1.8051e-06
SEZ6	41.275	4.21785	0.903837	4.6666	3.06221e-06	0.000433449
RDH8	19.3834	4.30617	1.16177	3.70655	0.000210104	0.00723398
KBTBD12	10.7889	4.32117	1.34487	3.21307	0.00131323	0.0231803
OLFM3	5.68297	4.36513	1.1865	3.679	0.000234151	0.00780576
TINAG	446.426	4.39017	1.38253	3.17545	0.00149604	0.0247742
GABRG3	17.2611	4.40294	0.958214	4.59494	4.32864e-06	0.000547527
DCC	17.4965	4.4429	1.00286	4.43024	9.41297e-06	0.000937879
WNT3A	28.991	4.4584	0.982695	4.53691	5.70838e-06	0.000661098
APOL5	80.2542	4.46796	0.765953	5.83321	5.43716e-09	3.59155e-06
POF1B	130.681	4.4959	0.782909	5.74255	9.32606e-09	5.73553e-06
NEFM	8.76645	4.4986	1.3481	3.337	0.000846881	0.0175222
CDH16	108.04	4.52412	0.979663	4.61804	3.87386e-06	0.000519475
ZNF695	15.7306	4.54916	0.846516	5.37399	7.70152e-08	2.92248e-05
RNF17	3.7861	4.55788	1.42879	3.19003	0.0014226	0.0242563
TFF1	3.8927	4.6016	1.66445	2.76465	0.00569847	0.0555671
SCGB1A1	4.22479	4.73145	1.84947	2.55828	0.0105193	0.0806236
PPP2R2C	81.5617	4.74181	1.06575	4.44928	8.61573e-06	0.000888217
CTAG2	90.764	4.76042	1.67492	2.84218	0.00448063	0.048108
TECRL	5.74138	4.77752	1.57797	3.02763	0.00246481	0.0340774
MYT1L	24.7765	4.85678	1.2983	3.74089	0.000183373	0.00670176
CDH18	5.49158	4.90467	1.18716	4.13144	3.60493e-05	0.00239288
ALX3	4.03794	5.07999	1.35166	3.75833	0.00017105	0.00636883
TUBA3C	19.603	5.25343	1.33425	3.93738	8.23775e-05	0.00400379
MS4A8	13.8757	5.35114	1.19377	4.48256	7.3754e-06	0.000787666
EYA4	33.1788	5.42165	1.16318	4.66104	3.14615e-06	0.000438372
GABRA2	10.3493	5.45572	2.27947	2.39341	0.0166925	0.105534
RP11-76C10.6	10.784	5.46515	1.27753	4.27789	1.88672e-05	0.00156083
MISP	215.786	5.53545	1.22557	4.51665	6.28261e-06	0.000713124
TM4SF20	96.904	5.84352	1.31494	4.44396	8.832e-06	0.000894993
S100P	3217.63	5.85892	0.92113	6.36058	2.00999e-10	3.25892e-07
BPIFA1	14.3363	6.05284	2.32836	2.59961	0.00933285	0.0750785
NAA11	21.7078	6.34006	1.37678	4.60499	4.12487e-06	0.000530079
MS4A10	9.23194	6.48296	1.87129	3.46442	0.000531367	0.0128437
MAGEB1	21.3984	6.48829	1.42076	4.56679	4.95251e-06	0.000600871
AGR2	577.887	7.07303	1.26938	5.57206	2.51751e-08	1.3606e-05
MEP1A	707.904	7.2095	1.0593	6.80589	1.00427e-11	2.23889e-08
PAGE2	65.6577	7.26358	2.13976	3.39458	0.000687351	0.0154102
LIN28B	35.8122	7.32424	1.88058	3.89467	9.8332e-05	0.00451998
NR0B1	45.5442	7.94356	1.63873	4.8474	1.25091e-06	0.000234842
MAGEA12	242.192	8.80335	1.71684	5.12764	2.93399e-07	8.72129e-05

## Sheet: enrich_RS1
Enrichment pathways in RS1
ONTOLOGY	ID	Description	GeneRatio	BgRatio	pvalue	p.adjust	qvalue	geneID	Count
BP	GO:0006958	complement activation, classical pathway	80/880	137/18670	3.1117e-70	1.4849e-66	1.28792e-66	C4BPA/C5/C8A/C9/CR1/CFI/IGHA1/IGHA2/IGHD/IGHG1/IGHG2/IGHG3/IGHG4/IGHM/IGKC/IGLC2/IGLC3/MBL2/IGKV1-5/IGHV6-1/IGHV5-51/IGHV4-61/IGHV4-59/IGHV4-39/IGHV4-34/IGHV4-31/IGHV4-28/IGHV4-4/IGHV3-74/IGHV3-73/IGHV3-72/IGHV3-66/IGHV3-64/IGHV3-53/IGHV3-49/IGHV3-48/IGHV3-33/IGHV3-30/IGHV3-23/IGHV3-21/IGHV3-20/IGHV3-15/IGHV3-13/IGHV3-11/IGHV3-7/IGHV2-70/IGHV2-26/IGHV2-5/IGHV1-69-2/IGHV1-69/IGHV1-58/IGHV1-24/IGHV…	80
BP	GO:0002455	humoral immune response mediated by circulating immunoglobulin	82/880	150/18670	1.00584e-68	2.39993e-65	2.08155e-65	C4BPA/C5/C8A/C9/CR1/HPX/CFI/IGHA1/IGHA2/IGHD/IGHG1/IGHG2/IGHG3/IGHG4/IGHM/IGKC/IGLC2/IGLC3/MBL2/PTPRC/IGKV1-5/IGHV6-1/IGHV5-51/IGHV4-61/IGHV4-59/IGHV4-39/IGHV4-34/IGHV4-31/IGHV4-28/IGHV4-4/IGHV3-74/IGHV3-73/IGHV3-72/IGHV3-66/IGHV3-64/IGHV3-53/IGHV3-49/IGHV3-48/IGHV3-33/IGHV3-30/IGHV3-23/IGHV3-21/IGHV3-20/IGHV3-15/IGHV3-13/IGHV3-11/IGHV3-7/IGHV2-70/IGHV2-26/IGHV2-5/IGHV1-69-2/IGHV1-69/IGHV1-58/IGH…	82
BP	GO:0006956	complement activation	87/880	175/18670	3.67859e-68	5.85142e-65	5.07517e-65	C4BPA/C5/C8A/C9/CD5L/CR1/FCN2/CFI/IGHA1/IGHA2/IGHD/IGHG1/IGHG2/IGHG3/IGHG4/IGHM/IGKC/IGLC2/IGLC3/KRT1/MBL2/CFP/FCN3/COLEC10/CFHR4/IGKV1-5/IGHV6-1/IGHV5-51/IGHV4-61/IGHV4-59/IGHV4-39/IGHV4-34/IGHV4-31/IGHV4-28/IGHV4-4/IGHV3-74/IGHV3-73/IGHV3-72/IGHV3-66/IGHV3-64/IGHV3-53/IGHV3-49/IGHV3-48/IGHV3-33/IGHV3-30/IGHV3-23/IGHV3-21/IGHV3-20/IGHV3-15/IGHV3-13/IGHV3-11/IGHV3-7/IGHV2-70/IGHV2-26/IGHV2-5/IGHV…	87
BP	GO:0072376	protein activation cascade	91/880	198/18670	2.25515e-67	2.6904e-64	2.33349e-64	C4BPA/C5/C8A/C9/CD5L/CR1/FCN2/FGA/GP1BA/GP5/CFI/IGHA1/IGHA2/IGHD/IGHG1/IGHG2/IGHG3/IGHG4/IGHM/IGKC/IGLC2/IGLC3/KLKB1/KRT1/MBL2/CFP/FCN3/COLEC10/CFHR4/IGKV1-5/IGHV6-1/IGHV5-51/IGHV4-61/IGHV4-59/IGHV4-39/IGHV4-34/IGHV4-31/IGHV4-28/IGHV4-4/IGHV3-74/IGHV3-73/IGHV3-72/IGHV3-66/IGHV3-64/IGHV3-53/IGHV3-49/IGHV3-48/IGHV3-33/IGHV3-30/IGHV3-23/IGHV3-21/IGHV3-20/IGHV3-15/IGHV3-13/IGHV3-11/IGHV3-7/IGHV2-70/I…	91
BP	GO:0002460	adaptive immune response based on somatic recombination of immune receptors built from immunoglobulin superfamily domains	114/880	361/18670	3.21121e-63	3.06478e-60	2.6582e-60	B2M/C4BPA/C5/C8A/C9/CD1D/CD8A/CD80/CR1/HPX/CFI/IGHA1/IGHA2/IGHD/IGHG1/IGHG2/IGHG3/IGHG4/IGHM/IGKC/IGLC2/IGLC3/IL1R1/IL7R/IL10/IL12B/IRF4/LY9/MBL2/PRF1/PRKCQ/PTPRC/SPN/TNFAIP3/IL18RAP/IL1RL1/CXCL13/CD226/LILRB1/RIPK3/IGKV1-5/IGHV6-1/IGHV5-51/IGHV4-61/IGHV4-59/IGHV4-39/IGHV4-34/IGHV4-31/IGHV4-28/IGHV4-4/IGHV3-74/IGHV3-73/IGHV3-72/IGHV3-66/IGHV3-64/IGHV3-53/IGHV3-49/IGHV3-48/IGHV3-33/IGHV3-30/IGHV3-…	114
BP	GO:0002449	lymphocyte mediated immunity	112/880	352/18670	1.73555e-62	1.38034e-59	1.19722e-59	B2M/C4BPA/C5/C8A/C9/CD1D/CD8A/CR1/GZMB/HPX/CFI/IGHA1/IGHA2/IGHD/IGHG1/IGHG2/IGHG3/IGHG4/IGHM/IGKC/IGLC2/IGLC3/IL1R1/IL7R/IL10/IL12B/KLRD1/SH2D1A/MBL2/PRF1/PTPRC/IL18RAP/NCR1/CD226/LILRB1/RIPK3/CD160/KLRK1/IGKV1-5/IGHV6-1/IGHV5-51/IGHV4-61/IGHV4-59/IGHV4-39/IGHV4-34/IGHV4-31/IGHV4-28/IGHV4-4/IGHV3-74/IGHV3-73/IGHV3-72/IGHV3-66/IGHV3-64/IGHV3-53/IGHV3-49/IGHV3-48/IGHV3-33/IGHV3-30/IGHV3-23/IGHV3-21…	112
BP	GO:0019724	B cell mediated immunity	88/880	221/18670	1.42966e-58	9.74622e-56	8.45328e-56	C4BPA/C5/C8A/C9/CR1/HPX/CFI/IGHA1/IGHA2/IGHD/IGHG1/IGHG2/IGHG3/IGHG4/IGHM/IGKC/IGLC2/IGLC3/IL10/MBL2/PTPRC/CD226/IGKV1-5/IGHV6-1/IGHV5-51/IGHV4-61/IGHV4-59/IGHV4-39/IGHV4-34/IGHV4-31/IGHV4-28/IGHV4-4/IGHV3-74/IGHV3-73/IGHV3-72/IGHV3-66/IGHV3-64/IGHV3-53/IGHV3-49/IGHV3-48/IGHV3-33/IGHV3-30/IGHV3-23/IGHV3-21/IGHV3-20/IGHV3-15/IGHV3-13/IGHV3-11/IGHV3-7/IGHV2-70/IGHV2-26/IGHV2-5/IGHV1-69-2/IGHV1-69/I…	88
BP	GO:0016064	immunoglobulin mediated immune response	87/880	218/18670	5.26838e-58	3.14259e-55	2.72569e-55	C4BPA/C5/C8A/C9/CR1/HPX/CFI/IGHA1/IGHA2/IGHD/IGHG1/IGHG2/IGHG3/IGHG4/IGHM/IGKC/IGLC2/IGLC3/IL10/MBL2/PTPRC/CD226/IGKV1-5/IGHV6-1/IGHV5-51/IGHV4-61/IGHV4-59/IGHV4-39/IGHV4-34/IGHV4-31/IGHV4-28/IGHV4-4/IGHV3-74/IGHV3-73/IGHV3-72/IGHV3-66/IGHV3-64/IGHV3-53/IGHV3-49/IGHV3-48/IGHV3-33/IGHV3-30/IGHV3-23/IGHV3-21/IGHV3-20/IGHV3-15/IGHV3-13/IGHV3-11/IGHV3-7/IGHV2-70/IGHV2-26/IGHV2-5/IGHV1-69-2/IGHV1-69/I…	87
BP	GO:0002429	immune response-activating cell surface receptor signaling pathway	118/880	473/18670	3.97233e-53	2.10622e-50	1.82681e-50	BLK/CD3E/CD3G/CD247/MS4A1/CD38/CD79A/CCR7/CR1/FPR2/FYN/GBP1/NCKAP1L/HLA-DRB5/IGHA1/IGHA2/IGHD/IGHG1/IGHG2/IGHG3/IGHG4/IGHM/IGKC/IGLC2/IGLC3/ITK/LCK/PAX5/PDE4B/PIK3CD/PRKCB/PRKCQ/PTPRC/TXK/ZAP70/NR4A3/GRAP2/TESPA1/CD226/CD160/KLRK1/PTPN22/STAP1/CYFIP2/IGKV1-5/IGHV6-1/IGHV5-51/IGHV4-61/IGHV4-59/IGHV4-39/IGHV4-34/IGHV4-31/IGHV4-28/IGHV4-4/IGHV3-74/IGHV3-73/IGHV3-72/IGHV3-66/IGHV3-64/IGHV3-53/IGHV3-4…	118
BP	GO:0006959	humoral immune response	103/880	356/18670	5.87517e-53	2.80363e-50	2.4317e-50	C4BPA/C5/C8A/C9/CD5L/MS4A1/CCR7/CR1/FCN2/FGA/CXCL2/HPX/CFI/IGHA1/IGHA2/IGHD/IGHG1/IGHG2/IGHG3/IGHG4/IGHM/IGKC/IGLC2/IGLC3/KRT1/KRT6A/LTF/SH2D1A/MBL2/CXCL9/PAX5/CFP/PPBP/PTPRC/CCL2/FCN3/CXCL13/COLEC10/CFHR4/IGKV1-5/IGHV6-1/IGHV5-51/IGHV4-61/IGHV4-59/IGHV4-39/IGHV4-34/IGHV4-31/IGHV4-28/IGHV4-4/IGHV3-74/IGHV3-73/IGHV3-72/IGHV3-66/IGHV3-64/IGHV3-53/IGHV3-49/IGHV3-48/IGHV3-33/IGHV3-30/IGHV3-23/IGHV3-2…	103
BP	GO:0050853	B cell receptor signaling pathway	64/880	129/18670	3.54843e-50	1.53938e-47	1.33516e-47	BLK/MS4A1/CD38/CD79A/NCKAP1L/IGHA1/IGHA2/IGHD/IGHG1/IGHG2/IGHG3/IGHG4/IGHM/IGKC/IGLC2/IGLC3/ITK/LCK/PAX5/PIK3CD/PRKCB/PTPRC/PTPN22/STAP1/IGHV6-1/IGHV5-51/IGHV4-61/IGHV4-59/IGHV4-39/IGHV4-34/IGHV4-31/IGHV4-28/IGHV4-4/IGHV3-74/IGHV3-73/IGHV3-72/IGHV3-66/IGHV3-64/IGHV3-53/IGHV3-49/IGHV3-48/IGHV3-33/IGHV3-30/IGHV3-23/IGHV3-21/IGHV3-20/IGHV3-15/IGHV3-13/IGHV3-11/IGHV3-7/IGHV2-70/IGHV2-26/IGHV2-5/IGHV1…	64
BP	GO:0051249	regulation of lymphocyte activation	113/880	485/18670	1.32792e-47	4.97285e-45	4.31316e-45	PRDM1/BMP4/CAMK4/RUNX3/CD1D/CD2/CD3E/CD5/CD6/CD80/TNFSF8/CD38/CCR7/CR1/EGR3/FYN/NCKAP1L/IGF1/IGF2/IGHA1/IGHA2/IGHD/IGHG1/IGHG2/IGHG3/IGHG4/IGHM/IGKC/IGLC2/IGLC3/IL6ST/IL7R/IL10/IL12B/IRF4/LCK/PRKCQ/PTPRC/RAC2/CCL2/CCL5/SPN/TNFAIP3/ZAP70/GRAP2/TOX/TESPA1/MERTK/LILRB1/RIPK3/CD160/IKZF3/KLRK1/PTPN22/PLA2G2D/SIT1/IGHV6-1/IGHV5-51/IGHV4-61/IGHV4-59/IGHV4-39/IGHV4-34/IGHV4-31/IGHV4-28/IGHV4-4/IGHV3-74/…	113
BP	GO:0006909	phagocytosis	99/880	369/18670	1.35472e-47	4.97285e-45	4.31316e-45	ANXA3/C4BPA/CD3G/CD247/DOCK2/FCN2/FPR2/FYN/NCKAP1L/IRF8/IGHA1/IGHA2/IGHD/IGHG1/IGHG2/IGHG3/IGHG4/IGHM/IGKC/IGLC2/IGLC3/IL2RB/LDLR/MBL2/PTPRC/CCL2/SLAMF1/ICAM5/FCN3/MARCO/MERTK/STAP1/CYFIP2/IGKV1-5/IGHV6-1/IGHV5-51/IGHV4-61/IGHV4-59/IGHV4-39/IGHV4-34/IGHV4-31/IGHV4-28/IGHV4-4/IGHV3-74/IGHV3-73/IGHV3-72/IGHV3-66/IGHV3-64/IGHV3-53/IGHV3-49/IGHV3-48/IGHV3-33/IGHV3-30/IGHV3-23/IGHV3-21/IGHV3-20/IGHV3-…	99
BP	GO:0006910	phagocytosis, recognition	51/880	84/18670	3.01356e-46	1.02719e-43	8.90926e-44	FCN2/IGHA1/IGHA2/IGHD/IGHG1/IGHG2/IGHG3/IGHG4/IGHM/IGKC/IGLC2/IGLC3/FCN3/IGHV6-1/IGHV5-51/IGHV4-61/IGHV4-59/IGHV4-39/IGHV4-34/IGHV4-31/IGHV4-28/IGHV4-4/IGHV3-74/IGHV3-73/IGHV3-72/IGHV3-66/IGHV3-64/IGHV3-53/IGHV3-49/IGHV3-48/IGHV3-33/IGHV3-30/IGHV3-23/IGHV3-21/IGHV3-20/IGHV3-15/IGHV3-13/IGHV3-11/IGHV3-7/IGHV2-70/IGHV2-26/IGHV2-5/IGHV1-69-2/IGHV1-69/IGHV1-58/IGHV1-24/IGHV1-18/IGHV1-3/IGLC7/CLEC7A/I…	51
BP	GO:0002920	regulation of humoral immune response	60/880	134/18670	9.5787e-44	3.0473e-41	2.64305e-41	C4BPA/C5/C8A/C9/CD5L/CCR7/CR1/HPX/CFI/IGHG1/IGHG2/IGHG3/IGHG4/IGKC/IGLC2/IGLC3/CFP/PTPRC/CXCL13/CFHR4/IGKV1-5/IGHV4-59/IGHV4-39/IGHV4-34/IGHV3-53/IGHV3-48/IGHV3-33/IGHV3-30/IGHV3-23/IGHV3-13/IGHV3-11/IGHV3-7/IGHV2-70/IGHV2-5/IGHV1-69/IGLV7-43/IGLV6-57/IGLV3-27/IGLV3-21/IGLV3-19/IGLV3-1/IGLV2-23/IGLV2-14/IGLV2-11/IGLV2-8/IGLV1-51/IGLV1-47/IGLV1-44/IGLV1-40/IGLC7/IGKV3D-20/IGKV3D-11/IGKV5-2/IGKV4-1…	60
BP	GO:0002696	positive regulation of leukocyte activation	96/880	380/18670	1.14803e-43	3.424e-41	2.96977e-41	RUNX3/CD1D/CD2/CD3E/CD5/CD6/CD80/CD38/CCR7/EGR3/FYN/NCKAP1L/IGF1/IGF2/IGHA1/IGHA2/IGHD/IGHG1/IGHG2/IGHG3/IGHG4/IGHM/IGKC/IGLC2/IGLC3/IL6ST/IL7R/IL10/IL12B/LCK/PRKCQ/PTPRC/CCL2/CCL3/CCL5/ZAP70/NR4A3/IL1RL1/GRAP2/TOX/TESPA1/CD226/LILRB1/CD160/KLRK1/STAP1/IGHV6-1/IGHV5-51/IGHV4-61/IGHV4-59/IGHV4-39/IGHV4-34/IGHV4-31/IGHV4-28/IGHV4-4/IGHV3-74/IGHV3-73/IGHV3-72/IGHV3-66/IGHV3-64/IGHV3-53/IGHV3-49/IGHV…	96
BP	GO:0030449	regulation of complement activation	56/880	115/18670	1.9856e-43	5.5737e-41	4.83429e-41	C4BPA/C5/C8A/C9/CD5L/CR1/CFI/IGHG1/IGHG2/IGHG3/IGHG4/IGKC/IGLC2/IGLC3/CFP/CFHR4/IGKV1-5/IGHV4-59/IGHV4-39/IGHV4-34/IGHV3-53/IGHV3-48/IGHV3-33/IGHV3-30/IGHV3-23/IGHV3-13/IGHV3-11/IGHV3-7/IGHV2-70/IGHV2-5/IGHV1-69/IGLV7-43/IGLV6-57/IGLV3-27/IGLV3-21/IGLV3-19/IGLV3-1/IGLV2-23/IGLV2-14/IGLV2-11/IGLV2-8/IGLV1-51/IGLV1-47/IGLV1-44/IGLV1-40/IGLC7/IGKV3D-20/IGKV3D-11/IGKV5-2/IGKV4-1/IGKV3-20/IGKV3-15/IGK…	56
BP	GO:2000257	regulation of protein activation cascade	56/880	116/18670	3.6715e-43	9.73355e-41	8.4423e-41	C4BPA/C5/C8A/C9/CD5L/CR1/CFI/IGHG1/IGHG2/IGHG3/IGHG4/IGKC/IGLC2/IGLC3/CFP/CFHR4/IGKV1-5/IGHV4-59/IGHV4-39/IGHV4-34/IGHV3-53/IGHV3-48/IGHV3-33/IGHV3-30/IGHV3-23/IGHV3-13/IGHV3-11/IGHV3-7/IGHV2-70/IGHV2-5/IGHV1-69/IGLV7-43/IGLV6-57/IGLV3-27/IGLV3-21/IGLV3-19/IGLV3-1/IGLV2-23/IGLV2-14/IGLV2-11/IGLV2-8/IGLV1-51/IGLV1-47/IGLV1-44/IGLV1-40/IGLC7/IGKV3D-20/IGKV3D-11/IGKV5-2/IGKV4-1/IGKV3-20/IGKV3-15/IGK…	56
BP	GO:0050867	positive regulation of cell activation	97/880	394/18670	4.63186e-43	1.16333e-40	1.009e-40	RUNX3/CD1D/CD2/CD3E/CD5/CD6/CD80/CD38/CCR7/EGR3/FYN/NCKAP1L/IGF1/IGF2/IGHA1/IGHA2/IGHD/IGHG1/IGHG2/IGHG3/IGHG4/IGHM/IGKC/IGLC2/IGLC3/IL6ST/IL7R/IL10/IL12B/LCK/PLEK/PRKCQ/PTPRC/CCL2/CCL3/CCL5/ZAP70/NR4A3/IL1RL1/GRAP2/TOX/TESPA1/CD226/LILRB1/CD160/KLRK1/STAP1/IGHV6-1/IGHV5-51/IGHV4-61/IGHV4-59/IGHV4-39/IGHV4-34/IGHV4-31/IGHV4-28/IGHV4-4/IGHV3-74/IGHV3-73/IGHV3-72/IGHV3-66/IGHV3-64/IGHV3-53/IGHV3-49…	97
BP	GO:0050851	antigen receptor-mediated signaling pathway	87/880	316/18670	8.09897e-43	1.93241e-40	1.67606e-40	BLK/CD3E/CD3G/CD247/MS4A1/CD38/CD79A/CCR7/FYN/GBP1/NCKAP1L/HLA-DRB5/IGHA1/IGHA2/IGHD/IGHG1/IGHG2/IGHG3/IGHG4/IGHM/IGKC/IGLC2/IGLC3/ITK/LCK/PAX5/PDE4B/PIK3CD/PRKCB/PRKCQ/PTPRC/TXK/ZAP70/GRAP2/TESPA1/CD226/CD160/PTPN22/STAP1/IGHV6-1/IGHV5-51/IGHV4-61/IGHV4-59/IGHV4-39/IGHV4-34/IGHV4-31/IGHV4-28/IGHV4-4/IGHV3-74/IGHV3-73/IGHV3-72/IGHV3-66/IGHV3-64/IGHV3-53/IGHV3-49/IGHV3-48/IGHV3-33/IGHV3-30/IGHV3-2…	87
BP	GO:0051251	positive regulation of lymphocyte activation	89/880	334/18670	1.57408e-42	3.5769e-40	3.10239e-40	RUNX3/CD1D/CD3E/CD5/CD6/CD80/CD38/CCR7/EGR3/FYN/NCKAP1L/IGF1/IGF2/IGHA1/IGHA2/IGHD/IGHG1/IGHG2/IGHG3/IGHG4/IGHM/IGKC/IGLC2/IGLC3/IL6ST/IL7R/IL12B/LCK/PRKCQ/PTPRC/CCL2/CCL5/ZAP70/GRAP2/TOX/TESPA1/LILRB1/CD160/KLRK1/IGHV6-1/IGHV5-51/IGHV4-61/IGHV4-59/IGHV4-39/IGHV4-34/IGHV4-31/IGHV4-28/IGHV4-4/IGHV3-74/IGHV3-73/IGHV3-72/IGHV3-66/IGHV3-64/IGHV3-53/IGHV3-49/IGHV3-48/IGHV3-33/IGHV3-30/IGHV3-23/IGHV3-2…	89
BP	GO:0002673	regulation of acute inflammatory response	62/880	159/18670	9.0515e-41	1.96335e-38	1.7029e-38	C4BPA/C5/C8A/C9/CD5L/CCR7/CR1/DNASE1L3/CFI/IGHG1/IGHG2/IGHG3/IGHG4/IGKC/IGLC2/IGLC3/IL6ST/KLKB1/CFP/PIK3CG/CFHR4/IGKV1-5/IGHV4-59/IGHV4-39/IGHV4-34/IGHV3-53/IGHV3-48/IGHV3-33/IGHV3-30/IGHV3-23/IGHV3-13/IGHV3-11/IGHV3-7/IGHV2-70/IGHV2-5/IGHV1-69/IGLV7-43/IGLV6-57/IGLV3-27/IGLV3-21/IGLV3-19/IGLV3-1/IGLV2-23/IGLV2-14/IGLV2-11/IGLV2-8/IGLV1-51/IGLV1-47/IGLV1-44/IGLV1-40/IGLC7/IGKV3D-20/IGKV3D-11/IGKV…	62
BP	GO:0002526	acute inflammatory response	71/880	220/18670	4.03908e-40	8.38022e-38	7.2685e-38	SERPINA3/C4BPA/C5/C8A/C9/CD5L/CD6/CCR7/CR1/DNASE1L3/HP/CFI/IGHG1/IGHG2/IGHG3/IGHG4/IGKC/IGLC2/IGLC3/IL6ST/KLKB1/MBL2/ORM1/ORM2/CFP/PIK3CG/SAA1/SAA2/CFHR4/IGKV1-5/IGHV4-59/IGHV4-39/IGHV4-34/IGHV3-53/IGHV3-48/IGHV3-33/IGHV3-30/IGHV3-23/IGHV3-13/IGHV3-11/IGHV3-7/IGHV2-70/IGHV2-5/IGHV1-69/IGLV7-43/IGLV6-57/IGLV3-27/IGLV3-21/IGLV3-19/IGLV3-1/IGLV2-23/IGLV2-14/IGLV2-11/IGLV2-8/IGLV1-51/IGLV1-47/IGLV1-4…	71
BP	GO:0006911	phagocytosis, engulfment	52/880	118/18670	1.33268e-37	2.64981e-35	2.29828e-35	NCKAP1L/IGHA1/IGHA2/IGHD/IGHG1/IGHG2/IGHG3/IGHG4/IGHM/IGKC/IGLC2/IGLC3/MARCO/STAP1/IGHV6-1/IGHV5-51/IGHV4-61/IGHV4-59/IGHV4-39/IGHV4-34/IGHV4-31/IGHV4-28/IGHV4-4/IGHV3-74/IGHV3-73/IGHV3-72/IGHV3-66/IGHV3-64/IGHV3-53/IGHV3-49/IGHV3-48/IGHV3-33/IGHV3-30/IGHV3-23/IGHV3-21/IGHV3-20/IGHV3-15/IGHV3-13/IGHV3-11/IGHV3-7/IGHV2-70/IGHV2-26/IGHV2-5/IGHV1-69-2/IGHV1-69/IGHV1-58/IGHV1-24/IGHV1-18/IGHV1-3/IGLC…	52
BP	GO:0050900	leukocyte migration	102/880	499/18670	1.50002e-37	2.86324e-35	2.48341e-35	ADD2/C5/CD2/CCR5/CCR7/CNR2/FPR2/FYN/CXCR3/GPR15/GPR18/CXCL2/NCKAP1L/IGHA1/IGHA2/IGHM/IGKC/IGLC2/IGLC3/IL1R1/IL1RN/IL10/ITGA4/ITGB7/LCK/CXCL9/PDE4B/PIK3CD/PIK3CG/PPBP/RAC2/SAA1/CCL2/CCL3/CCL4/CCL5/CCL8/CCL18/CXCL12/SELE/SPN/TEK/THBD/ZAP70/CD84/CXCL14/MERTK/CXCL13/RIPK3/KLRK1/STAP1/IGKV1-5/IGHV4-59/IGHV4-39/IGHV4-34/IGHV3-53/IGHV3-48/IGHV3-33/IGHV3-30/IGHV3-23/IGHV3-13/IGHV3-11/IGHV3-7/IGHV2-70/IGH…	102
BP	GO:0050864	regulation of B cell activation	63/880	184/18670	1.96396e-37	3.60462e-35	3.12643e-35	CD38/NCKAP1L/IGHA1/IGHA2/IGHD/IGHG1/IGHG2/IGHG3/IGHG4/IGHM/IGKC/IGLC2/IGLC3/IL10/PTPRC/TNFAIP3/IKZF3/IGHV6-1/IGHV5-51/IGHV4-61/IGHV4-59/IGHV4-39/IGHV4-34/IGHV4-31/IGHV4-28/IGHV4-4/IGHV3-74/IGHV3-73/IGHV3-72/IGHV3-66/IGHV3-64/IGHV3-53/IGHV3-49/IGHV3-48/IGHV3-33/IGHV3-30/IGHV3-23/IGHV3-21/IGHV3-20/IGHV3-15/IGHV3-13/IGHV3-11/IGHV3-7/IGHV2-70/IGHV2-26/IGHV2-5/IGHV1-69-2/IGHV1-69/IGHV1-58/IGHV1-24/IGH…	63
BP	GO:0099024	plasma membrane invagination	53/880	127/18670	8.29646e-37	1.46632e-34	1.2718e-34	NCKAP1L/IGHA1/IGHA2/IGHD/IGHG1/IGHG2/IGHG3/IGHG4/IGHM/IGKC/IGLC2/IGLC3/MARCO/STAP1/IGHV6-1/IGHV5-51/IGHV4-61/IGHV4-59/IGHV4-39/IGHV4-34/IGHV4-31/IGHV4-28/IGHV4-4/IGHV3-74/IGHV3-73/IGHV3-72/IGHV3-66/IGHV3-64/IGHV3-53/IGHV3-49/IGHV3-48/IGHV3-33/IGHV3-30/IGHV3-23/IGHV3-21/IGHV3-20/IGHV3-15/IGHV3-13/IGHV3-11/IGHV3-7/IGHV2-70/IGHV2-26/IGHV2-5/IGHV1-69-2/IGHV1-69/IGHV1-58/IGHV1-24/IGHV1-18/IGHV1-3/IGLC…	53
BP	GO:0050871	positive regulation of B cell activation	55/880	142/18670	4.35047e-36	7.41444e-34	6.43084e-34	CD38/NCKAP1L/IGHA1/IGHA2/IGHD/IGHG1/IGHG2/IGHG3/IGHG4/IGHM/IGKC/IGLC2/IGLC3/PTPRC/IGHV6-1/IGHV5-51/IGHV4-61/IGHV4-59/IGHV4-39/IGHV4-34/IGHV4-31/IGHV4-28/IGHV4-4/IGHV3-74/IGHV3-73/IGHV3-72/IGHV3-66/IGHV3-64/IGHV3-53/IGHV3-49/IGHV3-48/IGHV3-33/IGHV3-30/IGHV3-23/IGHV3-21/IGHV3-20/IGHV3-15/IGHV3-13/IGHV3-11/IGHV3-7/IGHV2-70/IGHV2-26/IGHV2-5/IGHV1-69-2/IGHV1-69/IGHV1-58/IGHV1-24/IGHV1-18/IGHV1-3/IGLC7…	55
BP	GO:0002697	regulation of immune effector process	95/880	458/18670	1.57662e-35	2.56383e-33	2.22371e-33	B2M/C4BPA/C5/C8A/C9/CD1D/CD5L/CD80/CR1/DNASE1L3/HPX/CFI/IFIT1/IGHG1/IGHG2/IGHG3/IGHG4/IGKC/IGLC2/IGLC3/IL1R1/IL7R/IL10/IL12B/IRF4/SH2D1A/CFP/PTPRC/RAC2/TNFAIP3/NR4A3/IL18RAP/CD84/NCR1/TSPAN32/CD226/LILRB1/CFHR4/RIPK3/CD160/KLRK1/IGKV1-5/IGHV4-59/IGHV4-39/IGHV4-34/IGHV3-53/IGHV3-48/IGHV3-33/IGHV3-30/IGHV3-23/IGHV3-13/IGHV3-11/IGHV3-7/IGHV2-70/IGHV2-5/IGHV1-69/IGLV7-43/IGLV6-57/IGLV3-27/IGLV3-21/IG…	95
BP	GO:0002431	Fc receptor mediated stimulatory signaling pathway	55/880	145/18670	1.6118e-35	2.56383e-33	2.22371e-33	CD3G/CD247/FYN/NCKAP1L/IGHG1/IGHG2/IGHG3/IGHG4/IGKC/IGLC2/IGLC3/PTPRC/NR4A3/CD226/CYFIP2/IGKV1-5/IGHV4-59/IGHV4-39/IGHV4-34/IGHV3-53/IGHV3-48/IGHV3-33/IGHV3-30/IGHV3-23/IGHV3-13/IGHV3-11/IGHV3-7/IGHV2-70/IGHV2-5/IGHV1-69/IGLV7-43/IGLV6-57/IGLV3-27/IGLV3-21/IGLV3-19/IGLV3-1/IGLV2-23/IGLV2-14/IGLV2-11/IGLV2-8/IGLV1-51/IGLV1-47/IGLV1-44/IGLV1-40/IGLC7/IGKV3D-20/IGKV3D-11/IGKV5-2/IGKV4-1/IGKV3-20/IGK…	55
BP	GO:0010324	membrane invagination	53/880	135/18670	3.60556e-35	5.55023e-33	4.81394e-33	NCKAP1L/IGHA1/IGHA2/IGHD/IGHG1/IGHG2/IGHG3/IGHG4/IGHM/IGKC/IGLC2/IGLC3/MARCO/STAP1/IGHV6-1/IGHV5-51/IGHV4-61/IGHV4-59/IGHV4-39/IGHV4-34/IGHV4-31/IGHV4-28/IGHV4-4/IGHV3-74/IGHV3-73/IGHV3-72/IGHV3-66/IGHV3-64/IGHV3-53/IGHV3-49/IGHV3-48/IGHV3-33/IGHV3-30/IGHV3-23/IGHV3-21/IGHV3-20/IGHV3-15/IGHV3-13/IGHV3-11/IGHV3-7/IGHV2-70/IGHV2-26/IGHV2-5/IGHV1-69-2/IGHV1-69/IGHV1-58/IGHV1-24/IGHV1-18/IGHV1-3/IGLC…	53
BP	GO:0002377	immunoglobulin production	62/880	193/18670	5.27512e-35	7.86653e-33	6.82296e-33	HPX/IGKC/IL7R/IL10/PTPRC/ITM2A/IGKV1-5/TRAV19/TRAV14DV4/TRAV9-2/TRAV2/IGLV10-54/IGLV9-49/IGLV8-61/IGLV7-46/IGLV7-43/IGLV6-57/IGLV5-45/IGLV5-37/IGLV4-69/IGLV4-60/IGLV3-27/IGLV3-21/IGLV3-19/IGLV3-10/IGLV3-9/IGLV3-1/IGLV2-23/IGLV2-18/IGLV2-14/IGLV2-11/IGLV2-8/IGLV1-51/IGLV1-47/IGLV1-44/IGLV1-40/IGLV1-36/IGKV3D-20/IGKV3D-11/IGKV2D-29/IGKV1D-13/IGKV1D-8/IGKV6-21/IGKV5-2/IGKV4-1/IGKV3-20/IGKV3-15/IGKV2…	62
BP	GO:0002433	immune response-regulating cell surface receptor signaling pathway involved in phagocytosis	53/880	139/18670	2.11433e-34	2.96753e-32	2.57386e-32	CD3G/CD247/FYN/NCKAP1L/IGHG1/IGHG2/IGHG3/IGHG4/IGKC/IGLC2/IGLC3/PTPRC/CYFIP2/IGKV1-5/IGHV4-59/IGHV4-39/IGHV4-34/IGHV3-53/IGHV3-48/IGHV3-33/IGHV3-30/IGHV3-23/IGHV3-13/IGHV3-11/IGHV3-7/IGHV2-70/IGHV2-5/IGHV1-69/IGLV7-43/IGLV6-57/IGLV3-27/IGLV3-21/IGLV3-19/IGLV3-1/IGLV2-23/IGLV2-14/IGLV2-11/IGLV2-8/IGLV1-51/IGLV1-47/IGLV1-44/IGLV1-40/IGLC7/IGKV3D-20/IGKV3D-11/IGKV5-2/IGKV4-1/IGKV3-20/IGKV3-15/IGKV2-…	53
BP	GO:0038096	Fc-gamma receptor signaling pathway involved in phagocytosis	53/880	139/18670	2.11433e-34	2.96753e-32	2.57386e-32	CD3G/CD247/FYN/NCKAP1L/IGHG1/IGHG2/IGHG3/IGHG4/IGKC/IGLC2/IGLC3/PTPRC/CYFIP2/IGKV1-5/IGHV4-59/IGHV4-39/IGHV4-34/IGHV3-53/IGHV3-48/IGHV3-33/IGHV3-30/IGHV3-23/IGHV3-13/IGHV3-11/IGHV3-7/IGHV2-70/IGHV2-5/IGHV1-69/IGLV7-43/IGLV6-57/IGLV3-27/IGLV3-21/IGLV3-19/IGLV3-1/IGLV2-23/IGLV2-14/IGLV2-11/IGLV2-8/IGLV1-51/IGLV1-47/IGLV1-44/IGLV1-40/IGLC7/IGKV3D-20/IGKV3D-11/IGKV5-2/IGKV4-1/IGKV3-20/IGKV3-15/IGKV2-…	53
BP	GO:0070613	regulation of protein processing	59/880	180/18670	6.60267e-34	9.00227e-32	7.80803e-32	C4BPA/C5/C8A/C9/CD5L/CR1/CFI/IGHG1/IGHG2/IGHG3/IGHG4/IGKC/IGLC2/IGLC3/KLKB1/CFP/CST7/CFHR4/IGKV1-5/IGHV4-59/IGHV4-39/IGHV4-34/IGHV3-53/IGHV3-48/IGHV3-33/IGHV3-30/IGHV3-23/IGHV3-13/IGHV3-11/IGHV3-7/IGHV2-70/IGHV2-5/IGHV1-69/IGLV7-43/IGLV6-57/IGLV3-27/IGLV3-21/IGLV3-19/IGLV3-1/IGLV2-23/IGLV2-14/IGLV2-11/IGLV2-8/IGLV1-51/IGLV1-47/IGLV1-44/IGLV1-40/IGLC7/IGKV3D-20/IGKV3D-11/IGKV5-2/IGKV4-1/IGKV3-20/I…	59
BP	GO:0038094	Fc-gamma receptor signaling pathway	53/880	142/18670	7.60591e-34	1.00821e-31	8.74457e-32	CD3G/CD247/FYN/NCKAP1L/IGHG1/IGHG2/IGHG3/IGHG4/IGKC/IGLC2/IGLC3/PTPRC/CYFIP2/IGKV1-5/IGHV4-59/IGHV4-39/IGHV4-34/IGHV3-53/IGHV3-48/IGHV3-33/IGHV3-30/IGHV3-23/IGHV3-13/IGHV3-11/IGHV3-7/IGHV2-70/IGHV2-5/IGHV1-69/IGLV7-43/IGLV6-57/IGLV3-27/IGLV3-21/IGLV3-19/IGLV3-1/IGLV2-23/IGLV2-14/IGLV2-11/IGLV2-8/IGLV1-51/IGLV1-47/IGLV1-44/IGLV1-40/IGLC7/IGKV3D-20/IGKV3D-11/IGKV5-2/IGKV4-1/IGKV3-20/IGKV3-15/IGKV2-…	53
BP	GO:0042113	B cell activation	76/880	310/18670	1.09688e-33	1.41467e-31	1.227e-31	MS4A1/CD38/CD79A/NCKAP1L/IGHA1/IGHA2/IGHD/IGHG1/IGHG2/IGHG3/IGHG4/IGHM/IGKC/IGLC2/IGLC3/IL7R/IL10/ITGA4/PIK3CD/PRKCB/PTPRC/TNFAIP3/ZAP70/ITM2A/HDAC9/IKZF3/IGHV6-1/IGHV5-51/IGHV4-61/IGHV4-59/IGHV4-39/IGHV4-34/IGHV4-31/IGHV4-28/IGHV4-4/IGHV3-74/IGHV3-73/IGHV3-72/IGHV3-66/IGHV3-64/IGHV3-53/IGHV3-49/IGHV3-48/IGHV3-33/IGHV3-30/IGHV3-23/IGHV3-21/IGHV3-20/IGHV3-15/IGHV3-13/IGHV3-11/IGHV3-7/IGHV2-70/IGHV…	76
BP	GO:0002440	production of molecular mediator of immune response	73/880	286/18670	1.25936e-33	1.58149e-31	1.37169e-31	B2M/HPX/IGKC/IL1R1/IL7R/IL10/IL12B/PTPRC/NR4A3/IL18RAP/ITM2A/CD226/LILRB1/CD160/IGKV1-5/TRAV19/TRAV14DV4/TRAV9-2/TRAV2/IGLV10-54/IGLV9-49/IGLV8-61/IGLV7-46/IGLV7-43/IGLV6-57/IGLV5-45/IGLV5-37/IGLV4-69/IGLV4-60/IGLV3-27/IGLV3-21/IGLV3-19/IGLV3-10/IGLV3-9/IGLV3-1/IGLV2-23/IGLV2-18/IGLV2-14/IGLV2-11/IGLV2-8/IGLV1-51/IGLV1-47/IGLV1-44/IGLV1-40/IGLV1-36/IGKV3D-20/IGKV3D-11/IGKV2D-29/IGKV1D-13/IGKV1D-8…	73
BP	GO:1903317	regulation of protein maturation	59/880	182/18670	1.32586e-33	1.62231e-31	1.40709e-31	C4BPA/C5/C8A/C9/CD5L/CR1/CFI/IGHG1/IGHG2/IGHG3/IGHG4/IGKC/IGLC2/IGLC3/KLKB1/CFP/CST7/CFHR4/IGKV1-5/IGHV4-59/IGHV4-39/IGHV4-34/IGHV3-53/IGHV3-48/IGHV3-33/IGHV3-30/IGHV3-23/IGHV3-13/IGHV3-11/IGHV3-7/IGHV2-70/IGHV2-5/IGHV1-69/IGLV7-43/IGLV6-57/IGLV3-27/IGLV3-21/IGLV3-19/IGLV3-1/IGLV2-23/IGLV2-14/IGLV2-11/IGLV2-8/IGLV1-51/IGLV1-47/IGLV1-44/IGLV1-40/IGLC7/IGKV3D-20/IGKV3D-11/IGKV5-2/IGKV4-1/IGKV3-20/I…	59
BP	GO:0008037	cell recognition	62/880	215/18670	5.66792e-32	6.76183e-30	5.86481e-30	CD5/CD6/CCR7/DOCK2/FCN2/IGHA1/IGHA2/IGHD/IGHG1/IGHG2/IGHG3/IGHG4/IGHM/IGKC/IGLC2/IGLC3/PRF1/FCN3/CLEC4M/CD226/IGHV6-1/IGHV5-51/IGHV4-61/IGHV4-59/IGHV4-39/IGHV4-34/IGHV4-31/IGHV4-28/IGHV4-4/IGHV3-74/IGHV3-73/IGHV3-72/IGHV3-66/IGHV3-64/IGHV3-53/IGHV3-49/IGHV3-48/IGHV3-33/IGHV3-30/IGHV3-23/IGHV3-21/IGHV3-20/IGHV3-15/IGHV3-13/IGHV3-11/IGHV3-7/IGHV2-70/IGHV2-26/IGHV2-5/IGHV1-69-2/IGHV1-69/IGHV1-58/IGH…	62
BP	GO:0050727	regulation of inflammatory response	93/880	485/18670	6.04663e-32	7.03769e-30	6.10407e-30	C4BPA/C5/C8A/C9/CD5L/CD6/CCR7/CNR2/CR1/DNASE1L3/ESR1/FABP4/FPR2/GPR17/CFI/IGF1/IGHG1/IGHG2/IGHG3/IGHG4/IGKC/IGLC2/IGLC3/IL1R1/IL6ST/IL10/IL12B/KLKB1/KRT1/LDLR/MMP3/CFP/PIK3CG/PTPRC/SAA1/CCL3/CCL5/CCL18/SELE/TEK/TNFAIP3/CST7/SOCS3/IL1RL1/CFHR4/STAP1/IGKV1-5/IGHV4-59/IGHV4-39/IGHV4-34/IGHV3-53/IGHV3-48/IGHV3-33/IGHV3-30/IGHV3-23/IGHV3-13/IGHV3-11/IGHV3-7/IGHV2-70/IGHV2-5/IGHV1-69/IGLV7-43/IGLV6-57/…	93
BP	GO:0042742	defense response to bacterium	75/880	330/18670	6.65153e-31	7.55741e-29	6.55485e-29	ANXA3/TNFSF8/FCN2/FGA/FPR2/HP/IRF8/IGHA1/IGHA2/IGHD/IGHG1/IGHG2/IGHG3/IGHG4/IGHM/IGKC/IGLC2/IGLC3/IL10/IL12B/KRT6A/LTF/MBL2/CFP/PPBP/SPN/ISG15/CXCL13/CD160/KLRK1/IGHV6-1/IGHV5-51/IGHV4-61/IGHV4-59/IGHV4-39/IGHV4-34/IGHV4-31/IGHV4-28/IGHV4-4/IGHV3-74/IGHV3-73/IGHV3-72/IGHV3-66/IGHV3-64/IGHV3-53/IGHV3-49/IGHV3-48/IGHV3-33/IGHV3-30/IGHV3-23/IGHV3-21/IGHV3-20/IGHV3-15/IGHV3-13/IGHV3-11/IGHV3-7/IGHV2-…	75
BP	GO:0038093	Fc receptor signaling pathway	57/880	241/18670	1.21701e-24	1.3506e-22	1.17143e-22	CD3G/CD247/FYN/NCKAP1L/IGHG1/IGHG2/IGHG3/IGHG4/IGKC/IGLC2/IGLC3/ITK/PRKCQ/PTPRC/NR4A3/GRAP2/CYFIP2/IGKV1-5/IGHV4-59/IGHV4-39/IGHV4-34/IGHV3-53/IGHV3-48/IGHV3-33/IGHV3-30/IGHV3-23/IGHV3-13/IGHV3-11/IGHV3-7/IGHV2-70/IGHV2-5/IGHV1-69/IGLV7-43/IGLV6-57/IGLV3-27/IGLV3-21/IGLV3-19/IGLV3-1/IGLV2-23/IGLV2-14/IGLV2-11/IGLV2-8/IGLV1-51/IGLV1-47/IGLV1-44/IGLV1-40/IGLC7/IGKV3D-20/IGKV3D-11/IGKV5-2/IGKV4-1/IG…	57
BP	GO:0006898	receptor-mediated endocytosis	65/880	316/18670	2.61637e-24	2.83757e-22	2.46114e-22	ALB/B2M/FPR2/HBA1/HBA2/HBB/HP/HPX/IGHA1/IGHA2/IGKC/IGLC2/IGLC3/ITGA4/LDLR/SAA1/SELE/SORL1/MARCO/LILRB1/IGKV1-5/IGHV4-59/IGHV4-39/IGHV4-34/IGHV3-53/IGHV3-48/IGHV3-33/IGHV3-30/IGHV3-23/IGHV3-13/IGHV3-11/IGHV3-7/IGHV2-70/IGHV2-5/IGHV1-69/IGLV7-43/IGLV6-57/IGLV3-27/IGLV3-21/IGLV3-19/IGLV3-1/IGLV2-23/IGLV2-14/IGLV2-11/IGLV2-8/IGLV1-51/IGLV1-47/IGLV1-44/IGLV1-40/IGLC7/IGKV3D-20/IGKV3D-11/IGKV5-2/IGKV4-…	65
BP	GO:0038095	Fc-epsilon receptor signaling pathway	47/880	169/18670	9.43107e-24	1.00011e-21	8.67438e-22	IGKC/IGLC2/IGLC3/ITK/PRKCQ/NR4A3/GRAP2/IGKV1-5/IGHV4-59/IGHV4-39/IGHV4-34/IGHV3-53/IGHV3-48/IGHV3-33/IGHV3-30/IGHV3-23/IGHV3-13/IGHV3-11/IGHV3-7/IGHV2-70/IGHV2-5/IGHV1-69/IGLV7-43/IGLV6-57/IGLV3-27/IGLV3-21/IGLV3-19/IGLV3-1/IGLV2-23/IGLV2-14/IGLV2-11/IGLV2-8/IGLV1-51/IGLV1-47/IGLV1-44/IGLV1-40/IGLC7/IGKV3D-20/IGKV3D-11/IGKV5-2/IGKV4-1/IGKV3-20/IGKV3-15/IGKV2-30/IGKV1-17/IGKV1-16/IGKV1-12	47
BP	GO:0016485	protein processing	64/880	328/18670	1.21326e-22	1.25862e-20	1.09165e-20	C4BPA/C5/C8A/C9/CD5L/CR1/ENPEP/FGA/CFI/IGHG1/IGHG2/IGHG3/IGHG4/IGKC/IGLC2/IGLC3/KLK1/KLKB1/CFP/CST7/CORIN/CFHR4/CYFIP2/IGKV1-5/IGHV4-59/IGHV4-39/IGHV4-34/IGHV3-53/IGHV3-48/IGHV3-33/IGHV3-30/IGHV3-23/IGHV3-13/IGHV3-11/IGHV3-7/IGHV2-70/IGHV2-5/IGHV1-69/IGLV7-43/IGLV6-57/IGLV3-27/IGLV3-21/IGLV3-19/IGLV3-1/IGLV2-23/IGLV2-14/IGLV2-11/IGLV2-8/IGLV1-51/IGLV1-47/IGLV1-44/IGLV1-40/IGLC7/IGKV3D-20/IGKV3D-1…	64
BP	GO:0042110	T cell activation	73/880	464/18670	6.21384e-20	6.30903e-18	5.47207e-18	RHOH/B2M/PRDM1/BMP4/CAMK4/RUNX2/RUNX3/CD1D/CD2/CD3E/CD3G/CD5/CD6/CD8A/CD8B/CD80/TNFSF8/CCR7/CR1/DOCK2/EGR3/FYN/GPR18/NCKAP1L/IGF1/IGF2/IL6ST/IL7R/IL10/IL12B/IRF4/ITK/LCK/LY9/PIK3CD/PIK3CG/PRKCQ/PTPRC/RAC2/CCL2/CCL5/SPN/ZAP70/EOMES/GRAP2/TESPA1/LILRB1/RIPK3/CD160/KLRK1/PTPN22/PLA2G2D/SIT1/CD274/ICOS/TBX21/FOXP3/SASH3/LAX1/SIRPG/CLEC7A/BCL11B/DOCK8/SLA2/RSAD2/SLAMF6/TNFRSF13C/BTLA/TIGIT/CLEC4G/THEM…	73
BP	GO:0051604	protein maturation	66/880	397/18670	2.10758e-19	2.09529e-17	1.81733e-17	C4BPA/C5/C8A/C9/CD5L/CR1/ENPEP/FGA/CFI/IGHG1/IGHG2/IGHG3/IGHG4/IGKC/IGLC2/IGLC3/KLK1/KLKB1/CFP/SORL1/CST7/CORIN/CFHR4/CYFIP2/IGKV1-5/IGHV4-59/IGHV4-39/IGHV4-34/IGHV3-53/IGHV3-48/IGHV3-33/IGHV3-30/IGHV3-23/IGHV3-13/IGHV3-11/IGHV3-7/IGHV2-70/IGHV2-5/IGHV1-69/IGLV7-43/IGLV6-57/IGLV3-27/IGLV3-21/IGLV3-19/IGLV3-1/IGLV2-23/IGLV2-14/IGLV2-11/IGLV2-8/IGLV1-51/IGLV1-47/IGLV1-44/IGLV1-40/IGLC7/IGKV3D-20/IG…	66
BP	GO:0032609	interferon-gamma production	32/880	113/18670	7.72757e-17	7.52571e-15	6.52735e-15	CD2/CD3E/CCR7/IRF8/IL1R1/IL10/IL12B/IL12RB2/ITK/PDE4B/SPN/TXK/EOMES/IL18RAP/IL1RL1/ISG15/CD226/LILRB1/RIPK3/CD160/KLRK1/PTPN22/CD274/FOXP3/TLR8/CD244/SASH3/CLEC7A/SLAMF6/TNFRSF13C/CCR2/KLRC4-KLRK1	32
BP	GO:0050863	regulation of T cell activation	54/880	314/18670	9.7338e-17	9.28994e-15	8.05754e-15	PRDM1/BMP4/CAMK4/RUNX3/CD1D/CD2/CD3E/CD5/CD6/CD80/TNFSF8/CCR7/CR1/EGR3/FYN/NCKAP1L/IGF1/IGF2/IL6ST/IL7R/IL10/IL12B/IRF4/LCK/PRKCQ/PTPRC/RAC2/CCL2/CCL5/SPN/ZAP70/GRAP2/TESPA1/LILRB1/RIPK3/CD160/KLRK1/PTPN22/PLA2G2D/SIT1/CD274/ICOS/TBX21/FOXP3/SASH3/LAX1/SIRPG/DOCK8/TNFRSF13C/BTLA/TIGIT/CLEC4G/CCR2/KLRC4-KLRK1	54
BP	GO:0030098	lymphocyte differentiation	57/880	353/18670	2.5545e-16	2.39021e-14	2.07313e-14	RHOH/B2M/PRDM1/BMP4/CAMK4/RUNX2/RUNX3/CD1D/CD2/CD3E/CD3G/CD8A/MS4A1/CD80/TNFSF8/CD79A/CCR7/CR1/DOCK2/EGR3/GPR18/NCKAP1L/IL7R/IL10/IL12B/IRF4/ITGA4/ITK/LCK/LY9/PIK3CD/PTPRC/SPN/ZAP70/EOMES/LY6D/ITM2A/HDAC9/TOX/TESPA1/IKZF1/MERTK/RIPK3/IKZF3/PTPN22/PLA2G2D/TBX21/FOXP3/SASH3/DOCK10/BCL11B/RSAD2/SLAMF6/FCRL3/DOCK11/THEMIS/CCR2	57
BP	GO:0007159	leukocyte cell-cell adhesion	53/880	337/18670	9.05821e-15	8.31265e-13	7.20989e-13	ADD2/BMP4/RUNX3/CD1D/CD3E/CD5/CD6/CD80/CCR7/EGR3/FYN/NCKAP1L/IGF1/IGF2/IL6ST/IL7R/IL10/IL12B/ITGA4/ITGB7/LCK/PRKCQ/PTPRC/RAC2/CCL2/CCL5/CXCL12/SELE/SPN/ZAP70/NR4A3/GRAP2/TESPA1/CLEC4M/LILRB1/CD160/KLRK1/PTPN22/PLA2G2D/CD274/ICOS/TBX21/FOXP3/SASH3/LAX1/SIRPG/DOCK8/TNFRSF13C/BTLA/TIGIT/CLEC4G/CCR2/KLRC4-KLRK1	53
BP	GO:0032649	regulation of interferon-gamma production	28/880	101/18670	1.2112e-14	1.09053e-12	9.45863e-13	CD2/CD3E/CCR7/IRF8/IL1R1/IL10/IL12B/IL12RB2/PDE4B/TXK/IL1RL1/ISG15/CD226/LILRB1/RIPK3/CD160/KLRK1/PTPN22/CD274/FOXP3/TLR8/CD244/SASH3/CLEC7A/SLAMF6/TNFRSF13C/CCR2/KLRC4-KLRK1	28
BP	GO:0030217	T cell differentiation	43/880	240/18670	3.14614e-14	2.78025e-12	2.41143e-12	RHOH/B2M/PRDM1/BMP4/CAMK4/RUNX2/RUNX3/CD1D/CD2/CD3E/CD3G/CD8A/CD80/TNFSF8/CCR7/CR1/DOCK2/EGR3/GPR18/NCKAP1L/IL7R/IL12B/IRF4/ITK/LCK/LY9/PIK3CD/PTPRC/SPN/ZAP70/EOMES/TESPA1/RIPK3/PTPN22/PLA2G2D/TBX21/FOXP3/SASH3/BCL11B/RSAD2/SLAMF6/THEMIS/CCR2	43
BP	GO:1903037	regulation of leukocyte cell-cell adhesion	48/880	304/18670	1.46505e-13	1.27113e-11	1.10251e-11	BMP4/RUNX3/CD1D/CD3E/CD5/CD6/CD80/CCR7/EGR3/FYN/NCKAP1L/IGF1/IGF2/IL6ST/IL7R/IL10/IL12B/ITGA4/LCK/PRKCQ/PTPRC/CCL2/CCL5/CXCL12/SPN/ZAP70/NR4A3/GRAP2/TESPA1/LILRB1/CD160/KLRK1/PTPN22/PLA2G2D/CD274/ICOS/TBX21/FOXP3/SASH3/LAX1/SIRPG/DOCK8/TNFRSF13C/BTLA/TIGIT/CLEC4G/CCR2/KLRC4-KLRK1	48
BP	GO:0072676	lymphocyte migration	27/880	111/18670	1.14014e-12	9.7156e-11	8.42673e-11	CCR7/CXCR3/GPR15/ITGA4/ITGB7/PIK3CD/PIK3CG/SAA1/CCL2/CCL3/CCL4/CCL5/CCL8/CCL18/CXCL12/SPN/ZAP70/CXCL14/CXCL13/RIPK3/KLRK1/TBX21/DOCK8/GCSAM/CCL4L1/CCR2/KLRC4-KLRK1	27
BP	GO:0022409	positive regulation of cell-cell adhesion	42/880	255/18670	1.18938e-12	9.95739e-11	8.63644e-11	RUNX3/CD1D/CD3E/CD5/CD6/CD80/CCR7/EGR3/FGA/FYN/NCKAP1L/IGF1/IGF2/IL6ST/IL7R/IL10/IL12B/ITGA4/LCK/PRKCQ/PTPRC/CCL2/CCL5/SOX2/ZAP70/NR4A3/GRAP2/TESPA1/CXCL13/LILRB1/CD160/KLRK1/CD274/ICOS/FOXP3/SASH3/SIRPG/DOCK8/TNFRSF13C/BTLA/CCR2/KLRC4-KLRK1	42
BP	GO:0070098	chemokine-mediated signaling pathway	24/880	88/18670	1.41138e-12	1.16122e-10	1.00718e-10	CCR4/CCR5/CCR7/CCR8/ACKR2/FOXC1/ACKR1/XCR1/CXCR3/GPR17/CXCL2/CXCL9/PPBP/CCL2/CCL3/CCL4/CCL5/CCL8/CCL18/CXCL12/CXCL13/CXCR6/CCL4L1/CCR2	24
BP	GO:1990868	response to chemokine	25/880	97/18670	1.93899e-12	1.54215e-10	1.33757e-10	CCR4/CCR5/CCR7/CCR8/ACKR2/FOXC1/ACKR1/XCR1/CXCR3/GPR17/CXCL2/CXCL9/PPBP/CCL2/CCL3/CCL4/CCL5/CCL8/CCL18/CXCL12/CXCL13/CXCR6/DOCK8/CCL4L1/CCR2	25
BP	GO:1990869	cellular response to chemokine	25/880	97/18670	1.93899e-12	1.54215e-10	1.33757e-10	CCR4/CCR5/CCR7/CCR8/ACKR2/FOXC1/ACKR1/XCR1/CXCR3/GPR17/CXCL2/CXCL9/PPBP/CCL2/CCL3/CCL4/CCL5/CCL8/CCL18/CXCL12/CXCL13/CXCR6/DOCK8/CCL4L1/CCR2	25
BP	GO:1903039	positive regulation of leukocyte cell-cell adhesion	38/880	218/18670	2.39797e-12	1.87592e-10	1.62706e-10	RUNX3/CD1D/CD3E/CD5/CD6/CD80/CCR7/EGR3/FYN/NCKAP1L/IGF1/IGF2/IL6ST/IL7R/IL12B/ITGA4/LCK/PRKCQ/PTPRC/CCL2/CCL5/ZAP70/NR4A3/GRAP2/TESPA1/LILRB1/CD160/KLRK1/CD274/ICOS/FOXP3/SASH3/SIRPG/DOCK8/TNFRSF13C/BTLA/CCR2/KLRC4-KLRK1	38
BP	GO:0001819	positive regulation of cytokine production	59/880	464/18670	3.56598e-12	2.74465e-10	2.38055e-10	B2M/C5/CD2/CD3E/CD6/CD80/TNFRSF8/CCR7/CYP1B1/GDF2/IRF8/IGHD/IL1R1/IL1RN/IL6ST/IL10/IL12B/IL12RB2/IRF4/LY9/ORM1/ORM2/PDE4B/PRKCQ/PTPRC/SAA1/CCL3/SPN/TXK/NR4A3/IL1RL1/CD226/LILRB1/CD160/KLRK1/PTPN22/CD274/FOXP3/TLR8/CD244/SASH3/DDX60/CRTAM/CLEC7A/ZBP1/RSAD2/SLAMF6/C1QTNF3/C1QTNF4/GBP5/TNFRSF13C/CCBE1/PYHIN1/TIGIT/MCOLN2/CLEC9A/USP50/CCR2/KLRC4-KLRK1	59
BP	GO:0022407	regulation of cell-cell adhesion	54/880	403/18670	3.87643e-12	2.93624e-10	2.54672e-10	BMP4/RUNX3/CD1D/CD3E/CD5/CD6/CD80/CCR7/EGR3/FGA/FYN/NCKAP1L/IGF1/IGF2/IL1RN/IL6ST/IL7R/IL10/IL12B/ITGA4/LCK/PLG/PRKCQ/PTPRC/CCL2/CCL5/CXCL12/SOX2/SPN/TNR/ZAP70/NR4A3/GRAP2/TESPA1/CXCL13/LILRB1/CD160/KLRK1/PTPN22/PLA2G2D/CD274/ICOS/TBX21/FOXP3/SASH3/LAX1/SIRPG/DOCK8/TNFRSF13C/BTLA/TIGIT/CLEC4G/CCR2/KLRC4-KLRK1	54
BP	GO:0050870	positive regulation of T cell activation	36/880	202/18670	4.64836e-12	3.46593e-10	3.00614e-10	RUNX3/CD1D/CD3E/CD5/CD6/CD80/CCR7/EGR3/FYN/NCKAP1L/IGF1/IGF2/IL6ST/IL7R/IL12B/LCK/PRKCQ/PTPRC/CCL2/CCL5/ZAP70/GRAP2/TESPA1/LILRB1/CD160/KLRK1/CD274/ICOS/FOXP3/SASH3/SIRPG/DOCK8/TNFRSF13C/BTLA/CCR2/KLRC4-KLRK1	36
BP	GO:0032729	positive regulation of interferon-gamma production	20/880	65/18670	8.96602e-12	6.58244e-10	5.70921e-10	CD2/CD3E/IRF8/IL1R1/IL12B/IL12RB2/PDE4B/TXK/CD226/CD160/KLRK1/PTPN22/TLR8/CD244/SASH3/CLEC7A/SLAMF6/TNFRSF13C/CCR2/KLRC4-KLRK1	20
BP	GO:0046631	alpha-beta T cell activation	28/880	138/18670	4.71926e-11	3.41217e-09	2.95951e-09	PRDM1/RUNX3/CD3E/CD80/TNFSF8/DOCK2/GPR18/NCKAP1L/IL12B/IRF4/ITK/LY9/PRKCQ/PTPRC/SPN/ZAP70/EOMES/LILRB1/CD160/PLA2G2D/CD274/TBX21/FOXP3/SASH3/BCL11B/RSAD2/SLAMF6/CCR2	28
BP	GO:0035747	natural killer cell chemotaxis	9/880	11/18670	5.57382e-11	3.96989e-09	3.44325e-09	PIK3CD/PIK3CG/CCL2/CCL3/CCL4/CCL5/CXCL14/KLRK1/KLRC4-KLRK1	9
BP	GO:0060326	cell chemotaxis	43/880	304/18670	1.10448e-10	7.75082e-09	6.7226e-09	C5/CCR4/CCR5/CCR7/CCR8/ACKR2/CNR2/EGR3/FGF2/FPR2/XCR1/CXCR3/GPR18/CXCL2/NCKAP1L/IL1RN/IL10/CXCL9/PDE4B/PIK3CD/PIK3CG/PPBP/PRKCQ/RAC2/SAA1/SAA2/CCL2/CCL3/CCL4/CCL5/CCL8/CCL18/CXCL12/FGF18/CXCL14/CXCL13/CXCR6/KLRK1/STAP1/BIN2/CCL4L1/CCR2/KLRC4-KLRK1	43
BP	GO:0043368	positive T cell selection	14/880	34/18670	1.39068e-10	9.61787e-09	8.34197e-09	CD3E/CD3G/DOCK2/IL12B/IRF4/LY9/PTPRC/SPN/ZAP70/TBX21/FOXP3/BCL11B/SLAMF6/THEMIS	14
BP	GO:0045058	T cell selection	16/880	47/18670	1.97084e-10	1.34355e-08	1.16532e-08	CD1D/CD3E/CD3G/CCR7/DOCK2/IL12B/IRF4/LY9/PTPRC/SPN/ZAP70/TBX21/FOXP3/BCL11B/SLAMF6/THEMIS	16
BP	GO:0070661	leukocyte proliferation	42/880	298/18670	2.04323e-10	1.37328e-08	1.1911e-08	BMP4/CD1D/CD3E/CD6/MS4A1/CD80/TNFSF8/CD38/CD79A/DOCK2/FYN/NCKAP1L/IGF1/IGF2/IL5RA/IL6ST/IL7R/IL10/IL12B/PIK3CG/PRKCQ/PTPRC/RAC2/CCL5/CCL8/SPN/TNFAIP3/ZAP70/LILRB1/RIPK3/IKZF3/PTPN22/PLA2G2D/CD274/FOXP3/MZB1/SASH3/DOCK8/FCRL3/TNFRSF13C/CLEC4G/CCR2	42
BP	GO:0070663	regulation of leukocyte proliferation	35/880	222/18670	3.13867e-10	2.08024e-08	1.80428e-08	BMP4/CD1D/CD3E/CD6/CD80/TNFSF8/CD38/NCKAP1L/IGF1/IGF2/IL5RA/IL6ST/IL10/IL12B/PRKCQ/PTPRC/RAC2/CCL5/CCL8/SPN/TNFAIP3/ZAP70/LILRB1/RIPK3/IKZF3/PTPN22/PLA2G2D/CD274/FOXP3/MZB1/SASH3/FCRL3/TNFRSF13C/CLEC4G/CCR2	35
BP	GO:0045785	positive regulation of cell adhesion	50/880	403/18670	3.94162e-10	2.57663e-08	2.23482e-08	RUNX3/CD1D/CD3E/CD5/CD6/CD80/CCR7/ECM2/EGR3/FGA/FYN/NCKAP1L/IGF1/IGF2/IL6ST/IL7R/IL10/IL12B/ITGA4/LCK/PRKCQ/PTPRC/SAA1/CCL2/CCL5/CXCL12/SOX2/TEK/ZAP70/NR4A3/GRAP2/TESPA1/CXCL13/LILRB1/CD160/KLRK1/ABI3BP/CD274/ICOS/FOXP3/SASH3/EPB41L4B/SIRPG/CASS4/P2RY12/DOCK8/TNFRSF13C/BTLA/CCR2/KLRC4-KLRK1	50
BP	GO:0046651	lymphocyte proliferation	39/880	272/18670	5.46735e-10	3.5257e-08	3.05798e-08	BMP4/CD1D/CD3E/CD6/MS4A1/CD80/TNFSF8/CD38/CD79A/DOCK2/FYN/NCKAP1L/IGF1/IGF2/IL6ST/IL7R/IL10/IL12B/PIK3CG/PRKCQ/PTPRC/RAC2/CCL5/SPN/ZAP70/LILRB1/RIPK3/IKZF3/PTPN22/PLA2G2D/CD274/FOXP3/MZB1/SASH3/DOCK8/FCRL3/TNFRSF13C/CLEC4G/CCR2	39
BP	GO:0042098	T cell proliferation	31/880	184/18670	6.08327e-10	3.87058e-08	3.35711e-08	BMP4/CD1D/CD3E/CD6/CD80/TNFSF8/DOCK2/FYN/NCKAP1L/IGF1/IGF2/IL6ST/IL10/IL12B/PIK3CG/PRKCQ/PTPRC/RAC2/CCL5/SPN/ZAP70/LILRB1/RIPK3/PLA2G2D/CD274/FOXP3/SASH3/DOCK8/TNFRSF13C/CLEC4G/CCR2	31
BP	GO:0032943	mononuclear cell proliferation	39/880	274/18670	6.79497e-10	4.26653e-08	3.70053e-08	BMP4/CD1D/CD3E/CD6/MS4A1/CD80/TNFSF8/CD38/CD79A/DOCK2/FYN/NCKAP1L/IGF1/IGF2/IL6ST/IL7R/IL10/IL12B/PIK3CG/PRKCQ/PTPRC/RAC2/CCL5/SPN/ZAP70/LILRB1/RIPK3/IKZF3/PTPN22/PLA2G2D/CD274/FOXP3/MZB1/SASH3/DOCK8/FCRL3/TNFRSF13C/CLEC4G/CCR2	39
BP	GO:0031341	regulation of cell killing	22/880	98/18670	7.39716e-10	4.58432e-08	3.97616e-08	B2M/CD1D/CD5L/DNASE1L3/IL7R/IL12B/KRT6A/SH2D1A/PRF1/PTPRC/IL18RAP/NCR1/CD226/LILRB1/RIPK3/CD160/KLRK1/STAP1/CRTAM/CLEC7A/SLAMF6/KLRC4-KLRK1	22
BP	GO:0001906	cell killing	29/880	168/18670	1.21203e-09	7.41517e-08	6.43147e-08	B2M/C9/CD1D/CD5L/DNASE1L3/GZMB/IL7R/IL12B/KRT6A/LTF/SH2D1A/MBL2/PRF1/PTPRC/IL18RAP/NCR1/CD226/LILRB1/RIPK3/CD160/KLRK1/STAP1/CRTAM/HAMP/SLAMF7/CLEC7A/SLAMF6/DEFB132/KLRC4-KLRK1	29
BP	GO:0002706	regulation of lymphocyte mediated immunity	27/880	149/18670	1.49325e-09	9.01999e-08	7.8234e-08	B2M/C4BPA/CD1D/CR1/HPX/IL1R1/IL7R/IL10/IL12B/SH2D1A/PTPRC/IL18RAP/NCR1/CD226/LILRB1/RIPK3/CD160/KLRK1/TBX21/FOXP3/SASH3/CRTAM/RSAD2/SLAMF6/CLEC4G/CCR2/KLRC4-KLRK1	27
BP	GO:0002819	regulation of adaptive immune response	28/880	160/18670	1.69574e-09	1.01151e-07	8.77324e-08	B2M/C4BPA/CD1D/CD80/CR1/HPX/IL1R1/IL6ST/IL7R/IL10/IL12B/PRKCQ/PTPRC/TNFAIP3/IL1RL1/CD226/LILRB1/RIPK3/CD160/CD274/TBX21/FOXP3/SASH3/SAMSN1/RSAD2/TNFRSF13C/CLEC4G/CCR2	28
BP	GO:0050670	regulation of lymphocyte proliferation	32/880	208/18670	3.36331e-09	1.98144e-07	1.71859e-07	BMP4/CD1D/CD3E/CD6/CD80/TNFSF8/CD38/NCKAP1L/IGF1/IGF2/IL6ST/IL10/IL12B/PRKCQ/PTPRC/RAC2/CCL5/SPN/ZAP70/LILRB1/RIPK3/IKZF3/PTPN22/PLA2G2D/CD274/FOXP3/MZB1/SASH3/FCRL3/TNFRSF13C/CLEC4G/CCR2	32
BP	GO:0032944	regulation of mononuclear cell proliferation	32/880	209/18670	3.79625e-09	2.20923e-07	1.91616e-07	BMP4/CD1D/CD3E/CD6/CD80/TNFSF8/CD38/NCKAP1L/IGF1/IGF2/IL6ST/IL10/IL12B/PRKCQ/PTPRC/RAC2/CCL5/SPN/ZAP70/LILRB1/RIPK3/IKZF3/PTPN22/PLA2G2D/CD274/FOXP3/MZB1/SASH3/FCRL3/TNFRSF13C/CLEC4G/CCR2	32
BP	GO:0042129	regulation of T cell proliferation	27/880	156/18670	4.24326e-09	2.43962e-07	2.11598e-07	BMP4/CD1D/CD3E/CD6/CD80/TNFSF8/NCKAP1L/IGF1/IGF2/IL6ST/IL10/IL12B/PRKCQ/PTPRC/RAC2/CCL5/SPN/ZAP70/LILRB1/RIPK3/PLA2G2D/CD274/FOXP3/SASH3/TNFRSF13C/CLEC4G/CCR2	27
BP	GO:0002683	negative regulation of immune system process	52/880	463/18670	5.91501e-09	3.36029e-07	2.91451e-07	BMP4/C4BPA/C5/RUNX3/CD80/CNR2/CR1/TSC22D3/GBP1/GPR17/GPR18/IL7R/IL10/IL12B/IRF4/LDLR/LTF/PTPRC/CCL2/CCL3/CXCL12/SPN/TAL1/TNFAIP3/CST7/CD84/IL1RL1/GPR55/TSPAN32/MERTK/LILRB1/CD160/KLRK1/GRAMD4/PTPN22/STAP1/PLA2G2D/CD274/GPR171/TBX21/FOXP3/UBASH3A/LAX1/BANK1/SAMSN1/SLA2/FCRL3/TIGIT/GCSAM/CLEC4G/CCR2/KLRC4-KLRK1	52
BP	GO:2000106	regulation of leukocyte apoptotic process	19/880	83/18670	7.52529e-09	4.22479e-07	3.66433e-07	BMP4/CD3G/CCR5/CCR7/TSC22D3/IL7R/IL10/PIK3CD/PRKCQ/CCL5/CXCL12/NR4A3/MERTK/LILRB1/RIPK3/CD274/DOCK8/PTCRA/HCAR2	19
BP	GO:0032496	response to lipopolysaccharide	41/880	330/18670	1.45961e-08	8.09913e-07	7.0247e-07	ALAD/ALPL/FASLG/CD6/CD80/CCR5/CCR7/CNR2/COMT/CYP1A1/CYP1A2/GCH1/CXCL2/IRF8/IL1RN/IL10/IL12B/IL12RB2/LTF/CXCL9/PDE4B/PPBP/PTGER2/CCL2/CCL3/CCL5/SELE/THBD/TNFAIP3/CXCL13/LILRB1/IL24/KLRK1/PTPN22/STAP1/CD274/HAMP/TNIP3/CMPK2/NUGGC/KLRC4-KLRK1	41
BP	GO:0002237	response to molecule of bacterial origin	42/880	343/18670	1.49128e-08	8.17978e-07	7.09465e-07	ALAD/ALPL/FASLG/B2M/CD6/CD80/CCR5/CCR7/CNR2/COMT/CYP1A1/CYP1A2/GCH1/CXCL2/IRF8/IL1RN/IL10/IL12B/IL12RB2/LTF/CXCL9/PDE4B/PPBP/PTGER2/CCL2/CCL3/CCL5/SELE/THBD/TNFAIP3/CXCL13/LILRB1/IL24/KLRK1/PTPN22/STAP1/CD274/HAMP/TNIP3/CMPK2/NUGGC/KLRC4-KLRK1	42
BP	GO:0001910	regulation of leukocyte mediated cytotoxicity	18/880	78/18670	1.62791e-08	8.82773e-07	7.65665e-07	B2M/CD1D/DNASE1L3/IL7R/IL12B/SH2D1A/PTPRC/IL18RAP/NCR1/CD226/LILRB1/RIPK3/CD160/KLRK1/STAP1/CRTAM/SLAMF6/KLRC4-KLRK1	18
BP	GO:0002822	regulation of adaptive immune response based on somatic recombination of immune receptors built from immunoglobulin superfamily domains	25/880	145/18670	1.71559e-08	9.19865e-07	7.97836e-07	B2M/C4BPA/CD1D/CD80/CR1/HPX/IL1R1/IL7R/IL10/IL12B/PRKCQ/PTPRC/TNFAIP3/IL1RL1/CD226/LILRB1/RIPK3/CD274/TBX21/FOXP3/SASH3/RSAD2/TNFRSF13C/CLEC4G/CCR2	25
BP	GO:0030595	leukocyte chemotaxis	32/880	224/18670	2.11568e-08	1.11e-06	9.62751e-07	C5/CCR5/CCR7/CNR2/FPR2/CXCR3/GPR18/CXCL2/NCKAP1L/IL1RN/IL10/CXCL9/PDE4B/PIK3CD/PIK3CG/PPBP/RAC2/SAA1/CCL2/CCL3/CCL4/CCL5/CCL8/CCL18/CXCL12/CXCL14/CXCL13/KLRK1/STAP1/CCL4L1/CCR2/KLRC4-KLRK1	32
BP	GO:0002703	regulation of leukocyte mediated immunity	30/880	201/18670	2.11673e-08	1.11e-06	9.62751e-07	B2M/C4BPA/CD1D/CR1/DNASE1L3/HPX/IL1R1/IL7R/IL10/IL12B/SH2D1A/PTPRC/RAC2/IL18RAP/CD84/NCR1/CD226/LILRB1/RIPK3/CD160/KLRK1/TBX21/FOXP3/SASH3/CRTAM/RSAD2/SLAMF6/CLEC4G/CCR2/KLRC4-KLRK1	30
BP	GO:0001909	leukocyte mediated cytotoxicity	21/880	107/18670	2.29757e-08	1.19174e-06	1.03365e-06	B2M/CD1D/DNASE1L3/GZMB/IL7R/IL12B/SH2D1A/PRF1/PTPRC/IL18RAP/NCR1/CD226/LILRB1/RIPK3/CD160/KLRK1/STAP1/CRTAM/SLAMF7/SLAMF6/KLRC4-KLRK1	21
BP	GO:0048247	lymphocyte chemotaxis	16/880	64/18670	3.01345e-08	1.54626e-06	1.34113e-06	CXCR3/PIK3CD/PIK3CG/SAA1/CCL2/CCL3/CCL4/CCL5/CCL8/CCL18/CXCL14/CXCL13/KLRK1/CCL4L1/CCR2/KLRC4-KLRK1	16
BP	GO:0050854	regulation of antigen receptor-mediated signaling pathway	16/880	65/18670	3.82424e-08	1.92098e-06	1.66614e-06	BLK/CCR7/GBP1/LCK/PAX5/PRKCB/PTPRC/TESPA1/CD226/CD160/PTPN22/STAP1/TRAT1/UBASH3A/FCRL3/GCSAM	16
BP	GO:0072678	T cell migration	16/880	65/18670	3.82424e-08	1.92098e-06	1.66614e-06	CXCR3/GPR15/ITGA4/ITGB7/PIK3CD/PIK3CG/CCL2/CCL3/CCL5/CXCL12/SPN/ZAP70/CXCL13/RIPK3/DOCK8/CCR2	16
BP	GO:0046632	alpha-beta T cell differentiation	20/880	101/18670	4.22772e-08	2.10153e-06	1.82274e-06	PRDM1/RUNX3/CD80/TNFSF8/GPR18/NCKAP1L/IL12B/IRF4/ITK/LY9/SPN/ZAP70/EOMES/PLA2G2D/TBX21/FOXP3/SASH3/BCL11B/RSAD2/SLAMF6	20
BP	GO:0071887	leukocyte apoptotic process	20/880	104/18670	7.06727e-08	3.47681e-06	3.01557e-06	FASLG/BMP4/CD3G/CCR5/CCR7/TSC22D3/IL7R/IL10/PIK3CD/PRKCQ/CCL5/CXCL12/NR4A3/MERTK/LILRB1/RIPK3/CD274/DOCK8/PTCRA/HCAR2	20
BP	GO:0031343	positive regulation of cell killing	16/880	68/18670	7.59344e-08	3.69754e-06	3.20703e-06	B2M/CD1D/CD5L/IL12B/SH2D1A/PRF1/PTPRC/IL18RAP/CD226/CD160/KLRK1/STAP1/CRTAM/CLEC7A/SLAMF6/KLRC4-KLRK1	16
BP	GO:1990266	neutrophil migration	21/880	118/18670	1.35173e-07	6.51562e-06	5.65126e-06	CCR7/CXCL2/NCKAP1L/IL1R1/IL1RN/CXCL9/PDE4B/PIK3CD/PIK3CG/PPBP/RAC2/SAA1/CCL2/CCL3/CCL4/CCL5/CCL8/CCL18/CXCL13/MCOLN2/CCL4L1	21
BP	GO:2000401	regulation of lymphocyte migration	15/880	63/18670	1.63659e-07	7.80981e-06	6.77376e-06	ITGA4/CCL2/CCL3/CCL4/CCL5/CXCL12/SPN/CXCL14/CXCL13/RIPK3/KLRK1/DOCK8/GCSAM/CCR2/KLRC4-KLRK1	15
BP	GO:0002695	negative regulation of leukocyte activation	26/880	175/18670	2.00928e-07	9.49334e-06	8.23395e-06	BMP4/RUNX3/CD80/CNR2/IL10/LDLR/PTPRC/SPN/TNFAIP3/CST7/CD84/TSPAN32/MERTK/LILRB1/PTPN22/PLA2G2D/CD274/TBX21/FOXP3/LAX1/BANK1/SAMSN1/SLA2/TIGIT/CLEC4G/CCR2	26
BP	GO:0031295	T cell costimulation	14/880	56/18670	2.20006e-07	1.02928e-05	8.92737e-06	CD3E/CD5/CD80/CCR7/FYN/LCK/GRAP2/CD160/KLRK1/CD274/ICOS/TNFRSF13C/BTLA/KLRC4-KLRK1	14
BP	GO:0031294	lymphocyte costimulation	14/880	57/18670	2.79093e-07	1.29304e-05	1.12151e-05	CD3E/CD5/CD80/CCR7/FYN/LCK/GRAP2/CD160/KLRK1/CD274/ICOS/TNFRSF13C/BTLA/KLRC4-KLRK1	14
BP	GO:0072503	cellular divalent inorganic cation homeostasis	50/880	493/18670	2.94197e-07	1.34991e-05	1.17083e-05	ADRA1B/FASLG/ATP2A3/MS4A1/CD38/CCR4/CCR5/CCR7/CCR8/ACKR2/DRD1/ESR1/FGF2/FPR2/FYN/XCR1/CXCR3/GPR17/GPR18/LCK/CXCL9/MT1E/MT1F/MT1G/MT1H/MT1M/MT1X/MT2A/P2RX1/PIK3CG/PKHD1/PRKCB/PTGDR/PTGER2/PTPRC/SAA1/CCL3/CCL5/CCL8/CXCL12/SLC30A2/GPR65/GPR55/CXCL13/CXCR6/GPR174/SLC24A4/JSRP1/MCOLN2/CCR2	50
BP	GO:0030593	neutrophil chemotaxis	19/880	104/18670	3.47084e-07	1.57742e-05	1.36816e-05	CCR7/CXCL2/NCKAP1L/IL1RN/CXCL9/PDE4B/PIK3CD/PIK3CG/PPBP/RAC2/SAA1/CCL2/CCL3/CCL4/CCL5/CCL8/CCL18/CXCL13/CCL4L1	19
BP	GO:0042102	positive regulation of T cell proliferation	18/880	95/18670	3.99658e-07	1.79922e-05	1.56053e-05	CD1D/CD3E/CD6/CD80/NCKAP1L/IGF1/IGF2/IL6ST/IL12B/PRKCQ/PTPRC/CCL5/ZAP70/CD274/FOXP3/SASH3/TNFRSF13C/CCR2	18
BP	GO:0071222	cellular response to lipopolysaccharide	28/880	205/18670	4.1218e-07	1.83825e-05	1.59438e-05	CD6/CD80/CCR5/CXCL2/IRF8/IL1RN/IL10/IL12B/LTF/CXCL9/PDE4B/PPBP/CCL2/CCL3/CCL5/TNFAIP3/CXCL13/LILRB1/IL24/KLRK1/PTPN22/STAP1/CD274/HAMP/TNIP3/CMPK2/NUGGC/KLRC4-KLRK1	28
BP	GO:0002685	regulation of leukocyte migration	27/880	196/18670	5.56799e-07	2.46023e-05	2.13385e-05	C5/CCR7/FPR2/CXCR3/GPR18/NCKAP1L/IL1R1/ITGA4/RAC2/CCL2/CCL3/CCL4/CCL5/CCL8/CXCL12/SPN/CXCL14/CXCL13/RIPK3/KLRK1/STAP1/SMPD3/P2RY12/DOCK8/GCSAM/CCR2/KLRC4-KLRK1	27
BP	GO:0033077	T cell differentiation in thymus	15/880	70/18670	7.10069e-07	3.10867e-05	2.69627e-05	B2M/BMP4/CAMK4/CD3E/CD3G/CCR7/DOCK2/EGR3/IL7R/PTPRC/ZAP70/TESPA1/RIPK3/FOXP3/BCL11B	15
BP	GO:0050866	negative regulation of cell activation	27/880	199/18670	7.5545e-07	3.27728e-05	2.84251e-05	BMP4/RUNX3/CD80/CNR2/IL10/LDLR/PTPRC/SPN/THBD/TNFAIP3/CST7/CD84/TSPAN32/MERTK/LILRB1/PTPN22/PLA2G2D/CD274/TBX21/FOXP3/LAX1/BANK1/SAMSN1/SLA2/TIGIT/CLEC4G/CCR2	27
BP	GO:0071219	cellular response to molecule of bacterial origin	28/880	212/18670	8.23752e-07	3.54139e-05	3.07159e-05	CD6/CD80/CCR5/CXCL2/IRF8/IL1RN/IL10/IL12B/LTF/CXCL9/PDE4B/PPBP/CCL2/CCL3/CCL5/TNFAIP3/CXCL13/LILRB1/IL24/KLRK1/PTPN22/STAP1/CD274/HAMP/TNIP3/CMPK2/NUGGC/KLRC4-KLRK1	28
BP	GO:0032623	interleukin-2 production	14/880	62/18670	8.46737e-07	3.60771e-05	3.12911e-05	CD3E/CD247/CD80/GBP1/IRF4/PDE4B/PRKCQ/PTPRC/TNFAIP3/TBX21/FOXP3/SASH3/CLEC7A/CCR2	14
BP	GO:0032663	regulation of interleukin-2 production	13/880	54/18670	9.5261e-07	4.02288e-05	3.4892e-05	CD3E/CD80/GBP1/IRF4/PDE4B/PRKCQ/PTPRC/TNFAIP3/TBX21/FOXP3/SASH3/CLEC7A/CCR2	13
BP	GO:0050663	cytokine secretion	30/880	240/18670	1.10093e-06	4.60846e-05	3.9971e-05	C5/CD2/CHI3L1/CCR7/GBP1/IGHD/IL10/ORM1/ORM2/SAA1/CCL3/TNFAIP3/IL1RL1/ISG15/HDAC9/LILRB1/CD160/PTPN22/CD274/FOXP3/TLR8/CD244/BANK1/CRTAM/C1QTNF3/C1QTNF4/GBP5/MCOLN2/CLEC9A/USP50	30
BP	GO:2000107	negative regulation of leukocyte apoptotic process	12/880	47/18670	1.26628e-06	5.24794e-05	4.55175e-05	BMP4/CCR5/CCR7/TSC22D3/IL7R/PRKCQ/CCL5/CXCL12/MERTK/LILRB1/DOCK8/PTCRA	12
BP	GO:0002228	natural killer cell mediated immunity	14/880	64/18670	1.27637e-06	5.24794e-05	4.55175e-05	GZMB/IL12B/KLRD1/SH2D1A/IL18RAP/NCR1/CD226/LILRB1/CD160/KLRK1/CRTAM/SLAMF7/SLAMF6/KLRC4-KLRK1	14
BP	GO:0042573	retinoic acid metabolic process	10/880	32/18670	1.28669e-06	5.24794e-05	4.55175e-05	ADH1A/ADH1B/ADH1C/ADH6/CYP1A1/CYP2C8/CYP3A4/CYP26A1/ALDH8A1/BCO2	10
BP	GO:0046634	regulation of alpha-beta T cell activation	17/880	93/18670	1.4144e-06	5.71994e-05	4.96114e-05	PRDM1/RUNX3/CD3E/CD80/NCKAP1L/IL12B/IRF4/PRKCQ/PTPRC/ZAP70/LILRB1/CD160/CD274/TBX21/FOXP3/SASH3/CCR2	17
BP	GO:0001912	positive regulation of leukocyte mediated cytotoxicity	13/880	56/18670	1.48859e-06	5.96937e-05	5.17747e-05	B2M/CD1D/IL12B/SH2D1A/PTPRC/IL18RAP/CD226/CD160/KLRK1/STAP1/CRTAM/SLAMF6/KLRC4-KLRK1	13
BP	GO:0002708	positive regulation of lymphocyte mediated immunity	18/880	105/18670	1.84884e-06	7.35223e-05	6.37688e-05	B2M/CD1D/HPX/IL1R1/IL12B/SH2D1A/PTPRC/IL18RAP/CD226/CD160/KLRK1/TBX21/FOXP3/SASH3/CRTAM/RSAD2/SLAMF6/KLRC4-KLRK1	18
BP	GO:0034308	primary alcohol metabolic process	16/880	85/18670	1.91752e-06	7.56233e-05	6.55911e-05	ADH1A/ADH1B/ADH1C/ADH4/ADH6/CYP1A1/CYP1A2/CYP1B1/CYP2D6/CYP3A4/IGF1/SULT2A1/RDH16/NAAA/SULT1B1/HAO1	16
BP	GO:0042572	retinol metabolic process	11/880	41/18670	2.06199e-06	8.0654e-05	6.99545e-05	ADH1A/ADH1B/ADH1C/ADH4/ADH6/CYP1A1/CYP1A2/CYP1B1/CYP2D6/CYP3A4/RDH16	11
BP	GO:0097529	myeloid leukocyte migration	27/880	210/18670	2.18091e-06	8.46122e-05	7.33876e-05	C5/CCR7/FPR2/CXCL2/NCKAP1L/IL1R1/IL1RN/CXCL9/PDE4B/PIK3CD/PIK3CG/PPBP/RAC2/SAA1/CCL2/CCL3/CCL4/CCL5/CCL8/CCL18/CXCL12/CXCL13/STAP1/P2RY12/MCOLN2/CCL4L1/CCR2	27
BP	GO:0070665	positive regulation of leukocyte proliferation	21/880	139/18670	2.23182e-06	8.58889e-05	7.44949e-05	CD1D/CD3E/CD6/CD80/CD38/NCKAP1L/IGF1/IGF2/IL5RA/IL6ST/IL12B/PRKCQ/PTPRC/CCL5/ZAP70/CD274/FOXP3/SASH3/FCRL3/TNFRSF13C/CCR2	21
BP	GO:0001776	leukocyte homeostasis	16/880	86/18670	2.25409e-06	8.60522e-05	7.46365e-05	TNFRSF17/TSC22D3/NCKAP1L/PDE4B/PIK3CD/TNFAIP3/MERTK/RIPK3/SIT1/FOXP3/DOCK10/GPR174/TNFRSF13C/DOCK11/HCAR2/CCR2	16
BP	GO:0010273	detoxification of copper ion	7/880	15/18670	2.3289e-06	8.7485e-05	7.58792e-05	MT1E/MT1F/MT1G/MT1H/MT1M/MT1X/MT2A	7
BP	GO:1990169	stress response to copper ion	7/880	15/18670	2.3289e-06	8.7485e-05	7.58792e-05	MT1E/MT1F/MT1G/MT1H/MT1M/MT1X/MT2A	7
BP	GO:0071216	cellular response to biotic stimulus	29/880	236/18670	2.34662e-06	8.7485e-05	7.58792e-05	CD6/CD80/CCR5/CXCL2/IRF8/IL1RN/IL10/IL12B/LTF/CXCL9/PDE4B/PPBP/CCL2/CCL3/CCL5/TNFAIP3/CXCL13/LILRB1/IL24/KLRK1/PTPN22/STAP1/CD274/HAMP/CLEC7A/TNIP3/CMPK2/NUGGC/KLRC4-KLRK1	29
BP	GO:1901623	regulation of lymphocyte chemotaxis	9/880	27/18670	2.39692e-06	8.86673e-05	7.69048e-05	CCL2/CCL3/CCL4/CCL5/CXCL14/CXCL13/KLRK1/CCR2/KLRC4-KLRK1	9
BP	GO:0097530	granulocyte migration	21/880	141/18670	2.82201e-06	0.00010359	8.98474e-05	CCR7/CXCL2/NCKAP1L/IL1R1/IL1RN/CXCL9/PDE4B/PIK3CD/PIK3CG/PPBP/RAC2/SAA1/CCL2/CCL3/CCL4/CCL5/CCL8/CCL18/CXCL13/MCOLN2/CCL4L1	21
BP	GO:0050671	positive regulation of lymphocyte proliferation	20/880	130/18670	2.90662e-06	0.000105881	9.18347e-05	CD1D/CD3E/CD6/CD80/CD38/NCKAP1L/IGF1/IGF2/IL6ST/IL12B/PRKCQ/PTPRC/CCL5/ZAP70/CD274/FOXP3/SASH3/FCRL3/TNFRSF13C/CCR2	20
BP	GO:0050852	T cell receptor signaling pathway	26/880	202/18670	3.2799e-06	0.000117723	0.000102106	CD3E/CD3G/CD247/CCR7/FYN/GBP1/HLA-DRB5/ITK/LCK/PDE4B/PIK3CD/PRKCQ/PTPRC/TXK/ZAP70/GRAP2/TESPA1/CD226/CD160/PTPN22/TRAV29DV5/TRAV19/TRAT1/FOXP3/UBASH3A/THEMIS	26
BP	GO:0032946	positive regulation of mononuclear cell proliferation	20/880	131/18670	3.28104e-06	0.000117723	0.000102106	CD1D/CD3E/CD6/CD80/CD38/NCKAP1L/IGF1/IGF2/IL6ST/IL12B/PRKCQ/PTPRC/CCL5/ZAP70/CD274/FOXP3/SASH3/FCRL3/TNFRSF13C/CCR2	20
BP	GO:0042267	natural killer cell mediated cytotoxicity	13/880	60/18670	3.41721e-06	0.000121693	0.00010555	GZMB/IL12B/SH2D1A/IL18RAP/NCR1/CD226/LILRB1/CD160/KLRK1/CRTAM/SLAMF7/SLAMF6/KLRC4-KLRK1	13
BP	GO:0002699	positive regulation of immune effector process	27/880	216/18670	3.75042e-06	0.00013257	0.000114984	B2M/CD1D/CD80/HPX/IL1R1/IL12B/SH2D1A/PTPRC/RAC2/NR4A3/IL18RAP/CD84/CD226/LILRB1/CD160/KLRK1/TBX21/FOXP3/MZB1/CD244/SASH3/DDX60/CRTAM/RSAD2/SLAMF6/CCR2/KLRC4-KLRK1	27
BP	GO:0002709	regulation of T cell mediated immunity	14/880	70/18670	3.96175e-06	0.000139011	0.00012057	B2M/CD1D/IL1R1/IL7R/IL12B/PTPRC/LILRB1/RIPK3/TBX21/FOXP3/SASH3/RSAD2/CLEC4G/CCR2	14
BP	GO:0071346	cellular response to interferon-gamma	24/880	180/18670	4.18489e-06	0.000145769	0.000126431	B2M/GBP1/HLA-DRB5/HPX/IRF8/IL12B/IRF4/MT2A/OAS1/OAS2/OAS3/CCL2/CCL3/CCL4/CCL5/CCL8/CCL18/TXK/SOCS3/TRIM22/IRF9/GBP5/GBP6/CCL4L1	24
BP	GO:0042269	regulation of natural killer cell mediated cytotoxicity	11/880	44/18670	4.39656e-06	0.000152032	0.000131863	IL12B/SH2D1A/IL18RAP/NCR1/CD226/LILRB1/CD160/KLRK1/CRTAM/SLAMF6/KLRC4-KLRK1	11
BP	GO:0019722	calcium-mediated signaling	27/880	218/18670	4.46944e-06	0.00015344	0.000133085	CD3E/CCR4/CCR5/CCR7/CCR8/ACKR2/RCAN1/FPR2/GBP1/XCR1/CXCR3/IGF1/PLEK/PTPRC/CCL3/CCL4/SELE/ZAP70/CXCR6/TRAT1/TMEM100/P2RY12/SLA2/JSRP1/BHLHA15/CCR2/PLA2G4B	27
BP	GO:0071280	cellular response to copper ion	9/880	29/18670	4.70378e-06	0.000160332	0.000139062	CYP1A1/CYP1A2/MT1E/MT1F/MT1G/MT1H/MT1M/MT1X/MT2A	9
BP	GO:0071621	granulocyte chemotaxis	19/880	123/18670	4.81143e-06	0.000162838	0.000141236	CCR7/CXCL2/NCKAP1L/IL1RN/CXCL9/PDE4B/PIK3CD/PIK3CG/PPBP/RAC2/SAA1/CCL2/CCL3/CCL4/CCL5/CCL8/CCL18/CXCL13/CCL4L1	19
BP	GO:0009615	response to virus	35/880	326/18670	5.09601e-06	0.000171255	0.000148536	CYP1A1/IFI6/GBP1/IFI27/IFIT1/IL12B/CXCL9/MX1/OAS1/OAS2/OAS3/PRF1/PTPRC/CCL4/CCL5/CCL8/CXCL12/TNFAIP3/FCN3/ISG15/TSPAN32/TRIM22/IRF9/IFI44/LILRB1/IFI44L/PIM2/TBX21/DUOX2/FOXP3/HERC5/TLR8/DDX60/RSAD2/APOBEC3A	35
BP	GO:0002820	negative regulation of adaptive immune response	11/880	45/18670	5.57298e-06	0.000185696	0.000161061	C4BPA/CR1/IL7R/PTPRC/IL1RL1/LILRB1/CD160/TBX21/FOXP3/SAMSN1/CLEC4G	11
BP	GO:2000403	positive regulation of lymphocyte migration	10/880	37/18670	5.60508e-06	0.000185696	0.000161061	ITGA4/CCL3/CCL4/CCL5/CXCL12/SPN/CXCL14/CXCL13/DOCK8/CCR2	10
BP	GO:0035710	CD4-positive, alpha-beta T cell activation	16/880	92/18670	5.64247e-06	0.000185696	0.000161061	RUNX3/CD80/NCKAP1L/IL12B/IRF4/LY9/PRKCQ/SPN/CD160/PLA2G2D/CD274/TBX21/FOXP3/SASH3/RSAD2/SLAMF6	16
BP	GO:0006805	xenobiotic metabolic process	19/880	125/18670	6.13128e-06	0.000200401	0.000173815	NAT2/BAAT/CDO1/CYP1A1/CYP1A2/CYP1B1/CYP2C8/CYP2D6/CYP2E1/CYP3A4/CYP26A1/ACSL1/FMO2/FMO3/GHR/UGT2B15/SULT1B1/CSAD/CYP2U1	19
BP	GO:0032743	positive regulation of interleukin-2 production	9/880	30/18670	6.4398e-06	0.000204695	0.00017754	CD3E/CD80/IRF4/PDE4B/PRKCQ/PTPRC/SASH3/CLEC7A/CCR2	9
BP	GO:0045954	positive regulation of natural killer cell mediated cytotoxicity	9/880	30/18670	6.4398e-06	0.000204695	0.00017754	IL12B/SH2D1A/IL18RAP/CD226/CD160/KLRK1/CRTAM/SLAMF6/KLRC4-KLRK1	9
BP	GO:0043373	CD4-positive, alpha-beta T cell lineage commitment	7/880	17/18670	6.47713e-06	0.000204695	0.00017754	IL12B/IRF4/LY9/SPN/TBX21/FOXP3/SLAMF6	7
BP	GO:0061687	detoxification of inorganic compound	7/880	17/18670	6.47713e-06	0.000204695	0.00017754	MT1E/MT1F/MT1G/MT1H/MT1M/MT1X/MT2A	7
BP	GO:0097501	stress response to metal ion	7/880	17/18670	6.47713e-06	0.000204695	0.00017754	MT1E/MT1F/MT1G/MT1H/MT1M/MT1X/MT2A	7
BP	GO:0050707	regulation of cytokine secretion	26/880	210/18670	6.72656e-06	0.000211179	0.000183164	C5/CD2/CCR7/GBP1/IGHD/IL10/ORM1/ORM2/SAA1/CCL3/TNFAIP3/IL1RL1/HDAC9/LILRB1/CD160/PTPN22/CD274/FOXP3/TLR8/CD244/BANK1/CRTAM/C1QTNF3/C1QTNF4/CLEC9A/USP50	26
BP	GO:0002715	regulation of natural killer cell mediated immunity	11/880	46/18670	7.01494e-06	0.000218793	0.000189768	IL12B/SH2D1A/IL18RAP/NCR1/CD226/LILRB1/CD160/KLRK1/CRTAM/SLAMF6/KLRC4-KLRK1	11
BP	GO:0055069	zinc ion homeostasis	10/880	38/18670	7.28754e-06	0.000225819	0.000195862	LCK/MT1E/MT1F/MT1G/MT1H/MT1M/MT1X/MT2A/SLC30A2/TMC8	10
BP	GO:0034341	response to interferon-gamma	25/880	199/18670	7.77411e-06	0.000238609	0.000206956	B2M/GBP1/GCH1/HLA-DRB5/HPX/IRF8/IL12B/IRF4/MT2A/OAS1/OAS2/OAS3/CCL2/CCL3/CCL4/CCL5/CCL8/CCL18/TXK/SOCS3/TRIM22/IRF9/GBP5/GBP6/CCL4L1	25
BP	GO:0043383	negative T cell selection	6/880	12/18670	7.80031e-06	0.000238609	0.000206956	CD3E/CCR7/DOCK2/PTPRC/ZAP70/THEMIS	6
BP	GO:0002821	positive regulation of adaptive immune response	17/880	105/18670	7.90573e-06	0.000240294	0.000208416	B2M/CD1D/CD80/HPX/IL1R1/IL6ST/IL12B/PRKCQ/PTPRC/CD226/CD274/TBX21/FOXP3/SASH3/RSAD2/TNFRSF13C/CCR2	17
BP	GO:0007204	positive regulation of cytosolic calcium ion concentration	34/880	319/18670	8.10871e-06	0.000244903	0.000212415	ADRA1B/FASLG/MS4A1/CD38/CCR4/CCR5/CCR7/CCR8/ACKR2/DRD1/ESR1/FGF2/FPR2/FYN/XCR1/CXCR3/GPR17/GPR18/LCK/CXCL9/PIK3CG/PTGDR/PTGER2/PTPRC/SAA1/CCL3/GPR65/GPR55/CXCL13/CXCR6/GPR174/JSRP1/MCOLN2/CCR2	34
BP	GO:1903555	regulation of tumor necrosis factor superfamily cytokine production	22/880	163/18670	8.5387e-06	0.000256268	0.000222272	CD2/TNFRSF8/GPR18/IGF1/IL10/IL12B/LTF/ORM1/ORM2/PTPRC/CCL3/SLAMF1/SPN/TNFAIP3/LILRB1/PTPN22/CD274/FOXP3/SASH3/CLEC7A/C1QTNF4/CCR2	22
BP	GO:0050857	positive regulation of antigen receptor-mediated signaling pathway	8/880	24/18670	8.83992e-06	0.000263651	0.000228675	CCR7/LCK/PRKCB/PTPRC/TESPA1/CD226/STAP1/TRAT1	8
BP	GO:0002456	T cell mediated immunity	17/880	106/18670	9.00888e-06	0.000267021	0.000231598	B2M/CD1D/CD8A/IL1R1/IL7R/IL12B/PRF1/PTPRC/IL18RAP/LILRB1/RIPK3/TBX21/FOXP3/SASH3/RSAD2/CLEC4G/CCR2	17
BP	GO:0034754	cellular hormone metabolic process	19/880	129/18670	9.79065e-06	0.000288401	0.000250142	ADH1A/ADH1B/ADH1C/ADH4/ADH6/COMT/CYP1A1/CYP1A2/CYP1B1/CYP2C8/CYP2D6/CYP3A4/CYP26A1/ESR1/UGT2B7/RDH16/HSD17B6/ALDH8A1/BCO2	19
BP	GO:0070233	negative regulation of T cell apoptotic process	7/880	18/18670	1.0168e-05	0.000297678	0.000258188	BMP4/TSC22D3/IL7R/PRKCQ/CCL5/DOCK8/PTCRA	7
BP	GO:0045086	positive regulation of interleukin-2 biosynthetic process	6/880	13/18670	1.39078e-05	0.000402321	0.000348949	CD3E/CD80/IRF4/PRKCQ/PTPRC/CLEC7A	6
BP	GO:0071706	tumor necrosis factor superfamily cytokine production	22/880	168/18670	1.39109e-05	0.000402321	0.000348949	CD2/TNFRSF8/GPR18/IGF1/IL10/IL12B/LTF/ORM1/ORM2/PTPRC/CCL3/SLAMF1/SPN/TNFAIP3/LILRB1/PTPN22/CD274/FOXP3/SASH3/CLEC7A/C1QTNF4/CCR2	22
BP	GO:1902105	regulation of leukocyte differentiation	30/880	272/18670	1.4072e-05	0.000404527	0.000350863	PRDM1/BMP4/CAMK4/RUNX3/CD2/CD80/CR1/EGR3/EVI2B/NCKAP1L/IL7R/IL12B/IRF4/LTF/PTPRC/CCL3/TAL1/KLF10/ZAP70/GPR55/TOX/TESPA1/LILRB1/IKZF3/TBX21/FOXP3/SASH3/FCRL3/SLC9B2/CCR2	30
BP	GO:0002717	positive regulation of natural killer cell mediated immunity	9/880	33/18670	1.52813e-05	0.000431018	0.000373839	IL12B/SH2D1A/IL18RAP/CD226/CD160/KLRK1/CRTAM/SLAMF6/KLRC4-KLRK1	9
BP	GO:0070232	regulation of T cell apoptotic process	9/880	33/18670	1.52813e-05	0.000431018	0.000373839	BMP4/TSC22D3/IL7R/PRKCQ/CCL5/RIPK3/CD274/DOCK8/PTCRA	9
BP	GO:0045619	regulation of lymphocyte differentiation	22/880	169/18670	1.52959e-05	0.000431018	0.000373839	PRDM1/BMP4/CAMK4/RUNX3/CD2/CD80/CR1/EGR3/NCKAP1L/IL7R/IL12B/IRF4/PTPRC/ZAP70/TOX/TESPA1/IKZF3/TBX21/FOXP3/SASH3/FCRL3/CCR2	22
BP	GO:0002363	alpha-beta T cell lineage commitment	7/880	19/18670	1.54451e-05	0.000431018	0.000373839	IL12B/IRF4/LY9/SPN/TBX21/FOXP3/SLAMF6	7
BP	GO:0045076	regulation of interleukin-2 biosynthetic process	7/880	19/18670	1.54451e-05	0.000431018	0.000373839	CD3E/CD80/IRF4/PRKCQ/PTPRC/FOXP3/CLEC7A	7
BP	GO:0002824	positive regulation of adaptive immune response based on somatic recombination of immune receptors built from immunoglobulin superfamily domains	16/880	100/18670	1.69312e-05	0.000469742	0.000407426	B2M/CD1D/CD80/HPX/IL1R1/IL12B/PRKCQ/PTPRC/CD226/CD274/TBX21/FOXP3/SASH3/RSAD2/TNFRSF13C/CCR2	16
BP	GO:0032680	regulation of tumor necrosis factor production	21/880	160/18670	2.09271e-05	0.000577249	0.000500671	CD2/TNFRSF8/GPR18/IGF1/IL10/IL12B/LTF/ORM1/ORM2/PTPRC/CCL3/SLAMF1/SPN/TNFAIP3/LILRB1/PTPN22/FOXP3/SASH3/CLEC7A/C1QTNF4/CCR2	21
BP	GO:0043369	CD4-positive or CD8-positive, alpha-beta T cell lineage commitment	7/880	20/18670	2.27968e-05	0.000625209	0.000542269	IL12B/IRF4/LY9/SPN/TBX21/FOXP3/SLAMF6	7
BP	GO:0045123	cellular extravasation	12/880	61/18670	2.29867e-05	0.000626813	0.00054366	ADD2/IL1R1/ITGA4/ITGB7/PIK3CD/PIK3CG/CCL2/CXCL12/SELE/SPN/RIPK3/CCR2	12
BP	GO:0002688	regulation of leukocyte chemotaxis	17/880	114/18670	2.40989e-05	0.000653409	0.000566728	C5/CCR7/FPR2/GPR18/NCKAP1L/RAC2/CCL2/CCL3/CCL4/CCL5/CXCL12/CXCL14/CXCL13/KLRK1/STAP1/CCR2/KLRC4-KLRK1	17
BP	GO:0046635	positive regulation of alpha-beta T cell activation	12/880	62/18670	2.72949e-05	0.000735884	0.000638262	RUNX3/CD3E/CD80/NCKAP1L/IL12B/PRKCQ/PTPRC/ZAP70/CD160/FOXP3/SASH3/CCR2	12
BP	GO:0032640	tumor necrosis factor production	21/880	163/18670	2.7776e-05	0.000744646	0.000645861	CD2/TNFRSF8/GPR18/IGF1/IL10/IL12B/LTF/ORM1/ORM2/PTPRC/CCL3/SLAMF1/SPN/TNFAIP3/LILRB1/PTPN22/FOXP3/SASH3/CLEC7A/C1QTNF4/CCR2	21
BP	GO:0016999	antibiotic metabolic process	20/880	151/18670	2.85889e-05	0.000760441	0.000659561	ADH1A/ADH1B/ADH1C/ADH4/ADH6/CYP1A1/CYP1A2/CYP4B1/FYN/HBA1/HBA2/HBB/HP/MMP3/RAC2/SULT2A1/FTCD/SULT1B1/DUOX2/DUOXA2	20
BP	GO:0045580	regulation of T cell differentiation	19/880	139/18670	2.88432e-05	0.000760441	0.000659561	PRDM1/BMP4/CAMK4/RUNX3/CD2/CD80/CR1/EGR3/NCKAP1L/IL7R/IL12B/IRF4/PTPRC/ZAP70/TESPA1/TBX21/FOXP3/SASH3/CCR2	19
BP	GO:0050715	positive regulation of cytokine secretion	19/880	139/18670	2.88432e-05	0.000760441	0.000659561	C5/CD2/IGHD/IL10/ORM1/ORM2/SAA1/CCL3/IL1RL1/CD160/PTPN22/CD274/TLR8/CD244/CRTAM/C1QTNF3/C1QTNF4/CLEC9A/USP50	19
BP	GO:0010043	response to zinc ion	11/880	53/18670	2.96377e-05	0.000772848	0.000670322	ALAD/KRT14/MT1E/MT1F/MT1G/MT1H/MT1M/MT1X/MT2A/SLC30A2/HAMP	11
BP	GO:0070228	regulation of lymphocyte apoptotic process	11/880	53/18670	2.96377e-05	0.000772848	0.000670322	BMP4/CD3G/TSC22D3/IL7R/IL10/PRKCQ/CCL5/RIPK3/CD274/DOCK8/PTCRA	11
BP	GO:0006874	cellular calcium ion homeostasis	42/880	458/18670	3.0749e-05	0.000797468	0.000691676	ADRA1B/FASLG/ATP2A3/MS4A1/CD38/CCR4/CCR5/CCR7/CCR8/ACKR2/DRD1/ESR1/FGF2/FPR2/FYN/XCR1/CXCR3/GPR17/GPR18/LCK/CXCL9/P2RX1/PIK3CG/PKHD1/PRKCB/PTGDR/PTGER2/PTPRC/SAA1/CCL3/CCL5/CCL8/CXCL12/GPR65/GPR55/CXCL13/CXCR6/GPR174/SLC24A4/JSRP1/MCOLN2/CCR2	42
BP	GO:0001958	endochondral ossification	8/880	28/18670	3.15776e-05	0.000810152	0.000702677	ALPL/BMP4/RUNX2/FOXC1/TEK/FGF18/SMPD3/PHOSPHO1	8
BP	GO:0036075	replacement ossification	8/880	28/18670	3.15776e-05	0.000810152	0.000702677	ALPL/BMP4/RUNX2/FOXC1/TEK/FGF18/SMPD3/PHOSPHO1	8
BP	GO:0006067	ethanol metabolic process	7/880	21/18670	3.28076e-05	0.00083364	0.00072305	ADH1A/ADH1B/ADH1C/ADH4/ADH6/SULT2A1/SULT1B1	7
BP	GO:0006882	cellular zinc ion homeostasis	9/880	36/18670	3.28425e-05	0.00083364	0.00072305	LCK/MT1E/MT1F/MT1G/MT1H/MT1M/MT1X/MT2A/SLC30A2	9
BP	GO:0051480	regulation of cytosolic calcium ion concentration	35/880	357/18670	3.59553e-05	0.000907823	0.000787391	ADRA1B/FASLG/MS4A1/CD38/CCR4/CCR5/CCR7/CCR8/ACKR2/DRD1/ESR1/FGF2/FPR2/FYN/XCR1/CXCR3/GPR17/GPR18/LCK/CXCL9/P2RX1/PIK3CG/PTGDR/PTGER2/PTPRC/SAA1/CCL3/GPR65/GPR55/CXCL13/CXCR6/GPR174/JSRP1/MCOLN2/CCR2	35
BP	GO:0043367	CD4-positive, alpha-beta T cell differentiation	13/880	74/18670	3.76035e-05	0.000944441	0.000819152	RUNX3/CD80/NCKAP1L/IL12B/IRF4/LY9/SPN/PLA2G2D/TBX21/FOXP3/SASH3/RSAD2/SLAMF6	13
BP	GO:0042445	hormone metabolic process	26/880	232/18670	3.92903e-05	0.00098164	0.000851416	ADH1A/ADH1B/ADH1C/ADH4/ADH6/COMT/CYP1A1/CYP1A2/CYP1B1/CYP2C8/CYP2D6/CYP3A4/CYP26A1/ENPEP/ESR1/GHR/TG/UGT2B7/RDH16/HSD17B6/CORIN/SULT1B1/DUOX2/ALDH8A1/BCO2/DUOXA2	26
BP	GO:0071466	cellular response to xenobiotic stimulus	22/880	180/18670	4.1106e-05	0.00102166	0.000886124	NAT2/BAAT/CDO1/CRHBP/CYP1A1/CYP1A2/CYP1B1/CYP2C8/CYP2D6/CYP2E1/CYP3A4/CYP26A1/ACSL1/FOXO1/FMO2/FMO3/GHR/UGT2B15/SULT1B1/CSAD/CYP2U1/APOBEC3A	22
BP	GO:0042094	interleukin-2 biosynthetic process	7/880	22/18670	4.61667e-05	0.00113654	0.000985766	CD3E/CD80/IRF4/PRKCQ/PTPRC/FOXP3/CLEC7A	7
BP	GO:0030101	natural killer cell activation	14/880	86/18670	4.62047e-05	0.00113654	0.000985766	PRDM1/CD2/IL12B/PIK3CD/PTPRC/NCR1/TOX/MERTK/KLRK1/PTPN22/IL21R/CD244/SLAMF7/KLRC4-KLRK1	14
BP	GO:0006721	terpenoid metabolic process	17/880	120/18670	4.72544e-05	0.0011564	0.00100299	ADH1A/ADH1B/ADH1C/ADH4/ADH6/CYP1A1/CYP1A2/CYP1B1/CYP2C8/CYP2D6/CYP2E1/CYP3A4/CYP26A1/HMGCS2/RDH16/ALDH8A1/BCO2	17
BP	GO:0002705	positive regulation of leukocyte mediated immunity	18/880	133/18670	5.30581e-05	0.0012918	0.00112043	B2M/CD1D/HPX/IL1R1/IL12B/SH2D1A/PTPRC/IL18RAP/CD226/CD160/KLRK1/TBX21/FOXP3/SASH3/CRTAM/RSAD2/SLAMF6/KLRC4-KLRK1	18
BP	GO:0009410	response to xenobiotic stimulus	30/880	292/18670	5.42205e-05	0.0013088	0.00113518	NAT2/BAAT/CDO1/CNR2/CRHBP/CYP1A1/CYP1A2/CYP1B1/CYP2C8/CYP2D6/CYP2E1/CYP3A4/CYP26A1/DHODH/DRD1/ACSL1/FOXO1/FMO2/FMO3/FOSB/GHR/GNAO1/NR4A2/PRKAR2B/UGT2B15/HDAC9/SULT1B1/CSAD/CYP2U1/APOBEC3A	30
BP	GO:0070231	T cell apoptotic process	10/880	47/18670	5.43049e-05	0.0013088	0.00113518	FASLG/BMP4/TSC22D3/IL7R/PRKCQ/CCL5/RIPK3/CD274/DOCK8/PTCRA	10
BP	GO:0051250	negative regulation of lymphocyte activation	19/880	146/18670	5.74046e-05	0.00137066	0.00118883	BMP4/RUNX3/CD80/IL10/SPN/TNFAIP3/MERTK/LILRB1/PTPN22/PLA2G2D/CD274/TBX21/FOXP3/LAX1/BANK1/SAMSN1/SLA2/TIGIT/CLEC4G	19
BP	GO:0002295	T-helper cell lineage commitment	6/880	16/18670	5.74461e-05	0.00137066	0.00118883	IL12B/IRF4/LY9/SPN/TBX21/SLAMF6	6
BP	GO:0055074	calcium ion homeostasis	42/880	471/18670	5.85782e-05	0.00139072	0.00120623	ADRA1B/FASLG/ATP2A3/MS4A1/CD38/CCR4/CCR5/CCR7/CCR8/ACKR2/DRD1/ESR1/FGF2/FPR2/FYN/XCR1/CXCR3/GPR17/GPR18/LCK/CXCL9/P2RX1/PIK3CG/PKHD1/PRKCB/PTGDR/PTGER2/PTPRC/SAA1/CCL3/CCL5/CCL8/CXCL12/GPR65/GPR55/CXCL13/CXCR6/GPR174/SLC24A4/JSRP1/MCOLN2/CCR2	42
BP	GO:0048525	negative regulation of viral process	15/880	99/18670	5.92797e-05	0.00140041	0.00121463	IFIT1/LTF/MBL2/MX1/OAS1/OAS3/PROX1/CCL3/CCL4/CCL5/CCL8/FCN3/ISG15/RSAD2/APOBEC3A	15
BP	GO:0042743	hydrogen peroxide metabolic process	11/880	57/18670	6.03968e-05	0.00141977	0.00123143	CYP1A1/CYP1A2/FYN/HBA1/HBA2/HBB/HP/MMP3/RAC2/DUOX2/DUOXA2	11
BP	GO:0042108	positive regulation of cytokine biosynthetic process	12/880	67/18670	6.10299e-05	0.00142762	0.00123823	CD3E/CD80/TNFRSF8/IL12B/IRF4/PRKCQ/PTPRC/SPN/TLR8/CLEC7A/TNFRSF13C/CCR2	12
BP	GO:0036037	CD8-positive, alpha-beta T cell activation	7/880	23/18670	6.36756e-05	0.00147505	0.00127937	RUNX3/TNFSF8/GPR18/NCKAP1L/EOMES/LILRB1/CD274	7
BP	GO:0071294	cellular response to zinc ion	7/880	23/18670	6.36756e-05	0.00147505	0.00127937	MT1E/MT1F/MT1G/MT1H/MT1M/MT1X/MT2A	7
BP	GO:0050856	regulation of T cell receptor signaling pathway	9/880	39/18670	6.51021e-05	0.00150081	0.00130171	CCR7/GBP1/LCK/TESPA1/CD226/CD160/PTPN22/TRAT1/UBASH3A	9
BP	GO:0050714	positive regulation of protein secretion	28/880	268/18670	7.09388e-05	0.0016275	0.0014116	ANG/BLK/C5/CD2/CD38/FGA/GCK/GLUL/IGF1/IGHD/IL10/ORM1/ORM2/SAA1/CCL3/IL1RL1/CD160/EXPH5/PTPN22/CD274/TLR8/CD244/CRTAM/C1QTNF3/C1QTNF4/CLEC9A/HCAR2/USP50	28
BP	GO:0043491	protein kinase B signaling	28/880	269/18670	7.57145e-05	0.00172875	0.00149942	AREG/CD80/CHI3L1/CCR7/ESR1/FGF2/FYN/IGF1/IGF2/IRS1/LCK/PIK3CD/PIK3CG/PKHD1/RAC2/CCL2/CCL3/CCL5/TEK/FGF18/MERTK/PIK3R5/ICOS/TRAT1/BANK1/TMEM100/SMPD3/P2RY12	28
BP	GO:0002704	negative regulation of leukocyte mediated immunity	10/880	49/18670	7.91294e-05	0.00179812	0.00155958	C4BPA/CR1/IL7R/PTPRC/CD84/LILRB1/TBX21/FOXP3/CLEC4G/CCR2	10
BP	GO:0002369	T cell cytokine production	9/880	40/18670	8.05206e-05	0.00181247	0.00157203	B2M/IL1R1/IL12B/IL18RAP/TBX21/FOXP3/SASH3/RSAD2/CCR2	9
BP	GO:0002823	negative regulation of adaptive immune response based on somatic recombination of immune receptors built from immunoglobulin superfamily domains	9/880	40/18670	8.05206e-05	0.00181247	0.00157203	C4BPA/CR1/IL7R/PTPRC/IL1RL1/LILRB1/TBX21/FOXP3/CLEC4G	9
BP	GO:0070227	lymphocyte apoptotic process	12/880	69/18670	8.22785e-05	0.00184335	0.00159881	FASLG/BMP4/CD3G/TSC22D3/IL7R/IL10/PRKCQ/CCL5/RIPK3/CD274/DOCK8/PTCRA	12
BP	GO:0002836	positive regulation of response to tumor cell	5/880	11/18670	8.3769e-05	0.00184867	0.00160342	IL12B/CD226/CD160/CD274/CRTAM	5
BP	GO:0002839	positive regulation of immune response to tumor cell	5/880	11/18670	8.3769e-05	0.00184867	0.00160342	IL12B/CD226/CD160/CD274/CRTAM	5
BP	GO:0045060	negative thymic T cell selection	5/880	11/18670	8.3769e-05	0.00184867	0.00160342	CD3E/CCR7/DOCK2/PTPRC/ZAP70	5
BP	GO:0045071	negative regulation of viral genome replication	11/880	59/18670	8.40655e-05	0.00184867	0.00160342	IFIT1/LTF/MX1/OAS1/OAS3/PROX1/CCL5/CCL8/ISG15/RSAD2/APOBEC3A	11
BP	GO:0002418	immune response to tumor cell	6/880	17/18670	8.52473e-05	0.00185753	0.00161111	IL12B/PRF1/CD226/CD160/CD274/CRTAM	6
BP	GO:0045072	regulation of interferon-gamma biosynthetic process	6/880	17/18670	8.52473e-05	0.00185753	0.00161111	IL12B/LILRB1/FOXP3/TLR8/CLEC7A/TNFRSF13C	6
BP	GO:0042738	exogenous drug catabolic process	7/880	24/18670	8.62549e-05	0.00186248	0.00161541	CYP1A2/CYP2C8/CYP2D6/CYP2E1/CYP3A4/CYP4B1/CYP2U1	7
BP	GO:0042832	defense response to protozoan	7/880	24/18670	8.62549e-05	0.00186248	0.00161541	IRF8/IL10/IL12B/IRF4/TSPAN32/CLEC7A/GBP6	7
BP	GO:0060333	interferon-gamma-mediated signaling pathway	14/880	91/18670	8.74378e-05	0.00187952	0.00163018	B2M/GBP1/HLA-DRB5/HPX/IRF8/IRF4/MT2A/OAS1/OAS2/OAS3/TXK/SOCS3/TRIM22/IRF9	14
BP	GO:0001523	retinoid metabolic process	15/880	104/18670	0.000105524	0.00225812	0.00195856	ADH1A/ADH1B/ADH1C/ADH4/ADH6/CYP1A1/CYP1A2/CYP1B1/CYP2C8/CYP2D6/CYP3A4/CYP26A1/RDH16/ALDH8A1/BCO2	15
BP	GO:0002687	positive regulation of leukocyte migration	17/880	128/18670	0.000107585	0.00229193	0.00198789	CCR7/FPR2/NCKAP1L/IL1R1/ITGA4/RAC2/CCL3/CCL4/CCL5/CCL8/CXCL12/SPN/CXCL14/CXCL13/P2RY12/DOCK8/CCR2	17
BP	GO:0030168	platelet activation	19/880	153/18670	0.000108724	0.00230591	0.00200001	FGA/FYN/GP1BA/GP5/HBB/LCK/P2RX1/PIK3CG/PLEK/PRKCB/PRKCQ/SAA1/THBD/GNA14/TSPAN32/MERTK/PIK3R5/CLEC1B/P2RY12	19
BP	GO:0001562	response to protozoan	7/880	25/18670	0.000114951	0.00240153	0.00208295	IRF8/IL10/IL12B/IRF4/TSPAN32/CLEC7A/GBP6	7
BP	GO:0050901	leukocyte tethering or rolling	7/880	25/18670	0.000114951	0.00240153	0.00208295	ADD2/ITGA4/ITGB7/CXCL12/SELE/SPN/CCR2	7
BP	GO:0034113	heterotypic cell-cell adhesion	11/880	61/18670	0.000115245	0.00240153	0.00208295	CD1D/CD2/FGA/IL1RN/IL10/ITGA4/ITGAD/ITGB7/LCK/PTPRC/IZUMO1	11
BP	GO:2000514	regulation of CD4-positive, alpha-beta T cell activation	11/880	61/18670	0.000115245	0.00240153	0.00208295	RUNX3/CD80/NCKAP1L/IL12B/IRF4/PRKCQ/CD160/CD274/TBX21/FOXP3/SASH3	11
BP	GO:0042095	interferon-gamma biosynthetic process	6/880	18/18670	0.000122787	0.00254756	0.0022096	IL12B/LILRB1/FOXP3/TLR8/CLEC7A/TNFRSF13C	6
BP	GO:0032102	negative regulation of response to external stimulus	34/880	365/18670	0.000126681	0.00261698	0.00226981	C5/CNR2/CTNNA2/DRD1/FGA/FGF2/FPR2/GP1BA/GPR17/GPR18/IGF1/IL10/IL12B/KLKB1/KRT1/LDLR/LTF/PLG/PTPRC/SAA1/CCL2/TEK/THBD/TNFAIP3/TNR/SEMA3B/CST7/SOCS3/CXCL13/KLRK1/STAP1/FOXP3/C1QTNF3/KLRC4-KLRK1	34
BP	GO:0002260	lymphocyte homeostasis	11/880	62/18670	0.000134215	0.00276067	0.00239444	TNFRSF17/TSC22D3/NCKAP1L/TNFAIP3/RIPK3/SIT1/FOXP3/DOCK10/GPR174/TNFRSF13C/DOCK11	11
BP	GO:0006069	ethanol oxidation	5/880	12/18670	0.000138032	0.00281491	0.00244149	ADH1A/ADH1B/ADH1C/ADH4/ADH6	5
BP	GO:0072540	T-helper 17 cell lineage commitment	5/880	12/18670	0.000138032	0.00281491	0.00244149	IL12B/IRF4/LY9/TBX21/SLAMF6	5
BP	GO:0060337	type I interferon signaling pathway	14/880	95/18670	0.000140547	0.00284191	0.0024649	IFI6/IRF8/IFI27/IFIT1/IRF4/MX1/OAS1/OAS2/OAS3/ISG15/IRF9/XAF1/ZBP1/RSAD2	14
BP	GO:0071357	cellular response to type I interferon	14/880	95/18670	0.000140547	0.00284191	0.0024649	IFI6/IRF8/IFI27/IFIT1/IRF4/MX1/OAS1/OAS2/OAS3/ISG15/IRF9/XAF1/ZBP1/RSAD2	14
BP	GO:0098754	detoxification	17/880	131/18670	0.000143564	0.00289067	0.0025072	ADH4/ALB/GCH1/GSTZ1/HBA1/HBA2/HBB/HP/MT1E/MT1F/MT1G/MT1H/MT1M/MT1X/MT2A/IPCEF1/DUOX2	17
BP	GO:0032103	positive regulation of response to external stimulus	31/880	323/18670	0.000145304	0.00291341	0.00252692	CD6/CCR4/CCR7/FABP4/FGF2/FPR2/NCKAP1L/IL6ST/IL12B/KLKB1/LDLR/PIK3CG/PLG/RAC2/CCL3/CCL4/CCL5/CCL18/CXCL12/THBD/FGF18/IL1RL1/CXCL14/CXCL13/STAP1/DDX60/CLEC7A/P2RY12/CREB3L3/GBP5/CCR2	31
BP	GO:0002360	T cell lineage commitment	7/880	26/18670	0.000150942	0.00301378	0.00261397	IL12B/IRF4/LY9/SPN/TBX21/FOXP3/SLAMF6	7
BP	GO:0046686	response to cadmium ion	11/880	63/18670	0.000155777	0.00309028	0.00268032	ALAD/B2M/CYB5A/CYP1A2/MT1E/MT1F/MT1G/MT1H/MT1M/MT1X/MT2A	11
BP	GO:0051607	defense response to virus	25/880	238/18670	0.000156068	0.00309028	0.00268032	IFI6/GBP1/IFI27/IFIT1/IL12B/CXCL9/MX1/OAS1/OAS2/OAS3/PRF1/PTPRC/TNFAIP3/FCN3/ISG15/TSPAN32/TRIM22/IRF9/LILRB1/IFI44L/HERC5/TLR8/DDX60/RSAD2/APOBEC3A	25
BP	GO:0006968	cellular defense response	10/880	53/18670	0.000158312	0.00312176	0.00270763	CD5L/CCR5/ITK/SH2D1A/CXCL9/PRF1/SPN/NCR1/TRAT1/CCR2	10
BP	GO:0002689	negative regulation of leukocyte chemotaxis	6/880	19/18670	0.000172329	0.00337031	0.00292321	C5/GPR18/CCL2/KLRK1/STAP1/KLRC4-KLRK1	6
BP	GO:0002710	negative regulation of T cell mediated immunity	6/880	19/18670	0.000172329	0.00337031	0.00292321	IL7R/PTPRC/LILRB1/TBX21/FOXP3/CLEC4G	6
BP	GO:0046688	response to copper ion	9/880	44/18670	0.000176279	0.00343349	0.002978	CYP1A1/CYP1A2/MT1E/MT1F/MT1G/MT1H/MT1M/MT1X/MT2A	9
BP	GO:0016101	diterpenoid metabolic process	15/880	110/18670	0.000200066	0.00388095	0.0033661	ADH1A/ADH1B/ADH1C/ADH4/ADH6/CYP1A1/CYP1A2/CYP1B1/CYP2C8/CYP2D6/CYP3A4/CYP26A1/RDH16/ALDH8A1/BCO2	15
BP	GO:0072577	endothelial cell apoptotic process	11/880	65/18670	0.000207814	0.00401493	0.00348231	FASLG/COL4A3/FGA/IL10/ITGA4/MAP3K5/CCL2/TEK/TNFAIP3/CD160/ANGPTL4	11
BP	GO:0001867	complement activation, lectin pathway	5/880	13/18670	0.00021561	0.00413209	0.00358393	FCN2/KRT1/MBL2/FCN3/COLEC10	5
BP	GO:0045059	positive thymic T cell selection	5/880	13/18670	0.00021561	0.00413209	0.00358393	CD3E/CD3G/DOCK2/PTPRC/ZAP70	5
BP	GO:0043551	regulation of phosphatidylinositol 3-kinase activity	10/880	55/18670	0.000218079	0.0041627	0.00361048	CCR7/FGF2/FPR2/IRS1/TEK/SOCS2/SOCS3/PIK3R5/P2RY12/SLA2	10
BP	GO:0034340	response to type I interferon	14/880	99/18670	0.000219541	0.00417389	0.00362019	IFI6/IRF8/IFI27/IFIT1/IRF4/MX1/OAS1/OAS2/OAS3/ISG15/IRF9/XAF1/ZBP1/RSAD2	14
BP	GO:0008202	steroid metabolic process	31/880	331/18670	0.000224949	0.00425974	0.00369465	BAAT/COMT/CYP1A1/CYP1A2/CYP1B1/CYP2C8/CYP2D6/CYP2E1/CYP3A4/CYP26A1/ESR1/G6PC/GC/HMGCS2/LCAT/LDLR/PBX1/PROX1/SORL1/SULT2A1/UGT2B7/UGT2B15/UGT2B17/RDH16/HSD17B6/ACAA2/SLC27A2/AMACR/SULT4A1/SULT1B1/APOA5	31
BP	GO:0002793	positive regulation of peptide secretion	28/880	288/18670	0.000241642	0.00455777	0.00395314	ANG/BLK/C5/CD2/CD38/FGA/GCK/GLUL/IGF1/IGHD/IL10/ORM1/ORM2/SAA1/CCL3/IL1RL1/CD160/EXPH5/PTPN22/CD274/TLR8/CD244/CRTAM/C1QTNF3/C1QTNF4/CLEC9A/HCAR2/USP50	28
BP	GO:0051897	positive regulation of protein kinase B signaling	20/880	176/18670	0.000245687	0.00461582	0.00400348	AREG/CD80/CHI3L1/CCR7/ESR1/FGF2/FYN/IGF2/IRS1/LCK/PIK3CD/PIK3CG/RAC2/CCL3/TEK/FGF18/PIK3R5/ICOS/TRAT1/P2RY12	20
BP	GO:0050920	regulation of chemotaxis	23/880	217/18670	0.000247021	0.00462269	0.00400944	C5/CCR4/CCR7/FGF2/FPR2/GPR18/NCKAP1L/RAC2/CCL2/CCL3/CCL4/CCL5/CXCL12/SEMA3B/FGF18/CXCL14/CXCL13/KLRK1/STAP1/P2RY12/PLXNA4/CCR2/KLRC4-KLRK1	23
BP	GO:0001773	myeloid dendritic cell activation	7/880	28/18670	0.000250192	0.00464558	0.0040293	CAMK4/CD2/DOCK2/IL10/IRF4/SLAMF1/TSPAN32	7
BP	GO:0010818	T cell chemotaxis	7/880	28/18670	0.000250192	0.00464558	0.0040293	CXCR3/PIK3CD/PIK3CG/CCL3/CCL5/CXCL13/CCR2	7
BP	GO:0048872	homeostasis of number of cells	25/880	246/18670	0.000260942	0.00482641	0.00418614	B2M/TNFRSF17/BMP4/CCR4/CCR7/TSC22D3/NCKAP1L/IL7R/PDE4B/PIK3CD/TAL1/TNFAIP3/ISG15/IKZF1/MERTK/RIPK3/SIT1/FOXP3/SASH3/DOCK10/GPR174/TNFRSF13C/DOCK11/HCAR2/CCR2	25
BP	GO:0071276	cellular response to cadmium ion	8/880	37/18670	0.000269123	0.0049585	0.00430071	CYP1A2/MT1E/MT1F/MT1G/MT1H/MT1M/MT1X/MT2A	8
BP	GO:0002700	regulation of production of molecular mediator of immune response	17/880	139/18670	0.000295341	0.00539987	0.00468353	B2M/HPX/IL1R1/IL10/PTPRC/NR4A3/CD226/LILRB1/CD160/TBX21/FOXP3/MZB1/CD244/SASH3/RSAD2/FCRL3/CCR2	17
BP	GO:0006720	isoprenoid metabolic process	17/880	139/18670	0.000295341	0.00539987	0.00468353	ADH1A/ADH1B/ADH1C/ADH4/ADH6/CYP1A1/CYP1A2/CYP1B1/CYP2C8/CYP2D6/CYP2E1/CYP3A4/CYP26A1/HMGCS2/RDH16/ALDH8A1/BCO2	17
BP	GO:0042035	regulation of cytokine biosynthetic process	15/880	114/18670	0.000297823	0.00542447	0.00470486	CD3E/CD80/TNFRSF8/IL10/IL12B/IRF4/PRKCQ/PTPRC/SPN/LILRB1/FOXP3/TLR8/CLEC7A/TNFRSF13C/CCR2	15
BP	GO:0002367	cytokine production involved in immune response	14/880	102/18670	0.000301492	0.00547042	0.00474471	B2M/IL1R1/IL10/IL12B/NR4A3/IL18RAP/CD226/LILRB1/CD160/TBX21/FOXP3/SASH3/RSAD2/CCR2	14
BP	GO:0050855	regulation of B cell receptor signaling pathway	7/880	29/18670	0.000316493	0.00557445	0.00483494	BLK/PAX5/PRKCB/PTPN22/STAP1/FCRL3/GCSAM	7
BP	GO:0070229	negative regulation of lymphocyte apoptotic process	7/880	29/18670	0.000316493	0.00557445	0.00483494	BMP4/TSC22D3/IL7R/PRKCQ/CCL5/DOCK8/PTCRA	7
BP	GO:0072538	T-helper 17 type immune response	7/880	29/18670	0.000316493	0.00557445	0.00483494	IL12B/IRF4/LY9/PRKCQ/TBX21/FOXP3/SLAMF6	7
BP	GO:0045061	thymic T cell selection	6/880	21/18670	0.000317858	0.00557445	0.00483494	CD3E/CD3G/CCR7/DOCK2/PTPRC/ZAP70	6
BP	GO:0048245	eosinophil chemotaxis	6/880	21/18670	0.000317858	0.00557445	0.00483494	CCL2/CCL3/CCL4/CCL5/CCL8/CCL4L1	6
BP	GO:0140131	positive regulation of lymphocyte chemotaxis	6/880	21/18670	0.000317858	0.00557445	0.00483494	CCL3/CCL4/CCL5/CXCL14/CXCL13/CCR2	6
BP	GO:0042737	drug catabolic process	17/880	140/18670	0.000321724	0.00557445	0.00483494	COMT/CYP1A2/CYP2C8/CYP2D6/CYP2E1/CYP3A4/CYP4B1/GSTZ1/HBA1/HBA2/HBB/HP/SULT2A1/SULT1B1/DUOX2/HAO1/CYP2U1	17
BP	GO:0001771	immunological synapse formation	5/880	14/18670	0.000322412	0.00557445	0.00483494	CD6/CCR7/DOCK2/PRF1/DOCK8	5
BP	GO:0002834	regulation of response to tumor cell	5/880	14/18670	0.000322412	0.00557445	0.00483494	IL12B/CD226/CD160/CD274/CRTAM	5
BP	GO:0002837	regulation of immune response to tumor cell	5/880	14/18670	0.000322412	0.00557445	0.00483494	IL12B/CD226/CD160/CD274/CRTAM	5
BP	GO:0043374	CD8-positive, alpha-beta T cell differentiation	5/880	14/18670	0.000322412	0.00557445	0.00483494	RUNX3/TNFSF8/GPR18/NCKAP1L/EOMES	5
BP	GO:0046629	gamma-delta T cell activation	5/880	14/18670	0.000322412	0.00557445	0.00483494	EGR3/GPR18/NCKAP1L/PTPRC/LILRB1	5
BP	GO:0050862	positive regulation of T cell receptor signaling pathway	5/880	14/18670	0.000322412	0.00557445	0.00483494	CCR7/LCK/TESPA1/CD226/TRAT1	5
BP	GO:0002707	negative regulation of lymphocyte mediated immunity	8/880	38/18670	0.000326956	0.00563262	0.0048854	C4BPA/CR1/IL7R/PTPRC/LILRB1/TBX21/FOXP3/CLEC4G	8
BP	GO:1904894	positive regulation of STAT cascade	13/880	92/18670	0.000367436	0.00630721	0.0054705	CTF1/CYP1B1/FYN/GHR/HPX/IGF1/IL6ST/IL7R/IL10/IL12B/CCL5/SOCS3/IL24	13
BP	GO:0050766	positive regulation of phagocytosis	11/880	70/18670	0.000405553	0.00693656	0.00601635	DOCK2/FPR2/NCKAP1L/IL2RB/MBL2/PTPRC/CCL2/MERTK/STAP1/SIRPG/CLEC7A	11
BP	GO:0072643	interferon-gamma secretion	6/880	22/18670	0.000419742	0.0071536	0.0062046	CD2/ISG15/LILRB1/CD160/PTPN22/CD244	6
BP	GO:0055076	transition metal ion homeostasis	16/880	131/18670	0.00044685	0.00758851	0.00658182	B2M/GDF2/HPX/LCK/LTF/MT1E/MT1F/MT1G/MT1H/MT1M/MT1X/MT2A/SLC30A2/HAMP/STEAP4/TMC8	16
BP	GO:0019835	cytolysis	8/880	40/18670	0.000473035	0.00800468	0.00694278	C5/C8A/C9/GZMA/GZMB/KRT6A/PRF1/LILRB1	8
BP	GO:0019932	second-messenger-mediated signaling	37/880	439/18670	0.000475608	0.00801979	0.00695589	ADRA1B/APLP1/CD3E/CCR4/CCR5/CCR7/CCR8/ACKR2/DRD1/RCAN1/FPR2/GBP1/XCR1/CXCR3/IGF1/CXCL9/MT2A/PLEK/PRKAR2B/PTGER2/PTPRC/CCL3/CCL4/SELE/TCP11/ZAP70/GPR65/CXCR6/TRAT1/PDE11A/TMEM100/P2RY12/SLA2/JSRP1/BHLHA15/CCR2/PLA2G4B	37
BP	GO:0002724	regulation of T cell cytokine production	7/880	31/18670	0.000491114	0.00822315	0.00713227	B2M/IL1R1/TBX21/FOXP3/SASH3/RSAD2/CCR2	7
BP	GO:2000406	positive regulation of T cell migration	7/880	31/18670	0.000491114	0.00822315	0.00713227	ITGA4/CCL5/CXCL12/SPN/CXCL13/DOCK8/CCR2	7
BP	GO:0050708	regulation of protein secretion	39/880	472/18670	0.000499813	0.00833954	0.00723322	ANG/BLK/C5/CD2/CD38/CCR7/FGA/GBP1/GCK/GLUL/IGF1/IGHD/IL10/IRS1/ORM1/ORM2/SAA1/CCL3/CCL5/TNFAIP3/IL1RL1/HDAC9/LILRB1/CD160/EXPH5/PTPN22/CD274/FOXP3/TLR8/CD244/BANK1/CRTAM/RSAD2/C1QTNF3/C1QTNF4/SLC9B2/CLEC9A/HCAR2/USP50	39
BP	GO:0002702	positive regulation of production of molecular mediator of immune response	13/880	95/18670	0.000504419	0.00838706	0.00727444	B2M/HPX/IL1R1/PTPRC/NR4A3/CD226/LILRB1/CD160/TBX21/MZB1/CD244/SASH3/RSAD2	13
BP	GO:1903556	negative regulation of tumor necrosis factor superfamily cytokine production	11/880	72/18670	0.000520011	0.00860282	0.00746157	GPR18/IGF1/IL10/LTF/ORM1/SLAMF1/TNFAIP3/LILRB1/PTPN22/CD274/FOXP3	11
BP	GO:0050701	interleukin-1 secretion	10/880	61/18670	0.000521001	0.00860282	0.00746157	CCR7/IGHD/ORM1/ORM2/SAA1/CCL3/TNFAIP3/TLR8/GBP5/USP50	10
BP	GO:0002347	response to tumor cell	6/880	23/18670	0.000545412	0.00897485	0.00778425	IL12B/PRF1/CD226/CD160/CD274/CRTAM	6
BP	GO:0002718	regulation of cytokine production involved in immune response	12/880	84/18670	0.000552457	0.00905954	0.0078577	B2M/IL1R1/IL10/NR4A3/CD226/LILRB1/CD160/TBX21/FOXP3/SASH3/RSAD2/CCR2	12
BP	GO:0045089	positive regulation of innate immune response	33/880	381/18670	0.000588736	0.0096214	0.00834503	CD1D/ESR1/FGA/FPR2/FYN/HPX/IL12B/IRF4/LTF/SH2D1A/CCL5/TNFAIP3/TXK/MARCO/IL18RAP/CD226/CD160/KLRK1/GRAMD4/PTPN22/TLR8/DDX60/CRTAM/CLEC7A/TNIP3/ALPK1/ZBP1/RSAD2/SLAMF6/FCRL3/GBP5/PYHIN1/KLRC4-KLRK1	33
BP	GO:0008210	estrogen metabolic process	7/880	32/18670	0.000603324	0.00982615	0.00852262	COMT/CYP1A1/CYP1A2/CYP1B1/CYP2C8/CYP2D6/CYP3A4	7
BP	GO:1903901	negative regulation of viral life cycle	12/880	85/18670	0.000616209	0.0100019	0.00867502	IFIT1/LTF/MX1/OAS1/OAS3/PROX1/CCL5/CCL8/FCN3/ISG15/RSAD2/APOBEC3A	12
BP	GO:0019079	viral genome replication	15/880	122/18670	0.000620801	0.0100422	0.00871005	IFI27/IFIT1/LTF/MX1/OAS1/OAS3/PROX1/CCL2/CCL5/CCL8/ISG15/CLEC4M/CXCR6/RSAD2/APOBEC3A	15
BP	GO:0001780	neutrophil homeostasis	5/880	16/18670	0.000650137	0.0104109	0.0090298	PDE4B/PIK3CD/MERTK/HCAR2/CCR2	5
BP	GO:0006957	complement activation, alternative pathway	5/880	16/18670	0.000650137	0.0104109	0.0090298	C5/C8A/C9/CR1/CFP	5
BP	GO:0032695	negative regulation of interleukin-12 production	5/880	16/18670	0.000650137	0.0104109	0.0090298	IL10/SLAMF1/LILRB1/TLR8/TIGIT	5
BP	GO:0042089	cytokine biosynthetic process	15/880	123/18670	0.000676905	0.0107899	0.00935854	CD3E/CD80/TNFRSF8/IL10/IL12B/IRF4/PRKCQ/PTPRC/SPN/LILRB1/FOXP3/TLR8/CLEC7A/TNFRSF13C/CCR2	15
BP	GO:0046637	regulation of alpha-beta T cell differentiation	10/880	63/18670	0.000678327	0.0107899	0.00935854	PRDM1/RUNX3/CD80/NCKAP1L/IL12B/IRF4/ZAP70/TBX21/FOXP3/SASH3	10
BP	GO:0060191	regulation of lipase activity	13/880	98/18670	0.000682345	0.0108178	0.00938268	ANG/ESR1/FGF2/ITK/CCL5/SELE/TXK/GPR55/HDAC9/ANGPTL4/P2RY12/APOA5/ANXA8	13
BP	GO:0032760	positive regulation of tumor necrosis factor production	12/880	86/18670	0.000686017	0.01084	0.00940195	CD2/TNFRSF8/IL12B/ORM1/ORM2/PTPRC/CCL3/SPN/SASH3/CLEC7A/C1QTNF4/CCR2	12
BP	GO:0033081	regulation of T cell differentiation in thymus	6/880	24/18670	0.000698464	0.0110002	0.00954095	BMP4/CAMK4/EGR3/IL7R/TESPA1/FOXP3	6
BP	GO:0050777	negative regulation of immune response	17/880	150/18670	0.000719328	0.0112916	0.00979362	C4BPA/CR1/GPR17/IL7R/IL10/IL12B/PTPRC/TNFAIP3/CD84/IL1RL1/LILRB1/CD160/TBX21/FOXP3/SAMSN1/CLEC4G/CCR2	17
BP	GO:0001914	regulation of T cell mediated cytotoxicity	7/880	33/18670	0.00073496	0.01146	0.00993971	B2M/CD1D/IL7R/IL12B/PTPRC/LILRB1/RIPK3	7
BP	GO:0046633	alpha-beta T cell proliferation	7/880	33/18670	0.00073496	0.01146	0.00993971	CD3E/DOCK2/IL12B/PTPRC/ZAP70/CD274/CCR2	7
BP	GO:0042107	cytokine metabolic process	15/880	124/18670	0.000737262	0.01146	0.00993971	CD3E/CD80/TNFRSF8/IL10/IL12B/IRF4/PRKCQ/PTPRC/SPN/LILRB1/FOXP3/TLR8/CLEC7A/TNFRSF13C/CCR2	15
BP	GO:0006816	calcium ion transport	36/880	434/18670	0.000754053	0.0115721	0.010037	FASLG/ATP2A3/MS4A1/CCR5/CCR7/DRD1/FGF2/FGF14/FYN/GCK/GNAO1/GPM6A/LCK/CXCL9/P2RX1/PDE4B/PIK3CG/PRKCB/PTPRC/CCL2/CCL3/CCL4/CCL5/CCL8/CXCL12/CD84/CACNA1I/LILRB1/P2RY12/SLC25A25/FCRL3/SLC24A4/JSRP1/BHLHA15/MCOLN2/PKD1L3	36
BP	GO:0032715	negative regulation of interleukin-6 production	9/880	53/18670	0.000754175	0.0115721	0.010037	NCKAP1L/IL10/ORM1/SLAMF1/TNFAIP3/PTPN22/FOXP3/BANK1/C1QTNF3	9
BP	GO:0050704	regulation of interleukin-1 secretion	9/880	53/18670	0.000754175	0.0115721	0.010037	CCR7/IGHD/ORM1/ORM2/SAA1/CCL3/TNFAIP3/TLR8/USP50	9
BP	GO:1905517	macrophage migration	9/880	53/18670	0.000754175	0.0115721	0.010037	C5/SAA1/CCL2/CCL3/CCL5/STAP1/P2RY12/MCOLN2/CCR2	9
BP	GO:0043550	regulation of lipid kinase activity	10/880	64/18670	0.000770571	0.0117858	0.0102223	CCR7/FGF2/FPR2/IRS1/TEK/SOCS2/SOCS3/PIK3R5/P2RY12/SLA2	10
BP	GO:0010863	positive regulation of phospholipase C activity	8/880	43/18670	0.000787241	0.011957	0.0103708	ANG/ESR1/FGF2/ITK/SELE/TXK/GPR55/P2RY12	8
BP	GO:1990573	potassium ion import across plasma membrane	8/880	43/18670	0.000787241	0.011957	0.0103708	ATP1A3/HCN2/KCNJ1/KCNJ5/KCNJ6/KCNJ8/KCNJ10/SLC12A1	8
BP	GO:0050868	negative regulation of T cell activation	14/880	112/18670	0.000789285	0.011957	0.0103708	BMP4/RUNX3/CD80/IL10/SPN/LILRB1/PTPN22/PLA2G2D/CD274/TBX21/FOXP3/LAX1/TIGIT/CLEC4G	14
BP	GO:0002791	regulation of peptide secretion	40/880	500/18670	0.00080076	0.0120925	0.0104883	ANG/BLK/C5/CD2/CD38/CCR7/CRHBP/FGA/GBP1/GCK/GLUL/IGF1/IGHD/IL10/IRS1/ORM1/ORM2/SAA1/CCL3/CCL5/TNFAIP3/IL1RL1/HDAC9/LILRB1/CD160/EXPH5/PTPN22/CD274/FOXP3/TLR8/CD244/BANK1/CRTAM/RSAD2/C1QTNF3/C1QTNF4/SLC9B2/CLEC9A/HCAR2/USP50	40
BP	GO:0045088	regulation of innate immune response	37/880	452/18670	0.000817948	0.012256	0.0106301	CD1D/CR1/ESR1/FGA/FPR2/FYN/HPX/IL12B/IRF4/LTF/SH2D1A/CCL5/TNFAIP3/TXK/MARCO/IL18RAP/SOCS3/NCR1/CD226/LILRB1/CD160/KLRK1/GRAMD4/PTPN22/TLR8/DDX60/CRTAM/CLEC7A/TNIP3/ALPK1/ZBP1/RSAD2/SLAMF6/FCRL3/GBP5/PYHIN1/KLRC4-KLRK1	37
BP	GO:0006547	histidine metabolic process	4/880	10/18670	0.000819292	0.012256	0.0106301	HDC/MTHFD1/FTCD/MTHFD2L	4
BP	GO:0032621	interleukin-18 production	4/880	10/18670	0.000819292	0.012256	0.0106301	IL10/CD84/GBP5/USP50	4
BP	GO:1903557	positive regulation of tumor necrosis factor superfamily cytokine production	12/880	88/18670	0.000845597	0.01261	0.0109371	CD2/TNFRSF8/IL12B/ORM1/ORM2/PTPRC/CCL3/SPN/SASH3/CLEC7A/C1QTNF4/CCR2	12
BP	GO:0032655	regulation of interleukin-12 production	9/880	54/18670	0.000867772	0.0129003	0.011189	CCR7/IRF8/IL10/IL12B/SLAMF1/LILRB1/TLR8/CLEC7A/TIGIT	9
BP	GO:0002548	monocyte chemotaxis	10/880	65/18670	0.000872891	0.0129361	0.01122	FPR2/CCL2/CCL3/CCL4/CCL5/CCL8/CCL18/CXCL12/CCL4L1/CCR2	10
BP	GO:0002507	tolerance induction	6/880	25/18670	0.000882732	0.0129621	0.0112425	CD3E/CCR4/TNFAIP3/CD274/ICOS/FOXP3	6
BP	GO:0072677	eosinophil migration	6/880	25/18670	0.000882732	0.0129621	0.0112425	CCL2/CCL3/CCL4/CCL5/CCL8/CCL4L1	6
BP	GO:0045725	positive regulation of glycogen biosynthetic process	5/880	17/18670	0.000885507	0.0129621	0.0112425	GCK/IGF1/IGF2/IRS1/PPP1R3G	5
BP	GO:0050665	hydrogen peroxide biosynthetic process	5/880	17/18670	0.000885507	0.0129621	0.0112425	CYP1A1/CYP1A2/FYN/DUOX2/DUOXA2	5
BP	GO:2000404	regulation of T cell migration	8/880	44/18670	0.00092301	0.0134697	0.0116828	ITGA4/CCL5/CXCL12/SPN/CXCL13/RIPK3/DOCK8/CCR2	8
BP	GO:0046427	positive regulation of JAK-STAT cascade	12/880	89/18670	0.00093632	0.0136223	0.0118152	CTF1/CYP1B1/FYN/GHR/HPX/IGF1/IL6ST/IL10/IL12B/CCL5/SOCS3/IL24	12
BP	GO:0032613	interleukin-10 production	9/880	55/18670	0.000994886	0.0144304	0.0125161	IL12B/IRF4/ISG15/LILRB1/CD274/FOXP3/SASH3/CLEC7A/TIGIT	9
BP	GO:0032612	interleukin-1 production	14/880	115/18670	0.00102687	0.0148492	0.0128793	CCR7/IGF1/IGHD/IL10/ORM1/ORM2/SAA1/CCL3/TNFAIP3/TLR8/CLEC7A/GBP5/PYHIN1/USP50	14
BP	GO:0070664	negative regulation of leukocyte proliferation	11/880	78/18670	0.00103594	0.0149351	0.0129538	BMP4/CD80/IL10/CCL8/SPN/TNFAIP3/LILRB1/PLA2G2D/CD274/FOXP3/CLEC4G	11
BP	GO:1903706	regulation of hemopoiesis	38/880	475/18670	0.0010702	0.0153492	0.013313	B2M/PRDM1/BMP4/CAMK4/RUNX3/CD2/CD80/CR1/EGR3/EVI2B/FOXC1/GP1BA/NCKAP1L/IL7R/IL12B/IRF4/LTF/PRKCB/PRKCQ/PTPRC/CCL3/TAL1/KLF10/ZAP70/NR4A3/GPR55/ISG15/TOX/TESPA1/LILRB1/IKZF3/GPR171/TBX21/FOXP3/SASH3/FCRL3/SLC9B2/CCR2	38
BP	GO:0018108	peptidyl-tyrosine phosphorylation	31/880	363/18670	0.0010711	0.0153492	0.013313	AREG/BLK/CD3E/CD80/CTF1/FYN/GHR/HPX/IGF1/IGF2/IL6ST/IL12B/IL12RB2/ITK/LCK/PTPRC/CCL5/SLA/TAL1/TEK/TXK/ZAP70/SOCS3/SH3BP5/MERTK/IL24/STAP1/BANK1/STYK1/CASS4/SAMSN1	31
BP	GO:1900274	regulation of phospholipase C activity	8/880	45/18670	0.00107691	0.0153862	0.0133451	ANG/ESR1/FGF2/ITK/SELE/TXK/GPR55/P2RY12	8
BP	GO:0032652	regulation of interleukin-1 production	13/880	103/18670	0.00109545	0.0156044	0.0135343	CCR7/IGF1/IGHD/IL10/ORM1/ORM2/SAA1/CCL3/TNFAIP3/TLR8/CLEC7A/PYHIN1/USP50	13
BP	GO:0072539	T-helper 17 cell differentiation	6/880	26/18670	0.00110227	0.0156548	0.0135781	IL12B/IRF4/LY9/TBX21/FOXP3/SLAMF6	6
BP	GO:1903038	negative regulation of leukocyte cell-cell adhesion	15/880	129/18670	0.00111215	0.0157483	0.0136591	BMP4/RUNX3/CD80/IL10/CXCL12/SPN/LILRB1/PTPN22/PLA2G2D/CD274/TBX21/FOXP3/LAX1/TIGIT/CLEC4G	15
BP	GO:0016042	lipid catabolic process	29/880	333/18670	0.0011328	0.0159933	0.0138716	CYP1A2/CYP1B1/CYP3A4/CYP26A1/ETFDH/FABP4/IRS1/LDLR/PIK3CG/SORL1/SULT2A1/HSD17B6/LIPG/ACAA2/SLC27A2/AMACR/PLA2G2D/NAAA/HAO1/SMPD3/BCO2/ABHD1/APOA5/ACER1/CES5A/HCAR2/PLCXD3/PNPLA7/PLA2G4B	29
BP	GO:0032615	interleukin-12 production	9/880	56/18670	0.00113668	0.0160006	0.013878	CCR7/IRF8/IL10/IL12B/SLAMF1/LILRB1/TLR8/CLEC7A/TIGIT	9
BP	GO:0070875	positive regulation of glycogen metabolic process	5/880	18/18670	0.00117886	0.0165457	0.0143507	GCK/IGF1/IGF2/IRS1/PPP1R3G	5
BP	GO:0043901	negative regulation of multi-organism process	18/880	171/18670	0.00121244	0.0169671	0.0147162	IFIT1/IGF1/KRT6A/LTF/MBL2/MX1/OAS1/OAS3/PROX1/CCL3/CCL4/CCL5/CCL8/TNFAIP3/FCN3/ISG15/RSAD2/APOBEC3A	18
BP	GO:0018212	peptidyl-tyrosine modification	31/880	366/18670	0.00122252	0.0170581	0.0147952	AREG/BLK/CD3E/CD80/CTF1/FYN/GHR/HPX/IGF1/IGF2/IL6ST/IL12B/IL12RB2/ITK/LCK/PTPRC/CCL5/SLA/TAL1/TEK/TXK/ZAP70/SOCS3/SH3BP5/MERTK/IL24/STAP1/BANK1/STYK1/CASS4/SAMSN1	31
BP	GO:0002923	regulation of humoral immune response mediated by circulating immunoglobulin	4/880	11/18670	0.00123959	0.0171957	0.0149145	C4BPA/CR1/HPX/PTPRC	4
BP	GO:0033089	positive regulation of T cell differentiation in thymus	4/880	11/18670	0.00123959	0.0171957	0.0149145	EGR3/IL7R/TESPA1/FOXP3	4
BP	GO:0050918	positive chemotaxis	10/880	68/18670	0.00124865	0.0172712	0.01498	BMP4/CCR4/FGF2/FPR2/SAA1/SAA2/CCL3/CCL5/CXCL12/COLEC10	10
BP	GO:2000516	positive regulation of CD4-positive, alpha-beta T cell activation	7/880	36/18670	0.00126998	0.0175154	0.0151918	CD80/NCKAP1L/IL12B/PRKCQ/CD160/FOXP3/SASH3	7
BP	GO:1903532	positive regulation of secretion by cell	33/880	399/18670	0.00128909	0.0177278	0.015376	ANG/BLK/C5/CD2/CD38/FGA/GCK/GLUL/IGF1/IGHD/IL10/ORM1/ORM2/SAA1/CCL3/CXCL12/SLC6A4/CACNA1I/IL1RL1/RAB3D/CD160/EXPH5/PTPN22/CD274/TLR8/CD244/SMPD3/CRTAM/C1QTNF3/C1QTNF4/CLEC9A/HCAR2/USP50	33
BP	GO:0070374	positive regulation of ERK1 and ERK2 cascade	21/880	215/18670	0.00130278	0.0178646	0.0154947	BMP4/CHI3L1/CCR7/FGA/FGF2/FPR2/PTPRC/CCL2/CCL3/CCL4/CCL5/CCL8/CCL18/SLAMF1/TEK/MARCO/FGF18/GPR55/PTPN22/SCIMP/CCL4L1	21
BP	GO:0036336	dendritic cell migration	6/880	27/18670	0.00136133	0.018614	0.0161447	CCR5/CCR7/PIK3CG/CCL5/DOCK8/CCR2	6
BP	GO:0006953	acute-phase response	8/880	47/18670	0.00144592	0.0196579	0.0170501	SERPINA3/HP/MBL2/ORM1/ORM2/SAA1/SAA2/HAMP	8
BP	GO:0043370	regulation of CD4-positive, alpha-beta T cell differentiation	8/880	47/18670	0.00144592	0.0196579	0.0170501	RUNX3/CD80/NCKAP1L/IL12B/IRF4/TBX21/FOXP3/SASH3	8
BP	GO:0042542	response to hydrogen peroxide	16/880	146/18670	0.00145672	0.0197485	0.0171286	AREG/CYP1B1/FOXO1/FYN/GNAO1/HBA1/HBA2/HBB/HP/IL10/MAP3K5/TNFAIP3/NR4A3/IL18RAP/RIPK3/SMPD3	16
BP	GO:0032885	regulation of polysaccharide biosynthetic process	7/880	37/18670	0.00150351	0.0203251	0.0176287	GCK/IGF1/IGF2/IRS1/SMPD3/PPP1R3B/PPP1R3G	7
BP	GO:0045621	positive regulation of lymphocyte differentiation	12/880	94/18670	0.00152024	0.0204932	0.0177746	RUNX3/CD80/EGR3/NCKAP1L/IL7R/IL12B/PTPRC/ZAP70/TOX/TESPA1/FOXP3/SASH3	12
BP	GO:0002544	chronic inflammatory response	5/880	19/18670	0.00153834	0.0205629	0.017835	IL10/CCL5/TNFAIP3/CXCL13/FOXP3	5
BP	GO:0046641	positive regulation of alpha-beta T cell proliferation	5/880	19/18670	0.00153834	0.0205629	0.017835	CD3E/IL12B/PTPRC/ZAP70/CCR2	5
BP	GO:0070989	oxidative demethylation	5/880	19/18670	0.00153834	0.0205629	0.017835	CYP1A2/CYP2C8/CYP2D6/CYP3A4/TET2	5
BP	GO:0010517	regulation of phospholipase activity	10/880	70/18670	0.00156553	0.0208679	0.0180995	ANG/ESR1/FGF2/ITK/CCL5/SELE/TXK/GPR55/P2RY12/ANXA8	10
BP	GO:0010518	positive regulation of phospholipase activity	9/880	59/18670	0.00166252	0.0216769	0.0188013	ANG/ESR1/FGF2/ITK/CCL5/SELE/TXK/GPR55/P2RY12	9
BP	GO:0032732	positive regulation of interleukin-1 production	9/880	59/18670	0.00166252	0.0216769	0.0188013	IGHD/ORM1/ORM2/SAA1/CCL3/TLR8/CLEC7A/PYHIN1/USP50	9
BP	GO:0042130	negative regulation of T cell proliferation	9/880	59/18670	0.00166252	0.0216769	0.0188013	BMP4/CD80/IL10/SPN/LILRB1/PLA2G2D/CD274/FOXP3/CLEC4G	9
BP	GO:0042730	fibrinolysis	6/880	28/18670	0.00166437	0.0216769	0.0188013	FGA/GP1BA/KLKB1/KRT1/PLG/THBD	6
BP	GO:2000108	positive regulation of leukocyte apoptotic process	6/880	28/18670	0.00166437	0.0216769	0.0188013	IL10/PIK3CD/CCL5/NR4A3/CD274/HCAR2	6
BP	GO:0002711	positive regulation of T cell mediated immunity	8/880	48/18670	0.00166465	0.0216769	0.0188013	B2M/CD1D/IL1R1/IL12B/PTPRC/FOXP3/SASH3/RSAD2	8
BP	GO:0010107	potassium ion import	8/880	48/18670	0.00166465	0.0216769	0.0188013	ATP1A3/HCN2/KCNJ1/KCNJ5/KCNJ6/KCNJ8/KCNJ10/SLC12A1	8
BP	GO:0042100	B cell proliferation	12/880	95/18670	0.00166711	0.0216769	0.0188013	MS4A1/CD38/CD79A/NCKAP1L/IL7R/IL10/PTPRC/IKZF3/MZB1/SASH3/FCRL3/TNFRSF13C	12
BP	GO:0045069	regulation of viral genome replication	12/880	95/18670	0.00166711	0.0216769	0.0188013	IFI27/IFIT1/LTF/MX1/OAS1/OAS3/PROX1/CCL5/CCL8/ISG15/RSAD2/APOBEC3A	12
BP	GO:0046916	cellular transition metal ion homeostasis	13/880	108/18670	0.00169924	0.0220347	0.0191116	GDF2/HPX/LCK/LTF/MT1E/MT1F/MT1G/MT1H/MT1M/MT1X/MT2A/SLC30A2/HAMP	13
BP	GO:0045582	positive regulation of T cell differentiation	11/880	83/18670	0.00173741	0.0224686	0.0194879	RUNX3/CD80/EGR3/NCKAP1L/IL7R/IL12B/PTPRC/ZAP70/TESPA1/FOXP3/SASH3	11
BP	GO:0042531	positive regulation of tyrosine phosphorylation of STAT protein	10/880	71/18670	0.00174679	0.0225289	0.0195402	CTF1/FYN/GHR/HPX/IGF1/IL6ST/IL12B/CCL5/SOCS3/IL24	10
BP	GO:0050921	positive regulation of chemotaxis	15/880	135/18670	0.00176262	0.0226342	0.0196315	CCR4/CCR7/FGF2/FPR2/NCKAP1L/RAC2/CCL3/CCL4/CCL5/CXCL12/FGF18/CXCL14/CXCL13/P2RY12/CCR2	15
BP	GO:0001818	negative regulation of cytokine production	26/880	296/18670	0.00176667	0.0226342	0.0196315	GBP1/GPR18/NCKAP1L/IGF1/IL10/IL12B/LTF/ORM1/PTPRC/SLAMF1/TNFAIP3/CD84/IL1RL1/ISG15/HDAC9/MERTK/LILRB1/PTPN22/CD274/TBX21/FOXP3/HERC5/TLR8/BANK1/C1QTNF3/TIGIT	26
BP	GO:0050716	positive regulation of interleukin-1 secretion	7/880	38/18670	0.00176918	0.0226342	0.0196315	IGHD/ORM1/ORM2/SAA1/CCL3/TLR8/USP50	7
BP	GO:0052803	imidazole-containing compound metabolic process	4/880	12/18670	0.00179037	0.022844	0.0198135	HDC/MTHFD1/FTCD/MTHFD2L	4
BP	GO:0050731	positive regulation of peptidyl-tyrosine phosphorylation	19/880	192/18670	0.00186333	0.0237115	0.0205659	AREG/CD3E/CD80/CTF1/FYN/GHR/HPX/IGF1/IGF2/IL6ST/IL12B/PTPRC/CCL5/TAL1/SOCS3/IL24/STAP1/BANK1/CASS4	19
BP	GO:0001913	T cell mediated cytotoxicity	8/880	49/18670	0.00190874	0.0241604	0.0209553	B2M/CD1D/IL7R/IL12B/PRF1/PTPRC/LILRB1/RIPK3	8
BP	GO:0002686	negative regulation of leukocyte migration	8/880	49/18670	0.00190874	0.0241604	0.0209553	C5/GPR18/CCL2/CXCL12/KLRK1/STAP1/GCSAM/KLRC4-KLRK1	8
BP	GO:0060193	positive regulation of lipase activity	10/880	72/18670	0.00194466	0.0245501	0.0212933	ANG/ESR1/FGF2/ITK/CCL5/SELE/TXK/GPR55/P2RY12/APOA5	10
BP	GO:0019373	epoxygenase P450 pathway	5/880	20/18670	0.00197231	0.0247031	0.021426	CYP1A1/CYP1A2/CYP1B1/CYP2C8/CYP2E1	5
BP	GO:0033630	positive regulation of cell adhesion mediated by integrin	5/880	20/18670	0.00197231	0.0247031	0.021426	CD3E/NCKAP1L/CCL5/CXCL13/P2RY12	5
BP	GO:1903978	regulation of microglial cell activation	5/880	20/18670	0.00197231	0.0247031	0.021426	LDLR/PTPRC/CCL3/CST7/STAP1	5
BP	GO:0043255	regulation of carbohydrate biosynthetic process	12/880	97/18670	0.00199591	0.0249333	0.0216256	FOXO1/GCK/IGF1/IGF2/IRS1/PLEK/CD244/SMPD3/PPP1R3B/C1QTNF3/SIK1/PPP1R3G	12
BP	GO:0005979	regulation of glycogen biosynthetic process	6/880	29/18670	0.00201599	0.0250529	0.0217294	GCK/IGF1/IGF2/IRS1/PPP1R3B/PPP1R3G	6
BP	GO:0010962	regulation of glucan biosynthetic process	6/880	29/18670	0.00201599	0.0250529	0.0217294	GCK/IGF1/IGF2/IRS1/PPP1R3B/PPP1R3G	6
BP	GO:0002287	alpha-beta T cell activation involved in immune response	9/880	61/18670	0.00211018	0.0260201	0.0225682	CD80/IL12B/IRF4/LY9/SPN/EOMES/TBX21/FOXP3/SLAMF6	9
BP	GO:0002293	alpha-beta T cell differentiation involved in immune response	9/880	61/18670	0.00211018	0.0260201	0.0225682	CD80/IL12B/IRF4/LY9/SPN/EOMES/TBX21/FOXP3/SLAMF6	9
BP	GO:0030888	regulation of B cell proliferation	9/880	61/18670	0.00211018	0.0260201	0.0225682	CD38/NCKAP1L/IL10/PTPRC/IKZF3/MZB1/SASH3/FCRL3/TNFRSF13C	9
BP	GO:0050764	regulation of phagocytosis	12/880	98/18670	0.0021792	0.0267331	0.0231867	C4BPA/DOCK2/FPR2/NCKAP1L/IL2RB/MBL2/PTPRC/CCL2/MERTK/STAP1/SIRPG/CLEC7A	12
BP	GO:0050848	regulation of calcium-mediated signaling	12/880	98/18670	0.0021792	0.0267331	0.0231867	CD3E/RCAN1/GBP1/IGF1/PLEK/CCL3/CCL4/ZAP70/TRAT1/TMEM100/SLA2/JSRP1	12
BP	GO:0097696	STAT cascade	17/880	166/18670	0.00219954	0.0269134	0.023343	CTF1/CYP1B1/FYN/GHR/HPX/IGF1/IL6ST/IL7R/IL10/IL12B/PTPRC/CCL2/CCL5/SOCS2/SOCS3/IL24/CCR2	17
BP	GO:0006813	potassium ion transport	22/880	240/18670	0.0022784	0.027807	0.0241181	ATP1A3/HCN2/DRD1/GCK/KCNA3/KCND3/KCNJ1/KCNJ5/KCNJ6/KCNJ8/KCNJ10/KCNMA1/KCNN2/FXYD1/SLC12A1/KCNAB2/KCNAB3/KCNQ5/P2RY12/NETO1/SLC24A4/KCNV2	22
BP	GO:0022408	negative regulation of cell-cell adhesion	18/880	181/18670	0.0022951	0.0279393	0.0242329	BMP4/RUNX3/CD80/IL1RN/IL10/PLG/CXCL12/SPN/TNR/LILRB1/PTPN22/PLA2G2D/CD274/TBX21/FOXP3/LAX1/TIGIT/CLEC4G	18
BP	GO:0050729	positive regulation of inflammatory response	16/880	153/18670	0.00236623	0.0287319	0.0249204	CD6/CCR7/FABP4/IL6ST/IL12B/KLKB1/LDLR/PIK3CG/CCL3/CCL18/IL1RL1/STAP1/CLEC7A/CREB3L3/GBP5/CCR2	16
BP	GO:0050710	negative regulation of cytokine secretion	10/880	74/18670	0.00239458	0.0289543	0.0251132	GBP1/IL10/TNFAIP3/HDAC9/LILRB1/PTPN22/FOXP3/TLR8/BANK1/C1QTNF3	10
BP	GO:0001782	B cell homeostasis	6/880	30/18670	0.00242095	0.0289543	0.0251132	NCKAP1L/TNFAIP3/FOXP3/DOCK10/TNFRSF13C/DOCK11	6
BP	GO:0042759	long-chain fatty acid biosynthetic process	6/880	30/18670	0.00242095	0.0289543	0.0251132	CYP1A1/CYP1A2/CYP2C8/CYP2D6/CYP2E1/CYP3A4	6
BP	GO:0046640	regulation of alpha-beta T cell proliferation	6/880	30/18670	0.00242095	0.0289543	0.0251132	CD3E/IL12B/PTPRC/ZAP70/CD274/CCR2	6
BP	GO:0050690	regulation of defense response to virus by virus	6/880	30/18670	0.00242095	0.0289543	0.0251132	B2M/CD247/CD8B/DOCK2/FYN/LCK	6
BP	GO:0050869	negative regulation of B cell activation	6/880	30/18670	0.00242095	0.0289543	0.0251132	IL10/TNFAIP3/FOXP3/BANK1/SAMSN1/SLA2	6
BP	GO:0002712	regulation of B cell mediated immunity	8/880	51/18670	0.002481	0.0289842	0.0251392	C4BPA/CR1/HPX/IL10/PTPRC/CD226/TBX21/FOXP3	8
BP	GO:0002889	regulation of immunoglobulin mediated immune response	8/880	51/18670	0.002481	0.0289842	0.0251392	C4BPA/CR1/HPX/IL10/PTPRC/CD226/TBX21/FOXP3	8
BP	GO:0019369	arachidonic acid metabolic process	8/880	51/18670	0.002481	0.0289842	0.0251392	CYP1A1/CYP1A2/CYP1B1/CYP2C8/CYP2D6/CYP2E1/CYP2U1/PLA2G4B	8
BP	GO:0001779	natural killer cell differentiation	5/880	21/18670	0.00248933	0.0289842	0.0251392	PRDM1/PIK3CD/PTPRC/TOX/MERTK	5
BP	GO:0010310	regulation of hydrogen peroxide metabolic process	5/880	21/18670	0.00248933	0.0289842	0.0251392	FYN/HP/MMP3/RAC2/DUOXA2	5
BP	GO:0017000	antibiotic biosynthetic process	5/880	21/18670	0.00248933	0.0289842	0.0251392	CYP1A1/CYP1A2/FYN/DUOX2/DUOXA2	5
BP	GO:0035590	purinergic nucleotide receptor signaling pathway	5/880	21/18670	0.00248933	0.0289842	0.0251392	P2RX1/P2RY14/GPR171/P2RY13/P2RY12	5
BP	GO:0035743	CD4-positive, alpha-beta T cell cytokine production	5/880	21/18670	0.00248933	0.0289842	0.0251392	IL1R1/IL12B/IL18RAP/TBX21/RSAD2	5
BP	GO:0035589	G protein-coupled purinergic nucleotide receptor signaling pathway	4/880	13/18670	0.00249026	0.0289842	0.0251392	P2RY14/GPR171/P2RY13/P2RY12	4
BP	GO:0045078	positive regulation of interferon-gamma biosynthetic process	4/880	13/18670	0.00249026	0.0289842	0.0251392	IL12B/TLR8/CLEC7A/TNFRSF13C	4
BP	GO:1902713	regulation of interferon-gamma secretion	4/880	13/18670	0.00249026	0.0289842	0.0251392	CD2/CD160/PTPN22/CD244	4
BP	GO:0051260	protein homooligomerization	29/880	351/18670	0.00249813	0.0290051	0.0251573	ALAD/B2M/C9/CD3E/CD3G/CD247/CD79A/CDA/CTH/GBP1/GCH1/GLUL/KCNA3/KCND3/P2RX1/PRF1/SLC1A1/SLC6A4/SLC22A1/TCL1A/LGI1/RIPK3/ANGPTL4/SMPD3/FSD1/STEAP4/GBP5/KCNV2/USP50	29
BP	GO:0002690	positive regulation of leukocyte chemotaxis	11/880	87/18670	0.00254305	0.0294549	0.0255474	CCR7/FPR2/NCKAP1L/RAC2/CCL3/CCL4/CCL5/CXCL12/CXCL14/CXCL13/CCR2	11
BP	GO:0007200	phospholipase C-activating G protein-coupled receptor signaling pathway	12/880	100/18670	0.00258708	0.0298924	0.0259269	ADRA1B/DRD1/ESR1/FPR2/GPR17/GPR18/GRPR/GPR65/GPR55/GNA14/P2RY12/GPR174	12
BP	GO:0070838	divalent metal ion transport	37/880	483/18670	0.00262011	0.0302009	0.0261944	FASLG/ATP2A3/MS4A1/CCR5/CCR7/DRD1/FGF2/FGF14/FYN/GCK/GNAO1/GPM6A/LCK/CXCL9/P2RX1/PDE4B/PIK3CG/PRKCB/PTPRC/CCL2/CCL3/CCL4/CCL5/CCL8/CXCL12/SLC30A2/CD84/CACNA1I/LILRB1/P2RY12/SLC25A25/FCRL3/SLC24A4/JSRP1/BHLHA15/MCOLN2/PKD1L3	37
BP	GO:1903725	regulation of phospholipid metabolic process	11/880	88/18670	0.00278554	0.0318985	0.0276669	CCR7/FGF2/FPR2/IRS1/LDLR/TEK/SOCS2/SOCS3/PIK3R5/P2RY12/SLA2	11
BP	GO:0050798	activated T cell proliferation	7/880	41/18670	0.00278844	0.0318985	0.0276669	FYN/IGF1/IGF2/IL12B/RIPK3/CD274/FOXP3	7
BP	GO:0150077	regulation of neuroinflammatory response	7/880	41/18670	0.00278844	0.0318985	0.0276669	IGF1/LDLR/MMP3/PTPRC/CCL3/CST7/STAP1	7
BP	GO:0051896	regulation of protein kinase B signaling	22/880	244/18670	0.00279413	0.0318985	0.0276669	AREG/CD80/CHI3L1/CCR7/ESR1/FGF2/FYN/IGF2/IRS1/LCK/PIK3CD/PIK3CG/PKHD1/RAC2/CCL3/TEK/FGF18/PIK3R5/ICOS/TRAT1/BANK1/P2RY12	22
BP	GO:0032653	regulation of interleukin-10 production	8/880	52/18670	0.00281337	0.0320415	0.0277909	IL12B/IRF4/LILRB1/CD274/FOXP3/SASH3/CLEC7A/TIGIT	8
BP	GO:0007259	JAK-STAT cascade	16/880	156/18670	0.00288001	0.0326137	0.0282871	CTF1/CYP1B1/FYN/GHR/HPX/IGF1/IL6ST/IL10/IL12B/PTPRC/CCL2/CCL5/SOCS2/SOCS3/IL24/CCR2	16
BP	GO:0007202	activation of phospholipase C activity	6/880	31/18670	0.00288411	0.0326137	0.0282871	ANG/ITK/SELE/TXK/GPR55/P2RY12	6
BP	GO:0051482	positive regulation of cytosolic calcium ion concentration involved in phospholipase C-activating G protein-coupled signaling pathway	6/880	31/18670	0.00288411	0.0326137	0.0282871	DRD1/GPR17/GPR18/GPR65/GPR55/GPR174	6
BP	GO:1903708	positive regulation of hemopoiesis	18/880	185/18670	0.00291222	0.0328537	0.0284953	RUNX3/CD80/EGR3/EVI2B/FOXC1/NCKAP1L/IL7R/IL12B/PTPRC/TAL1/KLF10/ZAP70/ISG15/TOX/TESPA1/FOXP3/SASH3/SLC9B2	18
BP	GO:0006925	inflammatory cell apoptotic process	5/880	22/18670	0.00309803	0.0347854	0.0301708	FASLG/CCR5/PIK3CD/CCL5/HCAR2	5
BP	GO:0033622	integrin activation	5/880	22/18670	0.00309803	0.0347854	0.0301708	PLEK/CXCL12/CXCL13/MZB1/P2RY12	5
BP	GO:0050702	interleukin-1 beta secretion	8/880	53/18670	0.00317945	0.0356158	0.030891	CCR7/ORM1/ORM2/CCL3/TNFAIP3/TLR8/GBP5/USP50	8
BP	GO:0072511	divalent inorganic cation transport	37/880	489/18670	0.00321926	0.0359773	0.0312046	FASLG/ATP2A3/MS4A1/CCR5/CCR7/DRD1/FGF2/FGF14/FYN/GCK/GNAO1/GPM6A/LCK/CXCL9/P2RX1/PDE4B/PIK3CG/PRKCB/PTPRC/CCL2/CCL3/CCL4/CCL5/CCL8/CXCL12/SLC30A2/CD84/CACNA1I/LILRB1/P2RY12/SLC25A25/FCRL3/SLC24A4/JSRP1/BHLHA15/MCOLN2/PKD1L3	37
BP	GO:1902107	positive regulation of leukocyte differentiation	15/880	144/18670	0.00331112	0.0369174	0.03202	RUNX3/CD80/EGR3/EVI2B/NCKAP1L/IL7R/IL12B/PTPRC/KLF10/ZAP70/TOX/TESPA1/FOXP3/SASH3/SLC9B2	15
BP	GO:0042475	odontogenesis of dentin-containing tooth	11/880	90/18670	0.00332639	0.0370012	0.0320926	AMBN/BMP4/RUNX2/FOXC1/FOXO1/GNAO1/KLK4/ODAM/SMPD3/BCL11B/SLC24A4	11
BP	GO:0043552	positive regulation of phosphatidylinositol 3-kinase activity	6/880	32/18670	0.00341044	0.037848	0.0328271	CCR7/FGF2/FPR2/IRS1/TEK/P2RY12	6
BP	GO:0002720	positive regulation of cytokine production involved in immune response	8/880	54/18670	0.00358148	0.0396539	0.0343934	B2M/IL1R1/NR4A3/CD226/LILRB1/CD160/SASH3/RSAD2	8
BP	GO:0046626	regulation of insulin receptor signaling pathway	9/880	66/18670	0.00365507	0.0403749	0.0350188	IGF2/IRS1/PRKCB/PRKCQ/SORL1/SOCS2/SOCS3/MZB1/SLA2	9
BP	GO:0032881	regulation of polysaccharide metabolic process	7/880	43/18670	0.00368412	0.0405083	0.0351345	GCK/IGF1/IGF2/IRS1/SMPD3/PPP1R3B/PPP1R3G	7
BP	GO:0042088	T-helper 1 type immune response	7/880	43/18670	0.00368412	0.0405083	0.0351345	CD80/IL1R1/IL12B/SPN/IL18RAP/IL1RL1/CCR2	7
BP	GO:1904892	regulation of STAT cascade	15/880	146/18670	0.00377503	0.0414125	0.0359187	CTF1/CYP1B1/FYN/GHR/HPX/IGF1/IL6ST/IL7R/IL10/IL12B/PTPRC/CCL5/SOCS2/SOCS3/IL24	15
BP	GO:0032703	negative regulation of interleukin-2 production	5/880	23/18670	0.00380709	0.0415731	0.036058	GBP1/PTPRC/TNFAIP3/TBX21/FOXP3	5
BP	GO:0032753	positive regulation of interleukin-4 production	5/880	23/18670	0.00380709	0.0415731	0.036058	CD3E/IRF4/PRKCQ/FOXP3/SASH3	5
BP	GO:0051047	positive regulation of secretion	33/880	428/18670	0.00392835	0.0427993	0.0371215	ANG/BLK/C5/CD2/CD38/FGA/GCK/GLUL/IGF1/IGHD/IL10/ORM1/ORM2/SAA1/CCL3/CXCL12/SLC6A4/CACNA1I/IL1RL1/RAB3D/CD160/EXPH5/PTPN22/CD274/TLR8/CD244/SMPD3/CRTAM/C1QTNF3/C1QTNF4/CLEC9A/HCAR2/USP50	33
BP	GO:0032633	interleukin-4 production	6/880	33/18670	0.004005	0.043436	0.0376738	CD3E/IRF4/ITK/PRKCQ/FOXP3/SASH3	6
BP	GO:0061036	positive regulation of cartilage development	6/880	33/18670	0.004005	0.043436	0.0376738	BMP4/RUNX2/GDF2/SMAD1/FGF18/GDF6	6
BP	GO:0050679	positive regulation of epithelial cell proliferation	19/880	206/18670	0.0040995	0.0443602	0.0384753	ANG/AR/AREG/BMP4/EGR3/FGF2/GDF2/GLUL/IGF1/IL10/ITGA4/PROX1/CCL5/CXCL12/TEK/TNFAIP3/NR4A3/PPP1R16B/ODAM	19
BP	GO:0061756	leukocyte adhesion to vascular endothelial cell	7/880	44/18670	0.00420649	0.0454148	0.0393901	ADD2/ITGA4/ITGB7/CXCL12/SELE/SPN/CCR2	7
BP	GO:0002467	germinal center formation	4/880	15/18670	0.00440921	0.0470711	0.0408266	TNFAIP3/CXCL13/KLHL6/TNFRSF13C	4
BP	GO:0015671	oxygen transport	4/880	15/18670	0.00440921	0.0470711	0.0408266	HBA1/HBA2/HBB/IPCEF1	4
BP	GO:0090494	dopamine uptake	4/880	15/18670	0.00440921	0.0470711	0.0408266	DRD1/SLC6A2/SLC22A1/SLC22A3	4
BP	GO:2000402	negative regulation of lymphocyte migration	4/880	15/18670	0.00440921	0.0470711	0.0408266	CCL2/KLRK1/GCSAM/KLRC4-KLRK1	4
BP	GO:2001185	regulation of CD8-positive, alpha-beta T cell activation	4/880	15/18670	0.00440921	0.0470711	0.0408266	RUNX3/NCKAP1L/LILRB1/CD274	4
BP	GO:0002292	T cell differentiation involved in immune response	9/880	68/18670	0.00447712	0.0475832	0.0412708	CD80/IL12B/IRF4/LY9/SPN/EOMES/TBX21/FOXP3/SLAMF6	9
BP	GO:0033627	cell adhesion mediated by integrin	9/880	68/18670	0.00447712	0.0475832	0.0412708	CD3E/CYP1B1/NCKAP1L/ITGA4/ITGB7/PIK3CG/CCL5/CXCL13/P2RY12	9
BP	GO:0002407	dendritic cell chemotaxis	5/880	24/18670	0.00462515	0.0490471	0.0425405	CCR5/CCR7/PIK3CG/CCL5/CCR2	5
BP	GO:0032660	regulation of interleukin-17 production	6/880	34/18670	0.00467286	0.0492249	0.0426947	NCKAP1L/IL12B/LY9/PRKCQ/FOXP3/SLAMF6	6
BP	GO:0042533	tumor necrosis factor biosynthetic process	6/880	34/18670	0.00467286	0.0492249	0.0426947	TNFRSF8/IL10/SPN/LILRB1/CLEC7A/CCR2	6
BP	GO:0042534	regulation of tumor necrosis factor biosynthetic process	6/880	34/18670	0.00467286	0.0492249	0.0426947	TNFRSF8/IL10/SPN/LILRB1/CLEC7A/CCR2	6
BP	GO:0015696	ammonium transport	12/880	108/18670	0.00488283	0.0513235	0.0445149	DRD1/P2RX1/RHCE/RHD/CXCL12/SLC6A2/SLC6A4/SLC22A1/SLC22A3/CHRNA6/LILRB1/SLC38A2	12
BP	GO:0051222	positive regulation of protein transport	32/880	418/18670	0.00496277	0.0520115	0.0451117	ANG/BLK/C5/CD2/CD38/FGA/FYN/GCK/GLUL/IGF1/IGHD/IL10/ORM1/ORM2/RAC2/SAA1/CCL3/SORL1/IL1RL1/TENM1/CD160/EXPH5/PTPN22/CD274/TLR8/CD244/CRTAM/C1QTNF3/C1QTNF4/CLEC9A/HCAR2/USP50	32
BP	GO:1903409	reactive oxygen species biosynthetic process	13/880	122/18670	0.00497008	0.0520115	0.0451117	CYP1A1/CYP1A2/CYP1B1/FYN/GCH1/HBB/IL10/KLRK1/DUOX2/CLEC7A/AGXT2/DUOXA2/KLRC4-KLRK1	13
BP	GO:0007596	blood coagulation	27/880	336/18670	0.00501304	0.0523463	0.045402	FGA/FYN/GP1BA/GP5/HBB/KLKB1/KRT1/LCK/P2RX1/PIK3CG/PLG/PLEK/PRKAR2B/PRKCB/PRKCQ/SAA1/THBD/GNA14/TSPAN32/MERTK/HPS5/PIK3R5/CLEC1B/P2RY12/DOCK8/DOCK11/ANXA8	27
BP	GO:0001676	long-chain fatty acid metabolic process	12/880	109/18670	0.00525826	0.0547869	0.0475189	CYP1A1/CYP1A2/CYP1B1/CYP2C8/CYP2D6/CYP2E1/CYP3A4/ACSL1/SLC27A2/ACSL5/CYP2U1/PLA2G4B	12
BP	GO:0046425	regulation of JAK-STAT cascade	14/880	137/18670	0.00528605	0.0549565	0.047666	CTF1/CYP1B1/FYN/GHR/HPX/IGF1/IL6ST/IL10/IL12B/PTPRC/CCL5/SOCS2/SOCS3/IL24	14
BP	GO:0001504	neurotransmitter uptake	7/880	46/18670	0.00541701	0.0556132	0.0482356	DRD1/GLUL/KCNJ10/SLC1A1/SLC6A2/SLC6A4/SLC22A3	7
BP	GO:0005978	glycogen biosynthetic process	7/880	46/18670	0.00541701	0.0556132	0.0482356	GCK/IGF1/IGF2/IRS1/UGP2/PPP1R3B/PPP1R3G	7
BP	GO:0009250	glucan biosynthetic process	7/880	46/18670	0.00541701	0.0556132	0.0482356	GCK/IGF1/IGF2/IRS1/UGP2/PPP1R3B/PPP1R3G	7
BP	GO:0033628	regulation of cell adhesion mediated by integrin	7/880	46/18670	0.00541701	0.0556132	0.0482356	CD3E/CYP1B1/NCKAP1L/PIK3CG/CCL5/CXCL13/P2RY12	7
BP	GO:0050706	regulation of interleukin-1 beta secretion	7/880	46/18670	0.00541701	0.0556132	0.0482356	CCR7/ORM1/ORM2/CCL3/TNFAIP3/TLR8/USP50	7
BP	GO:0070873	regulation of glycogen metabolic process	6/880	35/18670	0.00541915	0.0556132	0.0482356	GCK/IGF1/IGF2/IRS1/PPP1R3B/PPP1R3G	6
BP	GO:0032720	negative regulation of tumor necrosis factor production	9/880	70/18670	0.0054364	0.0556706	0.0482854	GPR18/IGF1/IL10/ORM1/SLAMF1/TNFAIP3/LILRB1/PTPN22/FOXP3	9
BP	GO:0042509	regulation of tyrosine phosphorylation of STAT protein	10/880	83/18670	0.00555211	0.0567007	0.0491788	CTF1/FYN/GHR/HPX/IGF1/IL6ST/IL12B/CCL5/SOCS3/IL24	10
BP	GO:0009404	toxin metabolic process	5/880	25/18670	0.00556075	0.0567007	0.0491788	CTH/CYP1A1/CYP1A2/CYP1B1/FMO2	5
BP	GO:0017001	antibiotic catabolic process	8/880	58/18670	0.00559554	0.0568126	0.0492758	ADH4/HBA1/HBA2/HBB/HP/SULT2A1/SULT1B1/DUOX2	8
BP	GO:0042093	T-helper cell differentiation	8/880	58/18670	0.00559554	0.0568126	0.0492758	CD80/IL12B/IRF4/LY9/SPN/TBX21/FOXP3/SLAMF6	8
BP	GO:0001946	lymphangiogenesis	4/880	16/18670	0.00566224	0.0571252	0.049547	FOXC1/PROX1/CCBE1/PROX2	4
BP	GO:0033631	cell-cell adhesion mediated by integrin	4/880	16/18670	0.00566224	0.0571252	0.049547	CD3E/ITGA4/CCL5/CXCL13	4
BP	GO:0090493	catecholamine uptake	4/880	16/18670	0.00566224	0.0571252	0.049547	DRD1/SLC6A2/SLC22A1/SLC22A3	4
BP	GO:1904019	epithelial cell apoptotic process	12/880	111/18670	0.00607789	0.0611147	0.0530072	FASLG/COL4A3/FGA/IL10/ITGA4/MAP3K5/PIK3CG/CCL2/TEK/TNFAIP3/CD160/ANGPTL4	12
BP	GO:0007599	hemostasis	27/880	341/18670	0.0060833	0.0611147	0.0530072	FGA/FYN/GP1BA/GP5/HBB/KLKB1/KRT1/LCK/P2RX1/PIK3CG/PLG/PLEK/PRKAR2B/PRKCB/PRKCQ/SAA1/THBD/GNA14/TSPAN32/MERTK/HPS5/PIK3R5/CLEC1B/P2RY12/DOCK8/DOCK11/ANXA8	27
BP	GO:0046638	positive regulation of alpha-beta T cell differentiation	7/880	47/18670	0.00611195	0.0612735	0.053145	RUNX3/CD80/NCKAP1L/IL12B/ZAP70/FOXP3/SASH3	7
BP	GO:0016051	carbohydrate biosynthetic process	19/880	214/18670	0.00616065	0.0616323	0.0534562	ALDOB/ATF3/ENO3/FOXO1/G6PC/GCK/IGF1/IGF2/IRS1/PLEK/UGP2/NDST3/CD244/SMPD3/PPP1R3B/C1QTNF3/SIK1/ST8SIA6/PPP1R3G	19
BP	GO:0070527	platelet aggregation	8/880	59/18670	0.00621248	0.0618675	0.0536602	FGA/GP1BA/HBB/PIK3CG/PLEK/PRKCQ/TSPAN32/P2RY12	8
BP	GO:2000351	regulation of endothelial cell apoptotic process	8/880	59/18670	0.00621248	0.0618675	0.0536602	FASLG/FGA/ITGA4/CCL2/TEK/TNFAIP3/CD160/ANGPTL4	8
BP	GO:0032733	positive regulation of interleukin-10 production	6/880	36/18670	0.00624898	0.0618675	0.0536602	IL12B/IRF4/CD274/SASH3/CLEC7A/TIGIT	6
BP	GO:0046627	negative regulation of insulin receptor signaling pathway	6/880	36/18670	0.00624898	0.0618675	0.0536602	IRS1/PRKCB/PRKCQ/SOCS2/SOCS3/SLA2	6
BP	GO:0090218	positive regulation of lipid kinase activity	6/880	36/18670	0.00624898	0.0618675	0.0536602	CCR7/FGF2/FPR2/IRS1/TEK/P2RY12	6
BP	GO:0050728	negative regulation of inflammatory response	16/880	169/18670	0.00628463	0.0620916	0.0538546	CNR2/FPR2/GPR17/IGF1/IL10/IL12B/KRT1/LDLR/PTPRC/SAA1/TEK/TNFAIP3/CST7/SOCS3/FOXP3/C1QTNF3	16
BP	GO:0050817	coagulation	27/880	342/18670	0.00631866	0.0622988	0.0540343	FGA/FYN/GP1BA/GP5/HBB/KLKB1/KRT1/LCK/P2RX1/PIK3CG/PLG/PLEK/PRKAR2B/PRKCB/PRKCQ/SAA1/THBD/GNA14/TSPAN32/MERTK/HPS5/PIK3R5/CLEC1B/P2RY12/DOCK8/DOCK11/ANXA8	27
BP	GO:0001774	microglial cell activation	7/880	48/18670	0.00687124	0.0672742	0.0583496	FPR2/LDLR/PTPRC/CCL3/CST7/STAP1/TLR8	7
BP	GO:0002269	leukocyte activation involved in inflammatory response	7/880	48/18670	0.00687124	0.0672742	0.0583496	FPR2/LDLR/PTPRC/CCL3/CST7/STAP1/TLR8	7
BP	GO:0002294	CD4-positive, alpha-beta T cell differentiation involved in immune response	8/880	60/18670	0.00687968	0.0672742	0.0583496	CD80/IL12B/IRF4/LY9/SPN/TBX21/FOXP3/SLAMF6	8
BP	GO:0045576	mast cell activation	8/880	60/18670	0.00687968	0.0672742	0.0583496	RHOH/CNR2/PIK3CD/PIK3CG/RAC2/NR4A3/CD84/CD226	8
BP	GO:0000302	response to reactive oxygen species	20/880	232/18670	0.00693763	0.0677022	0.0587208	AREG/CCR7/CYP1B1/CYP2E1/FOXO1/FYN/GCH1/GNAO1/HBA1/HBA2/HBB/HP/IL10/MAP3K5/MMP3/TNFAIP3/NR4A3/IL18RAP/RIPK3/SMPD3	20
BP	GO:0044242	cellular lipid catabolic process	19/880	217/18670	0.00712422	0.0677289	0.058744	CYP1B1/CYP26A1/ETFDH/FABP4/IRS1/LDLR/PIK3CG/SORL1/LIPG/ACAA2/SLC27A2/AMACR/HAO1/SMPD3/BCO2/ABHD1/APOA5/ACER1/PLA2G4B	19
BP	GO:0060348	bone development	19/880	217/18670	0.00712422	0.0677289	0.058744	ALPL/BMP4/RUNX2/FOXC1/IGF1/LTF/SMAD1/MBL2/PTPRC/TAL1/TEK/FGF18/LILRB1/SMPD3/SLC9B2/AMER1/PHOSPHO1/RANBP3L/TIFAB	19
BP	GO:0071804	cellular potassium ion transport	19/880	217/18670	0.00712422	0.0677289	0.058744	ATP1A3/HCN2/KCNA3/KCND3/KCNJ1/KCNJ5/KCNJ6/KCNJ8/KCNJ10/KCNMA1/KCNN2/SLC12A1/KCNAB2/KCNAB3/KCNQ5/P2RY12/NETO1/SLC24A4/KCNV2	19
BP	GO:0071805	potassium ion transmembrane transport	19/880	217/18670	0.00712422	0.0677289	0.058744	ATP1A3/HCN2/KCNA3/KCND3/KCNJ1/KCNJ5/KCNJ6/KCNJ8/KCNJ10/KCNMA1/KCNN2/SLC12A1/KCNAB2/KCNAB3/KCNQ5/P2RY12/NETO1/SLC24A4/KCNV2	19
BP	GO:0007260	tyrosine phosphorylation of STAT protein	10/880	86/18670	0.00712728	0.0677289	0.058744	CTF1/FYN/GHR/HPX/IGF1/IL6ST/IL12B/CCL5/SOCS3/IL24	10
BP	GO:0000097	sulfur amino acid biosynthetic process	4/880	17/18670	0.007132	0.0677289	0.058744	CDO1/CTH/MTHFD1/MTHFD2L	4
BP	GO:0032740	positive regulation of interleukin-17 production	4/880	17/18670	0.007132	0.0677289	0.058744	IL12B/LY9/PRKCQ/SLAMF6	4
BP	GO:0060263	regulation of respiratory burst	4/880	17/18670	0.007132	0.0677289	0.058744	IGHA1/IGHA2/RAC2/CLEC7A	4
BP	GO:1903975	regulation of glial cell migration	4/880	17/18670	0.007132	0.0677289	0.058744	CCL3/STAP1/P2RY12/CCR2	4
BP	GO:0032945	negative regulation of mononuclear cell proliferation	9/880	73/18670	0.00716426	0.0677289	0.058744	BMP4/CD80/IL10/SPN/LILRB1/PLA2G2D/CD274/FOXP3/CLEC4G	9
BP	GO:0050672	negative regulation of lymphocyte proliferation	9/880	73/18670	0.00716426	0.0677289	0.058744	BMP4/CD80/IL10/SPN/LILRB1/PLA2G2D/CD274/FOXP3/CLEC4G	9
BP	GO:0060350	endochondral bone morphogenesis	9/880	73/18670	0.00716426	0.0677289	0.058744	ALPL/BMP4/RUNX2/FOXC1/MBL2/TEK/FGF18/SMPD3/PHOSPHO1	9
BP	GO:0038083	peptidyl-tyrosine autophosphorylation	6/880	37/18670	0.00716746	0.0677289	0.058744	BLK/FYN/ITK/LCK/SLA/TXK	6
BP	GO:0043029	T cell homeostasis	6/880	37/18670	0.00716746	0.0677289	0.058744	TSC22D3/NCKAP1L/RIPK3/SIT1/FOXP3/GPR174	6
BP	GO:0045730	respiratory burst	6/880	37/18670	0.00716746	0.0677289	0.058744	IGHA1/IGHA2/PIK3CD/PIK3CG/RAC2/CLEC7A	6
BP	GO:0046006	regulation of activated T cell proliferation	6/880	37/18670	0.00716746	0.0677289	0.058744	IGF1/IGF2/IL12B/RIPK3/CD274/FOXP3	6
BP	GO:0002825	regulation of T-helper 1 type immune response	5/880	27/18670	0.00781797	0.0732145	0.0635018	CD80/IL1R1/IL12B/IL1RL1/CCR2	5
BP	GO:0032673	regulation of interleukin-4 production	5/880	27/18670	0.00781797	0.0732145	0.0635018	CD3E/IRF4/PRKCQ/FOXP3/SASH3	5
BP	GO:0001895	retina homeostasis	9/880	74/18670	0.00782468	0.0732145	0.0635018	ALB/B2M/IGHA1/IGHA2/IGHG3/IGKC/KRT1/LTF/RP1L1	9
BP	GO:0005977	glycogen metabolic process	9/880	74/18670	0.00782468	0.0732145	0.0635018	G6PC/GCK/IGF1/IGF2/IL6ST/IRS1/UGP2/PPP1R3B/PPP1R3G	9
BP	GO:1900076	regulation of cellular response to insulin stimulus	9/880	74/18670	0.00782468	0.0732145	0.0635018	IGF2/IRS1/PRKCB/PRKCQ/SORL1/SOCS2/SOCS3/MZB1/SLA2	9
BP	GO:0032611	interleukin-1 beta production	11/880	101/18670	0.00798085	0.0745296	0.0646425	CCR7/IGF1/ORM1/ORM2/CCL3/TNFAIP3/TLR8/CLEC7A/GBP5/PYHIN1/USP50	11
BP	GO:0032620	interleukin-17 production	6/880	38/18670	0.00817963	0.0759401	0.0658659	NCKAP1L/IL12B/LY9/PRKCQ/FOXP3/SLAMF6	6
BP	GO:0048246	macrophage chemotaxis	6/880	38/18670	0.00817963	0.0759401	0.0658659	C5/SAA1/CCL2/CCL3/CCL5/STAP1	6
BP	GO:1900077	negative regulation of cellular response to insulin stimulus	6/880	38/18670	0.00817963	0.0759401	0.0658659	IRS1/PRKCB/PRKCQ/SOCS2/SOCS3/SLA2	6
BP	GO:0070372	regulation of ERK1 and ERK2 cascade	24/880	300/18670	0.00827084	0.0766377	0.066471	ATF3/BMP4/CHI3L1/CCR7/FGA/FGF2/FPR2/GBP1/PKHD1/PTPRC/CCL2/CCL3/CCL4/CCL5/CCL8/CCL18/SLAMF1/TEK/MARCO/FGF18/GPR55/PTPN22/SCIMP/CCL4L1	24
BP	GO:0072593	reactive oxygen species metabolic process	23/880	284/18670	0.00834347	0.0771609	0.0669248	CYP1A1/CYP1A2/CYP1B1/FOXO1/FPR2/FYN/IFI6/GCH1/HBA1/HBA2/HBB/HP/IL10/MMP3/RAC2/RIPK3/KLRK1/DUOX2/CLEC7A/AGXT2/BCO2/DUOXA2/KLRC4-KLRK1	23
BP	GO:0070371	ERK1 and ERK2 cascade	25/880	317/18670	0.00848536	0.0782834	0.0678984	ATF3/BMP4/CHI3L1/CCR7/FGA/FGF2/FPR2/GBP1/IGF1/PKHD1/PTPRC/CCL2/CCL3/CCL4/CCL5/CCL8/CCL18/SLAMF1/TEK/MARCO/FGF18/GPR55/PTPN22/SCIMP/CCL4L1	25
BP	GO:0006073	cellular glucan metabolic process	9/880	75/18670	0.00853047	0.0782834	0.0678984	G6PC/GCK/IGF1/IGF2/IL6ST/IRS1/UGP2/PPP1R3B/PPP1R3G	9
BP	GO:0044042	glucan metabolic process	9/880	75/18670	0.00853047	0.0782834	0.0678984	G6PC/GCK/IGF1/IGF2/IL6ST/IRS1/UGP2/PPP1R3B/PPP1R3G	9
BP	GO:0150076	neuroinflammatory response	9/880	75/18670	0.00853047	0.0782834	0.0678984	FPR2/IGF1/LDLR/MMP3/PTPRC/CCL3/CST7/STAP1/TLR8	9
BP	GO:0007194	negative regulation of adenylate cyclase activity	4/880	18/18670	0.0088329	0.0801342	0.0695036	AKAP5/GABBR2/P2RY13/CCR2	4
BP	GO:0032693	negative regulation of interleukin-10 production	4/880	18/18670	0.0088329	0.0801342	0.0695036	IL12B/LILRB1/CD274/FOXP3	4
BP	GO:0060749	mammary gland alveolus development	4/880	18/18670	0.0088329	0.0801342	0.0695036	AR/AREG/ESR1/SOCS2	4
BP	GO:0061377	mammary gland lobule development	4/880	18/18670	0.0088329	0.0801342	0.0695036	AR/AREG/ESR1/SOCS2	4
BP	GO:0090026	positive regulation of monocyte chemotaxis	4/880	18/18670	0.0088329	0.0801342	0.0695036	FPR2/CCL5/CXCL12/CCR2	4
BP	GO:0150079	negative regulation of neuroinflammatory response	4/880	18/18670	0.0088329	0.0801342	0.0695036	IGF1/LDLR/PTPRC/CST7	4
BP	GO:0044706	multi-multicellular organism process	19/880	222/18670	0.00899952	0.0814909	0.0706804	AR/PRDM1/CD38/COMT/CRHBP/CYP1A1/DHODH/ESR1/FOSB/P2RX1/PNOC/PSG9/PZP/SLC6A4/THBD/CORIN/SLC38A2/NRK/PLA2G4B	19
BP	GO:0002691	regulation of cellular extravasation	5/880	28/18670	0.00915571	0.0822807	0.0713653	IL1R1/ITGA4/CXCL12/RIPK3/CCR2	5
BP	GO:0034368	protein-lipid complex remodeling	5/880	28/18670	0.00915571	0.0822807	0.0713653	ALB/LCAT/LPA/LIPG/APOA5	5
BP	GO:0034369	plasma lipoprotein particle remodeling	5/880	28/18670	0.00915571	0.0822807	0.0713653	ALB/LCAT/LPA/LIPG/APOA5	5
BP	GO:0050858	negative regulation of antigen receptor-mediated signaling pathway	5/880	28/18670	0.00915571	0.0822807	0.0713653	GBP1/CD160/PTPN22/UBASH3A/FCRL3	5
BP	GO:0002637	regulation of immunoglobulin production	8/880	63/18670	0.00920759	0.0825914	0.0716348	HPX/IL10/PTPRC/TBX21/FOXP3/MZB1/SASH3/FCRL3	8
BP	GO:0042476	odontogenesis	13/880	132/18670	0.00951046	0.0851481	0.0738524	ALPL/AMBN/AQP6/BMP4/RUNX2/FOXC1/FOXO1/GNAO1/KLK4/ODAM/SMPD3/BCL11B/SLC24A4	13
BP	GO:0097366	response to bronchodilator	7/880	51/18670	0.00956957	0.0851634	0.0738656	CCR7/CNR2/DRD1/FOXO1/MMP3/NR4A2/HDAC9	7
BP	GO:0015844	monoamine transport	10/880	90/18670	0.00974032	0.0851634	0.0738656	DRD1/P2RX1/CXCL12/SLC6A2/SLC6A4/SLC22A1/SLC22A3/CHRNA6/LILRB1/P2RY12	10
BP	GO:0032651	regulation of interleukin-1 beta production	10/880	90/18670	0.00974032	0.0851634	0.0738656	CCR7/IGF1/ORM1/ORM2/CCL3/TNFAIP3/TLR8/CLEC7A/PYHIN1/USP50	10
BP	GO:0071674	mononuclear cell migration	10/880	90/18670	0.00974032	0.0851634	0.0738656	FPR2/CCL2/CCL3/CCL4/CCL5/CCL8/CCL18/CXCL12/CCL4L1/CCR2	10
BP	GO:0001768	establishment of T cell polarity	3/880	10/18670	0.00976202	0.0851634	0.0738656	CCR7/DOCK2/DOCK8	3
BP	GO:0001820	serotonin secretion	3/880	10/18670	0.00976202	0.0851634	0.0738656	P2RX1/SLC6A4/LILRB1	3
BP	GO:0002713	negative regulation of B cell mediated immunity	3/880	10/18670	0.00976202	0.0851634	0.0738656	C4BPA/CR1/FOXP3	3
BP	GO:0002890	negative regulation of immunoglobulin mediated immune response	3/880	10/18670	0.00976202	0.0851634	0.0738656	C4BPA/CR1/FOXP3	3
BP	GO:0035768	endothelial cell chemotaxis to fibroblast growth factor	3/880	10/18670	0.00976202	0.0851634	0.0738656	FGF2/FGF18/CXCL13	3
BP	GO:0035999	tetrahydrofolate interconversion	3/880	10/18670	0.00976202	0.0851634	0.0738656	MTHFD1/FTCD/MTHFD2L	3
BP	GO:0072610	interleukin-12 secretion	3/880	10/18670	0.00976202	0.0851634	0.0738656	CCR7/LILRB1/TLR8	3
BP	GO:0097048	dendritic cell apoptotic process	3/880	10/18670	0.00976202	0.0851634	0.0738656	CCR7/CXCL12/LILRB1	3
BP	GO:2000544	regulation of endothelial cell chemotaxis to fibroblast growth factor	3/880	10/18670	0.00976202	0.0851634	0.0738656	FGF2/FGF18/CXCL13	3
BP	GO:2000668	regulation of dendritic cell apoptotic process	3/880	10/18670	0.00976202	0.0851634	0.0738656	CCR7/CXCL12/LILRB1	3
BP	GO:0019233	sensory perception of pain	11/880	104/18670	0.00986984	0.0859469	0.0745452	CNR2/COMT/FYN/IL10/IL12B/CCL2/CCL3/CXCL12/MMP24/TMEM100/CCR2	11
BP	GO:1904951	positive regulation of establishment of protein localization	33/880	456/18670	0.00989115	0.0859755	0.07457	ANG/BLK/C5/CD2/CD38/FGA/FYN/GCK/GLUL/GZMB/IGF1/IGHD/IL10/ORM1/ORM2/RAC2/SAA1/CCL3/SORL1/IL1RL1/TENM1/CD160/EXPH5/PTPN22/CD274/TLR8/CD244/CRTAM/C1QTNF3/C1QTNF4/CLEC9A/HCAR2/USP50	33
BP	GO:0050730	regulation of peptidyl-tyrosine phosphorylation	21/880	256/18670	0.00992178	0.086085	0.074665	AREG/CD3E/CD80/CTF1/FYN/GHR/HPX/IGF1/IGF2/IL6ST/IL12B/PTPRC/CCL5/TAL1/SOCS3/SH3BP5/IL24/STAP1/BANK1/CASS4/SAMSN1	21
BP	GO:0045670	regulation of osteoclast differentiation	8/880	64/18670	0.0101006	0.0873192	0.0757355	CAMK4/IL12B/LTF/CCL3/KLF10/GPR55/LILRB1/SLC9B2	8
BP	GO:0050922	negative regulation of chemotaxis	8/880	64/18670	0.0101006	0.0873192	0.0757355	C5/GPR18/CCL2/SEMA3B/CXCL13/KLRK1/STAP1/KLRC4-KLRK1	8
BP	GO:0007162	negative regulation of cell adhesion	23/880	289/18670	0.0101705	0.0877644	0.0761216	BMP4/RUNX3/CD80/CYP1B1/GBP1/IL1RN/IL10/TACSTD2/PLG/PTPRC/CXCL12/SPN/TNR/LILRB1/PTPN22/PLA2G2D/CD274/TBX21/FOXP3/LAX1/PLXNA4/TIGIT/CLEC4G	23
BP	GO:0032731	positive regulation of interleukin-1 beta production	7/880	52/18670	0.0106205	0.0913473	0.0792292	ORM1/ORM2/CCL3/TLR8/CLEC7A/PYHIN1/USP50	7
BP	GO:0034367	protein-containing complex remodeling	5/880	29/18670	0.0106431	0.0913473	0.0792292	ALB/LCAT/LPA/LIPG/APOA5	5
BP	GO:0035025	positive regulation of Rho protein signal transduction	5/880	29/18670	0.0106431	0.0913473	0.0792292	GPR17/GPR18/GPR65/GPR55/GPR174	5
BP	GO:0002726	positive regulation of T cell cytokine production	4/880	19/18670	0.0107781	0.0916812	0.0795188	B2M/IL1R1/SASH3/RSAD2	4
BP	GO:0015669	gas transport	4/880	19/18670	0.0107781	0.0916812	0.0795188	HBA1/HBA2/HBB/IPCEF1	4
BP	GO:0036303	lymph vessel morphogenesis	4/880	19/18670	0.0107781	0.0916812	0.0795188	FOXC1/PROX1/CCBE1/PROX2	4
BP	GO:0046653	tetrahydrofolate metabolic process	4/880	19/18670	0.0107781	0.0916812	0.0795188	GCH1/MTHFD1/FTCD/MTHFD2L	4
BP	GO:0052695	cellular glucuronidation	4/880	19/18670	0.0107781	0.0916812	0.0795188	UGT2B7/UGT2B15/UGT2B17/UGT2A3	4
BP	GO:0000271	polysaccharide biosynthetic process	9/880	78/18670	0.010939	0.0928845	0.0805624	GCK/IGF1/IGF2/IRS1/UGP2/NDST3/SMPD3/PPP1R3B/PPP1R3G	9
BP	GO:2000377	regulation of reactive oxygen species metabolic process	17/880	195/18670	0.0109716	0.0929955	0.0806588	CYP1B1/FOXO1/FPR2/FYN/GCH1/HBB/HP/IL10/MMP3/RAC2/RIPK3/KLRK1/CLEC7A/AGXT2/BCO2/DUOXA2/KLRC4-KLRK1	17
BP	GO:0002698	negative regulation of immune effector process	12/880	120/18670	0.0110914	0.0938213	0.081375	C4BPA/CR1/IL7R/IL10/PTPRC/CD84/LILRB1/TBX21/FOXP3/FCRL3/CLEC4G/CCR2	12
BP	GO:0016054	organic acid catabolic process	22/880	275/18670	0.011128	0.0938213	0.081375	CDO1/CTH/CYP26A1/ETFDH/FGF2/GLUL/GSTZ1/HDC/IRS1/PRODH/SULT2A1/ACAA2/FTCD/SLC27A2/PADI4/AMACR/CSAD/HAO1/STAB2/ALDH8A1/AGXT2/ABHD1	22
BP	GO:0046395	carboxylic acid catabolic process	22/880	275/18670	0.011128	0.0938213	0.081375	CDO1/CTH/CYP26A1/ETFDH/FGF2/GLUL/GSTZ1/HDC/IRS1/PRODH/SULT2A1/ACAA2/FTCD/SLC27A2/PADI4/AMACR/CSAD/HAO1/STAB2/ALDH8A1/AGXT2/ABHD1	22
BP	GO:0001894	tissue homeostasis	19/880	227/18670	0.011253	0.0947076	0.0821437	SERPINA3/ALB/B2M/CD38/FOXC1/IGHA1/IGHA2/IGHG3/IGKC/KRT1/LTF/RAC2/TNFAIP3/GPR55/RAB3D/SASH3/PBLD/RP1L1/CCR2	19
BP	GO:0002285	lymphocyte activation involved in immune response	16/880	181/18670	0.0117931	0.0990789	0.0859351	CD80/IL10/IL12B/IRF4/LY9/PTPRC/SPN/EOMES/ITM2A/LILRB1/TBX21/FOXP3/CD244/DOCK10/SLAMF6/DOCK11	16
BP	GO:0030890	positive regulation of B cell proliferation	6/880	41/18670	0.0118278	0.0991953	0.0860361	CD38/NCKAP1L/PTPRC/SASH3/FCRL3/TNFRSF13C	6
CC	GO:0019814	immunoglobulin complex	94/914	159/19717	7.61303e-84	3.43348e-81	3.30966e-81	CD79A/IGHA1/IGHA2/IGHD/IGHG1/IGHG2/IGHG3/IGHG4/IGHM/IGKC/IGLC2/IGLC3/IGKV1-5/IGHV6-1/IGHV5-51/IGHV4-61/IGHV4-59/IGHV4-39/IGHV4-34/IGHV4-31/IGHV4-28/IGHV4-4/IGHV3-74/IGHV3-73/IGHV3-72/IGHV3-66/IGHV3-64/IGHV3-53/IGHV3-49/IGHV3-48/IGHV3-33/IGHV3-30/IGHV3-23/IGHV3-21/IGHV3-20/IGHV3-15/IGHV3-13/IGHV3-11/IGHV3-7/IGHV2-70/IGHV2-26/IGHV2-5/IGHV1-69-2/IGHV1-69/IGHV1-58/IGHV1-24/IGHV1-18/IGHV1-3/IGLV10-54/…	94
CC	GO:0009897	external side of plasma membrane	107/914	393/19717	9.40481e-53	2.12078e-50	2.04431e-50	FASLG/B2M/CD1D/CD2/CD3E/CD3G/CD5/CD6/CD8A/MS4A1/CD80/CD69/CD79A/CCR4/CCR5/CCR7/CCR8/ACKR2/ENPEP/FGA/GHR/GP1BA/XCR1/CXCR3/IGHA1/IGHA2/IGHD/IGHG1/IGHG2/IGHG3/IGHG4/IGHM/IGKC/IGLC2/IGLC3/IL1R1/IL2RB/IL5RA/IL6ST/IL7R/IL12B/IL12RB2/KCNJ5/KLRD1/LDLR/MAP3K5/CXCL9/P2RX1/PKHD1/PLG/PTPRC/CXCL12/TRGV2/TRGV4/TRGV5/IL1RL1/CXCR6/CD226/LILRB1/KLRK1/IGHV6-1/IGHV5-51/IGHV4-61/IGHV4-59/IGHV4-39/IGHV4-34/IGHV4-31/I…	107
CC	GO:0042571	immunoglobulin complex, circulating	49/914	72/19717	1.76325e-48	2.65075e-46	2.55516e-46	IGHA1/IGHA2/IGHD/IGHG1/IGHG2/IGHG3/IGHG4/IGHM/IGKC/IGLC2/IGLC3/IGHV6-1/IGHV5-51/IGHV4-61/IGHV4-59/IGHV4-39/IGHV4-34/IGHV4-31/IGHV4-28/IGHV4-4/IGHV3-74/IGHV3-73/IGHV3-72/IGHV3-66/IGHV3-64/IGHV3-53/IGHV3-49/IGHV3-48/IGHV3-33/IGHV3-30/IGHV3-23/IGHV3-21/IGHV3-20/IGHV3-15/IGHV3-13/IGHV3-11/IGHV3-7/IGHV2-70/IGHV2-26/IGHV2-5/IGHV1-69-2/IGHV1-69/IGHV1-58/IGHV1-24/IGHV1-18/IGHV1-3/IGLC7/IGKV3-20/IGLL5	49
CC	GO:0042101	T cell receptor complex	44/914	127/19717	5.44283e-27	6.13679e-25	5.91549e-25	CD3E/CD3G/CD247/CD6/CD8A/CD8B/TRAV6/TRGV2/TRGV4/TRGV5/ZAP70/TRBV29-1/TRBV28/TRBV25-1/TRBV20-1/TRBV19/TRBV14/TRBV12-4/TRBV7-6/TRBV6-6/TRBV6-5/TRBV6-1/TRBV5-6/TRBV5-4/TRBV5-1/TRBV4-2/TRBV3-1/TRAV41/TRAV36DV7/TRAV29DV5/TRAV26-1/TRAV21/TRAV19/TRAV14DV4/TRAV13-2/TRAV13-1/TRAV12-3/TRAV9-2/TRAV8-3/TRAV8-1/TRAV4/TRAV2/TRAV1-2/TRAT1	44
CC	GO:0072562	blood microparticle	46/914	147/19717	5.58123e-26	5.03427e-24	4.85273e-24	SERPINA3/AFM/ALB/C4BPA/C8A/C9/CD5L/FCN2/FGA/GC/HBA1/HBA2/HBB/HP/HPX/IGHA1/IGHA2/IGHD/IGHG1/IGHG2/IGHG3/IGHG4/IGHM/IGKC/IGLC2/IGLC3/KRT1/ORM1/ORM2/PLG/PZP/FCN3/CFHR3/IGKV1-5/IGHV3-23/IGHV3-13/IGHV3-7/IGLV3-21/IGLV1-47/IGKV3D-11/IGKV4-1/IGKV3-20/IGKV3-15/IGKV2-30/IGKV1-17/ANGPTL4	46
CC	GO:0098802	plasma membrane receptor complex	58/914	295/19717	4.12461e-21	3.10033e-19	2.98853e-19	B2M/CD3E/CD3G/CD247/CD6/CD8A/CD8B/CD79A/CHRNA1/GRIK3/IL2RB/IL6ST/IRS1/ITGA4/ITGAD/ITGB7/TRAV6/TRGV2/TRGV4/TRGV5/ZAP70/IL18RAP/CHRNA6/GABBR2/TSPAN32/TRBV29-1/TRBV28/TRBV25-1/TRBV20-1/TRBV19/TRBV14/TRBV12-4/TRBV7-6/TRBV6-6/TRBV6-5/TRBV6-1/TRBV5-6/TRBV5-4/TRBV5-1/TRBV4-2/TRBV3-1/TRAV41/TRAV36DV7/TRAV29DV5/TRAV26-1/TRAV21/TRAV19/TRAV14DV4/TRAV13-2/TRAV13-1/TRAV12-3/TRAV9-2/TRAV8-3/TRAV8-1/TRAV4/TRAV2…	58
CC	GO:0071682	endocytic vesicle lumen	7/914	20/19717	2.04874e-05	0.00131998	0.00127238	HBA1/HBA2/HBB/HP/HPX/LTF/SAA1	7
CC	GO:0001772	immunological synapse	9/914	36/19717	2.88524e-05	0.00162656	0.0015679	RHOH/CD3E/CD6/GZMA/GZMB/LCK/PRKCQ/ZAP70/SCIMP	9
CC	GO:0098589	membrane region	30/914	328/19717	0.000321668	0.0155798	0.015018	ADD2/ADRA1B/FASLG/CD2/CD8A/MS4A1/CD79A/FYN/IRS1/KCNA3/KCNMA1/LCK/P2RX1/FXYD1/PRKAR2B/PTPRC/SELE/SLC6A2/SLC6A4/TEK/TNR/ZAP70/AKAP5/CD226/MLC1/P2RY12/BAALC/SPACA1/GLIPR1L1/RGMB	30
CC	GO:0045121	membrane raft	29/914	315/19717	0.000360636	0.0155798	0.015018	ADD2/ADRA1B/FASLG/CD2/CD8A/MS4A1/CD79A/FYN/IRS1/KCNA3/KCNMA1/LCK/P2RX1/FXYD1/PRKAR2B/PTPRC/SELE/SLC6A2/SLC6A4/TEK/TNR/ZAP70/AKAP5/CD226/MLC1/P2RY12/BAALC/GLIPR1L1/RGMB	29
CC	GO:0098857	membrane microdomain	29/914	316/19717	0.000379995	0.0155798	0.015018	ADD2/ADRA1B/FASLG/CD2/CD8A/MS4A1/CD79A/FYN/IRS1/KCNA3/KCNMA1/LCK/P2RX1/FXYD1/PRKAR2B/PTPRC/SELE/SLC6A2/SLC6A4/TEK/TNR/ZAP70/AKAP5/CD226/MLC1/P2RY12/BAALC/GLIPR1L1/RGMB	29
CC	GO:0031838	haptoglobin-hemoglobin complex	4/914	11/19717	0.00116512	0.0410934	0.0396116	HBA1/HBA2/HBB/HP	4
CC	GO:0005942	phosphatidylinositol 3-kinase complex	6/914	27/19717	0.00125004	0.0410934	0.0396116	PIK3CD/PIK3CG/SOCS2/SOCS3/PIK3R5/SLA2	6
CC	GO:0034358	plasma lipoprotein particle	7/914	37/19717	0.00136674	0.0410934	0.0396116	LCAT/LDLR/LPA/SAA1/SAA2/SORL1/APOA5	7
CC	GO:1990777	lipoprotein particle	7/914	37/19717	0.00136674	0.0410934	0.0396116	LCAT/LDLR/LPA/SAA1/SAA2/SORL1/APOA5	7
CC	GO:0034705	potassium channel complex	12/914	96/19717	0.00159009	0.0448205	0.0432043	HCN2/GRIK3/KCNA3/KCND3/KCNJ1/KCNJ5/KCNJ6/KCNJ8/KCNMA1/KCNAB2/KCNQ5/KCNV2	12
CC	GO:0032994	protein-lipid complex	7/914	39/19717	0.0018841	0.0480583	0.0463253	LCAT/LDLR/LPA/SAA1/SAA2/SORL1/APOA5	7
CC	GO:0008076	voltage-gated potassium channel complex	11/914	87/19717	0.00223803	0.0480583	0.0463253	HCN2/KCNA3/KCND3/KCNJ1/KCNJ5/KCNJ6/KCNJ8/KCNMA1/KCNAB2/KCNQ5/KCNV2	11
CC	GO:0060205	cytoplasmic vesicle lumen	28/914	338/19717	0.00224686	0.0480583	0.0463253	SERPINA3/ALAD/ALB/FASLG/B2M/CDA/CHI3L1/DOCK2/FGA/HBA1/HBA2/HBB/HP/HPX/IGF1/IGF2/ITIH3/LTF/ORM1/ORM2/CFP/PLG/PPBP/SAA1/PLAC8/BIN2/ARHGAP9/HRNR	28
CC	GO:0001931	uropod	4/914	13/19717	0.00234357	0.0480583	0.0463253	SPN/PIP5K1B/PSTPIP1/SCIMP	4
CC	GO:0031254	cell trailing edge	4/914	13/19717	0.00234357	0.0480583	0.0463253	SPN/PIP5K1B/PSTPIP1/SCIMP	4
CC	GO:0031983	vesicle lumen	28/914	339/19717	0.00234431	0.0480583	0.0463253	SERPINA3/ALAD/ALB/FASLG/B2M/CDA/CHI3L1/DOCK2/FGA/HBA1/HBA2/HBB/HP/HPX/IGF1/IGF2/ITIH3/LTF/ORM1/ORM2/CFP/PLG/PPBP/SAA1/PLAC8/BIN2/ARHGAP9/HRNR	28
CC	GO:0042581	specific granule	16/914	160/19717	0.00315939	0.0619516	0.0597176	ANXA3/B2M/CHI3L1/DOCK2/FPR2/HP/LTF/ORM1/ORM2/P2RX1/CFP/KCNAB2/SLC27A2/MMP25/ATP8B4/CLEC12A	16
CC	GO:0031093	platelet alpha granule lumen	9/914	67/19717	0.00363366	0.0656491	0.0632817	SERPINA3/ALB/FGA/IGF1/IGF2/ORM1/ORM2/PLG/PPBP	9
CC	GO:1904724	tertiary granule lumen	8/914	55/19717	0.00363908	0.0656491	0.0632817	B2M/CDA/HBB/HP/LTF/ORM1/CFP/PPBP	8
MF	GO:0003823	antigen binding	83/812	160/17697	4.29035e-68	3.38937e-65	2.86324e-65	CD1D/FCN2/HLA-DRB5/IGHA1/IGHA2/IGHD/IGHG1/IGHG2/IGHG3/IGHG4/IGHM/IGKC/IGLC2/IGLC3/IL7R/ITGA4/KLRD1/PLG/SLAMF1/FCN3/CLEC4M/IGKV1-5/IGHV6-1/IGHV5-51/IGHV4-61/IGHV4-59/IGHV4-39/IGHV4-34/IGHV4-31/IGHV4-28/IGHV4-4/IGHV3-74/IGHV3-73/IGHV3-72/IGHV3-66/IGHV3-64/IGHV3-53/IGHV3-49/IGHV3-48/IGHV3-33/IGHV3-30/IGHV3-23/IGHV3-21/IGHV3-20/IGHV3-15/IGHV3-13/IGHV3-11/IGHV3-7/IGHV2-70/IGHV2-26/IGHV2-5/IGHV1-69-2/I…	83
MF	GO:0034987	immunoglobulin receptor binding	48/812	76/17697	2.19779e-45	8.68126e-43	7.33367e-43	IGHA1/IGHA2/IGHD/IGHG1/IGHG2/IGHG3/IGHG4/IGHM/IGKC/IGLC2/IGLC3/IGHV6-1/IGHV5-51/IGHV4-61/IGHV4-59/IGHV4-39/IGHV4-34/IGHV4-31/IGHV4-28/IGHV4-4/IGHV3-74/IGHV3-73/IGHV3-72/IGHV3-66/IGHV3-64/IGHV3-53/IGHV3-49/IGHV3-48/IGHV3-33/IGHV3-30/IGHV3-23/IGHV3-21/IGHV3-20/IGHV3-15/IGHV3-13/IGHV3-11/IGHV3-7/IGHV2-70/IGHV2-26/IGHV2-5/IGHV1-69-2/IGHV1-69/IGHV1-58/IGHV1-24/IGHV1-18/IGHV1-3/IGLC7/IGLL5	48
MF	GO:0004896	cytokine receptor activity	21/812	96/17697	1.82269e-09	4.79975e-07	4.05468e-07	CCR4/CCR5/CCR7/CCR8/ACKR2/GHR/XCR1/CXCR3/GPR17/IL1R1/IL2RB/IL5RA/IL6ST/IL7R/IL12B/IL12RB2/IL18RAP/IL1RL1/CXCR6/IL21R/CCR2	21
MF	GO:0008009	chemokine activity	14/812	49/17697	2.47514e-08	4.88841e-06	4.12958e-06	C5/CXCL2/CXCL9/PPBP/CCL2/CCL3/CCL4/CCL5/CCL8/CCL18/CXCL12/CXCL14/CXCL13/CCL4L1	14
MF	GO:0019957	C-C chemokine binding	10/812	24/17697	4.27199e-08	6.74975e-06	5.70198e-06	CCR4/CCR5/CCR7/CCR8/ACKR2/ACKR1/XCR1/CXCR3/CXCR6/CCR2	10
MF	GO:0019955	cytokine binding	22/812	128/17697	8.06745e-08	9.33959e-06	7.88981e-06	CCR4/CCR5/CCR7/CCR8/ACKR2/ACKR1/GBP1/GHR/XCR1/CXCR3/IL1R1/IL1RN/IL2RB/IL5RA/IL6ST/IL12B/IL12RB2/ITGA4/IL1RL1/CXCR6/GREM2/CCR2	22
MF	GO:0019956	chemokine binding	11/812	32/17697	9.44101e-08	9.33959e-06	7.88981e-06	CCR4/CCR5/CCR7/CCR8/ACKR2/ACKR1/XCR1/CXCR3/ITGA4/CXCR6/CCR2	11
MF	GO:0001637	G protein-coupled chemoattractant receptor activity	10/812	26/17697	1.064e-07	9.33959e-06	7.88981e-06	CCR4/CCR5/CCR7/CCR8/ACKR2/XCR1/CXCR3/GPR17/CXCR6/CCR2	10
MF	GO:0004950	chemokine receptor activity	10/812	26/17697	1.064e-07	9.33959e-06	7.88981e-06	CCR4/CCR5/CCR7/CCR8/ACKR2/XCR1/CXCR3/GPR17/CXCR6/CCR2	10
MF	GO:0042379	chemokine receptor binding	15/812	66/17697	2.2215e-07	1.75499e-05	1.48256e-05	C5/CXCL2/CXCL9/PPBP/CCL2/CCL3/CCL4/CCL5/CCL8/CCL18/CXCL12/CXCL14/CXCL13/CCL4L1/CCR2	15
MF	GO:0016493	C-C chemokine receptor activity	9/812	23/17697	3.94284e-07	2.83168e-05	2.39212e-05	CCR4/CCR5/CCR7/CCR8/ACKR2/XCR1/CXCR3/CXCR6/CCR2	9
MF	GO:0048018	receptor ligand activity	47/812	482/17697	9.39771e-07	6.18682e-05	5.22644e-05	AMBN/FASLG/AREG/BMP4/C5/TNFSF8/CTF1/FGF2/FGF14/GAST/GDF2/GNRH2/CXCL2/IGF1/IGF2/IL1RN/IL10/IL12B/CXCL9/PNOC/PPBP/SAA1/SAA2/CCL2/CCL3/CCL4/CCL5/CCL8/CCL18/CXCL12/TG/WNT9B/SEMA3B/FGF18/CXCL14/CXCL13/COLEC10/IL24/FLRT3/HAMP/GREM2/PROK1/C1QTNF4/FNDC5/CCL4L1/GDF6/INS-IGF2	47
MF	GO:0005125	cytokine activity	28/812	220/17697	1.01948e-06	6.19533e-05	5.23363e-05	FASLG/AREG/BMP4/C5/TNFSF8/CTF1/FGF2/GDF2/CXCL2/IL1RN/IL10/IL12B/CXCL9/PPBP/CCL2/CCL3/CCL4/CCL5/CCL8/CCL18/CXCL12/CXCL14/CXCL13/IL24/GREM2/C1QTNF4/CCL4L1/GDF6	28
MF	GO:0042287	MHC protein binding	11/812	40/17697	1.20777e-06	6.81526e-05	5.75733e-05	CD8A/CD8B/KLRD1/LILRB1/KLRK1/TRAV29DV5/TRAV19/CD244/CLEC7A/FCRL6/KLRC4-KLRK1	11
MF	GO:0019825	oxygen binding	10/812	36/17697	3.352e-06	0.000176538	0.000149134	ALB/CYP1A1/CYP1B1/CYP2E1/CYP3A4/CYP4B1/CYP26A1/HBA1/HBA2/HBB	10
MF	GO:0016712	oxidoreductase activity, acting on paired donors, with incorporation or reduction of molecular oxygen, reduced flavin or flavoprotein as one donor, and incorporation of one atom of oxygen	9/812	32/17697	9.32306e-06	0.000460326	0.00038887	CYP1A1/CYP1A2/CYP1B1/CYP2C8/CYP2D6/CYP2E1/CYP3A4/CYP4B1/CYP2U1	9
MF	GO:0001664	G protein-coupled receptor binding	30/812	280/17697	1.46761e-05	0.000682006	0.000576138	APLP1/C5/FYN/GNAO1/CXCL2/CXCL9/PNOC/PPBP/SAA1/CCL2/CCL3/CCL4/CCL5/CCL8/CCL18/CXCL12/WNT9B/MARCO/AKAP5/CXCL14/GNA14/CXCL13/ZNRF3/PROK1/RSPO3/PACRG/RSPO1/RTP5/CCL4L1/CCR2	30
MF	GO:0005070	SH3/SH2 adaptor activity	11/812	52/17697	1.90688e-05	0.000795451	0.000671973	IRS1/SH2D1A/SLA/SOCS2/SH2D2A/GRAP2/TOB1/STAP1/FCRL2/SLA2/CLNK	11
MF	GO:0004745	retinol dehydrogenase activity	7/812	20/17697	1.91311e-05	0.000795451	0.000671973	ADH1A/ADH1B/ADH1C/ADH4/ADH6/RDH16/HSD17B6	7
MF	GO:0030246	carbohydrate binding	29/812	271/17697	2.07596e-05	0.000820003	0.000692714	ALDOB/SIGLEC6/CD69/CHI3L1/NCAN/FCN2/GCK/KLRD1/KRT1/MBL2/SELE/UGP2/FCN3/CLEC4M/COLEC10/KLRK1/FBXO2/CLEC1B/EVA1C/CLEC7A/ALPK1/GALNT13/CLEC12A/CLEC9A/CLEC4G/PKD1L3/CLEC17A/PPP1R3G/KLRC4-KLRK1	29
MF	GO:0015026	coreceptor activity	10/812	44/17697	2.3446e-05	0.000882016	0.000745101	CD8A/CD8B/CD80/CCR5/CCR8/GPR15/ITGA4/CXCR6/FCRL1/RGMB	10
MF	GO:0015378	sodium:chloride symporter activity	5/812	10/17697	4.17451e-05	0.00149903	0.00126634	SLC6A2/SLC6A4/SLC12A1/SLC22A1/SLC22A3	5
MF	GO:0005539	glycosaminoglycan binding	25/812	229/17697	5.45192e-05	0.00187261	0.00158193	ANG/APLP1/BMP4/HAPLN1/NCAN/ECM2/FGF2/HABP2/IGHM/LPA/LTF/PTPRC/SAA1/CCL8/LIPG/TENM1/CXCL13/ABI3BP/PLA2G2D/STAB2/EVA1C/GREM2/RSPO3/APOA5/RSPO1	25
MF	GO:0008201	heparin binding	20/812	169/17697	9.82106e-05	0.00323276	0.00273094	ANG/APLP1/BMP4/ECM2/FGF2/LPA/LTF/PTPRC/SAA1/CCL8/LIPG/TENM1/CXCL13/ABI3BP/PLA2G2D/EVA1C/GREM2/RSPO3/APOA5/RSPO1	20
MF	GO:0048020	CCR chemokine receptor binding	9/812	43/17697	0.000119116	0.00376405	0.00317976	CCL2/CCL3/CCL4/CCL5/CCL8/CCL18/CXCL13/CCL4L1/CCR2	9
MF	GO:0020037	heme binding	17/812	135/17697	0.000150428	0.00457071	0.0038612	CYB5A/CYP1A1/CYP1A2/CYP1B1/CYP2C8/CYP2D6/CYP2E1/CYP3A4/CYP4B1/CYP26A1/HBA1/HBA2/HBB/DUOX2/FLVCR2/STEAP4/CYP2U1	17
MF	GO:0005249	voltage-gated potassium channel activity	13/812	87/17697	0.000160163	0.00468624	0.0039588	HCN2/KCNA3/KCND3/KCNJ1/KCNJ5/KCNJ6/KCNJ8/KCNJ10/KCNMA1/KCNAB2/KCNAB3/KCNQ5/KCNV2	13
MF	GO:0015373	anion:sodium symporter activity	5/812	13/17697	0.000189948	0.00535925	0.00452733	SLC6A2/SLC6A4/SLC12A1/SLC22A1/SLC22A3	5
MF	GO:0042288	MHC class I protein binding	6/812	20/17697	0.000204068	0.0055591	0.00469616	CD8A/CD8B/LILRB1/KLRK1/CD244/KLRC4-KLRK1	6
MF	GO:0008395	steroid hydroxylase activity	8/812	38/17697	0.000272275	0.00696716	0.00588565	CYP1A1/CYP1A2/CYP1B1/CYP2C8/CYP2D6/CYP2E1/CYP3A4/CYP2U1	8
MF	GO:0035591	signaling adaptor activity	12/812	80/17697	0.000273395	0.00696716	0.00588565	IRS1/SH2D1A/SLA/SOCS2/SH2D2A/GRAP2/TOB1/STAP1/TRAT1/FCRL2/SLA2/CLNK	12
MF	GO:0005126	cytokine receptor binding	27/812	286/17697	0.000322436	0.00796013	0.00672448	FASLG/BMP4/C5/TNFSF8/CTF1/GDF2/CXCL2/IL1RN/IL6ST/IL10/IL12B/CXCL9/PPBP/CCL2/CCL3/CCL4/CCL5/CCL8/CCL18/CXCL12/SOCS2/CXCL14/CXCL13/STAP1/CCL4L1/GDF6/CCR2	27
MF	GO:0046906	tetrapyrrole binding	17/812	145/17697	0.000356717	0.00853958	0.00721399	CYB5A/CYP1A1/CYP1A2/CYP1B1/CYP2C8/CYP2D6/CYP2E1/CYP3A4/CYP4B1/CYP26A1/HBA1/HBA2/HBB/DUOX2/FLVCR2/STEAP4/CYP2U1	17
MF	GO:0015079	potassium ion transmembrane transporter activity	18/812	159/17697	0.000373508	0.00867858	0.0073314	ATP1A3/HCN2/GRIK3/KCNA3/KCND3/KCNJ1/KCNJ5/KCNJ6/KCNJ8/KCNJ10/KCNMA1/KCNN2/SLC12A1/KCNAB2/KCNAB3/KCNQ5/SLC24A4/KCNV2	18
MF	GO:0004252	serine-type endopeptidase activity	18/812	160/17697	0.000403247	0.00910187	0.00768899	GZMA/GZMB/GZMK/HABP2/HP/CFI/KLK1/KLKB1/LPA/LTF/MMP3/PLG/KLK4/CORIN/TMPRSS5/RHBDL3/HTRA4/OVCH1	18
MF	GO:0005267	potassium channel activity	15/812	123/17697	0.000511481	0.0112242	0.00948185	HCN2/GRIK3/KCNA3/KCND3/KCNJ1/KCNJ5/KCNJ6/KCNJ8/KCNJ10/KCNMA1/KCNN2/KCNAB2/KCNAB3/KCNQ5/KCNV2	15
MF	GO:0015377	cation:chloride symporter activity	5/812	16/17697	0.000574601	0.0119456	0.0100913	SLC6A2/SLC6A4/SLC12A1/SLC22A1/SLC22A3	5
MF	GO:0030280	structural constituent of epidermis	5/812	16/17697	0.000574601	0.0119456	0.0100913	FLG/KRT1/PKP1/KRTAP5-8/HRNR	5
MF	GO:0016814	hydrolase activity, acting on carbon-nitrogen (but not peptide) bonds, in cyclic amidines	7/812	34/17697	0.000757285	0.0153399	0.0129587	AMPD1/CDA/GCH1/MTHFD1/ZBP1/APOBEC3A/MTHFD2L	7
MF	GO:0004715	non-membrane spanning protein tyrosine kinase activity	8/812	46/17697	0.00105089	0.0207551	0.0175333	BLK/FYN/ITK/LCK/SLA/TXK/ZAP70/STYK1	8
MF	GO:0015296	anion:cation symporter activity	5/812	19/17697	0.00136395	0.0262809	0.0222014	SLC6A2/SLC6A4/SLC12A1/SLC22A1/SLC22A3	5
MF	GO:0042056	chemoattractant activity	7/812	38/17697	0.0015149	0.0284946	0.0240714	BMP4/FGF2/SAA1/SAA2/CCL3/CCL5/COLEC10	7
MF	GO:0038024	cargo receptor activity	11/812	85/17697	0.0017046	0.0300642	0.0253973	CD5/CD5L/CD6/ACKR2/FPR2/CFI/LDLR/SORL1/MARCO/STAB2/TMPRSS5	11
MF	GO:0001614	purinergic nucleotide receptor activity	5/812	20/17697	0.00175057	0.0300642	0.0253973	P2RX1/P2RY14/GPR171/P2RY13/P2RY12	5
MF	GO:0005242	inward rectifier potassium channel activity	5/812	20/17697	0.00175057	0.0300642	0.0253973	KCNJ1/KCNJ5/KCNJ6/KCNJ8/KCNJ10	5
MF	GO:0016502	nucleotide receptor activity	5/812	20/17697	0.00175057	0.0300642	0.0253973	P2RX1/P2RY14/GPR171/P2RY13/P2RY12	5
MF	GO:0008236	serine-type peptidase activity	18/812	182/17697	0.00181649	0.0305325	0.0257929	GZMA/GZMB/GZMK/HABP2/HP/CFI/KLK1/KLKB1/LPA/LTF/MMP3/PLG/KLK4/CORIN/TMPRSS5/RHBDL3/HTRA4/OVCH1	18
MF	GO:0004497	monooxygenase activity	12/812	99/17697	0.00189806	0.0312389	0.0263897	CYP1A1/CYP1A2/CYP1B1/CYP2C8/CYP2D6/CYP2E1/CYP3A4/CYP4B1/CYP26A1/FMO2/FMO3/CYP2U1	12
MF	GO:0046873	metal ion transmembrane transporter activity	34/812	438/17697	0.00201014	0.0324084	0.0273777	ATP1A3/ATP2A3/HCN2/GPM6A/GRIK3/KCNA3/KCND3/KCNJ1/KCNJ5/KCNJ6/KCNJ8/KCNJ10/KCNMA1/KCNN2/SCNN1A/SLC1A1/SLC6A2/SLC6A4/SLC6A7/SLC12A1/SLC22A1/SLC22A3/SLC30A2/KCNAB2/SLC5A6/CACNA1I/KCNAB3/SLC17A2/KCNQ5/SLC24A4/SLC9B2/KCNV2/MCOLN2/PKD1L3	34
MF	GO:0005044	scavenger receptor activity	8/812	51/17697	0.00209643	0.0327247	0.0276448	CD5/CD5L/CD6/ACKR2/CFI/MARCO/STAB2/TMPRSS5	8
MF	GO:0008519	ammonium transmembrane transporter activity	6/812	30/17697	0.0021126	0.0327247	0.0276448	RHCE/RHD/SLC6A2/SLC6A4/SLC22A1/SLC22A3	6
MF	GO:0001608	G protein-coupled nucleotide receptor activity	4/812	13/17697	0.00225589	0.0336256	0.0284059	P2RY14/GPR171/P2RY13/P2RY12	4
MF	GO:0045028	G protein-coupled purinergic nucleotide receptor activity	4/812	13/17697	0.00225589	0.0336256	0.0284059	P2RY14/GPR171/P2RY13/P2RY12	4
MF	GO:0017171	serine hydrolase activity	18/812	186/17697	0.00231047	0.0338014	0.0285544	GZMA/GZMB/GZMK/HABP2/HP/CFI/KLK1/KLKB1/LPA/LTF/MMP3/PLG/KLK4/CORIN/TMPRSS5/RHBDL3/HTRA4/OVCH1	18
MF	GO:0015077	monovalent inorganic cation transmembrane transporter activity	30/812	382/17697	0.00302519	0.0414684	0.0350313	ATP1A3/ATP2A3/HCN2/CYB5A/GRIK3/KCNA3/KCND3/KCNJ1/KCNJ5/KCNJ6/KCNJ8/KCNJ10/KCNMA1/KCNN2/SCNN1A/SLC1A1/SLC6A2/SLC6A4/SLC6A7/SLC12A1/SLC22A1/SLC22A3/KCNAB2/SLC5A6/KCNAB3/SLC17A2/KCNQ5/SLC24A4/SLC9B2/KCNV2	30
MF	GO:0005344	oxygen carrier activity	4/812	14/17697	0.00304452	0.0414684	0.0350313	HBA1/HBA2/HBB/IPCEF1	4
MF	GO:0046935	1-phosphatidylinositol-3-kinase regulator activity	4/812	14/17697	0.00304452	0.0414684	0.0350313	SOCS2/SOCS3/PIK3R5/SLA2	4
MF	GO:0060229	lipase activator activity	4/812	14/17697	0.00304452	0.0414684	0.0350313	CCL3/CCL5/CCL8/APOA5	4
MF	GO:0099094	ligand-gated cation channel activity	12/812	105/17697	0.00312339	0.0418216	0.0353297	HCN2/CHRNA1/GRIK3/KCNJ1/KCNJ5/KCNJ6/KCNJ8/KCNJ10/P2RX1/SCNN1A/CHRNA6/MCOLN2	12
MF	GO:0015081	sodium ion transmembrane transporter activity	15/812	149/17697	0.0035595	0.0468667	0.0395916	ATP1A3/HCN2/GRIK3/SCNN1A/SLC1A1/SLC6A2/SLC6A4/SLC6A7/SLC12A1/SLC22A1/SLC22A3/SLC5A6/SLC17A2/SLC24A4/SLC9B2	15
MF	GO:0005506	iron ion binding	15/812	152/17697	0.00429506	0.0556246	0.04699	CDO1/CYP1A1/CYP1A2/CYP1B1/CYP2C8/CYP2D6/CYP2E1/CYP3A4/CYP4B1/CYP26A1/HBA1/HBA2/LTF/TET2/CYP2U1	15
MF	GO:0023023	MHC protein complex binding	5/812	25/17697	0.00496149	0.0622156	0.0525578	CD8A/MS4A1/KLRD1/LILRB1/CD160	5
MF	GO:0035586	purinergic receptor activity	5/812	25/17697	0.00496149	0.0622156	0.0525578	P2RX1/P2RY14/GPR171/P2RY13/P2RY12	5
MF	GO:0003996	acyl-CoA ligase activity	4/812	16/17697	0.00514493	0.0625307	0.0528241	ACSL1/ACSM3/SLC27A2/ACSL5	4
MF	GO:0005159	insulin-like growth factor receptor binding	4/812	16/17697	0.00514493	0.0625307	0.0528241	IGF1/IGF2/IRS1/SOCS2	4
MF	GO:0015370	solute:sodium symporter activity	9/812	72/17697	0.00550929	0.0659445	0.055708	SLC1A1/SLC6A2/SLC6A4/SLC6A7/SLC12A1/SLC22A1/SLC22A3/SLC5A6/SLC17A2	9
MF	GO:0022843	voltage-gated cation channel activity	14/812	142/17697	0.00573663	0.0676408	0.0571409	HCN2/KCNA3/KCND3/KCNJ1/KCNJ5/KCNJ6/KCNJ8/KCNJ10/KCNMA1/KCNAB2/CACNA1I/KCNAB3/KCNQ5/KCNV2	14
MF	GO:0015293	symporter activity	14/812	144/17697	0.00647983	0.0734215	0.0620243	SLC1A1/SLC6A2/SLC6A4/SLC6A7/SLC12A1/SLC22A1/SLC22A3/SLC5A6/SLC16A5/SLC17A2/SLC38A2/SLC24A4/SLC16A11/SLC16A12	14
MF	GO:0035014	phosphatidylinositol 3-kinase regulator activity	4/812	17/17697	0.00648693	0.0734215	0.0620243	SOCS2/SOCS3/PIK3R5/SLA2	4
MF	GO:0001618	virus receptor activity	9/812	74/17697	0.00659864	0.0734215	0.0620243	CD80/CCR5/CR1/GPR15/ITGB7/LDLR/SLAMF1/CLEC4M/CLEC4G	9
MF	GO:0104005	hijacked molecular function	9/812	74/17697	0.00659864	0.0734215	0.0620243	CD80/CCR5/CR1/GPR15/ITGB7/LDLR/SLAMF1/CLEC4M/CLEC4G	9
MF	GO:0008528	G protein-coupled peptide receptor activity	14/812	146/17697	0.00729806	0.0800759	0.0676457	CCR4/CCR5/CCR7/CCR8/ACKR2/FPR2/GP1BA/XCR1/CXCR3/GPR17/GRPR/SSTR1/CXCR6/CCR2	14
MF	GO:0008083	growth factor activity	15/812	163/17697	0.00811815	0.0878539	0.0742164	AMBN/AREG/BMP4/FGF2/FGF14/GDF2/IGF1/IGF2/IL10/IL12B/PPBP/CXCL12/FGF18/PROK1/GDF6	15
MF	GO:0031720	haptoglobin binding	3/812	10/17697	0.00906365	0.0963066	0.081357	HBA1/HBA2/HBB	3
MF	GO:0008146	sulfotransferase activity	7/812	52/17697	0.00923304	0.0963066	0.081357	SULT2A1/NDST3/HS3ST4/HS3ST2/UST/SULT4A1/SULT1B1	7
MF	GO:0001784	phosphotyrosine residue binding	6/812	40/17697	0.00926494	0.0963066	0.081357	IRS1/LCK/ZAP70/SOCS3/STAP1/SAMSN1	6
MF	GO:0015238	drug transmembrane transporter activity	10/812	92/17697	0.00945443	0.097	0.0819427	SLC1A1/SLC6A2/SLC6A7/SLC22A1/SLC22A3/SLC38A2/SLC38A5/SLC25A25/SLC25A30/SLC16A12	10
KEGG	hsa04060	Cytokine-cytokine receptor interaction	45/399	295/8076	6.84761e-12	1.15888e-09	9.87304e-10	FASLG/TNFRSF17/BMP4/TNFRSF8/TNFSF8/CCR4/CCR5/CCR7/CCR8/CTF1/GDF2/GHR/XCR1/CXCR3/CXCL2/IL1R1/IL1RN/IL2RB/IL5RA/IL6ST/IL7R/IL10/IL12B/IL12RB2/CXCL9/PPBP/CCL2/CCL3/CCL4/CCL5/CCL8/CCL18/CXCL12/IL18RAP/IL1RL1/CXCL14/CXCL13/CXCR6/IL24/IL21R/TNFRSF19/TNFRSF13C/CCL4L1/GDF6/CCR2	45
KEGG	hsa04061	Viral protein interaction with cytokine and cytokine receptor	25/399	100/8076	8.33723e-12	1.15888e-09	9.87304e-10	CCR4/CCR5/CCR7/CCR8/XCR1/CXCR3/CXCL2/IL2RB/IL6ST/IL10/CXCL9/PPBP/CCL2/CCL3/CCL4/CCL5/CCL8/CCL18/CXCL12/IL18RAP/CXCL14/CXCL13/IL24/CCL4L1/CCR2	25
KEGG	hsa00830	Retinol metabolism	16/399	68/8076	1.28851e-07	1.19402e-05	1.01724e-05	ADH1A/ADH1B/ADH1C/ADH4/ADH6/CYP1A1/CYP1A2/CYP2C8/CYP3A4/CYP26A1/UGT2B7/UGT2B15/UGT2B17/RDH16/HSD17B6/UGT2A3	16
KEGG	hsa04062	Chemokine signaling pathway	28/399	192/8076	2.07491e-07	1.36129e-05	1.15975e-05	CCR4/CCR5/CCR7/CCR8/DOCK2/XCR1/CXCR3/CXCL2/ITK/CXCL9/PIK3CD/PIK3CG/PPBP/PRKCB/RAC2/CCL2/CCL3/CCL4/CCL5/CCL8/CCL18/CXCL12/CXCL14/CXCL13/CXCR6/PIK3R5/CCL4L1/CCR2	28
KEGG	hsa00982	Drug metabolism - cytochrome P450	16/399	71/8076	2.44836e-07	1.36129e-05	1.15975e-05	ADH1A/ADH1B/ADH1C/ADH4/ADH6/CYP1A2/CYP2C8/CYP2D6/CYP2E1/CYP3A4/FMO2/FMO3/UGT2B7/UGT2B15/UGT2B17/UGT2A3	16
KEGG	hsa05204	Chemical carcinogenesis	17/399	82/8076	3.71551e-07	1.72152e-05	1.46665e-05	NAT2/ADH1A/ADH1B/ADH1C/ADH4/ADH6/CYP1A1/CYP1A2/CYP1B1/CYP2C8/CYP2E1/CYP3A4/SULT2A1/UGT2B7/UGT2B15/UGT2B17/UGT2A3	17
KEGG	hsa00980	Metabolism of xenobiotics by cytochrome P450	16/399	77/8076	7.95402e-07	3.15888e-05	2.69121e-05	ADH1A/ADH1B/ADH1C/ADH4/ADH6/CYP1A1/CYP1A2/CYP1B1/CYP2D6/CYP2E1/CYP3A4/SULT2A1/UGT2B7/UGT2B15/UGT2B17/UGT2A3	16
KEGG	hsa04640	Hematopoietic cell lineage	17/399	99/8076	5.8294e-06	0.000202572	0.000172581	CD1D/CD2/CD3E/CD3G/CD5/CD8A/CD8B/MS4A1/CD38/CR1/GP1BA/GP5/HLA-DRB5/IL1R1/IL5RA/IL7R/ITGA4	17
KEGG	hsa05340	Primary immunodeficiency	10/399	38/8076	1.05306e-05	0.000325279	0.000277122	CD3E/CD8A/CD8B/CD79A/IL7R/LCK/PTPRC/ZAP70/ICOS/TNFRSF13C	10
KEGG	hsa05144	Malaria	10/399	50/8076	0.000134396	0.00373621	0.00318307	CR1/ACKR1/HBA1/HBA2/HBB/IL10/CCL2/SELE/KLRK1/KLRC4-KLRK1	10
KEGG	hsa04660	T cell receptor signaling pathway	15/399	104/8076	0.000164912	0.00386273	0.00329085	CD3E/CD3G/CD247/CD8A/CD8B/FYN/IL10/ITK/LCK/PIK3CD/PRKCQ/PTPRC/ZAP70/GRAP2/ICOS	15
KEGG	hsa00140	Steroid hormone biosynthesis	11/399	61/8076	0.000166736	0.00386273	0.00329085	COMT/CYP1A1/CYP1A2/CYP1B1/CYP2E1/CYP3A4/UGT2B7/UGT2B15/UGT2B17/HSD17B6/UGT2A3	11
KEGG	hsa04610	Complement and coagulation cascades	13/399	85/8076	0.000246859	0.00527898	0.00449743	C4BPA/C5/C8A/C9/CR1/FGA/CFI/KLKB1/MBL2/PLG/THBD/CFHR4/CFHR3	13
KEGG	hsa04960	Aldosterone-regulated sodium reabsorption	8/399	37/8076	0.000360624	0.00668357	0.00569406	ATP1A3/IGF1/IRS1/KCNJ1/PIK3CD/PRKCB/SCNN1A/SGK1	8
KEGG	hsa05143	African trypanosomiasis	8/399	37/8076	0.000360624	0.00668357	0.00569406	FASLG/HBA1/HBA2/HBB/IL10/IL12B/PRKCB/SELE	8
KEGG	hsa04976	Bile secretion	13/399	90/8076	0.000438837	0.0076248	0.00649595	ATP1A3/BAAT/CYP3A4/KCNN2/LDLR/SLC22A1/SULT2A1/UGT2B7/UGT2B15/UGT2B17/SLCO1B3/UGT2A3/SLCO1B7	13
KEGG	hsa04672	Intestinal immune network for IgA production	9/399	49/8076	0.000565484	0.00924732	0.00787825	TNFRSF17/CD80/HLA-DRB5/IL10/ITGA4/ITGB7/CXCL12/ICOS/TNFRSF13C	9
KEGG	hsa04650	Natural killer cell mediated cytotoxicity	16/399	131/8076	0.000694703	0.0107293	0.00914083	FASLG/CD247/FYN/GZMB/KLRD1/LCK/SH2D1A/PIK3CD/PRF1/PRKCB/RAC2/ZAP70/NCR1/KLRK1/CD244/KLRC4-KLRK1	16
KEGG	hsa04659	Th17 cell differentiation	14/399	107/8076	0.000745919	0.010914	0.00929816	CD3E/CD3G/CD247/HLA-DRB5/IL1R1/IL2RB/IL6ST/IRF4/LCK/PRKCQ/ZAP70/TBX21/IL21R/FOXP3	14
KEGG	hsa04514	Cell adhesion molecules	17/399	149/8076	0.00104406	0.014147	0.0120525	CD2/CD6/CD8A/CD8B/CD80/HLA-DRB5/ITGA4/ITGB7/PTPRC/SELE/SPN/NRXN3/CD226/CD274/ICOS/NLGN4X/TIGIT	17
KEGG	hsa04929	GnRH secretion	10/399	64/8076	0.00106865	0.014147	0.0120525	HCN2/ESR2/GNRH2/KCNJ5/KCNJ6/KCNN2/PIK3CD/PRKCB/CACNA1I/GABBR2	10
KEGG	hsa00071	Fatty acid degradation	8/399	44/8076	0.0012228	0.0154517	0.0131641	ADH1A/ADH1B/ADH1C/ADH4/ADH6/ACSL1/ACAA2/ACSL5	8
KEGG	hsa00350	Tyrosine metabolism	7/399	36/8076	0.00163737	0.0197908	0.0168608	ADH1A/ADH1B/ADH1C/ADH4/ADH6/COMT/GSTZ1	7
KEGG	hsa04064	NF-kappa B signaling pathway	13/399	104/8076	0.00174677	0.0200186	0.0170548	CXCL2/IL1R1/LCK/GADD45B/PRKCB/PRKCQ/CCL4/CXCL12/TNFAIP3/ZAP70/GADD45G/TNFRSF13C/CCL4L1	13
KEGG	hsa04658	Th1 and Th2 cell differentiation	12/399	92/8076	0.00180023	0.0200186	0.0170548	RUNX3/CD3E/CD3G/CD247/HLA-DRB5/IL2RB/IL12B/IL12RB2/LCK/PRKCQ/ZAP70/TBX21	12
KEGG	hsa05330	Allograft rejection	7/399	38/8076	0.00227351	0.0243091	0.0207101	FASLG/CD80/GZMB/HLA-DRB5/IL10/IL12B/PRF1	7
KEGG	hsa00591	Linoleic acid metabolism	6/399	29/8076	0.00252331	0.0259808	0.0221343	CYP1A2/CYP2C8/CYP2E1/CYP3A4/PLA2G2D/PLA2G4B	6
KEGG	hsa05142	Chagas disease	12/399	102/8076	0.00430284	0.0412479	0.0351412	FASLG/CD3E/CD3G/CD247/GNAO1/IL10/IL12B/PIK3CD/CCL2/CCL3/CCL5/GNA14	12
KEGG	hsa05146	Amoebiasis	12/399	102/8076	0.00430284	0.0412479	0.0351412	C8A/C9/CD1D/COL4A3/CXCL2/IL1R1/IL10/IL12B/LAMA3/PIK3CD/PRKCB/GNA14	12
KEGG	hsa00010	Glycolysis / Gluconeogenesis	9/399	67/8076	0.00537714	0.0498281	0.0424511	ADH1A/ADH1B/ADH1C/ADH4/ADH6/ALDOB/ENO3/G6PC/GCK	9
KEGG	hsa04978	Mineral absorption	8/399	59/8076	0.00803176	0.0720268	0.0613632	ATP1A3/MT1E/MT1F/MT1G/MT1H/MT1M/MT1X/MT2A	8
KEGG	hsa05162	Measles	14/399	139/8076	0.00859378	0.0746585	0.0636053	FASLG/CD3E/CD3G/IL2RB/IL12B/MX1/OAS1/OAS2/OAS3/PIK3CD/SLAMF1/TNFAIP3/CLEC4M/IRF9	14
KEGG	hsa05164	Influenza A	16/399	171/8076	0.0102842	0.0866365	0.07381	FASLG/HLA-DRB5/IL12B/MX1/OAS1/OAS2/OAS3/PIK3CD/PLG/PRKCB/CCL2/CCL5/SOCS3/IRF9/NXF3/RSAD2	16

## Sheet: enrich_RS2
Enrichment pathways in RS2
ONTOLOGY	ID	Description	GeneRatio	BgRatio	pvalue	p.adjust	qvalue	geneID	Count
BP	GO:1902850	microtubule cytoskeleton organization involved in mitosis	21/771	131/18670	9.39224e-08	0.000419833	0.000405152	BIRC5/CCNB1/CDC20/CENPA/HSPA1A/HSPA1B/KIFC1/MYBL2/NEK2/PLK1/TTK/AURKB/TACC3/MSTO1/SPC25/ACTL8/NUF2/PSRC1/SAPCD2/MISP/WDR62	21
BP	GO:0007052	mitotic spindle organization	18/771	106/18670	3.17837e-07	0.000710367	0.000685525	BIRC5/CCNB1/CDC20/HSPA1A/HSPA1B/KIFC1/MYBL2/NEK2/PLK1/TTK/AURKB/TACC3/MSTO1/SPC25/NUF2/PSRC1/MISP/WDR62	18
BP	GO:0140014	mitotic nuclear division	30/771	264/18670	5.40803e-07	0.000805797	0.000777618	BIRC5/CCNB1/CDC20/CDC25C/CDKN1C/HSPA1A/HSPA1B/KIFC1/MYBL2/NEK2/PLK1/TTK/SPHK1/AURKB/PTTG1/TRIP13/MAD2L1BP/TACC3/KIF2C/UBE2C/SIRT2/UBE2S/MSTO1/NCAPG/CDT1/NUF2/USP44/PSRC1/MISP/CDC26	30
BP	GO:0007059	chromosome segregation	32/771	321/18670	4.04794e-06	0.00452357	0.00436538	BIRC5/CCNB1/CDC20/KIFC1/NEK2/PLK1/TTK/AURKB/PTTG1/TRIP13/TACC3/KIF2C/SIRT2/SMC1B/MSTO1/HJURP/BEX4/SPC25/NCAPG/FAM83D/CDT1/NUF2/USP44/PSRC1/BANF2/EME1/CDCA2/SKA1/SKA3/CDC26/CCDC36/CENPW	32
BP	GO:0007156	homophilic cell adhesion via plasma membrane adhesion molecules	21/771	168/18670	6.11225e-06	0.00470535	0.00454081	CDH6/CDH16/CDH17/CDH18/PCDH9/PCDHGB6/PCDHGA10/PCDHGA4/PCDHGA3/PCDHB10/PCDHB9/PCDHB7/PCDHB2/PCDHA5/PCDHA3/PCDHA2/PCDHA1/PCDHB16/KIRREL3/IGSF11/SDK1	21
BP	GO:0000280	nuclear division	37/771	407/18670	6.36925e-06	0.00470535	0.00454081	BIRC5/BRDT/CCNB1/CDC20/CDC25C/CDKN1C/HSPA1A/HSPA1B/KIFC1/MYBL2/NEK2/PLK1/TTK/SPHK1/AURKB/PTTG1/TRIP13/MAD2L1BP/TACC3/KIF2C/UBE2C/SIRT2/UBE2S/DDX4/MSTO1/NCAPG/CDT1/NUF2/MND1/USP44/PSRC1/MISP/EME1/CDC26/CCDC36/TUBB8/TEX19	37
BP	GO:0007051	spindle organization	21/771	170/18670	7.36856e-06	0.00470535	0.00454081	BIRC5/CCNB1/CDC20/HSPA1A/HSPA1B/KIFC1/MYBL2/NEK2/PLK1/TTK/AURKB/TACC3/MSTO1/SPC25/NUF2/LZTS2/PSRC1/MISP/WDR62/TUBB8/CENPW	21
BP	GO:0007088	regulation of mitotic nuclear division	20/771	164/18670	1.46476e-05	0.00749114	0.00722918	CCNB1/CDC20/CDC25C/CDKN1C/HSPA1A/HSPA1B/NEK2/PLK1/TTK/SPHK1/AURKB/PTTG1/TRIP13/MAD2L1BP/TACC3/UBE2C/SIRT2/CDT1/USP44/CDC26	20
BP	GO:0090307	mitotic spindle assembly	11/771	56/18670	1.50828e-05	0.00749114	0.00722918	BIRC5/CDC20/HSPA1A/HSPA1B/KIFC1/MYBL2/NEK2/PLK1/AURKB/MSTO1/MISP	11
BP	GO:0010965	regulation of mitotic sister chromatid separation	11/771	57/18670	1.79998e-05	0.00804593	0.00776456	CCNB1/CDC20/PLK1/TTK/AURKB/PTTG1/TRIP13/TACC3/CDT1/USP44/CDC26	11
BP	GO:0051983	regulation of chromosome segregation	15/771	103/18670	2.09186e-05	0.00850057	0.00820331	CCNB1/CDC20/NEK2/PLK1/TTK/AURKB/PTTG1/TRIP13/TACC3/KIF2C/SIRT2/CDT1/USP44/CDC26/CCDC36	15
BP	GO:2000816	negative regulation of mitotic sister chromatid separation	9/771	39/18670	2.3152e-05	0.00862412	0.00832254	CCNB1/CDC20/PLK1/TTK/AURKB/PTTG1/TRIP13/CDT1/USP44	9
BP	GO:0098742	cell-cell adhesion via plasma-membrane adhesion molecules	27/771	273/18670	2.59872e-05	0.00890056	0.00858931	CDH6/CDH16/CDH17/CDH18/CLDN4/EFNA5/EPCAM/MPZ/CLDN11/PCDH9/PCDHGB6/PCDHGA10/PCDHGA4/PCDHGA3/PCDHB10/PCDHB9/PCDHB7/PCDHB2/PCDHA5/PCDHA3/PCDHA2/PCDHA1/PCDHB16/LRFN4/KIRREL3/IGSF11/SDK1	27
BP	GO:1905819	negative regulation of chromosome separation	9/771	40/18670	2.87879e-05	0.00890056	0.00858931	CCNB1/CDC20/PLK1/TTK/AURKB/PTTG1/TRIP13/CDT1/USP44	9
BP	GO:0051306	mitotic sister chromatid separation	11/771	60/18670	2.98677e-05	0.00890056	0.00858931	CCNB1/CDC20/PLK1/TTK/AURKB/PTTG1/TRIP13/TACC3/CDT1/USP44/CDC26	11
BP	GO:0051783	regulation of nuclear division	21/771	188/18670	3.45049e-05	0.0094287	0.00909898	CCNB1/CDC20/CDC25C/CDKN1C/HSPA1A/HSPA1B/NEK2/PLK1/TTK/SPHK1/AURKB/PTTG1/TRIP13/MAD2L1BP/TACC3/UBE2C/SIRT2/CDT1/USP44/CDC26/CCDC36	21
BP	GO:0006821	chloride transport	15/771	108/18670	3.70594e-05	0.0094287	0.00909898	CA7/CLCNKA/CLIC1/CLDN4/GABRA2/GABRG3/GLRB/P2RY6/FXYD3/PRKG2/BEST1/BSND/GLRA3/TTYH1/SLC26A6	15
BP	GO:0051321	meiotic cell cycle	25/771	249/18670	3.99045e-05	0.0094287	0.00909898	BRDT/CDC20/CDC25A/CDC25C/NEK2/OVOL1/PLK1/TTK/EXO1/PTTG1/TRIP13/SIRT2/SMC1B/DUSP13/DDX4/MNS1/NUF2/MND1/RSPH1/HUS1B/EME1/CCDC36/STRA8/TUBB8/TEX19	25
BP	GO:1905818	regulation of chromosome separation	11/771	62/18670	4.10928e-05	0.0094287	0.00909898	CCNB1/CDC20/PLK1/TTK/AURKB/PTTG1/TRIP13/TACC3/CDT1/USP44/CDC26	11
BP	GO:0033048	negative regulation of mitotic sister chromatid segregation	9/771	42/18670	4.35961e-05	0.0094287	0.00909898	CCNB1/CDC20/PLK1/TTK/AURKB/PTTG1/TRIP13/CDT1/USP44	9
BP	GO:0000070	mitotic sister chromatid segregation	18/771	151/18670	5.24929e-05	0.0094287	0.00909898	CCNB1/CDC20/KIFC1/NEK2/PLK1/TTK/AURKB/PTTG1/TRIP13/TACC3/KIF2C/MSTO1/NCAPG/CDT1/NUF2/USP44/PSRC1/CDC26	18
BP	GO:0007093	mitotic cell cycle checkpoint	19/771	165/18670	5.30545e-05	0.0094287	0.00909898	CCNB1/CDK1/CDC20/CDC25C/ARID3A/SFN/MUC1/PLK1/SOX4/TTK/AURKB/TRIP13/MAD2L1BP/GTSE1/PCBP4/CDT1/USP44/HUS1B/EME1	19
BP	GO:0048285	organelle fission	37/771	449/18670	5.46387e-05	0.0094287	0.00909898	BIRC5/BRDT/CCNB1/CDC20/CDC25C/CDKN1C/HSPA1A/HSPA1B/KIFC1/MYBL2/NEK2/PLK1/TTK/SPHK1/AURKB/PTTG1/TRIP13/MAD2L1BP/TACC3/KIF2C/UBE2C/SIRT2/UBE2S/DDX4/MSTO1/NCAPG/CDT1/NUF2/MND1/USP44/PSRC1/MISP/EME1/CDC26/CCDC36/TUBB8/TEX19	37
BP	GO:0007094	mitotic spindle assembly checkpoint	8/771	34/18670	5.69519e-05	0.0094287	0.00909898	CCNB1/CDC20/PLK1/TTK/AURKB/TRIP13/CDT1/USP44	8
BP	GO:0031577	spindle checkpoint	8/771	34/18670	5.69519e-05	0.0094287	0.00909898	CCNB1/CDC20/PLK1/TTK/AURKB/TRIP13/CDT1/USP44	8
BP	GO:0071173	spindle assembly checkpoint	8/771	34/18670	5.69519e-05	0.0094287	0.00909898	CCNB1/CDC20/PLK1/TTK/AURKB/TRIP13/CDT1/USP44	8
BP	GO:0071174	mitotic spindle checkpoint	8/771	34/18670	5.69519e-05	0.0094287	0.00909898	CCNB1/CDC20/PLK1/TTK/AURKB/TRIP13/CDT1/USP44	8
BP	GO:0007091	metaphase/anaphase transition of mitotic cell cycle	10/771	54/18670	6.25813e-05	0.00992263	0.00957564	CCNB1/CDC20/PLK1/TTK/AURKB/TRIP13/TACC3/CDT1/USP44/CDC26	10
BP	GO:0033046	negative regulation of sister chromatid segregation	9/771	44/18670	6.4375e-05	0.00992263	0.00957564	CCNB1/CDC20/PLK1/TTK/AURKB/PTTG1/TRIP13/CDT1/USP44	9
BP	GO:0051985	negative regulation of chromosome segregation	9/771	45/18670	7.75507e-05	0.011555	0.011151	CCNB1/CDC20/PLK1/TTK/AURKB/PTTG1/TRIP13/CDT1/USP44	9
BP	GO:0044784	metaphase/anaphase transition of cell cycle	10/771	56/18670	8.64327e-05	0.0123243	0.0118933	CCNB1/CDC20/PLK1/TTK/AURKB/TRIP13/TACC3/CDT1/USP44/CDC26	10
BP	GO:0045841	negative regulation of mitotic metaphase/anaphase transition	8/771	36/18670	8.82276e-05	0.0123243	0.0118933	CCNB1/CDC20/PLK1/TTK/AURKB/TRIP13/CDT1/USP44	8
BP	GO:0007218	neuropeptide signaling pathway	14/771	104/18670	9.4438e-05	0.0127921	0.0123447	GLRB/GPR1/MCHR1/NMB/PYY/SSTR2/TAC3/TYRO3/GLRA3/NXPH4/NXPH3/KISS1R/SORCS1/RXFP4	14
BP	GO:0033047	regulation of mitotic sister chromatid segregation	11/771	68/18670	9.89696e-05	0.0130116	0.0125566	CCNB1/CDC20/PLK1/TTK/AURKB/PTTG1/TRIP13/TACC3/CDT1/USP44/CDC26	11
BP	GO:1902100	negative regulation of metaphase/anaphase transition of cell cycle	8/771	37/18670	0.000108529	0.0138607	0.0133759	CCNB1/CDC20/PLK1/TTK/AURKB/TRIP13/CDT1/USP44	8
BP	GO:0048670	regulation of collateral sprouting	6/771	20/18670	0.000114637	0.0142341	0.0137364	CRABP2/DCC/EFNA5/SPP1/LPAR3/WNT3A	6
BP	GO:0051225	spindle assembly	14/771	108/18670	0.00014256	0.0172228	0.0166205	BIRC5/CDC20/HSPA1A/HSPA1B/KIFC1/MYBL2/NEK2/PLK1/AURKB/MSTO1/LZTS2/MISP/TUBB8/CENPW	14
BP	GO:1904666	regulation of ubiquitin protein ligase activity	6/771	22/18670	0.000205606	0.0241857	0.02334	CDC20/PLK1/BAG2/UBE2C/UBE2S/USP44	6
BP	GO:0030071	regulation of mitotic metaphase/anaphase transition	9/771	51/18670	0.00021339	0.0244578	0.0236025	CCNB1/CDC20/PLK1/TTK/AURKB/TRIP13/CDT1/USP44/CDC26	9
BP	GO:0015698	inorganic anion transport	18/771	169/18670	0.000224149	0.0250487	0.0241728	CA7/CLCNKA/CLIC1/CLDN4/GABRA2/GABRG3/GLRB/P2RY6/FXYD3/PRKG2/SLC4A3/BEST1/BSND/GLRA3/SLC22A6/SLC22A8/TTYH1/SLC26A6	18
BP	GO:0048640	negative regulation of developmental growth	14/771	113/18670	0.000231409	0.0252292	0.024347	DCC/FGFR3/G6PD/MT3/PAK1/RGS2/SPP1/STC2/GDF15/SEMA6C/SEMA3C/PLXNA3/SEMA6A/WNT3A	14
BP	GO:0045839	negative regulation of mitotic nuclear division	9/771	52/18670	0.000248724	0.0261873	0.0252715	CCNB1/CDC20/PLK1/TTK/AURKB/PTTG1/TRIP13/CDT1/USP44	9
BP	GO:0019321	pentose metabolic process	5/771	15/18670	0.000251913	0.0261873	0.0252715	G6PD/PGD/TALDO1/TKT/DHDH	5
BP	GO:1902476	chloride transmembrane transport	12/771	88/18670	0.000259858	0.026386	0.0254633	CLCNKA/CLIC1/CLDN4/GABRA2/GABRG3/GLRB/FXYD3/BEST1/BSND/GLRA3/TTYH1/SLC26A6	12
BP	GO:0048638	regulation of developmental growth	29/771	347/18670	0.000268668	0.026386	0.0254633	CCNB1/CDK1/CRABP2/DBN1/DCC/EFNA5/FGFR3/FOXS1/G6PD/GLI1/MT3/PAK1/RGS2/SPP1/PHLDA2/VIL1/ZP3/RASAL1/STC2/GDF15/RIMS2/SEMA6C/SEMA3C/AGR2/LPAR3/FLVCR1/PLXNA3/SEMA6A/WNT3A	29
BP	GO:0008608	attachment of spindle microtubules to kinetochore	7/771	32/18670	0.000271534	0.026386	0.0254633	CCNB1/NEK2/AURKB/KIF2C/SIRT2/CDT1/NUF2	7
BP	GO:1902099	regulation of metaphase/anaphase transition of cell cycle	9/771	53/18670	0.000288774	0.0274642	0.0265038	CCNB1/CDC20/PLK1/TTK/AURKB/TRIP13/CDT1/USP44/CDC26	9
BP	GO:0000819	sister chromatid segregation	19/771	189/18670	0.000320171	0.0293263	0.0283008	CCNB1/CDC20/KIFC1/NEK2/PLK1/TTK/AURKB/PTTG1/TRIP13/TACC3/KIF2C/SMC1B/MSTO1/NCAPG/CDT1/NUF2/USP44/PSRC1/CDC26	19
BP	GO:0051304	chromosome separation	12/771	90/18670	0.000321474	0.0293263	0.0283008	CCNB1/CDC20/PLK1/TTK/AURKB/PTTG1/TRIP13/TACC3/CDT1/USP44/EME1/CDC26	12
BP	GO:0050808	synapse organization	32/771	408/18670	0.000411825	0.0368171	0.0355296	ACHE/CDC20/COL4A5/CTNND2/DBN1/EFNA5/EPHB3/GABRA2/GLRB/IGF1R/LRP4/PAK3/PFN2/WNT7B/PPFIA2/NDRG1/SRPX2/TREM2/PPP1R9A/PCDHB10/PCDHB9/PCDHB2/PCDHB16/LRFN4/CAMKV/KIRREL3/WNT3A/DNER/SEZ6/SDK1/LHFPL4/UNC13C	32
BP	GO:0033045	regulation of sister chromatid segregation	11/771	80/18670	0.000431857	0.037832	0.036509	CCNB1/CDC20/PLK1/TTK/AURKB/PTTG1/TRIP13/TACC3/CDT1/USP44/CDC26	11
BP	GO:0006977	DNA damage response, signal transduction by p53 class mediator resulting in cell cycle arrest	9/771	56/18670	0.000442106	0.037832	0.036509	CCNB1/CDK1/CDC25C/ARID3A/SFN/MUC1/SOX4/GTSE1/PCBP4	9
BP	GO:0010975	regulation of neuron projection development	37/771	499/18670	0.000448568	0.037832	0.036509	CDC20/CNR1/CNTN1/CRABP2/DBN1/DCC/EFNA5/EPHB3/EPO/LGALS1/LRP4/MT3/NME1/PAK1/PAK3/RGS2/S100A9/SPOCK1/SPP1/RASAL1/RIMS2/SEMA6C/SEMA3C/HECW1/LPAR3/PACSIN1/PLXNA3/PPP1R9A/SEMA6A/ITM2C/LINGO1/WNT3A/SEZ6/GPC2/SDK1/RTN4RL2/FOXO6	37
BP	GO:0010959	regulation of metal ion transport	31/771	394/18670	0.000477564	0.0395317	0.0381493	ADORA1/ADRA2A/ANXA2/CAMK2A/CNTN1/DRD4/EPO/G6PD/MCHR1/GPR35/HRC/KCNC2/KCNG1/P2RY6/FXYD3/TRPC1/TRPC3/BEST1/STC2/HOMER3/HECW1/LPAR3/BPIFA1/TREM2/TESC/DPP10/WNK2/NKAIN1/NETO2/NKAIN4/NKAIN2	31
BP	GO:0072431	signal transduction involved in mitotic G1 DNA damage checkpoint	9/771	57/18670	0.000506065	0.0399438	0.038547	CCNB1/CDK1/CDC25C/ARID3A/SFN/MUC1/SOX4/GTSE1/PCBP4	9
BP	GO:1902400	intracellular signal transduction involved in G1 DNA damage checkpoint	9/771	57/18670	0.000506065	0.0399438	0.038547	CCNB1/CDK1/CDC25C/ARID3A/SFN/MUC1/SOX4/GTSE1/PCBP4	9
BP	GO:0050771	negative regulation of axonogenesis	10/771	69/18670	0.00050935	0.0399438	0.038547	DCC/LRP4/MT3/SPP1/SEMA6C/SEMA3C/PLXNA3/SEMA6A/LINGO1/WNT3A	10
BP	GO:0098813	nuclear chromosome segregation	23/771	262/18670	0.000570022	0.043931	0.0423947	CCNB1/CDC20/KIFC1/NEK2/PLK1/TTK/AURKB/PTTG1/TRIP13/TACC3/KIF2C/SIRT2/SMC1B/MSTO1/NCAPG/FAM83D/CDT1/NUF2/USP44/PSRC1/EME1/CDC26/CCDC36	23
BP	GO:0061387	regulation of extent of cell growth	13/771	110/18670	0.000606323	0.0459367	0.0443303	CRABP2/DBN1/DCC/EFNA5/MT3/PAK1/SPP1/SEMA6C/SEMA3C/LPAR3/PLXNA3/SEMA6A/WNT3A	13
BP	GO:0010771	negative regulation of cell morphogenesis involved in differentiation	12/771	97/18670	0.000643414	0.0466017	0.0449721	DCC/EFNA5/FBLN1/LRP4/MT3/SPP1/SEMA6C/SEMA3C/PLXNA3/SEMA6A/LINGO1/WNT3A	12
BP	GO:0072413	signal transduction involved in mitotic cell cycle checkpoint	9/771	59/18670	0.000656803	0.0466017	0.0449721	CCNB1/CDK1/CDC25C/ARID3A/SFN/MUC1/SOX4/GTSE1/PCBP4	9
BP	GO:1902402	signal transduction involved in mitotic DNA damage checkpoint	9/771	59/18670	0.000656803	0.0466017	0.0449721	CCNB1/CDK1/CDC25C/ARID3A/SFN/MUC1/SOX4/GTSE1/PCBP4	9
BP	GO:1902403	signal transduction involved in mitotic DNA integrity checkpoint	9/771	59/18670	0.000656803	0.0466017	0.0449721	CCNB1/CDK1/CDC25C/ARID3A/SFN/MUC1/SOX4/GTSE1/PCBP4	9
BP	GO:0048668	collateral sprouting	6/771	27/18670	0.000683825	0.0470318	0.0453871	CRABP2/DCC/EFNA5/SPP1/LPAR3/WNT3A	6
BP	GO:0060078	regulation of postsynaptic membrane potential	15/771	140/18670	0.000683908	0.0470318	0.0453871	ADORA1/CHRND/DRD4/GABRA2/GABRG3/GLRB/GRIK1/GRIK2/GRIK4/GLRA3/P2RX6/RIMS2/PPP1R9A/SEZ6/IGSF11	15
BP	GO:0016339	calcium-dependent cell-cell adhesion via plasma membrane cell adhesion molecules	8/771	48/18670	0.000710682	0.0481325	0.0464493	CDH6/CDH16/CDH17/CDH18/PCDHB10/PCDHB9/PCDHB2/PCDHB16	8
BP	GO:0002028	regulation of sodium ion transport	11/771	85/18670	0.000729826	0.0486914	0.0469886	CNTN1/DRD4/FXYD3/HECW1/BPIFA1/TESC/WNK2/NKAIN1/NETO2/NKAIN4/NKAIN2	11
BP	GO:0051784	negative regulation of nuclear division	9/771	60/18670	0.000744878	0.0488859	0.0471764	CCNB1/CDC20/PLK1/TTK/AURKB/PTTG1/TRIP13/CDT1/USP44	9
BP	GO:0048672	positive regulation of collateral sprouting	4/771	11/18670	0.000754615	0.0488859	0.0471764	CRABP2/EFNA5/LPAR3/WNT3A	4
BP	GO:0072401	signal transduction involved in DNA integrity checkpoint	10/771	73/18670	0.000802657	0.0501548	0.0484009	CCNB1/CDK1/CDC25C/ARID3A/SFN/MUC1/PLK1/SOX4/GTSE1/PCBP4	10
BP	GO:0072422	signal transduction involved in DNA damage checkpoint	10/771	73/18670	0.000802657	0.0501548	0.0484009	CCNB1/CDK1/CDC25C/ARID3A/SFN/MUC1/PLK1/SOX4/GTSE1/PCBP4	10
BP	GO:1903046	meiotic cell cycle process	18/771	188/18670	0.000812208	0.0501548	0.0484009	BRDT/CDC20/CDC25A/CDC25C/OVOL1/PLK1/TTK/PTTG1/TRIP13/SIRT2/DDX4/NUF2/MND1/HUS1B/EME1/CCDC36/TUBB8/TEX19	18
BP	GO:0051445	regulation of meiotic cell cycle	8/771	49/18670	0.000819084	0.0501548	0.0484009	CDC20/CDC25A/CDC25C/OVOL1/TTK/TRIP13/SIRT2/CCDC36	8
BP	GO:0072395	signal transduction involved in cell cycle checkpoint	10/771	74/18670	0.000894391	0.0537294	0.0518505	CCNB1/CDK1/CDC25C/ARID3A/SFN/MUC1/PLK1/SOX4/GTSE1/PCBP4	10
BP	GO:0098656	anion transmembrane transport	24/771	288/18670	0.000914112	0.0537294	0.0518505	CLCNKA/CLIC1/CLDN4/FOLR1/GABRA2/GABRG3/GLRB/FXYD3/RGS2/SLC4A3/SLC1A5/SLC1A7/SLC6A8/SLC6A9/BEST1/BSND/GLRA3/SLC25A12/SLC16A3/SLC22A6/SLC7A10/TTYH1/SLC26A6/SLC6A19	24
BP	GO:0071322	cellular response to carbohydrate stimulus	15/771	144/18670	0.000916894	0.0537294	0.0518505	ADCY5/ADRA2A/EFNA5/GPR27/IGF1R/PDX1/KCNJ11/LGALS1/NME1/MAPK13/PTPRN/SOX4/NOX4/SLC26A6/COLEC12	15
BP	GO:1904375	regulation of protein localization to cell periphery	13/771	115/18670	0.00092554	0.0537294	0.0518505	KCNJ11/PLK1/VIL1/SQSTM1/AGR2/ARHGEF16/TREM2/DPP10/WNT3A/SAPCD2/MRAP2/LYPD1/MISP	13
BP	GO:0006865	amino acid transport	15/771	145/18670	0.000984637	0.0564273	0.054454	ADORA1/CLN3/NFKBIE/OCA2/RGS2/SLC1A5/SLC1A7/SLC6A8/SLC6A9/SLC6A11/PPFIA4/PPFIA2/SLC25A12/SLC7A10/SLC6A19	15
BP	GO:0035335	peptidyl-tyrosine dephosphorylation	12/771	102/18670	0.00101116	0.0572135	0.0552128	CDC25A/CDC25C/CDKN3/EYA4/PTPRN/PTPRZ1/MTMR7/PTP4A3/DUSP13/DUSP23/DUSP26/PGP	12
BP	GO:0031571	mitotic G1 DNA damage checkpoint	9/771	63/18670	0.00106839	0.0582738	0.056236	CCNB1/CDK1/CDC25C/ARID3A/SFN/MUC1/SOX4/GTSE1/PCBP4	9
BP	GO:0044819	mitotic G1/S transition checkpoint	9/771	63/18670	0.00106839	0.0582738	0.056236	CCNB1/CDK1/CDC25C/ARID3A/SFN/MUC1/SOX4/GTSE1/PCBP4	9
BP	GO:0007416	synapse assembly	17/771	177/18670	0.00108265	0.0582738	0.056236	ACHE/EFNA5/EPHB3/GABRA2/LRP4/SRPX2/PPP1R9A/PCDHB10/PCDHB9/PCDHB2/PCDHB16/LRFN4/KIRREL3/WNT3A/DNER/SDK1/LHFPL4	17
BP	GO:0007077	mitotic nuclear envelope disassembly	4/771	12/18670	0.00109508	0.0582738	0.056236	CCNB1/CDK1/PLK1/CCNB2	4
BP	GO:1904668	positive regulation of ubiquitin protein ligase activity	4/771	12/18670	0.00109508	0.0582738	0.056236	CDC20/PLK1/UBE2C/UBE2S	4
BP	GO:0044783	G1 DNA damage checkpoint	9/771	64/18670	0.00119852	0.062362	0.0601812	CCNB1/CDK1/CDC25C/ARID3A/SFN/MUC1/SOX4/GTSE1/PCBP4	9
BP	GO:0035107	appendage morphogenesis	15/771	148/18670	0.00121376	0.062362	0.0601812	ALX3/CRABP2/FGF4/GPC3/HOXA9/HOXA11/LRP4/PCSK5/PITX1/SOX4/TFAP2A/SEMA3C/FLVCR1/FRAS1/OSR2	15
BP	GO:0035108	limb morphogenesis	15/771	148/18670	0.00121376	0.062362	0.0601812	ALX3/CRABP2/FGF4/GPC3/HOXA9/HOXA11/LRP4/PCSK5/PITX1/SOX4/TFAP2A/SEMA3C/FLVCR1/FRAS1/OSR2	15
BP	GO:0071459	protein localization to chromosome, centromeric region	5/771	21/18670	0.00138908	0.0705591	0.0680916	CDK1/CENPA/TTK/AURKB/CDT1	5
BP	GO:1904029	regulation of cyclin-dependent protein kinase activity	12/771	106/18670	0.00141835	0.0712363	0.0687452	CCNB1/CDC25A/CDC25C/CDKN1C/CDKN3/SFN/HSP90AB1/PLK1/CCNB2/CCNJL/PSRC1/STOX1	12
BP	GO:0006703	estrogen biosynthetic process	4/771	13/18670	0.00153037	0.0760084	0.0733503	CYP19A1/RDH8/HSD17B14/AKR1B15	4
BP	GO:0050770	regulation of axonogenesis	17/771	183/18670	0.00155939	0.0765987	0.0739201	CRABP2/DBN1/DCC/EFNA5/EPHB3/LRP4/MT3/PAK1/PAK3/SPP1/SEMA6C/SEMA3C/LPAR3/PLXNA3/SEMA6A/LINGO1/WNT3A	17
BP	GO:0000075	cell cycle checkpoint	19/771	216/18670	0.0016208	0.0787497	0.0759958	CCNB1/CDK1/CDC20/CDC25C/ARID3A/SFN/MUC1/PLK1/SOX4/TTK/AURKB/TRIP13/MAD2L1BP/GTSE1/PCBP4/CDT1/USP44/HUS1B/EME1	19
BP	GO:0006739	NADP metabolic process	6/771	32/18670	0.00175631	0.0844163	0.0814643	G6PD/ME1/PGD/TALDO1/TKT/NUDT17	6
BP	GO:1903078	positive regulation of protein localization to plasma membrane	8/771	56/18670	0.00200243	0.095222	0.0918921	KCNJ11/VIL1/SQSTM1/AGR2/ARHGEF16/TREM2/DPP10/WNT3A	8
BP	GO:0035115	embryonic forelimb morphogenesis	6/771	33/18670	0.00207272	0.0975269	0.0941164	ALX3/CRABP2/HOXA9/HOXA11/TFAP2A/OSR2	6
BP	GO:0098661	inorganic anion transmembrane transport	12/771	111/18670	0.00210878	0.0981899	0.0947562	CLCNKA/CLIC1/CLDN4/GABRA2/GABRG3/GLRB/FXYD3/BEST1/BSND/GLRA3/TTYH1/SLC26A6	12
CC	GO:0000779	condensed chromosome, centromeric region	18/813	118/19717	1.59769e-06	0.000832398	0.000745029	BIRC5/CCNB1/CENPA/NEK2/PLK1/AURKB/KIF2C/HJURP/SPC25/NCAPG/CENPM/CENPO/CDT1/NUF2/SPC24/SKA1/SKA3/CENPW	18
CC	GO:0000777	condensed chromosome kinetochore	16/813	105/19717	6.09039e-06	0.00158655	0.00142002	BIRC5/CCNB1/CENPA/NEK2/PLK1/KIF2C/HJURP/SPC25/CENPM/CENPO/CDT1/NUF2/SPC24/SKA1/SKA3/CENPW	16
CC	GO:0000776	kinetochore	18/813	135/19717	1.11918e-05	0.00194364	0.00173963	BIRC5/CCNB1/CENPA/NEK2/PLK1/TTK/AURKB/KIF2C/HJURP/SPC25/CENPM/CENPO/CDT1/NUF2/SPC24/SKA1/SKA3/CENPW	18
CC	GO:0034707	chloride channel complex	10/813	50/19717	3.08453e-05	0.0040176	0.00359592	CLCNKA/CLIC1/CLDN4/GABRA2/GABRG3/GLRB/BEST1/GLRA3/TTYH1/SLC26A6	10
CC	GO:0005903	brush border	14/813	99/19717	5.38802e-05	0.00561432	0.00502504	CLIC1/FOLR1/HSP90AB1/MYO1A/MYO7B/SLC15A1/VIL1/SOAT2/USH1C/MFSD10/SLC26A6/PDZD3/SCIN/SLC6A19	14
CC	GO:0016323	basolateral plasma membrane	22/813	217/19717	9.70536e-05	0.00842749	0.00754294	ADORA1/ADRA2A/ANXA2/CA9/CDH16/CDH17/CLDN4/FOLR1/HSP90AB1/KCNC2/EPCAM/MPZ/MYO1A/P2RY6/BEST1/BSND/SLC22A6/SLC22A8/ABCC4/SLC26A6/ALPK2/MUC20	22
CC	GO:0005874	microtubule	34/813	416/19717	0.000124639	0.00853048	0.00763512	BIRC5/CAPN6/CDK1/DNM1/KIF5A/KIFC1/MT3/NEK2/PLK1/SCTR/CCT3/TUBA3C/AURKB/BAG2/NDRG1/KIF2C/SIRT2/DNAI1/REEP2/DCDC2/GTSE1/DNAH3/BEX4/TUBAL3/LZTS2/PSRC1/MISP/KLC3/DNAH10/SKA1/SKA3/GAS2L3/DCDC1/TUBB8	34
CC	GO:0000793	condensed chromosome	22/813	223/19717	0.000144573	0.00853048	0.00763512	BIRC5/CCNB1/CENPA/NEK2/PLK1/AURKB/KIF2C/SMC1B/HJURP/SPC25/NCAPG/CENPM/CENPO/CDT1/NUF2/RSPH1/HUS1B/SPC24/SKA1/SKA3/CCDC36/CENPW	22
CC	GO:0000775	chromosome, centromeric region	20/813	193/19717	0.00014736	0.00853048	0.00763512	BIRC5/CCNB1/CENPA/NEK2/PLK1/TTK/AURKB/KIF2C/SMC1B/HJURP/SPC25/NCAPG/CENPM/CENPO/CDT1/NUF2/SPC24/SKA1/SKA3/CENPW	20
CC	GO:0014069	postsynaptic density	28/813	324/19717	0.000193273	0.00943838	0.00844773	ADORA1/CAMK2A/CRYAB/CTNND2/DBN1/DCC/DNM1/GRIK2/LRP4/MT3/PAK3/RPL8/SLC6A9/SPOCK1/SYN3/NCK2/BCAS1/SLC16A3/P2RX6/HOMER3/PPP1R9A/CPEB1/LRFN4/PRR7/NETO2/DTNBP1/IGSF11/SH2D5	28
CC	GO:0005581	collagen trimer	12/813	87/19717	0.000230338	0.00943838	0.00844773	COL4A5/COL4A6/COL9A2/COLEC11/COLEC12/C1QTNF2/CTHRC1/EMID1/COL22A1/COL24A1/COL28A1/GLDN	12
CC	GO:0032279	asymmetric synapse	28/813	328/19717	0.000236761	0.00943838	0.00844773	ADORA1/CAMK2A/CRYAB/CTNND2/DBN1/DCC/DNM1/GRIK2/LRP4/MT3/PAK3/RPL8/SLC6A9/SPOCK1/SYN3/NCK2/BCAS1/SLC16A3/P2RX6/HOMER3/PPP1R9A/CPEB1/LRFN4/PRR7/NETO2/DTNBP1/IGSF11/SH2D5	28
CC	GO:0000778	condensed nuclear chromosome kinetochore	5/813	15/19717	0.000250272	0.00943838	0.00844773	CCNB1/CENPA/PLK1/CENPO/NUF2	5
CC	GO:0097060	synaptic membrane	34/813	432/19717	0.000253623	0.00943838	0.00844773	ADORA1/CAMK2A/CHRND/CNR1/CNTN1/CRYAB/DBN1/DCC/DNM1/GABRA2/GABRG3/GLRB/GRIK1/GRIK2/GRIK4/KCNC2/LRP4/SLC6A9/SLC6A11/GLRA3/ADAM23/SLC16A3/P2RX6/HOMER3/RIMS2/DDN/SRPX2/CPEB1/LRFN4/PRR7/DTNBP1/LHFPL4/SH2D5/UNC13C	34
CC	GO:0099572	postsynaptic specialization	29/813	348/19717	0.000277109	0.00962492	0.00861468	ADORA1/CAMK2A/CHRND/CRYAB/CTNND2/DBN1/DCC/DNM1/GRIK2/LRP4/MT3/PAK3/RPL8/SLC6A9/SPOCK1/SYN3/NCK2/BCAS1/SLC16A3/P2RX6/HOMER3/PPP1R9A/CPEB1/LRFN4/PRR7/NETO2/DTNBP1/IGSF11/SH2D5	29
CC	GO:0098984	neuron to neuron synapse	29/813	350/19717	0.000304836	0.00992622	0.00888437	ADORA1/CAMK2A/CRYAB/CTNND2/DBN1/DCC/DNM1/GRIK2/GRIK4/LRP4/MT3/PAK3/RPL8/SLC6A9/SPOCK1/SYN3/NCK2/BCAS1/SLC16A3/P2RX6/HOMER3/PPP1R9A/CPEB1/LRFN4/PRR7/NETO2/DTNBP1/IGSF11/SH2D5	29
CC	GO:0098862	cluster of actin-based cell projections	16/813	150/19717	0.000476615	0.0142468	0.0127514	CLIC1/FOLR1/HSP90AB1/MYO1A/MYO7B/SLC15A1/VIL1/SOAT2/USH1C/MFSD10/CIB2/DCDC2/SLC26A6/PDZD3/SCIN/SLC6A19	16
CC	GO:0005604	basement membrane	12/813	95/19717	0.000525782	0.0142468	0.0127514	ACHE/ANXA2/COL4A5/COL4A6/COL9A2/EFNA5/FBLN1/LAD1/EGFL6/TINAG/FRAS1/COL28A1	12
CC	GO:0031253	cell projection membrane	28/813	345/19717	0.000534226	0.0142468	0.0127514	ADORA1/CA9/FOLR1/GABRA2/GABRG3/GNAT1/MCHR1/GUCY2D/HSP90AB1/KCNC2/KCNJ11/MYO10/NME1/PAK1/PDE6A/PDE9A/S100P/SGCE/MFSD10/DDN/PACSIN1/EPS8L1/TESC/TTYH1/SLC26A6/EPS8L3/MUC20/SLC6A19	28
CC	GO:0000780	condensed nuclear chromosome, centromeric region	6/813	26/19717	0.000546901	0.0142468	0.0127514	CCNB1/CENPA/PLK1/AURKB/CENPO/NUF2	6
CC	GO:0005876	spindle microtubule	9/813	59/19717	0.000650596	0.0160884	0.0143997	BIRC5/CAPN6/CDK1/PLK1/AURKB/PSRC1/MISP/SKA1/SKA3	9
CC	GO:0031225	anchored component of membrane	17/813	170/19717	0.000679355	0.0160884	0.0143997	ACHE/ART3/CNTN1/EFNA3/EFNA5/FOLR1/GPC3/GP2/LY6H/MMP17/RAB3C/LYPD1/LYPD6/GPC2/RTN4RL2/LYPD8/CD24	17
CC	GO:0034702	ion channel complex	25/813	301/19717	0.000745711	0.0167889	0.0150267	CHRND/CLCNKA/CLIC1/CLDN4/GABRA2/GABRG3/GLRB/GRIK1/GRIK2/GRIK4/KCNC2/KCNF1/KCNG1/KCNJ11/TRPC1/TRPC3/BEST1/GLRA3/KCNMB4/TTYH1/DPP10/SLC26A6/CATSPERB/OLFM3/HCN1	25
CC	GO:0062023	collagen-containing extracellular matrix	31/813	406/19717	0.000773384	0.0167889	0.0150267	ACHE/ANXA2/SERPINH1/COL4A5/COL4A6/COL9A2/EFNA5/FBLN1/GDF10/GPC3/LAD1/LGALS1/MGP/PKM/PRTN3/PTPRZ1/S100A6/S100A9/S100A10/ZP3/GDF15/EGFL6/TINAG/SRPX2/ADAMTS20/FRAS1/ITIH5/CTHRC1/GPC2/COL24A1/COL28A1	31
CC	GO:0045211	postsynaptic membrane	26/813	323/19717	0.000936824	0.0195234	0.0174742	ADORA1/CAMK2A/CHRND/CNTN1/DBN1/DCC/DNM1/GABRA2/GABRG3/GLRB/GRIK1/GRIK2/GRIK4/KCNC2/SLC6A9/SLC6A11/GLRA3/SLC16A3/P2RX6/HOMER3/CPEB1/LRFN4/PRR7/DTNBP1/LHFPL4/SH2D5	26
CC	GO:0000940	condensed chromosome outer kinetochore	4/813	14/19717	0.00206209	0.0401533	0.0359388	CCNB1/PLK1/SKA1/SKA3	4
CC	GO:1902495	transmembrane transporter complex	25/813	324/19717	0.00208088	0.0401533	0.0359388	CHRND/CLCNKA/CLIC1/CLDN4/GABRA2/GABRG3/GLRB/GRIK1/GRIK2/GRIK4/KCNC2/KCNF1/KCNG1/KCNJ11/TRPC1/TRPC3/BEST1/GLRA3/KCNMB4/TTYH1/DPP10/SLC26A6/CATSPERB/OLFM3/HCN1	25
CC	GO:0000794	condensed nuclear chromosome	11/813	99/19717	0.00253751	0.0461281	0.0412865	CCNB1/CENPA/NEK2/PLK1/AURKB/SMC1B/CENPO/NUF2/RSPH1/HUS1B/CCDC36	11
CC	GO:0005819	spindle	26/813	347/19717	0.00256759	0.0461281	0.0412865	BIRC5/CAPN6/CCNB1/CDK1/CDC20/HSPB1/KIFC1/NEK2/PLK1/TTK/AURKB/MAD2L1BP/TACC3/SIRT2/DCDC2/BEX4/FAM83D/PSRC1/RSPH1/MISP/SKA1/SKA3/WDR62/DCDC1/TUBB8/KPNA7	26
CC	GO:1990351	transporter complex	25/813	332/19717	0.00287861	0.0499918	0.0447447	CHRND/CLCNKA/CLIC1/CLDN4/GABRA2/GABRG3/GLRB/GRIK1/GRIK2/GRIK4/KCNC2/KCNF1/KCNG1/KCNJ11/TRPC1/TRPC3/BEST1/GLRA3/KCNMB4/TTYH1/DPP10/SLC26A6/CATSPERB/OLFM3/HCN1	25
CC	GO:0005796	Golgi lumen	11/813	102/19717	0.00320972	0.053944	0.0482821	GPC3/MMP11/MUC1/PCSK5/WNT7B/PODXL2/MUC13/WNT3A/MUC20/GPC2/MUC5B	11
CC	GO:0098688	parallel fiber to Purkinje cell synapse	4/813	16/19717	0.00351067	0.0571581	0.0511588	SLC6A9/SLC16A3/P2RX6/UNC13C	4
CC	GO:0044449	contractile fiber part	18/813	221/19717	0.00476077	0.0730568	0.0653887	ALDOA/CRYAB/ENO1/FLNC/HRC/HSPB1/MYH4/MYL3/PAK1/TNNC1/TNNI2/TPM2/MYH13/SQSTM1/PDLIM7/PDLIM3/OBSCN/MYO18B	18
CC	GO:0030017	sarcomere	17/813	204/19717	0.00476762	0.0730568	0.0653887	ALDOA/CRYAB/ENO1/FLNC/HRC/HSPB1/MYH4/MYL3/PAK1/TNNC1/TNNI2/TPM2/SQSTM1/PDLIM7/PDLIM3/OBSCN/MYO18B	17
CC	GO:0030016	myofibril	18/813	224/19717	0.00546835	0.0814003	0.0728565	ALDOA/CRYAB/ENO1/FLNC/HRC/HSPB1/MYH4/MYL3/PAK1/TNNC1/TNNI2/TPM2/MYH13/SQSTM1/PDLIM7/PDLIM3/OBSCN/MYO18B	18
CC	GO:0034705	potassium channel complex	10/813	96/19717	0.00619587	0.0896681	0.0802565	GRIK1/GRIK2/GRIK4/KCNC2/KCNF1/KCNG1/KCNJ11/KCNMB4/DPP10/HCN1	10
MF	GO:0005254	chloride channel activity	12/770	75/17697	8.86343e-05	0.0643579	0.0603472	CLCNKA/CLIC1/CLDN4/GABRA2/GABRG3/GLRB/FXYD3/BEST1/BSND/GLRA3/TTYH1/SLC26A6	12
MF	GO:0008509	anion transmembrane transporter activity	29/770	327/17697	0.000233807	0.0643579	0.0603472	CLCNKA/CLIC1/CLDN4/GABRA2/GABRG3/GLRB/OCA2/FXYD3/SLC4A3/SLC1A5/SLC1A7/SLC6A8/SLC6A9/SLC6A11/BEST1/BSND/GLRA3/SLC25A12/SLC16A3/SLC22A6/SLC22A8/MFSD10/SLC7A10/TTYH1/SLC26A6/SLC52A2/SLC52A3/SLC16A14/SLC6A19	29
MF	GO:0001664	G protein-coupled receptor binding	26/770	280/17697	0.0002369	0.0643579	0.0603472	ADORA1/ADRA2A/DNM1/GNAT1/GNAZ/HSPA1A/HSPA1B/KISS1/NMB/PYY/CCL20/TUB/UCHL1/WNT7B/HOMER3/CCL26/BAMBI/CKLF/REEP2/CCL28/S100A14/PPP1R1B/WNT3A/MRAP2/CTHRC1/RLN3	26
MF	GO:0005253	anion channel activity	12/770	89/17697	0.000462191	0.0941714	0.0883028	CLCNKA/CLIC1/CLDN4/GABRA2/GABRG3/GLRB/FXYD3/BEST1/BSND/GLRA3/TTYH1/SLC26A6	12
KEGG	hsa04914	Progesterone-mediated oocyte maturation	13/337	100/8076	0.000245708	0.0382695	0.0379685	ADCY5/CCNB1/CDK1/CDC25A/CDC25C/HSP90AB1/IGF1R/PLK1/MAPK13/MAPK12/CCNB2/CPEB1/CDC26	13
KEGG	hsa04114	Oocyte meiosis	15/337	129/8076	0.000293253	0.0382695	0.0379685	ADCY5/CAMK2A/CCNB1/CDK1/CDC20/CDC25C/IGF1R/PLK1/MAPK13/MAPK12/CCNB2/PTTG1/SMC1B/CPEB1/CDC26	15
KEGG	hsa04080	Neuroactive ligand-receptor interaction	28/337	341/8076	0.000445253	0.038737	0.0384324	ADORA1/ADRA2A/CHRND/CNR1/DRD4/GABRA2/GABRG3/GLRB/MCHR1/GPR35/GRIK1/GRIK2/GRIK4/KISS1/NMB/P2RY6/PYY/PTH2R/SCTR/SSTR2/TAC3/GLRA3/P2RX6/LPAR3/KISS1R/RLN3/GPR156/RXFP4	28
