# Supplementary material for: Multi-View Radiomics Feature Fusion Reveals Distinct Immuno-Oncological Characteristics and Clinical Prognoses in Hepatocellular Carcinoma
Source: Cancers (Basel). 2023 Apr 17;15(8):2338. doi: 10.3390/cancers15082338 (PMC10137067; doi:10.3390/cancers15082338)
Supplement: Supplementary file 1 [file cancers-15-02338-s001.zip › Table S5.xlsx]

## Sheet: green
ONTOLOGY	ID	Description	GeneRatio	BgRatio	pvalue	p.adjust	qvalue	geneID	Count
BP	GO:0042110	T cell activation	68/357	464/18670	1.72632e-40	6.00587e-37	0	RHOH/CAMK4/RUNX2/RUNX1/RUNX3/CD1C/CD2/CD3D/CD3E/CD3G/CD5/CD6/CD8A/CD8B/CD27/CD80/TNFSF8/CD40LG/CD70/CCR7/CTLA4/CD55/FUT7/GATA3/ICAM1/IFNG/IL7R/IL12B/IRF4/ITK/JAK3/LAG3/LCK/MSN/PDCD1/PIK3CG/PRKCQ/CCL5/CCL19/VCAM1/WNT1/ZAP70/TNFRSF18/TESPA1/RASGRP1/SIRPB1/KLRK1/PTPN22/CLEC4E/PLA2G2D/SIT1/ICOS/TBX21/LAX1/SIRPG/CYP26B1/PREX1/TREML2/PDCD1LG2/DOCK8/SLAMF6/TNFRSF13C/BTLA/TIGIT/ZNF683/THEMIS/CCR2/KLRC4-K…	68
BP	GO:0051249	regulation of lymphocyte activation	61/357	485/18670	2.13873e-32	3.72031e-29	2.98296e-29	CAMK4/RUNX1/RUNX3/CD2/CD3E/CD5/CD6/CD19/CD22/CD27/CD80/TNFSF8/CD38/CD40LG/CD70/CCR7/CTLA4/CD55/GATA3/IFNG/IL7R/IL12B/IRF4/JAK3/LAG3/LCK/PDCD1/PRKCQ/CCL5/CCL19/VCAM1/ZAP70/TNFRSF18/TOX/TESPA1/RASGRP1/SIRPB1/IKZF3/KLRK1/TNFRSF13B/PTPN22/PLA2G2D/SIT1/ICOS/TBX21/MZB1/LAX1/BANK1/SIRPG/CYP26B1/SLAMF8/PDCD1LG2/DOCK8/FCRL3/TNFRSF13C/BTLA/TIGIT/ZNF683/CCR2/IGLL5/KLRC4-KLRK1	61
BP	GO:0030098	lymphocyte differentiation	53/357	353/18670	4.81486e-32	5.58364e-29	4.47698e-29	RHOH/CAMK4/RUNX2/RUNX1/RUNX3/CD2/CD3D/CD3E/CD3G/CD8A/CD19/MS4A1/CD27/CD80/TNFSF8/CD40LG/CD79A/CCR7/CR2/CTLA4/FUT7/GATA3/IFNG/IL7R/IL12B/IRF4/ITGA4/ITK/JAK3/LAG3/LCK/CCL19/VCAM1/WNT1/ZAP70/TNFRSF18/ITM2A/TOX/TESPA1/RASGRP1/IKZF3/PTPN22/CLEC4E/PLA2G2D/TBX21/CYP26B1/SLAMF8/PREX1/SLAMF6/FCRL3/ZNF683/THEMIS/CCR2	53
BP	GO:0050863	regulation of T cell activation	50/357	314/18670	1.70924e-31	1.48661e-28	1.19197e-28	CAMK4/RUNX1/RUNX3/CD2/CD3E/CD5/CD6/CD27/CD80/TNFSF8/CD40LG/CD70/CCR7/CTLA4/CD55/GATA3/IFNG/IL7R/IL12B/IRF4/JAK3/LAG3/LCK/PDCD1/PRKCQ/CCL5/CCL19/VCAM1/ZAP70/TNFRSF18/TESPA1/RASGRP1/SIRPB1/KLRK1/PTPN22/PLA2G2D/SIT1/ICOS/TBX21/LAX1/SIRPG/CYP26B1/PDCD1LG2/DOCK8/TNFRSF13C/BTLA/TIGIT/ZNF683/CCR2/KLRC4-KLRK1	50
BP	GO:0030217	T cell differentiation	41/357	240/18670	3.66341e-27	2.549e-24	2.0438e-24	RHOH/CAMK4/RUNX2/RUNX1/RUNX3/CD2/CD3D/CD3E/CD3G/CD8A/CD27/CD80/TNFSF8/CCR7/CTLA4/FUT7/GATA3/IFNG/IL7R/IL12B/IRF4/ITK/JAK3/LAG3/LCK/CCL19/WNT1/ZAP70/TNFRSF18/TESPA1/RASGRP1/PTPN22/CLEC4E/PLA2G2D/TBX21/CYP26B1/PREX1/SLAMF6/ZNF683/THEMIS/CCR2	41
BP	GO:0007159	leukocyte cell-cell adhesion	47/357	337/18670	5.26247e-27	2.6518e-24	2.12622e-24	ADD2/RUNX1/RUNX3/CD3E/CD5/CD6/CD27/CD80/CD40LG/CD70/CCR7/CTLA4/CD55/GATA3/ICAM1/IFNG/IL7R/IL12B/ITGA4/JAK3/LAG3/LCK/MSN/PDCD1/PRKCQ/CCL5/CCL19/CXCL12/VCAM1/ZAP70/TESPA1/RASGRP1/SIRPB1/KLRK1/PTPN22/PLA2G2D/ICOS/TBX21/LAX1/SIRPG/PDCD1LG2/DOCK8/TNFRSF13C/BTLA/TIGIT/CCR2/KLRC4-KLRK1	47
BP	GO:1903037	regulation of leukocyte cell-cell adhesion	45/357	304/18670	5.33562e-27	2.6518e-24	2.12622e-24	RUNX1/RUNX3/CD3E/CD5/CD6/CD27/CD80/CD40LG/CD70/CCR7/CTLA4/CD55/GATA3/ICAM1/IFNG/IL7R/IL12B/ITGA4/JAK3/LAG3/LCK/PDCD1/PRKCQ/CCL5/CCL19/CXCL12/VCAM1/ZAP70/TESPA1/RASGRP1/SIRPB1/KLRK1/PTPN22/PLA2G2D/ICOS/TBX21/LAX1/SIRPG/PDCD1LG2/DOCK8/TNFRSF13C/BTLA/TIGIT/CCR2/KLRC4-KLRK1	45
BP	GO:1903039	positive regulation of leukocyte cell-cell adhesion	38/357	218/18670	1.45156e-25	6.31246e-23	5.06135e-23	RUNX1/RUNX3/CD3E/CD5/CD6/CD27/CD80/CD40LG/CD70/CCR7/CTLA4/CD55/GATA3/ICAM1/IFNG/IL7R/IL12B/ITGA4/JAK3/LCK/PDCD1/PRKCQ/CCL5/CCL19/VCAM1/ZAP70/TESPA1/RASGRP1/SIRPB1/KLRK1/ICOS/SIRPG/PDCD1LG2/DOCK8/TNFRSF13C/BTLA/CCR2/KLRC4-KLRK1	38
BP	GO:0022407	regulation of cell-cell adhesion	49/357	403/18670	2.20403e-25	8.51979e-23	6.83119e-23	RUNX1/RUNX3/CD3E/CD5/CD6/CD27/CD80/CD40LG/CD70/CCR7/CTLA4/CD55/GATA3/ICAM1/IFNG/IL7R/IL12B/ITGA4/JAK3/LAG3/LCK/PDCD1/PRKCQ/CCL5/CCL19/CXCL12/VCAM1/WNT1/ZAP70/TESPA1/RASGRP1/SIRPB1/CXCL13/KLRK1/PTPN22/PLA2G2D/ICOS/TBX21/LAX1/KIF26B/SIRPG/TRPV4/PDCD1LG2/DOCK8/TNFRSF13C/BTLA/TIGIT/CCR2/KLRC4-KLRK1	49
BP	GO:0022409	positive regulation of cell-cell adhesion	40/357	255/18670	4.67859e-25	1.62768e-22	1.30508e-22	RUNX1/RUNX3/CD3E/CD5/CD6/CD27/CD80/CD40LG/CD70/CCR7/CTLA4/CD55/GATA3/ICAM1/IFNG/IL7R/IL12B/ITGA4/JAK3/LCK/PDCD1/PRKCQ/CCL5/CCL19/VCAM1/ZAP70/TESPA1/RASGRP1/SIRPB1/CXCL13/KLRK1/ICOS/KIF26B/SIRPG/PDCD1LG2/DOCK8/TNFRSF13C/BTLA/CCR2/KLRC4-KLRK1	40
BP	GO:0050867	positive regulation of cell activation	48/357	394/18670	6.50372e-25	2.05695e-22	1.64927e-22	RUNX1/RUNX3/CD2/CD3E/CD5/CD6/CD27/CD80/CD38/CD40LG/CD70/CCR7/CTLA4/CD55/GATA3/IFNG/IL7R/IL12B/JAK3/LCK/PDCD1/PLEK/PRKCQ/CCL3/CCL5/CCL19/VCAM1/ZAP70/TOX/TESPA1/RASGRP1/SIRPB1/TLR6/CD226/KLRK1/STAP1/ICOS/TBX21/SIRPG/CRLF2/PDCD1LG2/DOCK8/FCRL3/TNFRSF13C/BTLA/CCR2/IGLL5/KLRC4-KLRK1	48
BP	GO:0002696	positive regulation of leukocyte activation	47/357	380/18670	1.08143e-24	3.13526e-22	2.51386e-22	RUNX1/RUNX3/CD2/CD3E/CD5/CD6/CD27/CD80/CD38/CD40LG/CD70/CCR7/CTLA4/CD55/GATA3/IFNG/IL7R/IL12B/JAK3/LCK/PDCD1/PRKCQ/CCL3/CCL5/CCL19/VCAM1/ZAP70/TOX/TESPA1/RASGRP1/SIRPB1/TLR6/CD226/KLRK1/STAP1/ICOS/TBX21/SIRPG/CRLF2/PDCD1LG2/DOCK8/FCRL3/TNFRSF13C/BTLA/CCR2/IGLL5/KLRC4-KLRK1	47
BP	GO:0050870	positive regulation of T cell activation	36/357	202/18670	1.30103e-24	3.48176e-22	2.79169e-22	RUNX1/RUNX3/CD3E/CD5/CD6/CD27/CD80/CD40LG/CD70/CCR7/CTLA4/CD55/GATA3/IFNG/IL7R/IL12B/JAK3/LCK/PDCD1/PRKCQ/CCL5/CCL19/VCAM1/ZAP70/TESPA1/RASGRP1/SIRPB1/KLRK1/ICOS/SIRPG/PDCD1LG2/DOCK8/TNFRSF13C/BTLA/CCR2/KLRC4-KLRK1	36
BP	GO:0072676	lymphocyte migration	28/357	111/18670	9.22652e-24	2.29279e-21	1.83837e-21	CCR7/GATA3/CXCR3/ICAM1/CXCL10/ITGA4/MSN/PIK3CG/CCL3/CCL4/CCL5/CCL18/CCL19/CCL22/CCL24/CXCL11/CXCL12/ZAP70/CXCL14/CXCL13/KLRK1/TBX21/DOCK8/GCSAM/CCL4L1/CCL3L3/CCR2/KLRC4-KLRK1	28
BP	GO:1990868	response to chemokine	25/357	97/18670	1.36925e-21	2.97727e-19	2.38718e-19	CCR1/CCR4/CCR5/CCR7/CCR8/ACKR1/XCR1/CXCR3/CXCL10/CXCL9/CCL3/CCL4/CCL5/CCL18/CCL19/CCL22/CCL24/CXCL11/CXCL12/CXCL13/CXCR6/DOCK8/CCL4L1/CCL3L3/CCR2	25
BP	GO:1990869	cellular response to chemokine	25/357	97/18670	1.36925e-21	2.97727e-19	2.38718e-19	CCR1/CCR4/CCR5/CCR7/CCR8/ACKR1/XCR1/CXCR3/CXCL10/CXCL9/CCL3/CCL4/CCL5/CCL18/CCL19/CCL22/CCL24/CXCL11/CXCL12/CXCL13/CXCR6/DOCK8/CCL4L1/CCL3L3/CCR2	25
BP	GO:0051251	positive regulation of lymphocyte activation	41/357	334/18670	1.67133e-21	3.42034e-19	2.74244e-19	RUNX1/RUNX3/CD3E/CD5/CD6/CD27/CD80/CD38/CD40LG/CD70/CCR7/CTLA4/CD55/GATA3/IFNG/IL7R/IL12B/JAK3/LCK/PDCD1/PRKCQ/CCL5/CCL19/VCAM1/ZAP70/TOX/TESPA1/RASGRP1/SIRPB1/KLRK1/ICOS/TBX21/SIRPG/PDCD1LG2/DOCK8/FCRL3/TNFRSF13C/BTLA/CCR2/IGLL5/KLRC4-KLRK1	41
BP	GO:0070098	chemokine-mediated signaling pathway	24/357	88/18670	2.04544e-21	3.95338e-19	3.16983e-19	CCR1/CCR4/CCR5/CCR7/CCR8/ACKR1/XCR1/CXCR3/CXCL10/CXCL9/CCL3/CCL4/CCL5/CCL18/CCL19/CCL22/CCL24/CXCL11/CXCL12/CXCL13/CXCR6/CCL4L1/CCL3L3/CCR2	24
BP	GO:0045785	positive regulation of cell adhesion	44/357	403/18670	5.69516e-21	1.04281e-18	8.36131e-19	RUNX1/RUNX3/CD3E/CD5/CD6/CD27/CD80/CD40LG/CD70/CCR7/CTLA4/CD55/GATA3/ICAM1/IFNG/IL7R/IL12B/ITGA4/JAK3/LCK/PDCD1/PRKCQ/CCL5/CCL19/CXCL12/VCAM1/ZAP70/TNFRSF18/TESPA1/RASGRP1/SIRPB1/CXCL13/KLRK1/ICOS/KIF26B/SIRPG/PREX1/P2RY12/PDCD1LG2/DOCK8/TNFRSF13C/BTLA/CCR2/KLRC4-KLRK1	44
BP	GO:0050900	leukocyte migration	48/357	499/18670	1.8171e-20	3.16084e-18	2.53437e-18	ADD2/CD2/CEACAM3/CCR1/CCR5/CCR7/FPR2/FUT7/GATA3/CXCR3/ICAM1/CXCL10/ITGA4/LCK/CXCL9/MSN/PIK3CG/CCL3/CCL4/CCL5/CCL18/CCL19/CCL22/CCL24/CXCL11/CXCL12/VCAM1/ZAP70/TNFRSF18/CXCL14/CXCL13/KLRK1/STAP1/TBX21/CD244/SIRPG/SMPD3/SLAMF8/PREX1/TRPV4/P2RY12/DOCK8/FCAMR/GCSAM/CCL4L1/CCL3L3/CCR2/KLRC4-KLRK1	48
BP	GO:0001819	positive regulation of cytokine production	45/357	464/18670	2.27443e-19	3.76798e-17	3.02118e-17	BIRC3/RUNX1/CD2/CD3E/CD6/CD80/TNFRSF8/CD40LG/CCR7/FCN1/GATA3/IRF8/IFI16/IFNG/IL12B/IRF4/KIR2DL4/LTB/PRKCQ/CCL3/CCL19/STAT1/TLR2/RASGRP1/TLR6/CD226/KLRK1/PTPN22/CLEC4E/TLR8/CD244/NLRP2/CRTAM/TRPV4/CRLF2/ZBP1/SLAMF6/GBP5/TNFRSF13C/PYHIN1/NLRP7/TIGIT/CLEC9A/CCR2/KLRC4-KLRK1	45
BP	GO:0031341	regulation of cell killing	23/357	98/18670	5.87972e-19	9.29797e-17	7.45514e-17	CD1B/CD1C/CD1E/CD55/CFH/ICAM1/IFNG/IL7R/IL12B/KIR2DL4/LAG3/SH2D1A/PRF1/IL18RAP/RASGRP1/CD226/KLRK1/STAP1/CRTAM/ULBP1/SLAMF6/NCR3/KLRC4-KLRK1	23
BP	GO:0046651	lymphocyte proliferation	34/357	272/18670	3.07134e-18	4.64573e-16	3.72496e-16	CD3E/CD6/CD19/MS4A1/CD22/CD80/TNFSF8/CD38/CD40LG/CD70/CD79A/CR2/CTLA4/CD55/IL7R/IL12B/JAK3/MSN/PIK3CG/PRKCQ/CCL5/CCL19/VCAM1/ZAP70/IKZF3/TNFRSF13B/PTPN22/PLA2G2D/MZB1/PDCD1LG2/DOCK8/FCRL3/TNFRSF13C/CCR2	34
BP	GO:0032943	mononuclear cell proliferation	34/357	274/18670	3.87037e-18	5.61043e-16	4.49846e-16	CD3E/CD6/CD19/MS4A1/CD22/CD80/TNFSF8/CD38/CD40LG/CD70/CD79A/CR2/CTLA4/CD55/IL7R/IL12B/JAK3/MSN/PIK3CG/PRKCQ/CCL5/CCL19/VCAM1/ZAP70/IKZF3/TNFRSF13B/PTPN22/PLA2G2D/MZB1/PDCD1LG2/DOCK8/FCRL3/TNFRSF13C/CCR2	34
BP	GO:0001909	leukocyte mediated cytotoxicity	23/357	107/18670	4.89903e-18	6.81749e-16	5.46629e-16	CD1B/CD1C/CD1E/GZMB/GZMM/ICAM1/IL7R/IL12B/KIR2DL4/LAG3/SH2D1A/PRF1/IL18RAP/RASGRP1/CD226/KLRK1/STAP1/CRTAM/SLAMF7/ULBP1/SLAMF6/NCR3/KLRC4-KLRK1	23
BP	GO:0070661	leukocyte proliferation	35/357	298/18670	7.15628e-18	9.57566e-16	7.67779e-16	CD3E/CD6/CD19/MS4A1/CD22/CD80/TNFSF8/CD38/CD40LG/CD70/CD79A/CR2/CTLA4/CD55/IL5RA/IL7R/IL12B/JAK3/MSN/PIK3CG/PRKCQ/CCL5/CCL19/VCAM1/ZAP70/IKZF3/TNFRSF13B/PTPN22/PLA2G2D/MZB1/PDCD1LG2/DOCK8/FCRL3/TNFRSF13C/CCR2	35
BP	GO:0045619	regulation of lymphocyte differentiation	27/357	169/18670	1.86304e-17	2.40056e-15	1.92478e-15	CAMK4/RUNX1/RUNX3/CD2/CD27/CD80/CTLA4/GATA3/IFNG/IL7R/IL12B/IRF4/JAK3/LAG3/CCL19/ZAP70/TNFRSF18/TOX/TESPA1/RASGRP1/IKZF3/TBX21/CYP26B1/SLAMF8/FCRL3/ZNF683/CCR2	27
BP	GO:0002449	lymphocyte mediated immunity	37/357	352/18670	3.18323e-17	3.95516e-15	3.17126e-15	CD1B/CD1C/CD1E/CD8A/CD19/CD27/CD40LG/CD70/CR2/CD55/GATA3/GZMB/GZMM/ICAM1/IL7R/IL12B/KIR2DL4/KLRC2/KLRD1/LAG3/SH2D1A/PRF1/IL18RAP/RASGRP1/CD96/CD226/KLRK1/TBX21/TLR8/CRTAM/SLAMF7/ULBP1/SLAMF6/NCR3/CCR2/IGLL5/KLRC4-KLRK1	37
BP	GO:0060326	cell chemotaxis	34/357	304/18670	9.85913e-17	1.18276e-14	9.48338e-15	CCR1/CCR4/CCR5/CCR7/CCR8/FPR2/XCR1/CXCR3/CXCL10/CXCL9/PIK3CG/PRKCQ/CCL3/CCL4/CCL5/CCL18/CCL19/CCL22/CCL24/CXCL11/CXCL12/VCAM1/CXCL14/CXCL13/CXCR6/KLRK1/STAP1/SLAMF8/PREX1/TRPV4/CCL4L1/CCL3L3/CCR2/KLRC4-KLRK1	34
BP	GO:0002228	natural killer cell mediated immunity	18/357	64/18670	1.23386e-16	1.38471e-14	1.11027e-14	GZMB/IL12B/KIR2DL4/KLRC2/KLRD1/LAG3/SH2D1A/IL18RAP/RASGRP1/CD96/CD226/KLRK1/CRTAM/SLAMF7/ULBP1/SLAMF6/NCR3/KLRC4-KLRK1	18
BP	GO:0048247	lymphocyte chemotaxis	18/357	64/18670	1.23386e-16	1.38471e-14	1.11027e-14	CXCR3/CXCL10/PIK3CG/CCL3/CCL4/CCL5/CCL18/CCL19/CCL22/CCL24/CXCL11/CXCL14/CXCL13/KLRK1/CCL4L1/CCL3L3/CCR2/KLRC4-KLRK1	18
BP	GO:0001906	cell killing	26/357	168/18670	1.67048e-16	1.81612e-14	1.45617e-14	CD1B/CD1C/CD1E/CD55/GZMB/GZMM/CFH/ICAM1/IFNG/IL7R/IL12B/KIR2DL4/LAG3/SH2D1A/PRF1/IL18RAP/RASGRP1/CD226/KLRK1/STAP1/CRTAM/SLAMF7/ULBP1/SLAMF6/NCR3/KLRC4-KLRK1	26
BP	GO:0001910	regulation of leukocyte mediated cytotoxicity	19/357	78/18670	3.33472e-16	3.5156e-14	2.81882e-14	CD1B/CD1C/CD1E/ICAM1/IL7R/IL12B/KIR2DL4/LAG3/SH2D1A/IL18RAP/RASGRP1/CD226/KLRK1/STAP1/CRTAM/ULBP1/SLAMF6/NCR3/KLRC4-KLRK1	19
BP	GO:0031343	positive regulation of cell killing	18/357	68/18670	4.07034e-16	4.16492e-14	3.33945e-14	CD1B/CD1C/CD1E/IFNG/IL12B/LAG3/SH2D1A/PRF1/IL18RAP/RASGRP1/CD226/KLRK1/STAP1/CRTAM/ULBP1/SLAMF6/NCR3/KLRC4-KLRK1	18
BP	GO:0002685	regulation of leukocyte migration	27/357	196/18670	8.77624e-16	8.72359e-14	6.9946e-14	CCR1/CCR7/FPR2/CXCR3/ICAM1/CXCL10/ITGA4/MSN/CCL3/CCL4/CCL5/CCL19/CCL24/CXCL12/TNFRSF18/CXCL14/CXCL13/KLRK1/STAP1/SMPD3/SLAMF8/TRPV4/P2RY12/DOCK8/GCSAM/CCR2/KLRC4-KLRK1	27
BP	GO:0002683	negative regulation of immune system process	40/357	463/18670	1.40956e-15	1.36218e-13	1.0922e-13	RUNX1/RUNX3/CD22/CD80/CTLA4/CD55/HLA-DOB/IFI16/IL7R/IL12B/IRF4/JAK3/KIR2DL4/LAG3/PDCD1/CCL3/CXCL12/CST7/CD96/TLR6/KLRK1/TNFRSF13B/LILRA4/PTPN22/STAP1/PLA2G2D/GPR171/TBX21/UBASH3A/LAX1/BANK1/SLAMF8/PDCD1LG2/MIXL1/NLRC5/FCRL3/TIGIT/GCSAM/CCR2/KLRC4-KLRK1	40
BP	GO:0045580	regulation of T cell differentiation	23/357	139/18670	2.1534e-15	2.02477e-13	1.62347e-13	CAMK4/RUNX1/RUNX3/CD2/CD27/CD80/CTLA4/GATA3/IFNG/IL7R/IL12B/IRF4/JAK3/LAG3/CCL19/ZAP70/TNFRSF18/TESPA1/RASGRP1/TBX21/CYP26B1/ZNF683/CCR2	23
BP	GO:0030595	leukocyte chemotaxis	28/357	224/18670	3.23662e-15	2.96321e-13	2.37591e-13	CCR1/CCR5/CCR7/FPR2/CXCR3/CXCL10/CXCL9/PIK3CG/CCL3/CCL4/CCL5/CCL18/CCL19/CCL22/CCL24/CXCL11/CXCL12/CXCL14/CXCL13/KLRK1/STAP1/SLAMF8/PREX1/TRPV4/CCL4L1/CCL3L3/CCR2/KLRC4-KLRK1	28
BP	GO:0001912	positive regulation of leukocyte mediated cytotoxicity	16/357	56/18670	4.75582e-15	4.24244e-13	3.4016e-13	CD1B/CD1C/CD1E/IL12B/LAG3/SH2D1A/IL18RAP/RASGRP1/CD226/KLRK1/STAP1/CRTAM/ULBP1/SLAMF6/NCR3/KLRC4-KLRK1	16
BP	GO:0002697	regulation of immune effector process	39/357	458/18670	5.27243e-15	4.5857e-13	3.67683e-13	BIRC3/CD1B/CD1C/CD1E/CD19/CD22/CD80/CD40LG/CR2/CD55/GATA3/CFH/IFNG/IL7R/IL12B/IRF4/JAK3/KIR2DL4/LAG3/SH2D1A/CCL19/STAT1/IL18RAP/RASGRP1/CD96/CD226/KLRK1/TBX21/MZB1/CD244/CRTAM/SLAMF8/ULBP1/SLAMF6/FCRL3/ZNF683/NCR3/CCR2/KLRC4-KLRK1	39
BP	GO:1902105	regulation of leukocyte differentiation	30/357	272/18670	9.93306e-15	8.42857e-13	6.75805e-13	CAMK4/RUNX1/RUNX3/CD2/CD27/CD80/CCR1/CTLA4/GATA3/IFNG/IL7R/IL12B/IRF4/JAK3/LAG3/CCL3/CCL19/ZAP70/TNFRSF18/TOX/RASSF2/TESPA1/RASGRP1/IKZF3/TBX21/CYP26B1/SLAMF8/FCRL3/ZNF683/CCR2	30
BP	GO:0002717	positive regulation of natural killer cell mediated immunity	13/357	33/18670	1.49262e-14	1.22524e-12	9.82405e-13	IL12B/KIR2DL4/LAG3/SH2D1A/IL18RAP/RASGRP1/CD226/KLRK1/CRTAM/ULBP1/SLAMF6/NCR3/KLRC4-KLRK1	13
BP	GO:0002429	immune response-activating cell surface receptor signaling pathway	39/357	473/18670	1.51439e-14	1.22524e-12	9.82405e-13	RUNX1/CD3D/CD3E/CD3G/CD247/CD19/MS4A1/CD22/CD38/CD79A/CCR7/CR2/CTLA4/FCN1/FPR1/FPR2/GATA3/HLA-DRB5/ITK/KCNN4/LCK/PRKCB/PRKCQ/ZAP70/TESPA1/CD226/KLRK1/PTPN22/STAP1/CLEC4E/TRAT1/UBASH3A/LAX1/FCRL3/GCSAM/NCR3/THEMIS/IGLL5/KLRC4-KLRK1	39
BP	GO:0070663	regulation of leukocyte proliferation	27/357	222/18670	2.03333e-14	1.60772e-12	1.28907e-12	CD3E/CD6/CD22/CD80/TNFSF8/CD38/CD40LG/CD70/CTLA4/CD55/IL5RA/IL12B/JAK3/PRKCQ/CCL5/CCL19/VCAM1/ZAP70/IKZF3/TNFRSF13B/PTPN22/PLA2G2D/MZB1/PDCD1LG2/FCRL3/TNFRSF13C/CCR2	27
BP	GO:0050670	regulation of lymphocyte proliferation	26/357	208/18670	3.24879e-14	2.51168e-12	2.01387e-12	CD3E/CD6/CD22/CD80/TNFSF8/CD38/CD40LG/CD70/CTLA4/CD55/IL12B/JAK3/PRKCQ/CCL5/CCL19/VCAM1/ZAP70/IKZF3/TNFRSF13B/PTPN22/PLA2G2D/MZB1/PDCD1LG2/FCRL3/TNFRSF13C/CCR2	26
BP	GO:0032944	regulation of mononuclear cell proliferation	26/357	209/18670	3.64665e-14	2.75798e-12	2.21136e-12	CD3E/CD6/CD22/CD80/TNFSF8/CD38/CD40LG/CD70/CTLA4/CD55/IL12B/JAK3/PRKCQ/CCL5/CCL19/VCAM1/ZAP70/IKZF3/TNFRSF13B/PTPN22/PLA2G2D/MZB1/PDCD1LG2/FCRL3/TNFRSF13C/CCR2	26
BP	GO:0032609	interferon-gamma production	20/357	113/18670	3.95527e-14	2.92774e-12	2.34747e-12	CD2/CD3E/CCR7/GATA3/IRF8/IL12B/ITK/IL18RAP/RASGRP1/CD96/CD226/KLRK1/PTPN22/TLR8/CD244/PDCD1LG2/SLAMF6/TNFRSF13C/CCR2/KLRC4-KLRK1	20
BP	GO:0050851	antigen receptor-mediated signaling pathway	31/357	316/18670	8.80811e-14	6.38404e-12	5.11875e-12	RUNX1/CD3D/CD3E/CD3G/CD247/CD19/MS4A1/CD22/CD38/CD79A/CCR7/CTLA4/GATA3/HLA-DRB5/ITK/KCNN4/LCK/PRKCB/PRKCQ/ZAP70/TESPA1/CD226/PTPN22/STAP1/TRAT1/UBASH3A/LAX1/FCRL3/GCSAM/THEMIS/IGLL5	31
BP	GO:0002715	regulation of natural killer cell mediated immunity	14/357	46/18670	9.35148e-14	6.52317e-12	5.2303e-12	IL12B/KIR2DL4/LAG3/SH2D1A/IL18RAP/RASGRP1/CD96/CD226/KLRK1/CRTAM/ULBP1/SLAMF6/NCR3/KLRC4-KLRK1	14
BP	GO:0045088	regulation of innate immune response	37/357	452/18670	9.37507e-14	6.52317e-12	5.2303e-12	BIRC3/FCN1/FPR2/GFI1/IFI16/IFNG/IL12B/IRF4/KIR2DL4/LAG3/SH2D1A/CCL5/STAT1/TLR2/IL18RAP/SOCS3/RASGRP1/CD96/TLR6/CD226/KLRK1/LILRA4/PTPN22/CLEC4E/TLR8/CRTAM/SLAMF8/TREML2/ULBP1/ZBP1/NLRC5/SLAMF6/FCRL3/GBP5/PYHIN1/NCR3/KLRC4-KLRK1	37
BP	GO:0031295	T cell costimulation	15/357	56/18670	9.95801e-14	6.79293e-12	5.44659e-12	CD3E/CD5/CD80/CD40LG/CCR7/CTLA4/LCK/PDCD1/CCL19/KLRK1/ICOS/PDCD1LG2/TNFRSF13C/BTLA/KLRC4-KLRK1	15
BP	GO:0045954	positive regulation of natural killer cell mediated cytotoxicity	12/357	30/18670	1.26218e-13	8.44447e-12	6.77081e-12	IL12B/LAG3/SH2D1A/IL18RAP/RASGRP1/CD226/KLRK1/CRTAM/ULBP1/SLAMF6/NCR3/KLRC4-KLRK1	12
BP	GO:0031294	lymphocyte costimulation	15/357	57/18670	1.32824e-13	8.71875e-12	6.99072e-12	CD3E/CD5/CD80/CD40LG/CCR7/CTLA4/LCK/PDCD1/CCL19/KLRK1/ICOS/PDCD1LG2/TNFRSF13C/BTLA/KLRC4-KLRK1	15
BP	GO:0046631	alpha-beta T cell activation	21/357	138/18670	2.0281e-13	1.30662e-11	1.04765e-11	RUNX1/RUNX3/CD3E/CD80/TNFSF8/CD55/FUT7/GATA3/IFNG/IL12B/IRF4/ITK/JAK3/PRKCQ/CCL19/ZAP70/PLA2G2D/TBX21/SLAMF6/ZNF683/CCR2	21
BP	GO:0042267	natural killer cell mediated cytotoxicity	15/357	60/18670	3.04093e-13	1.92353e-11	1.54229e-11	GZMB/IL12B/KIR2DL4/LAG3/SH2D1A/IL18RAP/RASGRP1/CD226/KLRK1/CRTAM/SLAMF7/ULBP1/SLAMF6/NCR3/KLRC4-KLRK1	15
BP	GO:0071356	cellular response to tumor necrosis factor	29/357	291/18670	3.8528e-13	2.39355e-11	1.91916e-11	BIRC3/TNFRSF17/CD27/TNFRSF8/TNFSF8/CD40LG/CD70/CHI3L1/GATA3/ICAM1/TNFRSF9/LTB/CCL3/CCL4/CCL5/CCL18/CCL19/CCL22/CCL24/STAT1/VCAM1/TCL1A/TNFRSF18/TNFRSF13B/ANKRD1/SMPD3/TNFRSF13C/CCL4L1/CCL3L3	29
BP	GO:0071219	cellular response to molecule of bacterial origin	25/357	212/18670	3.92543e-13	2.39589e-11	1.92103e-11	CD6/CD80/CCR5/CD55/GFI1/ICAM1/IRF8/IL12B/CXCL10/CXCL9/CCL3/CCL5/CXCL11/TLR2/TLR6/CXCL13/IL24/KLRK1/PTPN22/STAP1/ANKRD1/PDCD1LG2/NLRP7/CARD17/KLRC4-KLRK1	25
BP	GO:0071346	cellular response to interferon-gamma	23/357	180/18670	6.38811e-13	3.83176e-11	3.07232e-11	HLA-DRB5/ICAM1/IRF8/IFNG/IL12B/IRF4/CCL3/CCL4/CCL5/CCL18/CCL19/CCL22/CCL24/STAT1/TLR2/VCAM1/SOCS3/TRIM22/NLRC5/GBP5/GBP6/CCL4L1/CCL3L3	23
BP	GO:0032649	regulation of interferon-gamma production	18/357	101/18670	6.72299e-13	3.92991e-11	3.15101e-11	CD2/CD3E/CCR7/GATA3/IRF8/IL12B/RASGRP1/CD96/CD226/KLRK1/PTPN22/TLR8/CD244/PDCD1LG2/SLAMF6/TNFRSF13C/CCR2/KLRC4-KLRK1	18
BP	GO:0007204	positive regulation of cytosolic calcium ion concentration	30/357	319/18670	6.77765e-13	3.92991e-11	3.15101e-11	ANK2/CD19/MS4A1/CD38/CCR1/CCR4/CCR5/CCR7/CCR8/CD55/F2RL2/FPR1/FPR2/XCR1/CXCR3/CXCL10/LCK/CXCL9/PIK3CG/PTGER2/CCL3/CCL19/CXCL11/S1PR4/CXCL13/CXCR6/P2RY10/TRPV4/GPR174/CCR2	30
BP	GO:0034341	response to interferon-gamma	24/357	199/18670	7.16253e-13	4.08499e-11	3.27536e-11	HLA-DRB5/ICAM1/IRF8/IFNG/IL12B/IRF4/CCL3/CCL4/CCL5/CCL18/CCL19/CCL22/CCL24/STAT1/TLR2/VCAM1/IFITM1/SOCS3/TRIM22/NLRC5/GBP5/GBP6/CCL4L1/CCL3L3	24
BP	GO:0002706	regulation of lymphocyte mediated immunity	21/357	149/18670	9.49639e-13	5.3287e-11	4.27257e-11	CD1B/CD1C/CD1E/GATA3/IL7R/IL12B/KIR2DL4/LAG3/SH2D1A/IL18RAP/RASGRP1/CD96/CD226/KLRK1/TBX21/CRTAM/ULBP1/SLAMF6/NCR3/CCR2/KLRC4-KLRK1	21
BP	GO:0002548	monocyte chemotaxis	15/357	65/18670	1.08716e-12	5.90971e-11	4.73842e-11	CCR1/FPR2/CXCL10/CCL3/CCL4/CCL5/CCL18/CCL19/CCL22/CCL24/CXCL12/SLAMF8/CCL4L1/CCL3L3/CCR2	15
BP	GO:0050854	regulation of antigen receptor-mediated signaling pathway	15/357	65/18670	1.08716e-12	5.90971e-11	4.73842e-11	RUNX1/CD19/CD22/CCR7/KCNN4/LCK/PRKCB/TESPA1/CD226/PTPN22/STAP1/TRAT1/UBASH3A/FCRL3/GCSAM	15
BP	GO:0042269	regulation of natural killer cell mediated cytotoxicity	13/357	44/18670	1.11829e-12	5.98542e-11	4.79913e-11	IL12B/KIR2DL4/LAG3/SH2D1A/IL18RAP/RASGRP1/CD226/KLRK1/CRTAM/ULBP1/SLAMF6/NCR3/KLRC4-KLRK1	13
BP	GO:0002708	positive regulation of lymphocyte mediated immunity	18/357	105/18670	1.34691e-12	7.09986e-11	5.69269e-11	CD1B/CD1C/CD1E/GATA3/IL12B/KIR2DL4/LAG3/SH2D1A/IL18RAP/RASGRP1/CD226/KLRK1/TBX21/CRTAM/ULBP1/SLAMF6/NCR3/KLRC4-KLRK1	18
BP	GO:0071222	cellular response to lipopolysaccharide	24/357	205/18670	1.37592e-12	7.14449e-11	5.72848e-11	CD6/CD80/CCR5/CD55/GFI1/ICAM1/IRF8/IL12B/CXCL10/CXCL9/CCL3/CCL5/CXCL11/TLR2/CXCL13/IL24/KLRK1/PTPN22/STAP1/ANKRD1/PDCD1LG2/NLRP7/CARD17/KLRC4-KLRK1	24
BP	GO:0055074	calcium ion homeostasis	36/357	471/18670	1.57975e-12	8.08228e-11	6.4804e-11	ANK2/ATP2A3/CD19/MS4A1/CD38/CCR1/CCR4/CCR5/CCR7/CCR8/CD55/F2RL2/FPR1/FPR2/XCR1/CXCR3/CXCL10/KEL/LCK/CXCL9/PIK3CG/PRKCB/PTGER2/CCL3/CCL5/CCL19/CXCL11/CXCL12/S1PR4/CXCL13/CXCR6/P2RY10/TRPV4/GPR174/TMTC2/CCR2	36
BP	GO:1903706	regulation of hemopoiesis	36/357	475/18670	2.02355e-12	1.02028e-10	8.18064e-11	CAMK4/RUNX1/RUNX3/CD2/CD27/CD80/CCR1/CTLA4/GATA3/GP1BA/IFNG/IL7R/IL12B/IRF4/JAK3/LAG3/PRKCB/PRKCQ/CCL3/CCL19/STAT1/ZAP70/TNFRSF18/TOX/RASSF2/TESPA1/RASGRP1/IKZF3/GPR171/TBX21/CYP26B1/SLAMF8/MIXL1/FCRL3/ZNF683/CCR2	36
BP	GO:0034612	response to tumor necrosis factor	29/357	312/18670	2.23461e-12	1.1106e-10	8.90483e-11	BIRC3/TNFRSF17/CD27/TNFRSF8/TNFSF8/CD40LG/CD70/CHI3L1/GATA3/ICAM1/TNFRSF9/LTB/CCL3/CCL4/CCL5/CCL18/CCL19/CCL22/CCL24/STAT1/VCAM1/TCL1A/TNFRSF18/TNFRSF13B/ANKRD1/SMPD3/TNFRSF13C/CCL4L1/CCL3L3	29
BP	GO:0097529	myeloid leukocyte migration	24/357	210/18670	2.32887e-12	1.14115e-10	9.14974e-11	CCR1/CCR7/FPR2/CXCL10/CXCL9/PIK3CG/CCL3/CCL4/CCL5/CCL18/CCL19/CCL22/CCL24/CXCL11/CXCL12/CXCL13/STAP1/SLAMF8/PREX1/TRPV4/P2RY12/CCL4L1/CCL3L3/CCR2	24
BP	GO:0002460	adaptive immune response based on somatic recombination of immune receptors built from immunoglobulin superfamily domains	31/357	361/18670	3.05381e-12	1.47559e-10	1.18313e-10	CD1B/CD1C/CD1E/CD8A/CD19/CD27/CD80/CD40LG/CD70/CR2/CD55/GATA3/GZMM/ICAM1/IL7R/IL12B/IRF4/JAK3/PRF1/PRKCQ/CCL19/IL18RAP/CXCL13/CD226/TBX21/TLR8/ULBP1/SLAMF6/TNFRSF13C/CCR2/IGLL5	31
BP	GO:0006874	cellular calcium ion homeostasis	35/357	458/18670	3.30352e-12	1.57437e-10	1.26234e-10	ANK2/ATP2A3/CD19/MS4A1/CD38/CCR1/CCR4/CCR5/CCR7/CCR8/CD55/F2RL2/FPR1/FPR2/XCR1/CXCR3/CXCL10/KEL/LCK/CXCL9/PIK3CG/PRKCB/PTGER2/CCL3/CCL5/CCL19/CXCL11/CXCL12/S1PR4/CXCL13/CXCR6/P2RY10/TRPV4/GPR174/CCR2	35
BP	GO:0002699	positive regulation of immune effector process	24/357	216/18670	4.2921e-12	2.01787e-10	1.61793e-10	CD1B/CD1C/CD1E/CD80/GATA3/IFNG/IL12B/KIR2DL4/LAG3/SH2D1A/CCL19/IL18RAP/RASGRP1/CD226/KLRK1/TBX21/MZB1/CD244/CRTAM/ULBP1/SLAMF6/NCR3/CCR2/KLRC4-KLRK1	24
BP	GO:0002237	response to molecule of bacterial origin	30/357	343/18670	4.36655e-12	2.02123e-10	1.62063e-10	CD6/CD80/CCR5/CCR7/CD55/GFI1/ICAM1/IRF8/IL12B/CXCL10/CXCL9/PTGER2/CCL3/CCL5/CXCL11/TLR2/VCAM1/CD96/TLR6/CXCL13/GJB6/IL24/KLRK1/PTPN22/STAP1/ANKRD1/PDCD1LG2/NLRP7/CARD17/KLRC4-KLRK1	30
BP	GO:0071216	cellular response to biotic stimulus	25/357	236/18670	4.41545e-12	2.02123e-10	1.62063e-10	CD6/CD80/CCR5/CD55/GFI1/ICAM1/IRF8/IL12B/CXCL10/CXCL9/CCL3/CCL5/CXCL11/TLR2/TLR6/CXCL13/IL24/KLRK1/PTPN22/STAP1/ANKRD1/PDCD1LG2/NLRP7/CARD17/KLRC4-KLRK1	25
BP	GO:0002687	positive regulation of leukocyte migration	19/357	128/18670	4.57601e-12	2.06753e-10	1.65775e-10	CCR1/CCR7/FPR2/ICAM1/CXCL10/ITGA4/CCL3/CCL4/CCL5/CCL19/CCL24/CXCL12/TNFRSF18/CXCL14/CXCL13/TRPV4/P2RY12/DOCK8/CCR2	19
BP	GO:0072503	cellular divalent inorganic cation homeostasis	36/357	493/18670	5.96228e-12	2.65933e-10	2.13226e-10	ANK2/ATP2A3/CD19/MS4A1/CD38/CCR1/CCR4/CCR5/CCR7/CCR8/CD55/F2RL2/FPR1/FPR2/XCR1/CXCR3/CXCL10/KEL/LCK/CXCL9/PIK3CG/PRKCB/PTGER2/CCL3/CCL5/CCL19/CXCL11/CXCL12/SLC30A2/S1PR4/CXCL13/CXCR6/P2RY10/TRPV4/GPR174/CCR2	36
BP	GO:0046632	alpha-beta T cell differentiation	17/357	101/18670	7.77273e-12	3.42295e-10	2.74453e-10	RUNX1/RUNX3/CD80/TNFSF8/FUT7/GATA3/IFNG/IL12B/IRF4/ITK/JAK3/CCL19/ZAP70/PLA2G2D/TBX21/SLAMF6/ZNF683	17
BP	GO:0042098	T cell proliferation	22/357	184/18670	7.91625e-12	3.44258e-10	2.76027e-10	CD3E/CD6/CD80/TNFSF8/CD40LG/CD70/CTLA4/CD55/IL12B/JAK3/MSN/PIK3CG/PRKCQ/CCL5/CCL19/VCAM1/ZAP70/PLA2G2D/PDCD1LG2/DOCK8/TNFRSF13C/CCR2	22
BP	GO:0032496	response to lipopolysaccharide	29/357	330/18670	8.97747e-12	3.85588e-10	3.09166e-10	CD6/CD80/CCR5/CCR7/CD55/GFI1/ICAM1/IRF8/IL12B/CXCL10/CXCL9/PTGER2/CCL3/CCL5/CXCL11/TLR2/VCAM1/CD96/CXCL13/GJB6/IL24/KLRK1/PTPN22/STAP1/ANKRD1/PDCD1LG2/NLRP7/CARD17/KLRC4-KLRK1	29
BP	GO:0042113	B cell activation	28/357	310/18670	1.08134e-11	4.55366e-10	3.65114e-10	CD19/MS4A1/CD22/CD27/CD38/CD40LG/CD70/CD79A/CR2/CTLA4/IL7R/ITGA4/JAK3/PRKCB/VCAM1/ZAP70/ITM2A/IKZF3/TNFRSF13B/TBX21/MZB1/LAX1/BANK1/SLAMF8/FCRL1/FCRL3/TNFRSF13C/IGLL5	28
BP	GO:2000401	regulation of lymphocyte migration	14/357	63/18670	1.08639e-11	4.55366e-10	3.65114e-10	CXCL10/ITGA4/MSN/CCL3/CCL4/CCL5/CXCL12/CXCL14/CXCL13/KLRK1/DOCK8/GCSAM/CCR2/KLRC4-KLRK1	14
BP	GO:0051480	regulation of cytosolic calcium ion concentration	30/357	357/18670	1.19986e-11	4.96944e-10	3.98451e-10	ANK2/CD19/MS4A1/CD38/CCR1/CCR4/CCR5/CCR7/CCR8/CD55/F2RL2/FPR1/FPR2/XCR1/CXCR3/CXCL10/LCK/CXCL9/PIK3CG/PTGER2/CCL3/CCL19/CXCL11/S1PR4/CXCL13/CXCR6/P2RY10/TRPV4/GPR174/CCR2	30
BP	GO:0045089	positive regulation of innate immune response	31/357	381/18670	1.23548e-11	5.05675e-10	4.05452e-10	BIRC3/FCN1/FPR2/GFI1/IFI16/IL12B/IRF4/KIR2DL4/LAG3/SH2D1A/CCL5/TLR2/IL18RAP/RASGRP1/TLR6/CD226/KLRK1/LILRA4/PTPN22/CLEC4E/TLR8/CRTAM/ULBP1/ZBP1/NLRC5/SLAMF6/FCRL3/GBP5/PYHIN1/NCR3/KLRC4-KLRK1	31
BP	GO:0071674	mononuclear cell migration	16/357	90/18670	1.35934e-11	5.49901e-10	4.40912e-10	CCR1/FPR2/CXCL10/CCL3/CCL4/CCL5/CCL18/CCL19/CCL22/CCL24/CXCL12/SLAMF8/TRPV4/CCL4L1/CCL3L3/CCR2	16
BP	GO:0032729	positive regulation of interferon-gamma production	14/357	65/18670	1.71209e-11	6.76861e-10	5.42709e-10	CD2/CD3E/IRF8/IL12B/RASGRP1/CD226/KLRK1/PTPN22/TLR8/CD244/SLAMF6/TNFRSF13C/CCR2/KLRC4-KLRK1	14
BP	GO:0072678	T cell migration	14/357	65/18670	1.71209e-11	6.76861e-10	5.42709e-10	CXCR3/ICAM1/CXCL10/ITGA4/MSN/PIK3CG/CCL3/CCL5/CXCL11/CXCL12/ZAP70/CXCL13/DOCK8/CCR2	14
BP	GO:0070665	positive regulation of leukocyte proliferation	19/357	139/18670	2.03448e-11	7.95277e-10	6.37655e-10	CD3E/CD6/CD80/CD38/CD40LG/CD70/CD55/IL5RA/IL12B/JAK3/PRKCQ/CCL5/CCL19/VCAM1/ZAP70/PDCD1LG2/FCRL3/TNFRSF13C/CCR2	19
BP	GO:0046634	regulation of alpha-beta T cell activation	16/357	93/18670	2.28923e-11	8.84914e-10	7.09527e-10	RUNX1/RUNX3/CD3E/CD80/CD55/GATA3/IFNG/IL12B/IRF4/JAK3/PRKCQ/CCL19/ZAP70/TBX21/ZNF683/CCR2	16
BP	GO:0042102	positive regulation of T cell proliferation	16/357	95/18670	3.20452e-11	1.22511e-09	9.82299e-10	CD3E/CD6/CD80/CD40LG/CD70/CD55/IL12B/JAK3/PRKCQ/CCL5/CCL19/VCAM1/ZAP70/PDCD1LG2/TNFRSF13C/CCR2	16
BP	GO:0050663	cytokine secretion	24/357	240/18670	4.06941e-11	1.53886e-09	1.23386e-09	CD2/CHI3L1/CCR7/FCN1/GATA3/IFNG/CCL3/CCL19/TLR2/RASGRP1/TLR6/PTPN22/CLEC4E/TLR8/CD244/BANK1/NLRP2/CRTAM/TRPV4/CRLF2/GBP5/NLRP7/CLEC9A/CARD17	24
BP	GO:0002703	regulation of leukocyte mediated immunity	22/357	201/18670	4.61793e-11	1.7275e-09	1.38512e-09	CD1B/CD1C/CD1E/GATA3/IL7R/IL12B/JAK3/KIR2DL4/LAG3/SH2D1A/IL18RAP/RASGRP1/CD96/CD226/KLRK1/TBX21/CRTAM/ULBP1/SLAMF6/NCR3/CCR2/KLRC4-KLRK1	22
BP	GO:0050671	positive regulation of lymphocyte proliferation	18/357	130/18670	5.5703e-11	2.0616e-09	1.653e-09	CD3E/CD6/CD80/CD38/CD40LG/CD70/CD55/IL12B/JAK3/PRKCQ/CCL5/CCL19/VCAM1/ZAP70/PDCD1LG2/FCRL3/TNFRSF13C/CCR2	18
BP	GO:0002688	regulation of leukocyte chemotaxis	17/357	114/18670	5.76722e-11	2.11202e-09	1.69342e-09	CCR1/CCR7/FPR2/CXCL10/CCL3/CCL4/CCL5/CCL19/CXCL12/CXCL14/CXCL13/KLRK1/STAP1/SLAMF8/TRPV4/CCR2/KLRC4-KLRK1	17
BP	GO:0032946	positive regulation of mononuclear cell proliferation	18/357	131/18670	6.34646e-11	2.29993e-09	1.84409e-09	CD3E/CD6/CD80/CD38/CD40LG/CD70/CD55/IL12B/JAK3/PRKCQ/CCL5/CCL19/VCAM1/ZAP70/PDCD1LG2/FCRL3/TNFRSF13C/CCR2	18
BP	GO:0002705	positive regulation of leukocyte mediated immunity	18/357	133/18670	8.20868e-11	2.94412e-09	2.36061e-09	CD1B/CD1C/CD1E/GATA3/IL12B/KIR2DL4/LAG3/SH2D1A/IL18RAP/RASGRP1/CD226/KLRK1/TBX21/CRTAM/ULBP1/SLAMF6/NCR3/KLRC4-KLRK1	18
BP	GO:1990266	neutrophil migration	17/357	118/18670	1.01127e-10	3.59002e-09	2.87849e-09	CCR7/CXCL10/CXCL9/PIK3CG/CCL3/CCL4/CCL5/CCL18/CCL19/CCL22/CCL24/CXCL11/CXCL13/SLAMF8/PREX1/CCL4L1/CCL3L3	17
BP	GO:0050707	regulation of cytokine secretion	22/357	210/18670	1.09159e-10	3.83599e-09	3.07571e-09	CD2/CCR7/FCN1/GATA3/IFNG/CCL3/CCL19/TLR2/RASGRP1/TLR6/PTPN22/CLEC4E/TLR8/CD244/BANK1/NLRP2/CRTAM/TRPV4/CRLF2/NLRP7/CLEC9A/CARD17	22
BP	GO:0030593	neutrophil chemotaxis	16/357	104/18670	1.3184e-10	4.58672e-09	3.67764e-09	CCR7/CXCL10/CXCL9/PIK3CG/CCL3/CCL4/CCL5/CCL18/CCL19/CCL22/CCL24/CXCL11/CXCL13/PREX1/CCL4L1/CCL3L3	16
BP	GO:0042129	regulation of T cell proliferation	19/357	156/18670	1.57005e-10	5.40813e-09	4.33626e-09	CD3E/CD6/CD80/TNFSF8/CD40LG/CD70/CTLA4/CD55/IL12B/JAK3/PRKCQ/CCL5/CCL19/VCAM1/ZAP70/PLA2G2D/PDCD1LG2/TNFRSF13C/CCR2	19
BP	GO:0050715	positive regulation of cytokine secretion	18/357	139/18670	1.72817e-10	5.8944e-09	4.72615e-09	CD2/FCN1/GATA3/IFNG/CCL3/CCL19/TLR2/RASGRP1/PTPN22/CLEC4E/TLR8/CD244/NLRP2/CRTAM/TRPV4/CRLF2/NLRP7/CLEC9A	18
BP	GO:0002456	T cell mediated immunity	16/357	106/18670	1.76953e-10	5.97688e-09	4.79228e-09	CD1B/CD1C/CD1E/CD8A/CD70/CD55/GATA3/GZMM/ICAM1/IL7R/IL12B/PRF1/IL18RAP/TBX21/ULBP1/CCR2	16
BP	GO:0071621	granulocyte chemotaxis	17/357	123/18670	1.97701e-10	6.61348e-09	5.30271e-09	CCR7/CXCL10/CXCL9/PIK3CG/CCL3/CCL4/CCL5/CCL18/CCL19/CCL22/CCL24/CXCL11/CXCL13/PREX1/TRPV4/CCL4L1/CCL3L3	17
BP	GO:0035710	CD4-positive, alpha-beta T cell activation	15/357	92/18670	2.15225e-10	7.13113e-09	5.71776e-09	RUNX1/RUNX3/CD80/CD55/FUT7/GATA3/IFNG/IL12B/IRF4/JAK3/PRKCQ/CCL19/PLA2G2D/TBX21/SLAMF6	15
BP	GO:0097530	granulocyte migration	18/357	141/18670	2.19578e-10	7.20671e-09	5.77836e-09	CCR7/CXCL10/CXCL9/PIK3CG/CCL3/CCL4/CCL5/CCL18/CCL19/CCL22/CCL24/CXCL11/CXCL13/SLAMF8/PREX1/TRPV4/CCL4L1/CCL3L3	18
BP	GO:0019722	calcium-mediated signaling	22/357	218/18670	2.25793e-10	7.34142e-09	5.88638e-09	ANK2/CD3E/CD22/CCR1/CCR4/CCR5/CCR7/CCR8/FPR2/NR5A2/XCR1/CXCR3/NFATC1/PLEK/CCL3/CCL4/VCAM1/ZAP70/CXCR6/TRAT1/P2RY12/CCR2	22
BP	GO:0035747	natural killer cell chemotaxis	7/357	11/18670	2.72416e-10	8.77534e-09	7.0361e-09	PIK3CG/CCL3/CCL4/CCL5/CXCL14/KLRK1/KLRC4-KLRK1	7
BP	GO:0042100	B cell proliferation	15/357	95/18670	3.44248e-10	1.09875e-08	8.80981e-09	CD19/MS4A1/CD22/CD38/CD40LG/CD70/CD79A/CR2/CTLA4/IL7R/IKZF3/TNFRSF13B/MZB1/FCRL3/TNFRSF13C	15
BP	GO:0032103	positive regulation of response to external stimulus	26/357	323/18670	7.4889e-10	2.36853e-08	1.8991e-08	CD6/CCR1/CCR4/CCR7/FPR2/IL12B/CXCL10/PIK3CG/CCL3/CCL4/CCL5/CCL18/CCL19/CCL24/CXCL12/TLR2/CXCL14/TLR6/CXCL13/STAP1/SUCNR1/TRPV4/P2RY12/GBP5/CCL3L3/CCR2	26
BP	GO:0045058	T cell selection	11/357	47/18670	1.00869e-09	3.13324e-08	2.51225e-08	CD3D/CD3E/CD3G/CCR7/GATA3/IL12B/IRF4/ZAP70/TBX21/SLAMF6/THEMIS	11
BP	GO:2000107	negative regulation of leukocyte apoptotic process	11/357	47/18670	1.00869e-09	3.13324e-08	2.51225e-08	CD27/CCR5/CCR7/IL7R/JAK3/PRKCQ/CCL5/CCL19/CXCL12/DOCK8/PTCRA	11
BP	GO:0036336	dendritic cell migration	9/357	27/18670	1.06933e-09	3.26333e-08	2.61655e-08	CCR1/CCR5/CCR7/PIK3CG/CCL5/CCL19/SLAMF8/DOCK8/CCR2	9
BP	GO:1901623	regulation of lymphocyte chemotaxis	9/357	27/18670	1.06933e-09	3.26333e-08	2.61655e-08	CXCL10/CCL3/CCL4/CCL5/CXCL14/CXCL13/KLRK1/CCR2/KLRC4-KLRK1	9
BP	GO:2000403	positive regulation of lymphocyte migration	10/357	37/18670	1.26873e-09	3.8382e-08	3.07748e-08	CXCL10/ITGA4/CCL3/CCL4/CCL5/CXCL12/CXCL14/CXCL13/DOCK8/CCR2	10
BP	GO:0043367	CD4-positive, alpha-beta T cell differentiation	13/357	74/18670	1.34424e-09	4.03157e-08	3.23253e-08	RUNX1/RUNX3/CD80/FUT7/GATA3/IFNG/IL12B/IRF4/JAK3/CCL19/PLA2G2D/TBX21/SLAMF6	13
BP	GO:2000514	regulation of CD4-positive, alpha-beta T cell activation	12/357	61/18670	1.49236e-09	4.43753e-08	3.55802e-08	RUNX1/RUNX3/CD80/CD55/GATA3/IFNG/IL12B/IRF4/JAK3/PRKCQ/CCL19/TBX21	12
BP	GO:0046637	regulation of alpha-beta T cell differentiation	12/357	63/18670	2.2088e-09	6.51221e-08	5.22151e-08	RUNX1/RUNX3/CD80/GATA3/IFNG/IL12B/IRF4/JAK3/CCL19/ZAP70/TBX21/ZNF683	12
BP	GO:0042108	positive regulation of cytokine biosynthetic process	12/357	67/18670	4.63469e-09	1.35497e-07	1.08642e-07	CD3E/CD80/TNFRSF8/IFNG/IL12B/IRF4/LTB/PRKCQ/TLR6/TLR8/TNFRSF13C/CCR2	12
BP	GO:0032655	regulation of interleukin-12 production	11/357	54/18670	4.91854e-09	1.42597e-07	1.14334e-07	CD40LG/CCR7/IRF8/IFNG/IL12B/JAK3/LTB/CCL19/TLR2/TLR8/TIGIT	11
BP	GO:2000106	regulation of leukocyte apoptotic process	13/357	83/18670	5.81884e-09	1.67304e-07	1.34145e-07	CD3G/CD27/CCR5/CCR7/IL7R/JAK3/PDCD1/PRKCQ/CCL5/CCL19/CXCL12/DOCK8/PTCRA	13
BP	GO:0050921	positive regulation of chemotaxis	16/357	135/18670	6.69778e-09	1.90996e-07	1.53142e-07	CCR1/CCR4/CCR7/FPR2/CXCL10/CCL3/CCL4/CCL5/CCL19/CXCL12/CXCL14/CXCL13/SUCNR1/TRPV4/P2RY12/CCR2	16
BP	GO:0050920	regulation of chemotaxis	20/357	217/18670	7.31422e-09	2.06879e-07	1.65877e-07	CCR1/CCR4/CCR7/FPR2/CXCL10/CCL3/CCL4/CCL5/CCL19/CXCL12/CXCL14/CXCL13/KLRK1/STAP1/SUCNR1/SLAMF8/TRPV4/P2RY12/CCR2/KLRC4-KLRK1	20
BP	GO:0032615	interleukin-12 production	11/357	56/18670	7.39404e-09	2.0745e-07	1.66334e-07	CD40LG/CCR7/IRF8/IFNG/IL12B/JAK3/LTB/CCL19/TLR2/TLR8/TIGIT	11
BP	GO:0032611	interleukin-1 beta production	14/357	101/18670	7.7333e-09	2.15233e-07	1.72575e-07	CMA1/CCR7/IFI16/IFNG/CCL3/CCL19/TLR6/TLR8/NLRP2/SUCNR1/GBP5/PYHIN1/NLRP7/CARD17	14
BP	GO:0030101	natural killer cell activation	13/357	86/18670	9.09274e-09	2.51061e-07	2.01301e-07	CD2/IL12B/TOX/RASGRP1/KLRK1/PTPN22/IL21R/CD244/SLAMF7/ULBP1/ZNF683/NCR3/KLRC4-KLRK1	13
BP	GO:0002407	dendritic cell chemotaxis	8/357	24/18670	9.30616e-09	2.52938e-07	2.02807e-07	CCR1/CCR5/CCR7/PIK3CG/CCL5/CCL19/SLAMF8/CCR2	8
BP	GO:0050857	positive regulation of antigen receptor-mediated signaling pathway	8/357	24/18670	9.30616e-09	2.52938e-07	2.02807e-07	CCR7/KCNN4/LCK/PRKCB/TESPA1/CD226/STAP1/TRAT1	8
BP	GO:0002690	positive regulation of leukocyte chemotaxis	13/357	87/18670	1.05077e-08	2.83382e-07	2.27217e-07	CCR1/CCR7/FPR2/CXCL10/CCL3/CCL4/CCL5/CCL19/CXCL12/CXCL14/CXCL13/TRPV4/CCR2	13
BP	GO:0043368	positive T cell selection	9/357	34/18670	1.06334e-08	2.84567e-07	2.28167e-07	CD3D/CD3E/CD3G/IL12B/IRF4/ZAP70/TBX21/SLAMF6/THEMIS	9
BP	GO:0050852	T cell receptor signaling pathway	19/357	202/18670	1.25293e-08	3.32745e-07	2.66796e-07	CD3D/CD3E/CD3G/CD247/CCR7/CTLA4/GATA3/HLA-DRB5/ITK/KCNN4/LCK/PRKCQ/ZAP70/TESPA1/CD226/PTPN22/TRAT1/UBASH3A/THEMIS	19
BP	GO:0042089	cytokine biosynthetic process	15/357	123/18670	1.3475e-08	3.55149e-07	2.8476e-07	CD3E/CD80/TNFRSF8/CMA1/GATA3/IFNG/IL12B/IRF4/LAG3/LTB/PRKCQ/TLR6/TLR8/TNFRSF13C/CCR2	15
BP	GO:0042107	cytokine metabolic process	15/357	124/18670	1.50667e-08	3.94113e-07	3.16001e-07	CD3E/CD80/TNFRSF8/CMA1/GATA3/IFNG/IL12B/IRF4/LAG3/LTB/PRKCQ/TLR6/TLR8/TNFRSF13C/CCR2	15
BP	GO:0043370	regulation of CD4-positive, alpha-beta T cell differentiation	10/357	47/18670	1.59124e-08	4.13129e-07	3.31248e-07	RUNX1/RUNX3/CD80/GATA3/IFNG/IL12B/IRF4/JAK3/CCL19/TBX21	10
BP	GO:0046635	positive regulation of alpha-beta T cell activation	11/357	62/18670	2.27809e-08	5.87072e-07	4.70717e-07	RUNX1/RUNX3/CD3E/CD80/CD55/IFNG/IL12B/PRKCQ/CCL19/ZAP70/CCR2	11
BP	GO:0070233	negative regulation of T cell apoptotic process	7/357	18/18670	2.3402e-08	5.98643e-07	4.79994e-07	CD27/IL7R/JAK3/PRKCQ/CCL5/DOCK8/PTCRA	7
BP	GO:0050853	B cell receptor signaling pathway	15/357	129/18670	2.59091e-08	6.57939e-07	5.27537e-07	RUNX1/CD19/MS4A1/CD22/CD38/CD79A/CTLA4/ITK/LCK/PRKCB/PTPN22/STAP1/FCRL3/GCSAM/IGLL5	15
BP	GO:0045621	positive regulation of lymphocyte differentiation	13/357	94/18670	2.74217e-08	6.91306e-07	5.54291e-07	RUNX1/RUNX3/CD27/CD80/GATA3/IFNG/IL7R/IL12B/CCL19/ZAP70/TOX/TESPA1/RASGRP1	13
BP	GO:0019932	second-messenger-mediated signaling	28/357	439/18670	2.86547e-08	7.17193e-07	5.75048e-07	ANK2/CD3E/CD22/CCR1/CCR4/CCR5/CCR7/CCR8/FPR1/FPR2/NR5A2/XCR1/CXCR3/CXCL10/CXCL9/NFATC1/PLEK/PTGER2/CCL3/CCL4/CXCL11/VCAM1/ZAP70/S1PR4/CXCR6/TRAT1/P2RY12/CCR2	28
BP	GO:0010818	T cell chemotaxis	8/357	28/18670	3.67847e-08	9.14099e-07	7.32928e-07	CXCR3/CXCL10/PIK3CG/CCL3/CCL5/CXCL11/CXCL13/CCR2	8
BP	GO:0042035	regulation of cytokine biosynthetic process	14/357	114/18670	3.76623e-08	9.29271e-07	7.45092e-07	CD3E/CD80/TNFRSF8/GATA3/IFNG/IL12B/IRF4/LAG3/LTB/PRKCQ/TLR6/TLR8/TNFRSF13C/CCR2	14
BP	GO:0032612	interleukin-1 production	14/357	115/18670	4.21497e-08	1.03267e-06	8.27996e-07	CMA1/CCR7/IFI16/IFNG/CCL3/CCL19/TLR6/TLR8/NLRP2/SUCNR1/GBP5/PYHIN1/NLRP7/CARD17	14
BP	GO:0050855	regulation of B cell receptor signaling pathway	8/357	29/18670	4.99563e-08	1.21537e-06	9.74488e-07	RUNX1/CD19/CD22/PRKCB/PTPN22/STAP1/FCRL3/GCSAM	8
BP	GO:0050714	positive regulation of protein secretion	21/357	268/18670	5.32588e-08	1.28672e-06	1.03169e-06	CD2/CD38/FCN1/GATA3/IFNG/KCNN4/CCL3/CCL19/TLR2/RASGRP1/PTPN22/CLEC4E/ANKRD1/TLR8/CD244/NLRP2/CRTAM/TRPV4/CRLF2/NLRP7/CLEC9A	21
BP	GO:0045582	positive regulation of T cell differentiation	12/357	83/18670	5.68895e-08	1.36495e-06	1.09443e-06	RUNX1/RUNX3/CD27/CD80/GATA3/IFNG/IL7R/IL12B/CCL19/ZAP70/TESPA1/RASGRP1	12
BP	GO:0002285	lymphocyte activation involved in immune response	17/357	181/18670	7.54973e-08	1.79901e-06	1.44245e-06	CD1C/CD19/CD80/CD40LG/GATA3/ICAM1/IFNG/IL12B/IRF4/JAK3/CCL19/ITM2A/CLEC4E/TBX21/CD244/SLAMF6/ZNF683	17
BP	GO:0033077	T cell differentiation in thymus	11/357	70/18670	8.46054e-08	2.00233e-06	1.60547e-06	CAMK4/CD3D/CD3E/CD3G/CCR7/GATA3/IL7R/WNT1/ZAP70/TESPA1/RASGRP1	11
BP	GO:0071887	leukocyte apoptotic process	13/357	104/18670	9.37701e-08	2.20423e-06	1.76736e-06	CD3G/CD27/CCR5/CCR7/IL7R/JAK3/PDCD1/PRKCQ/CCL5/CCL19/CXCL12/DOCK8/PTCRA	13
BP	GO:0001771	immunological synapse formation	6/357	14/18670	1.23681e-07	2.86857e-06	2.30003e-06	CD6/CCR7/MSN/PRF1/CCL19/DOCK8	6
BP	GO:0050862	positive regulation of T cell receptor signaling pathway	6/357	14/18670	1.23681e-07	2.86857e-06	2.30003e-06	CCR7/KCNN4/LCK/TESPA1/CD226/TRAT1	6
BP	GO:0050708	regulation of protein secretion	28/357	472/18670	1.30891e-07	3.0157e-06	2.418e-06	CD2/CD22/CD38/CD40LG/CCR7/FCN1/GATA3/IFNG/KCNN4/CCL3/CCL5/CCL19/TLR2/RASGRP1/TLR6/PTPN22/CLEC4E/ANKRD1/TLR8/CD244/BANK1/NLRP2/CRTAM/TRPV4/CRLF2/NLRP7/CLEC9A/CARD17	28
BP	GO:0070232	regulation of T cell apoptotic process	8/357	33/18670	1.51157e-07	3.4597e-06	2.774e-06	CD27/IL7R/JAK3/PDCD1/PRKCQ/CCL5/DOCK8/PTCRA	8
BP	GO:0002793	positive regulation of peptide secretion	21/357	288/18670	1.8061e-07	4.10682e-06	3.29286e-06	CD2/CD38/FCN1/GATA3/IFNG/KCNN4/CCL3/CCL19/TLR2/RASGRP1/PTPN22/CLEC4E/ANKRD1/TLR8/CD244/NLRP2/CRTAM/TRPV4/CRLF2/NLRP7/CLEC9A	21
BP	GO:0050727	regulation of inflammatory response	28/357	485/18670	2.28514e-07	5.16234e-06	4.13918e-06	BIRC3/CD6/CD19/CMA1/CCR7/CR2/CD55/FPR2/GATA3/CFH/IL12B/PIK3CG/CCL3/CCL5/CCL18/CCL24/TLR2/CST7/SOCS3/TLR6/STAP1/SUCNR1/SLAMF8/TRPV4/GBP5/NLRP7/CCL3L3/CCR2	28
BP	GO:0032735	positive regulation of interleukin-12 production	8/357	35/18670	2.47823e-07	5.56242e-06	4.45997e-06	CD40LG/CCR7/IRF8/IFNG/IL12B/LTB/CCL19/TLR2	8
BP	GO:0050729	positive regulation of inflammatory response	15/357	153/18670	2.53817e-07	5.66044e-06	4.53856e-06	CD6/CCR7/IL12B/PIK3CG/CCL3/CCL18/CCL24/TLR2/TLR6/STAP1/SUCNR1/TRPV4/GBP5/CCL3L3/CCR2	15
BP	GO:0032623	interleukin-2 production	10/357	62/18670	2.56147e-07	5.67603e-06	4.55106e-06	RUNX1/CD3E/CD247/CD80/GATA3/IRF4/LAG3/PRKCQ/TBX21/CCR2	10
BP	GO:0002695	negative regulation of leukocyte activation	16/357	175/18670	2.65005e-07	5.83514e-06	4.67863e-06	RUNX1/RUNX3/CD80/CTLA4/JAK3/LAG3/CST7/TNFRSF13B/PTPN22/PLA2G2D/TBX21/LAX1/BANK1/PDCD1LG2/TIGIT/CCR2	16
BP	GO:0090025	regulation of monocyte chemotaxis	7/357	25/18670	3.14942e-07	6.89109e-06	5.5253e-06	CCR1/FPR2/CXCL10/CCL5/CXCL12/SLAMF8/CCR2	7
BP	GO:0002791	regulation of peptide secretion	28/357	500/18670	4.23308e-07	9.20429e-06	7.38003e-06	CD2/CD22/CD38/CD40LG/CCR7/FCN1/GATA3/IFNG/KCNN4/CCL3/CCL5/CCL19/TLR2/RASGRP1/TLR6/PTPN22/CLEC4E/ANKRD1/TLR8/CD244/BANK1/NLRP2/CRTAM/TRPV4/CRLF2/NLRP7/CLEC9A/CARD17	28
BP	GO:0002824	positive regulation of adaptive immune response based on somatic recombination of immune receptors built from immunoglobulin superfamily domains	12/357	100/18670	4.61142e-07	9.96468e-06	7.98971e-06	CD1B/CD1C/CD1E/CD80/GATA3/IL12B/PRKCQ/CCL19/CD226/TBX21/TNFRSF13C/CCR2	12
BP	GO:0050856	regulation of T cell receptor signaling pathway	8/357	39/18670	6.06008e-07	1.30142e-05	1.04348e-05	CCR7/KCNN4/LCK/TESPA1/CD226/PTPN22/TRAT1/UBASH3A	8
BP	GO:0002292	T cell differentiation involved in immune response	10/357	68/18670	6.25686e-07	1.33544e-05	1.07076e-05	CD80/GATA3/IFNG/IL12B/IRF4/JAK3/CCL19/CLEC4E/TBX21/SLAMF6	10
BP	GO:0006968	cellular defense response	9/357	53/18670	6.52296e-07	1.36707e-05	1.09612e-05	CCR5/ITK/KIR2DL4/KLRC2/SH2D1A/CXCL9/PRF1/TRAT1/CCR2	9
BP	GO:0050702	interleukin-1 beta secretion	9/357	53/18670	6.52296e-07	1.36707e-05	1.09612e-05	CCR7/CCL3/CCL19/TLR6/TLR8/NLRP2/GBP5/NLRP7/CARD17	9
BP	GO:0070228	regulation of lymphocyte apoptotic process	9/357	53/18670	6.52296e-07	1.36707e-05	1.09612e-05	CD3G/CD27/IL7R/JAK3/PDCD1/PRKCQ/CCL5/DOCK8/PTCRA	9
BP	GO:1902107	positive regulation of leukocyte differentiation	14/357	144/18670	7.07254e-07	1.46863e-05	1.17755e-05	RUNX1/RUNX3/CD27/CD80/CCR1/GATA3/IFNG/IL7R/IL12B/CCL19/ZAP70/TOX/TESPA1/RASGRP1	14
BP	GO:0070838	divalent metal ion transport	27/357	483/18670	7.09198e-07	1.46863e-05	1.17755e-05	ANK2/ATP2A3/CD19/MS4A1/CCR1/CCR5/CCR7/ICAM1/IFNG/CXCL10/KCNN4/LCK/CXCL9/PIK3CG/PRKCB/CCL3/CCL4/CCL5/CCL19/CXCL11/CXCL12/SLC30A2/CACNA1I/TRPV4/P2RY12/CRACR2A/FCRL3	27
BP	GO:0090026	positive regulation of monocyte chemotaxis	6/357	18/18670	7.16588e-07	1.47515e-05	1.18278e-05	CCR1/FPR2/CXCL10/CCL5/CXCL12/CCR2	6
BP	GO:0002822	regulation of adaptive immune response based on somatic recombination of immune receptors built from immunoglobulin superfamily domains	14/357	145/18670	7.69475e-07	1.56595e-05	1.25558e-05	CD1B/CD1C/CD1E/CD80/GATA3/IL7R/IL12B/JAK3/PRKCQ/CCL19/CD226/TBX21/TNFRSF13C/CCR2	14
BP	GO:0032663	regulation of interleukin-2 production	9/357	54/18670	7.69695e-07	1.56595e-05	1.25558e-05	RUNX1/CD3E/CD80/GATA3/IRF4/LAG3/PRKCQ/TBX21/CCR2	9
BP	GO:0002821	positive regulation of adaptive immune response	12/357	105/18670	7.86521e-07	1.59088e-05	1.27557e-05	CD1B/CD1C/CD1E/CD80/GATA3/IL12B/PRKCQ/CCL19/CD226/TBX21/TNFRSF13C/CCR2	12
BP	GO:1903532	positive regulation of secretion by cell	24/357	399/18670	8.27802e-07	1.6647e-05	1.33476e-05	CD2/CD38/FCN1/GATA3/IFNG/KCNN4/CCL3/CCL19/CXCL12/TLR2/CACNA1I/RASGRP1/PTPN22/CLEC4E/ANKRD1/TLR8/CD244/SMPD3/NLRP2/CRTAM/TRPV4/CRLF2/NLRP7/CLEC9A	24
BP	GO:0051250	negative regulation of lymphocyte activation	14/357	146/18670	8.36558e-07	1.67263e-05	1.34112e-05	RUNX1/RUNX3/CD80/CTLA4/JAK3/LAG3/TNFRSF13B/PTPN22/PLA2G2D/TBX21/LAX1/BANK1/PDCD1LG2/TIGIT	14
BP	GO:0002286	T cell activation involved in immune response	12/357	106/18670	8.71882e-07	1.7333e-05	1.38977e-05	CD1C/CD80/GATA3/ICAM1/IFNG/IL12B/IRF4/JAK3/CCL19/CLEC4E/TBX21/SLAMF6	12
BP	GO:0070374	positive regulation of ERK1 and ERK2 cascade	17/357	215/18670	8.8671e-07	1.75276e-05	1.40537e-05	CHI3L1/CCR1/CCR7/FPR2/ICAM1/CCL3/CCL4/CCL5/CCL18/CCL19/CCL22/CCL24/RASGRP1/PTPN22/TRPV4/CCL4L1/CCL3L3	17
BP	GO:0072511	divalent inorganic cation transport	27/357	489/18670	9.00023e-07	1.76903e-05	1.41841e-05	ANK2/ATP2A3/CD19/MS4A1/CCR1/CCR5/CCR7/ICAM1/IFNG/CXCL10/KCNN4/LCK/CXCL9/PIK3CG/PRKCB/CCL3/CCL4/CCL5/CCL19/CXCL11/CXCL12/SLC30A2/CACNA1I/TRPV4/P2RY12/CRACR2A/FCRL3	27
BP	GO:0070229	negative regulation of lymphocyte apoptotic process	7/357	29/18670	9.57376e-07	1.86073e-05	1.49194e-05	CD27/IL7R/JAK3/PRKCQ/CCL5/DOCK8/PTCRA	7
BP	GO:0072606	interleukin-8 secretion	7/357	29/18670	9.57376e-07	1.86073e-05	1.49194e-05	CD2/CHI3L1/FCN1/TLR2/TLR6/PTPN22/CD244	7
BP	GO:0006816	calcium ion transport	25/357	434/18670	1.07595e-06	2.07957e-05	1.6674e-05	ANK2/ATP2A3/CD19/MS4A1/CCR1/CCR5/CCR7/ICAM1/CXCL10/KCNN4/LCK/CXCL9/PIK3CG/PRKCB/CCL3/CCL4/CCL5/CCL19/CXCL11/CXCL12/CACNA1I/TRPV4/P2RY12/CRACR2A/FCRL3	25
BP	GO:1903038	negative regulation of leukocyte cell-cell adhesion	13/357	129/18670	1.17459e-06	2.25767e-05	1.81021e-05	RUNX1/RUNX3/CD80/CTLA4/JAK3/LAG3/CXCL12/PTPN22/PLA2G2D/TBX21/LAX1/PDCD1LG2/TIGIT	13
BP	GO:0009615	response to virus	21/357	326/18670	1.37725e-06	2.63267e-05	2.11089e-05	BIRC3/GATA3/IFI16/IFNG/IL12B/CXCL10/ISG20/CXCL9/PRF1/CCL4/CCL5/CCL19/CCL22/CXCL12/STAT1/IFITM1/TRIM22/TBX21/TLR8/NLRC5/APOBEC3D	21
BP	GO:0030183	B cell differentiation	13/357	131/18670	1.39999e-06	2.6615e-05	2.134e-05	CD19/MS4A1/CD27/CD40LG/CD79A/CR2/ITGA4/JAK3/VCAM1/ITM2A/IKZF3/SLAMF8/FCRL3	13
BP	GO:0050866	negative regulation of cell activation	16/357	199/18670	1.49323e-06	2.82333e-05	2.26376e-05	RUNX1/RUNX3/CD80/CTLA4/JAK3/LAG3/CST7/TNFRSF13B/PTPN22/PLA2G2D/TBX21/LAX1/BANK1/PDCD1LG2/TIGIT/CCR2	16
BP	GO:2000406	positive regulation of T cell migration	7/357	31/18670	1.56073e-06	2.93502e-05	2.35331e-05	CXCL10/ITGA4/CCL5/CXCL12/CXCL13/DOCK8/CCR2	7
BP	GO:0050868	negative regulation of T cell activation	12/357	112/18670	1.57916e-06	2.95372e-05	2.3683e-05	RUNX1/RUNX3/CD80/CTLA4/JAK3/LAG3/PTPN22/PLA2G2D/TBX21/LAX1/PDCD1LG2/TIGIT	12
BP	GO:0002294	CD4-positive, alpha-beta T cell differentiation involved in immune response	9/357	60/18670	1.9343e-06	3.59862e-05	2.88539e-05	CD80/GATA3/IFNG/IL12B/IRF4/JAK3/CCL19/TBX21/SLAMF6	9
BP	GO:0045061	thymic T cell selection	6/357	21/18670	1.99535e-06	3.6536e-05	2.92947e-05	CD3D/CD3E/CD3G/CCR7/GATA3/ZAP70	6
BP	GO:0048245	eosinophil chemotaxis	6/357	21/18670	1.99535e-06	3.6536e-05	2.92947e-05	CCL3/CCL4/CCL5/CCL22/CCL24/CCL4L1	6
BP	GO:0140131	positive regulation of lymphocyte chemotaxis	6/357	21/18670	1.99535e-06	3.6536e-05	2.92947e-05	CCL3/CCL4/CCL5/CXCL14/CXCL13/CCR2	6
BP	GO:0022408	negative regulation of cell-cell adhesion	15/357	181/18670	2.18006e-06	3.97091e-05	3.18389e-05	RUNX1/RUNX3/CD80/CTLA4/JAK3/LAG3/CXCL12/WNT1/PTPN22/PLA2G2D/TBX21/LAX1/TRPV4/PDCD1LG2/TIGIT	15
BP	GO:0002287	alpha-beta T cell activation involved in immune response	9/357	61/18670	2.23126e-06	4.00132e-05	3.20827e-05	CD80/GATA3/IFNG/IL12B/IRF4/JAK3/CCL19/TBX21/SLAMF6	9
BP	GO:0002293	alpha-beta T cell differentiation involved in immune response	9/357	61/18670	2.23126e-06	4.00132e-05	3.20827e-05	CD80/GATA3/IFNG/IL12B/IRF4/JAK3/CCL19/TBX21/SLAMF6	9
BP	GO:0050701	interleukin-1 secretion	9/357	61/18670	2.23126e-06	4.00132e-05	3.20827e-05	CCR7/CCL3/CCL19/TLR6/TLR8/NLRP2/GBP5/NLRP7/CARD17	9
BP	GO:0071675	regulation of mononuclear cell migration	8/357	46/18670	2.28722e-06	4.08063e-05	3.27187e-05	CCR1/FPR2/CXCL10/CCL5/CXCL12/SLAMF8/TRPV4/CCR2	8
BP	GO:0002819	regulation of adaptive immune response	14/357	160/18670	2.51059e-06	4.4563e-05	3.57308e-05	CD1B/CD1C/CD1E/CD80/GATA3/IL7R/IL12B/JAK3/PRKCQ/CCL19/CD226/TBX21/TNFRSF13C/CCR2	14
BP	GO:0070231	T cell apoptotic process	8/357	47/18670	2.71088e-06	4.78738e-05	3.83854e-05	CD27/IL7R/JAK3/PDCD1/PRKCQ/CCL5/DOCK8/PTCRA	8
BP	GO:0002440	production of molecular mediator of immune response	19/357	286/18670	2.80587e-06	4.93011e-05	3.95298e-05	CD22/CD40LG/CD55/GATA3/IL7R/IL12B/JAK3/KIR2DL4/TLR2/IL18RAP/ITM2A/CD96/CD226/TBX21/MZB1/CD244/LAX1/FCRL3/CCR2	19
BP	GO:0051047	positive regulation of secretion	24/357	428/18670	2.8276e-06	4.94333e-05	3.96358e-05	CD2/CD38/FCN1/GATA3/IFNG/KCNN4/CCL3/CCL19/CXCL12/TLR2/CACNA1I/RASGRP1/PTPN22/CLEC4E/ANKRD1/TLR8/CD244/SMPD3/NLRP2/CRTAM/TRPV4/CRLF2/NLRP7/CLEC9A	24
BP	GO:1903708	positive regulation of hemopoiesis	15/357	185/18670	2.86196e-06	4.97839e-05	3.99169e-05	RUNX1/RUNX3/CD27/CD80/CCR1/GATA3/IFNG/IL7R/IL12B/CCL19/STAT1/ZAP70/TOX/TESPA1/RASGRP1	15
BP	GO:0045066	regulatory T cell differentiation	7/357	34/18670	3.03921e-06	5.26041e-05	4.21782e-05	RUNX1/CTLA4/FUT7/IFNG/LAG3/TNFRSF18/PLA2G2D	7
BP	GO:0001774	microglial cell activation	8/357	48/18670	3.19935e-06	5.48302e-05	4.3963e-05	FPR2/IFNG/CCL3/TLR2/CST7/TLR6/STAP1/TLR8	8
BP	GO:0002269	leukocyte activation involved in inflammatory response	8/357	48/18670	3.19935e-06	5.48302e-05	4.3963e-05	FPR2/IFNG/CCL3/TLR2/CST7/TLR6/STAP1/TLR8	8
BP	GO:0001913	T cell mediated cytotoxicity	8/357	49/18670	3.7605e-06	6.41312e-05	5.14206e-05	CD1B/CD1C/CD1E/GZMM/IL7R/IL12B/PRF1/ULBP1	8
BP	GO:0002367	cytokine production involved in immune response	11/357	102/18670	4.03833e-06	6.85334e-05	5.49503e-05	CD55/GATA3/IL12B/JAK3/KIR2DL4/TLR2/IL18RAP/CD96/CD226/TBX21/CCR2	11
BP	GO:0071677	positive regulation of mononuclear cell migration	6/357	24/18670	4.71488e-06	7.96266e-05	6.38448e-05	CCR1/FPR2/CXCL10/CCL5/CXCL12/CCR2	6
BP	GO:0032731	positive regulation of interleukin-1 beta production	8/357	52/18670	5.96954e-06	0.000100329	8.04439e-05	IFI16/IFNG/CCL3/CCL19/TLR8/NLRP2/PYHIN1/NLRP7	8
BP	GO:0072677	eosinophil migration	6/357	25/18670	6.10434e-06	0.000101612	8.14731e-05	CCL3/CCL4/CCL5/CCL22/CCL24/CCL4L1	6
BP	GO:2000482	regulation of interleukin-8 secretion	6/357	25/18670	6.10434e-06	0.000101612	8.14731e-05	CD2/FCN1/TLR2/TLR6/PTPN22/CD244	6
BP	GO:0050777	negative regulation of immune response	13/357	150/18670	6.36955e-06	0.00010511	8.42775e-05	CTLA4/CD55/IFI16/IL7R/IL12B/JAK3/KIR2DL4/PDCD1/CD96/TBX21/SLAMF8/NLRC5/CCR2	13
BP	GO:0070227	lymphocyte apoptotic process	9/357	69/18670	6.37488e-06	0.00010511	8.42775e-05	CD3G/CD27/IL7R/JAK3/PDCD1/PRKCQ/CCL5/DOCK8/PTCRA	9
BP	GO:0032651	regulation of interleukin-1 beta production	10/357	90/18670	8.48379e-06	0.000139222	0.000111629	CCR7/IFI16/IFNG/CCL3/CCL19/TLR8/NLRP2/PYHIN1/NLRP7/CARD17	10
BP	GO:0060333	interferon-gamma-mediated signaling pathway	10/357	91/18670	9.37146e-06	0.000153067	0.00012273	HLA-DRB5/ICAM1/IRF8/IFNG/IRF4/STAT1/VCAM1/SOCS3/TRIM22/NLRC5	10
BP	GO:0070555	response to interleukin-1	15/357	207/18670	1.12607e-05	0.000183065	0.000146782	CD38/CHI3L1/ICAM1/CCL3/CCL4/CCL5/CCL18/CCL19/CCL22/CCL24/ANKRD1/TRIM63/NLRP7/CCL4L1/CCL3L3	15
BP	GO:0050864	regulation of B cell activation	14/357	184/18670	1.27169e-05	0.000205778	0.000164993	CD19/CD22/CD27/CD38/CTLA4/IKZF3/TNFRSF13B/TBX21/MZB1/BANK1/SLAMF8/FCRL3/TNFRSF13C/IGLL5	14
BP	GO:0042093	T-helper cell differentiation	8/357	58/18670	1.37617e-05	0.000220632	0.000176903	CD80/GATA3/IL12B/IRF4/JAK3/CCL19/TBX21/SLAMF6	8
BP	GO:0061900	glial cell activation	8/357	58/18670	1.37617e-05	0.000220632	0.000176903	FPR2/IFNG/CCL3/TLR2/CST7/TLR6/STAP1/TLR8	8
BP	GO:0002700	regulation of production of molecular mediator of immune response	12/357	139/18670	1.50217e-05	0.000239728	0.000192214	CD22/CD40LG/GATA3/JAK3/KIR2DL4/CD96/CD226/TBX21/MZB1/CD244/FCRL3/CCR2	12
BP	GO:0032732	positive regulation of interleukin-1 production	8/357	59/18670	1.56582e-05	0.000248743	0.000199443	IFI16/IFNG/CCL3/CCL19/TLR8/NLRP2/PYHIN1/NLRP7	8
BP	GO:0031334	positive regulation of protein complex assembly	17/357	268/18670	1.71175e-05	0.00027069	0.00021704	CCR7/DDB2/ICAM1/IFNG/MSN/PLEK/CCL24/WNT10B/TCL1A/HRK/TLR6/CXCL13/SPIRE1/P2RY12/ANKRD53/GBP5/CNOT6L	17
BP	GO:2000404	regulation of T cell migration	7/357	44/18670	1.83701e-05	0.000289183	0.000231868	CXCL10/ITGA4/CCL5/CXCL12/CXCL13/DOCK8/CCR2	7
BP	GO:0032743	positive regulation of interleukin-2 production	6/357	30/18670	1.88791e-05	0.000295858	0.00023722	RUNX1/CD3E/CD80/IRF4/PRKCQ/CCR2	6
BP	GO:0030888	regulation of B cell proliferation	8/357	61/18670	2.01149e-05	0.000313811	0.000251614	CD22/CD38/CTLA4/IKZF3/TNFRSF13B/MZB1/FCRL3/TNFRSF13C	8
BP	GO:0033209	tumor necrosis factor-mediated signaling pathway	13/357	167/18670	2.03262e-05	0.000315692	0.000253123	BIRC3/TNFRSF17/CD27/TNFRSF8/TNFSF8/CD40LG/CD70/TNFRSF9/LTB/STAT1/TNFRSF18/TNFRSF13B/TNFRSF13C	13
BP	GO:0045076	regulation of interleukin-2 biosynthetic process	5/357	19/18670	2.31788e-05	0.00035681	0.000286092	CD3E/CD80/IRF4/LAG3/PRKCQ	5
BP	GO:0046641	positive regulation of alpha-beta T cell proliferation	5/357	19/18670	2.31788e-05	0.00035681	0.000286092	CD3E/CD55/IL12B/ZAP70/CCR2	5
BP	GO:0051928	positive regulation of calcium ion transport	11/357	123/18670	2.44504e-05	0.000374726	0.000300457	ANK2/CD19/CCR1/CXCL10/CXCL9/CCL3/CCL4/CCL5/CXCL11/CXCL12/CRACR2A	11
BP	GO:0002437	inflammatory response to antigenic stimulus	7/357	46/18670	2.48307e-05	0.000377231	0.000302465	CD6/CCR7/GATA3/ICAM1/IL5RA/IL12B/RASGRP1	7
BP	GO:0050706	regulation of interleukin-1 beta secretion	7/357	46/18670	2.48307e-05	0.000377231	0.000302465	CCR7/CCL3/CCL19/TLR8/NLRP2/NLRP7/CARD17	7
BP	GO:0001768	establishment of T cell polarity	4/357	10/18670	2.52039e-05	0.000381236	0.000305676	CCR7/CCL19/CYP26B1/DOCK8	4
BP	GO:0032652	regulation of interleukin-1 production	10/357	103/18670	2.8091e-05	0.000423068	0.000339217	CCR7/IFI16/IFNG/CCL3/CCL19/TLR8/NLRP2/PYHIN1/NLRP7/CARD17	10
BP	GO:0046638	positive regulation of alpha-beta T cell differentiation	7/357	47/18670	2.87016e-05	0.000430401	0.000345097	RUNX1/RUNX3/CD80/IFNG/IL12B/CCL19/ZAP70	7
BP	GO:0032633	interleukin-4 production	6/357	33/18670	3.35523e-05	0.00050098	0.000401687	CD3E/CD40LG/GATA3/IRF4/ITK/PRKCQ	6
BP	GO:0032760	positive regulation of tumor necrosis factor production	9/357	86/18670	3.89016e-05	0.0005775	0.000463041	CD2/TNFRSF8/IFNG/IL12B/CCL3/CCL19/TLR2/RASGRP1/CCR2	9
BP	GO:0001767	establishment of lymphocyte polarity	4/357	11/18670	3.9009e-05	0.0005775	0.000463041	CCR7/CCL19/CYP26B1/DOCK8	4
BP	GO:0035743	CD4-positive, alpha-beta T cell cytokine production	5/357	21/18670	3.93057e-05	0.000579426	0.000464585	CD55/GATA3/IL12B/IL18RAP/TBX21	5
BP	GO:0071347	cellular response to interleukin-1	13/357	179/18670	4.21659e-05	0.000618967	0.00049629	CHI3L1/ICAM1/CCL3/CCL4/CCL5/CCL18/CCL19/CCL22/CCL24/ANKRD1/NLRP7/CCL4L1/CCL3L3	13
BP	GO:1903557	positive regulation of tumor necrosis factor superfamily cytokine production	9/357	88/18670	4.67424e-05	0.000683264	0.000547844	CD2/TNFRSF8/IFNG/IL12B/CCL3/CCL19/TLR2/RASGRP1/CCR2	9
BP	GO:0045622	regulation of T-helper cell differentiation	6/357	35/18670	4.76122e-05	0.000693067	0.000555703	CD80/IL12B/IRF4/JAK3/CCL19/TBX21	6
BP	GO:0033622	integrin activation	5/357	22/18670	5.00722e-05	0.000719839	0.000577169	PLEK/CXCL12/CXCL13/MZB1/P2RY12	5
BP	GO:0042094	interleukin-2 biosynthetic process	5/357	22/18670	5.00722e-05	0.000719839	0.000577169	CD3E/CD80/IRF4/LAG3/PRKCQ	5
BP	GO:0072643	interferon-gamma secretion	5/357	22/18670	5.00722e-05	0.000719839	0.000577169	CD2/GATA3/RASGRP1/PTPN22/CD244	5
BP	GO:0002709	regulation of T cell mediated immunity	8/357	70/18670	5.55405e-05	0.000791908	0.000634954	CD1B/CD1C/CD1E/GATA3/IL7R/IL12B/TBX21/CCR2	8
BP	GO:0034121	regulation of toll-like receptor signaling pathway	8/357	70/18670	5.55405e-05	0.000791908	0.000634954	BIRC3/GFI1/IRF4/TLR2/TLR6/LILRA4/PTPN22/FCRL3	8
BP	GO:0030099	myeloid cell differentiation	21/357	416/18670	5.58165e-05	0.000792332	0.000635294	CAMK4/RUNX1/CCR1/CCR7/GATA3/GP1BA/IRF8/IFI16/IFNG/IL12B/IRF4/JAK3/PRKCB/PRKCQ/CCL3/CCL19/STAT1/TLR2/RASSF2/GPR171/AHSP	21
BP	GO:2000516	positive regulation of CD4-positive, alpha-beta T cell activation	6/357	36/18670	5.6222e-05	0.000792332	0.000635294	CD80/CD55/IFNG/IL12B/PRKCQ/CCL19	6
BP	GO:0032653	regulation of interleukin-10 production	7/357	52/18670	5.62535e-05	0.000792332	0.000635294	CD40LG/IL12B/IRF4/JAK3/TLR2/PDCD1LG2/TIGIT	7
BP	GO:0043383	negative T cell selection	4/357	12/18670	5.7632e-05	0.000805228	0.000645635	CD3E/CCR7/ZAP70/THEMIS	4
BP	GO:0072540	T-helper 17 cell lineage commitment	4/357	12/18670	5.7632e-05	0.000805228	0.000645635	IL12B/IRF4/TBX21/SLAMF6	4
BP	GO:0051222	positive regulation of protein transport	21/357	418/18670	5.97755e-05	0.000831835	0.000666968	CD2/CD38/FCN1/GATA3/IFNG/KCNN4/CCL3/CCL19/TLR2/RASGRP1/PTPN22/CLEC4E/ANKRD1/TLR8/CD244/NLRP2/CRTAM/TRPV4/CRLF2/NLRP7/CLEC9A	21
BP	GO:0001818	negative regulation of cytokine production	17/357	296/18670	6.00873e-05	0.000832843	0.000667777	GATA3/IFNG/IL12B/JAK3/LAG3/CD96/TLR6/LILRA4/PTPN22/TBX21/TLR8/BANK1/PDCD1LG2/NLRC5/NLRP7/TIGIT/CARD17	17
BP	GO:0032753	positive regulation of interleukin-4 production	5/357	23/18670	6.29828e-05	0.000869513	0.000697178	CD3E/CD40LG/GATA3/IRF4/PRKCQ	5
BP	GO:0050704	regulation of interleukin-1 secretion	7/357	53/18670	6.37616e-05	0.000873332	0.000700241	CCR7/CCL3/CCL19/TLR8/NLRP2/NLRP7/CARD17	7
BP	GO:1905517	macrophage migration	7/357	53/18670	6.37616e-05	0.000873332	0.000700241	CCL3/CCL5/STAP1/SLAMF8/TRPV4/P2RY12/CCR2	7
BP	GO:0070372	regulation of ERK1 and ERK2 cascade	17/357	300/18670	7.0903e-05	0.00096734	0.000775616	CHI3L1/CCR1/CCR7/FPR2/ICAM1/CCL3/CCL4/CCL5/CCL18/CCL19/CCL22/CCL24/RASGRP1/PTPN22/TRPV4/CCL4L1/CCL3L3	17
BP	GO:0008037	cell recognition	14/357	215/18670	7.12017e-05	0.00096762	0.000775841	CD5/CD6/CCR7/FCN1/MSN/PRF1/CCL19/CD226/CRTAM/DOCK8/TEX101/ATP8B3/NCR3/IGLL5	14
BP	GO:1904951	positive regulation of establishment of protein localization	22/357	456/18670	7.2704e-05	0.000984191	0.000789128	CD2/CD38/FCN1/GATA3/GZMB/IFNG/KCNN4/CCL3/CCL19/TLR2/RASGRP1/PTPN22/CLEC4E/ANKRD1/TLR8/CD244/NLRP2/CRTAM/TRPV4/CRLF2/NLRP7/CLEC9A	22
BP	GO:0009988	cell-cell recognition	8/357	73/18670	7.52496e-05	0.0010147	0.000813592	CD6/CCR7/MSN/PRF1/CCL19/DOCK8/TEX101/ATP8B3	8
BP	GO:0032613	interleukin-10 production	7/357	55/18670	8.1239e-05	0.0010805	0.000866352	CD40LG/IL12B/IRF4/JAK3/TLR2/PDCD1LG2/TIGIT	7
BP	GO:0043551	regulation of phosphatidylinositol 3-kinase activity	7/357	55/18670	8.1239e-05	0.0010805	0.000866352	CD19/CCR7/FPR2/CCL19/SOCS3/P2RY12/PIK3IP1	7
BP	GO:0035589	G protein-coupled purinergic nucleotide receptor signaling pathway	4/357	13/18670	8.19929e-05	0.0010805	0.000866352	P2RY10/GPR171/P2RY13/P2RY12	4
BP	GO:0045059	positive thymic T cell selection	4/357	13/18670	8.19929e-05	0.0010805	0.000866352	CD3D/CD3E/CD3G/ZAP70	4
BP	GO:0045086	positive regulation of interleukin-2 biosynthetic process	4/357	13/18670	8.19929e-05	0.0010805	0.000866352	CD3E/CD80/IRF4/PRKCQ	4
BP	GO:1902713	regulation of interferon-gamma secretion	4/357	13/18670	8.19929e-05	0.0010805	0.000866352	CD2/RASGRP1/PTPN22/CD244	4
BP	GO:0042116	macrophage activation	9/357	95/18670	8.55074e-05	0.00112257	0.000900078	FPR2/IFNG/CCL3/TLR2/CST7/TLR6/STAP1/TLR8/SUCNR1	9
BP	GO:0097696	STAT cascade	12/357	166/18670	8.65759e-05	0.00113232	0.0009079	IFNG/IL7R/IL12B/JAK3/CCL5/STAT1/STAT4/TNFRSF18/SOCS3/IL24/CRLF2/CCR2	12
BP	GO:1905521	regulation of macrophage migration	6/357	39/18670	8.97353e-05	0.00116925	0.000937507	CCL3/CCL5/STAP1/SLAMF8/TRPV4/P2RY12	6
BP	GO:0150076	neuroinflammatory response	8/357	75/18670	9.13684e-05	0.00118608	0.000951006	FPR2/IFNG/CCL3/TLR2/CST7/TLR6/STAP1/TLR8	8
BP	GO:0050901	leukocyte tethering or rolling	5/357	25/18670	9.63695e-05	0.00124636	0.000999332	ADD2/ITGA4/CXCL12/VCAM1/CCR2	5
BP	GO:0002698	negative regulation of immune effector process	10/357	120/18670	0.000103783	0.00133366	0.00106933	CD22/CD55/IL7R/JAK3/KIR2DL4/CD96/TBX21/SLAMF8/FCRL3/CCR2	10
BP	GO:0002369	T cell cytokine production	6/357	40/18670	0.000103887	0.00133366	0.00106933	CD55/GATA3/IL12B/IL18RAP/TBX21/CCR2	6
BP	GO:0048525	negative regulation of viral process	9/357	99/18670	0.000117828	0.00150708	0.00120838	FCN1/IFI16/ISG20/CCL3/CCL4/CCL5/STAT1/IFITM1/APOBEC3D	9
BP	GO:0051924	regulation of calcium ion transport	15/357	254/18670	0.000119129	0.00151813	0.00121724	ANK2/CD19/CCR1/ICAM1/CXCL10/CXCL9/PIK3CG/CCL3/CCL4/CCL5/CXCL11/CXCL12/P2RY12/CRACR2A/FCRL3	15
BP	GO:0051209	release of sequestered calcium ion into cytosol	10/357	124/18670	0.00013641	0.00173201	0.00138873	ANK2/CD19/CCR5/CCR7/CXCL10/LCK/CXCL9/CCL3/CCL19/CXCL11	10
BP	GO:0070371	ERK1 and ERK2 cascade	17/357	317/18670	0.000138419	0.00175113	0.00140406	CHI3L1/CCR1/CCR7/FPR2/ICAM1/CCL3/CCL4/CCL5/CCL18/CCL19/CCL22/CCL24/RASGRP1/PTPN22/TRPV4/CCL4L1/CCL3L3	17
BP	GO:0002825	regulation of T-helper 1 type immune response	5/357	27/18670	0.000141905	0.00178226	0.00142902	CD80/IL12B/JAK3/CCL19/CCR2	5
BP	GO:0032673	regulation of interleukin-4 production	5/357	27/18670	0.000141905	0.00178226	0.00142902	CD3E/CD40LG/GATA3/IRF4/PRKCQ	5
BP	GO:0007162	negative regulation of cell adhesion	16/357	289/18670	0.000150663	0.00188157	0.00150865	RUNX1/RUNX3/CD80/CTLA4/JAK3/LAG3/CXCL12/WNT1/PTPN22/PLA2G2D/ADAMDEC1/TBX21/LAX1/TRPV4/PDCD1LG2/TIGIT	16
BP	GO:0051897	positive regulation of protein kinase B signaling	12/357	176/18670	0.000150893	0.00188157	0.00150865	CD19/CD80/CHI3L1/CCR7/GATA3/LCK/PIK3CG/CCL3/CCL19/ICOS/TRAT1/P2RY12	12
BP	GO:2000484	positive regulation of interleukin-8 secretion	4/357	15/18670	0.000151858	0.00188684	0.00151287	CD2/FCN1/TLR2/CD244	4
BP	GO:0051283	negative regulation of sequestering of calcium ion	10/357	126/18670	0.000155727	0.00192802	0.00154589	ANK2/CD19/CCR5/CCR7/CXCL10/LCK/CXCL9/CCL3/CCL19/CXCL11	10
BP	GO:0042088	T-helper 1 type immune response	6/357	43/18670	0.000157236	0.0019398	0.00155534	CD80/IL12B/JAK3/CCL19/IL18RAP/CCR2	6
BP	GO:0045123	cellular extravasation	7/357	61/18670	0.000158339	0.00194651	0.00156072	ADD2/ICAM1/ITGA4/PIK3CG/CXCL12/VCAM1/CCR2	7
BP	GO:0002573	myeloid leukocyte differentiation	13/357	204/18670	0.000159168	0.00194981	0.00156336	CAMK4/RUNX1/CCR1/CCR7/GATA3/IFI16/IFNG/IL12B/IRF4/CCL3/CCL19/TLR2/RASSF2	13
BP	GO:0032637	interleukin-8 production	8/357	82/18670	0.000171917	0.00209859	0.00168266	CD2/CHI3L1/FCN1/TLR2/TLR6/PTPN22/TLR8/CD244	8
BP	GO:0051282	regulation of sequestering of calcium ion	10/357	128/18670	0.000177299	0.00215673	0.00172927	ANK2/CD19/CCR5/CCR7/CXCL10/LCK/CXCL9/CCL3/CCL19/CXCL11	10
BP	GO:0061756	leukocyte adhesion to vascular endothelial cell	6/357	44/18670	0.000179162	0.00217179	0.00174135	ADD2/ICAM1/ITGA4/CXCL12/VCAM1/CCR2	6
BP	GO:0006959	humoral immune response	18/357	356/18670	0.000184676	0.00223086	0.00178871	CD19/MS4A1/CCR7/CR2/CD55/FCN1/GATA3/CFH/IFNG/CXCL10/SH2D1A/CXCL9/PDCD1/POU2AF1/CXCL11/CXCL13/CCR2/IGLL5	18
BP	GO:0002295	T-helper cell lineage commitment	4/357	16/18670	0.000199435	0.00239253	0.00191834	IL12B/IRF4/TBX21/SLAMF6	4
BP	GO:0033631	cell-cell adhesion mediated by integrin	4/357	16/18670	0.000199435	0.00239253	0.00191834	CD3E/ITGA4/CCL5/CXCL13	4
BP	GO:0072538	T-helper 17 type immune response	5/357	29/18670	0.000202297	0.00241852	0.00193918	IL12B/IRF4/PRKCQ/TBX21/SLAMF6	5
BP	GO:0045581	negative regulation of T cell differentiation	6/357	45/18670	0.000203433	0.00242378	0.00194339	RUNX1/RUNX3/CTLA4/JAK3/LAG3/TBX21	6
BP	GO:0051607	defense response to virus	14/357	238/18670	0.000207902	0.00246857	0.00197931	BIRC3/IFI16/IFNG/IL12B/CXCL10/ISG20/CXCL9/PRF1/STAT1/IFITM1/TRIM22/TLR8/NLRC5/APOBEC3D	14
BP	GO:0051208	sequestering of calcium ion	10/357	131/18670	0.000214339	0.00253186	0.00203005	ANK2/CD19/CCR5/CCR7/CXCL10/LCK/CXCL9/CCL3/CCL19/CXCL11	10
BP	GO:0043550	regulation of lipid kinase activity	7/357	64/18670	0.000214687	0.00253186	0.00203005	CD19/CCR7/FPR2/CCL19/SOCS3/P2RY12/PIK3IP1	7
BP	GO:0043491	protein kinase B signaling	15/357	269/18670	0.000223031	0.00262137	0.00210182	CD19/CD80/CHI3L1/CCR7/GATA3/LCK/PIK3CG/CCL3/CCL5/CCL19/ICOS/TRAT1/BANK1/SMPD3/P2RY12	15
BP	GO:0060402	calcium ion transport into cytosol	11/357	158/18670	0.000235755	0.00276158	0.00221425	ANK2/CD19/MS4A1/CCR5/CCR7/CXCL10/LCK/CXCL9/CCL3/CCL19/CXCL11	11
BP	GO:0046640	regulation of alpha-beta T cell proliferation	5/357	30/18670	0.00023898	0.00278997	0.00223701	CD3E/CD55/IL12B/ZAP70/CCR2	5
BP	GO:0002418	immune response to tumor cell	4/357	17/18670	0.000256882	0.00295925	0.00237274	IL12B/PRF1/CD226/CRTAM	4
BP	GO:0010819	regulation of T cell chemotaxis	4/357	17/18670	0.000256882	0.00295925	0.00237274	CXCL10/CCL5/CXCL13/CCR2	4
BP	GO:0043373	CD4-positive, alpha-beta T cell lineage commitment	4/357	17/18670	0.000256882	0.00295925	0.00237274	IL12B/IRF4/TBX21/SLAMF6	4
BP	GO:1903975	regulation of glial cell migration	4/357	17/18670	0.000256882	0.00295925	0.00237274	CCL3/STAP1/P2RY12/CCR2	4
BP	GO:0032680	regulation of tumor necrosis factor production	11/357	160/18670	0.000262938	0.00301901	0.00242065	CD2/TNFRSF8/IFNG/IL12B/CCL3/CCL19/TLR2/RASGRP1/LILRA4/PTPN22/CCR2	11
BP	GO:0043270	positive regulation of ion transport	15/357	275/18670	0.000282624	0.00323437	0.00259333	ANK2/CD19/CCR1/IFNG/CXCL10/CXCL9/CCL3/CCL4/CCL5/CXCL11/CXCL12/ATP8A2/P2RY12/CRACR2A/CCR2	15
BP	GO:0048872	homeostasis of number of cells	14/357	246/18670	0.000291777	0.00332817	0.00266854	TNFRSF17/CCR4/CCR7/GATA3/IL7R/JAK3/STAT1/RASSF2/TNFRSF13B/SIT1/AHSP/GPR174/TNFRSF13C/CCR2	14
BP	GO:0032640	tumor necrosis factor production	11/357	163/18670	0.000308647	0.00349767	0.00280444	CD2/TNFRSF8/IFNG/IL12B/CCL3/CCL19/TLR2/RASGRP1/LILRA4/PTPN22/CCR2	11
BP	GO:1903555	regulation of tumor necrosis factor superfamily cytokine production	11/357	163/18670	0.000308647	0.00349767	0.00280444	CD2/TNFRSF8/IFNG/IL12B/CCL3/CCL19/TLR2/RASGRP1/LILRA4/PTPN22/CCR2	11
BP	GO:0033627	cell adhesion mediated by integrin	7/357	68/18670	0.000313874	0.00354534	0.00284267	CD3E/ICAM1/ITGA4/PIK3CG/CCL5/CXCL13/P2RY12	7
BP	GO:0032814	regulation of natural killer cell activation	5/357	32/18670	0.000327288	0.00364081	0.00291921	IL12B/TOX/RASGRP1/PTPN22/ZNF683	5
BP	GO:0043552	positive regulation of phosphatidylinositol 3-kinase activity	5/357	32/18670	0.000327288	0.00364081	0.00291921	CD19/CCR7/FPR2/CCL19/P2RY12	5
BP	GO:0045589	regulation of regulatory T cell differentiation	5/357	32/18670	0.000327288	0.00364081	0.00291921	RUNX1/CTLA4/IFNG/LAG3/TNFRSF18	5
BP	GO:0002686	negative regulation of leukocyte migration	6/357	49/18670	0.000327558	0.00364081	0.00291921	CXCL12/KLRK1/STAP1/SLAMF8/GCSAM/KLRC4-KLRK1	6
BP	GO:0002704	negative regulation of leukocyte mediated immunity	6/357	49/18670	0.000327558	0.00364081	0.00291921	IL7R/JAK3/KIR2DL4/CD96/TBX21/CCR2	6
BP	GO:0050731	positive regulation of peptidyl-tyrosine phosphorylation	12/357	192/18670	0.000337513	0.00373952	0.00299836	CD3E/CD80/ICAM1/IFNG/IL12B/CCL5/TNFRSF18/SOCS3/IL24/STAP1/BANK1/DOK7	12
BP	GO:0097553	calcium ion transmembrane import into cytosol	10/357	140/18670	0.000366526	0.00404808	0.00324576	ANK2/CD19/CCR5/CCR7/CXCL10/LCK/CXCL9/CCL3/CCL19/CXCL11	10
BP	GO:0001914	regulation of T cell mediated cytotoxicity	5/357	33/18670	0.00037974	0.00415123	0.00332847	CD1B/CD1C/CD1E/IL7R/IL12B	5
BP	GO:0046633	alpha-beta T cell proliferation	5/357	33/18670	0.00037974	0.00415123	0.00332847	CD3E/CD55/IL12B/ZAP70/CCR2	5
BP	GO:0050718	positive regulation of interleukin-1 beta secretion	5/357	33/18670	0.00037974	0.00415123	0.00332847	CCL3/CCL19/TLR8/NLRP2/NLRP7	5
BP	GO:1904894	positive regulation of STAT cascade	8/357	92/18670	0.000380639	0.00415123	0.00332847	IFNG/IL7R/IL12B/CCL5/TNFRSF18/SOCS3/IL24/CRLF2	8
BP	GO:0070588	calcium ion transmembrane transport	16/357	315/18670	0.000396153	0.00430693	0.00345331	ANK2/ATP2A3/CD19/CCR5/CCR7/CXCL10/LCK/CXCL9/PIK3CG/CCL3/CCL19/CXCL11/CACNA1I/TRPV4/P2RY12/CRACR2A	16
BP	GO:0071706	tumor necrosis factor superfamily cytokine production	11/357	168/18670	0.000399665	0.00433158	0.00347307	CD2/TNFRSF8/IFNG/IL12B/CCL3/CCL19/TLR2/RASGRP1/LILRA4/PTPN22/CCR2	11
BP	GO:0002363	alpha-beta T cell lineage commitment	4/357	19/18670	0.000405891	0.00437181	0.00350533	IL12B/IRF4/TBX21/SLAMF6	4
BP	GO:0002689	negative regulation of leukocyte chemotaxis	4/357	19/18670	0.000405891	0.00437181	0.00350533	KLRK1/STAP1/SLAMF8/KLRC4-KLRK1	4
BP	GO:0002532	production of molecular mediator involved in inflammatory response	7/357	72/18670	0.000446855	0.00479818	0.00384719	ALOX5/CD6/CD96/TLR6/SLAMF8/GBP5/NLRP7	7
BP	GO:0060401	cytosolic calcium ion transport	11/357	171/18670	0.000464376	0.00497097	0.00398574	ANK2/CD19/MS4A1/CCR5/CCR7/CXCL10/LCK/CXCL9/CCL3/CCL19/CXCL11	11
BP	GO:0002827	positive regulation of T-helper 1 type immune response	4/357	20/18670	0.000499758	0.00526866	0.00422443	CD80/IL12B/CCL19/CCR2	4
BP	GO:0033630	positive regulation of cell adhesion mediated by integrin	4/357	20/18670	0.000499758	0.00526866	0.00422443	CD3E/CCL5/CXCL13/P2RY12	4
BP	GO:0043369	CD4-positive or CD8-positive, alpha-beta T cell lineage commitment	4/357	20/18670	0.000499758	0.00526866	0.00422443	IL12B/IRF4/TBX21/SLAMF6	4
BP	GO:0043371	negative regulation of CD4-positive, alpha-beta T cell differentiation	4/357	20/18670	0.000499758	0.00526866	0.00422443	RUNX1/RUNX3/JAK3/TBX21	4
BP	GO:1905523	positive regulation of macrophage migration	4/357	20/18670	0.000499758	0.00526866	0.00422443	CCL3/CCL5/TRPV4/P2RY12	4
BP	GO:0002701	negative regulation of production of molecular mediator of immune response	5/357	35/18670	0.000503415	0.00529118	0.00424249	CD22/JAK3/CD96/TBX21/FCRL3	5
BP	GO:0032677	regulation of interleukin-8 production	7/357	74/18670	0.000528402	0.00553708	0.00443965	CD2/FCN1/TLR2/TLR6/PTPN22/TLR8/CD244	7
BP	GO:0032733	positive regulation of interleukin-10 production	5/357	36/18670	0.000575543	0.00599495	0.00480677	CD40LG/IL12B/IRF4/TLR2/TIGIT	5
BP	GO:0090218	positive regulation of lipid kinase activity	5/357	36/18670	0.000575543	0.00599495	0.00480677	CD19/CCR7/FPR2/CCL19/P2RY12	5
BP	GO:0002438	acute inflammatory response to antigenic stimulus	4/357	21/18670	0.0006081	0.00629637	0.00504845	CD6/CCR7/GATA3/ICAM1	4
BP	GO:0035590	purinergic nucleotide receptor signaling pathway	4/357	21/18670	0.0006081	0.00629637	0.00504845	P2RY10/GPR171/P2RY13/P2RY12	4
BP	GO:0045620	negative regulation of lymphocyte differentiation	6/357	55/18670	0.000616853	0.00636805	0.00510592	RUNX1/RUNX3/CTLA4/JAK3/LAG3/TBX21	6
BP	GO:0010959	regulation of metal ion transport	18/357	394/18670	0.00062104	0.00639231	0.00512537	ANK2/CD19/CCR1/ICAM1/IFNG/CXCL10/KEL/CXCL9/PIK3CG/CCL3/CCL4/CCL5/CXCL11/CXCL12/KCNAB2/P2RY12/CRACR2A/FCRL3	18
BP	GO:0018108	peptidyl-tyrosine phosphorylation	17/357	363/18670	0.000663629	0.00681052	0.0054607	CD3E/CD80/ICAM1/IFNG/IL12B/ITK/JAK3/LCK/CCL5/ZAP70/TNFRSF18/SOCS3/IL24/STAP1/BANK1/STYK1/DOK7	17
BP	GO:0018212	peptidyl-tyrosine modification	17/357	366/18670	0.000727206	0.00744103	0.00596624	CD3E/CD80/ICAM1/IFNG/IL12B/ITK/JAK3/LCK/CCL5/ZAP70/TNFRSF18/SOCS3/IL24/STAP1/BANK1/STYK1/DOK7	17
BP	GO:0019883	antigen processing and presentation of endogenous antigen	4/357	22/18670	0.000732106	0.0074692	0.00598883	CD1B/CD1C/CD1E/TAP1	4
BP	GO:0048246	macrophage chemotaxis	5/357	38/18670	0.000742729	0.00753339	0.0060403	CCL3/CCL5/STAP1/SLAMF8/TRPV4	5
BP	GO:0050716	positive regulation of interleukin-1 secretion	5/357	38/18670	0.000742729	0.00753339	0.0060403	CCL3/CCL19/TLR8/NLRP2/NLRP7	5
BP	GO:0045625	regulation of T-helper 1 cell differentiation	3/357	10/18670	0.0007529	0.00754853	0.00605243	CD80/JAK3/CCL19	3
BP	GO:0072610	interleukin-12 secretion	3/357	10/18670	0.0007529	0.00754853	0.00605243	CCR7/CCL19/TLR8	3
BP	GO:0097048	dendritic cell apoptotic process	3/357	10/18670	0.0007529	0.00754853	0.00605243	CCR7/CCL19/CXCL12	3
BP	GO:2000668	regulation of dendritic cell apoptotic process	3/357	10/18670	0.0007529	0.00754853	0.00605243	CCR7/CCL19/CXCL12	3
BP	GO:0031663	lipopolysaccharide-mediated signaling pathway	6/357	58/18670	0.00082092	0.00820684	0.00658027	CD6/CD55/CCL3/CCL5/TLR2/PTPN22	6
BP	GO:0007259	JAK-STAT cascade	10/357	156/18670	0.000856235	0.00853537	0.00684369	IFNG/IL12B/JAK3/CCL5/STAT1/STAT4/TNFRSF18/SOCS3/IL24/CCR2	10
BP	GO:0002347	response to tumor cell	4/357	23/18670	0.000872974	0.00867736	0.00695754	IL12B/PRF1/CD226/CRTAM	4
BP	GO:0051896	regulation of protein kinase B signaling	13/357	244/18670	0.000881396	0.00873611	0.00700465	CD19/CD80/CHI3L1/CCR7/GATA3/LCK/PIK3CG/CCL3/CCL19/ICOS/TRAT1/BANK1/P2RY12	13
BP	GO:0019835	cytolysis	5/357	40/18670	0.000943739	0.00932747	0.00747879	GZMH/GZMA/GZMB/GZMM/PRF1	5
BP	GO:0043087	regulation of GTPase activity	20/357	479/18670	0.000969127	0.00955126	0.00765823	RHOH/CCR7/ICAM1/RASGRF1/RGS16/CCL3/CCL4/CCL5/CCL18/CCL19/CCL22/CCL24/RASGRP1/CXCL13/KLRK1/PREX1/DOCK8/CCL4L1/CCL3L3/KLRC4-KLRK1	20
BP	GO:0002836	positive regulation of response to tumor cell	3/357	11/18670	0.00102061	0.00988981	0.00792968	IL12B/CD226/CRTAM	3
BP	GO:0002839	positive regulation of immune response to tumor cell	3/357	11/18670	0.00102061	0.00988981	0.00792968	IL12B/CD226/CRTAM	3
BP	GO:0033089	positive regulation of T cell differentiation in thymus	3/357	11/18670	0.00102061	0.00988981	0.00792968	IL7R/TESPA1/RASGRP1	3
BP	GO:0033632	regulation of cell-cell adhesion mediated by integrin	3/357	11/18670	0.00102061	0.00988981	0.00792968	CD3E/CCL5/CXCL13	3
BP	GO:0045060	negative thymic T cell selection	3/357	11/18670	0.00102061	0.00988981	0.00792968	CD3E/CCR7/ZAP70	3
BP	GO:1903977	positive regulation of glial cell migration	3/357	11/18670	0.00102061	0.00988981	0.00792968	CCL3/P2RY12/CCR2	3
BP	GO:0033081	regulation of T cell differentiation in thymus	4/357	24/18670	0.00103191	0.00988981	0.00792968	CAMK4/IL7R/TESPA1/RASGRP1	4
BP	GO:0035588	G protein-coupled purinergic receptor signaling pathway	4/357	24/18670	0.00103191	0.00988981	0.00792968	P2RY10/GPR171/P2RY13/P2RY12	4
BP	GO:0042832	defense response to protozoan	4/357	24/18670	0.00103191	0.00988981	0.00792968	IRF8/IL12B/IRF4/GBP6	4
BP	GO:0046639	negative regulation of alpha-beta T cell differentiation	4/357	24/18670	0.00103191	0.00988981	0.00792968	RUNX1/RUNX3/JAK3/TBX21	4
BP	GO:0060759	regulation of response to cytokine stimulus	11/357	190/18670	0.00111101	0.0106187	0.00851414	BIRC3/RUNX1/GFI1/IFNG/CCL5/STAT1/TLR2/SOCS3/STAP1/ZBP1/NLRC5	11
BP	GO:0002718	regulation of cytokine production involved in immune response	7/357	84/18670	0.00113048	0.0107751	0.00863954	GATA3/JAK3/KIR2DL4/CD96/CD226/TBX21/CCR2	7
BP	GO:0002260	lymphocyte homeostasis	6/357	62/18670	0.00116969	0.0111184	0.00891479	TNFRSF17/JAK3/TNFRSF13B/SIT1/GPR174/TNFRSF13C	6
BP	GO:0001562	response to protozoan	4/357	25/18670	0.0012101	0.0113782	0.00912311	IRF8/IL12B/IRF4/GBP6	4
BP	GO:0002507	tolerance induction	4/357	25/18670	0.0012101	0.0113782	0.00912311	CD3E/CCR4/PDCD1/ICOS	4
BP	GO:0060330	regulation of response to interferon-gamma	4/357	25/18670	0.0012101	0.0113782	0.00912311	IFNG/STAT1/SOCS3/NLRC5	4
BP	GO:0060334	regulation of interferon-gamma-mediated signaling pathway	4/357	25/18670	0.0012101	0.0113782	0.00912311	IFNG/STAT1/SOCS3/NLRC5	4
BP	GO:0001776	leukocyte homeostasis	7/357	86/18670	0.00129828	0.0121417	0.00973525	TNFRSF17/JAK3/TNFRSF13B/SIT1/GPR174/TNFRSF13C/CCR2	7
BP	GO:0007260	tyrosine phosphorylation of STAT protein	7/357	86/18670	0.00129828	0.0121417	0.00973525	IFNG/IL12B/JAK3/CCL5/TNFRSF18/SOCS3/IL24	7
BP	GO:0002218	activation of innate immune response	15/357	319/18670	0.00130182	0.0121422	0.00973566	BIRC3/FCN1/GFI1/IFI16/IRF4/TLR2/TLR6/KLRK1/LILRA4/PTPN22/CLEC4E/TLR8/FCRL3/PYHIN1/KLRC4-KLRK1	15
BP	GO:0045429	positive regulation of nitric oxide biosynthetic process	5/357	43/18670	0.00131752	0.0121905	0.0097744	ICAM1/IFNG/TLR6/KLRK1/KLRC4-KLRK1	5
BP	GO:0050850	positive regulation of calcium-mediated signaling	5/357	43/18670	0.00131752	0.0121905	0.0097744	CD3E/CCL3/CCL4/ZAP70/TRAT1	5
BP	GO:1904646	cellular response to amyloid-beta	5/357	43/18670	0.00131752	0.0121905	0.0097744	FPR2/ICAM1/ITGA4/VCAM1/TLR6	5
BP	GO:0042368	vitamin D biosynthetic process	3/357	12/18670	0.0013416	0.0123151	0.0098743	CYP27A1/GFI1/IFNG	3
BP	GO:0043922	negative regulation by host of viral transcription	3/357	12/18670	0.0013416	0.0123151	0.0098743	CCL3/CCL4/CCL5	3
BP	GO:0070493	thrombin-activated receptor signaling pathway	3/357	12/18670	0.0013416	0.0123151	0.0098743	F2RL2/GP1BA/PLEK	3
BP	GO:0045670	regulation of osteoclast differentiation	6/357	64/18670	0.00138177	0.0126505	0.0101432	CAMK4/CCR1/IFNG/IL12B/CCL3/RASSF2	6
BP	GO:0014902	myotube differentiation	8/357	112/18670	0.00139917	0.0127301	0.0102071	CXCL10/KCNH1/KEL/CXCL9/WNT1/WNT10B/BARX2/CYP26B1	8
BP	GO:0001916	positive regulation of T cell mediated cytotoxicity	4/357	26/18670	0.00140877	0.0127301	0.0102071	CD1B/CD1C/CD1E/IL12B	4
BP	GO:0002360	T cell lineage commitment	4/357	26/18670	0.00140877	0.0127301	0.0102071	IL12B/IRF4/TBX21/SLAMF6	4
BP	GO:0010758	regulation of macrophage chemotaxis	4/357	26/18670	0.00140877	0.0127301	0.0102071	CCL5/STAP1/SLAMF8/TRPV4	4
BP	GO:0072539	T-helper 17 cell differentiation	4/357	26/18670	0.00140877	0.0127301	0.0102071	IL12B/IRF4/TBX21/SLAMF6	4
BP	GO:1904407	positive regulation of nitric oxide metabolic process	5/357	44/18670	0.00146346	0.0131901	0.0105759	ICAM1/IFNG/TLR6/KLRK1/KLRC4-KLRK1	5
BP	GO:1903725	regulation of phospholipid metabolic process	7/357	88/18670	0.00148496	0.0133258	0.0106847	CD19/CCR7/FPR2/CCL19/SOCS3/P2RY12/PIK3IP1	7
BP	GO:0002221	pattern recognition receptor signaling pathway	11/357	197/18670	0.00148618	0.0133258	0.0106847	BIRC3/FCN1/GFI1/IRF4/TLR2/TLR6/LILRA4/PTPN22/CLEC4E/TLR8/FCRL3	11
BP	GO:0046330	positive regulation of JNK cascade	9/357	140/18670	0.00150684	0.0134764	0.0108054	CD27/CD40LG/CCR7/CCL19/RASSF2/RASGRP1/TLR6/MDFIC/TRPV4	9
BP	GO:0002430	complement receptor mediated signaling pathway	3/357	13/18670	0.00171948	0.015183	0.0121737	CR2/FPR1/FPR2	3
BP	GO:0032725	positive regulation of granulocyte macrophage colony-stimulating factor production	3/357	13/18670	0.00171948	0.015183	0.0121737	CD80/IL12B/RASGRP1	3
BP	GO:0032823	regulation of natural killer cell differentiation	3/357	13/18670	0.00171948	0.015183	0.0121737	TOX/RASGRP1/ZNF683	3
BP	GO:0033623	regulation of integrin activation	3/357	13/18670	0.00171948	0.015183	0.0121737	PLEK/CXCL13/P2RY12	3
BP	GO:0045078	positive regulation of interferon-gamma biosynthetic process	3/357	13/18670	0.00171948	0.015183	0.0121737	IL12B/TLR8/TNFRSF13C	3
BP	GO:0043254	regulation of protein complex assembly	19/357	467/18670	0.00173357	0.0152686	0.0122424	ADD2/CCR7/DDB2/ICAM1/IFNG/MSN/PLEK/CCL24/WNT10B/TCL1A/HRK/TLR6/CXCL13/SPIRE1/PREX1/P2RY12/ANKRD53/GBP5/CNOT6L	19
BP	GO:0033628	regulation of cell adhesion mediated by integrin	5/357	46/18670	0.00179056	0.0157307	0.012613	CD3E/PIK3CG/CCL5/CXCL13/P2RY12	5
BP	GO:1901222	regulation of NIK/NF-kappaB signaling	8/357	117/18670	0.00184859	0.0161996	0.0129889	CD27/CHI3L1/IL12B/CCL19/TLR2/RASSF2/TLR6/PTPN22	8
BP	GO:0002691	regulation of cellular extravasation	4/357	28/18670	0.00187226	0.016203	0.0129916	ICAM1/ITGA4/CXCL12/CCR2	4
BP	GO:0035456	response to interferon-beta	4/357	28/18670	0.00187226	0.016203	0.0129916	IFI16/STAT1/IFITM1/PYHIN1	4
BP	GO:0045577	regulation of B cell differentiation	4/357	28/18670	0.00187226	0.016203	0.0129916	CD27/IKZF3/SLAMF8/FCRL3	4
BP	GO:0050858	negative regulation of antigen receptor-mediated signaling pathway	4/357	28/18670	0.00187226	0.016203	0.0129916	CD22/PTPN22/UBASH3A/FCRL3	4
BP	GO:1904994	regulation of leukocyte adhesion to vascular endothelial cell	4/357	28/18670	0.00187226	0.016203	0.0129916	ICAM1/ITGA4/CXCL12/CCR2	4
BP	GO:0050918	positive chemotaxis	6/357	68/18670	0.00189268	0.0163391	0.0131007	CCR4/FPR2/CXCL10/CCL3/CCL5/CXCL12	6
BP	GO:0002224	toll-like receptor signaling pathway	9/357	146/18670	0.00201241	0.0172869	0.0138607	BIRC3/GFI1/IRF4/TLR2/TLR6/LILRA4/PTPN22/TLR8/FCRL3	9
BP	GO:1904892	regulation of STAT cascade	9/357	146/18670	0.00201241	0.0172869	0.0138607	IFNG/IL7R/IL12B/JAK3/CCL5/TNFRSF18/SOCS3/IL24/CRLF2	9
BP	GO:2000515	negative regulation of CD4-positive, alpha-beta T cell activation	4/357	29/18670	0.00213946	0.018309	0.0146802	RUNX1/RUNX3/JAK3/TBX21	4
BP	GO:0002834	regulation of response to tumor cell	3/357	14/18670	0.0021576	0.018309	0.0146802	IL12B/CD226/CRTAM	3
BP	GO:0002837	regulation of immune response to tumor cell	3/357	14/18670	0.0021576	0.018309	0.0146802	IL12B/CD226/CRTAM	3
BP	GO:0043374	CD8-positive, alpha-beta T cell differentiation	3/357	14/18670	0.0021576	0.018309	0.0146802	RUNX1/RUNX3/TNFSF8	3
BP	GO:0043547	positive regulation of GTPase activity	17/357	405/18670	0.00215915	0.018309	0.0146802	CCR7/ICAM1/RASGRF1/RGS16/CCL3/CCL4/CCL5/CCL18/CCL19/CCL22/CCL24/RASGRP1/CXCL13/PREX1/DOCK8/CCL4L1/CCL3L3	17
BP	GO:0002711	positive regulation of T cell mediated immunity	5/357	48/18670	0.00216824	0.018309	0.0146802	CD1B/CD1C/CD1E/GATA3/IL12B	5
BP	GO:1903727	positive regulation of phospholipid metabolic process	5/357	48/18670	0.00216824	0.018309	0.0146802	CD19/CCR7/FPR2/CCL19/P2RY12	5
BP	GO:0010517	regulation of phospholipase activity	6/357	70/18670	0.00219626	0.0185007	0.0148339	ITK/CCL5/S1PR4/P2RY12/ANXA8/ANXA8L1	6
BP	GO:0001959	regulation of cytokine-mediated signaling pathway	10/357	177/18670	0.00220893	0.0185625	0.0148835	BIRC3/RUNX1/GFI1/IFNG/CCL5/STAT1/SOCS3/STAP1/ZBP1/NLRC5	10
BP	GO:0050792	regulation of viral process	11/357	208/18670	0.00228064	0.0191189	0.0153296	FCN1/NR5A2/IFI16/ISG20/CCL3/CCL4/CCL5/STAT1/IFITM1/MDFIC/APOBEC3D	11
BP	GO:0060337	type I interferon signaling pathway	7/357	95/18670	0.00230783	0.019254	0.015438	IRF8/IRF4/ISG20/STAT1/IFITM1/ZBP1/NLRC5	7
BP	GO:0071357	cellular response to type I interferon	7/357	95/18670	0.00230783	0.019254	0.015438	IRF8/IRF4/ISG20/STAT1/IFITM1/ZBP1/NLRC5	7
BP	GO:0042531	positive regulation of tyrosine phosphorylation of STAT protein	6/357	71/18670	0.00236114	0.0196048	0.0157192	IFNG/IL12B/CCL5/TNFRSF18/SOCS3/IL24	6
BP	GO:1904427	positive regulation of calcium ion transmembrane transport	6/357	71/18670	0.00236114	0.0196048	0.0157192	ANK2/CD19/CXCL10/CXCL9/CXCL11/CRACR2A	6
BP	GO:0002534	cytokine production involved in inflammatory response	5/357	49/18670	0.00237741	0.0196461	0.0157523	CD6/CD96/TLR6/GBP5/NLRP7	5
BP	GO:0032757	positive regulation of interleukin-8 production	5/357	49/18670	0.00237741	0.0196461	0.0157523	CD2/FCN1/TLR2/TLR8/CD244	5
BP	GO:0043372	positive regulation of CD4-positive, alpha-beta T cell differentiation	4/357	30/18670	0.00243184	0.0200482	0.0160747	CD80/IFNG/IL12B/CCL19	4
BP	GO:0007163	establishment or maintenance of cell polarity	11/357	210/18670	0.00245659	0.0201568	0.0161618	RHOH/CD3G/CCR7/GATA3/MSN/CCL4/CCL19/UST/KIF26B/CYP26B1/DOCK8	11
BP	GO:0009612	response to mechanical stimulus	11/357	210/18670	0.00245659	0.0201568	0.0161618	TNFRSF8/CHI3L1/CXCL10/CXCL12/STAT1/BTG2/ANKRD1/TLR8/ATP8A2/TRPV4/TIFAB	11
BP	GO:0034765	regulation of ion transmembrane transport	19/357	483/18670	0.00252727	0.0206879	0.0165876	ANK2/CD19/IFNG/CXCL10/KCNA3/KCNH1/KCNJ10/KEL/CXCL9/PIK3CG/RASGRF1/SCN3A/CXCL11/KCNAB2/CACNA1I/KCNQ5/CRACR2A/ANO9/CCR2	19
BP	GO:0070741	response to interleukin-6	5/357	50/18670	0.00260086	0.0212404	0.0170306	CHI3L1/GFI1/ICAM1/STAT1/SOCS3	5
BP	GO:0032645	regulation of granulocyte macrophage colony-stimulating factor production	3/357	15/18670	0.00265903	0.0215134	0.0172495	CD80/IL12B/RASGRP1	3
BP	GO:0042362	fat-soluble vitamin biosynthetic process	3/357	15/18670	0.00265903	0.0215134	0.0172495	CYP27A1/GFI1/IFNG	3
BP	GO:0051770	positive regulation of nitric-oxide synthase biosynthetic process	3/357	15/18670	0.00265903	0.0215134	0.0172495	IFNG/STAT1/TLR2	3
BP	GO:2000402	negative regulation of lymphocyte migration	3/357	15/18670	0.00265903	0.0215134	0.0172495	KLRK1/GCSAM/KLRC4-KLRK1	3
BP	GO:0050848	regulation of calcium-mediated signaling	7/357	98/18670	0.00275257	0.0222185	0.0178149	CD3E/CD22/PLEK/CCL3/CCL4/ZAP70/TRAT1	7
BP	GO:0030168	platelet activation	9/357	153/18670	0.00276427	0.0222613	0.0178492	CD40LG/F2RL2/GP1BA/LCK/PIK3CG/PLEK/PRKCB/PRKCQ/P2RY12	9
BP	GO:0045599	negative regulation of fat cell differentiation	5/357	51/18670	0.00283916	0.0227774	0.018263	GATA3/WNT1/WNT10B/TRPV4/BBS12	5
BP	GO:0007254	JNK cascade	11/357	214/18670	0.00284145	0.0227774	0.018263	CD27/CD40LG/CCR7/DUSP9/CCL19/RASSF2/RASGRP1/TLR6/PTPN22/MDFIC/TRPV4	11
BP	GO:0050710	negative regulation of cytokine secretion	6/357	74/18670	0.00291191	0.0232562	0.0186469	TLR6/PTPN22/TLR8/BANK1/NLRP7/CARD17	6
BP	GO:0034340	response to type I interferon	7/357	99/18670	0.00291454	0.0232562	0.0186469	IRF8/IRF4/ISG20/STAT1/IFITM1/ZBP1/NLRC5	7
BP	GO:0032479	regulation of type I interferon production	8/357	126/18670	0.00293801	0.0233898	0.018754	IFI16/STAT1/TLR2/LILRA4/PTPN22/TLR8/ZBP1/NLRC5	8
BP	GO:1903707	negative regulation of hemopoiesis	9/357	155/18670	0.00301551	0.0239519	0.0192047	RUNX1/RUNX3/CTLA4/JAK3/LAG3/CCL3/GPR171/TBX21/MIXL1	9
BP	GO:0046328	regulation of JNK cascade	10/357	185/18670	0.00304246	0.024111	0.0193323	CD27/CD40LG/CCR7/CCL19/RASSF2/RASGRP1/TLR6/PTPN22/MDFIC/TRPV4	10
BP	GO:0031529	ruffle organization	5/357	52/18670	0.00309285	0.0244298	0.0195879	CCR7/ICAM1/PLEK/STAP1/P2RY12	5
BP	GO:0035587	purinergic receptor signaling pathway	4/357	32/18670	0.00309673	0.0244298	0.0195879	P2RY10/GPR171/P2RY13/P2RY12	4
BP	GO:0002475	antigen processing and presentation via MHC class Ib	3/357	16/18670	0.00322663	0.0252257	0.0202261	CD1B/CD1C/CD1E	3
BP	GO:0010820	positive regulation of T cell chemotaxis	3/357	16/18670	0.00322663	0.0252257	0.0202261	CCL5/CXCL13/CCR2	3
BP	GO:0032604	granulocyte macrophage colony-stimulating factor production	3/357	16/18670	0.00322663	0.0252257	0.0202261	CD80/IL12B/RASGRP1	3
BP	GO:0032695	negative regulation of interleukin-12 production	3/357	16/18670	0.00322663	0.0252257	0.0202261	JAK3/TLR8/TIGIT	3
BP	GO:0032606	type I interferon production	8/357	128/18670	0.00323693	0.0252495	0.0202451	IFI16/STAT1/TLR2/LILRA4/PTPN22/TLR8/ZBP1/NLRC5	8
BP	GO:0072088	nephron epithelium morphogenesis	6/357	76/18670	0.00332902	0.0259097	0.0207745	FOXD1/GATA3/PBX1/STAT1/WNT1/KIF26B	6
BP	GO:0045637	regulation of myeloid cell differentiation	12/357	251/18670	0.00337237	0.0261886	0.0209981	CAMK4/RUNX1/CCR1/GP1BA/IFNG/IL12B/PRKCB/PRKCQ/CCL3/STAT1/RASSF2/GPR171	12
BP	GO:0032481	positive regulation of type I interferon production	6/357	77/18670	0.00355351	0.0274726	0.0220276	IFI16/STAT1/TLR2/PTPN22/TLR8/ZBP1	6
BP	GO:1901224	positive regulation of NIK/NF-kappaB signaling	6/357	77/18670	0.00355351	0.0274726	0.0220276	CD27/CHI3L1/IL12B/CCL19/TLR2/TLR6	6
BP	GO:1902106	negative regulation of leukocyte differentiation	7/357	103/18670	0.00363649	0.0280518	0.022492	RUNX1/RUNX3/CTLA4/JAK3/LAG3/CCL3/TBX21	7
BP	GO:1904645	response to amyloid-beta	5/357	54/18670	0.00364861	0.028083	0.022517	FPR2/ICAM1/ITGA4/VCAM1/TLR6	5
BP	GO:0043903	regulation of symbiosis, encompassing mutualism through parasitism	11/357	222/18670	0.00375684	0.0288522	0.0231338	FCN1/NR5A2/IFI16/ISG20/CCL3/CCL4/CCL5/STAT1/IFITM1/MDFIC/APOBEC3D	11
BP	GO:0072028	nephron morphogenesis	6/357	78/18670	0.00378907	0.0290356	0.0232808	FOXD1/GATA3/PBX1/STAT1/WNT1/KIF26B	6
BP	GO:0002693	positive regulation of cellular extravasation	3/357	17/18670	0.00386301	0.0292798	0.0234766	ICAM1/ITGA4/CCR2	3
BP	GO:0032740	positive regulation of interleukin-17 production	3/357	17/18670	0.00386301	0.0292798	0.0234766	IL12B/PRKCQ/SLAMF6	3
BP	GO:0045072	regulation of interferon-gamma biosynthetic process	3/357	17/18670	0.00386301	0.0292798	0.0234766	IL12B/TLR8/TNFRSF13C	3
BP	GO:0048535	lymph node development	3/357	17/18670	0.00386301	0.0292798	0.0234766	IL7R/LTB/TOX	3
BP	GO:1904996	positive regulation of leukocyte adhesion to vascular endothelial cell	3/357	17/18670	0.00386301	0.0292798	0.0234766	ICAM1/ITGA4/CCR2	3
BP	GO:0032660	regulation of interleukin-17 production	4/357	34/18670	0.00387591	0.0293137	0.0235038	IFNG/IL12B/PRKCQ/SLAMF6	4
BP	GO:0050730	regulation of peptidyl-tyrosine phosphorylation	12/357	256/18670	0.00394887	0.0298007	0.0238943	CD3E/CD80/ICAM1/IFNG/IL12B/CCL5/TNFRSF18/SOCS3/IL24/STAP1/BANK1/DOK7	12
BP	GO:0070509	calcium ion import	6/357	80/18670	0.00429465	0.0322774	0.0258801	MS4A1/CCL3/CXCL12/CACNA1I/TRPV4/FCRL3	6
BP	GO:0019882	antigen processing and presentation	11/357	226/18670	0.00429561	0.0322774	0.0258801	CD1B/CD1C/CD1E/CD8A/CCR7/HLA-DOB/HLA-DRB5/ICAM1/LAG3/CCL19/TAP1	11
BP	GO:0030010	establishment of cell polarity	8/357	135/18670	0.00447289	0.033537	0.0268901	CCR7/GATA3/MSN/CCL19/UST/KIF26B/CYP26B1/DOCK8	8
BP	GO:0034109	homotypic cell-cell adhesion	6/357	81/18670	0.00456532	0.0340491	0.0273007	GP1BA/PIK3CG/PLEK/PRKCQ/CCL5/P2RY12	6
BP	GO:0032693	negative regulation of interleukin-10 production	3/357	18/18670	0.00457055	0.0340491	0.0273007	IL12B/JAK3/PDCD1LG2	3
BP	GO:0042095	interferon-gamma biosynthetic process	3/357	18/18670	0.00457055	0.0340491	0.0273007	IL12B/TLR8/TNFRSF13C	3
BP	GO:1903428	positive regulation of reactive oxygen species biosynthetic process	5/357	57/18670	0.00461146	0.0342805	0.0274862	ICAM1/IFNG/TLR6/KLRK1/KLRC4-KLRK1	5
BP	GO:0042742	defense response to bacterium	14/357	330/18670	0.00469883	0.0348555	0.0279473	TNFSF8/FPR2/IRF8/IL12B/TLR2/TLR6/CXCL13/KLRK1/CLEC4E/PLAC8/SLAMF8/GBP6/IGLL5/KLRC4-KLRK1	14
BP	GO:0046627	negative regulation of insulin receptor signaling pathway	4/357	36/18670	0.00477802	0.0353675	0.0283578	PRKCB/PRKCQ/PTPRE/SOCS3	4
BP	GO:0046209	nitric oxide metabolic process	6/357	82/18670	0.00484836	0.035812	0.0287142	ICAM1/IFNG/TLR2/TLR6/KLRK1/KLRC4-KLRK1	6
BP	GO:0002758	innate immune response-activating signal transduction	13/357	298/18670	0.00504102	0.0371562	0.0297919	BIRC3/FCN1/GFI1/IRF4/TLR2/TLR6/KLRK1/LILRA4/PTPN22/CLEC4E/TLR8/FCRL3/KLRC4-KLRK1	13
BP	GO:0042509	regulation of tyrosine phosphorylation of STAT protein	6/357	83/18670	0.00514409	0.0378357	0.0303368	IFNG/IL12B/CCL5/TNFRSF18/SOCS3/IL24	6
BP	GO:0043900	regulation of multi-organism process	16/357	405/18670	0.00516042	0.0378757	0.0303689	BIRC3/CD55/FCN1/NR5A2/IFI16/IFNG/IL12B/ISG20/PRF1/CCL3/CCL4/CCL5/STAT1/IFITM1/MDFIC/APOBEC3D	16
BP	GO:0045071	negative regulation of viral genome replication	5/357	59/18670	0.00534589	0.0387866	0.0310993	IFI16/ISG20/CCL5/IFITM1/APOBEC3D	5
BP	GO:0045824	negative regulation of innate immune response	5/357	59/18670	0.00534589	0.0387866	0.0310993	IFI16/KIR2DL4/CD96/SLAMF8/NLRC5	5
BP	GO:0070527	platelet aggregation	5/357	59/18670	0.00534589	0.0387866	0.0310993	GP1BA/PIK3CG/PLEK/PRKCQ/P2RY12	5
BP	GO:0002544	chronic inflammatory response	3/357	19/18670	0.00535142	0.0387866	0.0310993	CCL5/VCAM1/CXCL13	3
BP	GO:0032026	response to magnesium ion	3/357	19/18670	0.00535142	0.0387866	0.0310993	CCND1/SMPD3/SLFN14	3
BP	GO:0045063	T-helper 1 cell differentiation	3/357	19/18670	0.00535142	0.0387866	0.0310993	CD80/JAK3/CCL19	3
BP	GO:0097305	response to alcohol	11/357	233/18670	0.00538505	0.0389493	0.0312297	CCND1/CD27/CCR5/CCR7/GATA3/ICAM1/PTGER2/CCL3/CCL19/VCAM1/MLC1	11
BP	GO:0007596	blood coagulation	14/357	336/18670	0.00548988	0.0396251	0.0317715	CD40LG/F2RL2/F13A1/GATA3/GP1BA/HBD/LCK/PIK3CG/PLEK/PRKCB/PRKCQ/P2RY12/DOCK8/ANXA8	14
BP	GO:0043901	negative regulation of multi-organism process	9/357	171/18670	0.00573508	0.0412602	0.0330825	FCN1/IFI16/ISG20/CCL3/CCL4/CCL5/STAT1/IFITM1/APOBEC3D	9
BP	GO:0045576	mast cell activation	5/357	60/18670	0.00574247	0.0412602	0.0330825	RHOH/PIK3CG/RASGRP1/CD226/CRLF2	5
BP	GO:1903901	negative regulation of viral life cycle	6/357	85/18670	0.00577491	0.0412602	0.0330825	FCN1/IFI16/ISG20/CCL5/IFITM1/APOBEC3D	6
BP	GO:2001057	reactive nitrogen species metabolic process	6/357	85/18670	0.00577491	0.0412602	0.0330825	ICAM1/IFNG/TLR2/TLR6/KLRK1/KLRC4-KLRK1	6
BP	GO:0002707	negative regulation of lymphocyte mediated immunity	4/357	38/18670	0.00581129	0.0412602	0.0330825	IL7R/KIR2DL4/CD96/TBX21	4
BP	GO:0032620	interleukin-17 production	4/357	38/18670	0.00581129	0.0412602	0.0330825	IFNG/IL12B/PRKCQ/SLAMF6	4
BP	GO:0046636	negative regulation of alpha-beta T cell activation	4/357	38/18670	0.00581129	0.0412602	0.0330825	RUNX1/RUNX3/JAK3/TBX21	4
BP	GO:1900077	negative regulation of cellular response to insulin stimulus	4/357	38/18670	0.00581129	0.0412602	0.0330825	PRKCB/PRKCQ/PTPRE/SOCS3	4
BP	GO:0007249	I-kappaB kinase/NF-kappaB signaling	12/357	269/18670	0.00582465	0.0412708	0.0330911	BIRC3/RHOH/CCR7/PRKCB/CCL19/STAT1/TLR2/TLR6/TRIM22/TLR8/APOL3/TIFAB	12
BP	GO:0032874	positive regulation of stress-activated MAPK cascade	9/357	172/18670	0.00595295	0.0420942	0.0337512	CD27/CD40LG/CCR7/CCL19/RASSF2/RASGRP1/TLR6/MDFIC/TRPV4	9
BP	GO:0070304	positive regulation of stress-activated protein kinase signaling cascade	9/357	173/18670	0.00617716	0.0430204	0.0344939	CD27/CD40LG/CCR7/CCL19/RASSF2/RASGRP1/TLR6/MDFIC/TRPV4	9
BP	GO:0002577	regulation of antigen processing and presentation	3/357	20/18670	0.00620759	0.0430204	0.0344939	CCR7/HLA-DOB/CCL19	3
BP	GO:0032816	positive regulation of natural killer cell activation	3/357	20/18670	0.00620759	0.0430204	0.0344939	IL12B/TOX/RASGRP1	3
BP	GO:0035458	cellular response to interferon-beta	3/357	20/18670	0.00620759	0.0430204	0.0344939	IFI16/STAT1/PYHIN1	3
BP	GO:0042535	positive regulation of tumor necrosis factor biosynthetic process	3/357	20/18670	0.00620759	0.0430204	0.0344939	TNFRSF8/IFNG/CCR2	3
BP	GO:0043586	tongue development	3/357	20/18670	0.00620759	0.0430204	0.0344939	WNT10B/CYP26B1/WNT10A	3
BP	GO:0051767	nitric-oxide synthase biosynthetic process	3/357	20/18670	0.00620759	0.0430204	0.0344939	IFNG/STAT1/TLR2	3
BP	GO:0051769	regulation of nitric-oxide synthase biosynthetic process	3/357	20/18670	0.00620759	0.0430204	0.0344939	IFNG/STAT1/TLR2	3
BP	GO:1900017	positive regulation of cytokine production involved in inflammatory response	3/357	20/18670	0.00620759	0.0430204	0.0344939	CD6/TLR6/GBP5	3
BP	GO:1903978	regulation of microglial cell activation	3/357	20/18670	0.00620759	0.0430204	0.0344939	CCL3/CST7/STAP1	3
BP	GO:0007599	hemostasis	14/357	341/18670	0.00622806	0.0430764	0.0345388	CD40LG/F2RL2/F13A1/GATA3/GP1BA/HBD/LCK/PIK3CG/PLEK/PRKCB/PRKCQ/P2RY12/DOCK8/ANXA8	14
BP	GO:0050817	coagulation	14/357	342/18670	0.00638483	0.0440731	0.0353379	CD40LG/F2RL2/F13A1/GATA3/GP1BA/HBD/LCK/PIK3CG/PLEK/PRKCB/PRKCQ/P2RY12/DOCK8/ANXA8	14
BP	GO:0031348	negative regulation of defense response	11/357	239/18670	0.00648308	0.0446627	0.0358107	FPR2/GATA3/IFI16/IL12B/KIR2DL4/CST7/SOCS3/CD96/SLAMF8/NLRC5/NLRP7	11
BP	GO:1904064	positive regulation of cation transmembrane transport	8/357	144/18670	0.0065607	0.045108	0.0361678	ANK2/CD19/IFNG/CXCL10/CXCL9/CXCL11/CRACR2A/CCR2	8
BP	GO:0051281	positive regulation of release of sequestered calcium ion into cytosol	4/357	40/18670	0.00698356	0.0479207	0.038423	CD19/CXCL10/CXCL9/CXCL11	4
BP	GO:0002637	regulation of immunoglobulin production	5/357	63/18670	0.00705606	0.0483229	0.0387454	CD22/CD40LG/TBX21/MZB1/FCRL3	5
BP	GO:0008154	actin polymerization or depolymerization	10/357	209/18670	0.00711807	0.0484269	0.0388288	ADD2/CCR7/ICAM1/PLEK/CCL24/CXCL12/PSTPIP2/PSTPIP1/SPIRE1/PREX1	10
BP	GO:0001779	natural killer cell differentiation	3/357	21/18670	0.00714084	0.0484269	0.0388288	TOX/RASGRP1/ZNF683	3
BP	GO:0032674	regulation of interleukin-5 production	3/357	21/18670	0.00714084	0.0484269	0.0388288	GATA3/IL5RA/CRLF2	3
BP	GO:0035455	response to interferon-alpha	3/357	21/18670	0.00714084	0.0484269	0.0388288	GATA3/IFITM1/PYHIN1	3
BP	GO:2000316	regulation of T-helper 17 type immune response	3/357	21/18670	0.00714084	0.0484269	0.0388288	IL12B/PRKCQ/TBX21	3
BP	GO:0046427	positive regulation of JAK-STAT cascade	6/357	89/18670	0.00720315	0.0487544	0.0390914	IFNG/IL12B/CCL5/TNFRSF18/SOCS3/IL24	6
BP	GO:0002761	regulation of myeloid leukocyte differentiation	7/357	117/18670	0.00726605	0.0490846	0.0393562	CAMK4/RUNX1/CCR1/IFNG/IL12B/CCL3/RASSF2	7
BP	GO:1901653	cellular response to peptide	15/357	385/18670	0.0075232	0.0506196	0.040587	FPR2/ICAM1/ITGA4/JAK3/PRKCB/PRKCQ/PTPRE/STAT1/VCAM1/WNT1/SOCS3/TLR6/PTPN22/MZB1/SMPD3	15
BP	GO:0046579	positive regulation of Ras protein signal transduction	5/357	64/18670	0.00753693	0.0506196	0.040587	F2RL2/RASGRF1/RASGRP1/P2RY10/GPR174	5
BP	GO:0050922	negative regulation of chemotaxis	5/357	64/18670	0.00753693	0.0506196	0.040587	CXCL13/KLRK1/STAP1/SLAMF8/KLRC4-KLRK1	5
BP	GO:0007520	myoblast fusion	4/357	41/18670	0.00762415	0.0509106	0.0408203	CXCL10/KCNH1/CXCL9/WNT1	4
BP	GO:0010955	negative regulation of protein processing	4/357	41/18670	0.00762415	0.0509106	0.0408203	BIRC3/CD55/CST7/NLRP7	4
BP	GO:1903318	negative regulation of protein maturation	4/357	41/18670	0.00762415	0.0509106	0.0408203	BIRC3/CD55/CST7/NLRP7	4
BP	GO:0042119	neutrophil activation	18/357	498/18670	0.00766393	0.0510782	0.0409546	ALOX5/CEACAM3/CHI3L1/CHRNB4/CD55/FCN1/FPR1/FPR2/CCL5/TLR2/KCNAB2/IL18RAP/SIRPB1/PLAC8/PREX1/MMP25/CRACR2A/CLEC12A	18
BP	GO:0051092	positive regulation of NF-kappaB transcription factor activity	8/357	149/18670	0.00800109	0.0532233	0.0426746	CD40LG/ICAM1/PRKCB/PRKCQ/TLR2/IL18RAP/TLR6/TRIM22	8
BP	GO:0060675	ureteric bud morphogenesis	5/357	65/18670	0.00804015	0.0533811	0.0428011	FOXD1/GATA3/PBX1/WNT1/KIF26B	5
BP	GO:0032634	interleukin-5 production	3/357	22/18670	0.00815275	0.0537186	0.0430717	GATA3/IL5RA/CRLF2	3
BP	GO:0042359	vitamin D metabolic process	3/357	22/18670	0.00815275	0.0537186	0.0430717	CYP27A1/GFI1/IFNG	3
BP	GO:0045624	positive regulation of T-helper cell differentiation	3/357	22/18670	0.00815275	0.0537186	0.0430717	CD80/IL12B/CCL19	3
BP	GO:0048305	immunoglobulin secretion	3/357	22/18670	0.00815275	0.0537186	0.0430717	CD22/CD40LG/LAX1	3
BP	GO:0010559	regulation of glycoprotein biosynthetic process	4/357	42/18670	0.0083022	0.0544969	0.0436958	CCR7/JAK3/CCL19/ITM2A	4
BP	GO:0097028	dendritic cell differentiation	4/357	42/18670	0.0083022	0.0544969	0.0436958	CAMK4/CCR7/IRF4/CCL19	4
BP	GO:0045428	regulation of nitric oxide biosynthetic process	5/357	66/18670	0.00856623	0.0559136	0.0448317	ICAM1/IFNG/TLR6/KLRK1/KLRC4-KLRK1	5
BP	GO:0046626	regulation of insulin receptor signaling pathway	5/357	66/18670	0.00856623	0.0559136	0.0448317	PRKCB/PRKCQ/PTPRE/SOCS3/MZB1	5
BP	GO:0072171	mesonephric tubule morphogenesis	5/357	66/18670	0.00856623	0.0559136	0.0448317	FOXD1/GATA3/PBX1/WNT1/KIF26B	5
BP	GO:0046718	viral entry into host cell	7/357	121/18670	0.00867548	0.0565206	0.0453184	CD80/CCR5/CR2/CD55/FCN1/ICAM1/IFITM1	7
BP	GO:0038061	NIK/NF-kappaB signaling	9/357	183/18670	0.00879365	0.0571834	0.0458498	BIRC3/CD27/CHI3L1/IL12B/CCL19/TLR2/RASSF2/TLR6/PTPN22	9
BP	GO:0072080	nephron tubule development	6/357	93/18670	0.00887074	0.0575771	0.0461655	FOXD1/GATA3/PBX1/STAT1/WNT1/KIF26B	6
BP	GO:0006775	fat-soluble vitamin metabolic process	4/357	43/18670	0.00901858	0.0584276	0.0468475	CYP27A1/GFI1/IFNG/CYP26B1	4
BP	GO:0019079	viral genome replication	7/357	122/18670	0.00905717	0.0585686	0.0469605	NR5A2/IFI16/ISG20/CCL5/IFITM1/CXCR6/APOBEC3D	7
BP	GO:0071804	cellular potassium ion transport	10/357	217/18670	0.00915205	0.0589629	0.0472767	ANK2/KCNA3/KCNH1/KCNJ10/KCNN4/KEL/SLC12A3/KCNAB2/KCNQ5/P2RY12	10
BP	GO:0071805	potassium ion transmembrane transport	10/357	217/18670	0.00915205	0.0589629	0.0472767	ANK2/KCNA3/KCNH1/KCNJ10/KCNN4/KEL/SLC12A3/KCNAB2/KCNQ5/P2RY12	10
BP	GO:0009595	detection of biotic stimulus	3/357	23/18670	0.00924472	0.0590135	0.0473172	TLR2/TLR6/CRTAM	3
BP	GO:0032703	negative regulation of interleukin-2 production	3/357	23/18670	0.00924472	0.0590135	0.0473172	GATA3/LAG3/TBX21	3
BP	GO:0034695	response to prostaglandin E	3/357	23/18670	0.00924472	0.0590135	0.0473172	CCR7/PTGER2/CCL19	3
BP	GO:0036037	CD8-positive, alpha-beta T cell activation	3/357	23/18670	0.00924472	0.0590135	0.0473172	RUNX1/RUNX3/TNFSF8	3
BP	GO:0071425	hematopoietic stem cell proliferation	3/357	23/18670	0.00924472	0.0590135	0.0473172	RUNX1/WNT1/WNT10B	3
BP	GO:0060993	kidney morphogenesis	6/357	94/18670	0.00932743	0.0594325	0.0476532	FOXD1/GATA3/PBX1/STAT1/WNT1/KIF26B	6
BP	GO:0071622	regulation of granulocyte chemotaxis	4/357	44/18670	0.00977409	0.0619937	0.0497067	CCR7/CCL5/CCL19/TRPV4	4
BP	GO:0002702	positive regulation of production of molecular mediator of immune response	6/357	95/18670	0.00980067	0.0619937	0.0497067	GATA3/KIR2DL4/CD226/TBX21/MZB1/CD244	6
BP	GO:0045069	regulation of viral genome replication	6/357	95/18670	0.00980067	0.0619937	0.0497067	NR5A2/IFI16/ISG20/CCL5/IFITM1/APOBEC3D	6
BP	GO:0061326	renal tubule development	6/357	95/18670	0.00980067	0.0619937	0.0497067	FOXD1/GATA3/PBX1/STAT1/WNT1/KIF26B	6
BP	GO:0002526	acute inflammatory response	10/357	220/18670	0.0100199	0.0632653	0.0507264	CD6/CD19/CCR7/CR2/CD55/GATA3/CFH/ICAM1/PIK3CG/VCAM1	10
BP	GO:0019724	B cell mediated immunity	10/357	221/18670	0.0103227	0.0650591	0.0521646	CD19/CD27/CD40LG/CD70/CR2/CD55/CD226/TBX21/TLR8/IGLL5	10
BP	GO:0034767	positive regulation of ion transmembrane transport	8/357	156/18670	0.0104009	0.0651873	0.0522674	ANK2/CD19/IFNG/CXCL10/CXCL9/CXCL11/CRACR2A/CCR2	8
BP	GO:0009110	vitamin biosynthetic process	3/357	24/18670	0.010418	0.0651873	0.0522674	CYP27A1/GFI1/IFNG	3
BP	GO:0032897	negative regulation of viral transcription	3/357	24/18670	0.010418	0.0651873	0.0522674	CCL3/CCL4/CCL5	3
BP	GO:0034162	toll-like receptor 9 signaling pathway	3/357	24/18670	0.010418	0.0651873	0.0522674	LILRA4/TLR8/FCRL3	3
BP	GO:0007187	G protein-coupled receptor signaling pathway, coupled to cyclic nucleotide second messenger	11/357	256/18670	0.0105636	0.0659797	0.0529027	CCR1/FPR1/FPR2/XCR1/CXCL10/INSL3/CXCL9/PTGER2/CXCL11/S1PR4/P2RY12	11
BP	GO:0030316	osteoclast differentiation	6/357	97/18670	0.010798	0.067323	0.0539798	CAMK4/CCR1/IFNG/IL12B/CCL3/RASSF2	6
BP	GO:0019058	viral life cycle	13/357	328/18670	0.0108433	0.0674846	0.0541094	CD80/CCR5/CR2/CD55/FCN1/NR5A2/ICAM1/IFI16/ISG20/CCL5/IFITM1/CXCR6/APOBEC3D	13
BP	GO:0050766	positive regulation of phagocytosis	5/357	70/18670	0.0109088	0.0677708	0.0543389	FPR2/IFNG/SIRPB1/STAP1/SIRPG	5
BP	GO:0050764	regulation of phagocytosis	6/357	98/18670	0.0113227	0.0700919	0.0561999	FPR2/IFNG/TLR2/SIRPB1/STAP1/SIRPG	6
BP	GO:0060191	regulation of lipase activity	6/357	98/18670	0.0113227	0.0700919	0.0561999	ITK/CCL5/S1PR4/P2RY12/ANXA8/ANXA8L1	6
BP	GO:0071354	cellular response to interleukin-6	4/357	46/18670	0.0114056	0.0703548	0.0564107	GFI1/ICAM1/STAT1/SOCS3	4
BP	GO:1900015	regulation of cytokine production involved in inflammatory response	4/357	46/18670	0.0114056	0.0703548	0.0564107	CD6/TLR6/GBP5/NLRP7	4
BP	GO:0051057	positive regulation of small GTPase mediated signal transduction	5/357	71/18670	0.0115563	0.0711584	0.057055	F2RL2/RASGRF1/RASGRP1/P2RY10/GPR174	5
BP	GO:0002335	mature B cell differentiation	3/357	25/18670	0.0116736	0.0713751	0.0572288	CD19/ITM2A/SLAMF8	3
BP	GO:0002719	negative regulation of cytokine production involved in immune response	3/357	25/18670	0.0116736	0.0713751	0.0572288	JAK3/CD96/TBX21	3
BP	GO:0045332	phospholipid translocation	3/357	25/18670	0.0116736	0.0713751	0.0572288	KCNN4/ATP8A2/ATP8B3	3
BP	GO:0045672	positive regulation of osteoclast differentiation	3/357	25/18670	0.0116736	0.0713751	0.0572288	CCR1/IFNG/IL12B	3
BP	GO:0051224	negative regulation of protein transport	9/357	193/18670	0.0121758	0.0743149	0.0595859	CD22/TLR6/PTPN22/MDFIC/TLR8/BANK1/DERL3/NLRP7/CARD17	9
BP	GO:0032535	regulation of cellular component size	14/357	370/18670	0.0122174	0.0744383	0.0596849	ADD2/CCR7/ICAM1/IL7R/KCNN4/KEL/MSN/PLEK/CCL24/CXCL12/SLC12A3/SPIRE1/PREX1/TRPV4	14
BP	GO:0035722	interleukin-12-mediated signaling pathway	4/357	47/18670	0.0122831	0.0747078	0.0599009	IFNG/IL12B/MSN/STAT4	4
BP	GO:0007200	phospholipase C-activating G protein-coupled receptor signaling pathway	6/357	100/18670	0.0124257	0.0754431	0.0604905	F2RL2/FPR1/FPR2/P2RY10/P2RY12/GPR174	6
BP	GO:0032945	negative regulation of mononuclear cell proliferation	5/357	73/18670	0.0129289	0.0782254	0.0627214	CD80/CTLA4/TNFRSF13B/PLA2G2D/PDCD1LG2	5
BP	GO:0050672	negative regulation of lymphocyte proliferation	5/357	73/18670	0.0129289	0.0782254	0.0627214	CD80/CTLA4/TNFRSF13B/PLA2G2D/PDCD1LG2	5
BP	GO:0010996	response to auditory stimulus	3/357	26/18670	0.0130125	0.0784583	0.0629081	CXCL10/ATP8A2/TIFAB	3
BP	GO:0034204	lipid translocation	3/357	26/18670	0.0130125	0.0784583	0.0629081	KCNN4/ATP8A2/ATP8B3	3
BP	GO:0007140	male meiotic nuclear division	4/357	48/18670	0.0132026	0.0793297	0.0636068	SYCP2/CYP26B1/DPEP3/MEI1	4
BP	GO:0072604	interleukin-6 secretion	4/357	48/18670	0.0132026	0.0793297	0.0636068	PTPN22/TLR8/BANK1/TRPV4	4
BP	GO:0042552	myelination	7/357	132/18670	0.0135786	0.0814484	0.0653056	ANK2/EGR2/KCNJ10/KEL/MAL/TLR2/CST7	7
BP	GO:2000379	positive regulation of reactive oxygen species metabolic process	6/357	102/18670	0.013602	0.0814484	0.0653056	FPR2/ICAM1/IFNG/TLR6/KLRK1/KLRC4-KLRK1	6
BP	GO:0072078	nephron tubule morphogenesis	5/357	74/18670	0.0136548	0.0814835	0.0653338	FOXD1/GATA3/PBX1/WNT1/KIF26B	5
BP	GO:1900076	regulation of cellular response to insulin stimulus	5/357	74/18670	0.0136548	0.0814835	0.0653338	PRKCB/PRKCQ/PTPRE/SOCS3/MZB1	5
BP	GO:1904950	negative regulation of establishment of protein localization	9/357	197/18670	0.0137703	0.0820322	0.0657737	CD22/TLR6/PTPN22/MDFIC/TLR8/BANK1/DERL3/NLRP7/CARD17	9
BP	GO:0008347	glial cell migration	4/357	49/18670	0.0141649	0.0839515	0.0673126	CCL3/STAP1/P2RY12/CCR2	4
BP	GO:0071349	cellular response to interleukin-12	4/357	49/18670	0.0141649	0.0839515	0.0673126	IFNG/IL12B/MSN/STAT4	4
BP	GO:1903018	regulation of glycoprotein metabolic process	4/357	49/18670	0.0141649	0.0839515	0.0673126	CCR7/JAK3/CCL19/ITM2A	4
BP	GO:0000188	inactivation of MAPK activity	3/357	27/18670	0.0144354	0.0846893	0.0679042	DUSP2/DUSP9/LAX1	3
BP	GO:0006884	cell volume homeostasis	3/357	27/18670	0.0144354	0.0846893	0.0679042	KCNN4/SLC12A3/TRPV4	3
BP	GO:0010971	positive regulation of G2/M transition of mitotic cell cycle	3/357	27/18670	0.0144354	0.0846893	0.0679042	CCND1/PBX1/WNT10B	3
BP	GO:0043032	positive regulation of macrophage activation	3/357	27/18670	0.0144354	0.0846893	0.0679042	CCL3/TLR6/STAP1	3
BP	GO:0043921	modulation by host of viral transcription	3/357	27/18670	0.0144354	0.0846893	0.0679042	CCL3/CCL4/CCL5	3
BP	GO:0052472	modulation by host of symbiont transcription	3/357	27/18670	0.0144354	0.0846893	0.0679042	CCL3/CCL4/CCL5	3
BP	GO:0007272	ensheathment of neurons	7/357	134/18670	0.0146477	0.0848269	0.0680145	ANK2/EGR2/KCNJ10/KEL/MAL/TLR2/CST7	7
BP	GO:0008366	axon ensheathment	7/357	134/18670	0.0146477	0.0848269	0.0680145	ANK2/EGR2/KCNJ10/KEL/MAL/TLR2/CST7	7
BP	GO:0030260	entry into host cell	7/357	134/18670	0.0146477	0.0848269	0.0680145	CD80/CCR5/CR2/CD55/FCN1/ICAM1/IFITM1	7
BP	GO:0044409	entry into host	7/357	134/18670	0.0146477	0.0848269	0.0680145	CD80/CCR5/CR2/CD55/FCN1/ICAM1/IFITM1	7
BP	GO:0051806	entry into cell of other organism involved in symbiotic interaction	7/357	134/18670	0.0146477	0.0848269	0.0680145	CD80/CCR5/CR2/CD55/FCN1/ICAM1/IFITM1	7
BP	GO:0051828	entry into other organism involved in symbiotic interaction	7/357	134/18670	0.0146477	0.0848269	0.0680145	CD80/CCR5/CR2/CD55/FCN1/ICAM1/IFITM1	7
BP	GO:0001787	natural killer cell proliferation	2/357	10/18670	0.0148246	0.0848269	0.0680145	IL12B/PTPN22	2
BP	GO:0018242	protein O-linked glycosylation via serine	2/357	10/18670	0.0148246	0.0848269	0.0680145	GALNT13/MGAT5B	2
BP	GO:0032621	interleukin-18 production	2/357	10/18670	0.0148246	0.0848269	0.0680145	TLR2/GBP5	2
BP	GO:0035845	photoreceptor cell outer segment organization	2/357	10/18670	0.0148246	0.0848269	0.0680145	CDHR1/NPHP4	2
BP	GO:0050861	positive regulation of B cell receptor signaling pathway	2/357	10/18670	0.0148246	0.0848269	0.0680145	PRKCB/STAP1	2
BP	GO:0071104	response to interleukin-9	2/357	10/18670	0.0148246	0.0848269	0.0680145	JAK3/STAT1	2
BP	GO:0097278	complement-dependent cytotoxicity	2/357	10/18670	0.0148246	0.0848269	0.0680145	CD55/CFH	2
BP	GO:0140052	cellular response to oxidised low-density lipoprotein particle stimulus	2/357	10/18670	0.0148246	0.0848269	0.0680145	TLR6/SMPD3	2
BP	GO:2000109	regulation of macrophage apoptotic process	2/357	10/18670	0.0148246	0.0848269	0.0680145	CCR5/CCL5	2
BP	GO:0070671	response to interleukin-12	4/357	50/18670	0.0151704	0.0865211	0.0693729	IFNG/IL12B/MSN/STAT4	4
BP	GO:0097035	regulation of membrane lipid distribution	4/357	50/18670	0.0151704	0.0865211	0.0693729	KCNN4/ATP8A2/ATP8B3/ANO9	4
BP	GO:0045165	cell fate commitment	11/357	270/18670	0.0152085	0.0865962	0.0694332	RUNX2/GATA3/IL12B/IRF4/WNT1/WNT10B/TBX21/CYP26B1/SLAMF8/WNT10A/SLAMF6	11
BP	GO:0001773	myeloid dendritic cell activation	3/357	28/18670	0.015943	0.0903349	0.0724308	CAMK4/CD2/IRF4	3
BP	GO:0032647	regulation of interferon-alpha production	3/357	28/18670	0.015943	0.0903349	0.0724308	STAT1/LILRA4/TLR8	3
BP	GO:0052312	modulation of transcription in other organism involved in symbiotic interaction	3/357	28/18670	0.015943	0.0903349	0.0724308	CCL3/CCL4/CCL5	3
BP	GO:0006809	nitric oxide biosynthetic process	5/357	77/18670	0.0159957	0.0904862	0.0725521	ICAM1/IFNG/TLR6/KLRK1/KLRC4-KLRK1	5
BP	GO:0032872	regulation of stress-activated MAPK cascade	10/357	237/18670	0.0161741	0.0913471	0.0732424	CD27/CD40LG/CCR7/CCL19/RASSF2/RASGRP1/TLR6/PTPN22/MDFIC/TRPV4	10
BP	GO:0046425	regulation of JAK-STAT cascade	7/357	137/18670	0.0163618	0.0922572	0.0739721	IFNG/IL12B/JAK3/CCL5/TNFRSF18/SOCS3/IL24	7
BP	GO:0051048	negative regulation of secretion	10/357	238/18670	0.0166077	0.0934922	0.0749624	CD22/TLR6/PTPN22/TLR8/BANK1/P2RY12/NLRP7/CARD17/TIFAB/CCR2	10
BP	GO:0061333	renal tubule morphogenesis	5/357	78/18670	0.0168318	0.0944479	0.0757287	FOXD1/GATA3/PBX1/WNT1/KIF26B	5
BP	GO:0070664	negative regulation of leukocyte proliferation	5/357	78/18670	0.0168318	0.0944479	0.0757287	CD80/CTLA4/TNFRSF13B/PLA2G2D/PDCD1LG2	5
BP	GO:0070302	regulation of stress-activated protein kinase signaling cascade	10/357	239/18670	0.0170498	0.0955174	0.0765862	CD27/CD40LG/CCR7/CCL19/RASSF2/RASGRP1/TLR6/PTPN22/MDFIC/TRPV4	10
BP	GO:0006813	potassium ion transport	10/357	240/18670	0.0175006	0.0974128	0.0781059	ANK2/KCNA3/KCNH1/KCNJ10/KCNN4/KEL/SLC12A3/KCNAB2/KCNQ5/P2RY12	10
BP	GO:0035025	positive regulation of Rho protein signal transduction	3/357	29/18670	0.0175357	0.0974128	0.0781059	F2RL2/P2RY10/GPR174	3
BP	GO:0070102	interleukin-6-mediated signaling pathway	3/357	29/18670	0.0175357	0.0974128	0.0781059	GFI1/STAT1/SOCS3	3
BP	GO:0070723	response to cholesterol	3/357	29/18670	0.0175357	0.0974128	0.0781059	CCR5/CCL3/MLC1	3
BP	GO:1900027	regulation of ruffle assembly	3/357	29/18670	0.0175357	0.0974128	0.0781059	ICAM1/STAP1/P2RY12	3
BP	GO:0002517	T cell tolerance induction	2/357	11/18670	0.0178921	0.0974128	0.0781059	CD3E/ICOS	2
BP	GO:0002604	regulation of dendritic cell antigen processing and presentation	2/357	11/18670	0.0178921	0.0974128	0.0781059	CCR7/CCL19	2
BP	GO:0002638	negative regulation of immunoglobulin production	2/357	11/18670	0.0178921	0.0974128	0.0781059	CD22/FCRL3	2
BP	GO:0032490	detection of molecule of bacterial origin	2/357	11/18670	0.0178921	0.0974128	0.0781059	TLR2/TLR6	2
BP	GO:0035457	cellular response to interferon-alpha	2/357	11/18670	0.0178921	0.0974128	0.0781059	GATA3/PYHIN1	2
BP	GO:0070673	response to interleukin-18	2/357	11/18670	0.0178921	0.0974128	0.0781059	ALOX5/IL18RAP	2
BP	GO:0070757	interleukin-35-mediated signaling pathway	2/357	11/18670	0.0178921	0.0974128	0.0781059	STAT1/STAT4	2
BP	GO:0072683	T cell extravasation	2/357	11/18670	0.0178921	0.0974128	0.0781059	ICAM1/CCR2	2
BP	GO:1900003	regulation of serine-type endopeptidase activity	2/357	11/18670	0.0178921	0.0974128	0.0781059	ANXA8/ANXA8L1	2
BP	GO:1902571	regulation of serine-type peptidase activity	2/357	11/18670	0.0178921	0.0974128	0.0781059	ANXA8/ANXA8L1	2
BP	GO:1903980	positive regulation of microglial cell activation	2/357	11/18670	0.0178921	0.0974128	0.0781059	CCL3/STAP1	2
BP	GO:2000318	positive regulation of T-helper 17 type immune response	2/357	11/18670	0.0178921	0.0974128	0.0781059	IL12B/PRKCQ	2
BP	GO:2000551	regulation of T-helper 2 cell cytokine production	2/357	11/18670	0.0178921	0.0974128	0.0781059	GATA3/TBX21	2
BP	GO:0072009	nephron epithelium development	6/357	109/18670	0.0183298	0.0996395	0.0798913	FOXD1/GATA3/PBX1/STAT1/WNT1/KIF26B	6
CC	GO:0009897	external side of plasma membrane	53/366	393/19717	3.03734e-30	1.00536e-27	9.8154e-28	CD1B/CD1C/CD1E/CD2/CD3D/CD3E/CD3G/CD5/CD6/CD8A/CD19/MS4A1/CD27/CD80/CD40LG/CD79A/CCR1/CCR4/CCR5/CCR7/CCR8/CTLA4/FCN1/GP1BA/XCR1/CXCR3/ICAM1/IL5RA/IL7R/IL12B/TNFRSF9/CXCL10/KLRD1/LAG3/CXCL9/PDCD1/CXCL12/VCAM1/CXCR6/CD226/KLRK1/ICOS/TLR8/CD244/CRLF2/P2RY12/ULBP1/PDCD1LG2/TNFRSF13C/FCRL6/CCR2/IGLL5/KLRC4-KLRK1	53
CC	GO:0001772	immunological synapse	9/366	36/19717	1.43504e-08	2.375e-06	2.31873e-06	RHOH/CD3E/CD6/GZMA/GZMB/ICAM1/LCK/PRKCQ/ZAP70	9
CC	GO:0045121	membrane raft	20/366	315/19717	1.98436e-06	0.000172369	0.000168286	ADD2/ANK2/BIRC3/CD2/CD8A/CD19/MS4A1/CD79A/CD55/ICAM1/KCNA3/LCK/MAL/TLR2/ZAP70/TLR6/CD226/MLC1/P2RY12/TEX101	20
CC	GO:0098857	membrane microdomain	20/366	316/19717	2.08301e-06	0.000172369	0.000168286	ADD2/ANK2/BIRC3/CD2/CD8A/CD19/MS4A1/CD79A/CD55/ICAM1/KCNA3/LCK/MAL/TLR2/ZAP70/TLR6/CD226/MLC1/P2RY12/TEX101	20
CC	GO:0098589	membrane region	20/366	328/19717	3.66867e-06	0.000242866	0.000237112	ADD2/ANK2/BIRC3/CD2/CD8A/CD19/MS4A1/CD79A/CD55/ICAM1/KCNA3/LCK/MAL/TLR2/ZAP70/TLR6/CD226/MLC1/P2RY12/TEX101	20
CC	GO:0098802	plasma membrane receptor complex	15/366	295/19717	0.000437328	0.0241259	0.0235543	CD3D/CD3E/CD3G/CD247/CD6/CD8A/CD8B/CD79A/CHRNB4/ITGA4/TLR2/ZAP70/IL18RAP/TLR6/TRAT1	15
CC	GO:0042101	T cell receptor complex	9/366	127/19717	0.000614659	0.0290646	0.028376	CD3D/CD3E/CD3G/CD247/CD6/CD8A/CD8B/ZAP70/TRAT1	9
CC	GO:0001931	uropod	3/366	13/19717	0.00157993	0.0581063	0.0567296	MSN/PIP5K1B/PSTPIP1	3
CC	GO:0031254	cell trailing edge	3/366	13/19717	0.00157993	0.0581063	0.0567296	MSN/PIP5K1B/PSTPIP1	3
MF	GO:0042379	chemokine receptor binding	17/348	66/17697	6.99065e-15	3.55125e-12	3.09796e-12	CXCL10/CXCL9/CCL3/CCL4/CCL5/CCL18/CCL19/CCL22/CCL24/CXCL11/CXCL12/STAT1/CXCL14/CXCL13/CCL4L1/CCL3L3/CCR2	17
MF	GO:0008009	chemokine activity	15/348	49/17697	1.61945e-14	4.11339e-12	3.58835e-12	CXCL10/CXCL9/CCL3/CCL4/CCL5/CCL18/CCL19/CCL22/CCL24/CXCL11/CXCL12/CXCL14/CXCL13/CCL4L1/CCL3L3	15
MF	GO:0005125	cytokine activity	24/348	220/17697	1.11651e-11	1.31663e-09	1.14858e-09	TNFSF8/CD40LG/CD70/IFNG/IL12B/CXCL10/LTB/CXCL9/CCL3/CCL4/CCL5/CCL18/CCL19/CCL22/CCL24/CXCL11/CXCL12/WNT1/IL32/CXCL14/CXCL13/IL24/CCL4L1/CCL3L3	24
MF	GO:0019957	C-C chemokine binding	10/348	24/17697	1.16753e-11	1.31663e-09	1.14858e-09	CCR1/CCR4/CCR5/CCR7/CCR8/ACKR1/XCR1/CXCR3/CXCR6/CCR2	10
MF	GO:0019956	chemokine binding	11/348	32/17697	1.2959e-11	1.31663e-09	1.14858e-09	CCR1/CCR4/CCR5/CCR7/CCR8/ACKR1/XCR1/CXCR3/ITGA4/CXCR6/CCR2	11
MF	GO:0048020	CCR chemokine receptor binding	12/348	43/17697	2.45624e-11	2.07962e-09	1.81417e-09	CCL3/CCL4/CCL5/CCL18/CCL19/CCL22/CCL24/STAT1/CXCL13/CCL4L1/CCL3L3/CCR2	12
MF	GO:0004896	cytokine receptor activity	16/348	96/17697	5.64441e-11	4.09623e-09	3.57338e-09	CCR1/CCR4/CCR5/CCR7/CCR8/XCR1/CXCR3/IL5RA/IL7R/IL12B/IL18RAP/CXCR6/IL21R/IL20RA/CRLF2/CCR2	16
MF	GO:0016493	C-C chemokine receptor activity	9/348	23/17697	2.54287e-10	1.61472e-08	1.40861e-08	CCR1/CCR4/CCR5/CCR7/CCR8/XCR1/CXCR3/CXCR6/CCR2	9
MF	GO:0001664	G protein-coupled receptor binding	25/348	280/17697	3.19797e-10	1.80507e-08	1.57467e-08	FCN1/FPR1/CXCL10/INSL3/CXCL9/PNOC/CCL3/CCL4/CCL5/CCL18/CCL19/CCL22/CCL24/CXCL11/CXCL12/STAT1/WNT1/WNT10B/CXCL14/CXCL13/WNT10A/RTP5/CCL4L1/CCL3L3/CCR2	25
MF	GO:0005126	cytokine receptor binding	25/348	286/17697	4.99996e-10	2.53998e-08	2.21577e-08	TNFSF8/CD40LG/CD70/GATA3/IFNG/IL12B/CXCL10/LTB/CXCL9/CCL3/CCL4/CCL5/CCL18/CCL19/CCL22/CCL24/CXCL11/CXCL12/STAT1/CXCL14/CXCL13/STAP1/CCL4L1/CCL3L3/CCR2	25
MF	GO:0001637	G protein-coupled chemoattractant receptor activity	9/348	26/17697	9.22918e-10	3.90702e-08	3.40832e-08	CCR1/CCR4/CCR5/CCR7/CCR8/XCR1/CXCR3/CXCR6/CCR2	9
MF	GO:0004950	chemokine receptor activity	9/348	26/17697	9.22918e-10	3.90702e-08	3.40832e-08	CCR1/CCR4/CCR5/CCR7/CCR8/XCR1/CXCR3/CXCR6/CCR2	9
MF	GO:0019955	cytokine binding	16/348	128/17697	4.50037e-09	1.7586e-07	1.53413e-07	CCR1/CCR4/CCR5/CCR7/CCR8/ACKR1/XCR1/CXCR3/IL5RA/IL12B/ITGA4/CXCR6/IL20RA/CRLF2/NLRP7/CCR2	16
MF	GO:0048018	receptor ligand activity	30/348	482/17697	2.84852e-08	1.0336e-06	9.01674e-07	TNFSF8/CD40LG/CD70/CHGB/IFNG/IL12B/CXCL10/INSL3/LTB/CXCL9/NTS/PNOC/CCL3/CCL4/CCL5/CCL18/CCL19/CCL22/CCL24/CXCL11/CXCL12/WNT1/WNT10B/IL32/CXCL14/CXCL13/IL24/WNT10A/CCL4L1/CCL3L3	30
MF	GO:0042287	MHC protein binding	9/348	40/17697	6.33542e-08	2.1456e-06	1.87173e-06	CD8A/CD8B/KLRD1/LAG3/TAP1/KLRK1/CD244/FCRL6/KLRC4-KLRK1	9
MF	GO:0015026	coreceptor activity	9/348	44/17697	1.53259e-07	4.86598e-06	4.24487e-06	CD8A/CD8B/CD80/CCR5/CCR8/ITGA4/CXCR6/LILRA4/FCRL1	9
MF	GO:0071723	lipopeptide binding	5/348	10/17697	6.64005e-07	1.9842e-05	1.73094e-05	CD1B/CD1C/CD1E/TLR2/TLR6	5
MF	GO:0045236	CXCR chemokine receptor binding	5/348	11/17697	1.19772e-06	3.38022e-05	2.94876e-05	CXCL10/CXCL9/CXCL11/CXCL12/CXCL13	5
MF	GO:0042288	MHC class I protein binding	6/348	20/17697	1.70068e-06	4.54707e-05	3.96668e-05	CD8A/CD8B/TAP1/KLRK1/CD244/KLRC4-KLRK1	6
MF	GO:0008528	G protein-coupled peptide receptor activity	13/348	146/17697	6.35122e-06	0.000161321	0.00014073	CCR1/CCR4/CCR5/CCR7/CCR8/F2RL2/FPR1/FPR2/GP1BA/XCR1/CXCR3/CXCR6/CCR2	13
MF	GO:0001653	peptide receptor activity	13/348	152/17697	9.86388e-06	0.000238612	0.000208155	CCR1/CCR4/CCR5/CCR7/CCR8/F2RL2/FPR1/FPR2/GP1BA/XCR1/CXCR3/CXCR6/CCR2	13
MF	GO:0003823	antigen binding	13/348	160/17697	1.71497e-05	0.000396003	0.000345456	CD1B/CD1C/CD1E/HLA-DRB5/IL7R/ITGA4/KIR2DL3/KLRC2/KLRD1/LAG3/TAP1/LILRA1/IGLL5	13
MF	GO:0030246	carbohydrate binding	17/348	271/17697	2.78994e-05	0.000616212	0.000537557	CD22/SIGLEC6/CHI3L1/CHI3L2/FCN1/KLRB1/KLRC2/KLRD1/KLRK1/CLEC4E/SIGLEC8/GALNT13/CLEC12A/CLEC4F/CLEC9A/CLEC17A/KLRC4-KLRK1	17
MF	GO:0001608	G protein-coupled nucleotide receptor activity	4/348	13/17697	9.1314e-05	0.0018555	0.00161866	P2RY10/GPR171/P2RY13/P2RY12	4
MF	GO:0045028	G protein-coupled purinergic nucleotide receptor activity	4/348	13/17697	9.1314e-05	0.0018555	0.00161866	P2RY10/GPR171/P2RY13/P2RY12	4
MF	GO:0023023	MHC protein complex binding	5/348	25/17697	0.000109789	0.0021451	0.0018713	CD8A/MS4A1/HLA-DOB/KLRC2/KLRD1	5
MF	GO:0005164	tumor necrosis factor receptor binding	5/348	31/17697	0.000318727	0.00599679	0.00523135	TNFSF8/CD40LG/CD70/LTB/STAT1	5
MF	GO:0001614	purinergic nucleotide receptor activity	4/348	20/17697	0.000554917	0.00972062	0.00847986	P2RY10/GPR171/P2RY13/P2RY12	4
MF	GO:0016502	nucleotide receptor activity	4/348	20/17697	0.000554917	0.00972062	0.00847986	P2RY10/GPR171/P2RY13/P2RY12	4
MF	GO:0038187	pattern recognition receptor activity	4/348	21/17697	0.000674931	0.0114288	0.00997003	FCN1/TLR2/CLEC4E/TLR8	4
MF	GO:0035586	purinergic receptor activity	4/348	25/17697	0.00134083	0.0219723	0.0191677	P2RY10/GPR171/P2RY13/P2RY12	4
MF	GO:0004435	phosphatidylinositol phospholipase C activity	4/348	26/17697	0.0015603	0.0247698	0.0216081	CCR1/CCR5/F2RL2/CCL5	4
MF	GO:0004715	non-membrane spanning protein tyrosine kinase activity	5/348	46/17697	0.00202131	0.0300723	0.0262338	ITK/JAK3/LCK/ZAP70/STYK1	5
MF	GO:0032813	tumor necrosis factor receptor superfamily binding	5/348	46/17697	0.00202131	0.0300723	0.0262338	TNFSF8/CD40LG/CD70/LTB/STAT1	5
MF	GO:0004629	phospholipase C activity	4/348	28/17697	0.00207191	0.0300723	0.0262338	CCR1/CCR5/F2RL2/CCL5	4
MF	GO:0001228	DNA-binding transcription activator activity, RNA polymerase II-specific	18/348	439/17697	0.00280105	0.0395259	0.0344807	RUNX2/RUNX1/EGR2/ESRRG/FOXD1/NR5A2/GATA3/IRF4/NFATC1/PBX1/PLAGL1/SPIB/STAT1/STAT4/BARX2/IKZF3/TBX21/MIXL1	18
MF	GO:0005070	SH3/SH2 adaptor activity	5/348	52/17697	0.00348243	0.0466591	0.0407035	SH2D1A/SH2D2A/STAP1/FCRL2/CLNK	5
MF	GO:0004697	protein kinase C activity	3/348	16/17697	0.00349025	0.0466591	0.0407035	PRKCB/PRKCQ/CCL3	3
MF	GO:0004620	phospholipase activity	7/348	102/17697	0.00400704	0.0521943	0.0455321	CCR1/CCR5/F2RL2/CCL5/PLA2G4C/PLA2G2D/SMPD3	7
MF	GO:0035591	signaling adaptor activity	6/348	80/17697	0.00490949	0.0623505	0.0543919	SH2D1A/SH2D2A/STAP1/TRAT1/FCRL2/CLNK	6
MF	GO:0042169	SH2 domain binding	4/348	36/17697	0.00526994	0.0652959	0.0569614	LCK/SIT1/LAX1/TRPV4	4
MF	GO:0004869	cysteine-type endopeptidase inhibitor activity	5/348	58/17697	0.00558067	0.0674995	0.0588837	BIRC3/CD27/CST7/TNFAIP8/CARD17	5
MF	GO:0008329	signaling pattern recognition receptor activity	3/348	20/17697	0.00670415	0.0792025	0.069093	FCN1/TLR2/TLR8	3
MF	GO:0001784	phosphotyrosine residue binding	4/348	40/17697	0.00768985	0.0887828	0.0774504	LCK/ZAP70/SOCS3/STAP1	4
KEGG	hsa04060	Cytokine-cytokine receptor interaction	45/204	295/8076	1.80405e-23	4.00498e-21	3.34223e-21	TNFRSF17/CD27/TNFRSF8/TNFSF8/CD40LG/CD70/CCR1/CCR4/CCR5/CCR7/CCR8/XCR1/CXCR3/IFNG/IL5RA/IL7R/IL12B/TNFRSF9/CXCL10/LTB/CXCL9/CCL3/CCL4/CCL5/CCL18/CCL19/CCL22/CCL24/CXCL11/CXCL12/TNFRSF18/IL18RAP/IL32/CXCL14/CXCL13/CXCR6/IL24/TNFRSF13B/IL21R/IL20RA/CRLF2/TNFRSF13C/CCL4L1/CCL3L3/CCR2	45
KEGG	hsa04061	Viral protein interaction with cytokine and cytokine receptor	26/204	100/8076	8.10919e-20	9.0012e-18	7.51167e-18	CCR1/CCR4/CCR5/CCR7/CCR8/XCR1/CXCR3/CXCL10/CXCL9/CCL3/CCL4/CCL5/CCL18/CCL19/CCL22/CCL24/CXCL11/CXCL12/IL18RAP/CXCL14/CXCL13/IL24/IL20RA/CCL4L1/CCL3L3/CCR2	26
KEGG	hsa04062	Chemokine signaling pathway	30/204	192/8076	4.56218e-16	3.37601e-14	2.81735e-14	CCR1/CCR4/CCR5/CCR7/CCR8/XCR1/CXCR3/CXCL10/ITK/JAK3/CXCL9/PIK3CG/PRKCB/CCL3/CCL4/CCL5/CCL18/CCL19/CCL22/CCL24/CXCL11/CXCL12/STAT1/CXCL14/CXCL13/CXCR6/PREX1/CCL4L1/CCL3L3/CCR2	30
KEGG	hsa04640	Hematopoietic cell lineage	22/204	99/8076	2.40116e-15	1.33265e-13	1.11212e-13	CD1B/CD1C/CD1E/CD2/CD3D/CD3E/CD3G/CD5/CD8A/CD8B/CD19/MS4A1/CD22/CD38/CR2/CD55/GP1BA/HLA-DOB/HLA-DRB5/IL5RA/IL7R/ITGA4	22
KEGG	hsa05340	Primary immunodeficiency	15/204	38/8076	6.03366e-15	2.67895e-13	2.23563e-13	CD3D/CD3E/CD8A/CD8B/CD19/CD40LG/CD79A/IL7R/JAK3/LCK/TAP1/ZAP70/TNFRSF13B/ICOS/TNFRSF13C	15
KEGG	hsa04658	Th1 and Th2 cell differentiation	18/204	92/8076	9.40838e-12	3.4811e-10	2.90504e-10	RUNX3/CD3D/CD3E/CD3G/CD247/GATA3/HLA-DOB/HLA-DRB5/IFNG/IL12B/JAK3/LCK/NFATC1/PRKCQ/STAT1/STAT4/ZAP70/TBX21	18
KEGG	hsa04659	Th17 cell differentiation	18/204	107/8076	1.33248e-10	4.22587e-09	3.52657e-09	RUNX1/CD3D/CD3E/CD3G/CD247/GATA3/HLA-DOB/HLA-DRB5/IFNG/IRF4/JAK3/LCK/NFATC1/PRKCQ/STAT1/ZAP70/TBX21/IL21R	18
KEGG	hsa04660	T cell receptor signaling pathway	17/204	104/8076	7.08178e-10	1.9652e-08	1.63999e-08	CD3D/CD3E/CD3G/CD247/CD8A/CD8B/CD40LG/CTLA4/IFNG/ITK/LCK/NFATC1/PDCD1/PRKCQ/ZAP70/RASGRP1/ICOS	17
KEGG	hsa04650	Natural killer cell mediated cytotoxicity	18/204	131/8076	3.99513e-09	9.85465e-08	8.22389e-08	CD247/GZMB/ICAM1/IFNG/KIR2DL3/KLRC2/KLRD1/LCK/SH2D1A/NFATC1/PRF1/PRKCB/ZAP70/KLRK1/CD244/ULBP1/NCR3/KLRC4-KLRK1	18
KEGG	hsa04514	Cell adhesion molecules	19/204	149/8076	5.18947e-09	1.15206e-07	9.61418e-08	CD2/CD6/CD8A/CD8B/CD22/CD80/CD40LG/CTLA4/HLA-DOB/HLA-DRB5/ICAM1/ITGA4/PDCD1/VCAM1/CD226/ICOS/PDCD1LG2/NTNG2/TIGIT	19
KEGG	hsa05321	Inflammatory bowel disease	12/204	65/8076	6.07344e-08	1.22573e-06	1.02289e-06	GATA3/HLA-DOB/HLA-DRB5/IFNG/IL12B/NFATC1/STAT1/STAT4/TLR2/IL18RAP/TBX21/IL21R	12
KEGG	hsa04672	Intestinal immune network for IgA production	10/204	49/8076	2.95346e-07	4.47361e-06	3.73331e-06	TNFRSF17/CD80/CD40LG/HLA-DOB/HLA-DRB5/ITGA4/CXCL12/TNFRSF13B/ICOS/TNFRSF13C	10
KEGG	hsa04064	NF-kappa B signaling pathway	14/204	104/8076	2.96254e-07	4.47361e-06	3.73331e-06	BIRC3/CD40LG/ICAM1/LCK/LTB/PRKCB/PRKCQ/CCL4/CCL19/CXCL12/VCAM1/ZAP70/TNFRSF13C/CCL4L1	14
KEGG	hsa04620	Toll-like receptor signaling pathway	14/204	104/8076	2.96254e-07	4.47361e-06	3.73331e-06	CD80/IL12B/CXCL10/CXCL9/CCL3/CCL4/CCL5/CXCL11/STAT1/TLR2/TLR6/TLR8/CCL4L1/CCL3L3	14
KEGG	hsa05235	PD-L1 expression and PD-1 checkpoint pathway in cancer	13/204	89/8076	3.02271e-07	4.47361e-06	3.73331e-06	CD3D/CD3E/CD3G/CD247/IFNG/LCK/NFATC1/PDCD1/PRKCQ/STAT1/TLR2/ZAP70/RASGRP1	13
KEGG	hsa05323	Rheumatoid arthritis	12/204	93/8076	3.37637e-06	4.54303e-05	3.79124e-05	CD80/CTLA4/HLA-DOB/HLA-DRB5/ICAM1/IFNG/LTB/CCL3/CCL5/CXCL12/TLR2/CCL3L3	12
KEGG	hsa05144	Malaria	9/204	50/8076	3.58364e-06	4.54303e-05	3.79124e-05	CD40LG/ACKR1/ICAM1/IFNG/KLRB1/TLR2/VCAM1/KLRK1/KLRC4-KLRK1	9
KEGG	hsa05330	Allograft rejection	8/204	38/8076	3.68354e-06	4.54303e-05	3.79124e-05	CD80/CD40LG/GZMB/HLA-DOB/HLA-DRB5/IFNG/IL12B/PRF1	8
KEGG	hsa05332	Graft-versus-host disease	8/204	42/8076	8.15106e-06	9.52387e-05	7.94785e-05	CD80/GZMB/HLA-DOB/HLA-DRB5/IFNG/KIR2DL3/KLRD1/PRF1	8
KEGG	hsa05142	Chagas disease	12/204	102/8076	8.97084e-06	9.95764e-05	8.30983e-05	CD3D/CD3E/CD3G/CD247/IFNG/IL12B/PPP2R2B/CCL3/CCL5/TLR2/TLR6/CCL3L3	12
KEGG	hsa05169	Epstein-Barr virus infection	17/204	202/8076	1.27048e-05	0.000134308	0.000112082	CCND1/RUNX3/CD3D/CD3E/CD3G/CD247/CD19/CR2/DDB2/HLA-DOB/HLA-DRB5/ICAM1/CXCL10/JAK3/STAT1/TAP1/TLR2	17
KEGG	hsa04612	Antigen processing and presentation	10/204	78/8076	2.38948e-05	0.00024112	0.000201219	CD8A/CD8B/HLA-DOB/HLA-DRB5/IFNG/KIR2DL3/KIR2DL4/KLRC2/KLRD1/TAP1	10
KEGG	hsa04662	B cell receptor signaling pathway	10/204	82/8076	3.72084e-05	0.000359142	0.000299711	CD19/CD22/CD79A/CR2/NFATC1/PRKCB/IFITM1/LILRA1/LILRA4/DAPP1	10
KEGG	hsa04940	Type I diabetes mellitus	7/204	43/8076	8.81171e-05	0.000815083	0.000680202	CD80/GZMB/HLA-DOB/HLA-DRB5/IFNG/IL12B/PRF1	7
KEGG	hsa05145	Toxoplasmosis	11/204	112/8076	0.000114998	0.00102118	0.000852197	ALOX5/BIRC3/CD40LG/CCR5/HLA-DOB/HLA-DRB5/IFNG/IL12B/PIK3CG/STAT1/TLR2	11
KEGG	hsa05416	Viral myocarditis	8/204	60/8076	0.000119663	0.00102174	0.000852658	CCND1/CD80/CD40LG/CD55/HLA-DOB/HLA-DRB5/ICAM1/PRF1	8
KEGG	hsa04630	JAK-STAT signaling pathway	13/204	162/8076	0.00022072	0.0018148	0.00151449	CCND1/IFNG/IL5RA/IL7R/IL12B/JAK3/STAT1/STAT4/SOCS3/IL24/IL21R/IL20RA/CRLF2	13
KEGG	hsa05320	Autoimmune thyroid disease	7/204	53/8076	0.000340446	0.00269925	0.00225258	CD80/CD40LG/CTLA4/GZMB/HLA-DOB/HLA-DRB5/PRF1	7
KEGG	hsa05140	Leishmaniasis	8/204	77/8076	0.000682066	0.00522133	0.0043573	HLA-DOB/HLA-DRB5/IFNG/IL12B/ITGA4/PRKCB/STAT1/TLR2	8
KEGG	hsa04380	Osteoclast differentiation	10/204	128/8076	0.00144236	0.0106734	0.00890718	CAMK4/IFNG/LCK/NFATC1/STAT1/SOCS3/SIRPB1/LILRA1/LILRA4/SIRPG	10
KEGG	hsa05143	African trypanosomiasis	5/204	37/8076	0.00221046	0.0158298	0.0132102	ICAM1/IFNG/IL12B/PRKCB/VCAM1	5
KEGG	hsa04670	Leukocyte transendothelial migration	9/204	114/8076	0.0023038	0.0159826	0.0133378	RHOH/ICAM1/ITGA4/ITK/MSN/PRKCB/CXCL12/VCAM1/RASSF5	9
KEGG	hsa05163	Human cytomegalovirus infection	13/204	225/8076	0.00452618	0.0304488	0.0254101	CCND1/CCR1/CCR5/NFATC1/PRKCB/PTGER2/CCL3/CCL4/CCL5/CXCL12/TAP1/CCL4L1/CCL3L3	13
KEGG	hsa05162	Measles	9/204	139/8076	0.00849775	0.0554853	0.0463035	CCND1/CD3D/CD3E/CD3G/IL12B/JAK3/MSN/STAT1/TLR2	9
KEGG	hsa05166	Human T-cell leukemia virus 1 infection	12/204	219/8076	0.00943968	0.0598746	0.0499664	CCND1/CD3D/CD3E/CD3G/EGR2/HLA-DOB/HLA-DRB5/ICAM1/JAK3/LCK/NFATC1/TNFRSF13C	12
KEGG	hsa05164	Influenza A	10/204	171/8076	0.0112659	0.0694728	0.0579764	HLA-DOB/HLA-DRB5/ICAM1/IFNG/IL12B/CXCL10/PRKCB/CCL5/STAT1/SOCS3	10
KEGG	hsa05146	Amoebiasis	7/204	102/8076	0.0144745	0.0868472	0.0724756	CD1B/CD1C/CD1E/IFNG/IL12B/PRKCB/TLR2	7

## Sheet: yellow
ONTOLOGY	ID	Description	GeneRatio	BgRatio	pvalue	p.adjust	qvalue	geneID	Count
BP	GO:0000280	nuclear division	74/435	407/18670	1.20379e-44	0	3.9763e-41	BIRC5/BRCA2/BUB1/BUB1B/CCNB1/CCNE1/CDC6/CDC20/CDC25B/CDC25C/CENPE/CENPF/CHEK1/FANCD2/HSPA1B/KIF11/KIFC1/KIF25/MKI67/MSH5/MYBL2/NEK2/PLK1/RAD51/TOP2A/TTK/RAD54L/PRC1/PKMYT1/CCNE2/AURKB/PTTG1/TRIP13/KIF23/ESPL1/KNTC1/DLGAP5/KIF14/NDC80/TACC3/P3H4/KIF2C/UBE2C/ZWINT/DMC1/TPX2/NCAPH/KIF4A/MTBP/UBE2S/RACGAP1/NCAPH2/NUSAP1/ANLN/CDCA8/CENPK/NCAPG/DSCC1/C11orf80/DSN1/CDT1/KIF18A/NUF2/BRIP1/MND1/PSRC1/CHMP…	74
BP	GO:0007059	chromosome segregation	66/435	321/18670	2.56442e-43	0	4.23534e-40	BIRC5/BUB1/BUB1B/CCNB1/CCNE1/CDC6/CDC20/CENPE/CENPF/ECT2/FANCD2/KIFC1/KIF25/MKI67/NEK2/PLK1/TOP2A/TTK/PRC1/CCNE2/AURKB/PTTG1/TRIP13/KIF23/ESPL1/DLGAP5/KIF14/NDC80/TACC3/P3H4/KIF2C/ZWINT/DMC1/OIP5/NCAPH/KIF4A/SMC1B/RACGAP1/NCAPH2/NUSAP1/CDCA8/CENPQ/HJURP/SPC25/CENPK/NCAPG/DSCC1/DSN1/FAM83D/CDT1/KIF18A/NUF2/BRIP1/PSRC1/CHMP4C/CDCA5/RMI2/KIF18B/EME1/CCDC155/CDCA2/ESCO2/SKA1/SKA3/MAPK15/CENPW	66
BP	GO:0048285	organelle fission	75/435	449/18670	1.53666e-42	1.86602e-39	1.69195e-39	BIRC5/BRCA2/BUB1/BUB1B/CCNB1/CCNE1/CDC6/CDC20/CDC25B/CDC25C/CENPE/CENPF/CHEK1/FANCD2/HSPA1B/KIF11/KIFC1/KIF25/MKI67/MSH5/MYBL2/NEK2/PLK1/RAD51/TOP2A/TTK/RAD54L/PRC1/PKMYT1/CCNE2/AURKB/PTTG1/TRIP13/KIF23/ESPL1/KNTC1/DLGAP5/KIF14/NDC80/TACC3/P3H4/KIF2C/UBE2C/ZWINT/DMC1/TPX2/NCAPH/KIF4A/MTBP/UBE2S/RACGAP1/NCAPH2/NUSAP1/ANLN/CDCA8/CENPK/NCAPG/DSCC1/C11orf80/DSN1/CDT1/KIF18A/NUF2/BRIP1/MND1/PSRC1/CHMP…	75
BP	GO:0098813	nuclear chromosome segregation	57/435	262/18670	7.60624e-39	6.92738e-36	6.28115e-36	BUB1/BUB1B/CCNB1/CCNE1/CDC6/CDC20/CENPE/CENPF/ECT2/FANCD2/KIFC1/KIF25/NEK2/PLK1/TOP2A/TTK/PRC1/CCNE2/AURKB/PTTG1/TRIP13/KIF23/ESPL1/DLGAP5/KIF14/NDC80/TACC3/P3H4/KIF2C/ZWINT/DMC1/NCAPH/KIF4A/SMC1B/RACGAP1/NCAPH2/NUSAP1/CDCA8/CENPQ/CENPK/NCAPG/DSCC1/DSN1/FAM83D/CDT1/KIF18A/NUF2/BRIP1/PSRC1/CHMP4C/CDCA5/RMI2/KIF18B/EME1/CCDC155/ESCO2/MAPK15	57
BP	GO:0140014	mitotic nuclear division	55/435	264/18670	1.97839e-36	1.44145e-33	1.30699e-33	BIRC5/BUB1/BUB1B/CCNB1/CDC6/CDC20/CDC25C/CENPE/CENPF/CHEK1/HSPA1B/KIF11/KIFC1/KIF25/MKI67/MYBL2/NEK2/PLK1/TTK/PRC1/PKMYT1/AURKB/PTTG1/TRIP13/KIF23/ESPL1/KNTC1/DLGAP5/KIF14/NDC80/TACC3/KIF2C/UBE2C/ZWINT/TPX2/NCAPH/KIF4A/MTBP/UBE2S/RACGAP1/NCAPH2/NUSAP1/ANLN/CDCA8/CENPK/NCAPG/DSCC1/DSN1/CDT1/KIF18A/NUF2/PSRC1/CHMP4C/CDCA5/KIF18B	55
BP	GO:0000819	sister chromatid segregation	46/435	189/18670	8.8013e-34	5.34386e-31	4.84535e-31	BUB1/BUB1B/CCNB1/CDC6/CDC20/CENPE/CENPF/KIFC1/KIF25/NEK2/PLK1/TOP2A/TTK/PRC1/AURKB/PTTG1/TRIP13/KIF23/ESPL1/DLGAP5/KIF14/NDC80/TACC3/KIF2C/ZWINT/NCAPH/KIF4A/SMC1B/RACGAP1/NCAPH2/NUSAP1/CDCA8/CENPK/NCAPG/DSCC1/DSN1/CDT1/KIF18A/NUF2/PSRC1/CHMP4C/CDCA5/RMI2/KIF18B/ESCO2/MAPK15	46
BP	GO:0000070	mitotic sister chromatid segregation	41/435	151/18670	2.79627e-32	1.45526e-29	1.3195e-29	BUB1/BUB1B/CCNB1/CDC6/CDC20/CENPE/CENPF/KIFC1/KIF25/NEK2/PLK1/TTK/PRC1/AURKB/PTTG1/TRIP13/KIF23/ESPL1/DLGAP5/KIF14/NDC80/TACC3/KIF2C/ZWINT/NCAPH/KIF4A/RACGAP1/NCAPH2/NUSAP1/CDCA8/CENPK/NCAPG/DSCC1/DSN1/CDT1/KIF18A/NUF2/PSRC1/CHMP4C/CDCA5/KIF18B	41
BP	GO:0006260	DNA replication	51/435	274/18670	2.67114e-31	1.21637e-28	1.1029e-28	BARD1/BRCA2/CCNA2/CCNE1/CDK1/CDC6/CHEK1/GLI1/HMGA1/LIG1/MCM2/MCM3/MCM4/MCM5/MCM6/MCM7/ORC1/POLA1/POLE2/PRIM1/RAD51/RFC4/RRM2/CHAF1B/CDC7/CDC45/CCNE2/EXO1/RECQL4/GINS1/RNASEH2A/POLQ/WDHD1/ORC6/CACYBP/DTL/GINS2/MCM10/CLSPN/DSCC1/E2F8/ATAD5/PIF1/CDT1/BRIP1/MCM8/TICRR/RMI2/E2F7/EME1/ESCO2	51
BP	GO:0006261	DNA-dependent DNA replication	35/435	153/18670	6.23775e-25	2.5249e-22	2.28936e-22	BRCA2/CCNE1/CDC6/HMGA1/LIG1/MCM2/MCM3/MCM4/MCM5/MCM6/MCM7/ORC1/POLA1/POLE2/PRIM1/RAD51/RFC4/CDC7/CDC45/CCNE2/RECQL4/GINS1/RNASEH2A/POLQ/WDHD1/ORC6/GINS2/MCM10/DSCC1/E2F8/ATAD5/CDT1/TICRR/E2F7/EME1	35
BP	GO:0071103	DNA conformation change	46/435	327/18670	6.31346e-23	2.29999e-20	2.08544e-20	CCNB1/CDK1/CDKN2A/CENPA/CENPI/HELLS/HMGA1/MCM2/MCM3/MCM4/MCM5/MCM6/MCM7/RAD51/RFC4/TOP2A/CHAF1B/CDC45/RAD54L/RECQL4/GINS1/POLQ/OIP5/NCAPH/NCAPH2/NUSAP1/GINS2/ERCC6L/NCAPG2/CENPQ/HJURP/ASF1B/CENPK/NCAPG/CENPH/CENPM/DSCC1/CENPO/CENPU/PIF1/BRIP1/MCM8/CENPL/CDCA5/DQX1/CENPW	46
BP	GO:1901987	regulation of cell cycle phase transition	54/435	480/18670	4.61886e-22	1.52968e-19	1.38698e-19	BUB1/BUB1B/CCNB1/CCNE1/CDK1/CDC6/CDC20/CDC25A/CDC25B/CDC25C/CDKN2A/CDKN2C/CENPE/CENPF/CHEK1/E2F1/EZH2/GLI1/SFN/HMMR/NEK2/ORC1/PLK1/PRKDC/RBL1/TTK/CDC7/CDC45/AURKB/TRIP13/ESPL1/KNTC1/DLGAP5/KIF14/NDC80/PLK4/UBE2C/TPX2/MTBP/GTSE1/DTL/ANLN/CEP72/CLSPN/E2F8/ATAD5/FAM83D/CDT1/TICRR/CHMP4C/CDCA5/E2F7/STOX1/MAPK15	54
BP	GO:0044843	cell cycle G1/S phase transition	42/435	298/18670	4.84373e-21	1.47048e-18	1.3333e-18	CCNA2/CCNB1/CCNE1/CDK1/CDC6/CDC25A/CDC25C/CDKN2A/CDKN2C/CDKN3/E2F1/EZH2/GLI1/SFN/MCM2/MCM3/MCM4/MCM5/MCM6/MCM7/ORC1/POLA1/POLE2/PRIM1/PRKDC/RBL1/RRM2/TYMS/CDC7/CDC45/CCNE2/KIF14/ORC6/MTBP/GTSE1/MCM10/E2F8/FAM83D/CDT1/MCM8/IQGAP3/E2F7	42
BP	GO:0051783	regulation of nuclear division	34/435	188/18670	9.59023e-21	2.68748e-18	2.43677e-18	BUB1/BUB1B/CCNB1/CDC6/CDC20/CDC25C/CENPE/CENPF/CHEK1/HSPA1B/KIF11/KIF25/MKI67/NEK2/PLK1/TTK/PKMYT1/AURKB/PTTG1/TRIP13/ESPL1/KNTC1/DLGAP5/NDC80/TACC3/UBE2C/MTBP/NUSAP1/ANLN/CDT1/CHMP4C/CDCA5/MAPK15/FBXO43	34
BP	GO:0007088	regulation of mitotic nuclear division	32/435	164/18670	1.22976e-20	3.20001e-18	2.90149e-18	BUB1/BUB1B/CCNB1/CDC6/CDC20/CDC25C/CENPE/CENPF/CHEK1/HSPA1B/KIF11/KIF25/MKI67/NEK2/PLK1/TTK/PKMYT1/AURKB/PTTG1/TRIP13/ESPL1/KNTC1/DLGAP5/NDC80/TACC3/UBE2C/MTBP/NUSAP1/ANLN/CDT1/CHMP4C/CDCA5	32
BP	GO:1901990	regulation of mitotic cell cycle phase transition	50/435	444/18670	1.69504e-20	4.11668e-18	3.73265e-18	BUB1/BUB1B/CCNB1/CCNE1/CDK1/CDC6/CDC20/CDC25A/CDC25B/CDC25C/CDKN2A/CDKN2C/CENPE/CENPF/E2F1/EZH2/SFN/HMMR/NEK2/ORC1/PLK1/PRKDC/RBL1/TTK/CDC7/CDC45/AURKB/TRIP13/ESPL1/KNTC1/DLGAP5/KIF14/NDC80/PLK4/UBE2C/TPX2/MTBP/GTSE1/DTL/ANLN/CEP72/CLSPN/E2F8/ATAD5/CDT1/TICRR/CHMP4C/CDCA5/E2F7/STOX1	50
BP	GO:1902850	microtubule cytoskeleton organization involved in mitosis	29/435	131/18670	2.00707e-20	4.56984e-18	4.14353e-18	BIRC5/CCNB1/CDC20/CENPA/CENPE/HSPA1B/KIF11/KIFC1/MYBL2/NEK2/PLK1/STIL/TTK/PRC1/AURKB/KIF23/ESPL1/NDC80/TACC3/TPX2/KIF4A/RACGAP1/GPSM2/NUSAP1/SPC25/NUF2/PSRC1/CHMP4C/WDR62	29
BP	GO:0051321	meiotic cell cycle	38/435	249/18670	2.32636e-20	4.98526e-18	4.52021e-18	BRCA2/BUB1/BUB1B/CCNE1/CDC20/CDC25A/CDC25B/CDC25C/FANCD2/MSH5/NEK2/PLK1/RAD51/TOP2A/TTK/XRCC2/RAD54L/PKMYT1/CCNE2/EXO1/PTTG1/TRIP13/ESPL1/P3H4/DMC1/NCAPH/SMC1B/NCAPH2/C11orf80/KIF18A/NUF2/BRIP1/MND1/EME1/CCDC155/MAPK15/ASPM/FBXO43	38
BP	GO:0006270	DNA replication initiation	18/435	37/18670	3.40092e-20	6.88308e-18	6.24098e-18	CCNE1/CDC6/MCM2/MCM3/MCM4/MCM5/MCM6/MCM7/ORC1/POLA1/POLE2/PRIM1/CDC45/CCNE2/ORC6/MCM10/CDT1/TICRR	18
BP	GO:0007051	spindle organization	32/435	170/18670	3.86276e-20	7.40634e-18	6.71543e-18	BIRC5/CCNB1/CDC20/CENPE/HSPA1B/KIF11/KIFC1/MYBL2/NEK2/PLK1/STIL/TTK/PRC1/AURKB/KIF23/ESPL1/NDC80/TACC3/TPX2/KIF4A/RACGAP1/GPSM2/CEP72/SPC25/NUF2/PSRC1/CHMP4C/CCDC155/MAPK15/ASPM/WDR62/CENPW	32
BP	GO:1903046	meiotic cell cycle process	33/435	188/18670	9.50114e-20	1.73063e-17	1.56919e-17	BRCA2/BUB1/BUB1B/CCNE1/CDC20/CDC25A/CDC25B/CDC25C/FANCD2/MSH5/PLK1/RAD51/TOP2A/TTK/RAD54L/CCNE2/PTTG1/TRIP13/ESPL1/P3H4/DMC1/NCAPH/NCAPH2/C11orf80/KIF18A/NUF2/BRIP1/MND1/EME1/CCDC155/MAPK15/ASPM/FBXO43	33
BP	GO:0007052	mitotic spindle organization	26/435	106/18670	1.2135e-19	2.10513e-17	1.90875e-17	BIRC5/CCNB1/CDC20/CENPE/HSPA1B/KIF11/KIFC1/MYBL2/NEK2/PLK1/STIL/TTK/PRC1/AURKB/KIF23/NDC80/TACC3/TPX2/KIF4A/RACGAP1/GPSM2/SPC25/NUF2/PSRC1/CHMP4C/WDR62	26
BP	GO:0000082	G1/S transition of mitotic cell cycle	39/435	279/18670	1.76517e-19	2.92296e-17	2.65029e-17	CCNB1/CCNE1/CDK1/CDC6/CDC25A/CDC25C/CDKN2A/CDKN2C/CDKN3/E2F1/EZH2/SFN/MCM2/MCM3/MCM4/MCM5/MCM6/MCM7/ORC1/POLA1/POLE2/PRIM1/PRKDC/RBL1/RRM2/TYMS/CDC7/CDC45/CCNE2/KIF14/ORC6/MTBP/GTSE1/MCM10/E2F8/CDT1/MCM8/IQGAP3/E2F7	39
BP	GO:0140013	meiotic nuclear division	31/435	172/18670	5.71157e-19	9.04664e-17	8.20271e-17	BRCA2/BUB1/BUB1B/CCNE1/CDC20/CDC25B/FANCD2/MSH5/PLK1/RAD51/TOP2A/TTK/RAD54L/CCNE2/PTTG1/TRIP13/ESPL1/P3H4/DMC1/NCAPH/NCAPH2/C11orf80/KIF18A/NUF2/BRIP1/MND1/EME1/CCDC155/MAPK15/ASPM/FBXO43	31
BP	GO:0051983	regulation of chromosome segregation	25/435	103/18670	8.16512e-19	1.2394e-16	1.12378e-16	BUB1/BUB1B/CCNB1/CDC6/CDC20/CENPE/CENPF/ECT2/MKI67/NEK2/PLK1/TTK/AURKB/PTTG1/TRIP13/ESPL1/DLGAP5/NDC80/TACC3/KIF2C/RACGAP1/CDT1/CDCA5/RMI2/MAPK15	25
BP	GO:0000075	cell cycle checkpoint	33/435	216/18670	7.69853e-18	1.12183e-15	1.01718e-15	BUB1/BUB1B/CCNB1/CDK1/CDC6/CDC20/CDC25C/CENPF/CHEK1/E2F1/SFN/ORC1/PLK1/PRKDC/TOP2A/TTK/CDC45/AURKB/TRIP13/KNTC1/NDC80/ZWINT/GTSE1/DTL/CLSPN/E2F8/WDR76/CDT1/BRIP1/TICRR/CHMP4C/E2F7/EME1	33
BP	GO:0090068	positive regulation of cell cycle process	37/435	298/18670	8.38922e-17	1.17546e-14	1.0658e-14	CCNB1/CCNE1/CDK1/CDC6/CDC25A/CDC25B/CDC25C/E2F1/ECT2/EZH2/GLI1/SFN/TP73/CDC7/CDC45/AURKB/KIF23/ESPL1/DLGAP5/KIF14/NDC80/PLK4/UBE2C/MTBP/RACGAP1/GPSM2/NUSAP1/GTSE1/DTL/E2F8/ATAD5/FAM83D/CDT1/CDCA5/E2F7/STOX1/MAPK15	37
BP	GO:0051304	chromosome separation	22/435	90/18670	8.8437e-17	1.19324e-14	1.08193e-14	BUB1/BUB1B/CCNB1/CDC6/CDC20/CENPE/CENPF/PLK1/TOP2A/TTK/AURKB/PTTG1/TRIP13/ESPL1/DLGAP5/NDC80/TACC3/NCAPH/NCAPH2/CDT1/EME1/MAPK15	22
BP	GO:0044786	cell cycle DNA replication	20/435	71/18670	1.08939e-16	1.41737e-14	1.28515e-14	BRCA2/LIG1/MCM2/MCM3/MCM4/MCM5/MCM6/MCM7/POLA1/POLE2/PRIM1/RAD51/RFC4/CDC7/CDC45/GINS1/E2F8/ATAD5/CDT1/E2F7	20
BP	GO:0007093	mitotic cell cycle checkpoint	28/435	165/18670	1.54599e-16	1.94208e-14	1.76091e-14	BUB1/BUB1B/CCNB1/CDK1/CDC6/CDC20/CDC25C/CENPF/E2F1/SFN/ORC1/PLK1/PRKDC/TOP2A/TTK/AURKB/TRIP13/KNTC1/NDC80/ZWINT/GTSE1/CLSPN/E2F8/CDT1/TICRR/CHMP4C/E2F7/EME1	28
BP	GO:0010948	negative regulation of cell cycle process	40/435	361/18670	2.45757e-16	2.98431e-14	2.70591e-14	BUB1/BUB1B/CCNB1/CCNF/CDK1/CDC6/CDC20/CDC25C/CDKN2A/CDKN2C/CENPF/CHEK1/E2F1/EZH2/SFN/KIF25/NEK2/ORC1/PLK1/PRKDC/RAD51/RBL1/RRM2/TTK/CDC7/AURKB/PTTG1/TRIP13/ESPL1/NDC80/MTBP/GTSE1/DTL/CLSPN/E2F8/CDT1/TICRR/CHMP4C/E2F7/FBXO43	40
BP	GO:0006310	DNA recombination	36/435	292/18670	2.797e-16	3.28693e-14	2.9803e-14	BRCA2/CHEK1/FANCB/MCM2/MCM3/MCM4/MCM5/MCM6/MCM7/MSH5/PRKDC/RAD51/TOP2A/TNFSF4/XRCC2/CDC7/CDC45/RAD54L/EXO1/TRIP13/RECQL4/RAD51AP1/POLQ/DMC1/CLCF1/GINS2/PARPBP/C11orf80/ATAD5/PIF1/BRIP1/MND1/MCM8/RMI2/EME1/CCDC155	36
BP	GO:0033260	nuclear DNA replication	18/435	60/18670	1.08815e-15	1.20125e-13	1.08919e-13	BRCA2/LIG1/MCM2/MCM3/MCM4/MCM5/MCM6/MCM7/POLA1/POLE2/PRIM1/RAD51/RFC4/CDC7/CDC45/GINS1/ATAD5/CDT1	18
BP	GO:0051306	mitotic sister chromatid separation	18/435	60/18670	1.08815e-15	1.20125e-13	1.08919e-13	BUB1/BUB1B/CCNB1/CDC6/CDC20/CENPE/CENPF/PLK1/TTK/AURKB/PTTG1/TRIP13/ESPL1/DLGAP5/NDC80/TACC3/NCAPH2/CDT1	18
BP	GO:0033045	regulation of sister chromatid segregation	20/435	80/18670	1.40928e-15	1.51e-13	1.36914e-13	BUB1/BUB1B/CCNB1/CDC6/CDC20/CENPE/CENPF/PLK1/TTK/AURKB/PTTG1/TRIP13/ESPL1/DLGAP5/NDC80/TACC3/CDT1/CDCA5/RMI2/MAPK15	20
BP	GO:1905818	regulation of chromosome separation	18/435	62/18670	2.08402e-15	2.16917e-13	1.96682e-13	BUB1/BUB1B/CCNB1/CDC6/CDC20/CENPE/CENPF/PLK1/TTK/AURKB/PTTG1/TRIP13/ESPL1/DLGAP5/NDC80/TACC3/CDT1/MAPK15	18
BP	GO:0045787	positive regulation of cell cycle	40/435	389/18670	3.18791e-15	3.22598e-13	2.92504e-13	BRCA2/CCNB1/CCNE1/CDK1/CDC6/CDC25A/CDC25B/CDC25C/CHEK1/E2F1/ECT2/EZH2/GLI1/SFN/TP73/CDC7/CDC45/AURKB/KIF23/ESPL1/DLGAP5/KIF14/NDC80/PLK4/UBE2C/MTBP/RACGAP1/GPSM2/NUSAP1/GTSE1/DTL/E2F8/ATAD5/FAM83D/CDT1/PSRC1/CDCA5/E2F7/STOX1/MAPK15	40
BP	GO:0006302	double-strand break repair	32/435	248/18670	3.62241e-15	3.47432e-13	3.15022e-13	BARD1/BRCA2/CHEK1/FANCB/FOXM1/MCM2/MCM3/MCM4/MCM5/MCM6/MCM7/POLA1/PRKDC/RAD51/XRCC2/CDC7/CDC45/RAD54L/TRIP13/RECQL4/RAD51AP1/POLQ/DMC1/GINS2/PARPBP/BRIP1/MCM8/CDCA5/RMI2/EME1/CCDC155/ESCO2	32
BP	GO:1901989	positive regulation of cell cycle phase transition	22/435	106/18670	3.62406e-15	3.47432e-13	3.15022e-13	CCNB1/CCNE1/CDK1/CDC6/CDC25A/CDC25B/CDC25C/EZH2/GLI1/CDC7/CDC45/ESPL1/DLGAP5/UBE2C/MTBP/DTL/ATAD5/FAM83D/CDT1/CDCA5/STOX1/MAPK15	22
BP	GO:0061982	meiosis I cell cycle process	23/435	119/18670	4.38868e-15	4.09947e-13	3.71705e-13	BRCA2/CCNE1/CDC25A/CDC25B/CDC25C/FANCD2/MSH5/PLK1/RAD51/TOP2A/RAD54L/CCNE2/PTTG1/TRIP13/ESPL1/P3H4/DMC1/C11orf80/BRIP1/MND1/EME1/CCDC155/MAPK15	23
BP	GO:0044784	metaphase/anaphase transition of cell cycle	17/435	56/18670	5.48937e-15	4.99944e-13	4.53306e-13	BUB1/BUB1B/CCNB1/CDC6/CDC20/CENPE/CENPF/PLK1/TTK/AURKB/TRIP13/ESPL1/DLGAP5/NDC80/TACC3/CDT1/MAPK15	17
BP	GO:0010965	regulation of mitotic sister chromatid separation	17/435	57/18670	7.65692e-15	6.80345e-13	6.16878e-13	BUB1/BUB1B/CCNB1/CDC6/CDC20/CENPE/CENPF/PLK1/TTK/AURKB/PTTG1/TRIP13/ESPL1/DLGAP5/NDC80/TACC3/CDT1	17
BP	GO:0045132	meiotic chromosome segregation	20/435	90/18670	1.64043e-14	1.42288e-12	1.29014e-12	BUB1/BUB1B/CCNE1/FANCD2/PLK1/TOP2A/TTK/CCNE2/PTTG1/TRIP13/ESPL1/P3H4/DMC1/NCAPH/NCAPH2/NUF2/BRIP1/EME1/CCDC155/MAPK15	20
BP	GO:0045930	negative regulation of mitotic cell cycle	36/435	338/18670	2.80121e-14	2.37321e-12	2.15182e-12	BUB1/BUB1B/CCNB1/CDK1/CDC6/CDC20/CDC25C/CDKN2A/CDKN2C/CENPF/CHEK1/E2F1/EZH2/SFN/KIF25/ORC1/PLK1/PRKDC/RBL1/TOP2A/TTK/AURKB/PTTG1/TRIP13/KNTC1/NDC80/ZWINT/MTBP/GTSE1/CLSPN/E2F8/CDT1/TICRR/CHMP4C/E2F7/EME1	36
BP	GO:1902099	regulation of metaphase/anaphase transition of cell cycle	16/435	53/18670	3.86764e-14	3.20223e-12	2.9035e-12	BUB1/BUB1B/CCNB1/CDC6/CDC20/CENPE/CENPF/PLK1/TTK/AURKB/TRIP13/ESPL1/DLGAP5/NDC80/CDT1/MAPK15	16
BP	GO:0032392	DNA geometric change	22/435	119/18670	4.59617e-14	3.72086e-12	3.37375e-12	HMGA1/MCM2/MCM3/MCM4/MCM5/MCM6/MCM7/RAD51/RFC4/TOP2A/CDC45/RAD54L/RECQL4/GINS1/POLQ/GINS2/ERCC6L/DSCC1/PIF1/BRIP1/MCM8/DQX1	22
BP	GO:0007091	metaphase/anaphase transition of mitotic cell cycle	16/435	54/18670	5.38004e-14	4.26076e-12	3.86329e-12	BUB1/BUB1B/CCNB1/CDC6/CDC20/CENPE/CENPF/PLK1/TTK/AURKB/TRIP13/ESPL1/DLGAP5/NDC80/TACC3/CDT1	16
BP	GO:0000724	double-strand break repair via homologous recombination	23/435	134/18670	6.40001e-14	4.96069e-12	4.49792e-12	BRCA2/CHEK1/FANCB/MCM2/MCM3/MCM4/MCM5/MCM6/MCM7/RAD51/XRCC2/CDC7/CDC45/RAD54L/RECQL4/RAD51AP1/POLQ/DMC1/GINS2/PARPBP/MCM8/RMI2/CCDC155	23
BP	GO:0000725	recombinational repair	23/435	135/18670	7.55077e-14	5.73072e-12	5.19612e-12	BRCA2/CHEK1/FANCB/MCM2/MCM3/MCM4/MCM5/MCM6/MCM7/RAD51/XRCC2/CDC7/CDC45/RAD54L/RECQL4/RAD51AP1/POLQ/DMC1/GINS2/PARPBP/MCM8/RMI2/CCDC155	23
BP	GO:0051303	establishment of chromosome localization	18/435	75/18670	8.15993e-14	6.06666e-12	5.50072e-12	CCNB1/CENPE/CENPF/KIFC1/DLGAP5/KIF14/NDC80/KIF2C/CDCA8/CENPQ/FAM83D/CDT1/KIF18A/NUF2/PSRC1/CHMP4C/CDCA5/CCDC155	18
BP	GO:0032508	DNA duplex unwinding	21/435	110/18670	8.97378e-14	6.5383e-12	5.92836e-12	HMGA1/MCM2/MCM3/MCM4/MCM5/MCM6/MCM7/RAD51/RFC4/TOP2A/CDC45/RECQL4/GINS1/POLQ/GINS2/ERCC6L/DSCC1/PIF1/BRIP1/MCM8/DQX1	21
BP	GO:0000727	double-strand break repair via break-induced replication	9/435	11/18670	9.8423e-14	7.03049e-12	6.37464e-12	MCM2/MCM3/MCM4/MCM5/MCM6/MCM7/CDC7/CDC45/GINS2	9
BP	GO:0050000	chromosome localization	18/435	76/18670	1.0466e-13	7.33225e-12	6.64826e-12	CCNB1/CENPE/CENPF/KIFC1/DLGAP5/KIF14/NDC80/KIF2C/CDCA8/CENPQ/FAM83D/CDT1/KIF18A/NUF2/PSRC1/CHMP4C/CDCA5/CCDC155	18
BP	GO:1902969	mitotic DNA replication	10/435	15/18670	1.15179e-13	7.91691e-12	7.17837e-12	BRCA2/LIG1/MCM2/MCM3/MCM4/MCM6/POLA1/RAD51/CDC45/GINS1	10
BP	GO:0051310	metaphase plate congression	16/435	57/18670	1.38514e-13	9.34459e-12	8.47287e-12	CCNB1/CENPE/CENPF/KIFC1/KIF14/NDC80/KIF2C/CDCA8/CENPQ/FAM83D/CDT1/KIF18A/NUF2/PSRC1/CHMP4C/CDCA5	16
BP	GO:0033047	regulation of mitotic sister chromatid segregation	17/435	68/18670	1.94835e-13	1.29052e-11	1.17013e-11	BUB1/BUB1B/CCNB1/CDC6/CDC20/CENPE/CENPF/PLK1/TTK/AURKB/PTTG1/TRIP13/ESPL1/DLGAP5/NDC80/TACC3/CDT1	17
BP	GO:0051784	negative regulation of nuclear division	16/435	60/18670	3.35699e-13	2.18384e-11	1.98012e-11	BUB1/BUB1B/CCNB1/CDC20/CENPF/CHEK1/KIF25/PLK1/TTK/AURKB/PTTG1/TRIP13/NDC80/MTBP/CDT1/FBXO43	16
BP	GO:0030071	regulation of mitotic metaphase/anaphase transition	15/435	51/18670	3.77484e-13	2.41258e-11	2.18752e-11	BUB1/BUB1B/CCNB1/CDC6/CDC20/CENPE/CENPF/PLK1/TTK/AURKB/TRIP13/ESPL1/DLGAP5/NDC80/CDT1	15
BP	GO:0045839	negative regulation of mitotic nuclear division	15/435	52/18670	5.19335e-13	3.26196e-11	2.95767e-11	BUB1/BUB1B/CCNB1/CDC20/CENPF/CHEK1/KIF25/PLK1/TTK/AURKB/PTTG1/TRIP13/NDC80/MTBP/CDT1	15
BP	GO:0006323	DNA packaging	27/435	210/18670	5.9517e-13	3.67492e-11	3.3321e-11	CCNB1/CDK1/CDKN2A/CENPA/CENPI/HELLS/HMGA1/MCM2/TOP2A/CHAF1B/OIP5/NCAPH/NCAPH2/NUSAP1/NCAPG2/CENPQ/HJURP/ASF1B/CENPK/NCAPG/CENPH/CENPM/CENPO/CENPU/CENPL/CDCA5/CENPW	27
BP	GO:0044839	cell cycle G2/M phase transition	30/435	266/18670	9.677e-13	5.87555e-11	5.32744e-11	CCNA2/CCNB1/CDK1/CDC6/CDC25A/CDC25B/CDC25C/CENPF/CHEK1/FOXM1/HMMR/NEK2/ORC1/PLK1/CDC7/PKMYT1/CCNB2/AURKB/MELK/KIF14/PLK4/TPX2/GTSE1/DTL/CEP72/CLSPN/ATAD5/TICRR/CHMP4C/STOX1	30
BP	GO:1901988	negative regulation of cell cycle phase transition	30/435	267/18670	1.06713e-12	6.37306e-11	5.77854e-11	BUB1/BUB1B/CCNB1/CDK1/CDC6/CDC20/CDC25C/CDKN2A/CDKN2C/CENPF/CHEK1/E2F1/EZH2/SFN/ORC1/PLK1/PRKDC/RBL1/TTK/AURKB/TRIP13/NDC80/GTSE1/DTL/CLSPN/E2F8/CDT1/TICRR/CHMP4C/E2F7	30
BP	GO:0034508	centromere complex assembly	15/435	56/18670	1.72971e-12	1.01634e-10	9.21531e-11	CENPA/CENPE/CENPF/CENPI/HELLS/OIP5/CENPQ/HJURP/CENPK/CENPH/CENPM/CENPO/CENPU/CENPL/CENPW	15
BP	GO:0007127	meiosis I	20/435	114/18670	1.85042e-12	1.07002e-10	9.70198e-11	BRCA2/CCNE1/CDC25B/FANCD2/MSH5/PLK1/RAD51/TOP2A/RAD54L/CCNE2/PTTG1/TRIP13/ESPL1/P3H4/DMC1/C11orf80/BRIP1/MND1/EME1/CCDC155	20
BP	GO:1901991	negative regulation of mitotic cell cycle phase transition	28/435	248/18670	5.50435e-12	3.13318e-10	2.84089e-10	BUB1/BUB1B/CCNB1/CDK1/CDC6/CDC20/CDC25C/CDKN2A/CDKN2C/CENPF/E2F1/EZH2/SFN/ORC1/PLK1/PRKDC/RBL1/TTK/AURKB/TRIP13/NDC80/GTSE1/CLSPN/E2F8/CDT1/TICRR/CHMP4C/E2F7	28
BP	GO:0051225	spindle assembly	19/435	108/18670	6.33991e-12	3.55327e-10	3.2218e-10	BIRC5/CDC20/HSPA1B/KIF11/KIFC1/MYBL2/NEK2/PLK1/AURKB/KIF23/TPX2/KIF4A/RACGAP1/GPSM2/CHMP4C/CCDC155/MAPK15/ASPM/CENPW	19
BP	GO:0007080	mitotic metaphase plate congression	13/435	44/18670	1.34418e-11	7.30874e-10	6.62693e-10	CCNB1/CENPE/KIFC1/KIF14/NDC80/KIF2C/CDCA8/CDT1/KIF18A/NUF2/PSRC1/CHMP4C/CDCA5	13
BP	GO:0033046	negative regulation of sister chromatid segregation	13/435	44/18670	1.34418e-11	7.30874e-10	6.62693e-10	BUB1/BUB1B/CCNB1/CDC20/CENPF/PLK1/TTK/AURKB/PTTG1/TRIP13/ESPL1/NDC80/CDT1	13
BP	GO:0031570	DNA integrity checkpoint	22/435	157/18670	1.53174e-11	8.2061e-10	7.44058e-10	CCNB1/CDK1/CDC6/CDC25C/CHEK1/E2F1/SFN/ORC1/PLK1/PRKDC/TOP2A/CDC45/GTSE1/DTL/CLSPN/E2F8/WDR76/CDT1/BRIP1/TICRR/E2F7/EME1	22
BP	GO:0051985	negative regulation of chromosome segregation	13/435	45/18670	1.85063e-11	9.77081e-10	8.85933e-10	BUB1/BUB1B/CCNB1/CDC20/CENPF/PLK1/TTK/AURKB/PTTG1/TRIP13/ESPL1/NDC80/CDT1	13
BP	GO:0033044	regulation of chromosome organization	32/435	342/18670	2.57957e-11	1.34248e-09	1.21725e-09	BUB1/BUB1B/CCNB1/CDC6/CDC20/CENPE/CENPF/CHEK1/HMGA1/MCM2/MKI67/MYB/NEK2/PLK1/TOP2A/TTK/NELFE/CDC45/AURKB/PTTG1/TRIP13/ESPL1/DLGAP5/NDC80/TACC3/PHF19/PIF1/TET1/CDT1/CDCA5/RMI2/MAPK15	32
BP	GO:0090307	mitotic spindle assembly	14/435	56/18670	2.68556e-11	1.37796e-09	1.24941e-09	BIRC5/CDC20/HSPA1B/KIF11/KIFC1/MYBL2/NEK2/PLK1/AURKB/KIF23/TPX2/KIF4A/RACGAP1/CHMP4C	14
BP	GO:0000086	G2/M transition of mitotic cell cycle	27/435	247/18670	2.82796e-11	1.43087e-09	1.29739e-09	CCNA2/CCNB1/CDK1/CDC6/CDC25A/CDC25B/CDC25C/CENPF/FOXM1/HMMR/NEK2/ORC1/PLK1/CDC7/PKMYT1/CCNB2/AURKB/MELK/KIF14/PLK4/TPX2/DTL/CEP72/CLSPN/TICRR/CHMP4C/STOX1	27
BP	GO:1901992	positive regulation of mitotic cell cycle phase transition	17/435	91/18670	3.04712e-11	1.52064e-09	1.37879e-09	CCNB1/CCNE1/CDK1/CDC6/CDC25A/CDC25B/CDC25C/CDC7/CDC45/ESPL1/DLGAP5/UBE2C/MTBP/DTL/CDT1/CDCA5/STOX1	17
BP	GO:0065004	protein-DNA complex assembly	27/435	248/18670	3.10621e-11	1.52918e-09	1.38653e-09	CENPA/CENPE/CENPF/CENPI/HELLS/MCM2/MCM3/MCM4/MCM5/MCM6/MCM7/RAD51/CHAF1B/CDC45/DMC1/OIP5/CENPQ/HJURP/ASF1B/CENPK/CENPH/CENPM/CENPO/CENPU/CDT1/CENPL/CENPW	27
BP	GO:1902749	regulation of cell cycle G2/M phase transition	25/435	213/18670	3.31176e-11	1.60863e-09	1.45857e-09	CCNB1/CDK1/CDC6/CDC25A/CDC25B/CDC25C/CENPF/CHEK1/HMMR/NEK2/ORC1/PLK1/CDC7/AURKB/KIF14/PLK4/TPX2/GTSE1/DTL/CEP72/CLSPN/ATAD5/TICRR/CHMP4C/STOX1	25
BP	GO:1904029	regulation of cyclin-dependent protein kinase activity	18/435	106/18670	4.24512e-11	2.03487e-09	1.84504e-09	CCNA2/CCNB1/CCNE1/CCNF/CDC6/CDC25A/CDC25C/CDKN2A/CDKN2C/CDKN3/CEBPA/SFN/PLK1/PKMYT1/CCNB2/CCNE2/PSRC1/STOX1	18
BP	GO:0031055	chromatin remodeling at centromere	13/435	48/18670	4.58945e-11	2.17135e-09	1.96879e-09	CENPA/CENPI/HELLS/OIP5/CENPQ/HJURP/CENPK/CENPH/CENPM/CENPO/CENPU/CENPL/CENPW	13
BP	GO:2000816	negative regulation of mitotic sister chromatid separation	12/435	39/18670	4.8722e-11	2.27557e-09	2.06329e-09	BUB1/BUB1B/CCNB1/CDC20/CENPF/PLK1/TTK/AURKB/PTTG1/TRIP13/NDC80/CDT1	12
BP	GO:1905819	negative regulation of chromosome separation	12/435	40/18670	6.81495e-11	3.14264e-09	2.84947e-09	BUB1/BUB1B/CCNB1/CDC20/CENPF/PLK1/TTK/AURKB/PTTG1/TRIP13/NDC80/CDT1	12
BP	GO:0033048	negative regulation of mitotic sister chromatid segregation	12/435	42/18670	1.29315e-10	5.8887e-09	5.33936e-09	BUB1/BUB1B/CCNB1/CDC20/CENPF/PLK1/TTK/AURKB/PTTG1/TRIP13/NDC80/CDT1	12
BP	GO:0007094	mitotic spindle assembly checkpoint	11/435	34/18670	1.71083e-10	7.4197e-09	6.72755e-09	BUB1/BUB1B/CCNB1/CDC20/CENPF/PLK1/TTK/AURKB/TRIP13/NDC80/CDT1	11
BP	GO:0031577	spindle checkpoint	11/435	34/18670	1.71083e-10	7.4197e-09	6.72755e-09	BUB1/BUB1B/CCNB1/CDC20/CENPF/PLK1/TTK/AURKB/TRIP13/NDC80/CDT1	11
BP	GO:0071173	spindle assembly checkpoint	11/435	34/18670	1.71083e-10	7.4197e-09	6.72755e-09	BUB1/BUB1B/CCNB1/CDC20/CENPF/PLK1/TTK/AURKB/TRIP13/NDC80/CDT1	11
BP	GO:0071174	mitotic spindle checkpoint	11/435	34/18670	1.71083e-10	7.4197e-09	6.72755e-09	BUB1/BUB1B/CCNB1/CDC20/CENPF/PLK1/TTK/AURKB/TRIP13/NDC80/CDT1	11
BP	GO:0071824	protein-DNA complex subunit organization	28/435	288/18670	1.93141e-10	8.27779e-09	7.50559e-09	CENPA/CENPE/CENPF/CENPI/HELLS/HMGA1/MCM2/MCM3/MCM4/MCM5/MCM6/MCM7/RAD51/CHAF1B/CDC45/DMC1/OIP5/CENPQ/HJURP/ASF1B/CENPK/CENPH/CENPM/CENPO/CENPU/CDT1/CENPL/CENPW	28
BP	GO:0000079	regulation of cyclin-dependent protein serine/threonine kinase activity	17/435	102/18670	2.01177e-10	8.52194e-09	7.72696e-09	CCNA2/CCNB1/CCNE1/CCNF/CDC6/CDC25A/CDC25C/CDKN2A/CDKN2C/CDKN3/CEBPA/SFN/PLK1/PKMYT1/CCNB2/CCNE2/PSRC1	17
BP	GO:0006336	DNA replication-independent nucleosome assembly	13/435	54/18670	2.32166e-10	9.67844e-09	8.77558e-09	CENPA/CENPI/OIP5/CENPQ/HJURP/ASF1B/CENPK/CENPH/CENPM/CENPO/CENPU/CENPL/CENPW	13
BP	GO:0034080	CENP-A containing nucleosome assembly	12/435	44/18670	2.36448e-10	9.67844e-09	8.77558e-09	CENPA/CENPI/OIP5/CENPQ/HJURP/CENPK/CENPH/CENPM/CENPO/CENPU/CENPL/CENPW	12
BP	GO:0061641	CENP-A containing chromatin organization	12/435	44/18670	2.36448e-10	9.67844e-09	8.77558e-09	CENPA/CENPI/OIP5/CENPQ/HJURP/CENPK/CENPH/CENPM/CENPO/CENPU/CENPL/CENPW	12
BP	GO:0006271	DNA strand elongation involved in DNA replication	9/435	20/18670	2.4939e-10	1.00948e-08	9.15306e-09	LIG1/MCM3/MCM4/MCM7/POLA1/RFC4/GINS1/RNASEH2A/GINS2	9
BP	GO:0034724	DNA replication-independent nucleosome organization	13/435	55/18670	2.97659e-10	1.19162e-08	1.08046e-08	CENPA/CENPI/OIP5/CENPQ/HJURP/ASF1B/CENPK/CENPH/CENPM/CENPO/CENPU/CENPL/CENPW	13
BP	GO:0045841	negative regulation of mitotic metaphase/anaphase transition	11/435	36/18670	3.44499e-10	1.36414e-08	1.23688e-08	BUB1/BUB1B/CCNB1/CDC20/CENPF/PLK1/TTK/AURKB/TRIP13/NDC80/CDT1	11
BP	GO:0051302	regulation of cell division	21/435	168/18670	3.93811e-10	1.54264e-08	1.39873e-08	BRCA2/CDC6/CDC25B/ECT2/SFN/MDK/PLK1/POU5F1/RBL1/PRC1/AURKB/KIF23/KIF14/KIF20A/ORC6/RACGAP1/E2F8/CHMP4C/E2F7/KIF18B/ASPM	21
BP	GO:0051383	kinetochore organization	9/435	21/18670	4.27483e-10	1.65672e-08	1.50217e-08	CENPA/CENPE/CENPF/NDC80/CENPK/CENPH/CDT1/NUF2/CENPW	9
BP	GO:1902100	negative regulation of metaphase/anaphase transition of cell cycle	11/435	37/18670	4.80063e-10	1.84092e-08	1.66918e-08	BUB1/BUB1B/CCNB1/CDC20/CENPF/PLK1/TTK/AURKB/TRIP13/NDC80/CDT1	11
BP	GO:0000910	cytokinesis	21/435	171/18670	5.48502e-10	2.08145e-08	1.88728e-08	BRCA2/CDC6/CDC25B/CENPA/ECT2/PLK1/PRC1/AURKB/KIF23/ESPL1/KIF14/KIF20A/KIF4A/RACGAP1/NUSAP1/ANLN/CEP55/E2F8/CDT1/CHMP4C/E2F7	21
BP	GO:0000083	regulation of transcription involved in G1/S transition of mitotic cell cycle	10/435	29/18670	5.73427e-10	2.1536e-08	1.9527e-08	CCNE1/CDC6/E2F1/ORC1/POLA1/RRM2/TYMS/CDC45/CDT1/E2F7	10
BP	GO:0000281	mitotic cytokinesis	14/435	73/18670	1.19232e-09	4.43227e-08	4.0188e-08	BRCA2/CENPA/ECT2/PLK1/KIF23/ESPL1/KIF20A/KIF4A/RACGAP1/NUSAP1/ANLN/CEP55/CDT1/CHMP4C	14
BP	GO:0010389	regulation of G2/M transition of mitotic cell cycle	22/435	196/18670	1.20457e-09	4.43256e-08	4.01907e-08	CCNB1/CDK1/CDC6/CDC25A/CDC25B/CDC25C/CENPF/HMMR/NEK2/ORC1/PLK1/CDC7/AURKB/KIF14/PLK4/TPX2/DTL/CEP72/CLSPN/TICRR/CHMP4C/STOX1	22
BP	GO:0045931	positive regulation of mitotic cell cycle	20/435	163/18670	1.44096e-09	5.24943e-08	4.75973e-08	BRCA2/CCNB1/CCNE1/CDK1/CDC6/CDC25A/CDC25B/CDC25C/CDC7/CDC45/ESPL1/DLGAP5/NDC80/UBE2C/MTBP/NUSAP1/DTL/CDT1/CDCA5/STOX1	20
BP	GO:0008608	attachment of spindle microtubules to kinetochore	10/435	32/18670	1.73481e-09	6.25734e-08	5.67362e-08	CCNB1/CENPE/ECT2/NEK2/AURKB/NDC80/KIF2C/RACGAP1/CDT1/NUF2	10
BP	GO:0051052	regulation of DNA metabolic process	33/435	429/18670	2.07598e-09	7.41451e-08	6.72284e-08	BRCA2/CCNA2/CDK1/CDC6/CHEK1/FANCB/FOXM1/GLI1/NEK2/PRKDC/RAD51/RFC4/TNFSF4/CDC7/AURKB/RAD51AP1/POLQ/CLCF1/CACYBP/PARPBP/DSCC1/E2F8/ATAD5/PIF1/TET1/CDT1/ZNF93/TICRR/RMI2/E2F7/ESCO2/STOX1/MAPK15	33
BP	GO:0070192	chromosome organization involved in meiotic cell cycle	13/435	65/18670	2.72585e-09	9.64104e-08	8.74167e-08	BUB1/BUB1B/CCNE1/FANCD2/RAD51/CCNE2/TRIP13/P3H4/DMC1/NCAPH/NCAPH2/BRIP1/CCDC155	13
BP	GO:0007292	female gamete generation	18/435	136/18670	2.82596e-09	9.89899e-08	8.97555e-08	AFP/BRCA2/CCNB1/CDC25B/MDK/PLK1/TOP2A/TTK/TRIP13/DMC1/NCAPH/NCAPH2/PAQR5/PABPC1L/MCM8/CCDC155/ASPM/NANOS3	18
BP	GO:0034502	protein localization to chromosome	14/435	82/18670	5.85801e-09	2.03245e-07	1.84285e-07	BRCA2/CDK1/CENPA/EZH2/PLK1/TTK/AURKB/NDC80/MTBP/CENPQ/CDT1/MCM8/CDCA5/ESCO2	14
BP	GO:0022616	DNA strand elongation	9/435	27/18670	6.01994e-09	2.06893e-07	1.87593e-07	LIG1/MCM3/MCM4/MCM7/POLA1/RFC4/GINS1/RNASEH2A/GINS2	9
BP	GO:2001251	negative regulation of chromosome organization	18/435	146/18670	8.90382e-09	3.03146e-07	2.74866e-07	BUB1/BUB1B/CCNB1/CDC20/CENPF/HMGA1/MCM2/PLK1/TOP2A/TTK/AURKB/PTTG1/TRIP13/ESPL1/NDC80/PIF1/TET1/CDT1	18
BP	GO:0061640	cytoskeleton-dependent cytokinesis	15/435	100/18670	1.05718e-08	3.53867e-07	3.20856e-07	BRCA2/CENPA/ECT2/PLK1/AURKB/KIF23/ESPL1/KIF20A/KIF4A/RACGAP1/NUSAP1/ANLN/CEP55/CDT1/CHMP4C	15
BP	GO:0006268	DNA unwinding involved in DNA replication	7/435	14/18670	1.05879e-08	3.53867e-07	3.20856e-07	HMGA1/MCM2/MCM4/MCM6/MCM7/RAD51/RECQL4	7
BP	GO:0043486	histone exchange	12/435	60/18670	1.11973e-08	3.70833e-07	3.3624e-07	CENPA/CENPI/OIP5/CENPQ/HJURP/CENPK/CENPH/CENPM/CENPO/CENPU/CENPL/CENPW	12
BP	GO:0071459	protein localization to chromosome, centromeric region	8/435	21/18670	1.27051e-08	4.16978e-07	3.7808e-07	CDK1/CENPA/TTK/AURKB/NDC80/MTBP/CENPQ/CDT1	8
BP	GO:1902751	positive regulation of cell cycle G2/M phase transition	9/435	30/18670	1.72706e-08	5.61757e-07	5.09353e-07	CCNB1/CDK1/CDC25A/CDC25B/CDC25C/CDC7/DTL/ATAD5/STOX1	9
BP	GO:0032465	regulation of cytokinesis	14/435	89/18670	1.7531e-08	5.6518e-07	5.12456e-07	BRCA2/CDC6/CDC25B/ECT2/PLK1/PRC1/AURKB/KIF23/KIF14/KIF20A/RACGAP1/E2F8/CHMP4C/E2F7	14
BP	GO:0044774	mitotic DNA integrity checkpoint	15/435	106/18670	2.38171e-08	7.61104e-07	6.90103e-07	CCNB1/CDK1/CDC6/CDC25C/E2F1/SFN/ORC1/PRKDC/TOP2A/GTSE1/CLSPN/E2F8/TICRR/E2F7/EME1	15
BP	GO:0006275	regulation of DNA replication	15/435	108/18670	3.083e-08	9.7664e-07	8.85533e-07	BRCA2/CCNA2/CDK1/CDC6/GLI1/RFC4/CDC7/CACYBP/DSCC1/E2F8/ATAD5/CDT1/TICRR/E2F7/ESCO2	15
BP	GO:0010639	negative regulation of organelle organization	29/435	395/18670	5.60529e-08	1.75816e-06	1.59415e-06	BUB1/BUB1B/CCNB1/CCNF/CDC20/CENPF/CHEK1/HMGA1/KIF25/MCM2/NEK2/PLK1/TOP2A/TTK/VIL1/AURKB/PTTG1/TRIP13/ESPL1/NDC80/TWF2/TBC1D30/SPEF1/MTBP/PIF1/TET1/CDT1/FBXO43/PFN4	29
BP	GO:0034501	protein localization to kinetochore	7/435	17/18670	5.64658e-08	1.75816e-06	1.59415e-06	CDK1/TTK/AURKB/NDC80/MTBP/CENPQ/CDT1	7
BP	GO:1902806	regulation of cell cycle G1/S phase transition	20/435	202/18670	5.82056e-08	1.79697e-06	1.62934e-06	CCNB1/CCNE1/CDK1/CDC6/CDC25C/CDKN2A/CDKN2C/E2F1/EZH2/GLI1/SFN/PRKDC/RBL1/CDC45/KIF14/MTBP/GTSE1/E2F8/FAM83D/E2F7	20
BP	GO:0031497	chromatin assembly	18/435	165/18670	6.11622e-08	1.87239e-06	1.69772e-06	CDKN2A/CENPA/CENPI/HELLS/HMGA1/MCM2/CHAF1B/OIP5/CENPQ/HJURP/ASF1B/CENPK/CENPH/CENPM/CENPO/CENPU/CENPL/CENPW	18
BP	GO:0045143	homologous chromosome segregation	11/435	57/18670	6.81118e-08	2.06776e-06	1.87487e-06	CCNE1/FANCD2/PLK1/CCNE2/PTTG1/TRIP13/ESPL1/P3H4/DMC1/BRIP1/CCDC155	11
BP	GO:0070507	regulation of microtubule cytoskeleton organization	19/435	186/18670	7.59975e-08	2.28809e-06	2.07464e-06	CCNF/CHEK1/HSPA1B/KIF11/KIF25/NEK2/PLK1/STIL/TACC3/PLK4/TPX2/SPEF1/GPSM2/KIF18A/PSRC1/CHMP4C/SKA1/SKA3/MAPK15	19
BP	GO:0072401	signal transduction involved in DNA integrity checkpoint	12/435	73/18670	1.11899e-07	3.31422e-06	3.00505e-06	CCNB1/CDK1/CDC25C/CHEK1/E2F1/SFN/PLK1/PRKDC/GTSE1/DTL/E2F8/E2F7	12
BP	GO:0072422	signal transduction involved in DNA damage checkpoint	12/435	73/18670	1.11899e-07	3.31422e-06	3.00505e-06	CCNB1/CDK1/CDC25C/CHEK1/E2F1/SFN/PLK1/PRKDC/GTSE1/DTL/E2F8/E2F7	12
BP	GO:0010971	positive regulation of G2/M transition of mitotic cell cycle	8/435	27/18670	1.22586e-07	3.60146e-06	3.2655e-06	CCNB1/CDK1/CDC25A/CDC25B/CDC25C/CDC7/DTL/STOX1	8
BP	GO:0072395	signal transduction involved in cell cycle checkpoint	12/435	74/18670	1.30777e-07	3.81137e-06	3.45582e-06	CCNB1/CDK1/CDC25C/CHEK1/E2F1/SFN/PLK1/PRKDC/GTSE1/DTL/E2F8/E2F7	12
BP	GO:0006338	chromatin remodeling	18/435	182/18670	2.72823e-07	7.88806e-06	7.15221e-06	CDKN2A/CENPA/CHEK1/CENPI/HELLS/HMGA1/MYB/OIP5/CENPQ/HJURP/CENPK/CENPH/CENPM/CENPO/CENPU/PABPC1L/CENPL/CENPW	18
BP	GO:0000077	DNA damage checkpoint	16/435	145/18670	2.83684e-07	8.13748e-06	7.37836e-06	CCNB1/CDK1/CDC25C/CHEK1/E2F1/SFN/PLK1/PRKDC/GTSE1/DTL/CLSPN/E2F8/WDR76/BRIP1/E2F7/EME1	16
BP	GO:2000045	regulation of G1/S transition of mitotic cell cycle	18/435	184/18670	3.21389e-07	9.14703e-06	8.29374e-06	CCNB1/CCNE1/CDK1/CDC6/CDC25C/CDKN2A/CDKN2C/E2F1/EZH2/SFN/PRKDC/RBL1/CDC45/KIF14/MTBP/GTSE1/E2F8/E2F7	18
BP	GO:0072331	signal transduction by p53 class mediator	22/435	267/18670	3.30759e-07	9.34073e-06	8.46937e-06	BARD1/BRCA2/CCNB1/CDK1/CDC25C/CHEK1/E2F1/E2F2/FOXM1/SFN/RFC4/TP73/EXO1/AURKB/TPX2/ANKRD2/GTSE1/E2F8/ATAD5/BRIP1/RMI2/E2F7	22
BP	GO:0007131	reciprocal meiotic recombination	10/435	53/18670	3.38569e-07	9.48774e-06	8.60266e-06	MSH5/RAD51/TOP2A/RAD54L/TRIP13/DMC1/C11orf80/BRIP1/MND1/EME1	10
BP	GO:0035825	homologous recombination	10/435	54/18670	4.06964e-07	1.13173e-05	1.02616e-05	MSH5/RAD51/TOP2A/RAD54L/TRIP13/DMC1/C11orf80/BRIP1/MND1/EME1	10
BP	GO:0042770	signal transduction in response to DNA damage	15/435	133/18670	5.02768e-07	1.38756e-05	1.25812e-05	BRCA2/CCNB1/CDK1/CDC25C/CHEK1/E2F1/FOXM1/SFN/PLK1/PRKDC/GTSE1/DTL/E2F8/ATAD5/E2F7	15
BP	GO:0006333	chromatin assembly or disassembly	18/435	191/18670	5.60011e-07	1.53393e-05	1.39083e-05	CDKN2A/CENPA/CENPI/HELLS/HMGA1/MCM2/CHAF1B/OIP5/CENPQ/HJURP/ASF1B/CENPK/CENPH/CENPM/CENPO/CENPU/CENPL/CENPW	18
BP	GO:0032886	regulation of microtubule-based process	19/435	218/18670	9.0451e-07	2.45905e-05	2.22966e-05	CCNF/CHEK1/HSPA1B/KIF11/KIF25/NEK2/PLK1/STIL/TACC3/PLK4/TPX2/SPEF1/GPSM2/KIF18A/PSRC1/CHMP4C/SKA1/SKA3/MAPK15	19
BP	GO:0043044	ATP-dependent chromatin remodeling	12/435	88/18670	9.11956e-07	2.46093e-05	2.23136e-05	CENPA/CENPI/OIP5/CENPQ/HJURP/CENPK/CENPH/CENPM/CENPO/CENPU/CENPL/CENPW	12
BP	GO:0000076	DNA replication checkpoint	6/435	16/18670	1.01539e-06	2.70005e-05	2.44817e-05	CDC6/ORC1/CDC45/CLSPN/CDT1/TICRR	6
BP	GO:0051382	kinetochore assembly	6/435	16/18670	1.01539e-06	2.70005e-05	2.44817e-05	CENPA/CENPE/CENPF/CENPK/CENPH/CENPW	6
BP	GO:0030261	chromosome condensation	9/435	47/18670	1.15785e-06	3.05655e-05	2.77142e-05	CCNB1/CDK1/TOP2A/NCAPH/NCAPH2/NUSAP1/NCAPG2/NCAPG/CDCA5	9
BP	GO:0051307	meiotic chromosome separation	7/435	25/18670	1.1875e-06	3.09882e-05	2.80974e-05	TOP2A/TTK/ESPL1/NCAPH/NCAPH2/EME1/MAPK15	7
BP	GO:0007098	centrosome cycle	14/435	124/18670	1.19087e-06	3.09882e-05	2.80974e-05	BRCA2/CCNF/CDK1/CHEK1/KIF11/KIF25/NEK2/PLK1/STIL/XRCC2/PLK4/CEP72/CHMP4C/WDR62	14
BP	GO:0045740	positive regulation of DNA replication	8/435	36/18670	1.3901e-06	3.58133e-05	3.24724e-05	CDK1/GLI1/CDC7/CACYBP/E2F8/ATAD5/CDT1/E2F7	8
BP	GO:0051653	spindle localization	9/435	48/18670	1.39596e-06	3.58133e-05	3.24724e-05	CENPA/KIF25/PLK1/ESPL1/NDC80/GPSM2/NUSAP1/CCDC155/ASPM	9
BP	GO:0006334	nucleosome assembly	15/435	145/18670	1.52804e-06	3.88496e-05	3.52255e-05	CENPA/CENPI/MCM2/CHAF1B/OIP5/CENPQ/HJURP/ASF1B/CENPK/CENPH/CENPM/CENPO/CENPU/CENPL/CENPW	15
BP	GO:0051231	spindle elongation	5/435	10/18670	1.53564e-06	3.88496e-05	3.52255e-05	PRC1/AURKB/KIF23/KIF4A/RACGAP1	5
BP	GO:0051445	regulation of meiotic cell cycle	9/435	49/18670	1.67516e-06	4.2087e-05	3.81609e-05	CDC20/CDC25A/CDC25B/CDC25C/TTK/TRIP13/MAPK15/ASPM/FBXO43	9
BP	GO:0051054	positive regulation of DNA metabolic process	19/435	228/18670	1.77681e-06	4.43349e-05	4.01991e-05	CDK1/FANCB/FOXM1/GLI1/NEK2/PRKDC/RAD51/RFC4/TNFSF4/CDC7/AURKB/CLCF1/CACYBP/DSCC1/E2F8/ATAD5/CDT1/E2F7/MAPK15	19
BP	GO:0051782	negative regulation of cell division	6/435	18/18670	2.26239e-06	5.60672e-05	5.08369e-05	AURKB/ORC6/E2F8/CHMP4C/E2F7/ASPM	6
BP	GO:0032506	cytokinetic process	8/435	39/18670	2.6584e-06	6.54361e-05	5.93318e-05	ECT2/AURKB/KIF23/KIF20A/RACGAP1/ANLN/CEP55/CHMP4C	8
BP	GO:0031023	microtubule organizing center organization	14/435	133/18670	2.77002e-06	6.7726e-05	6.14081e-05	BRCA2/CCNF/CDK1/CHEK1/KIF11/KIF25/NEK2/PLK1/STIL/XRCC2/PLK4/CEP72/CHMP4C/WDR62	14
BP	GO:0036297	interstrand cross-link repair	9/435	53/18670	3.32759e-06	8.0816e-05	7.32769e-05	FANCD2/FANCE/FANCB/RAD51/RAD51AP1/UBE2T/FANCI/MCM8/EME1	9
BP	GO:0090224	regulation of spindle organization	8/435	41/18670	3.96351e-06	9.56231e-05	8.67027e-05	HSPA1B/PLK1/TACC3/TPX2/GPSM2/PSRC1/CHMP4C/MAPK15	8
BP	GO:0048477	oogenesis	11/435	87/18670	5.52203e-06	0.000132347	0.000120001	BRCA2/CCNB1/CDC25B/MDK/TRIP13/DMC1/PAQR5/PABPC1L/CCDC155/ASPM/NANOS3	11
BP	GO:0007143	female meiotic nuclear division	7/435	31/18670	5.75626e-06	0.000137059	0.000124273	CDC25B/PLK1/TOP2A/TTK/TRIP13/NCAPH/NCAPH2	7
BP	GO:0000723	telomere maintenance	15/435	162/18670	6.09819e-06	0.000144258	0.0001308	BRCA2/CCNE1/NEK2/POLA1/POLE2/PRIM1/PRKDC/RAD51/RFC4/CCNE2/EXO1/AURKB/RECQL4/PIF1/MAPK15	15
BP	GO:0072431	signal transduction involved in mitotic G1 DNA damage checkpoint	9/435	57/18670	6.2212e-06	0.000145281	0.000131728	CCNB1/CDK1/CDC25C/E2F1/SFN/PRKDC/GTSE1/E2F8/E2F7	9
BP	GO:1902400	intracellular signal transduction involved in G1 DNA damage checkpoint	9/435	57/18670	6.2212e-06	0.000145281	0.000131728	CCNB1/CDK1/CDC25C/E2F1/SFN/PRKDC/GTSE1/E2F8/E2F7	9
BP	GO:0034728	nucleosome organization	16/435	184/18670	6.75599e-06	0.000156765	0.000142141	CENPA/CENPI/HMGA1/MCM2/CHAF1B/OIP5/CENPQ/HJURP/ASF1B/CENPK/CENPH/CENPM/CENPO/CENPU/CENPL/CENPW	16
BP	GO:2000134	negative regulation of G1/S transition of mitotic cell cycle	13/435	125/18670	7.16774e-06	0.000165266	0.000149849	CCNB1/CDK1/CDC25C/CDKN2A/CDKN2C/E2F1/EZH2/SFN/PRKDC/RBL1/GTSE1/E2F8/E2F7	13
BP	GO:0051315	attachment of mitotic spindle microtubules to kinetochore	5/435	13/18670	7.40101e-06	0.000169572	0.000153753	CENPE/NDC80/KIF2C/CDT1/NUF2	5
BP	GO:0072413	signal transduction involved in mitotic cell cycle checkpoint	9/435	59/18670	8.33906e-06	0.000187526	0.000170032	CCNB1/CDK1/CDC25C/E2F1/SFN/PRKDC/GTSE1/E2F8/E2F7	9
BP	GO:1902402	signal transduction involved in mitotic DNA damage checkpoint	9/435	59/18670	8.33906e-06	0.000187526	0.000170032	CCNB1/CDK1/CDC25C/E2F1/SFN/PRKDC/GTSE1/E2F8/E2F7	9
BP	GO:1902403	signal transduction involved in mitotic DNA integrity checkpoint	9/435	59/18670	8.33906e-06	0.000187526	0.000170032	CCNB1/CDK1/CDC25C/E2F1/SFN/PRKDC/GTSE1/E2F8/E2F7	9
BP	GO:0007129	synapsis	8/435	46/18670	9.77521e-06	0.000218473	0.000198092	CCNE1/FANCD2/CCNE2/TRIP13/P3H4/DMC1/BRIP1/CCDC155	8
BP	GO:1902807	negative regulation of cell cycle G1/S phase transition	13/435	131/18670	1.19828e-05	0.00026618	0.000241349	CCNB1/CDK1/CDC25C/CDKN2A/CDKN2C/E2F1/EZH2/SFN/PRKDC/RBL1/GTSE1/E2F8/E2F7	13
BP	GO:0007062	sister chromatid cohesion	9/435	63/18670	1.44666e-05	0.00031558	0.00028614	BUB1/BUB1B/CDC20/PLK1/ESPL1/SMC1B/DSCC1/CDCA5/ESCO2	9
BP	GO:0031571	mitotic G1 DNA damage checkpoint	9/435	63/18670	1.44666e-05	0.00031558	0.00028614	CCNB1/CDK1/CDC25C/E2F1/SFN/PRKDC/GTSE1/E2F8/E2F7	9
BP	GO:0044819	mitotic G1/S transition checkpoint	9/435	63/18670	1.44666e-05	0.00031558	0.00028614	CCNB1/CDK1/CDC25C/E2F1/SFN/PRKDC/GTSE1/E2F8/E2F7	9
BP	GO:0032200	telomere organization	15/435	175/18670	1.55162e-05	0.000336461	0.000305074	BRCA2/CCNE1/NEK2/POLA1/POLE2/PRIM1/PRKDC/RAD51/RFC4/CCNE2/EXO1/AURKB/RECQL4/PIF1/MAPK15	15
BP	GO:0044773	mitotic DNA damage checkpoint	11/435	97/18670	1.59225e-05	0.000343228	0.000311209	CCNB1/CDK1/CDC25C/E2F1/SFN/PRKDC/GTSE1/CLSPN/E2F8/E2F7/EME1	11
BP	GO:0044783	G1 DNA damage checkpoint	9/435	64/18670	1.64914e-05	0.000353402	0.000320434	CCNB1/CDK1/CDC25C/E2F1/SFN/PRKDC/GTSE1/E2F8/E2F7	9
BP	GO:0048469	cell maturation	15/435	177/18670	1.77649e-05	0.000378465	0.000343159	BFSP1/BRCA2/CCNB1/CDC25B/CEBPA/TYMS/BFSP2/TRIP13/KIF14/C1QL1/DMC1/FLVCR1/KCNIP2/SLC26A6/PABPC1L	15
BP	GO:0060236	regulation of mitotic spindle organization	7/435	37/18670	1.99754e-05	0.000423084	0.000383616	HSPA1B/PLK1/TACC3/TPX2/GPSM2/PSRC1/CHMP4C	7
BP	GO:0001556	oocyte maturation	6/435	26/18670	2.39518e-05	0.000504373	0.000457322	BRCA2/CCNB1/CDC25B/TRIP13/DMC1/PABPC1L	6
BP	GO:0007076	mitotic chromosome condensation	5/435	17/18670	3.29425e-05	0.00068952	0.000625197	NCAPH/NCAPH2/NUSAP1/NCAPG/CDCA5	5
BP	GO:0090329	regulation of DNA-dependent DNA replication	8/435	54/18670	3.31227e-05	0.00068952	0.000625197	BRCA2/RFC4/CDC7/DSCC1/E2F8/CDT1/TICRR/E2F7	8
BP	GO:0032467	positive regulation of cytokinesis	7/435	40/18670	3.40576e-05	0.000704953	0.00063919	CDC6/CDC25B/ECT2/AURKB/KIF23/KIF14/RACGAP1	7
BP	GO:0060249	anatomical structure homeostasis	25/435	437/18670	3.72221e-05	0.000766102	0.000694635	BARD1/BGLAP/BRCA2/CCNE1/HSPB1/NEK2/P2RX4/POLA1/POLE2/PRIM1/PRKDC/RAD51/RFC4/CCNE2/EXO1/AURKB/RECQL4/CIB2/NCS1/ABCA12/CLDN18/PIF1/MAPK15/ILDR2/SCX	25
BP	GO:0051984	positive regulation of chromosome segregation	6/435	28/18670	3.76768e-05	0.000771105	0.000699171	CCNB1/CDC6/ESPL1/DLGAP5/CDT1/MAPK15	6
BP	GO:0006977	DNA damage response, signal transduction by p53 class mediator resulting in cell cycle arrest	8/435	56/18670	4.34195e-05	0.000878804	0.000796823	CCNB1/CDK1/CDC25C/E2F1/SFN/GTSE1/E2F8/E2F7	8
BP	GO:0007050	cell cycle arrest	17/435	237/18670	4.34215e-05	0.000878804	0.000796823	BARD1/CCNB1/CDK1/CDC25C/CDKN2A/CDKN2C/CDKN3/E2F1/FOXM1/SFN/IL12A/TP73/MTBP/GTSE1/PRR11/E2F8/E2F7	17
BP	GO:0033314	mitotic DNA replication checkpoint	4/435	10/18670	5.46059e-05	0.00108704	0.000985638	CDC6/ORC1/CLSPN/TICRR	4
BP	GO:0051255	spindle midzone assembly	4/435	10/18670	5.46059e-05	0.00108704	0.000985638	AURKB/KIF23/KIF4A/RACGAP1	4
BP	GO:1902101	positive regulation of metaphase/anaphase transition of cell cycle	4/435	10/18670	5.46059e-05	0.00108704	0.000985638	ESPL1/DLGAP5/CDT1/MAPK15	4
BP	GO:0051293	establishment of spindle localization	7/435	43/18670	5.54276e-05	0.00109741	0.000995034	CENPA/KIF25/PLK1/ESPL1/NDC80/GPSM2/NUSAP1	7
BP	GO:0046605	regulation of centrosome cycle	8/435	58/18670	5.62573e-05	0.00110781	0.00100447	CCNF/CHEK1/KIF11/KIF25/NEK2/STIL/PLK4/CHMP4C	8
BP	GO:0071897	DNA biosynthetic process	15/435	196/18670	5.83201e-05	0.00114226	0.0010357	CENPF/LIG1/NEK2/POLA1/POLE2/RFC4/TYMS/AURKB/POLQ/DTL/DSCC1/PIF1/USP43/MAPK15/LIN9	15
BP	GO:2000779	regulation of double-strand break repair	9/435	77/18670	7.39812e-05	0.00144125	0.0013068	CHEK1/FANCB/FOXM1/PRKDC/RAD51/RAD51AP1/POLQ/PARPBP/RMI2	9
BP	GO:0010569	regulation of double-strand break repair via homologous recombination	7/435	45/18670	7.49884e-05	0.0014531	0.00131755	CHEK1/FANCB/RAD51/RAD51AP1/POLQ/PARPBP/RMI2	7
BP	GO:1905820	positive regulation of chromosome separation	4/435	11/18670	8.42313e-05	0.00162357	0.00147211	ESPL1/DLGAP5/CDT1/MAPK15	4
BP	GO:0040001	establishment of mitotic spindle localization	6/435	33/18670	0.00010037	0.00192446	0.00174494	CENPA/PLK1/ESPL1/NDC80/GPSM2/NUSAP1	6
BP	GO:0022412	cellular process involved in reproduction in multicellular organism	21/435	357/18670	0.000104922	0.00200121	0.00181453	BRCA2/CCNB1/CDC25B/DNMT3A/MDK/PLK1/TOP2A/TTK/TRIP13/DMC1/NCAPH/OSBP2/NCAPH2/PAQR5/SLC26A6/PABPC1L/KIF18A/BRIP1/CCDC155/ASPM/NANOS3	21
BP	GO:0031145	anaphase-promoting complex-dependent catabolic process	9/435	81/18670	0.000110229	0.00209149	0.00189638	BUB1B/CCNB1/CDK1/CDC20/PLK1/AURKB/PTTG1/UBE2C/UBE2S	9
BP	GO:0071158	positive regulation of cell cycle arrest	9/435	82/18670	0.00012131	0.00227047	0.00205867	CCNB1/CDK1/CDC25C/E2F1/SFN/TP73/GTSE1/E2F8/E2F7	9
BP	GO:0000018	regulation of DNA recombination	10/435	101/18670	0.000123423	0.00227047	0.00205867	CHEK1/FANCB/RAD51/TNFSF4/RAD51AP1/POLQ/CLCF1/PARPBP/ATAD5/RMI2	10
BP	GO:0002495	antigen processing and presentation of peptide antigen via MHC class II	10/435	101/18670	0.000123423	0.00227047	0.00205867	CENPE/KIF11/KIF23/AP1M2/KIF2C/KIF4A/RACGAP1/TREM2/KIF15/KIF18A	10
BP	GO:0007077	mitotic nuclear envelope disassembly	4/435	12/18670	0.000124025	0.00227047	0.00205867	CCNB1/CDK1/PLK1/CCNB2	4
BP	GO:0051988	regulation of attachment of spindle microtubules to kinetochore	4/435	12/18670	0.000124025	0.00227047	0.00205867	CCNB1/ECT2/NEK2/RACGAP1	4
BP	GO:1904668	positive regulation of ubiquitin protein ligase activity	4/435	12/18670	0.000124025	0.00227047	0.00205867	CDC20/PLK1/UBE2C/UBE2S	4
BP	GO:2000105	positive regulation of DNA-dependent DNA replication	4/435	12/18670	0.000124025	0.00227047	0.00205867	CDC7/E2F8/CDT1/E2F7	4
BP	GO:0002504	antigen processing and presentation of peptide or polysaccharide antigen via MHC class II	10/435	102/18670	0.000134045	0.00244163	0.00221386	CENPE/KIF11/KIF23/AP1M2/KIF2C/KIF4A/RACGAP1/TREM2/KIF15/KIF18A	10
BP	GO:0048146	positive regulation of fibroblast proliferation	7/435	51/18670	0.000169661	0.00307501	0.00278815	CCNA2/CCNB1/CDC6/E2F1/FN1/MYB/PRKDC	7
BP	GO:1902750	negative regulation of cell cycle G2/M phase transition	10/435	105/18670	0.000170654	0.00307768	0.00279058	CDK1/CDC6/CHEK1/ORC1/PLK1/AURKB/DTL/CLSPN/TICRR/CHMP4C	10
BP	GO:0030330	DNA damage response, signal transduction by p53 class mediator	10/435	107/18670	0.000199464	0.00357954	0.00324562	BRCA2/CCNB1/CDK1/CDC25C/E2F1/FOXM1/SFN/GTSE1/E2F8/E2F7	10
BP	GO:0048608	reproductive structure development	23/435	431/18670	0.000211383	0.00377484	0.0034227	AFP/BAK1/BRCA2/CCNF/CEBPA/GLI1/HOXA10/HOXA11/NUDT1/VDR/AKR1C3/PLK4/DMC1/LHX9/OVOL2/E2F8/KIF18A/BRIP1/LHX4/PLCD3/E2F7/ASPM/SCX	23
BP	GO:0071156	regulation of cell cycle arrest	10/435	108/18670	0.000215336	0.00382667	0.00346969	CCNB1/CDK1/CDC25C/E2F1/FOXM1/SFN/TP73/GTSE1/E2F8/E2F7	10
BP	GO:0016572	histone phosphorylation	6/435	38/18670	0.000226747	0.0040099	0.00363584	CCNA2/CCNB1/CDK1/CHEK1/PKN1/AURKB	6
BP	GO:0061458	reproductive system development	23/435	434/18670	0.000233544	0.00411015	0.00372673	AFP/BAK1/BRCA2/CCNF/CEBPA/GLI1/HOXA10/HOXA11/NUDT1/VDR/AKR1C3/PLK4/DMC1/LHX9/OVOL2/E2F8/KIF18A/BRIP1/LHX4/PLCD3/E2F7/ASPM/SCX	23
BP	GO:0007100	mitotic centrosome separation	4/435	14/18670	0.000241685	0.00423297	0.00383809	CHEK1/KIF11/KIF25/NEK2	4
BP	GO:0051299	centrosome separation	4/435	15/18670	0.000323528	0.00563929	0.00511322	CHEK1/KIF11/KIF25/NEK2	4
BP	GO:0070317	negative regulation of G0 to G1 transition	6/435	41/18670	0.000348184	0.00604017	0.00547671	CHEK1/E2F1/EZH2/RAD51/RRM2/CDC7	6
BP	GO:0090169	regulation of spindle assembly	5/435	27/18670	0.000354651	0.00612319	0.00555198	HSPA1B/PLK1/GPSM2/CHMP4C/MAPK15	5
BP	GO:0021700	developmental maturation	17/435	284/18670	0.000383818	0.00658058	0.0059667	BFSP1/BRCA2/CCNB1/CDC20/CDC25B/CEBPA/FGFR3/TYMS/BFSP2/TRIP13/KIF14/C1QL1/DMC1/FLVCR1/KCNIP2/SLC26A6/PABPC1L	17
BP	GO:0007569	cell aging	10/435	116/18670	0.000384755	0.00658058	0.0059667	BGLAP/BRCA2/CDK1/CDKN2A/CHEK1/FOXM1/HMGA1/PRKDC/RBL1/ZKSCAN3	10
BP	GO:0030397	membrane disassembly	4/435	16/18670	0.000423469	0.00714362	0.00647722	CCNB1/CDK1/PLK1/CCNB2	4
BP	GO:0051081	nuclear envelope disassembly	4/435	16/18670	0.000423469	0.00714362	0.00647722	CCNB1/CDK1/PLK1/CCNB2	4
BP	GO:0071168	protein localization to chromatin	5/435	28/18670	0.000423558	0.00714362	0.00647722	EZH2/PLK1/MCM8/CDCA5/ESCO2	5
BP	GO:0019886	antigen processing and presentation of exogenous peptide antigen via MHC class II	9/435	98/18670	0.000469782	0.00788672	0.00715099	CENPE/KIF11/KIF23/AP1M2/KIF2C/KIF4A/RACGAP1/KIF15/KIF18A	9
BP	GO:1902808	positive regulation of cell cycle G1/S phase transition	7/435	60/18670	0.000472869	0.00790211	0.00716495	CCNE1/CDC6/EZH2/GLI1/CDC45/MTBP/FAM83D	7
BP	GO:0070316	regulation of G0 to G1 transition	6/435	45/18670	0.000583157	0.00970065	0.00879571	CHEK1/E2F1/EZH2/RAD51/RRM2/CDC7	6
BP	GO:0044818	mitotic G2/M transition checkpoint	5/435	30/18670	0.000591098	0.00978805	0.00887496	CDK1/CDC6/ORC1/CLSPN/TICRR	5
BP	GO:0007548	sex differentiation	16/435	270/18670	0.000629897	0.0103833	0.00941471	AFP/BAK1/BRCA2/CENPI/HOXA10/HOXA11/NUDT1/AKR1C3/CDKL2/DMC1/LHX9/KIF18A/BRIP1/CBX2/ASPM/SCX	16
BP	GO:0014013	regulation of gliogenesis	10/435	124/18670	0.000652996	0.0107156	0.00971599	CDK1/E2F1/EZH2/MDK/MYB/P2RX4/TP73/CLCF1/TMEM98/TREM2	10
BP	GO:0048599	oocyte development	6/435	46/18670	0.000657627	0.0107432	0.00974101	BRCA2/CCNB1/CDC25B/TRIP13/DMC1/PABPC1L	6
BP	GO:0010212	response to ionizing radiation	11/435	147/18670	0.0006708	0.0109095	0.00989178	BAK1/BRCA2/DNMT3A/ECT2/FANCD2/PRKDC/RAD51/XRCC2/RAD54L/RAD51AP1/TICRR	11
BP	GO:0010458	exit from mitosis	5/435	31/18670	0.000691424	0.0110963	0.0100612	KNTC1/UBE2C/UBE2S/ANLN/CDCA5	5
BP	GO:0031572	G2 DNA damage checkpoint	5/435	31/18670	0.000691424	0.0110963	0.0100612	CDK1/CHEK1/PLK1/DTL/CLSPN	5
BP	GO:0040020	regulation of meiotic nuclear division	5/435	31/18670	0.000691424	0.0110963	0.0100612	CDC20/TTK/TRIP13/MAPK15/FBXO43	5
BP	GO:0045023	G0 to G1 transition	6/435	47/18670	0.000739254	0.0118118	0.01071	CHEK1/E2F1/EZH2/RAD51/RRM2/CDC7	6
BP	GO:0051785	positive regulation of nuclear division	7/435	66/18670	0.00084615	0.0134565	0.0122012	ESPL1/DLGAP5/UBE2C/NUSAP1/CDT1/CDCA5/MAPK15	7
BP	GO:0007096	regulation of exit from mitosis	4/435	19/18670	0.000853265	0.0134565	0.0122012	KNTC1/UBE2C/ANLN/CDCA5	4
BP	GO:2000042	negative regulation of double-strand break repair via homologous recombination	4/435	19/18670	0.000853265	0.0134565	0.0122012	FANCB/POLQ/PARPBP/RMI2	4
BP	GO:0006890	retrograde vesicle-mediated transport, Golgi to ER	8/435	86/18670	0.000883893	0.0138794	0.0125847	CENPE/KIF11/KIF23/KIF2C/KIF4A/RACGAP1/KIF15/KIF18A	8
BP	GO:0051298	centrosome duplication	7/435	67/18670	0.00092626	0.0144823	0.0131313	BRCA2/CCNF/STIL/PLK4/CEP72/CHMP4C/WDR62	7
BP	GO:0051781	positive regulation of cell division	8/435	87/18670	0.000953991	0.0148521	0.0134666	CDC6/CDC25B/ECT2/MDK/AURKB/KIF23/KIF14/RACGAP1	8
BP	GO:0007018	microtubule-based movement	16/435	283/18670	0.00103836	0.0160969	0.0145952	CENPE/HSPB1/KIF11/KIFC1/KIF25/KIF23/DLGAP5/KIF14/KIF20A/KIF2C/KIF4A/RACGAP1/KIF15/KIF18A/KIF18B/TEKT4	16
BP	GO:0009994	oocyte differentiation	6/435	51/18670	0.00114664	0.0177	0.0160488	BRCA2/CCNB1/CDC25B/TRIP13/DMC1/PABPC1L	6
BP	GO:0051294	establishment of spindle orientation	5/435	35/18670	0.00122391	0.0188131	0.0170581	CENPA/KIF25/PLK1/NDC80/GPSM2	5
BP	GO:0001701	in utero embryonic development	19/435	373/18670	0.00127242	0.0194765	0.0176596	BRCA2/CCNB1/CEBPA/NEK2/POU5F1/STIL/XRCC2/CCNB2/GINS1/PLK4/FLVCR1/NCAPG2/ASF1B/OVOL2/HS3ST6/E2F8/TET1/PLCD3/E2F7	19
BP	GO:0045840	positive regulation of mitotic nuclear division	6/435	53/18670	0.0014057	0.0214266	0.0194278	ESPL1/DLGAP5/UBE2C/NUSAP1/CDT1/CDCA5	6
BP	GO:0007568	aging	17/435	321/18670	0.00149258	0.0226561	0.0205426	BAK1/BGLAP/BRCA2/CDK1/CDKN2A/CHEK1/DNMT3A/FOXM1/HMGA1/NUDT1/PRKDC/RBL1/TYMS/RAD54L/AURKB/CACYBP/ZKSCAN3	17
BP	GO:1904666	regulation of ubiquitin protein ligase activity	4/435	22/18670	0.00152378	0.0230337	0.020885	CDC20/PLK1/UBE2C/UBE2S	4
BP	GO:0060350	endochondral bone morphogenesis	7/435	73/18670	0.00154044	0.0231893	0.0210261	COCH/FGFR3/HOXA11/MATN1/MMP16/SHOX2/SCX	7
BP	GO:1903829	positive regulation of cellular protein localization	17/435	324/18670	0.00164787	0.0247046	0.0224	CDK1/E2F1/ECT2/SFN/KCNJ11/PIK3R2/PLK1/TP73/VIL1/NDC80/ABCA12/GPSM2/GTSE1/TREM2/CENPQ/ABHD17C/CDT1	17
BP	GO:0014015	positive regulation of gliogenesis	7/435	74/18670	0.00166796	0.0249032	0.0225801	E2F1/MDK/MYB/P2RX4/TP73/CLCF1/TREM2	7
BP	GO:0044380	protein localization to cytoskeleton	6/435	55/18670	0.00170714	0.0253842	0.0230162	STIL/TTK/ANLN/CEP72/ABHD17C/FAM83D	6
BP	GO:0071695	anatomical structure maturation	11/435	165/18670	0.00172087	0.0254843	0.0231069	BRCA2/CCNB1/CDC25B/FGFR3/TYMS/TRIP13/C1QL1/DMC1/FLVCR1/KCNIP2/PABPC1L	11
BP	GO:0006298	mismatch repair	5/435	38/18670	0.00178727	0.0263604	0.0239013	LIG1/MSH5/TP73/EXO1/RNASEH2A	5
BP	GO:0045835	negative regulation of meiotic nuclear division	3/435	11/18670	0.00180302	0.0264855	0.0240147	TTK/TRIP13/FBXO43	3
BP	GO:0001824	blastocyst development	8/435	98/18670	0.00205942	0.0301305	0.0273197	BRCA2/NEK2/POU5F1/GINS1/NCAPG2/ASF1B/HS3ST6/TET1	8
BP	GO:0051446	positive regulation of meiotic cell cycle	4/435	24/18670	0.00213361	0.031091	0.0281906	CDC25A/CDC25B/CDC25C/MAPK15	4
BP	GO:0006282	regulation of DNA repair	9/435	122/18670	0.00223521	0.0324417	0.0294154	CHEK1/FANCB/FOXM1/PRKDC/RAD51/RAD51AP1/POLQ/PARPBP/RMI2	9
BP	GO:0045137	development of primary sexual characteristics	13/435	223/18670	0.00228539	0.0330384	0.0299563	AFP/BRCA2/HOXA10/HOXA11/NUDT1/AKR1C3/DMC1/LHX9/KIF18A/BRIP1/CBX2/ASPM/SCX	13
BP	GO:0031507	heterochromatin assembly	3/435	12/18670	0.00236268	0.0337539	0.0306052	CDKN2A/HELLS/HMGA1	3
BP	GO:0060707	trophoblast giant cell differentiation	3/435	12/18670	0.00236268	0.0337539	0.0306052	PLK4/E2F8/E2F7	3
BP	GO:0072697	protein localization to cell cortex	3/435	12/18670	0.00236268	0.0337539	0.0306052	PLK1/GPSM2/ANLN	3
BP	GO:2001252	positive regulation of chromosome organization	11/435	174/18670	0.00261137	0.037161	0.0336943	CCNB1/MYB/NEK2/NELFE/AURKB/ESPL1/DLGAP5/PHF19/TET1/CDT1/MAPK15	11
BP	GO:0090342	regulation of cell aging	6/435	60/18670	0.00267465	0.0379135	0.0343767	CDKN2A/FOXM1/HMGA1/PRKDC/RBL1/ZKSCAN3	6
BP	GO:0001833	inner cell mass cell proliferation	3/435	13/18670	0.00301873	0.0426249	0.0386486	BRCA2/GINS1/NCAPG2	3
BP	GO:0030866	cortical actin cytoskeleton organization	5/435	43/18670	0.00311682	0.04384	0.0397504	ECT2/VIL1/KIF23/RACGAP1/ANLN	5
BP	GO:0048145	regulation of fibroblast proliferation	7/435	83/18670	0.00322014	0.0451191	0.0409101	CCNA2/CCNB1/CDC6/E2F1/FN1/MYB/PRKDC	7
BP	GO:0032201	telomere maintenance via semi-conservative replication	4/435	27/18670	0.00333526	0.046553	0.0422103	POLA1/POLE2/PRIM1/RFC4	4
BP	GO:1901796	regulation of signal transduction by p53 class mediator	11/435	180/18670	0.00338893	0.0471217	0.0427259	BARD1/CHEK1/RFC4/TP73/EXO1/AURKB/TPX2/ANKRD2/ATAD5/BRIP1/RMI2	11
BP	GO:0048144	fibroblast proliferation	7/435	84/18670	0.00344415	0.0477073	0.0432569	CCNA2/CCNB1/CDC6/E2F1/FN1/MYB/PRKDC	7
BP	GO:0007281	germ cell development	14/435	262/18670	0.00349195	0.0481863	0.0436912	BRCA2/CCNB1/CDC25B/MDK/TRIP13/DMC1/OSBP2/PAQR5/SLC26A6/PABPC1L/BRIP1/CCDC155/ASPM/NANOS3	14
BP	GO:0016445	somatic diversification of immunoglobulins	6/435	64/18670	0.00370598	0.0505748	0.0458569	PRKDC/TNFSF4/EXO1/POLQ/CLCF1/ATAD5	6
BP	GO:0006821	chloride transport	8/435	108/18670	0.00377036	0.0505748	0.0458569	CLCN2/CLDN4/GABRD/FXYD3/BSND/GABRQ/SLC26A6/ANO4	8
BP	GO:0046606	negative regulation of centrosome cycle	3/435	14/18670	0.00377611	0.0505748	0.0458569	CCNF/KIF25/NEK2	3
BP	GO:0072425	signal transduction involved in G2 DNA damage checkpoint	3/435	14/18670	0.00377611	0.0505748	0.0458569	CHEK1/PLK1/DTL	3
BP	GO:0072498	embryonic skeletal joint development	3/435	14/18670	0.00377611	0.0505748	0.0458569	EXT1/HOXA11/SHOX2	3
BP	GO:0090231	regulation of spindle checkpoint	3/435	14/18670	0.00377611	0.0505748	0.0458569	CCNB1/NDC80/CDT1	3
BP	GO:0090266	regulation of mitotic cell cycle spindle assembly checkpoint	3/435	14/18670	0.00377611	0.0505748	0.0458569	CCNB1/NDC80/CDT1	3
BP	GO:1903504	regulation of mitotic spindle checkpoint	3/435	14/18670	0.00377611	0.0505748	0.0458569	CCNB1/NDC80/CDT1	3
BP	GO:0090344	negative regulation of cell aging	4/435	28/18670	0.00382054	0.0509825	0.0462265	FOXM1/PRKDC/RBL1/ZKSCAN3	4
BP	GO:0000132	establishment of mitotic spindle orientation	4/435	29/18670	0.00435149	0.0578558	0.0524586	CENPA/PLK1/NDC80/GPSM2	4
BP	GO:0009314	response to radiation	20/435	448/18670	0.00441101	0.0584339	0.0529828	BAK1/BRCA2/CDC25A/CHEK1/CHRNB2/DNMT3A/ECT2/FANCD2/IL12A/KCNC1/PRKDC/RAD51/XRCC2/RAD54L/AURKB/RAD51AP1/DTL/PBK/TP53I13/TICRR	20
BP	GO:1902476	chloride transmembrane transport	7/435	88/18670	0.00446078	0.0588791	0.0533864	CLCN2/CLDN4/GABRD/FXYD3/BSND/GABRQ/SLC26A6	7
BP	GO:0070365	hepatocyte differentiation	3/435	15/18670	0.00463925	0.0610137	0.0553219	MESP1/E2F8/E2F7	3
BP	GO:0031109	microtubule polymerization or depolymerization	8/435	112/18670	0.00470134	0.0616078	0.0558606	HSPA1B/KIF2C/SPEF1/KIF18A/PSRC1/KIF18B/SKA1/SKA3	8
BP	GO:0030865	cortical cytoskeleton organization	5/435	48/18670	0.00504321	0.0657716	0.059636	ECT2/VIL1/KIF23/RACGAP1/ANLN	5
BP	GO:0008406	gonad development	12/435	217/18670	0.00505519	0.0657716	0.059636	AFP/BRCA2/HOXA10/HOXA11/NUDT1/AKR1C3/DMC1/LHX9/KIF18A/BRIP1/ASPM/SCX	12
BP	GO:0008584	male gonad development	9/435	138/18670	0.00508181	0.0658827	0.0597368	HOXA10/HOXA11/NUDT1/AKR1C3/LHX9/KIF18A/BRIP1/ASPM/SCX	9
BP	GO:0046546	development of primary male sexual characteristics	9/435	139/18670	0.00532512	0.0687922	0.0623748	HOXA10/HOXA11/NUDT1/AKR1C3/LHX9/KIF18A/BRIP1/ASPM/SCX	9
BP	GO:0051447	negative regulation of meiotic cell cycle	3/435	16/18670	0.00561212	0.0722437	0.0655044	TTK/TRIP13/FBXO43	3
BP	GO:0009411	response to UV	9/435	141/18670	0.00583871	0.0748958	0.0679091	BAK1/BRCA2/CDC25A/CHEK1/IL12A/AURKB/DTL/PBK/TP53I13	9
BP	GO:0072698	protein localization to microtubule cytoskeleton	5/435	50/18670	0.0060088	0.0768072	0.0696422	STIL/TTK/CEP72/ABHD17C/FAM83D	5
BP	GO:0010972	negative regulation of G2/M transition of mitotic cell cycle	7/435	93/18670	0.00603224	0.0768372	0.0696693	CDK1/CDC6/ORC1/AURKB/CLSPN/TICRR/CHMP4C	7
BP	GO:1901976	regulation of cell cycle checkpoint	4/435	32/18670	0.00623709	0.0788949	0.0715351	CCNB1/NDC80/WDR76/CDT1	4
BP	GO:2000780	negative regulation of double-strand break repair	4/435	32/18670	0.00623709	0.0788949	0.0715351	FANCB/POLQ/PARPBP/RMI2	4
BP	GO:0015698	inorganic anion transport	10/435	169/18670	0.00637195	0.0803219	0.072829	CLCN2/CLDN4/GABRD/FXYD3/SLC5A5/BSND/RACGAP1/GABRQ/SLC26A6/ANO4	10
BP	GO:0000731	DNA synthesis involved in DNA repair	5/435	51/18670	0.0065373	0.082122	0.0744611	POLA1/POLE2/RFC4/DTL/USP43	5
BP	GO:0006266	DNA ligation	3/435	17/18670	0.00669823	0.0827175	0.0750011	LIG1/RAD51/TOP2A	3
BP	GO:0061952	midbody abscission	3/435	17/18670	0.00669823	0.0827175	0.0750011	KIF20A/CEP55/CHMP4C	3
BP	GO:0062033	positive regulation of mitotic sister chromatid segregation	3/435	17/18670	0.00669823	0.0827175	0.0750011	ESPL1/DLGAP5/CDT1	3
BP	GO:1903818	positive regulation of voltage-gated potassium channel activity	3/435	17/18670	0.00669823	0.0827175	0.0750011	KCNC1/KCNIP2/TREM2	3
BP	GO:1904355	positive regulation of telomere capping	3/435	17/18670	0.00669823	0.0827175	0.0750011	NEK2/AURKB/MAPK15	3
BP	GO:0097711	ciliary basal body-plasma membrane docking	7/435	95/18670	0.00676453	0.0832539	0.0754875	CDK1/NEK2/PLK1/PLK4/CEP72/TCTN2/FBF1	7
BP	GO:0010837	regulation of keratinocyte proliferation	4/435	33/18670	0.00696916	0.0849119	0.0769908	SFN/MDK/VDR/OVOL2	4
BP	GO:0045736	negative regulation of cyclin-dependent protein serine/threonine kinase activity	4/435	33/18670	0.00696916	0.0849119	0.0769908	CDKN2A/CDKN2C/CEBPA/PLK1	4
BP	GO:0051443	positive regulation of ubiquitin-protein transferase activity	4/435	33/18670	0.00696916	0.0849119	0.0769908	CDC20/PLK1/UBE2C/UBE2S	4
BP	GO:0031100	animal organ regeneration	6/435	73/18670	0.0070685	0.0856168	0.07763	BAK1/CCNA2/CDK1/EZH2/GLI1/TYMS	6
BP	GO:0016447	somatic recombination of immunoglobulin gene segments	5/435	52/18670	0.00709753	0.0856168	0.07763	PRKDC/TNFSF4/EXO1/CLCF1/ATAD5	5
BP	GO:2000772	regulation of cellular senescence	5/435	52/18670	0.00709753	0.0856168	0.07763	CDKN2A/HMGA1/PRKDC/RBL1/ZKSCAN3	5
BP	GO:2000241	regulation of reproductive process	9/435	146/18670	0.00729011	0.0876497	0.0794732	CDC20/CDC25A/CDC25B/CDC25C/TTK/TRIP13/MAPK15/ASPM/FBXO43	9
BP	GO:0045738	negative regulation of DNA repair	4/435	34/18670	0.00775581	0.0926375	0.0839957	FANCB/POLQ/PARPBP/RMI2	4
BP	GO:1904030	negative regulation of cyclin-dependent protein kinase activity	4/435	34/18670	0.00775581	0.0926375	0.0839957	CDKN2A/CDKN2C/CEBPA/PLK1	4
BP	GO:0002200	somatic diversification of immune receptors	6/435	75/18670	0.00804428	0.095769	0.086835	PRKDC/TNFSF4/EXO1/POLQ/CLCF1/ATAD5	6
CC	GO:0098687	chromosomal region	61/460	349/19717	1.3183e-35	5.57639e-33	4.82913e-33	BIRC5/BRCA2/BUB1/BUB1B/CCNB1/CDK1/CENPA/CENPE/CENPF/CHEK1/DNMT3A/EZH2/CENPI/HELLS/MCM2/MCM3/MCM4/MCM5/MCM6/MCM7/NEK2/ORC1/PLK1/PRKDC/RAD51/TTK/AURKB/RECQL4/KNTC1/NDC80/KIF2C/ZWINT/DMC1/OIP5/MTBP/SMC1B/ERCC6L/CDCA8/CENPQ/HJURP/SPC25/CENPK/NCAPG/CENPH/CENPM/DSCC1/CENPO/CENPU/DSN1/PIF1/CDT1/KIF18A/NUF2/CENPL/CDCA5/SPC24/CCDC155/ESCO2/SKA1/SKA3/CENPW	61
CC	GO:0000775	chromosome, centromeric region	44/460	193/19717	5.76757e-31	1.21984e-28	1.05638e-28	BIRC5/BUB1/BUB1B/CCNB1/CENPA/CENPE/CENPF/DNMT3A/CENPI/HELLS/NEK2/PLK1/TTK/AURKB/KNTC1/NDC80/KIF2C/ZWINT/OIP5/MTBP/SMC1B/ERCC6L/CDCA8/CENPQ/HJURP/SPC25/CENPK/NCAPG/CENPH/CENPM/DSCC1/CENPO/CENPU/DSN1/CDT1/KIF18A/NUF2/CENPL/CDCA5/SPC24/ESCO2/SKA1/SKA3/CENPW	44
CC	GO:0000793	condensed chromosome	44/460	223/19717	3.82025e-28	5.38656e-26	4.66473e-26	BIRC5/BRCA2/BUB1/BUB1B/CCNB1/CENPA/CENPE/CENPF/CHEK1/FANCD2/MKI67/NEK2/PLK1/RAD51/TOP2A/AURKB/KNTC1/NDC80/P3H4/KIF2C/ZWINT/DMC1/NCAPH/SMC1B/NCAPH2/ERCC6L/NCAPG2/HJURP/SPC25/CENPK/NCAPG/CENPH/CENPM/CENPO/CENPU/DSN1/CDT1/NUF2/CDCA5/SPC24/CCDC155/SKA1/SKA3/CENPW	44
CC	GO:0000776	kinetochore	34/460	135/19717	1.07242e-25	1.13408e-23	9.82108e-24	BIRC5/BUB1/BUB1B/CCNB1/CENPA/CENPE/CENPF/CENPI/NEK2/PLK1/TTK/AURKB/KNTC1/NDC80/KIF2C/ZWINT/MTBP/ERCC6L/CENPQ/HJURP/SPC25/CENPK/CENPH/CENPM/CENPO/CENPU/DSN1/CDT1/KIF18A/NUF2/SPC24/SKA1/SKA3/CENPW	34
CC	GO:0000779	condensed chromosome, centromeric region	30/460	118/19717	6.1465e-23	5.19994e-21	4.50312e-21	BIRC5/BUB1/BUB1B/CCNB1/CENPA/CENPE/CENPF/NEK2/PLK1/AURKB/KNTC1/NDC80/KIF2C/ZWINT/ERCC6L/HJURP/SPC25/CENPK/NCAPG/CENPH/CENPM/CENPO/CENPU/DSN1/CDT1/NUF2/SPC24/SKA1/SKA3/CENPW	30
CC	GO:0005819	spindle	47/460	347/19717	1.26252e-22	8.90075e-21	7.708e-21	BIRC5/BUB1B/CCNB1/CDK1/CDC6/CDC20/CDC25B/CENPE/CENPF/ECT2/HSPB1/KIF11/KIFC1/NEK2/PLK1/TTK/CDC7/PRC1/AURKB/KIF23/ESPL1/KNTC1/DLGAP5/KIF14/KIF20A/TACC3/TPX2/KIF4A/RACGAP1/GPSM2/NUSAP1/CDCA8/KIF15/SHCBP1/DSN1/FAM83D/KIF18A/PSRC1/FBF1/KIF18B/CCDC155/CKAP2L/SKA1/SKA3/MAPK15/ASPM/WDR62	47
CC	GO:0000777	condensed chromosome kinetochore	28/460	105/19717	4.14069e-22	2.50216e-20	2.16686e-20	BIRC5/BUB1/BUB1B/CCNB1/CENPA/CENPE/CENPF/NEK2/PLK1/KNTC1/NDC80/KIF2C/ZWINT/ERCC6L/HJURP/SPC25/CENPK/CENPH/CENPM/CENPO/CENPU/DSN1/CDT1/NUF2/SPC24/SKA1/SKA3/CENPW	28
CC	GO:0000778	condensed nuclear chromosome kinetochore	10/460	15/19717	1.17327e-13	5.58732e-12	4.83859e-12	BUB1/BUB1B/CCNB1/CENPA/PLK1/NDC80/CENPK/CENPO/DSN1/NUF2	10
CC	GO:0000794	condensed nuclear chromosome	20/460	99/19717	1.18879e-13	5.58732e-12	4.83859e-12	BRCA2/BUB1/BUB1B/CCNB1/CENPA/CHEK1/NEK2/PLK1/RAD51/AURKB/NDC80/P3H4/DMC1/NCAPH/SMC1B/CENPK/CENPO/DSN1/NUF2/CCDC155	20
CC	GO:0072686	mitotic spindle	20/460	109/19717	8.03937e-13	3.40065e-11	2.94495e-11	CDK1/CENPE/ECT2/KIF11/KIFC1/CDC7/AURKB/KIF23/ESPL1/TACC3/TPX2/RACGAP1/GPSM2/NUSAP1/FAM83D/KIF18A/KIF18B/CKAP2L/SKA1/ASPM	20
CC	GO:0005876	spindle microtubule	15/460	59/19717	4.10378e-12	1.57809e-10	1.36662e-10	BIRC5/CDK1/CENPE/KIF11/PLK1/PRC1/AURKB/KNTC1/KIF4A/NUSAP1/KIF18A/PSRC1/KIF18B/SKA1/SKA3	15
CC	GO:0000922	spindle pole	23/460	164/19717	5.41875e-12	1.81523e-10	1.57198e-10	CCNB1/CDC6/CDC20/CDC25B/CENPF/KIF11/NEK2/PLK1/PRC1/AURKB/KNTC1/DLGAP5/TACC3/TPX2/GPSM2/DSN1/FAM83D/PSRC1/FBF1/CCDC155/CKAP2L/ASPM/WDR62	23
CC	GO:0000780	condensed nuclear chromosome, centromeric region	11/460	26/19717	5.57873e-12	1.81523e-10	1.57198e-10	BUB1/BUB1B/CCNB1/CENPA/PLK1/AURKB/NDC80/CENPK/CENPO/DSN1/NUF2	11
CC	GO:0030496	midbody	22/460	173/19717	1.11687e-10	3.37454e-09	2.92233e-09	BIRC5/CDK1/CENPE/CENPF/ECT2/NEK2/PLK1/PKN1/PRC1/AURKB/KIF23/KIF14/KIF20A/KIF4A/RACGAP1/ANLN/CDCA8/CEP55/SHCBP1/PSRC1/CHMP4C/ASPM	22
CC	GO:0000940	condensed chromosome outer kinetochore	8/460	14/19717	2.19426e-10	6.18782e-09	5.35862e-09	BUB1/BUB1B/CCNB1/CENPF/PLK1/NDC80/SKA1/SKA3	8
CC	GO:0042555	MCM complex	7/460	12/19717	2.57393e-09	6.80483e-08	5.89295e-08	MCM2/MCM3/MCM4/MCM5/MCM6/MCM7/MCM8	7
CC	GO:0005871	kinesin complex	12/460	55/19717	3.98521e-09	9.91615e-08	8.58733e-08	CENPE/KIF11/KIFC1/KIF25/KIF23/KIF14/KIF20A/KIF2C/KIF4A/KIF15/KIF18A/KIF18B	12
CC	GO:0051233	spindle midzone	9/460	34/19717	5.9173e-08	1.39057e-06	1.20422e-06	CDC6/CENPE/PLK1/AURKB/KIF14/RACGAP1/CDCA8/KIF18A/KIF18B	9
CC	GO:0005874	microtubule	29/460	416/19717	1.78529e-07	3.97462e-06	3.442e-06	BIRC5/CDK1/CENPE/KIF11/KIFC1/KIF25/NEK2/PLK1/PRC1/AURKB/KIF23/KNTC1/KIF14/KIF20A/KIF2C/TPX2/KIF4A/RACGAP1/NUSAP1/REEP2/GTSE1/KIF15/KIF18A/PSRC1/KIF18B/SKA1/SKA3/ASPM/GAS2L3	29
CC	GO:0000781	chromosome, telomeric region	17/460	161/19717	2.35859e-07	4.98842e-06	4.31994e-06	BRCA2/CDK1/CHEK1/EZH2/MCM2/MCM3/MCM4/MCM5/MCM6/MCM7/ORC1/PRKDC/RAD51/RECQL4/DMC1/PIF1/CCDC155	17
CC	GO:0005657	replication fork	11/460	70/19717	6.19613e-07	1.24808e-05	1.08083e-05	MCM3/POLA1/PRIM1/RFC4/XRCC2/CDC45/WDHD1/UHRF1/GINS2/MCM10/PIF1	11
CC	GO:0005875	microtubule associated complex	15/460	152/19717	2.83642e-06	5.45366e-05	4.72284e-05	BIRC5/CENPE/KIF11/KIFC1/KIF25/AURKB/KIF23/KIF14/KIF20A/KIF2C/KIF4A/CDCA8/KIF15/KIF18A/KIF18B	15
CC	GO:0045171	intercellular bridge	9/460	59/19717	8.45526e-06	0.000155503	0.000134665	CDC7/KIF23/KIF20A/TPX2/KIF4A/NCAPH2/CDCA8/CEP55/TRIM45	9
CC	GO:0000792	heterochromatin	10/460	78/19717	1.32032e-05	0.000232706	0.000201522	CDKN2A/CENPA/DNMT3A/HELLS/HMGA1/UHRF1/WDR76/CBX2/EME1/ESCO2	10
CC	GO:0032153	cell division site	9/460	68/19717	2.75485e-05	0.000466121	0.000403659	ECT2/PKN1/KIF20A/PLK4/RACGAP1/ANLN/RHOF/CEP55/PLCD3	9
CC	GO:0000784	nuclear chromosome, telomeric region	12/460	125/19717	3.6666e-05	0.000596528	0.00051659	BRCA2/CDK1/MCM2/MCM3/MCM4/MCM5/MCM6/MCM7/ORC1/PRKDC/RAD51/PIF1	12
CC	GO:0043596	nuclear replication fork	7/460	41/19717	4.06714e-05	0.000637186	0.0005518	MCM3/POLA1/PRIM1/CDC45/WDHD1/GINS2/MCM10	7
CC	GO:0000307	cyclin-dependent protein kinase holoenzyme complex	7/460	42/19717	4.78343e-05	0.00072264	0.000625802	CCNA2/CCNB1/CCNE1/CCNF/CDK1/CCNB2/CCNE2	7
CC	GO:0032155	cell division site part	8/460	63/19717	0.000103885	0.00151529	0.00131223	ECT2/PKN1/KIF20A/PLK4/RACGAP1/ANLN/CEP55/PLCD3	8
CC	GO:0000800	lateral element	4/460	13/19717	0.000176864	0.00241334	0.00208994	BRCA2/RAD51/SMC1B/CCDC155	4
CC	GO:1990023	mitotic spindle midzone	4/460	13/19717	0.000176864	0.00241334	0.00208994	CENPE/AURKB/KIF18A/KIF18B	4
CC	GO:0010369	chromocenter	4/460	14/19717	0.000243058	0.00321293	0.00278238	AURKB/OIP5/CDCA8/ESCO2	4
CC	GO:0032154	cleavage furrow	7/460	55/19717	0.000277221	0.00355346	0.00307728	ECT2/PKN1/KIF20A/PLK4/RACGAP1/CEP55/PLCD3	7
CC	GO:0000795	synaptonemal complex	6/460	40/19717	0.000305675	0.0036943	0.00319924	BRCA2/PLK1/RAD51/P3H4/SMC1B/CCDC155	6
CC	GO:0099086	synaptonemal structure	6/460	40/19717	0.000305675	0.0036943	0.00319924	BRCA2/PLK1/RAD51/P3H4/SMC1B/CCDC155	6
CC	GO:0090543	Flemming body	5/460	28/19717	0.000426519	0.0050116	0.00434002	KIF23/KIF14/RACGAP1/CEP55/CHMP4C	5
CC	GO:0000152	nuclear ubiquitin ligase complex	6/460	43/19717	0.0004577	0.00523263	0.00453143	BARD1/BUB1B/CDC20/UBE2C/UBE2S/CBX2	6
CC	GO:0005720	nuclear heterochromatin	5/460	35/19717	0.00123216	0.0137159	0.0118779	CENPA/DNMT3A/UHRF1/EME1/ESCO2	5
CC	GO:0005680	anaphase-promoting complex	4/460	21/19717	0.00127681	0.0138484	0.0119927	BUB1B/CDC20/UBE2C/UBE2S	4
CC	GO:0005814	centriole	10/460	139/19717	0.00158691	0.0167816	0.0145327	CCNF/HSPA1B/PLK1/STIL/TOP2A/PLK4/CEP55/FBF1/MAPK15/WDR62	10
CC	GO:0072687	meiotic spindle	3/460	11/19717	0.0018104	0.018678	0.016175	CCDC155/MAPK15/ASPM	3
CC	GO:0001741	XY body	3/460	13/19717	0.00303091	0.0305256	0.026435	DNMT3A/PLK4/ESCO2	3
CC	GO:0016363	nuclear matrix	8/460	109/19717	0.00402665	0.039611	0.0343029	CENPF/DNMT3A/LMNB1/MYB/POLA1/KIF4A/UHRF1/CENPW	8
CC	GO:0044450	microtubule organizing center part	11/460	185/19717	0.00422209	0.0405896	0.0351504	CCNF/HSPA1B/PLK1/STIL/TOP2A/PLK4/CEP55/CEP72/FBF1/MAPK15/WDR62	11
CC	GO:1902554	serine/threonine protein kinase complex	7/460	88/19717	0.00449861	0.0422869	0.0366203	CCNA2/CCNB1/CCNE1/CCNF/CDK1/CCNB2/CCNE2	7
CC	GO:0045120	pronucleus	3/460	15/19717	0.0046577	0.0428306	0.0370911	CCNA2/CENPF/EZH2	3
CC	GO:0034707	chloride channel complex	5/460	50/19717	0.00604617	0.0544155	0.0471236	CLCN2/CLDN4/GABRD/GABRQ/SLC26A6	5
CC	GO:0005721	pericentric heterochromatin	3/460	20/19717	0.0107056	0.0943427	0.0817003	CENPA/HELLS/ESCO2	3
CC	GO:0000791	euchromatin	4/460	38/19717	0.0115354	0.0995812	0.0862368	DNMT3A/ANKRD2/UHRF1/CBX2	4
CC	GO:0034399	nuclear periphery	8/460	131/19717	0.0118178	0.099979	0.0865813	CENPF/DNMT3A/LMNB1/MYB/POLA1/KIF4A/UHRF1/CENPW	8
MF	GO:0003688	DNA replication origin binding	13/431	24/17697	1.73515e-15	9.94242e-13	9.46114e-13	CDC6/MCM2/MCM3/MCM4/MCM5/MCM6/MCM7/ORC1/POLA1/CDC45/ORC6/MCM10/MCM8	13
MF	GO:0140097	catalytic activity, acting on DNA	30/431	213/17697	7.69383e-15	2.20428e-12	2.09758e-12	DNMT3A/HMGA1/LIG1/MCM2/MCM3/MCM4/MCM5/MCM6/MCM7/POLA1/POLE2/RAD51/RFC4/TOP2A/CDC45/RAD54L/EXO1/RECQL4/GINS1/POLQ/DMC1/GINS2/ERCC6L/NEIL3/DSCC1/PIF1/BRIP1/MCM8/EME1/DQX1	30
MF	GO:0003678	DNA helicase activity	19/431	81/17697	5.6469e-14	1.07856e-11	1.02635e-11	MCM2/MCM3/MCM4/MCM5/MCM6/MCM7/RAD51/RFC4/CDC45/RECQL4/GINS1/POLQ/GINS2/ERCC6L/DSCC1/PIF1/BRIP1/MCM8/DQX1	19
MF	GO:0008094	DNA-dependent ATPase activity	15/431	69/17697	8.41825e-11	1.20591e-08	1.14754e-08	MCM2/MCM5/MCM6/MCM7/MSH5/RAD51/RFC4/TOP2A/XRCC2/RAD54L/POLQ/DMC1/ERCC6L/DSCC1/PIF1	15
MF	GO:0017116	single-stranded DNA-dependent ATP-dependent DNA helicase activity	9/431	20/17697	3.67424e-10	3.5089e-08	3.33905e-08	MCM2/MCM5/MCM6/MCM7/RAD51/RFC4/POLQ/DSCC1/PIF1	9
MF	GO:0043142	single-stranded DNA-dependent ATPase activity	9/431	20/17697	3.67424e-10	3.5089e-08	3.33905e-08	MCM2/MCM5/MCM6/MCM7/RAD51/RFC4/POLQ/DSCC1/PIF1	9
MF	GO:0004386	helicase activity	21/431	163/17697	4.90073e-10	3.60538e-08	3.43086e-08	HELLS/MCM2/MCM3/MCM4/MCM5/MCM6/MCM7/RAD51/RFC4/CDC45/RAD54L/RECQL4/GINS1/POLQ/GINS2/ERCC6L/DSCC1/PIF1/BRIP1/MCM8/DQX1	21
MF	GO:0004003	ATP-dependent DNA helicase activity	9/431	21/17697	6.29212e-10	3.60538e-08	3.43086e-08	MCM2/MCM5/MCM6/MCM7/RAD51/RFC4/POLQ/DSCC1/PIF1	9
MF	GO:0008026	ATP-dependent helicase activity	9/431	21/17697	6.29212e-10	3.60538e-08	3.43086e-08	MCM2/MCM5/MCM6/MCM7/RAD51/RFC4/POLQ/DSCC1/PIF1	9
MF	GO:0070035	purine NTP-dependent helicase activity	9/431	21/17697	6.29212e-10	3.60538e-08	3.43086e-08	MCM2/MCM5/MCM6/MCM7/RAD51/RFC4/POLQ/DSCC1/PIF1	9
MF	GO:0016887	ATPase activity	31/431	384/17697	5.70992e-09	2.97435e-07	2.83037e-07	CENPE/HSPA1B/KIF11/KIFC1/KIF25/MCM2/MCM5/MCM6/MCM7/MSH5/RAD51/RFC4/TOP2A/XRCC2/RAD54L/KIF23/KIF14/KIF20A/POLQ/KIF2C/DMC1/ABCB9/KIF4A/ABCA12/ERCC6L/KIF15/DSCC1/ATAD5/PIF1/KIF18A/KIF18B	31
MF	GO:0043138	3'-5' DNA helicase activity	8/431	20/17697	1.13074e-08	5.3993e-07	5.13794e-07	MCM2/MCM5/MCM6/MCM7/CDC45/RECQL4/GINS1/GINS2	8
MF	GO:0003697	single-stranded DNA binding	16/431	113/17697	1.48243e-08	6.53408e-07	6.21779e-07	BRCA2/MCM2/MCM3/MCM4/MCM5/MCM6/MCM7/POLA1/PRIM1/RAD51/CDC45/RAD51AP1/DMC1/NEIL3/MCM10/MCM8	16
MF	GO:0008017	microtubule binding	23/431	246/17697	3.86692e-08	1.58267e-06	1.50606e-06	BIRC5/CENPE/GLI1/KIF11/KIFC1/KIF25/PLK1/PRC1/KIF23/KIF14/KIF20A/KIF2C/KIF4A/SPEF1/RACGAP1/NUSAP1/KIF15/FAM83D/KIF18A/PSRC1/KIF18B/SKA1/GAS2L3	23
MF	GO:0042623	ATPase activity, coupled	24/431	284/17697	1.33608e-07	5.10382e-06	4.85676e-06	HSPA1B/KIF11/KIF25/MCM2/MCM5/MCM6/MCM7/MSH5/RAD51/RFC4/TOP2A/XRCC2/RAD54L/KIF14/POLQ/DMC1/ABCB9/ABCA12/ERCC6L/DSCC1/ATAD5/PIF1/KIF18A/KIF18B	24
MF	GO:0015631	tubulin binding	25/431	336/17697	8.13341e-07	2.91278e-05	2.77178e-05	BIRC5/BRCA2/CENPE/GLI1/KIF11/KIFC1/KIF25/PLK1/PRC1/KIF23/KIF14/KIF20A/KIF2C/KIF4A/SPEF1/CACYBP/RACGAP1/NUSAP1/KIF15/FAM83D/KIF18A/PSRC1/KIF18B/SKA1/GAS2L3	25
MF	GO:0003777	microtubule motor activity	12/431	84/17697	8.65571e-07	2.91748e-05	2.77626e-05	CENPE/KIF11/KIFC1/KIF25/KIF23/KIF14/KIF20A/KIF2C/KIF4A/KIF15/KIF18A/KIF18B	12
MF	GO:0016538	cyclin-dependent protein serine/threonine kinase regulator activity	8/431	49/17697	2.17935e-05	0.000693761	0.000660178	CCNA2/CCNB1/CCNE1/CCNF/CDKN2A/CDKN2C/CCNB2/CCNE2	8
MF	GO:0035173	histone kinase activity	5/431	17/17697	4.06683e-05	0.00122647	0.0011671	CCNB1/CDK1/CHEK1/PKN1/AURKB	5
MF	GO:0003774	motor activity	12/431	136/17697	0.000124482	0.00356642	0.00339378	CENPE/KIF11/KIFC1/KIF25/KIF23/KIF14/KIF20A/KIF2C/KIF4A/KIF15/KIF18A/KIF18B	12
MF	GO:0005254	chloride channel activity	8/431	75/17697	0.000469878	0.012821	0.0122003	CLCN2/CLDN4/GABRD/FXYD3/BSND/GABRQ/SLC26A6/ANO4	8
MF	GO:0070182	DNA polymerase binding	4/431	19/17697	0.00100573	0.0261948	0.0249268	FANCD2/RAD51/FANCI/CDT1	4
MF	GO:0005253	anion channel activity	8/431	89/17697	0.00146455	0.0364863	0.0347201	CLCN2/CLDN4/GABRD/FXYD3/BSND/GABRQ/SLC26A6/ANO4	8
MF	GO:0015108	chloride transmembrane transporter activity	8/431	100/17697	0.0030635	0.0731411	0.0696006	CLCN2/CLDN4/GABRD/FXYD3/BSND/GABRQ/SLC26A6/ANO4	8
MF	GO:0008574	ATP-dependent microtubule motor activity, plus-end-directed	4/431	26/17697	0.00339109	0.0777238	0.0739615	KIF11/KIF14/KIF18A/KIF18B	4
MF	GO:1990939	ATP-dependent microtubule motor activity	5/431	44/17697	0.00416186	0.091721	0.0872811	KIF11/KIF25/KIF14/KIF18A/KIF18B	5
KEGG	hsa04110	Cell cycle	37/182	124/8076	2.67496e-32	5.85816e-30	5.43439e-30	BUB1/BUB1B/CCNA2/CCNB1/CCNE1/CDK1/CDC6/CDC20/CDC25A/CDC25B/CDC25C/CDKN2A/CDKN2C/CHEK1/E2F1/E2F2/SFN/MCM2/MCM3/MCM4/MCM5/MCM6/MCM7/ORC1/PLK1/PRKDC/RBL1/TTK/CDC7/CDC45/PKMYT1/CCNB2/CCNE2/PTTG1/ESPL1/ORC6/SMC1B	37
KEGG	hsa03030	DNA replication	12/182	36/8076	9.32849e-12	1.02147e-09	9.47578e-10	LIG1/MCM2/MCM3/MCM4/MCM5/MCM6/MCM7/POLA1/POLE2/PRIM1/RFC4/RNASEH2A	12
KEGG	hsa03460	Fanconi anemia pathway	10/182	54/8076	2.67444e-07	1.95234e-05	1.81111e-05	BRCA2/FANCD2/FANCE/FANCB/RAD51/UBE2T/FANCI/BRIP1/RMI2/EME1	10
KEGG	hsa04218	Cellular senescence	16/182	156/8076	3.8703e-07	2.11899e-05	1.9657e-05	CCNA2/CCNB1/CCNE1/CDK1/CDC25A/CDKN2A/CHEK1/E2F1/E2F2/FOXM1/MYBL2/PIK3R2/RBL1/CCNB2/CCNE2/LIN9	16
KEGG	hsa04115	p53 signaling pathway	11/182	73/8076	5.94379e-07	2.60338e-05	2.41506e-05	CCNB1/CCNE1/CDK1/CDKN2A/CHEK1/SFN/RRM2/TP73/CCNB2/CCNE2/GTSE1	11
KEGG	hsa04114	Oocyte meiosis	14/182	129/8076	1.07313e-06	3.91692e-05	3.63358e-05	BUB1/CCNB1/CCNE1/CDK1/CDC20/CDC25C/PLK1/PKMYT1/CCNB2/CCNE2/PTTG1/ESPL1/SMC1B/FBXO43	14
KEGG	hsa04914	Progesterone-mediated oocyte maturation	11/182	100/8076	1.39486e-05	0.000436391	0.000404823	BUB1/CCNA2/CCNB1/CDK1/CDC25A/CDC25B/CDC25C/PIK3R2/PLK1/PKMYT1/CCNB2	11
KEGG	hsa03440	Homologous recombination	7/182	41/8076	3.09353e-05	0.000846853	0.000785593	BARD1/BRCA2/RAD51/XRCC2/RAD54L/BRIP1/EME1	7
KEGG	hsa05166	Human T-cell leukemia virus 1 infection	14/182	219/8076	0.000410809	0.00999635	0.00927323	BUB1B/CCNA2/CCNE1/CDC20/CDKN2A/CDKN2C/CHEK1/E2F1/E2F2/PIK3R2/CCNB2/CCNE2/PTTG1/ESPL1	14
KEGG	hsa05206	MicroRNAs in cancer	17/182	310/8076	0.000602683	0.0131988	0.012244	BAK1/CCNE1/CDC25A/CDC25B/CDC25C/CDKN2A/DNMT3A/E2F1/E2F2/EZH2/FGFR3/MMP16/PIK3R2/CCNE2/KIF23/IGF2BP1/CDCA5	17
KEGG	hsa05222	Small cell lung cancer	8/182	92/8076	0.00105727	0.0210493	0.0195267	BAK1/CCNE1/E2F1/E2F2/FN1/PIK3R2/CCNE2/LAMB4	8
KEGG	hsa05212	Pancreatic cancer	7/182	76/8076	0.0015507	0.0283003	0.0262531	BAK1/BRCA2/CDKN2A/E2F1/E2F2/PIK3R2/RAD51	7

## Sheet: darkorange
ONTOLOGY	ID	Description	GeneRatio	BgRatio	pvalue	p.adjust	qvalue	geneID	Count
BP	GO:0008202	steroid metabolic process	6/26	331/18670	5.06461e-06	0.00271895	0.0017729	CYP2C8/G6PC/INSIG1/LDLR/PPARGC1A/APOA5	6
BP	GO:0042632	cholesterol homeostasis	4/26	96/18670	8.99725e-06	0.00271895	0.0017729	G6PC/INSIG1/LDLR/APOA5	4
BP	GO:0055092	sterol homeostasis	4/26	97/18670	9.37537e-06	0.00271895	0.0017729	G6PC/INSIG1/LDLR/APOA5	4
BP	GO:0006641	triglyceride metabolic process	4/26	105/18670	1.28373e-05	0.00271895	0.0017729	G6PC/INSIG1/LDLR/APOA5	4
BP	GO:0015748	organophosphate ester transport	4/26	105/18670	1.28373e-05	0.00271895	0.0017729	G6PC/LDLR/SLC25A25/APOA5	4
BP	GO:0019218	regulation of steroid metabolic process	4/26	124/18670	2.47457e-05	0.00394385	0.00257161	INSIG1/LDLR/PPARGC1A/APOA5	4
BP	GO:0006639	acylglycerol metabolic process	4/26	129/18670	2.89036e-05	0.00394385	0.00257161	G6PC/INSIG1/LDLR/APOA5	4
BP	GO:0006638	neutral lipid metabolic process	4/26	130/18670	2.9793e-05	0.00394385	0.00257161	G6PC/INSIG1/LDLR/APOA5	4
BP	GO:0015711	organic anion transport	6/26	482/18670	4.25768e-05	0.00500988	0.00326671	G6PC/LDLR/SLC1A1/SLC25A15/SLC25A25/APOA5	6
BP	GO:0031667	response to nutrient levels	6/26	499/18670	5.16519e-05	0.00515203	0.00335941	FOXO1/G6PC/LDLR/PPARGC1A/SIK2/SLC25A25	6
BP	GO:0055088	lipid homeostasis	4/26	151/18670	5.3515e-05	0.00515203	0.00335941	G6PC/INSIG1/LDLR/APOA5	4
BP	GO:0046890	regulation of lipid biosynthetic process	4/26	198/18670	0.000152796	0.0134843	0.00879248	INSIG1/LDLR/PPARGC1A/APOA5	4
BP	GO:0030299	intestinal cholesterol absorption	2/26	15/18670	0.000193641	0.0138711	0.00904471	LDLR/APOA5	2
BP	GO:0046889	positive regulation of lipid biosynthetic process	3/26	84/18670	0.000211975	0.0138711	0.00904471	LDLR/PPARGC1A/APOA5	3
BP	GO:0045722	positive regulation of gluconeogenesis	2/26	16/18670	0.000221115	0.0138711	0.00904471	FOXO1/PPARGC1A	2
BP	GO:0019216	regulation of lipid metabolic process	5/26	410/18670	0.000224028	0.0138711	0.00904471	INSIG1/LDLR/SOCS2/PPARGC1A/APOA5	5
BP	GO:0046486	glycerolipid metabolic process	5/26	414/18670	0.00023434	0.0138711	0.00904471	G6PC/INSIG1/LDLR/SOCS2/APOA5	5
BP	GO:0098856	intestinal lipid absorption	2/26	17/18670	0.000250382	0.0138711	0.00904471	LDLR/APOA5	2
BP	GO:0006094	gluconeogenesis	3/26	89/18670	0.000251478	0.0138711	0.00904471	FOXO1/G6PC/PPARGC1A	3
BP	GO:0019319	hexose biosynthetic process	3/26	92/18670	0.000277318	0.0138711	0.00904471	FOXO1/G6PC/PPARGC1A	3
BP	GO:0030258	lipid modification	4/26	238/18670	0.000308741	0.0138711	0.00904471	CYP2C8/SOCS2/PPARGC1A/APOA5	4
BP	GO:0044241	lipid digestion	2/26	19/18670	0.00031428	0.0138711	0.00904471	LDLR/APOA5	2
BP	GO:1902170	cellular response to reactive nitrogen species	2/26	19/18670	0.00031428	0.0138711	0.00904471	FOXO1/PPARGC1A	2
BP	GO:0019217	regulation of fatty acid metabolic process	3/26	96/18670	0.000314359	0.0138711	0.00904471	INSIG1/PPARGC1A/APOA5	3
BP	GO:0046364	monosaccharide biosynthetic process	3/26	98/18670	0.000334018	0.014149	0.00922594	FOXO1/G6PC/PPARGC1A	3
BP	GO:0062012	regulation of small molecule metabolic process	5/26	459/18670	0.000377115	0.0151122	0.009854	FOXO1/INSIG1/LDLR/PPARGC1A/APOA5	5
BP	GO:0090208	positive regulation of triglyceride metabolic process	2/26	21/18670	0.000385298	0.0151122	0.009854	LDLR/APOA5	2
BP	GO:0002021	response to dietary excess	2/26	27/18670	0.000640697	0.0242321	0.0158007	PPARGC1A/SLC25A25	2
BP	GO:0045940	positive regulation of steroid metabolic process	2/26	30/18670	0.00079199	0.0289213	0.0188583	PPARGC1A/APOA5	2
BP	GO:0007586	digestion	3/26	139/18670	0.000926173	0.0326939	0.0213182	LDLR/PPARGC1A/APOA5	3
BP	GO:0008286	insulin receptor signaling pathway	3/26	141/18670	0.000965247	0.0328341	0.0214097	FOXO1/SOCS2/SIK2	3
BP	GO:0097009	energy homeostasis	2/26	34/18670	0.0010179	0.0328341	0.0214097	FOXO1/PPARGC1A	2
BP	GO:0035264	multicellular organism growth	3/26	146/18670	0.00106748	0.0328341	0.0214097	G6PC/SOCS2/SLC25A25	3
BP	GO:0045834	positive regulation of lipid metabolic process	3/26	146/18670	0.00106748	0.0328341	0.0214097	LDLR/PPARGC1A/APOA5	3
BP	GO:0008203	cholesterol metabolic process	3/26	150/18670	0.00115402	0.0328341	0.0214097	INSIG1/LDLR/APOA5	3
BP	GO:0045923	positive regulation of fatty acid metabolic process	2/26	37/18670	0.00120532	0.0328341	0.0214097	PPARGC1A/APOA5	2
BP	GO:0072330	monocarboxylic acid biosynthetic process	4/26	343/18670	0.00121558	0.0328341	0.0214097	CYP2C8/INSIG1/PPARGC1A/APOA5	4
BP	GO:0062013	positive regulation of small molecule metabolic process	3/26	153/18670	0.00122176	0.0328341	0.0214097	FOXO1/PPARGC1A/APOA5	3
BP	GO:1902652	secondary alcohol metabolic process	3/26	155/18670	0.00126828	0.0328341	0.0214097	INSIG1/LDLR/APOA5	3
BP	GO:0032094	response to food	2/26	38/18670	0.0012712	0.0328341	0.0214097	G6PC/SLC25A25	2
BP	GO:0050892	intestinal absorption	2/26	38/18670	0.0012712	0.0328341	0.0214097	LDLR/APOA5	2
BP	GO:0090207	regulation of triglyceride metabolic process	2/26	40/18670	0.00140802	0.0355023	0.0231494	LDLR/APOA5	2
BP	GO:0031331	positive regulation of cellular catabolic process	4/26	361/18670	0.0014677	0.0357202	0.0232915	FOXO1/LDLR/TOB1/APOA5	4
BP	GO:0006633	fatty acid biosynthetic process	3/26	164/18670	0.00149148	0.0357202	0.0232915	CYP2C8/INSIG1/APOA5	3
BP	GO:0016125	sterol metabolic process	3/26	166/18670	0.00154421	0.0357202	0.0232915	INSIG1/LDLR/APOA5	3
BP	GO:0010907	positive regulation of glucose metabolic process	2/26	42/18670	0.00155158	0.0357202	0.0232915	FOXO1/PPARGC1A	2
BP	GO:0051602	response to electrical stimulus	2/26	43/18670	0.00162588	0.035871	0.0233899	AKAP12/PPARGC1A	2
BP	GO:0060612	adipose tissue development	2/26	43/18670	0.00162588	0.035871	0.0233899	PPARGC1A/SLC25A25	2
BP	GO:0001659	temperature homeostasis	3/26	173/18670	0.00173796	0.0375612	0.024492	FOXO1/PPARGC1A/GADD45G	3
BP	GO:0006631	fatty acid metabolic process	4/26	383/18670	0.00182304	0.0386121	0.0251772	CYP2C8/INSIG1/PPARGC1A/APOA5	4
BP	GO:0071466	cellular response to xenobiotic stimulus	3/26	180/18670	0.00194632	0.0402685	0.0262573	CYP2C8/FOXO1/PPARGC1A	3
BP	GO:0010565	regulation of cellular ketone metabolic process	3/26	181/18670	0.0019773	0.0402685	0.0262573	INSIG1/PPARGC1A/APOA5	3
BP	GO:0006111	regulation of gluconeogenesis	2/26	48/18670	0.00202234	0.0404086	0.0263486	FOXO1/PPARGC1A	2
BP	GO:0009409	response to cold	2/26	50/18670	0.00219249	0.0429972	0.0280365	FOXO1/PPARGC1A	2
BP	GO:0045599	negative regulation of fat cell differentiation	2/26	51/18670	0.00228003	0.0435738	0.0284125	FOXO1/INSIG1	2
BP	GO:0042594	response to starvation	3/26	191/18670	0.00230418	0.0435738	0.0284125	FOXO1/PPARGC1A/SIK2	3
BP	GO:1902475	L-alpha-amino acid transmembrane transport	2/26	53/18670	0.00246001	0.045272	0.0295198	SLC1A1/SLC25A15	2
BP	GO:0006694	steroid biosynthetic process	3/26	196/18670	0.00247948	0.045272	0.0295198	INSIG1/PPARGC1A/APOA5	3
BP	GO:0050994	regulation of lipid catabolic process	2/26	54/18670	0.00255245	0.0458143	0.0298734	LDLR/APOA5	2
BP	GO:0009896	positive regulation of catabolic process	4/26	423/18670	0.00261581	0.0459451	0.0299587	FOXO1/LDLR/TOB1/APOA5	4
BP	GO:0042304	regulation of fatty acid biosynthetic process	2/26	55/18670	0.00264651	0.0459451	0.0299587	INSIG1/APOA5	2
BP	GO:0014888	striated muscle adaptation	2/26	57/18670	0.00283947	0.0477301	0.0311227	FOXO1/PPARGC1A	2
BP	GO:0071398	cellular response to fatty acid	2/26	57/18670	0.00283947	0.0477301	0.0311227	LDLR/PPARGC1A	2
BP	GO:0006006	glucose metabolic process	3/26	209/18670	0.00297338	0.0492002	0.0320812	FOXO1/G6PC/PPARGC1A	3
BP	GO:0015893	drug transport	3/26	214/18670	0.00317835	0.0509981	0.0332535	SLC1A1/SLC25A15/SLC25A25	3
BP	GO:0016051	carbohydrate biosynthetic process	3/26	214/18670	0.00317835	0.0509981	0.0332535	FOXO1/G6PC/PPARGC1A	3
BP	GO:0032869	cellular response to insulin stimulus	3/26	216/18670	0.00326271	0.0515703	0.0336267	FOXO1/SOCS2/SIK2	3
BP	GO:0010676	positive regulation of cellular carbohydrate metabolic process	2/26	62/18670	0.00334997	0.0521709	0.0340183	FOXO1/PPARGC1A	2
BP	GO:0046503	glycerolipid catabolic process	2/26	64/18670	0.00356532	0.0532431	0.0347174	LDLR/APOA5	2
BP	GO:0045444	fat cell differentiation	3/26	223/18670	0.00356883	0.0532431	0.0347174	FOXO1/INSIG1/PPARGC1A	3
BP	GO:0046394	carboxylic acid biosynthetic process	4/26	462/18670	0.00359204	0.0532431	0.0347174	CYP2C8/INSIG1/PPARGC1A/APOA5	4
BP	GO:0016053	organic acid biosynthetic process	4/26	463/18670	0.00361993	0.0532431	0.0347174	CYP2C8/INSIG1/PPARGC1A/APOA5	4
BP	GO:0014823	response to activity	2/26	65/18670	0.00367536	0.053318	0.0347662	PPARGC1A/SLC25A25	2
BP	GO:0046626	regulation of insulin receptor signaling pathway	2/26	66/18670	0.00378698	0.0541948	0.035338	SOCS2/SIK2	2
BP	GO:0015807	L-amino acid transport	2/26	67/18670	0.00390018	0.0550705	0.035909	SLC1A1/SLC25A15	2
BP	GO:0042593	glucose homeostasis	3/26	241/18670	0.00443516	0.0607269	0.0395973	FOXO1/G6PC/PPARGC1A	3
BP	GO:0033500	carbohydrate homeostasis	3/26	242/18670	0.0044867	0.0607269	0.0395973	FOXO1/G6PC/PPARGC1A	3
BP	GO:0060193	positive regulation of lipase activity	2/26	72/18670	0.00448955	0.0607269	0.0395973	BDNF/APOA5	2
BP	GO:1900076	regulation of cellular response to insulin stimulus	2/26	74/18670	0.00473615	0.0607269	0.0395973	SOCS2/SIK2	2
BP	GO:0042180	cellular ketone metabolic process	3/26	248/18670	0.00480365	0.0607269	0.0395973	INSIG1/PPARGC1A/APOA5	3
BP	GO:0046434	organophosphate catabolic process	3/26	248/18670	0.00480365	0.0607269	0.0395973	LDLR/PPARGC1A/PDE7B	3
BP	GO:0019318	hexose metabolic process	3/26	249/18670	0.00485776	0.0607269	0.0395973	FOXO1/G6PC/PPARGC1A	3
BP	GO:0006695	cholesterol biosynthetic process	2/26	75/18670	0.00486176	0.0607269	0.0395973	INSIG1/APOA5	2
BP	GO:0015914	phospholipid transport	2/26	75/18670	0.00486176	0.0607269	0.0395973	LDLR/APOA5	2
BP	GO:0071383	cellular response to steroid hormone stimulus	3/26	250/18670	0.00491224	0.0607269	0.0395973	FOXO1/NR3C2/PPARGC1A	3
BP	GO:1901264	carbohydrate derivative transport	2/26	76/18670	0.0049889	0.0607269	0.0395973	G6PC/SLC25A25	2
BP	GO:1902653	secondary alcohol biosynthetic process	2/26	76/18670	0.0049889	0.0607269	0.0395973	INSIG1/APOA5	2
BP	GO:0016126	sterol biosynthetic process	2/26	81/18670	0.00564745	0.067962	0.0443149	INSIG1/APOA5	2
BP	GO:0006855	drug transmembrane transport	2/26	82/18670	0.0057837	0.0688196	0.0448742	SLC1A1/SLC25A15	2
BP	GO:0045913	positive regulation of carbohydrate metabolic process	2/26	83/18670	0.00592146	0.0689102	0.0449332	FOXO1/PPARGC1A	2
BP	GO:0046470	phosphatidylcholine metabolic process	2/26	83/18670	0.00592146	0.0689102	0.0449332	LDLR/APOA5	2
BP	GO:0032868	response to insulin	3/26	272/18670	0.00620593	0.0714356	0.04658	FOXO1/SOCS2/SIK2	3
BP	GO:0003333	amino acid transmembrane transport	2/26	86/18670	0.00634371	0.071468	0.0466011	SLC1A1/SLC25A15	2
BP	GO:0070542	response to fatty acid	2/26	86/18670	0.00634371	0.071468	0.0466011	LDLR/PPARGC1A	2
BP	GO:1903725	regulation of phospholipid metabolic process	2/26	88/18670	0.00663266	0.0739367	0.0482108	LDLR/SOCS2	2
BP	GO:0015980	energy derivation by oxidation of organic compounds	3/26	285/18670	0.00705775	0.0777984	0.0507289	G6PC/PPARGC1A/SLC25A25	3
BP	GO:0044262	cellular carbohydrate metabolic process	3/26	286/18670	0.00712601	0.0777984	0.0507289	FOXO1/G6PC/PPARGC1A	3
BP	GO:0005996	monosaccharide metabolic process	3/26	292/18670	0.00754393	0.0806971	0.052619	FOXO1/G6PC/PPARGC1A	3
BP	GO:0009410	response to xenobiotic stimulus	3/26	292/18670	0.00754393	0.0806971	0.052619	CYP2C8/FOXO1/PPARGC1A	3
BP	GO:0050810	regulation of steroid biosynthetic process	2/26	95/18670	0.00769035	0.0814408	0.0531039	INSIG1/PPARGC1A	2
BP	GO:0043255	regulation of carbohydrate biosynthetic process	2/26	97/18670	0.00800567	0.0831177	0.0541973	FOXO1/PPARGC1A	2
BP	GO:0120162	positive regulation of cold-induced thermogenesis	2/26	97/18670	0.00800567	0.0831177	0.0541973	PPARGC1A/GADD45G	2
BP	GO:0060191	regulation of lipase activity	2/26	98/18670	0.0081655	0.083954	0.0547426	BDNF/APOA5	2
BP	GO:0022600	digestive system process	2/26	100/18670	0.00848946	0.0856223	0.0558304	LDLR/APOA5	2
BP	GO:0030301	cholesterol transport	2/26	100/18670	0.00848946	0.0856223	0.0558304	LDLR/APOA5	2
BP	GO:0097006	regulation of plasma lipoprotein particle levels	2/26	101/18670	0.00865359	0.0864543	0.056373	LDLR/APOA5	2
BP	GO:0006650	glycerophospholipid metabolic process	3/26	319/18670	0.00960357	0.0939324	0.0612491	LDLR/SOCS2/APOA5	3
BP	GO:0043502	regulation of muscle adaptation	2/26	107/18670	0.00966821	0.0939324	0.0612491	FOXO1/PPARGC1A	2
BP	GO:0062014	negative regulation of small molecule metabolic process	2/26	107/18670	0.00966821	0.0939324	0.0612491	INSIG1/PPARGC1A	2
BP	GO:0071375	cellular response to peptide hormone stimulus	3/26	321/18670	0.00976796	0.0940388	0.0613185	FOXO1/SOCS2/SIK2	3
CC	GO:0034358	plasma lipoprotein particle	2/27	37/19717	0.00116765	0.0293975	0.0222984	LDLR/APOA5	2
CC	GO:1990777	lipoprotein particle	2/27	37/19717	0.00116765	0.0293975	0.0222984	LDLR/APOA5	2
CC	GO:0032994	protein-lipid complex	2/27	39/19717	0.00129695	0.0293975	0.0222984	LDLR/APOA5	2
MF	GO:0015238	drug transmembrane transporter activity	3/27	92/17697	0.000363306	0.0566757	0.0336536	SLC1A1/SLC25A15/SLC25A25	3
MF	GO:0051427	hormone receptor binding	3/27	185/17697	0.00273318	0.0949532	0.0563825	ETS2/SOCS2/PPARGC1A	3
MF	GO:0005070	SH3/SH2 adaptor activity	2/27	52/17697	0.00283584	0.0949532	0.0563825	SOCS2/TOB1	2
MF	GO:0015179	L-amino acid transmembrane transporter activity	2/27	54/17697	0.00305466	0.0949532	0.0563825	SLC1A1/SLC25A15	2
MF	GO:0008514	organic anion transmembrane transporter activity	3/27	211/17697	0.00395767	0.0949532	0.0563825	SLC1A1/SLC25A15/SLC25A25	3
MF	GO:0015171	amino acid transmembrane transporter activity	2/27	74/17697	0.0056585	0.0949532	0.0563825	SLC1A1/SLC25A15	2
MF	GO:0035591	signaling adaptor activity	2/27	80/17697	0.00658297	0.0949532	0.0563825	SOCS2/TOB1	2
MF	GO:0035258	steroid hormone receptor binding	2/27	92/17697	0.00862293	0.0949532	0.0563825	ETS2/PPARGC1A	2
MF	GO:0005496	steroid binding	2/27	95/17697	0.00917188	0.0949532	0.0563825	NR3C2/APOA5	2
MF	GO:0008509	anion transmembrane transporter activity	3/27	327/17697	0.0131681	0.0949532	0.0563825	SLC1A1/SLC25A15/SLC25A25	3
MF	GO:0005347	ATP transmembrane transporter activity	1/27	10/17697	0.0151563	0.0949532	0.0563825	SLC25A25	1
MF	GO:0016595	glutamate binding	1/27	10/17697	0.0151563	0.0949532	0.0563825	SLC1A1	1
MF	GO:0019203	carbohydrate phosphatase activity	1/27	10/17697	0.0151563	0.0949532	0.0563825	G6PC	1
MF	GO:0050308	sugar-phosphatase activity	1/27	10/17697	0.0151563	0.0949532	0.0563825	G6PC	1
MF	GO:0004115	3',5'-cyclic-AMP phosphodiesterase activity	1/27	12/17697	0.0181609	0.0949532	0.0563825	PDE7B	1
MF	GO:0005041	low-density lipoprotein particle receptor activity	1/27	12/17697	0.0181609	0.0949532	0.0563825	LDLR	1
MF	GO:0042301	phosphate ion binding	1/27	12/17697	0.0181609	0.0949532	0.0563825	G6PC	1
MF	GO:0042975	peroxisome proliferator activated receptor binding	1/27	12/17697	0.0181609	0.0949532	0.0563825	PPARGC1A	1
MF	GO:0008179	adenylate cyclase binding	1/27	13/17697	0.0196599	0.0949532	0.0563825	AKAP12	1
MF	GO:0016725	oxidoreductase activity, acting on CH or CH2 groups	1/27	13/17697	0.0196599	0.0949532	0.0563825	CYP2C8	1
MF	GO:0000295	adenine nucleotide transmembrane transporter activity	1/27	14/17697	0.0211567	0.0949532	0.0563825	SLC25A25	1
MF	GO:0005283	amino acid:sodium symporter activity	1/27	14/17697	0.0211567	0.0949532	0.0563825	SLC1A1	1
MF	GO:0005313	L-glutamate transmembrane transporter activity	1/27	14/17697	0.0211567	0.0949532	0.0563825	SLC1A1	1
MF	GO:0005346	purine ribonucleotide transmembrane transporter activity	1/27	14/17697	0.0211567	0.0949532	0.0563825	SLC25A25	1
MF	GO:0015172	acidic amino acid transmembrane transporter activity	1/27	14/17697	0.0211567	0.0949532	0.0563825	SLC1A1	1
MF	GO:0046935	1-phosphatidylinositol-3-kinase regulator activity	1/27	14/17697	0.0211567	0.0949532	0.0563825	SOCS2	1
MF	GO:0060229	lipase activator activity	1/27	14/17697	0.0211567	0.0949532	0.0563825	APOA5	1
MF	GO:0035257	nuclear hormone receptor binding	2/27	152/17697	0.0223522	0.0949532	0.0563825	ETS2/PPARGC1A	2
MF	GO:0005342	organic acid transmembrane transporter activity	2/27	153/17697	0.0226272	0.0949532	0.0563825	SLC1A1/SLC25A15	2
MF	GO:0046943	carboxylic acid transmembrane transporter activity	2/27	153/17697	0.0226272	0.0949532	0.0563825	SLC1A1/SLC25A15	2
MF	GO:0001846	opsonin binding	1/27	15/17697	0.0226513	0.0949532	0.0563825	C4A	1
MF	GO:0015216	purine nucleotide transmembrane transporter activity	1/27	15/17697	0.0226513	0.0949532	0.0563825	SLC25A25	1
MF	GO:0030228	lipoprotein particle receptor activity	1/27	15/17697	0.0226513	0.0949532	0.0563825	LDLR	1
MF	GO:0005159	insulin-like growth factor receptor binding	1/27	16/17697	0.0241437	0.0949532	0.0563825	SOCS2	1
MF	GO:0008392	arachidonic acid epoxygenase activity	1/27	16/17697	0.0241437	0.0949532	0.0563825	CYP2C8	1
MF	GO:0030169	low-density lipoprotein particle binding	1/27	16/17697	0.0241437	0.0949532	0.0563825	LDLR	1
MF	GO:0035259	glucocorticoid receptor binding	1/27	16/17697	0.0241437	0.0949532	0.0563825	ETS2	1
MF	GO:0008391	arachidonic acid monooxygenase activity	1/27	17/17697	0.0256339	0.0949532	0.0563825	CYP2C8	1
MF	GO:0035014	phosphatidylinositol 3-kinase regulator activity	1/27	17/17697	0.0256339	0.0949532	0.0563825	SOCS2	1
MF	GO:0005416	amino acid:cation symporter activity	1/27	18/17697	0.0271219	0.0949532	0.0563825	SLC1A1	1
MF	GO:0017127	cholesterol transporter activity	1/27	18/17697	0.0271219	0.0949532	0.0563825	APOA5	1
MF	GO:0120020	intermembrane cholesterol transfer activity	1/27	18/17697	0.0271219	0.0949532	0.0563825	APOA5	1
MF	GO:0008201	heparin binding	2/27	169/17697	0.0272161	0.0949532	0.0563825	EVA1C/APOA5	2
MF	GO:0030674	protein binding, bridging	2/27	170/17697	0.0275145	0.0949532	0.0563825	SOCS2/TOB1	2
MF	GO:0004550	nucleoside diphosphate kinase activity	1/27	19/17697	0.0286077	0.0949532	0.0563825	AK7	1
MF	GO:0015215	nucleotide transmembrane transporter activity	1/27	19/17697	0.0286077	0.0949532	0.0563825	SLC25A25	1
MF	GO:0120015	intermembrane sterol transfer activity	1/27	19/17697	0.0286077	0.0949532	0.0563825	APOA5	1
MF	GO:0016922	nuclear receptor binding	1/27	20/17697	0.0300913	0.0977968	0.058071	PPARGC1A	1
MF	GO:0001848	complement binding	1/27	21/17697	0.0315728	0.0985071	0.0584927	C4A	1
MF	GO:0050750	low-density lipoprotein particle receptor binding	1/27	21/17697	0.0315728	0.0985071	0.0584927	APOA5	1
KEGG	hsa04922	Glucagon signaling pathway	4/18	107/8076	7.72539e-05	0.00633482	0.00585504	FOXO1/G6PC/PPARGC1A/SIK2	4
KEGG	hsa04910	Insulin signaling pathway	4/18	137/8076	0.000201615	0.00826622	0.00764015	FOXO1/G6PC/SOCS2/PPARGC1A	4
KEGG	hsa04931	Insulin resistance	3/18	108/8076	0.00163973	0.0448192	0.0414247	FOXO1/G6PC/PPARGC1A	3
KEGG	hsa04152	AMPK signaling pathway	3/18	120/8076	0.00221819	0.0454729	0.0420288	FOXO1/G6PC/PPARGC1A	3
KEGG	hsa04068	FoxO signaling pathway	3/18	131/8076	0.00284793	0.046706	0.0431686	FOXO1/G6PC/GADD45G	3

## Sheet: darkgreen
ONTOLOGY	ID	Description	GeneRatio	BgRatio	pvalue	p.adjust	qvalue	geneID	Count
MF	GO:0017046	peptide hormone binding	3/55	49/17697	0.000472946	0.0448552	0.03735	CRHBP/GHR/VIPR1	3
MF	GO:0016616	oxidoreductase activity, acting on the CH-OH group of donors, NAD or NADP as acceptor	4/55	119/17697	0.000508725	0.0448552	0.03735	ADH1A/BDH2/CBR4/CYP4A22	4
MF	GO:0016614	oxidoreductase activity, acting on CH-OH group of donors	4/55	128/17697	0.000669481	0.0448552	0.03735	ADH1A/BDH2/CBR4/CYP4A22	4
MF	GO:0016705	oxidoreductase activity, acting on paired donors, with incorporation or reduction of molecular oxygen	4/55	159/17697	0.00149856	0.063019	0.0524746	CYP4A11/P3H2/KDM8/CYP4A22	4
MF	GO:0016722	oxidoreductase activity, oxidizing metal ions	2/55	19/17697	0.00156764	0.063019	0.0524746	STEAP3/STEAP4	2
MF	GO:0050662	coenzyme binding	5/55	291/17697	0.00206416	0.0691494	0.0575793	ALB/P3H2/BDH2/STEAP4/CBR4	5
MF	GO:0051213	dioxygenase activity	3/55	91/17697	0.00284436	0.0816738	0.068008	P3H2/KDM8/BCO2	3
MF	GO:0042562	hormone binding	3/55	102/17697	0.0039246	0.0986057	0.0821069	CRHBP/GHR/VIPR1	3
KEGG	hsa00071	Fatty acid degradation	3/27	44/8076	0.000402869	0.023347	0.021065	ADH1A/CYP4A11/CYP4A22	3
KEGG	hsa00072	Synthesis and degradation of ketone bodies	2/27	10/8076	0.00047647	0.023347	0.021065	HMGCLL1/BDH2	2
KEGG	hsa00830	Retinol metabolism	3/27	68/8076	0.00144518	0.0472091	0.0425947	ADH1A/CYP4A11/CYP4A22	3
KEGG	hsa00650	Butanoate metabolism	2/27	28/8076	0.00385661	0.094487	0.0852515	HMGCLL1/BDH2	2

## Sheet: red
ONTOLOGY	ID	Description	GeneRatio	BgRatio	pvalue	p.adjust	qvalue	geneID	Count
BP	GO:0015711	organic anion transport	30/291	482/18670	1.22452e-10	4.01643e-07	3.59751e-07	ABAT/AGXT/APBA1/AVPR1A/ACSL1/ABCB4/SCP2/SLC6A1/SLC7A2/SLC10A1/SLCO2A1/THRSP/ABCB11/SLC17A4/ABCC4/ABCA7/ATP8A1/SLC22A7/GLS2/SLC2A8/PRKAG2/SLC38A4/SLC2A9/PITPNM2/ABCG8/SLC22A9/SLC16A14/SLC25A41/SLC22A25/SLC22A10	30
BP	GO:0044282	small molecule catabolic process	25/291	445/18670	3.55445e-08	4.17853e-05	3.74271e-05	ABAT/ACADL/ADH4/AGXT/ALDOB/CBS/CDA/DAO/DPYS/GCK/HDC/IVD/PON1/SCP2/AKR1D1/SULT1E1/TAT/ACAA2/MTHFS/HAAO/GLS2/AADAT/HAO2/UROC1/UPP2	25
BP	GO:0006631	fatty acid metabolic process	23/291	383/18670	3.82183e-08	4.17853e-05	3.74271e-05	ACADL/ALOX15/AVPR1A/CYP2A6/CYP2A7/CYP2A13/CYP2C18/ACSL1/HPGD/IVD/PON1/SCP2/LIPG/ACAA2/ACSBG1/HAO2/PRKAG2/ELOVL6/ACSM2A/ACOT12/GPAT2/CYP4V2/ACSM2B	23
BP	GO:0006869	lipid transport	22/291	365/18670	7.15266e-08	5.86519e-05	5.25344e-05	ACSL1/ABCB4/PON1/RBP4/SCP2/SLC10A1/SLCO2A1/THRSP/FZD4/ABCB11/SYT7/LIPG/ABCC4/ABCA7/ABCA9/ATP8A1/ABCA6/PRKAG2/PITPNM2/ABCG5/ABCG8/SLC22A9	22
BP	GO:0001676	long-chain fatty acid metabolic process	12/291	109/18670	1.33757e-07	8.77447e-05	7.85929e-05	ACADL/ALOX15/CYP2A6/CYP2A7/CYP2A13/CYP2C18/ACSL1/HPGD/SCP2/ACSBG1/ELOVL6/ACOT12	12
BP	GO:0008202	steroid metabolic process	20/291	331/18670	2.74771e-07	0.000103816	9.2988e-05	ACADL/STS/CYP2A6/ESR1/HMGCS2/HSD3B1/HSD3B2/PON1/SCP2/SRD5A1/AKR1D1/SULT1E1/UGT2B15/RDH16/ABCB11/ACAA2/FAXDC2/PRKAG2/ELOVL6/CYP4V2	20
BP	GO:0046394	carboxylic acid biosynthetic process	24/291	462/18670	2.85866e-07	0.000103816	9.2988e-05	ABAT/ACADL/AGXT/ALDOB/ALOX15/AVPR1A/CBS/GCK/GPD1/HPGD/PFKFB1/SCP2/AKR1D1/ABCB11/ALDH1A2/LIPG/MTHFS/HAAO/GLS2/PRKAG2/ELOVL6/ACSM2A/ACOT12/ACSM2B	24
BP	GO:0016053	organic acid biosynthetic process	24/291	463/18670	2.9731e-07	0.000103816	9.2988e-05	ABAT/ACADL/AGXT/ALDOB/ALOX15/AVPR1A/CBS/GCK/GPD1/HPGD/PFKFB1/SCP2/AKR1D1/ABCB11/ALDH1A2/LIPG/MTHFS/HAAO/GLS2/PRKAG2/ELOVL6/ACSM2A/ACOT12/ACSM2B	24
BP	GO:0016054	organic acid catabolic process	18/291	275/18670	3.42713e-07	0.000103816	9.2988e-05	ABAT/ACADL/AGXT/CBS/DAO/HDC/IVD/PON1/SCP2/AKR1D1/TAT/ACAA2/MTHFS/HAAO/GLS2/AADAT/HAO2/UROC1	18
BP	GO:0046395	carboxylic acid catabolic process	18/291	275/18670	3.42713e-07	0.000103816	9.2988e-05	ABAT/ACADL/AGXT/CBS/DAO/HDC/IVD/PON1/SCP2/AKR1D1/TAT/ACAA2/MTHFS/HAAO/GLS2/AADAT/HAO2/UROC1	18
BP	GO:0010876	lipid localization	22/291	400/18670	3.48164e-07	0.000103816	9.2988e-05	ACSL1/ABCB4/PON1/RBP4/SCP2/SLC10A1/SLCO2A1/THRSP/FZD4/ABCB11/SYT7/LIPG/ABCC4/ABCA7/ABCA9/ATP8A1/ABCA6/PRKAG2/PITPNM2/ABCG5/ABCG8/SLC22A9	22
BP	GO:0072330	monocarboxylic acid biosynthetic process	20/291	343/18670	4.83595e-07	0.000132183	0.000118396	ABAT/ACADL/AGXT/ALDOB/ALOX15/AVPR1A/GCK/GPD1/HPGD/PFKFB1/SCP2/AKR1D1/ABCB11/ALDH1A2/LIPG/PRKAG2/ELOVL6/ACSM2A/ACOT12/ACSM2B	20
BP	GO:0034754	cellular hormone metabolic process	12/291	129/18670	8.46697e-07	0.000213628	0.000191347	ADH4/CYP2C18/ESR1/HSD3B1/HSD3B2/RBP4/SRD5A1/AKR1D1/SULT1E1/RDH16/ALDH1A2/CYP27C1	12
BP	GO:0015849	organic acid transport	19/291	333/18670	1.30012e-06	0.000284292	0.00025464	ABAT/AGXT/APBA1/AVPR1A/ACSL1/ABCB4/SLC6A1/SLC7A2/SLC10A1/SLCO2A1/THRSP/ABCB11/SLC17A4/ABCC4/GLS2/PRKAG2/SLC38A4/SLC22A9/SLC16A14	19
BP	GO:0046942	carboxylic acid transport	19/291	333/18670	1.30012e-06	0.000284292	0.00025464	ABAT/AGXT/APBA1/AVPR1A/ACSL1/ABCB4/SLC6A1/SLC7A2/SLC10A1/SLCO2A1/THRSP/ABCB11/SLC17A4/ABCC4/GLS2/PRKAG2/SLC38A4/SLC22A9/SLC16A14	19
BP	GO:0015718	monocarboxylic acid transport	13/291	162/18670	1.60142e-06	0.000328292	0.000294051	ABAT/APBA1/ACSL1/ABCB4/SLC6A1/SLC10A1/SLCO2A1/THRSP/ABCB11/ABCC4/PRKAG2/SLC22A9/SLC16A14	13
BP	GO:0042737	drug catabolic process	12/291	140/18670	2.02616e-06	0.00039093	0.000350155	CYP2A6/CYP2A7/CYP2A13/CYP2C18/DAO/DPYS/HBG2/SULT1E1/TAT/EPX/MTHFS/AADAT	12
BP	GO:1901568	fatty acid derivative metabolic process	13/291	167/18670	2.25226e-06	0.000410413	0.000367607	ALOX15/AVPR1A/CYP2A6/CYP2A7/CYP2A13/CYP2C18/ACSL1/HMGCS2/HPGD/PON1/ACSBG1/ELOVL6/ACSM2A	13
BP	GO:0006721	terpenoid metabolic process	11/291	120/18670	2.81474e-06	0.000485914	0.000435233	ADH4/CYP2C18/EGFR/HMGCS2/RBP4/SDC4/SRD5A1/RDH16/ALDH1A2/CYP4V2/CYP27C1	11
BP	GO:0009063	cellular amino acid catabolic process	11/291	125/18670	4.19787e-06	0.00068845	0.000616645	ABAT/AGXT/CBS/DAO/HDC/IVD/TAT/HAAO/GLS2/AADAT/UROC1	11
BP	GO:1901606	alpha-amino acid catabolic process	10/291	106/18670	6.18215e-06	0.000965592	0.000864881	AGXT/CBS/DAO/HDC/IVD/TAT/HAAO/GLS2/AADAT/UROC1	10
BP	GO:0016101	diterpenoid metabolic process	10/291	110/18670	8.61735e-06	0.00122891	0.00110073	ADH4/CYP2C18/EGFR/RBP4/SDC4/SRD5A1/RDH16/ALDH1A2/CYP4V2/CYP27C1	10
BP	GO:0033559	unsaturated fatty acid metabolic process	10/291	110/18670	8.61735e-06	0.00122891	0.00110073	ALOX15/AVPR1A/CYP2A6/CYP2A7/CYP2A13/CYP2C18/ACSL1/HPGD/SCP2/ELOVL6	10
BP	GO:1901605	alpha-amino acid metabolic process	14/291	222/18670	1.07547e-05	0.00146981	0.00131651	AGXT/ART4/CBS/CKMT2/DAO/HDC/IVD/TAT/MTHFS/HAAO/GLS2/AADAT/UROC1/IYD	14
BP	GO:0006720	isoprenoid metabolic process	11/291	139/18670	1.16661e-05	0.00153059	0.00137095	ADH4/CYP2C18/EGFR/HMGCS2/RBP4/SDC4/SRD5A1/RDH16/ALDH1A2/CYP4V2/CYP27C1	11
BP	GO:0042445	hormone metabolic process	14/291	232/18670	1.76691e-05	0.00222903	0.00199654	ADH4/CYP2C18/ESR1/HSD3B1/HSD3B2/RBP4/SRD5A1/AKR1D1/SULT1E1/RDH16/ALDH1A2/CHST9/CYP27C1/IYD	14
BP	GO:0051384	response to glucocorticoid	11/291	146/18670	1.85589e-05	0.00225456	0.00201941	AGXT/AVPR1A/EGFR/FLT3/GJB2/HSD3B1/HSD3B2/PFKFB1/SRD5A1/TAT/ACSBG1	11
BP	GO:0006732	coenzyme metabolic process	19/291	403/18670	2.01161e-05	0.00235646	0.00211068	ALDOB/ACSL1/GCK/GPD1/HMGCS2/MOCS1/PFKFB1/NAMPT/MTHFS/ACSBG1/HAAO/AADAT/PRKAG2/PANK1/ELOVL6/ACSM2A/ACOT12/PPTC7/ACSM2B	19
BP	GO:0032373	positive regulation of sterol transport	5/291	23/18670	2.37557e-05	0.00259729	0.00232639	ABCB4/PON1/SCP2/LIPG/ABCA7	5
BP	GO:0032376	positive regulation of cholesterol transport	5/291	23/18670	2.37557e-05	0.00259729	0.00232639	ABCB4/PON1/SCP2/LIPG/ABCA7	5
BP	GO:0046717	acid secretion	10/291	124/18670	2.47628e-05	0.00262007	0.00234679	ABAT/AGXT/APBA1/AVPR1A/ABCB4/SGK1/SLC6A1/ABCB11/ABCC4/GLS2	10
BP	GO:0009072	aromatic amino acid family metabolic process	6/291	39/18670	2.88257e-05	0.00295464	0.00264647	HDC/TAT/HAAO/AADAT/UROC1/IYD	6
BP	GO:0031960	response to corticosteroid	11/291	162/18670	4.86302e-05	0.00483354	0.0043294	AGXT/AVPR1A/EGFR/FLT3/GJB2/HSD3B1/HSD3B2/PFKFB1/SRD5A1/TAT/ACSBG1	11
BP	GO:0032371	regulation of sterol transport	7/291	63/18670	5.45357e-05	0.00511077	0.00457772	ABCB4/PON1/SCP2/LIPG/ABCA7/ABCG5/ABCG8	7
BP	GO:0032374	regulation of cholesterol transport	7/291	63/18670	5.45357e-05	0.00511077	0.00457772	ABCB4/PON1/SCP2/LIPG/ABCA7/ABCG5/ABCG8	7
BP	GO:0009108	coenzyme biosynthetic process	14/291	261/18670	6.43255e-05	0.00521681	0.0046727	ALDOB/ACSL1/GCK/GPD1/MOCS1/PFKFB1/NAMPT/MTHFS/ACSBG1/HAAO/PRKAG2/PANK1/ELOVL6/PPTC7	14
BP	GO:0008209	androgen metabolic process	5/291	28/18670	6.50942e-05	0.00521681	0.0046727	ESR1/HSD3B1/HSD3B2/SRD5A1/AKR1D1	5
BP	GO:0009074	aromatic amino acid family catabolic process	5/291	28/18670	6.50942e-05	0.00521681	0.0046727	HDC/TAT/HAAO/AADAT/UROC1	5
BP	GO:0006520	cellular amino acid metabolic process	17/291	366/18670	6.61417e-05	0.00521681	0.0046727	ABAT/AGXT/ART4/CBS/CKMT2/DAO/DPYS/HDC/IVD/SLC7A2/TAT/MTHFS/HAAO/GLS2/AADAT/UROC1/IYD	17
BP	GO:0015850	organic hydroxy compound transport	14/291	262/18670	6.70217e-05	0.00521681	0.0046727	ABAT/CHRNA4/ABCB4/PON1/RBP4/SCP2/SLC10A1/ABCB11/SYT7/LIPG/ABCA7/ABCG5/ABCG8/SYT9	14
BP	GO:0007626	locomotory behavior	12/291	198/18670	6.73897e-05	0.00521681	0.0046727	ABAT/APBA1/CHRNA4/DAB1/GPR37/FZD4/USP2/MYO15A/GPR88/NAV2/OLFM2/LRRK2	12
BP	GO:0033865	nucleoside bisphosphate metabolic process	10/291	140/18670	6.99816e-05	0.00521681	0.0046727	ACSL1/HMGCS2/SULT1E1/ACSBG1/AADAT/PANK1/ELOVL6/ACSM2A/ACOT12/ACSM2B	10
BP	GO:0033875	ribonucleoside bisphosphate metabolic process	10/291	140/18670	6.99816e-05	0.00521681	0.0046727	ACSL1/HMGCS2/SULT1E1/ACSBG1/AADAT/PANK1/ELOVL6/ACSM2A/ACOT12/ACSM2B	10
BP	GO:0034032	purine nucleoside bisphosphate metabolic process	10/291	140/18670	6.99816e-05	0.00521681	0.0046727	ACSL1/HMGCS2/SULT1E1/ACSBG1/AADAT/PANK1/ELOVL6/ACSM2A/ACOT12/ACSM2B	10
BP	GO:1901617	organic hydroxy compound biosynthetic process	14/291	271/18670	9.60756e-05	0.00700284	0.00627244	ALOX15/DAO/GPR37/HDC/HMGCS2/PLCG2/SCP2/AKR1D1/ABCB11/ACAA2/FAXDC2/PRKAG2/ELOVL6/IP6K3	14
BP	GO:1903793	positive regulation of anion transport	6/291	50/18670	0.000121619	0.008672	0.0077675	ABAT/AVPR1A/ABCB4/SLC6A1/ABCA7/ATP8A1	6
BP	GO:0071466	cellular response to xenobiotic stimulus	11/291	180/18670	0.000125455	0.00875518	0.00784201	NAT1/CYP2A6/CYP2A7/CYP2A13/CYP2C18/EGFR/ACSL1/GJB2/SRD5A1/UGT2B15/ACSM2B	11
BP	GO:0009064	glutamine family amino acid metabolic process	7/291	74/18670	0.000153321	0.0104769	0.00938416	ART4/DAO/TAT/MTHFS/GLS2/AADAT/UROC1	7
BP	GO:0030301	cholesterol transport	8/291	100/18670	0.000170349	0.0112002	0.0100321	ABCB4/PON1/SCP2/SYT7/LIPG/ABCA7/ABCG5/ABCG8	8
BP	GO:0006536	glutamate metabolic process	5/291	34/18670	0.000170735	0.0112002	0.0100321	TAT/MTHFS/GLS2/AADAT/UROC1	5
BP	GO:0009410	response to xenobiotic stimulus	14/291	292/18670	0.000209417	0.0134684	0.0120636	NAT1/ABAT/CYP2A6/CYP2A7/CYP2A13/CYP2C18/EGFR/ACSL1/GJB2/ABCB4/SLC6A1/SRD5A1/UGT2B15/ACSM2B	14
BP	GO:0001523	retinoid metabolic process	8/291	104/18670	0.000223495	0.0140974	0.012627	ADH4/CYP2C18/RBP4/SDC4/RDH16/ALDH1A2/CYP4V2/CYP27C1	8
BP	GO:0019373	epoxygenase P450 pathway	4/291	20/18670	0.00023001	0.0142346	0.0127499	CYP2A6/CYP2A7/CYP2A13/CYP2C18	4
BP	GO:0006637	acyl-CoA metabolic process	8/291	105/18670	0.000238712	0.0142359	0.0127511	ACSL1/HMGCS2/ACSBG1/AADAT/ELOVL6/ACSM2A/ACOT12/ACSM2B	8
BP	GO:0035383	thioester metabolic process	8/291	105/18670	0.000238712	0.0142359	0.0127511	ACSL1/HMGCS2/ACSBG1/AADAT/ELOVL6/ACSM2A/ACOT12/ACSM2B	8
BP	GO:0006633	fatty acid biosynthetic process	10/291	164/18670	0.000257965	0.0151094	0.0135335	ACADL/ALOX15/AVPR1A/HPGD/LIPG/PRKAG2/ELOVL6/ACSM2A/ACOT12/ACSM2B	10
BP	GO:0006694	steroid biosynthetic process	11/291	196/18670	0.000263927	0.0151874	0.0136033	HMGCS2/HSD3B1/HSD3B2/SCP2/SRD5A1/AKR1D1/ABCB11/ACAA2/FAXDC2/PRKAG2/ELOVL6	11
BP	GO:0097305	response to alcohol	12/291	233/18670	0.000309349	0.0174942	0.0156696	ABAT/ADCY1/AVPR1A/CDH1/GPLD1/HPGD/HSD3B1/HSD3B2/IL13/PTGDR/PTGFR/RBP4	12
BP	GO:0034308	primary alcohol metabolic process	7/291	85/18670	0.0003636	0.0199334	0.0178544	ADH4/GPD1/RBP4/SULT1E1/RDH16/ALDH1A2/CYP27C1	7
BP	GO:0032370	positive regulation of lipid transport	6/291	61/18670	0.000368283	0.0199334	0.0178544	ABCB4/PON1/SCP2/LIPG/ABCA7/ATP8A1	6
BP	GO:0015918	sterol transport	8/291	112/18670	0.000370713	0.0199334	0.0178544	ABCB4/PON1/SCP2/SYT7/LIPG/ABCA7/ABCG5/ABCG8	8
BP	GO:0006690	icosanoid metabolic process	8/291	114/18670	0.000417753	0.021902	0.0196176	ALOX15/AVPR1A/CYP2A6/CYP2A7/CYP2A13/CYP2C18/HPGD/PON1	8
BP	GO:0042572	retinol metabolic process	5/291	41/18670	0.000420679	0.021902	0.0196176	ADH4/RBP4/RDH16/ALDH1A2/CYP27C1	5
BP	GO:0042738	exogenous drug catabolic process	4/291	24/18670	0.000480294	0.0246151	0.0220477	CYP2A6/CYP2A7/CYP2A13/CYP2C18	4
BP	GO:0046460	neutral lipid biosynthetic process	5/291	43/18670	0.000526819	0.0261813	0.0234506	ANG/ACSL1/GPLD1/THRSP/GPAT2	5
BP	GO:0046463	acylglycerol biosynthetic process	5/291	43/18670	0.000526819	0.0261813	0.0234506	ANG/ACSL1/GPLD1/THRSP/GPAT2	5
BP	GO:0006702	androgen biosynthetic process	3/291	11/18670	0.000563609	0.0271859	0.0243504	HSD3B1/HSD3B2/SRD5A1	3
BP	GO:0010172	embryonic body morphogenesis	3/291	11/18670	0.000563609	0.0271859	0.0243504	GREM2/FUZ/PHLDB2	3
BP	GO:0006066	alcohol metabolic process	15/291	364/18670	0.00062645	0.0292283	0.0261798	ACADL/ADH4/GPD1/HMGCS2/PLCG2/PON1/RBP4/AKR1D1/SULT1E1/RDH16/ALDH1A2/ACAA2/ELOVL6/IP6K3/CYP27C1	15
BP	GO:0010038	response to metal ion	15/291	364/18670	0.00062645	0.0292283	0.0261798	ABAT/ADCY1/ALOX15/CDH1/EGFR/GPLD1/MT1E/SLC6A1/TAT/TFR2/SLC30A4/SYT7/HAAO/LRRK2/SYT9	15
BP	GO:0051188	cofactor biosynthetic process	14/291	326/18670	0.000632685	0.0292283	0.0261798	ALDOB/ACSL1/GCK/GPD1/MOCS1/PFKFB1/NAMPT/MTHFS/ACSBG1/HAAO/PRKAG2/PANK1/ELOVL6/PPTC7	14
BP	GO:0090277	positive regulation of peptide hormone secretion	7/291	96/18670	0.000759438	0.0340279	0.0304788	ABAT/EGFR/GCK/GPLD1/RBP4/TFR2/ANO1	7
BP	GO:0006706	steroid catabolic process	4/291	27/18670	0.000764638	0.0340279	0.0304788	STS/SRD5A1/AKR1D1/SULT1E1	4
BP	GO:0006805	xenobiotic metabolic process	8/291	125/18670	0.000770898	0.0340279	0.0304788	NAT1/CYP2A6/CYP2A7/CYP2A13/CYP2C18/ACSL1/UGT2B15/ACSM2B	8
BP	GO:0016042	lipid catabolic process	14/291	333/18670	0.000778077	0.0340279	0.0304788	ACADL/STS/GPLD1/IVD/PLCG2/SCP2/SRD5A1/AKR1D1/SULT1E1/LIPG/ACAA2/HAO2/LIPJ/CES4A	14
BP	GO:0071248	cellular response to metal ion	10/291	190/18670	0.000820893	0.035428	0.0317329	ADCY1/ALOX15/CDH1/EGFR/GPLD1/MT1E/TFR2/SYT7/LRRK2/SYT9	10
BP	GO:0032368	regulation of lipid transport	8/291	127/18670	0.000855386	0.0364372	0.0326368	ABCB4/PON1/SCP2/LIPG/ABCA7/ATP8A1/ABCG5/ABCG8	8
BP	GO:0019395	fatty acid oxidation	7/291	99/18670	0.000911789	0.0378566	0.0339081	ACADL/IVD/SCP2/ACAA2/HAO2/PRKAG2/CYP4V2	7
BP	GO:1901570	fatty acid derivative biosynthetic process	7/291	99/18670	0.000911789	0.0378566	0.0339081	ALOX15/AVPR1A/ACSL1/HMGCS2/HPGD/ACSBG1/ELOVL6	7
BP	GO:1901654	response to ketone	10/291	193/18670	0.000925383	0.0379407	0.0339835	ADCY1/AVPR1A/EGFR/GJB2/HSD3B1/HSD3B2/ABCB4/PTGDR/PTGFR/SRD5A1	10
BP	GO:0007494	midgut development	3/291	13/18670	0.000954587	0.0381835	0.0342009	DAB1/EGFR/ALDH1A2	3
BP	GO:0015812	gamma-aminobutyric acid transport	3/291	13/18670	0.000954587	0.0381835	0.0342009	ABAT/APBA1/SLC6A1	3
BP	GO:0034440	lipid oxidation	7/291	101/18670	0.00102606	0.0405478	0.0363187	ACADL/IVD/SCP2/ACAA2/HAO2/PRKAG2/CYP4V2	7
BP	GO:0015837	amine transport	7/291	102/18670	0.00108726	0.041992	0.0376123	ABAT/AVPR1A/CHRNA4/SLC6A1/SYT7/RHCG/SYT9	7
BP	GO:0072329	monocarboxylic acid catabolic process	8/291	132/18670	0.00109943	0.041992	0.0376123	ABAT/ACADL/AGXT/IVD/SCP2/AKR1D1/ACAA2/HAO2	8
BP	GO:0015914	phospholipid transport	6/291	75/18670	0.00111381	0.041992	0.0376123	ABCB4/SCP2/ABCA7/ATP8A1/PITPNM2/ABCG8	6
BP	GO:0150076	neuroinflammatory response	6/291	75/18670	0.00111381	0.041992	0.0376123	ADCY1/EGFR/IL13/NAMPT/TTBK1/LRRK2	6
BP	GO:0009165	nucleotide biosynthetic process	15/291	386/18670	0.00113327	0.04224	0.0378343	ADCY1/ALDOB/ACSL1/GCK/GPD1/PFKFB1/NAMPT/ACSBG1/HAAO/PRKAG2/PANK1/PID1/ELOVL6/GPAT2/UPP2	15
BP	GO:0042759	long-chain fatty acid biosynthetic process	4/291	30/18670	0.001151	0.0423386	0.0379227	ALOX15/HPGD/ELOVL6/ACOT12	4
BP	GO:0019369	arachidonic acid metabolic process	5/291	51/18670	0.00116173	0.0423386	0.0379227	ALOX15/CYP2A6/CYP2A7/CYP2A13/CYP2C18	5
BP	GO:0009071	serine family amino acid catabolic process	3/291	14/18670	0.00120098	0.0427237	0.0382676	AGXT/CBS/DAO	3
BP	GO:0016125	sterol metabolic process	9/291	166/18670	0.00120493	0.0427237	0.0382676	ACADL/HMGCS2/PON1/AKR1D1/ACAA2/FAXDC2/PRKAG2/ELOVL6/CYP4V2	9
BP	GO:0032355	response to estradiol	8/291	134/18670	0.00121137	0.0427237	0.0382676	EGFR/ESR1/GJB2/HPGD/PTGFR/SLC6A1/SRD5A1/ALDH1A2	8
BP	GO:1901293	nucleoside phosphate biosynthetic process	15/291	390/18670	0.00125522	0.0437993	0.039231	ADCY1/ALDOB/ACSL1/GCK/GPD1/PFKFB1/NAMPT/ACSBG1/HAAO/PRKAG2/PANK1/PID1/ELOVL6/GPAT2/UPP2	15
BP	GO:0015748	organophosphate ester transport	7/291	105/18670	0.00128822	0.0444774	0.0398384	ABCB4/SCP2/ABCA7/ATP8A1/PITPNM2/ABCG8/SLC25A41	7
BP	GO:0001505	regulation of neurotransmitter levels	14/291	354/18670	0.00139418	0.0476346	0.0426663	ABAT/ADCY1/AGXT/APBA1/CHRNA4/DPYS/HDC/SLC6A1/SLC7A2/SRD5A1/SYT7/TRIM9/LRRK2/SYT9	14
BP	GO:0006646	phosphatidylethanolamine biosynthetic process	3/291	15/18670	0.00148399	0.0501804	0.0449465	ALOX15/ETNK2/ETNPPL	3
BP	GO:1905954	positive regulation of lipid localization	6/291	82/18670	0.00176931	0.0592177	0.0530412	ABCB4/PON1/SCP2/LIPG/ABCA7/ATP8A1	6
BP	GO:0019372	lipoxygenase pathway	3/291	16/18670	0.00180551	0.0598188	0.0535797	ALOX15/HPGD/PON1	3
BP	GO:0017158	regulation of calcium ion-dependent exocytosis	7/291	112/18670	0.00187029	0.0613455	0.0549472	ADCY1/APBA1/CHRNA4/SYT7/TRIM9/LRRK2/SYT9	7
BP	GO:0045017	glycerolipid biosynthetic process	11/291	251/18670	0.00201835	0.0655464	0.0587099	ALOX15/ANG/ACSL1/GPD1/GPLD1/PLCG2/THRSP/ETNK2/PITPNM2/ETNPPL/GPAT2	11
BP	GO:0061900	glial cell activation	5/291	58/18670	0.00207435	0.0667046	0.0597473	EGFR/IL13/NAMPT/TTBK1/LRRK2	5
BP	GO:0030540	female genitalia development	3/291	17/18670	0.00216728	0.0690163	0.0618179	ESR1/RBP4/SRD5A1	3
BP	GO:0071241	cellular response to inorganic substance	10/291	217/18670	0.00221771	0.0698682	0.0625809	ADCY1/ALOX15/CDH1/EGFR/GPLD1/MT1E/TFR2/SYT7/LRRK2/SYT9	10
BP	GO:0046486	glycerolipid metabolic process	15/291	414/18670	0.00224255	0.0698682	0.0625809	ALOX15/ANG/CISH/ACSL1/GPD1/GPLD1/PLCG2/PON1/THRSP/LIPG/ETNK2/PITPNM2/ETNPPL/IP6K3/GPAT2	15
BP	GO:0009260	ribonucleotide biosynthetic process	12/291	293/18670	0.00225794	0.0698682	0.0625809	ADCY1/ALDOB/ACSL1/GCK/GPD1/PFKFB1/ACSBG1/PRKAG2/PANK1/PID1/ELOVL6/UPP2	12
BP	GO:0034103	regulation of tissue remodeling	6/291	88/18670	0.00253427	0.0776862	0.0695835	EGFR/HRG/LTBP3/THBS4/SYT7/SIGLEC15	6
BP	GO:0051957	positive regulation of amino acid transport	3/291	18/18670	0.00257096	0.078081	0.0699371	ABAT/AVPR1A/SLC6A1	3
BP	GO:0016079	synaptic vesicle exocytosis	7/291	119/18670	0.00263827	0.0793901	0.0711097	ADCY1/APBA1/CHRNA4/SYT7/TRIM9/LRRK2/SYT9	7
BP	GO:0046390	ribose phosphate biosynthetic process	12/291	300/18670	0.00273904	0.0816733	0.0731547	ADCY1/ALDOB/ACSL1/GCK/GPD1/PFKFB1/ACSBG1/PRKAG2/PANK1/PID1/ELOVL6/UPP2	12
BP	GO:0048545	response to steroid hormone	14/291	385/18670	0.00301047	0.0876047	0.0784675	AGXT/AVPR1A/EGFR/ESR1/FLT3/GJB2/HSD3B1/HSD3B2/PFKFB1/PGR/SRD5A1/TAT/NR1I3/ACSBG1	14
BP	GO:0035338	long-chain fatty-acyl-CoA biosynthetic process	3/291	19/18670	0.00301809	0.0876047	0.0784675	ACSL1/ACSBG1/ELOVL6	3
BP	GO:0060457	negative regulation of digestive system process	3/291	19/18670	0.00301809	0.0876047	0.0784675	ABCG5/ABCG8/WNK3	3
BP	GO:0051047	positive regulation of secretion	15/291	428/18670	0.00307048	0.0882899	0.0790812	ABAT/ANG/AVPR1A/EGFR/GCK/GPLD1/IL13/RBP4/SDC4/SLC6A1/TFR2/SYT7/ANO1/LRRK2/SYT9	15
BP	GO:0008207	C21-steroid hormone metabolic process	4/291	39/18670	0.00309553	0.0882899	0.0790812	HSD3B1/HSD3B2/SRD5A1/AKR1D1	4
BP	GO:1905952	regulation of lipid localization	8/291	157/18670	0.0032714	0.0921087	0.0825017	ABCB4/PON1/SCP2/LIPG/ABCA7/ATP8A1/ABCG5/ABCG8	8
BP	GO:1901655	cellular response to ketone	6/291	93/18670	0.00334218	0.0921087	0.0825017	ADCY1/EGFR/GJB2/PTGDR/PTGFR/SRD5A1	6
BP	GO:0014046	dopamine secretion	4/291	40/18670	0.00339791	0.0921087	0.0825017	ABAT/CHRNA4/SYT7/SYT9	4
BP	GO:0014059	regulation of dopamine secretion	4/291	40/18670	0.00339791	0.0921087	0.0825017	ABAT/CHRNA4/SYT7/SYT9	4
BP	GO:0019835	cytolysis	4/291	40/18670	0.00339791	0.0921087	0.0825017	C8A/C8B/GPLD1/HRG	4
BP	GO:0044058	regulation of digestive system process	4/291	40/18670	0.00339791	0.0921087	0.0825017	SGK1/ABCG5/ABCG8/WNK3	4
BP	GO:0015800	acidic amino acid transport	5/291	66/18670	0.00365808	0.0960698	0.0860497	ABAT/APBA1/AVPR1A/SLC6A1/GLS2	5
BP	GO:1903305	regulation of regulated secretory pathway	8/291	160/18670	0.00367058	0.0960698	0.0860497	ADCY1/APBA1/CHRNA4/IL13/SYT7/TRIM9/LRRK2/SYT9	8
BP	GO:0044070	regulation of anion transport	6/291	95/18670	0.00371391	0.0960698	0.0860497	ABAT/AVPR1A/ABCB4/SLC6A1/ABCA7/ATP8A1	6
BP	GO:0051952	regulation of amine transport	6/291	95/18670	0.00371391	0.0960698	0.0860497	ABAT/AVPR1A/CHRNA4/SLC6A1/SYT7/SYT9	6
BP	GO:0019432	triglyceride biosynthetic process	4/291	41/18670	0.00371978	0.0960698	0.0860497	ACSL1/GPLD1/THRSP/GPAT2	4
BP	GO:0035337	fatty-acyl-CoA metabolic process	4/291	41/18670	0.00371978	0.0960698	0.0860497	ACSL1/ACSBG1/ELOVL6/ACSM2A	4
CC	GO:0016323	basolateral plasma membrane	13/301	217/19717	3.08956e-05	0.0105045	0.00972398	AQP4/ABCC6/EGFR/ERBB2/HPGD/KCNJ4/SLC10A1/ABCC4/SLC22A7/RHCG/SLC2A9/SLC22A9/ALPK2	13
CC	GO:0045177	apical part of cell	17/301	384/19717	9.3221e-05	0.0136245	0.0126121	ABCC6/DAB1/EGFR/ERBB2/KCNE1/ABCB4/USH2A/ABCB11/MPDZ/SLC17A4/RHCG/ANO1/SLC2A9/SHROOM3/ABCG5/ABCG8/OCLN	17
CC	GO:0016324	apical plasma membrane	15/301	318/19717	0.000120216	0.0136245	0.0126121	ABCC6/EGFR/ERBB2/KCNE1/ABCB4/USH2A/MPDZ/SLC17A4/RHCG/ANO1/SLC2A9/SHROOM3/ABCG5/ABCG8/OCLN	15
CC	GO:0062023	collagen-containing extracellular matrix	17/301	406/19717	0.000181521	0.0154293	0.0142829	ANG/F9/HRG/LTBP3/PLG/PRG2/SPP2/TECTA/THBS4/USH2A/CILP/PRG4/MMRN1/THSD4/INHBE/ANGPTL6/NAV2	17
CC	GO:0044438	microbody part	7/301	100/19717	0.000859386	0.0452224	0.0418622	AGXT/DAO/ACSL1/SCP2/SYT7/HAO2/FNDC5	7
CC	GO:0044439	peroxisomal part	7/301	100/19717	0.000859386	0.0452224	0.0418622	AGXT/DAO/ACSL1/SCP2/SYT7/HAO2/FNDC5	7
CC	GO:0005777	peroxisome	8/301	134/19717	0.00106406	0.0452224	0.0418622	AGXT/DAO/ACSL1/SCP2/XDH/SYT7/HAO2/FNDC5	8
CC	GO:0042579	microbody	8/301	134/19717	0.00106406	0.0452224	0.0418622	AGXT/DAO/ACSL1/SCP2/XDH/SYT7/HAO2/FNDC5	8
CC	GO:0043296	apical junction complex	8/301	143/19717	0.0016135	0.0596775	0.0552432	CDH1/MPDZ/MAGI2/CLDN14/CLDN15/SHROOM3/WNK3/OCLN	8
CC	GO:0016328	lateral plasma membrane	5/301	57/19717	0.00175522	0.0596775	0.0552432	ABCC6/CDH1/GJB2/CLDN15/OCLN	5
MF	GO:0050662	coenzyme binding	20/287	291/17697	6.3473e-08	3.5291e-05	2.96653e-05	ABAT/ACADL/ADH4/AGXT/CBS/DAO/GPD1/HDC/HPGD/IVD/SCP2/SRD5A1/TAT/XDH/AADAT/HAO2/PANK1/ETNPPL/ACOT12/IYD	20
MF	GO:0022804	active transmembrane transporter activity	21/287	362/17697	5.0963e-07	0.000141677	0.000119092	ABCC6/ABCB4/SLC6A1/SLC10A1/SLCO2A1/ABCB11/SLC28A1/SLC17A4/ABCC4/ABCA7/ABCA9/ATP8A1/SLC22A7/ABCA6/SLC2A8/SLC38A4/SLC2A9/ABCG5/ABCG8/SLC22A9/SLC16A14	21
MF	GO:0005319	lipid transporter activity	12/287	131/17697	1.50052e-06	0.000278096	0.000233765	ABCB4/RBP4/SLC10A1/SLCO2A1/ABCB11/ABCA7/ABCA9/ABCA6/PITPNM2/ABCG5/ABCG8/SLC22A9	12
MF	GO:0019842	vitamin binding	12/287	138/17697	2.60379e-06	0.000361926	0.000304232	ABAT/ADH4/AGXT/CBS/HDC/RBP4/TAT/ALDH1A2/MTHFS/AADAT/ETNPPL/CYP27C1	12
MF	GO:0016614	oxidoreductase activity, acting on CH-OH group of donors	11/287	128/17697	7.6468e-06	0.000850324	0.000714774	ADH4/GPD1/HPGD/HSD3B1/HSD3B2/AKR1D1/RDH16/ABCC4/HAO2/LDHAL6B/LDHAL6A	11
MF	GO:0008483	transaminase activity	5/287	21/17697	1.7816e-05	0.00116563	0.000979815	ABAT/AGXT/TAT/AADAT/ETNPPL	5
MF	GO:0042626	ATPase activity, coupled to transmembrane movement of substances	10/287	115/17697	1.7916e-05	0.00116563	0.000979815	ABCC6/ABCB4/ABCB11/ABCC4/ABCA7/ABCA9/ATP8A1/ABCA6/ABCG5/ABCG8	10
MF	GO:0043492	ATPase activity, coupled to movement of substances	10/287	115/17697	1.7916e-05	0.00116563	0.000979815	ABCC6/ABCB4/ABCB11/ABCC4/ABCA7/ABCA9/ATP8A1/ABCA6/ABCG5/ABCG8	10
MF	GO:0016229	steroid dehydrogenase activity	6/287	35/17697	1.88681e-05	0.00116563	0.000979815	HSD3B1/HSD3B2/SRD5A1/AKR1D1/RDH16/HSD17B13	6
MF	GO:0016616	oxidoreductase activity, acting on the CH-OH group of donors, NAD or NADP as acceptor	10/287	119/17697	2.41595e-05	0.00117223	0.000985362	ADH4/GPD1/HPGD/HSD3B1/HSD3B2/AKR1D1/RDH16/ABCC4/LDHAL6B/LDHAL6A	10
MF	GO:0030170	pyridoxal phosphate binding	7/287	54/17697	2.52998e-05	0.00117223	0.000985362	ABAT/AGXT/CBS/HDC/TAT/AADAT/ETNPPL	7
MF	GO:0070279	vitamin B6 binding	7/287	54/17697	2.52998e-05	0.00117223	0.000985362	ABAT/AGXT/CBS/HDC/TAT/AADAT/ETNPPL	7
MF	GO:0016769	transferase activity, transferring nitrogenous groups	5/287	23/17697	2.86874e-05	0.00122694	0.00103135	ABAT/AGXT/TAT/AADAT/ETNPPL	5
MF	GO:0015405	P-P-bond-hydrolysis-driven transmembrane transporter activity	10/287	123/17697	3.21834e-05	0.00127814	0.00107439	ABCC6/ABCB4/ABCB11/ABCC4/ABCA7/ABCA9/ATP8A1/ABCA6/ABCG5/ABCG8	10
MF	GO:0015399	primary active transmembrane transporter activity	10/287	125/17697	3.69851e-05	0.00137092	0.00115238	ABCC6/ABCB4/ABCB11/ABCC4/ABCA7/ABCA9/ATP8A1/ABCA6/ABCG5/ABCG8	10
MF	GO:0008514	organic anion transmembrane transporter activity	13/287	211/17697	4.23984e-05	0.00147334	0.00123848	SLC6A1/SLC7A2/SLC10A1/SLCO2A1/ABCB11/SLC17A4/SLC22A7/SLC2A8/SLC38A4/SLC2A9/SLC22A9/SLC16A14/SLC25A41	13
MF	GO:1901681	sulfur compound binding	14/287	250/17697	6.14116e-05	0.00200852	0.00168834	ACADL/ANG/CBS/HRG/PRG2/SCP2/CCL23/THBS4/LIPG/TENM1/PANK1/GREM2/NAV2/ACOT12	14
MF	GO:0020037	heme binding	10/287	135/17697	7.12549e-05	0.00220098	0.00185013	CBS/CYP2A6/CYP2A7/CYP2A13/CYP2C18/HBG2/HRG/EPX/CYP4V2/CYP27C1	10
MF	GO:0003996	acyl-CoA ligase activity	4/287	16/17697	0.000105706	0.00279869	0.00235255	ACSL1/ACSBG1/ACSM2A/ACSM2B	4
MF	GO:0008392	arachidonic acid epoxygenase activity	4/287	16/17697	0.000105706	0.00279869	0.00235255	CYP2A6/CYP2A7/CYP2A13/CYP2C18	4
MF	GO:0016918	retinal binding	4/287	16/17697	0.000105706	0.00279869	0.00235255	ADH4/RBP4/ALDH1A2/CYP27C1	4
MF	GO:0046906	tetrapyrrole binding	10/287	145/17697	0.000129436	0.0032712	0.00274974	CBS/CYP2A6/CYP2A7/CYP2A13/CYP2C18/HBG2/HRG/EPX/CYP4V2/CYP27C1	10
MF	GO:0008391	arachidonic acid monooxygenase activity	4/287	17/17697	0.000136473	0.00329908	0.00277317	CYP2A6/CYP2A7/CYP2A13/CYP2C18	4
MF	GO:0008028	monocarboxylic acid transmembrane transporter activity	6/287	50/17697	0.00015067	0.00349052	0.0029341	SLC6A1/SLC10A1/SLCO2A1/ABCB11/SLC22A9/SLC16A14	6
MF	GO:0005506	iron ion binding	10/287	152/17697	0.000190654	0.00424014	0.00356422	ALOX15/CYP2A6/CYP2A7/CYP2A13/CYP2C18/XDH/FAXDC2/HAAO/CYP4V2/CYP27C1	10
MF	GO:0004497	monooxygenase activity	8/287	99/17697	0.000207429	0.00443579	0.00372869	CYP2A6/CYP2A7/CYP2A13/CYP2C18/AKR1D1/FAXDC2/CYP4V2/CYP27C1	8
MF	GO:0016408	C-acyltransferase activity	4/287	20/17697	0.000267364	0.00550571	0.00462805	SCP2/ACAA2/ACSM2A/ACSM2B	4
MF	GO:0008509	anion transmembrane transporter activity	15/287	327/17697	0.000307325	0.0061026	0.00512979	CLCN1/SLC6A1/SLC7A2/SLC10A1/SLCO2A1/ABCB11/SLC17A4/SLC22A7/SLC2A8/SLC38A4/ANO1/SLC2A9/SLC22A9/SLC16A14/SLC25A41	15
MF	GO:0015645	fatty acid ligase activity	4/287	21/17697	0.000326081	0.00625175	0.00525516	ACSL1/ACSBG1/ACSM2A/ACSM2B	4
MF	GO:0004955	prostaglandin receptor activity	3/287	10/17697	0.000465496	0.0083489	0.00701801	HPGD/PTGDR/PTGFR	3
MF	GO:0008525	phosphatidylcholine transporter activity	3/287	10/17697	0.000465496	0.0083489	0.00701801	ABCB4/ABCA7/PITPNM2	3
MF	GO:0004954	prostanoid receptor activity	3/287	11/17697	0.000632394	0.0109878	0.00923628	HPGD/PTGDR/PTGFR	3
MF	GO:0016405	CoA-ligase activity	4/287	26/17697	0.000764202	0.0128756	0.0108231	ACSL1/ACSBG1/ACSM2A/ACSM2B	4
MF	GO:0005342	organic acid transmembrane transporter activity	9/287	153/17697	0.000891765	0.0141663	0.0119081	SLC6A1/SLC7A2/SLC10A1/SLCO2A1/ABCB11/SLC17A4/SLC38A4/SLC22A9/SLC16A14	9
MF	GO:0046943	carboxylic acid transmembrane transporter activity	9/287	153/17697	0.000891765	0.0141663	0.0119081	SLC6A1/SLC7A2/SLC10A1/SLCO2A1/ABCB11/SLC17A4/SLC38A4/SLC22A9/SLC16A14	9
MF	GO:0016746	transferase activity, transferring acyl groups	12/287	264/17697	0.00130881	0.0196892	0.0165506	NAT1/HMGCS2/SCP2/ACAA2/ELOVL6/ZDHHC11/ACSM2A/GPAT2/CLYBL/ACSM2B/GLYATL3/ZDHHC11B	12
MF	GO:0016878	acid-thiol ligase activity	4/287	30/17697	0.00133136	0.0196892	0.0165506	ACSL1/ACSBG1/ACSM2A/ACSM2B	4
MF	GO:0070330	aromatase activity	3/287	14/17697	0.00134567	0.0196892	0.0165506	CYP2A7/CYP2A13/CYP2C18	3
MF	GO:0004953	icosanoid receptor activity	3/287	15/17697	0.00166201	0.0230948	0.0194133	HPGD/PTGDR/PTGFR	3
MF	GO:0019841	retinol binding	3/287	15/17697	0.00166201	0.0230948	0.0194133	ADH4/RBP4/CYP27C1	3
MF	GO:0016712	oxidoreductase activity, acting on paired donors, with incorporation or reduction of molecular oxygen, reduced flavin or flavoprotein as one donor, and incorporation of one atom of oxygen	4/287	32/17697	0.00170315	0.0230948	0.0194133	CYP2A6/CYP2A7/CYP2A13/CYP2C18	4
MF	GO:0015291	secondary active transmembrane transporter activity	11/287	237/17697	0.00174731	0.0230948	0.0194133	SLC6A1/SLC10A1/SLCO2A1/SLC28A1/SLC17A4/SLC22A7/SLC2A8/SLC38A4/SLC2A9/SLC22A9/SLC16A14	11
MF	GO:0008201	heparin binding	9/287	169/17697	0.00178611	0.0230948	0.0194133	ANG/HRG/PRG2/CCL23/THBS4/LIPG/TENM1/GREM2/NAV2	9
MF	GO:0015347	sodium-independent organic anion transmembrane transporter activity	3/287	16/17697	0.00202115	0.02554	0.0214687	SLCO2A1/SLC22A7/SLC22A9	3
MF	GO:0033218	amide binding	14/287	356/17697	0.00211081	0.0260803	0.0219228	ACADL/ANG/APBA1/AVPR1A/GPR37/NPR3/SCP2/SRD5A1/FZD4/APBB3/MTHFS/FBXO2/PANK1/ACOT12	14
MF	GO:0005501	retinoid binding	4/287	35/17697	0.00238729	0.0282852	0.0237762	ADH4/RBP4/ALDH1A2/CYP27C1	4
MF	GO:0042623	ATPase activity, coupled	12/287	284/17697	0.00240887	0.0282852	0.0237762	ABCC6/MYO1E/ABCB4/ABCB11/ABCC4/ABCA7/ABCA9/ATP8A1/ABCA6/DNAI1/ABCG5/ABCG8	12
MF	GO:0015293	symporter activity	8/287	144/17697	0.00244188	0.0282852	0.0237762	SLC6A1/SLC10A1/SLC28A1/SLC17A4/SLC2A8/SLC38A4/SLC2A9/SLC16A14	8
MF	GO:0019825	oxygen binding	4/287	36/17697	0.00265189	0.029489	0.0247882	CBS/CYP2A7/CYP2C18/HBG2	4
MF	GO:0019840	isoprenoid binding	4/287	36/17697	0.00265189	0.029489	0.0247882	ADH4/RBP4/ALDH1A2/CYP27C1	4
MF	GO:0008395	steroid hydroxylase activity	4/287	38/17697	0.00324005	0.0353229	0.0296921	CYP2A6/CYP2A7/CYP2A13/CYP2C18	4
MF	GO:0016829	lyase activity	9/287	187/17697	0.00352971	0.0377407	0.0317245	ADCY1/ALDOB/CBS/HDC/MOCS1/CA10/ETNPPL/UROC1/CLYBL	9
MF	GO:0016877	ligase activity, forming carbon-sulfur bonds	4/287	40/17697	0.0039113	0.0410318	0.0344909	ACSL1/ACSBG1/ACSM2A/ACSM2B	4
MF	GO:0016705	oxidoreductase activity, acting on paired donors, with incorporation or reduction of molecular oxygen	8/287	159/17697	0.0044712	0.0460368	0.0386981	CYP2A6/CYP2A7/CYP2A13/CYP2C18/AKR1D1/FAXDC2/CYP4V2/CYP27C1	8
MF	GO:0016747	transferase activity, transferring acyl groups other than amino-acyl groups	10/287	232/17697	0.0047132	0.0476462	0.0400509	NAT1/SCP2/ACAA2/ELOVL6/ZDHHC11/ACSM2A/GPAT2/ACSM2B/GLYATL3/ZDHHC11B	10
MF	GO:0000062	fatty-acyl-CoA binding	3/287	22/17697	0.0051732	0.0513625	0.0431748	ACADL/SCP2/ACOT12	3
MF	GO:0030159	receptor signaling complex scaffold activity	3/287	23/17697	0.00587864	0.0573425	0.0482016	MAGI2/LRRK2/ROPN1B	3
MF	GO:0015294	solute:cation symporter activity	6/287	102/17697	0.0063439	0.0608139	0.0511196	SLC6A1/SLC10A1/SLC28A1/SLC17A4/SLC2A8/SLC2A9	6
MF	GO:0016763	transferase activity, transferring pentosyl groups	4/287	47/17697	0.00698855	0.0658582	0.0553598	ART4/NAMPT/PARP6/UPP2	4
MF	GO:0016830	carbon-carbon lyase activity	4/287	51/17697	0.00931111	0.086283	0.0725287	ALDOB/HDC/MOCS1/CLYBL	4
MF	GO:1901567	fatty acid derivative binding	3/287	28/17697	0.0102462	0.0933919	0.0785044	ACADL/SCP2/ACOT12	3
MF	GO:0005351	carbohydrate:proton symporter activity	2/287	10/17697	0.0108231	0.0970589	0.0815868	SLC2A8/SLC2A9	2
MF	GO:0032947	protein-containing complex scaffold activity	3/287	29/17697	0.0112937	0.0981136	0.0824734	MAGI2/LRRK2/ROPN1B	3
MF	GO:0033764	steroid dehydrogenase activity, acting on the CH-OH group of donors, NAD or NADP as acceptor	3/287	29/17697	0.0112937	0.0981136	0.0824734	HSD3B1/HSD3B2/RDH16	3
KEGG	hsa02010	ABC transporters	9/157	45/8076	1.53578e-07	3.74731e-05	3.39489e-05	ABCC6/ABCB4/ABCB11/ABCC4/ABCA7/ABCA9/ABCA6/ABCG5/ABCG8	9
KEGG	hsa04976	Bile secretion	11/157	90/8076	1.17043e-06	0.000142792	0.000129363	ADCY1/AQP4/ABCB4/SLC10A1/UGT2B10/UGT2B15/ABCB11/ABCC4/SLC22A7/ABCG5/ABCG8	11
KEGG	hsa00140	Steroid hormone biosynthesis	8/157	61/8076	2.09686e-05	0.00170545	0.00154506	STS/HSD3B1/HSD3B2/SRD5A1/AKR1D1/SULT1E1/UGT2B10/UGT2B15	8
KEGG	hsa00830	Retinol metabolism	8/157	68/8076	4.6912e-05	0.00286163	0.00259251	ADH4/CYP2A6/CYP2C18/UGT2B10/UGT2B15/RDH16/ALDH1A2/CYP27C1	8
KEGG	hsa00983	Drug metabolism - other enzymes	8/157	79/8076	0.000138205	0.0067444	0.00611011	NAT1/CDA/CYP2A6/DPYS/UGT2B10/UGT2B15/XDH/UPP2	8
KEGG	hsa05230	Central carbon metabolism in cancer	7/157	70/8076	0.000394075	0.0160257	0.0145186	EGFR/ERBB2/FLT3/GCK/GLS2/LDHAL6B/LDHAL6A	7
KEGG	hsa01212	Fatty acid metabolism	6/157	57/8076	0.000785178	0.0273691	0.0247951	ACADL/ACSL1/SCP2/ACAA2/ACSBG1/ELOVL6	6
KEGG	hsa05204	Chemical carcinogenesis	7/157	82/8076	0.00102908	0.0313868	0.028435	NAT1/ADH4/CYP2A6/CYP2A13/CYP2C18/UGT2B10/UGT2B15	7
KEGG	hsa00071	Fatty acid degradation	5/157	44/8076	0.00153439	0.041599	0.0376867	ACADL/ADH4/ACSL1/ACAA2/ACSBG1	5
KEGG	hsa00650	Butanoate metabolism	4/157	28/8076	0.00195616	0.0477303	0.0432414	ABAT/HMGCS2/ACSM2A/ACSM2B	4
KEGG	hsa03320	PPAR signaling pathway	6/157	78/8076	0.00397995	0.0882825	0.0799798	ACADL/ACSL1/HMGCS2/SCP2/ACSBG1/PLIN4	6
KEGG	hsa04922	Glucagon signaling pathway	7/157	107/8076	0.0047172	0.0959163	0.0868957	GCK/GYS2/PFKFB1/PRKAG2/CREB3L3/LDHAL6B/LDHAL6A	7
