# Supplementary material for: Multi-View Radiomics Feature Fusion Reveals Distinct Immuno-Oncological Characteristics and Clinical Prognoses in Hepatocellular Carcinoma
Source: Cancers (Basel). 2023 Apr 17;15(8):2338. doi: 10.3390/cancers15082338 (PMC10137067; doi:10.3390/cancers15082338)
Supplement: Supplementary file 1 [file cancers-15-02338-s001.zip › Table S6.xlsx]

## Sheet: sheet1
PRF	Correlated Pathway	Module	Correlation	P.value	FDR
PRF1	Negative Regulation Of Immunoglobulin Production	Green	0.715271	2.21e-05	0.00506443
PRF1	Energy Homeostasis	Darkorange	0.706897	2.99e-05	0.00534842
PRF1	Natural Killer Cell Differentiation	Green	0.68867	5.66e-05	0.00584747
PRF1	Positive Regulation Of Cellular Carbohydrate Metabolic Process	Darkorange	0.687685	5.85e-05	0.00587551
PRF1	Positive Regulation Of Glucose Metabolic Process	Darkorange	0.673399	9.35e-05	0.00619017
PRF1	Adipose Tissue Development	Darkorange	0.669458	0.000105927	0.00619673
PRF1	1 Phosphatidylinositol 3 Kinase Regulator Activity	Darkorange	0.669458	0.000105927	0.00619673
PRF1	Regulation Of Carbohydrate Biosynthetic Process	Darkorange	0.665517	0.00011982	0.00627332
PRF1	Cellular Response To Ketone	Red	0.664532	0.000123536	0.00627332
PRF1	Positive Regulation Of Carbohydrate Metabolic Process	Darkorange	0.658128	0.000150259	0.00645354
PRF1	Regulation Of Ubiquitin Protein Ligase Activity	Yellow	-0.681281	7.24e-05	0.00619017
PRF1	Positive Regulation Of Meiotic Cell Cycle	Yellow	-0.680788	7.36e-05	0.00619017
PRF1	Regulation Of Mitotic Cell Cycle Spindle Assembly Checkpoint	Yellow	-0.631034	0.000328082	0.00827645
PRF1	Anaphase Promoting Complex	Yellow	-0.630542	0.000332551	0.00830685
PRF1	Cytokinetic Process	Yellow	-0.585714	0.00104416	0.0127824
PRF1	Regulation Of Meiotic Cell Cycle	Yellow	-0.580296	0.00118637	0.0132849
PRF1	Regulation Of Meiotic Nuclear Division	Yellow	-0.572414	0.00142321	0.0142657
PRF1	Positive Regulation Of Ubiquitin Protein Ligase Activity	Yellow	-0.571429	0.00145553	0.0144756
PRF1	Midbody Abscission	Yellow	-0.563054	0.00175697	0.0157293
PRF1	Dna Polymerase Binding	Yellow	-0.561084	0.0018353	0.0160425
PRF2	Cd4 Positive Or Cd8 Positive Alpha Beta T Cell Lineage Commitment	Green	0.764039	3.63e-06	0.00411137
PRF2	Positive Regulation Of Lymphocyte Chemotaxis	Green	0.764039	3.63e-06	0.00411137
PRF2	T Helper 17 Type Immune Response	Green	0.760591	4.08e-06	0.00411137
PRF2	T Cell Differentiation Involved In Immune Response	Green	0.758621	4.37e-06	0.00411137
PRF2	Positive T Cell Selection	Green	0.752217	5.49e-06	0.00446024
PRF2	Regulation Of Lymphocyte Chemotaxis	Green	0.729557	1.29e-05	0.00505555
PRF2	T Helper 17 Cell Differentiation	Green	0.722167	1.71e-05	0.00506443
PRF2	Cd4 Positive Alpha Beta T Cell Activation	Green	0.721182	1.77e-05	0.00506443
PRF2	Natural Killer Cell Differentiation	Green	0.719704	1.87e-05	0.00506443
PRF2	Tolerance Induction	Green	0.716256	2.13e-05	0.00506443
PRF2	Positive Regulation Of Ubiquitin Protein Transferase Activity	Yellow	-0.583251	0.00110684	0.0129949
PRF2	Regulation Of Mitotic Cell Cycle Spindle Assembly Checkpoint	Yellow	-0.581281	0.00115932	0.0131926
PRF2	Dna Polymerase Binding	Yellow	-0.526108	0.00382559	0.0234159
PRF2	Histone Exchange	Yellow	-0.515271	0.00473529	0.0261817
PRF2	Dna Replication Origin Binding	Yellow	-0.512808	0.00496615	0.0268671
PRF2	Regulation Of Mitotic Sister Chromatid Segregation	Yellow	-0.504926	0.00577095	0.0292834
PRF2	Negative Regulation Of Metaphase Anaphase Transition Of Cell Cycle	Yellow	-0.497044	0.00668487	0.0316342
PRF2	Anaphase Promoting Complex	Yellow	-0.496552	0.00674587	0.0317238
PRF2	Mitotic Metaphase Plate Congression	Yellow	-0.494089	0.00705807	0.0323768
PRF2	Attachment Of Spindle Microtubules To Kinetochore	Yellow	-0.48867	0.00778855	0.0344769
PRF3	Natural Killer Cell Differentiation	Green	0.739901	8.71e-06	0.00503081
PRF3	Cd4 Positive Or Cd8 Positive Alpha Beta T Cell Lineage Commitment	Green	0.714286	2.29e-05	0.00506443
PRF3	Regulation Of Jnk Cascade	Green	0.688177	5.75e-05	0.00587551
PRF3	Phosphatidylinositol 3 Kinase Regulator Activity	Darkorange	0.687685	5.85e-05	0.00587551
PRF3	T Helper Cell Lineage Commitment	Green	0.684236	6.57e-05	0.00604776
PRF3	T Helper 17 Cell Differentiation	Green	0.675862	8.64e-05	0.00619017
PRF3	T Cell Lineage Commitment	Green	0.675369	8.78e-05	0.00619017
PRF3	1 Phosphatidylinositol 3 Kinase Regulator Activity	Darkorange	0.673399	9.35e-05	0.00619017
PRF3	Energy Homeostasis	Darkorange	0.652709	0.000176721	0.00687893
PRF3	Response To Cholesterol	Green	0.650739	0.000187313	0.00700976
PRF3	Anaphase Promoting Complex	Yellow	-0.665025	0.000121665	0.00627332
PRF3	Regulation Of Ubiquitin Protein Ligase Activity	Yellow	-0.659113	0.000145843	0.00645338
PRF3	Regulation Of Mitotic Cell Cycle Spindle Assembly Checkpoint	Yellow	-0.628571	0.000350966	0.00849579
PRF3	Positive Regulation Of Ubiquitin Protein Ligase Activity	Yellow	-0.610837	0.000561236	0.00983274
PRF3	Nuclear Ubiquitin Ligase Complex	Yellow	-0.610345	0.000568383	0.00986457
PRF3	Positive Regulation Of Meiotic Cell Cycle	Yellow	-0.572906	0.00140729	0.0142182
PRF3	Positive Regulation Of Chromosome Segregation	Yellow	-0.54335	0.0026879	0.0195569
PRF3	Positive Regulation Of Ubiquitin Protein Transferase Activity	Yellow	-0.527586	0.00371405	0.0231437
PRF3	Exit From Mitosis	Yellow	-0.52266	0.00409712	0.024268
PRF3	Regulation Of Meiotic Cell Cycle	Yellow	-0.517241	0.00455729	0.0258001
PRF4	Cd4 Positive Or Cd8 Positive Alpha Beta T Cell Lineage Commitment	Green	0.774877	2.6e-06	0.00411137
PRF4	Natural Killer Cell Differentiation	Green	0.763054	3.75e-06	0.00411137
PRF4	T Helper 17 Cell Differentiation	Green	0.745813	6.97e-06	0.00492913
PRF4	T Helper Cell Lineage Commitment	Green	0.731527	1.2e-05	0.00505555
PRF4	Negative Regulation Of Immunoglobulin Production	Green	0.729557	1.29e-05	0.00505555
PRF4	Regulation Of Jnk Cascade	Green	0.729557	1.29e-05	0.00505555
PRF4	T Helper 17 Type Immune Response	Green	0.714778	2.25e-05	0.00506443
PRF4	T Cell Lineage Commitment	Green	0.708867	2.79e-05	0.00525398
PRF4	T Cell Differentiation Involved In Immune Response	Green	0.69803	4.1e-05	0.0054459
PRF4	1 Phosphatidylinositol 3 Kinase Regulator Activity	Darkorange	0.694089	4.7e-05	0.00573325
PRF4	Regulation Of Mitotic Cell Cycle Spindle Assembly Checkpoint	Yellow	-0.721675	1.74e-05	0.00506443
PRF4	Regulation Of Ubiquitin Protein Ligase Activity	Yellow	-0.704926	3.21e-05	0.0054459
PRF4	Anaphase Promoting Complex	Yellow	-0.702463	3.51e-05	0.0054459
PRF4	Positive Regulation Of Ubiquitin Protein Ligase Activity	Yellow	-0.633005	0.000310728	0.00811
PRF4	Positive Regulation Of Meiotic Cell Cycle	Yellow	-0.61133	0.000554167	0.0098102
PRF4	Positive Regulation Of Chromosome Segregation	Yellow	-0.605911	0.000636376	0.0104059
PRF4	Nuclear Ubiquitin Ligase Complex	Yellow	-0.604926	0.000652416	0.0104499
PRF4	Histone Exchange	Yellow	-0.596059	0.000813421	0.011433
PRF4	Negative Regulation Of Metaphase Anaphase Transition Of Cell Cycle	Yellow	-0.580296	0.00118637	0.0132849
PRF4	Positive Regulation Of Ubiquitin Protein Transferase Activity	Yellow	-0.578325	0.0012421	0.0134361
PRF5	Natural Killer Cell Differentiation	Green	0.766502	3.35e-06	0.00411137
PRF5	T Helper 17 Cell Differentiation	Green	0.721675	1.74e-05	0.00506443
PRF5	Negative Regulation Of Immunoglobulin Production	Green	0.707882	2.89e-05	0.00525398
PRF5	Cd4 Positive Or Cd8 Positive Alpha Beta T Cell Lineage Commitment	Green	0.698522	4.03e-05	0.0054459
PRF5	Jak Stat Signaling Pathway	Green	0.697537	4.17e-05	0.0054459
PRF5	Regulation Of Insulin Receptor Signaling Pathway	Darkorange	0.695567	4.47e-05	0.00551389
PRF5	Regulation Of Insulin Receptor Signaling Pathway	Green	0.695567	4.47e-05	0.00551389
PRF5	1 Phosphatidylinositol 3 Kinase Regulator Activity	Darkorange	0.684236	6.57e-05	0.00604776
PRF5	T Helper Cell Lineage Commitment	Green	0.679803	7.6e-05	0.00619017
PRF5	T Cell Tolerance Induction	Green	0.67931	7.72e-05	0.00619017
PRF5	Regulation Of Ubiquitin Protein Ligase Activity	Yellow	-0.708374	2.84e-05	0.00525398
PRF5	Regulation Of Mitotic Cell Cycle Spindle Assembly Checkpoint	Yellow	-0.684236	6.57e-05	0.00604776
PRF5	Positive Regulation Of Meiotic Cell Cycle	Yellow	-0.651232	0.000184614	0.00700976
PRF5	Anaphase Promoting Complex	Yellow	-0.647783	0.000204247	0.00713725
PRF5	Positive Regulation Of Ubiquitin Protein Ligase Activity	Yellow	-0.597044	0.000793969	0.0113349
PRF5	Regulation Of Meiotic Nuclear Division	Yellow	-0.544335	0.00263285	0.019357
PRF5	Positive Regulation Of Chromosome Segregation	Yellow	-0.542857	0.00271579	0.0196475
PRF5	Regulation Of Meiotic Cell Cycle	Yellow	-0.535468	0.00316525	0.0212737
PRF5	Histone Exchange	Yellow	-0.52069	0.0042596	0.0247833
PRF5	Nuclear Ubiquitin Ligase Complex	Yellow	-0.518227	0.00447046	0.0254929
PRF6	Natural Killer Cell Differentiation	Green	0.764039	3.63e-06	0.00411137
PRF6	T Helper 17 Cell Differentiation	Green	0.728571	1.34e-05	0.00505555
PRF6	Negative Regulation Of Immunoglobulin Production	Green	0.715764	2.17e-05	0.00506443
PRF6	Cd4 Positive Or Cd8 Positive Alpha Beta T Cell Lineage Commitment	Green	0.704433	3.27e-05	0.0054459
PRF6	1 Phosphatidylinositol 3 Kinase Regulator Activity	Darkorange	0.69803	4.1e-05	0.0054459
PRF6	Phosphatidylinositol 3 Kinase Regulator Activity	Darkorange	0.690148	5.38e-05	0.00579726
PRF6	T Helper Cell Lineage Commitment	Green	0.677833	8.1e-05	0.00619017
PRF6	Jak Stat Signaling Pathway	Green	0.677833	8.1e-05	0.00619017
PRF6	T Helper 17 Type Immune Response	Green	0.673399	9.35e-05	0.00619017
PRF6	T Cell Tolerance Induction	Green	0.670443	0.000102684	0.00619017
PRF6	Regulation Of Ubiquitin Protein Ligase Activity	Yellow	-0.702463	3.51e-05	0.0054459
PRF6	Regulation Of Mitotic Cell Cycle Spindle Assembly Checkpoint	Yellow	-0.676847	8.37e-05	0.00619017
PRF6	Positive Regulation Of Meiotic Cell Cycle	Yellow	-0.652217	0.000179318	0.00694022
PRF6	Anaphase Promoting Complex	Yellow	-0.650739	0.000187313	0.00700976
PRF6	Positive Regulation Of Ubiquitin Protein Ligase Activity	Yellow	-0.614778	0.000506829	0.00951846
PRF6	Positive Regulation Of Chromosome Segregation	Yellow	-0.557143	0.00200109	0.0167165
PRF6	Regulation Of Meiotic Nuclear Division	Yellow	-0.553202	0.00217972	0.017491
PRF6	Regulation Of Meiotic Cell Cycle	Yellow	-0.550739	0.00229824	0.0180856
PRF6	Nuclear Ubiquitin Ligase Complex	Yellow	-0.543842	0.00266025	0.0194461
PRF6	Cytokinetic Process	Yellow	-0.529557	0.00356969	0.0226604
PRF7	Natural Killer Cell Differentiation	Green	0.764039	3.63e-06	0.00411137
PRF7	T Helper 17 Cell Differentiation	Green	0.728571	1.34e-05	0.00505555
PRF7	Negative Regulation Of Immunoglobulin Production	Green	0.715764	2.17e-05	0.00506443
PRF7	Cd4 Positive Or Cd8 Positive Alpha Beta T Cell Lineage Commitment	Green	0.704433	3.27e-05	0.0054459
PRF7	1 Phosphatidylinositol 3 Kinase Regulator Activity	Darkorange	0.69803	4.1e-05	0.0054459
PRF7	Phosphatidylinositol 3 Kinase Regulator Activity	Darkorange	0.690148	5.38e-05	0.00579726
PRF7	T Helper Cell Lineage Commitment	Green	0.677833	8.1e-05	0.00619017
PRF7	Jak Stat Signaling Pathway	Green	0.677833	8.1e-05	0.00619017
PRF7	T Helper 17 Type Immune Response	Green	0.673399	9.35e-05	0.00619017
PRF7	T Cell Tolerance Induction	Green	0.670443	0.000102684	0.00619017
PRF7	Regulation Of Ubiquitin Protein Ligase Activity	Yellow	-0.702463	3.51e-05	0.0054459
PRF7	Regulation Of Mitotic Cell Cycle Spindle Assembly Checkpoint	Yellow	-0.676847	8.37e-05	0.00619017
PRF7	Positive Regulation Of Meiotic Cell Cycle	Yellow	-0.652217	0.000179318	0.00694022
PRF7	Anaphase Promoting Complex	Yellow	-0.650739	0.000187313	0.00700976
PRF7	Positive Regulation Of Ubiquitin Protein Ligase Activity	Yellow	-0.614778	0.000506829	0.00951846
PRF7	Positive Regulation Of Chromosome Segregation	Yellow	-0.557143	0.00200109	0.0167165
PRF7	Regulation Of Meiotic Nuclear Division	Yellow	-0.553202	0.00217972	0.017491
PRF7	Regulation Of Meiotic Cell Cycle	Yellow	-0.550739	0.00229824	0.0180856
PRF7	Nuclear Ubiquitin Ligase Complex	Yellow	-0.543842	0.00266025	0.0194461
PRF7	Cytokinetic Process	Yellow	-0.529557	0.00356969	0.0226604
PRF8	Cd4 Positive Or Cd8 Positive Alpha Beta T Cell Lineage Commitment	Green	0.787685	1.91e-06	0.00411137
PRF8	T Helper Cell Lineage Commitment	Green	0.759606	4.22e-06	0.00411137
PRF8	T Helper 17 Cell Differentiation	Green	0.758128	4.44e-06	0.00411137
PRF8	Regulation Of Jnk Cascade	Green	0.738424	9.22e-06	0.00503081
PRF8	T Helper 17 Type Immune Response	Green	0.734975	1.05e-05	0.00503081
PRF8	T Cell Differentiation Involved In Immune Response	Green	0.727586	1.39e-05	0.00506443
PRF8	Natural Killer Cell Differentiation	Green	0.724631	1.56e-05	0.00506443
PRF8	Negative Regulation Of Immunoglobulin Production	Green	0.723153	1.65e-05	0.00506443
PRF8	T Cell Lineage Commitment	Green	0.72069	1.8e-05	0.00506443
PRF8	Positive T Cell Selection	Green	0.716256	2.13e-05	0.00506443
PRF8	Regulation Of Mitotic Cell Cycle Spindle Assembly Checkpoint	Yellow	-0.754187	5.11e-06	0.00433786
PRF8	Anaphase Promoting Complex	Yellow	-0.712808	2.42e-05	0.00521828
PRF8	Histone Exchange	Yellow	-0.699507	3.89e-05	0.0054459
PRF8	Positive Regulation Of Chromosome Segregation	Yellow	-0.673399	9.35e-05	0.00619017
PRF8	Regulation Of Ubiquitin Protein Ligase Activity	Yellow	-0.671921	9.8e-05	0.00619017
PRF8	Negative Regulation Of Metaphase Anaphase Transition Of Cell Cycle	Yellow	-0.662562	0.000131272	0.00627332
PRF8	Female Meiotic Nuclear Division	Yellow	-0.648276	0.000201335	0.00707906
PRF8	Metaphase Anaphase Transition Of Cell Cycle	Yellow	-0.64532	0.000219373	0.00722653
PRF8	Dna Replication	Yellow	-0.636453	0.000282287	0.00794855
PRF8	Regulation Of Chromosome Separation	Yellow	-0.635468	0.00029017	0.00801531
PRF9	Positive Regulation Of Interleukin 17 Production	Green	0.705419	3.16e-05	0.0054459
PRF9	Cd8 Positive Alpha Beta T Cell Differentiation	Green	0.684236	6.57e-05	0.00604776
PRF9	Cd8 Positive Alpha Beta T Cell Activation	Green	0.678818	7.85e-05	0.00619017
PRF9	Positive Regulation Of Cd4 Positive Alpha Beta T Cell Differentiation	Green	0.674877	8.92e-05	0.00619017
PRF9	Natural Killer Cell Proliferation	Green	0.672906	9.5e-05	0.00619017
PRF9	Cd4 Positive Or Cd8 Positive Alpha Beta T Cell Lineage Commitment	Green	0.670936	0.000101096	0.00619017
PRF9	Granulocyte Macrophage Colony Stimulating Factor Production	Green	0.666502	0.000116204	0.00627332
PRF9	Regulation Of Cd4 Positive Alpha Beta T Cell Differentiation	Green	0.66601	0.000118	0.00627332
PRF9	Regulation Of T Helper 17 Type Immune Response	Green	0.664532	0.000123536	0.00627332
PRF9	Cd4 Positive Alpha Beta T Cell Differentiation	Green	0.651724	0.000181949	0.00700211
PRF9	Positive Regulation Of Ubiquitin Protein Transferase Activity	Yellow	-0.595074	0.000833287	0.0115011
PRF9	Positive Regulation Of Ubiquitin Protein Ligase Activity	Yellow	-0.459606	0.0129003	0.0465316
PRF9	Anaphase Promoting Complex Dependent Catabolic Process	Yellow	-0.43399	0.0195112	0.0601832
PRF9	Spindle Elongation	Yellow	-0.418719	0.0246495	0.0702331
PRF9	Nuclear Ubiquitin Ligase Complex	Yellow	-0.415271	0.0259525	0.0727241
PRF9	Dna Replication Origin Binding	Yellow	-0.412808	0.0269175	0.0743739
PRF9	Mitotic Metaphase Plate Congression	Yellow	-0.408374	0.028729	0.0774552
PRF9	Dna Ligation	Yellow	-0.403941	0.0306394	0.080693
PRF9	Regulation Of Cyclin Dependent Protein Kinase Activity	Yellow	-0.39803	0.0333473	0.0854588
PRF9	Attachment Of Spindle Microtubules To Kinetochore	Yellow	-0.396059	0.0342922	0.0870584
PRF10	Positive Regulation Of Interleukin 17 Production	Green	0.784729	2.03e-06	0.00411137
PRF10	Positive Regulation Of Cd4 Positive Alpha Beta T Cell Differentiation	Green	0.759606	4.22e-06	0.00411137
PRF10	Cd8 Positive Alpha Beta T Cell Activation	Green	0.742365	7.94e-06	0.00503081
PRF10	Cd8 Positive Alpha Beta T Cell Differentiation	Green	0.737438	9.57e-06	0.00503081
PRF10	Granulocyte Macrophage Colony Stimulating Factor Production	Green	0.733498	1.11e-05	0.00503081
PRF10	Regulation Of Cd4 Positive Alpha Beta T Cell Differentiation	Green	0.733498	1.11e-05	0.00503081
PRF10	Positive Regulation Of Alpha Beta T Cell Differentiation	Green	0.707882	2.89e-05	0.00525398
PRF10	Interleukin 4 Production	Green	0.705419	3.16e-05	0.0054459
PRF10	Regulation Of Alpha Beta T Cell Differentiation	Green	0.703448	3.39e-05	0.0054459
PRF10	Cd4 Positive Alpha Beta T Cell Differentiation	Green	0.70197	3.57e-05	0.0054459
PRF10	Positive Regulation Of Ubiquitin Protein Transferase Activity	Yellow	-0.63202	0.000319302	0.00818683
PRF10	Anaphase Promoting Complex Dependent Catabolic Process	Yellow	-0.442365	0.0170948	0.0554254
PRF10	Nuclear Ubiquitin Ligase Complex	Yellow	-0.440394	0.0176396	0.0565166
PRF10	Positive Regulation Of Ubiquitin Protein Ligase Activity	Yellow	-0.428079	0.0213828	0.0638287
PRF10	Attachment Of Mitotic Spindle Microtubules To Kinetochore	Yellow	-0.417734	0.0250162	0.0709401
PRF10	Mitotic Metaphase Plate Congression	Yellow	-0.415271	0.0259525	0.0727241
PRF10	Nuclear Periphery	Yellow	-0.412808	0.0269175	0.0743739
PRF10	Spindle Elongation	Yellow	-0.408867	0.0285229	0.0771961
PRF10	Dna Replication Origin Binding	Yellow	-0.404433	0.0304221	0.080339
PRF10	Attachment Of Spindle Microtubules To Kinetochore	Yellow	-0.402956	0.0310778	0.0813006
PRF11	Anaphase Promoting Complex	Yellow	0.613793	0.000519978	0.00958852
PRF11	Positive Regulation Of Ubiquitin Protein Transferase Activity	Yellow	0.575862	0.00131497	0.0137919
PRF11	Regulation Of Ubiquitin Protein Ligase Activity	Yellow	0.529557	0.00356969	0.0226604
PRF11	Regulation Of Mitotic Cell Cycle Spindle Assembly Checkpoint	Yellow	0.523645	0.0040179	0.0240365
PRF11	Dna Polymerase Binding	Yellow	0.49064	0.00751581	0.033754
PRF11	Nuclear Ubiquitin Ligase Complex	Yellow	0.487192	0.00799859	0.0351014
PRF11	Positive Regulation Of Chromosome Segregation	Yellow	0.466995	0.0113888	0.0430074
PRF11	Intercellular Bridge	Yellow	0.465517	0.0116785	0.0437363
PRF11	Spindle Elongation	Yellow	0.462562	0.0122766	0.045162
PRF11	Regulation Of Cell Cycle Checkpoint	Yellow	0.44335	0.0168277	0.0548214
PRF11	Lipopolysaccharide Mediated Signaling Pathway	Green	-0.69803	4.1e-05	0.0054459
PRF11	Positive Regulation Of Osteoclast Differentiation	Green	-0.69803	4.1e-05	0.0054459
PRF11	T Helper 17 Type Immune Response	Green	-0.696059	4.39e-05	0.00551389
PRF11	T Helper 17 Cell Lineage Commitment	Green	-0.691133	5.2e-05	0.00579726
PRF11	Natural Killer Cell Differentiation	Green	-0.69064	5.29e-05	0.00579726
PRF11	T Cell Differentiation Involved In Immune Response	Green	-0.678818	7.85e-05	0.00619017
PRF11	Tumor Necrosis Factor Superfamily Cytokine Production	Green	-0.672906	9.5e-05	0.00619017
PRF11	Regulation Of Leukocyte Apoptotic Process	Green	-0.672414	9.65e-05	0.00619017
PRF11	Cellular Response To Biotic Stimulus	Green	-0.670936	0.000101096	0.00619017
PRF11	Positive Regulation Of Tumor Necrosis Factor Superfamily Cytokine Production	Green	-0.670443	0.000102684	0.00619017
PRF12	Regulation Of Ubiquitin Protein Ligase Activity	Yellow	0.692611	4.95e-05	0.00578932
PRF12	Anaphase Promoting Complex	Yellow	0.676355	8.5e-05	0.00619017
PRF12	Regulation Of Mitotic Cell Cycle Spindle Assembly Checkpoint	Yellow	0.650739	0.000187313	0.00700976
PRF12	Positive Regulation Of Ubiquitin Protein Transferase Activity	Yellow	0.581281	0.00115932	0.0131926
PRF12	Positive Regulation Of Ubiquitin Protein Ligase Activity	Yellow	0.575369	0.00132998	0.0139207
PRF12	Positive Regulation Of Chromosome Segregation	Yellow	0.568966	0.00153912	0.0148782
PRF12	Positive Regulation Of Meiotic Cell Cycle	Yellow	0.56798	0.00157371	0.0149989
PRF12	Nuclear Ubiquitin Ligase Complex	Yellow	0.542365	0.00274394	0.0197668
PRF12	Cytokinetic Process	Yellow	0.525123	0.00390154	0.0236462
PRF12	Regulation Of Meiotic Nuclear Division	Yellow	0.519212	0.00438507	0.0251894
PRF12	Natural Killer Cell Differentiation	Green	-0.815764	1.3e-06	0.00411137
PRF12	T Helper 17 Cell Differentiation	Green	-0.810837	1.36e-06	0.00411137
PRF12	T Helper 17 Type Immune Response	Green	-0.771921	2.83e-06	0.00411137
PRF12	Jak Stat Signaling Pathway	Green	-0.767488	3.25e-06	0.00411137
PRF12	T Helper Cell Lineage Commitment	Green	-0.760591	4.08e-06	0.00411137
PRF12	T Cell Differentiation Involved In Immune Response	Green	-0.746305	6.84e-06	0.00492913
PRF12	Cd4 Positive Or Cd8 Positive Alpha Beta T Cell Lineage Commitment	Green	-0.743842	7.51e-06	0.00492913
PRF12	Interleukin 6 Mediated Signaling Pathway	Green	-0.743842	7.51e-06	0.00492913
PRF12	Positive T Cell Selection	Green	-0.738916	9.05e-06	0.00503081
PRF12	Chemokine Binding	Green	-0.735468	1.03e-05	0.00503081
PRF13	Regulation Of Ubiquitin Protein Ligase Activity	Yellow	0.72069	1.8e-05	0.00506443
PRF13	Anaphase Promoting Complex	Yellow	0.691133	5.2e-05	0.00579726
PRF13	Regulation Of Mitotic Cell Cycle Spindle Assembly Checkpoint	Yellow	0.66601	0.000118	0.00627332
PRF13	Positive Regulation Of Meiotic Cell Cycle	Yellow	0.565025	0.00168155	0.0153926
PRF13	Positive Regulation Of Ubiquitin Protein Ligase Activity	Yellow	0.563054	0.00175697	0.0157293
PRF13	Positive Regulation Of Chromosome Segregation	Yellow	0.558621	0.00193746	0.0164345
PRF13	Cytokinetic Process	Yellow	0.552709	0.00220299	0.0176083
PRF13	Midbody Abscission	Yellow	0.551232	0.0022741	0.0179721
PRF13	Positive Regulation Of Metaphase Anaphase Transition Of Cell Cycle	Yellow	0.548276	0.0024223	0.0186228
PRF13	Dna Polymerase Binding	Yellow	0.530049	0.00353437	0.0225557
PRF13	T Helper 17 Cell Differentiation	Green	-0.799015	1.57e-06	0.00411137
PRF13	Jak Stat Signaling Pathway	Green	-0.784236	2.06e-06	0.00411137
PRF13	Natural Killer Cell Differentiation	Green	-0.771921	2.83e-06	0.00411137
PRF13	Interleukin 6 Mediated Signaling Pathway	Green	-0.756158	4.76e-06	0.00421697
PRF13	Response To Interleukin 6	Green	-0.744828	7.23e-06	0.00492913
PRF13	T Helper 17 Type Immune Response	Green	-0.737438	9.57e-06	0.00503081
PRF13	Osteoclast Differentiation	Green	-0.734483	1.07e-05	0.00503081
PRF13	Adipose Tissue Development	Darkorange	-0.730542	1.24e-05	0.00505555
PRF13	1 Phosphatidylinositol 3 Kinase Regulator Activity	Darkorange	-0.723645	1.62e-05	0.00506443
PRF13	Regulation Of Osteoclast Differentiation	Green	-0.723153	1.65e-05	0.00506443
PRF14	Positive Regulation Of Ubiquitin Protein Transferase Activity	Yellow	0.601478	0.00071137	0.0107673
PRF14	Regulation Of Mitotic Cell Cycle Spindle Assembly Checkpoint	Yellow	0.560591	0.00185535	0.0161484
PRF14	Anaphase Promoting Complex	Yellow	0.507882	0.00545697	0.0285366
PRF14	Dna Polymerase Binding	Yellow	0.504926	0.00577095	0.0292834
PRF14	Positive Regulation Of Ubiquitin Protein Ligase Activity	Yellow	0.501478	0.0061567	0.0302165
PRF14	Regulation Of Ubiquitin Protein Ligase Activity	Yellow	0.495567	0.00686931	0.0319428
PRF14	Dna Replication Origin Binding	Yellow	0.489655	0.00765114	0.0341284
PRF14	Mitotic Metaphase Plate Congression	Yellow	0.469458	0.0109194	0.0419351
PRF14	Nuclear Ubiquitin Ligase Complex	Yellow	0.464532	0.0118751	0.0442608
PRF14	Spindle Elongation	Yellow	0.460099	0.0127945	0.0463389
PRF14	Positive Regulation Of Lymphocyte Chemotaxis	Green	-0.751232	5.7e-06	0.00446024
PRF14	T Helper 17 Type Immune Response	Green	-0.737438	9.57e-06	0.00503081
PRF14	T Cell Differentiation Involved In Immune Response	Green	-0.736453	9.94e-06	0.00503081
PRF14	Cd4 Positive Or Cd8 Positive Alpha Beta T Cell Lineage Commitment	Green	-0.73399	1.09e-05	0.00503081
PRF14	Positive T Cell Selection	Green	-0.725123	1.53e-05	0.00506443
PRF14	Regulation Of Lymphocyte Chemotaxis	Green	-0.721675	1.74e-05	0.00506443
PRF14	Regulation Of T Helper 17 Type Immune Response	Green	-0.718227	1.98e-05	0.00506443
PRF14	Jak Stat Signaling Pathway	Green	-0.716256	2.13e-05	0.00506443
PRF14	T Helper 17 Cell Differentiation	Green	-0.714286	2.29e-05	0.00506443
PRF14	Cd8 Positive Alpha Beta T Cell Activation	Green	-0.711823	2.5e-05	0.00521828
PRF15	Regulation Of Ubiquitin Protein Ligase Activity	Yellow	0.684236	6.57e-05	0.00604776
PRF15	Regulation Of Mitotic Cell Cycle Spindle Assembly Checkpoint	Yellow	0.681773	7.12e-05	0.00619017
PRF15	Anaphase Promoting Complex	Yellow	0.623153	0.000406291	0.00900029
PRF15	Positive Regulation Of Meiotic Cell Cycle	Yellow	0.616256	0.000487649	0.0094011
PRF15	Regulation Of Meiotic Nuclear Division	Yellow	0.56798	0.00157371	0.0149989
PRF15	Positive Regulation Of Ubiquitin Protein Ligase Activity	Yellow	0.547291	0.00247352	0.0187825
PRF15	Positive Regulation Of Chromosome Segregation	Yellow	0.523645	0.0040179	0.0240365
PRF15	Histone Exchange	Yellow	0.514286	0.0048265	0.0264561
PRF15	Intercellular Bridge	Yellow	0.502463	0.0060443	0.0299246
PRF15	Negative Regulation Of Metaphase Anaphase Transition Of Cell Cycle	Yellow	0.50197	0.00610027	0.0300555
PRF15	Interleukin 6 Mediated Signaling Pathway	Green	-0.724138	1.59e-05	0.00506443
PRF15	Natural Killer Cell Differentiation	Green	-0.719212	1.91e-05	0.00506443
PRF15	T Helper 17 Cell Differentiation	Green	-0.718227	1.98e-05	0.00506443
PRF15	Jak Stat Signaling Pathway	Green	-0.716256	2.13e-05	0.00506443
PRF15	Regulation Of Insulin Receptor Signaling Pathway	Darkorange	-0.710837	2.6e-05	0.00521828
PRF15	Regulation Of Insulin Receptor Signaling Pathway	Green	-0.710837	2.6e-05	0.00521828
PRF15	Negative Regulation Of Immunoglobulin Production	Green	-0.710345	2.64e-05	0.00521828
PRF15	Response To Interleukin 6	Green	-0.710345	2.64e-05	0.00521828
PRF15	Regulation Of Keratinocyte Proliferation	Yellow	-0.703941	3.33e-05	0.0054459
PRF15	T Cell Tolerance Induction	Green	-0.702463	3.51e-05	0.0054459
PRF16	Regulation Of Mitotic Cell Cycle Spindle Assembly Checkpoint	Yellow	0.659113	0.000145843	0.00645338
PRF16	Regulation Of Ubiquitin Protein Ligase Activity	Yellow	0.623153	0.000406291	0.00900029
PRF16	Anaphase Promoting Complex	Yellow	0.591626	0.000906193	0.0119639
PRF16	Positive Regulation Of Meiotic Cell Cycle	Yellow	0.538916	0.0029481	0.020428
PRF16	Histone Exchange	Yellow	0.500985	0.00621356	0.0304003
PRF16	Intercellular Bridge	Yellow	0.498522	0.00650467	0.0311875
PRF16	Dna Polymerase Binding	Yellow	0.498522	0.00650467	0.0311875
PRF16	Positive Regulation Of Ubiquitin Protein Ligase Activity	Yellow	0.49803	0.00656427	0.031311
PRF16	Regulation Of Meiotic Nuclear Division	Yellow	0.49803	0.00656427	0.031311
PRF16	Positive Regulation Of Chromosome Segregation	Yellow	0.488177	0.00785803	0.0346789
PRF16	Natural Killer Cell Differentiation	Green	-0.7	3.83e-05	0.0054459
PRF16	Jak Stat Signaling Pathway	Green	-0.69064	5.29e-05	0.00579726
PRF16	T Helper 17 Cell Differentiation	Green	-0.6867	6.05e-05	0.00587551
PRF16	Interleukin 6 Mediated Signaling Pathway	Green	-0.681281	7.24e-05	0.00619017
PRF16	Regulation Of Keratinocyte Proliferation	Yellow	-0.672906	9.5e-05	0.00619017
PRF16	Negative Regulation Of Immunoglobulin Production	Green	-0.669951	0.000104294	0.00619017
PRF16	Adipose Tissue Development	Darkorange	-0.664532	0.000123536	0.00627332
PRF16	T Cell Tolerance Induction	Green	-0.663054	0.000129299	0.00627332
PRF16	Regulation Of Insulin Receptor Signaling Pathway	Darkorange	-0.662562	0.000131272	0.00627332
PRF16	Osteoclast Differentiation	Green	-0.662562	0.000131272	0.00627332
PRF17	Positive Regulation Of Meiotic Cell Cycle	Yellow	0.579803	0.00120009	0.0133142
PRF17	Regulation Of Meiotic Nuclear Division	Yellow	0.558128	0.00195847	0.0165095
PRF17	Midbody Abscission	Yellow	0.514778	0.00478071	0.0263327
PRF17	Positive Regulation Of Metaphase Anaphase Transition Of Cell Cycle	Yellow	0.514778	0.00478071	0.0263327
PRF17	Anaphase Promoting Complex Dependent Catabolic Process	Yellow	0.50936	0.00530554	0.0279892
PRF17	Regulation Of Ubiquitin Protein Ligase Activity	Yellow	0.500985	0.00621356	0.0304003
PRF17	Regulation Of Meiotic Cell Cycle	Yellow	0.499015	0.00644553	0.0310502
PRF17	Positive Regulation Of Ubiquitin Protein Ligase Activity	Yellow	0.485222	0.00828613	0.0358227
PRF17	Regulation Of Mitotic Cell Cycle Spindle Assembly Checkpoint	Yellow	0.475369	0.00985927	0.039302
PRF17	Anaphase Promoting Complex	Yellow	0.451724	0.0146954	0.0504754
PRF17	Positive Regulation Of Carbohydrate Metabolic Process	Darkorange	-0.59803	0.000774924	0.0111886
PRF17	Adipose Tissue Development	Darkorange	-0.57931	0.00121396	0.0133588
PRF17	Energy Homeostasis	Darkorange	-0.563054	0.00175697	0.0157293
PRF17	Positive Regulation Of Cellular Carbohydrate Metabolic Process	Darkorange	-0.541379	0.00280098	0.0199518
PRF17	Peptide Hormone Binding	Darkgreen	-0.525123	0.00390154	0.0236462
PRF17	Insulin Like Growth Factor Receptor Binding	Darkorange	-0.521182	0.00421847	0.0246214
PRF17	Positive Regulation Of Glucose Metabolic Process	Darkorange	-0.519212	0.00438507	0.0251894
PRF17	Hormone Binding	Darkgreen	-0.518719	0.00442759	0.0253407
PRF17	Positive Regulation Of Cold Induced Thermogenesis	Darkorange	-0.517734	0.0045137	0.0256676
PRF17	1 Phosphatidylinositol 3 Kinase Regulator Activity	Darkorange	-0.516749	0.00460124	0.0258906
PRF18	Regulation Of Meiotic Nuclear Division	Yellow	0.640394	0.000252602	0.00762979
PRF18	Positive Regulation Of Meiotic Cell Cycle	Yellow	0.616256	0.000487649	0.0094011
PRF18	Regulation Of Meiotic Cell Cycle	Yellow	0.555665	0.00206653	0.0169981
PRF18	Positive Regulation Of Nuclear Division	Yellow	0.527094	0.00375091	0.0232666
PRF18	Regulation Of Ubiquitin Protein Ligase Activity	Yellow	0.524138	0.00397878	0.0239291
PRF18	Midbody Abscission	Yellow	0.512315	0.00501346	0.0270225
PRF18	Exit From Mitosis	Yellow	0.498522	0.00650467	0.0311875
PRF18	Anaphase Promoting Complex	Yellow	0.4867	0.00806967	0.0353068
PRF18	Anaphase Promoting Complex Dependent Catabolic Process	Yellow	0.470936	0.0106458	0.0411949
PRF18	Regulation Of Mitotic Cell Cycle Spindle Assembly Checkpoint	Yellow	0.469458	0.0109194	0.0419351
PRF18	Positive Regulation Of Carbohydrate Metabolic Process	Darkorange	-0.634975	0.000294184	0.00806055
PRF18	Adipose Tissue Development	Darkorange	-0.625616	0.000380263	0.00873746
PRF18	Energy Homeostasis	Darkorange	-0.62069	0.000433866	0.00913407
PRF18	Positive Regulation Of Cellular Carbohydrate Metabolic Process	Darkorange	-0.56798	0.00157371	0.0149989
PRF18	Positive Regulation Of Glucose Metabolic Process	Darkorange	-0.565025	0.00168155	0.0153926
PRF18	Peptide Hormone Binding	Darkgreen	-0.551724	0.00225018	0.0178523
PRF18	Hormone Binding	Darkgreen	-0.550739	0.00229824	0.0180856
PRF18	Cellular Response To Peptide Hormone Stimulus	Darkorange	-0.544828	0.00260569	0.0192967
PRF18	Positive Regulation Of Cold Induced Thermogenesis	Darkorange	-0.538916	0.0029481	0.020428
PRF18	Cellular Response To Peptide	Green	-0.530049	0.00353437	0.0225557
