# Supplementary material for: Multi-View Radiomics Feature Fusion Reveals Distinct Immuno-Oncological Characteristics and Clinical Prognoses in Hepatocellular Carcinoma
Source: Cancers (Basel). 2023 Apr 17;15(8):2338. doi: 10.3390/cancers15082338 (PMC10137067; doi:10.3390/cancers15082338)
Supplement: Supplementary file 1 [file cancers-15-02338-s001.zip › Table S7.xlsx]

## Sheet: Sheet1
PRF	Correlated Gene	Module	Correlation	P.value	HR (95%CI)	Log-rank P
PRF1	IRS1	Darkorange	0.534	0.003	0.76 (0.54−1.07)	0.121
PRF2	TBX21	Green	0.592	0.001	0.62 (0.43−0.90)	0.006
PRF3	CCR7	Green	0.679	<0.001	0.57 (0.40−0.81)	0.001
PRF4	SLAMF6	Green	0.611	0.001	0.63 (0.44−0.89)	0.007
PRF5	IL6ST	Green	0.556	0.002	0.67 (0.46−0.97)	0.044
PRF6	SLAMF6	Green	0.595	0.001	0.63 (0.44−0.89)	0.007
PRF7	NFIL3	Green	0.577	0.001	0.83 (0.59−1.18)	0.304
PRF8	SPN	Green	0.518	0.004	0.76 (0.50−0.99)	0.048
PRF9	PRKCQ	Green	0.581	0.001	0.61 (0.43−0.86)	0.005
PRF10	LY9	Green	0.54	0.003	0.68 (0.48−0.96)	0.03
PRF11	CDC26	Yellow	0.578	0.001	1.83 (1.28−2.63)	0.001
PRF12	UBE2S	Yellow	0.662	<0.001	2.38 (1.64−3.43)	0.001
PRF13	BAG2	Yellow	0.6	0.001	1.75 (1.24−2.47)	0.001
PRF14	UBE2S	Yellow	0.527	0.004	2.38 (1.64−3.43)	0.001
PRF15	UBE2S	Yellow	0.623	<0.001	2.38 (1.64−3.43)	0.001
PRF16	MAD2L1BP	Yellow	0.539	0.003	1.78 (1.22−2.59)	0.008
PRF17	SIRT2	Yellow	0.486	0.008	1.36 (0.95−1.95)	0.084
PRF18	SIRT2	Yellow	0.584	0.001	1.36 (0.95−1.95)	0.084
