# Supplementary material for: Multi-View Radiomics Feature Fusion Reveals Distinct Immuno-Oncological Characteristics and Clinical Prognoses in Hepatocellular Carcinoma
Source: Cancers (Basel). 2023 Apr 17;15(8):2338. doi: 10.3390/cancers15082338 (PMC10137067; doi:10.3390/cancers15082338)
Supplement: Supplementary file 1 [file cancers-15-02338-s001.zip › Table S8.xlsx]

## Sheet: gene_list
signature genes list
gene	module
ADH1A	darkgreen
AFM	darkgreen
ALB	darkgreen
ANGPTL1	darkgreen
ANXA10	darkgreen
BCO2	darkgreen
C8orf4	darkgreen
CD1D	darkgreen
COLEC10	darkgreen
CRHBP	darkgreen
DNASE1L3	darkgreen
ELFN1	darkgreen
GADD45B	darkgreen
GHR	darkgreen
GNAO1	darkgreen
HPX	darkgreen
IFI27	darkgreen
NAAA	darkgreen
ORM2	darkgreen
RASGEF1B	darkgreen
SEC14L3	darkgreen
STEAP4	darkgreen
APOA5	darkorange
CYP2C8	darkorange
FOXO1	darkorange
GADD45G	darkorange
IRS1	darkorange
LDLR	darkorange
SLC1A1	darkorange
SLC25A25	darkorange
SOCS2	darkorange
TOB1	darkorange
TSC22D3	darkorange
ADAMTS10	green
ATP2A3	green
C16orf54	green
CCL18	green
CCL3	green
CCL4	green
CCL4L1	green
CCL5	green
CCR2	green
CCR5	green
CCR7	green
CD2	green
CD247	green
CD38	green
CD3E	green
CD5	green
CD79A	green
CD8A	green
CD8B	green
CHI3L1	green
CST7	green
CXCL12	green
CXCL14	green
CXCL9	green
CXCR6	green
DIRAS3	green
DOCK8	green
DUSP2	green
FCRL6	green
GBP5	green
GP1BA	green
GPR171	green
GZMA	green
GZMK	green
HLA-DRB5	green
IGJ	green
IGLL5	green
IL18RAP	green
IL6ST	green
IL7R	green
IRF4	green
IRF8	green
ITGA4	green
ITK	green
ITM2A	green
KCNAB2	green
KRT5	green
LAX1	green
LY9	green
MDFIC	green
MZB1	green
NKG7	green
P2RY13	green
PARP15	green
PBX1	green
PLA2G2D	green
PLEK	green
PRKCQ	green
PTGER2	green
PYHIN1	green
RASGRF1	green
RGS16	green
RUNX3	green
SERPINA7	green
SH2D1A	green
SIRPG	green
SIT1	green
SLAMF6	green
SLAMF7	green
SMPD3	green
SOCS3	green
SPN	green
TBX21	green
TIGIT	green
TMEM154	green
TNFRSF17	green
TRIM22	green
UST	green
ZAP70	green
ABCC4	red
ACAA2	red
ACSL1	red
ADH4	red
ALDOB	red
ALPK2	red
ANG	red
C21orf91	red
C8A	red
CDA	red
CKMT2	red
CREB3L3	red
ESR1	red
FBXL16	red
FBXO2	red
FNDC5	red
GPR128	red
GPR88	red
GREM2	red
HDC	red
HMGCS2	red
KLF10	red
LIPG	red
MAMDC4	red
MT1E	red
PLG	red
PLIN4	red
PROL1	red
RDH16	red
SERPINA11	red
SGK1	red
SYNE1	red
UGT2B15	red
UPP2	red
AP1M2	yellow
BAG2	yellow
C11orf84	yellow
C12orf75	yellow
CACYBP	yellow
CCNB1	yellow
CCNB2	yellow
CDC26	yellow
CDK1	yellow
CDKN3	yellow
CDT1	yellow
CENPM	yellow
CENPW	yellow
CLDN4	yellow
GINS2	yellow
GNAZ	yellow
GPC3	yellow
HMGA1	yellow
HSPA1B	yellow
HSPB1	yellow
IGF2BP2	yellow
KIAA0101	yellow
KIFC1	yellow
LRRC1	yellow
MAD2L1BP	yellow
MYBL2	yellow
NUDT1	yellow
PTTG1	yellow
SIRT2	yellow
SLC26A6	yellow
TACC3	yellow
TMEM54	yellow
UBE2C	yellow
UBE2S	yellow
UBE2T	yellow
UCK2	yellow
VIL1	yellow

## Sheet: green enrich
Enrichment result of signature genes in green module
ONTOLOGY	ID	Description	GeneRatio	BgRatio	pvalue	p.adjust	qvalue	geneID	Count
BP	GO:0042110	T cell activation	25/74	464/18670	4.59983e-22	7.49772e-19	5.34064e-19	RUNX3/CD2/CD3E/CD5/CD8A/CD8B/CCR7/IL6ST/IL7R/IRF4/ITK/LY9/PRKCQ/CCL5/SPN/ZAP70/PLA2G2D/SIT1/TBX21/LAX1/SIRPG/DOCK8/SLAMF6/TIGIT/CCR2	25
BP	GO:0050863	regulation of T cell activation	20/74	314/18670	4.6443e-19	2.69538e-16	1.91992e-16	RUNX3/CD2/CD3E/CD5/CCR7/IL6ST/IL7R/IRF4/PRKCQ/CCL5/SPN/ZAP70/PLA2G2D/SIT1/TBX21/LAX1/SIRPG/DOCK8/TIGIT/CCR2	20
BP	GO:0051249	regulation of lymphocyte activation	23/74	485/18670	4.96082e-19	2.69538e-16	1.91992e-16	RUNX3/CD2/CD3E/CD5/CD38/CCR7/IL6ST/IL7R/IRF4/PRKCQ/CCL5/SPN/ZAP70/PLA2G2D/SIT1/TBX21/MZB1/LAX1/SIRPG/DOCK8/TIGIT/CCR2/IGLL5	23
BP	GO:1903037	regulation of leukocyte cell-cell adhesion	19/74	304/18670	5.73844e-18	2.33841e-15	1.66566e-15	RUNX3/CD3E/CD5/CCR7/IL6ST/IL7R/ITGA4/PRKCQ/CCL5/CXCL12/SPN/ZAP70/PLA2G2D/TBX21/LAX1/SIRPG/DOCK8/TIGIT/CCR2	19
BP	GO:0072676	lymphocyte migration	14/74	111/18670	1.00299e-17	3.26975e-15	2.32905e-15	CCR7/ITGA4/CCL3/CCL4/CCL5/CCL18/CXCL12/SPN/ZAP70/CXCL14/TBX21/DOCK8/CCL4L1/CCR2	14
BP	GO:0007159	leukocyte cell-cell adhesion	19/74	337/18670	3.9202e-17	1.06499e-14	7.58594e-15	RUNX3/CD3E/CD5/CCR7/IL6ST/IL7R/ITGA4/PRKCQ/CCL5/CXCL12/SPN/ZAP70/PLA2G2D/TBX21/LAX1/SIRPG/DOCK8/TIGIT/CCR2	19
BP	GO:0022407	regulation of cell-cell adhesion	19/74	403/18670	1.05883e-15	2.46556e-13	1.75622e-13	RUNX3/CD3E/CD5/CCR7/IL6ST/IL7R/ITGA4/PRKCQ/CCL5/CXCL12/SPN/ZAP70/PLA2G2D/TBX21/LAX1/SIRPG/DOCK8/TIGIT/CCR2	19
BP	GO:0030098	lymphocyte differentiation	18/74	353/18670	1.7196e-15	3.50369e-13	2.49568e-13	RUNX3/CD2/CD3E/CD8A/CD79A/CCR7/IL7R/IRF4/ITGA4/ITK/LY9/SPN/ZAP70/ITM2A/PLA2G2D/TBX21/SLAMF6/CCR2	18
BP	GO:1990868	response to chemokine	12/74	97/18670	3.22779e-15	5.2613e-13	3.74764e-13	CCR5/CCR7/CXCL9/CCL3/CCL4/CCL5/CCL18/CXCL12/CXCR6/DOCK8/CCL4L1/CCR2	12
BP	GO:1990869	cellular response to chemokine	12/74	97/18670	3.22779e-15	5.2613e-13	3.74764e-13	CCR5/CCR7/CXCL9/CCL3/CCL4/CCL5/CCL18/CXCL12/CXCR6/DOCK8/CCL4L1/CCR2	12
BP	GO:0050867	positive regulation of cell activation	18/74	394/18670	1.15649e-14	1.71371e-12	1.22068e-12	RUNX3/CD2/CD3E/CD5/CD38/CCR7/IL6ST/IL7R/PLEK/PRKCQ/CCL3/CCL5/ZAP70/TBX21/SIRPG/DOCK8/CCR2/IGLL5	18
BP	GO:2000403	positive regulation of lymphocyte migration	9/74	37/18670	1.66113e-14	2.25636e-12	1.60721e-12	ITGA4/CCL3/CCL4/CCL5/CXCL12/SPN/CXCL14/DOCK8/CCR2	9
BP	GO:0030217	T cell differentiation	15/74	240/18670	2.59481e-14	3.25349e-12	2.31747e-12	RUNX3/CD2/CD3E/CD8A/CCR7/IL7R/IRF4/ITK/LY9/SPN/ZAP70/PLA2G2D/TBX21/SLAMF6/CCR2	15
BP	GO:0070098	chemokine-mediated signaling pathway	11/74	88/18670	4.39004e-14	5.11126e-12	3.64076e-12	CCR5/CCR7/CXCL9/CCL3/CCL4/CCL5/CCL18/CXCL12/CXCR6/CCL4L1/CCR2	11
BP	GO:0050900	leukocyte migration	19/74	499/18670	5.07229e-14	5.51189e-12	3.92613e-12	CD2/CCR5/CCR7/ITGA4/CXCL9/CCL3/CCL4/CCL5/CCL18/CXCL12/SPN/ZAP70/CXCL14/TBX21/SIRPG/SMPD3/DOCK8/CCL4L1/CCR2	19
BP	GO:0002696	positive regulation of leukocyte activation	17/74	380/18670	9.86158e-14	1.00465e-11	7.15614e-12	RUNX3/CD2/CD3E/CD5/CD38/CCR7/IL6ST/IL7R/PRKCQ/CCL3/CCL5/ZAP70/TBX21/SIRPG/DOCK8/CCR2/IGLL5	17
BP	GO:0046631	alpha-beta T cell activation	12/74	138/18670	2.42944e-13	2.32941e-11	1.65924e-11	RUNX3/CD3E/IRF4/ITK/LY9/PRKCQ/SPN/ZAP70/PLA2G2D/TBX21/SLAMF6/CCR2	12
BP	GO:2000401	regulation of lymphocyte migration	9/74	63/18670	2.91238e-12	2.51174e-10	1.78912e-10	ITGA4/CCL3/CCL4/CCL5/CXCL12/SPN/CXCL14/DOCK8/CCR2	9
BP	GO:1903039	positive regulation of leukocyte cell-cell adhesion	13/74	218/18670	2.9278e-12	2.51174e-10	1.78912e-10	RUNX3/CD3E/CD5/CCR7/IL6ST/IL7R/ITGA4/PRKCQ/CCL5/ZAP70/SIRPG/DOCK8/CCR2	13
BP	GO:0051251	positive regulation of lymphocyte activation	15/74	334/18670	3.16259e-12	2.57751e-10	1.83597e-10	RUNX3/CD3E/CD5/CD38/CCR7/IL6ST/IL7R/PRKCQ/CCL5/ZAP70/TBX21/SIRPG/DOCK8/CCR2/IGLL5	15
BP	GO:0045058	T cell selection	8/74	47/18670	1.14656e-11	8.8995e-10	6.33913e-10	CD3E/CCR7/IRF4/LY9/SPN/ZAP70/TBX21/SLAMF6	8
BP	GO:0022409	positive regulation of cell-cell adhesion	13/74	255/18670	2.11729e-11	1.56872e-09	1.1174e-09	RUNX3/CD3E/CD5/CCR7/IL6ST/IL7R/ITGA4/PRKCQ/CCL5/ZAP70/SIRPG/DOCK8/CCR2	13
BP	GO:0050870	positive regulation of T cell activation	12/74	202/18670	2.26167e-11	1.60283e-09	1.1417e-09	RUNX3/CD3E/CD5/CCR7/IL6ST/IL7R/PRKCQ/CCL5/ZAP70/SIRPG/DOCK8/CCR2	12
BP	GO:0046651	lymphocyte proliferation	13/74	272/18670	4.7434e-11	3.22156e-09	2.29472e-09	CD3E/CD38/CD79A/IL6ST/IL7R/PRKCQ/CCL5/SPN/ZAP70/PLA2G2D/MZB1/DOCK8/CCR2	13
BP	GO:0032943	mononuclear cell proliferation	13/74	274/18670	5.19667e-11	3.38823e-09	2.41344e-09	CD3E/CD38/CD79A/IL6ST/IL7R/PRKCQ/CCL5/SPN/ZAP70/PLA2G2D/MZB1/DOCK8/CCR2	13
BP	GO:0043368	positive T cell selection	7/74	34/18670	5.67467e-11	3.55758e-09	2.53407e-09	CD3E/IRF4/LY9/SPN/ZAP70/TBX21/SLAMF6	7
BP	GO:0002687	positive regulation of leukocyte migration	10/74	128/18670	7.96564e-11	4.80889e-09	3.42538e-09	CCR7/ITGA4/CCL3/CCL4/CCL5/CXCL12/SPN/CXCL14/DOCK8/CCR2	10
BP	GO:0071346	cellular response to interferon-gamma	11/74	180/18670	1.21466e-10	7.07105e-09	5.03672e-09	HLA-DRB5/IRF8/IRF4/CCL3/CCL4/CCL5/CCL18/SOCS3/TRIM22/GBP5/CCL4L1	11
BP	GO:0070661	leukocyte proliferation	13/74	298/18670	1.47249e-10	8.27641e-09	5.89531e-09	CD3E/CD38/CD79A/IL6ST/IL7R/PRKCQ/CCL5/SPN/ZAP70/PLA2G2D/MZB1/DOCK8/CCR2	13
BP	GO:0072678	T cell migration	8/74	65/18670	1.73891e-10	9.4481e-09	6.72991e-09	ITGA4/CCL3/CCL5/CXCL12/SPN/ZAP70/DOCK8/CCR2	8
BP	GO:0060326	cell chemotaxis	13/74	304/18670	1.88324e-10	9.90219e-09	7.05335e-09	CCR5/CCR7/CXCL9/PRKCQ/CCL3/CCL4/CCL5/CCL18/CXCL12/CXCL14/CXCR6/CCL4L1/CCR2	13
BP	GO:0046632	alpha-beta T cell differentiation	9/74	101/18670	2.2804e-10	1.16158e-08	8.27395e-09	RUNX3/IRF4/ITK/LY9/SPN/ZAP70/PLA2G2D/TBX21/SLAMF6	9
BP	GO:0002685	regulation of leukocyte migration	11/74	196/18670	3.02612e-10	1.49472e-08	1.06469e-08	CCR7/ITGA4/CCL3/CCL4/CCL5/CXCL12/SPN/CXCL14/SMPD3/DOCK8/CCR2	11
BP	GO:0001819	positive regulation of cytokine production	15/74	464/18670	3.24138e-10	1.55396e-08	1.10689e-08	CD2/CD3E/CCR7/IRF8/IL6ST/IRF4/LY9/PRKCQ/CCL3/SPN/SLAMF6/GBP5/PYHIN1/TIGIT/CCR2	15
BP	GO:0034341	response to interferon-gamma	11/74	199/18670	3.55877e-10	1.65737e-08	1.18055e-08	HLA-DRB5/IRF8/IRF4/CCL3/CCL4/CCL5/CCL18/SOCS3/TRIM22/GBP5/CCL4L1	11
BP	GO:0045785	positive regulation of cell adhesion	14/74	403/18670	5.35421e-10	2.42427e-08	1.72681e-08	RUNX3/CD3E/CD5/CCR7/IL6ST/IL7R/ITGA4/PRKCQ/CCL5/CXCL12/ZAP70/SIRPG/DOCK8/CCR2	14
BP	GO:0032609	interferon-gamma production	9/74	113/18670	6.27774e-10	2.73164e-08	1.94576e-08	CD2/CD3E/CCR7/IRF8/ITK/SPN/IL18RAP/SLAMF6/CCR2	9
BP	GO:2000107	negative regulation of leukocyte apoptotic process	7/74	47/18670	6.36825e-10	2.73164e-08	1.94576e-08	CCR5/CCR7/IL7R/PRKCQ/CCL5/CXCL12/DOCK8	7
BP	GO:0030595	leukocyte chemotaxis	11/74	224/18670	1.2493e-09	5.22143e-08	3.71924e-08	CCR5/CCR7/CXCL9/CCL3/CCL4/CCL5/CCL18/CXCL12/CXCL14/CCL4L1/CCR2	11
BP	GO:2000406	positive regulation of T cell migration	6/74	31/18670	2.14619e-09	8.74571e-08	6.22959e-08	ITGA4/CCL5/CXCL12/SPN/DOCK8/CCR2	6
BP	GO:0035710	CD4-positive, alpha-beta T cell activation	8/74	92/18670	2.94532e-09	1.17094e-07	8.34065e-08	RUNX3/IRF4/LY9/PRKCQ/SPN/PLA2G2D/TBX21/SLAMF6	8
BP	GO:0002295	T-helper cell lineage commitment	5/74	16/18670	3.59998e-09	1.39714e-07	9.95184e-08	IRF4/LY9/SPN/TBX21/SLAMF6	5
BP	GO:0043373	CD4-positive, alpha-beta T cell lineage commitment	5/74	17/18670	5.08427e-09	1.92729e-07	1.37282e-07	IRF4/LY9/SPN/TBX21/SLAMF6	5
BP	GO:0048247	lymphocyte chemotaxis	7/74	64/18670	5.96274e-09	2.20893e-07	1.57342e-07	CCL3/CCL4/CCL5/CCL18/CXCL14/CCL4L1/CCR2	7
BP	GO:0002548	monocyte chemotaxis	7/74	65/18670	6.6614e-09	2.41291e-07	1.71872e-07	CCL3/CCL4/CCL5/CCL18/CXCL12/CCL4L1/CCR2	7
BP	GO:0050670	regulation of lymphocyte proliferation	10/74	208/18670	9.16354e-09	3.24708e-07	2.3129e-07	CD3E/CD38/IL6ST/PRKCQ/CCL5/SPN/ZAP70/PLA2G2D/MZB1/CCR2	10
BP	GO:0002363	alpha-beta T cell lineage commitment	5/74	19/18670	9.49522e-09	3.25792e-07	2.32063e-07	IRF4/LY9/SPN/TBX21/SLAMF6	5
BP	GO:0032944	regulation of mononuclear cell proliferation	10/74	209/18670	9.59389e-09	3.25792e-07	2.32063e-07	CD3E/CD38/IL6ST/PRKCQ/CCL5/SPN/ZAP70/PLA2G2D/MZB1/CCR2	10
BP	GO:0043369	CD4-positive or CD8-positive, alpha-beta T cell lineage commitment	5/74	20/18670	1.26213e-08	4.19852e-07	2.99062e-07	IRF4/LY9/SPN/TBX21/SLAMF6	5
BP	GO:0140131	positive regulation of lymphocyte chemotaxis	5/74	21/18670	1.65145e-08	5.34784e-07	3.80928e-07	CCL3/CCL4/CCL5/CXCL14/CCR2	5
BP	GO:0043367	CD4-positive, alpha-beta T cell differentiation	7/74	74/18670	1.67384e-08	5.34784e-07	3.80928e-07	RUNX3/IRF4/LY9/SPN/PLA2G2D/TBX21/SLAMF6	7
BP	GO:0070663	regulation of leukocyte proliferation	10/74	222/18670	1.70606e-08	5.34784e-07	3.80928e-07	CD3E/CD38/IL6ST/PRKCQ/CCL5/SPN/ZAP70/PLA2G2D/MZB1/CCR2	10
BP	GO:2000404	regulation of T cell migration	6/74	44/18670	1.9757e-08	6.07622e-07	4.32811e-07	ITGA4/CCL5/CXCL12/SPN/DOCK8/CCR2	6
BP	GO:0002683	negative regulation of immune system process	13/74	463/18670	2.99711e-08	9.04683e-07	6.44408e-07	RUNX3/IL7R/IRF4/CCL3/CXCL12/SPN/CST7/PLA2G2D/GPR171/TBX21/LAX1/TIGIT/CCR2	13
BP	GO:2000106	regulation of leukocyte apoptotic process	7/74	83/18670	3.75403e-08	1.11256e-06	7.92477e-07	CCR5/CCR7/IL7R/PRKCQ/CCL5/CXCL12/DOCK8	7
BP	GO:0050851	antigen receptor-mediated signaling pathway	11/74	316/18670	4.44322e-08	1.29329e-06	9.21217e-07	CD3E/CD247/CD38/CD79A/CCR7/HLA-DRB5/ITK/PRKCQ/ZAP70/LAX1/IGLL5	11
BP	GO:0042098	T cell proliferation	9/74	184/18670	4.5929e-08	1.31341e-06	9.35544e-07	CD3E/IL6ST/PRKCQ/CCL5/SPN/ZAP70/PLA2G2D/DOCK8/CCR2	9
BP	GO:0002690	positive regulation of leukocyte chemotaxis	7/74	87/18670	5.21731e-08	1.4523e-06	1.03448e-06	CCR7/CCL3/CCL4/CCL5/CXCL12/CXCL14/CCR2	7
BP	GO:0002360	T cell lineage commitment	5/74	26/18670	5.2568e-08	1.4523e-06	1.03448e-06	IRF4/LY9/SPN/TBX21/SLAMF6	5
BP	GO:0006968	cellular defense response	6/74	53/18670	6.24718e-08	1.69091e-06	1.20444e-06	CCR5/ITK/SH2D1A/CXCL9/SPN/CCR2	6
BP	GO:0036336	dendritic cell migration	5/74	27/18670	6.43167e-08	1.69091e-06	1.20444e-06	CCR5/CCR7/CCL5/DOCK8/CCR2	5
BP	GO:1901623	regulation of lymphocyte chemotaxis	5/74	27/18670	6.43167e-08	1.69091e-06	1.20444e-06	CCL3/CCL4/CCL5/CXCL14/CCR2	5
BP	GO:0071674	mononuclear cell migration	7/74	90/18670	6.60826e-08	1.70976e-06	1.21786e-06	CCL3/CCL4/CCL5/CCL18/CXCL12/CCL4L1/CCR2	7
BP	GO:0035747	natural killer cell chemotaxis	4/74	11/18670	7.34666e-08	1.8711e-06	1.33279e-06	CCL3/CCL4/CCL5/CXCL14	4
BP	GO:0046634	regulation of alpha-beta T cell activation	7/74	93/18670	8.30051e-08	2.08151e-06	1.48267e-06	RUNX3/CD3E/IRF4/PRKCQ/ZAP70/TBX21/CCR2	7
BP	GO:0072538	T-helper 17 type immune response	5/74	29/18670	9.40293e-08	2.32224e-06	1.65414e-06	IRF4/LY9/PRKCQ/TBX21/SLAMF6	5
BP	GO:0072540	T-helper 17 cell lineage commitment	4/74	12/18670	1.09869e-07	2.67294e-06	1.90394e-06	IRF4/LY9/TBX21/SLAMF6	4
BP	GO:0097529	myeloid leukocyte migration	9/74	210/18670	1.42554e-07	3.41711e-06	2.43402e-06	CCR7/CXCL9/CCL3/CCL4/CCL5/CCL18/CXCL12/CCL4L1/CCR2	9
BP	GO:0032623	interleukin-2 production	6/74	62/18670	1.62645e-07	3.84221e-06	2.73681e-06	CD3E/CD247/IRF4/PRKCQ/TBX21/CCR2	6
BP	GO:0002460	adaptive immune response based on somatic recombination of immune receptors built from immunoglobulin superfamily domains	11/74	361/18670	1.70705e-07	3.97499e-06	2.83139e-06	CD8A/IL7R/IRF4/LY9/PRKCQ/SPN/IL18RAP/TBX21/SLAMF6/CCR2/IGLL5	11
BP	GO:0030593	neutrophil chemotaxis	7/74	104/18670	1.79799e-07	4.07045e-06	2.89939e-06	CCR7/CXCL9/CCL3/CCL4/CCL5/CCL18/CCL4L1	7
BP	GO:0071887	leukocyte apoptotic process	7/74	104/18670	1.79799e-07	4.07045e-06	2.89939e-06	CCR5/CCR7/IL7R/PRKCQ/CCL5/CXCL12/DOCK8	7
BP	GO:0042129	regulation of T cell proliferation	8/74	156/18670	1.87469e-07	4.18595e-06	2.98166e-06	CD3E/IL6ST/PRKCQ/CCL5/SPN/ZAP70/PLA2G2D/CCR2	8
BP	GO:0019722	calcium-mediated signaling	9/74	218/18670	1.95875e-07	4.31455e-06	3.07327e-06	CD3E/CCR5/CCR7/PLEK/CCL3/CCL4/ZAP70/CXCR6/CCR2	9
BP	GO:0002688	regulation of leukocyte chemotaxis	7/74	114/18670	3.37476e-07	7.33448e-06	5.22437e-06	CCR7/CCL3/CCL4/CCL5/CXCL12/CXCL14/CCR2	7
BP	GO:0042113	B cell activation	10/74	310/18670	3.86995e-07	8.30002e-06	5.91212e-06	CD38/CD79A/IL7R/ITGA4/ZAP70/ITM2A/TBX21/MZB1/LAX1/IGLL5	10
BP	GO:1990266	neutrophil migration	7/74	118/18670	4.2701e-07	9.0393e-06	6.43872e-06	CCR7/CXCL9/CCL3/CCL4/CCL5/CCL18/CCL4L1	7
BP	GO:0002695	negative regulation of leukocyte activation	8/74	175/18670	4.51812e-07	9.44171e-06	6.72535e-06	RUNX3/SPN/CST7/PLA2G2D/TBX21/LAX1/TIGIT/CCR2	8
BP	GO:0032103	positive regulation of response to external stimulus	10/74	323/18670	5.63585e-07	1.1538e-05	8.21851e-06	CCR7/IL6ST/CCL3/CCL4/CCL5/CCL18/CXCL12/CXCL14/GBP5/CCR2	10
BP	GO:0071621	granulocyte chemotaxis	7/74	123/18670	5.6628e-07	1.1538e-05	8.21851e-06	CCR7/CXCL9/CCL3/CCL4/CCL5/CCL18/CCL4L1	7
BP	GO:0070233	negative regulation of T cell apoptotic process	4/74	18/18670	6.67068e-07	1.34237e-05	9.56175e-06	IL7R/PRKCQ/CCL5/DOCK8	4
BP	GO:1903038	negative regulation of leukocyte cell-cell adhesion	7/74	129/18670	7.81991e-07	1.55445e-05	1.10723e-05	RUNX3/CXCL12/SPN/PLA2G2D/TBX21/LAX1/TIGIT	7
BP	GO:0050671	positive regulation of lymphocyte proliferation	7/74	130/18670	8.239e-07	1.61802e-05	1.15252e-05	CD3E/CD38/IL6ST/PRKCQ/CCL5/ZAP70/CCR2	7
BP	GO:0032946	positive regulation of mononuclear cell proliferation	7/74	131/18670	8.67678e-07	1.68371e-05	1.19931e-05	CD3E/CD38/IL6ST/PRKCQ/CCL5/ZAP70/CCR2	7
BP	GO:0050921	positive regulation of chemotaxis	7/74	135/18670	1.06284e-06	2.03814e-05	1.45177e-05	CCR7/CCL3/CCL4/CCL5/CXCL12/CXCL14/CCR2	7
BP	GO:0019932	second-messenger-mediated signaling	11/74	439/18670	1.18221e-06	2.23822e-05	1.59429e-05	CD3E/CCR5/CCR7/CXCL9/PLEK/PTGER2/CCL3/CCL4/ZAP70/CXCR6/CCR2	11
BP	GO:0050866	negative regulation of cell activation	8/74	199/18670	1.19463e-06	2.23822e-05	1.59429e-05	RUNX3/SPN/CST7/PLA2G2D/TBX21/LAX1/TIGIT/CCR2	8
BP	GO:0048245	eosinophil chemotaxis	4/74	21/18670	1.29301e-06	2.34274e-05	1.66874e-05	CCL3/CCL4/CCL5/CCL4L1	4
BP	GO:0045580	regulation of T cell differentiation	7/74	139/18670	1.29354e-06	2.34274e-05	1.66874e-05	RUNX3/CD2/IL7R/IRF4/ZAP70/TBX21/CCR2	7
BP	GO:0070665	positive regulation of leukocyte proliferation	7/74	139/18670	1.29354e-06	2.34274e-05	1.66874e-05	CD3E/CD38/IL6ST/PRKCQ/CCL5/ZAP70/CCR2	7
BP	GO:0097530	granulocyte migration	7/74	141/18670	1.42377e-06	2.55026e-05	1.81656e-05	CCR7/CXCL9/CCL3/CCL4/CCL5/CCL18/CCL4L1	7
BP	GO:0006874	cellular calcium ion homeostasis	11/74	458/18670	1.78458e-06	3.16181e-05	2.25217e-05	ATP2A3/CD38/CCR5/CCR7/CXCL9/PTGER2/CCL3/CCL5/CXCL12/CXCR6/CCR2	11
BP	GO:0042102	positive regulation of T cell proliferation	6/74	95/18670	2.07424e-06	3.6355e-05	2.58957e-05	CD3E/IL6ST/PRKCQ/CCL5/ZAP70/CCR2	6
BP	GO:0002407	dendritic cell chemotaxis	4/74	24/18670	2.2751e-06	3.94512e-05	2.81011e-05	CCR5/CCR7/CCL5/CCR2	4
BP	GO:0032663	regulation of interleukin-2 production	5/74	54/18670	2.31844e-06	3.97121e-05	2.8287e-05	CD3E/IRF4/PRKCQ/TBX21/CCR2	5
BP	GO:0055074	calcium ion homeostasis	11/74	471/18670	2.33887e-06	3.97121e-05	2.8287e-05	ATP2A3/CD38/CCR5/CCR7/CXCL9/PTGER2/CCL3/CCL5/CXCL12/CXCR6/CCR2	11
BP	GO:0002429	immune response-activating cell surface receptor signaling pathway	11/74	473/18670	2.43637e-06	4.09411e-05	2.91624e-05	CD3E/CD247/CD38/CD79A/CCR7/HLA-DRB5/ITK/PRKCQ/ZAP70/LAX1/IGLL5	11
BP	GO:1903706	regulation of hemopoiesis	11/74	475/18670	2.53742e-06	4.2204e-05	3.0062e-05	RUNX3/CD2/GP1BA/IL7R/IRF4/PRKCQ/CCL3/ZAP70/GPR171/TBX21/CCR2	11
BP	GO:0050901	leukocyte tethering or rolling	4/74	25/18670	2.70034e-06	4.40155e-05	3.13523e-05	ITGA4/CXCL12/SPN/CCR2	4
BP	GO:0072677	eosinophil migration	4/74	25/18670	2.70034e-06	4.40155e-05	3.13523e-05	CCL3/CCL4/CCL5/CCL4L1	4
BP	GO:0032649	regulation of interferon-gamma production	6/74	101/18670	2.96855e-06	4.79083e-05	3.41252e-05	CD2/CD3E/CCR7/IRF8/SLAMF6/CCR2	6
BP	GO:0072539	T-helper 17 cell differentiation	4/74	26/18670	3.18175e-06	5.08456e-05	3.62174e-05	IRF4/LY9/TBX21/SLAMF6	4
BP	GO:0042093	T-helper cell differentiation	5/74	58/18670	3.31805e-06	5.2509e-05	3.74022e-05	IRF4/LY9/SPN/TBX21/SLAMF6	5
BP	GO:0072503	cellular divalent inorganic cation homeostasis	11/74	493/18670	3.62596e-06	5.68299e-05	4.04801e-05	ATP2A3/CD38/CCR5/CCR7/CXCL9/PTGER2/CCL3/CCL5/CXCL12/CXCR6/CCR2	11
BP	GO:0002294	CD4-positive, alpha-beta T cell differentiation involved in immune response	5/74	60/18670	3.93058e-06	6.10175e-05	4.34629e-05	IRF4/LY9/SPN/TBX21/SLAMF6	5
BP	GO:0002287	alpha-beta T cell activation involved in immune response	5/74	61/18670	4.26836e-06	6.50227e-05	4.63158e-05	IRF4/LY9/SPN/TBX21/SLAMF6	5
BP	GO:0002293	alpha-beta T cell differentiation involved in immune response	5/74	61/18670	4.26836e-06	6.50227e-05	4.63158e-05	IRF4/LY9/SPN/TBX21/SLAMF6	5
BP	GO:0046635	positive regulation of alpha-beta T cell activation	5/74	62/18670	4.62851e-06	6.98563e-05	4.97588e-05	RUNX3/CD3E/PRKCQ/ZAP70/CCR2	5
BP	GO:0045619	regulation of lymphocyte differentiation	7/74	169/18670	4.75238e-06	7.10676e-05	5.06216e-05	RUNX3/CD2/IL7R/IRF4/ZAP70/TBX21/CCR2	7
BP	GO:0070229	negative regulation of lymphocyte apoptotic process	4/74	29/18670	5.00956e-06	7.42325e-05	5.2876e-05	IL7R/PRKCQ/CCL5/DOCK8	4
BP	GO:0050868	negative regulation of T cell activation	6/74	112/18670	5.41471e-06	7.95133e-05	5.66375e-05	RUNX3/SPN/PLA2G2D/TBX21/LAX1/TIGIT	6
BP	GO:0032743	positive regulation of interleukin-2 production	4/74	30/18670	5.76295e-06	8.38716e-05	5.97419e-05	CD3E/IRF4/PRKCQ/CCR2	4
BP	GO:0032729	positive regulation of interferon-gamma production	5/74	65/18670	5.85376e-06	8.44392e-05	6.01462e-05	CD2/CD3E/IRF8/SLAMF6/CCR2	5
BP	GO:0042108	positive regulation of cytokine biosynthetic process	5/74	67/18670	6.80235e-06	9.72617e-05	6.92797e-05	CD3E/IRF4/PRKCQ/SPN/CCR2	5
BP	GO:0002292	T cell differentiation involved in immune response	5/74	68/18670	7.31967e-06	0.000103748	7.39002e-05	IRF4/LY9/SPN/TBX21/SLAMF6	5
BP	GO:0022408	negative regulation of cell-cell adhesion	7/74	181/18670	7.46005e-06	0.000104827	7.46682e-05	RUNX3/CXCL12/SPN/PLA2G2D/TBX21/LAX1/TIGIT	7
BP	GO:0032633	interleukin-4 production	4/74	33/18670	8.52796e-06	0.000117801	8.39102e-05	CD3E/IRF4/ITK/PRKCQ	4
BP	GO:0070232	regulation of T cell apoptotic process	4/74	33/18670	8.52796e-06	0.000117801	8.39102e-05	IL7R/PRKCQ/CCL5/DOCK8	4
BP	GO:0045060	negative thymic T cell selection	3/74	11/18670	9.64024e-06	0.000132047	9.40574e-05	CD3E/CCR7/ZAP70	3
BP	GO:0002449	lymphocyte mediated immunity	9/74	352/18670	1.02144e-05	0.000138746	9.88288e-05	CD8A/IL7R/SH2D1A/IL18RAP/TBX21/SLAMF7/SLAMF6/CCR2/IGLL5	9
BP	GO:1902105	regulation of leukocyte differentiation	8/74	272/18670	1.20165e-05	0.000161875	0.000115304	RUNX3/CD2/IL7R/IRF4/CCL3/ZAP70/TBX21/CCR2	8
BP	GO:0043383	negative T cell selection	3/74	12/18670	1.2817e-05	0.000169852	0.000120986	CD3E/CCR7/ZAP70	3
BP	GO:0043922	negative regulation by host of viral transcription	3/74	12/18670	1.2817e-05	0.000169852	0.000120986	CCL3/CCL4/CCL5	3
BP	GO:0050852	T cell receptor signaling pathway	7/74	202/18670	1.52457e-05	0.000200408	0.000142751	CD3E/CD247/CCR7/HLA-DRB5/ITK/PRKCQ/ZAP70	7
BP	GO:0045086	positive regulation of interleukin-2 biosynthetic process	3/74	13/18670	1.66147e-05	0.000216655	0.000154324	CD3E/IRF4/PRKCQ	3
BP	GO:0070555	response to interleukin-1	7/74	207/18670	1.78555e-05	0.000230988	0.000164533	CD38/CHI3L1/CCL3/CCL4/CCL5/CCL18/CCL4L1	7
BP	GO:0071356	cellular response to tumor necrosis factor	8/74	291/18670	1.9558e-05	0.00025102	0.000178802	TNFRSF17/CHI3L1/CCL3/CCL4/CCL5/CCL18/SMPD3/CCL4L1	8
BP	GO:0070374	positive regulation of ERK1 and ERK2 cascade	7/74	215/18670	2.27932e-05	0.000290257	0.000206751	CHI3L1/CCR7/CCL3/CCL4/CCL5/CCL18/CCL4L1	7
BP	GO:0050920	regulation of chemotaxis	7/74	217/18670	2.41893e-05	0.000305648	0.000217714	CCR7/CCL3/CCL4/CCL5/CXCL12/CXCL14/CCR2	7
BP	GO:0051250	negative regulation of lymphocyte activation	6/74	146/18670	2.46758e-05	0.000309397	0.000220384	RUNX3/SPN/PLA2G2D/TBX21/LAX1/TIGIT	6
BP	GO:0050850	positive regulation of calcium-mediated signaling	4/74	43/18670	2.49601e-05	0.000310573	0.000221222	CD3E/CCL3/CCL4/ZAP70	4
BP	GO:0061756	leukocyte adhesion to vascular endothelial cell	4/74	44/18670	2.7374e-05	0.000338028	0.000240778	ITGA4/CXCL12/SPN/CCR2	4
BP	GO:0002706	regulation of lymphocyte mediated immunity	6/74	149/18670	2.76778e-05	0.000339209	0.000241619	IL7R/SH2D1A/IL18RAP/TBX21/SLAMF6/CCR2	6
BP	GO:0060333	interferon-gamma-mediated signaling pathway	5/74	91/18670	3.0425e-05	0.000370095	0.000263619	HLA-DRB5/IRF8/IRF4/SOCS3/TRIM22	5
BP	GO:0043547	positive regulation of GTPase activity	9/74	405/18670	3.09531e-05	0.00037373	0.000266209	CCR7/RASGRF1/RGS16/CCL3/CCL4/CCL5/CCL18/DOCK8/CCL4L1	9
BP	GO:0050729	positive regulation of inflammatory response	6/74	153/18670	3.21305e-05	0.000380984	0.000271376	CCR7/IL6ST/CCL3/CCL18/GBP5/CCR2	6
BP	GO:0034612	response to tumor necrosis factor	8/74	312/18670	3.21752e-05	0.000380984	0.000271376	TNFRSF17/CHI3L1/CCL3/CCL4/CCL5/CCL18/SMPD3/CCL4L1	8
BP	GO:0033631	cell-cell adhesion mediated by integrin	3/74	16/18670	3.22551e-05	0.000380984	0.000271376	CD3E/ITGA4/CCL5	3
BP	GO:0070231	T cell apoptotic process	4/74	47/18670	3.56455e-05	0.000418001	0.000297743	IL7R/PRKCQ/CCL5/DOCK8	4
BP	GO:0007204	positive regulation of cytosolic calcium ion concentration	8/74	319/18670	3.76612e-05	0.000438484	0.000312333	CD38/CCR5/CCR7/CXCL9/PTGER2/CCL3/CXCR6/CCR2	8
BP	GO:0032740	positive regulation of interleukin-17 production	3/74	17/18670	3.90553e-05	0.000451491	0.000321598	LY9/PRKCQ/SLAMF6	3
BP	GO:0050848	regulation of calcium-mediated signaling	5/74	98/18670	4.34843e-05	0.000499151	0.000355547	CD3E/PLEK/CCL3/CCL4/ZAP70	5
BP	GO:0090026	positive regulation of monocyte chemotaxis	3/74	18/18670	4.6733e-05	0.000532691	0.000379437	CCL5/CXCL12/CCR2	3
BP	GO:0045076	regulation of interleukin-2 biosynthetic process	3/74	19/18670	5.53375e-05	0.00062207	0.000443102	CD3E/IRF4/PRKCQ	3
BP	GO:0046641	positive regulation of alpha-beta T cell proliferation	3/74	19/18670	5.53375e-05	0.00062207	0.000443102	CD3E/ZAP70/CCR2	3
BP	GO:0070228	regulation of lymphocyte apoptotic process	4/74	53/18670	5.74782e-05	0.000641708	0.00045709	IL7R/PRKCQ/CCL5/DOCK8	4
BP	GO:0002286	T cell activation involved in immune response	5/74	106/18670	6.33149e-05	0.00069732	0.000496703	IRF4/LY9/SPN/TBX21/SLAMF6	5
BP	GO:0002456	T cell mediated immunity	5/74	106/18670	6.33149e-05	0.00069732	0.000496703	CD8A/IL7R/IL18RAP/TBX21/CCR2	5
BP	GO:0001909	leukocyte mediated cytotoxicity	5/74	107/18670	6.62149e-05	0.000724365	0.000515967	IL7R/SH2D1A/IL18RAP/SLAMF7/SLAMF6	5
BP	GO:0045061	thymic T cell selection	3/74	21/18670	7.55218e-05	0.00082067	0.000584565	CD3E/CCR7/ZAP70	3
BP	GO:0071347	cellular response to interleukin-1	6/74	179/18670	7.70942e-05	0.000832209	0.000592785	CHI3L1/CCL3/CCL4/CCL5/CCL18/CCL4L1	6
BP	GO:0002285	lymphocyte activation involved in immune response	6/74	181/18670	8.19747e-05	0.000879071	0.000626164	IRF4/LY9/SPN/ITM2A/TBX21/SLAMF6	6
BP	GO:0051480	regulation of cytosolic calcium ion concentration	8/74	357/18670	8.29851e-05	0.00088409	0.000629739	CD38/CCR5/CCR7/CXCL9/PTGER2/CCL3/CXCR6/CCR2	8
BP	GO:0033622	integrin activation	3/74	22/18670	8.71975e-05	0.00091698	0.000653167	PLEK/CXCL12/MZB1	3
BP	GO:0042094	interleukin-2 biosynthetic process	3/74	22/18670	8.71975e-05	0.00091698	0.000653167	CD3E/IRF4/PRKCQ	3
BP	GO:0042035	regulation of cytokine biosynthetic process	5/74	114/18670	8.94931e-05	0.000935088	0.000666065	CD3E/IRF4/PRKCQ/SPN/CCR2	5
BP	GO:0042267	natural killer cell mediated cytotoxicity	4/74	60/18670	9.37336e-05	0.000973158	0.000693182	SH2D1A/IL18RAP/SLAMF7/SLAMF6	4
BP	GO:0032753	positive regulation of interleukin-4 production	3/74	23/18670	9.99918e-05	0.00101887	0.000725744	CD3E/IRF4/PRKCQ	3
BP	GO:0045123	cellular extravasation	4/74	61/18670	0.000100012	0.00101887	0.000725744	ITGA4/CXCL12/SPN/CCR2	4
BP	GO:2000514	regulation of CD4-positive, alpha-beta T cell activation	4/74	61/18670	0.000100012	0.00101887	0.000725744	RUNX3/IRF4/PRKCQ/TBX21	4
BP	GO:0043087	regulation of GTPase activity	9/74	479/18670	0.000112519	0.00113257	0.000806729	CCR7/RASGRF1/RGS16/CCL3/CCL4/CCL5/CCL18/DOCK8/CCL4L1	9
BP	GO:0046637	regulation of alpha-beta T cell differentiation	4/74	63/18670	0.000113477	0.00113257	0.000806729	RUNX3/IRF4/ZAP70/TBX21	4
BP	GO:0032897	negative regulation of viral transcription	3/74	24/18670	0.000113951	0.00113257	0.000806729	CCL3/CCL4/CCL5	3
BP	GO:0071677	positive regulation of mononuclear cell migration	3/74	24/18670	0.000113951	0.00113257	0.000806729	CCL5/CXCL12/CCR2	3
BP	GO:0002228	natural killer cell mediated immunity	4/74	64/18670	0.00012068	0.00118499	0.000844074	SH2D1A/IL18RAP/SLAMF7/SLAMF6	4
BP	GO:0046782	regulation of viral transcription	4/74	64/18670	0.00012068	0.00118499	0.000844074	CCL3/CCL4/CCL5/MDFIC	4
BP	GO:0050727	regulation of inflammatory response	9/74	485/18670	0.000123612	0.00120652	0.000859403	CCR7/IL6ST/CCL3/CCL5/CCL18/CST7/SOCS3/GBP5/CCR2	9
BP	GO:0042089	cytokine biosynthetic process	5/74	123/18670	0.000128131	0.00123582	0.000880278	CD3E/IRF4/PRKCQ/SPN/CCR2	5
BP	GO:0051928	positive regulation of calcium ion transport	5/74	123/18670	0.000128131	0.00123582	0.000880278	CXCL9/CCL3/CCL4/CCL5/CXCL12	5
BP	GO:0090025	regulation of monocyte chemotaxis	3/74	25/18670	0.000129122	0.00123805	0.000881867	CCL5/CXCL12/CCR2	3
BP	GO:0042107	cytokine metabolic process	5/74	124/18670	0.000133106	0.00126879	0.000903759	CD3E/IRF4/PRKCQ/SPN/CCR2	5
BP	GO:0002440	production of molecular mediator of immune response	7/74	286/18670	0.000137776	0.00130566	0.000930028	IL7R/IL18RAP/ITM2A/TBX21/MZB1/LAX1/CCR2	7
BP	GO:0002703	regulation of leukocyte mediated immunity	6/74	201/18670	0.000145675	0.00137255	0.000977667	IL7R/SH2D1A/IL18RAP/TBX21/SLAMF6/CCR2	6
BP	GO:0007162	negative regulation of cell adhesion	7/74	289/18670	0.00014694	0.00137651	0.000980491	RUNX3/CXCL12/SPN/PLA2G2D/TBX21/LAX1/TIGIT	7
BP	GO:0070227	lymphocyte apoptotic process	4/74	69/18670	0.000161764	0.00149518	0.00106502	IL7R/PRKCQ/CCL5/DOCK8	4
BP	GO:0032673	regulation of interleukin-4 production	3/74	27/18670	0.000163277	0.00149518	0.00106502	CD3E/IRF4/PRKCQ	3
BP	GO:0043921	modulation by host of viral transcription	3/74	27/18670	0.000163277	0.00149518	0.00106502	CCL3/CCL4/CCL5	3
BP	GO:0052472	modulation by host of symbiont transcription	3/74	27/18670	0.000163277	0.00149518	0.00106502	CCL3/CCL4/CCL5	3
BP	GO:0033077	T cell differentiation in thymus	4/74	70/18670	0.000171056	0.00155766	0.00110952	CD3E/CCR7/IL7R/ZAP70	4
BP	GO:0002691	regulation of cellular extravasation	3/74	28/18670	0.000182351	0.00162422	0.00115693	ITGA4/CXCL12/CCR2	3
BP	GO:0010818	T cell chemotaxis	3/74	28/18670	0.000182351	0.00162422	0.00115693	CCL3/CCL5/CCR2	3
BP	GO:0052312	modulation of transcription in other organism involved in symbiotic interaction	3/74	28/18670	0.000182351	0.00162422	0.00115693	CCL3/CCL4/CCL5	3
BP	GO:1904994	regulation of leukocyte adhesion to vascular endothelial cell	3/74	28/18670	0.000182351	0.00162422	0.00115693	ITGA4/CXCL12/CCR2	3
BP	GO:0070372	regulation of ERK1 and ERK2 cascade	7/74	300/18670	0.000184877	0.00163777	0.00116659	CHI3L1/CCR7/CCL3/CCL4/CCL5/CCL18/CCL4L1	7
BP	GO:0002699	positive regulation of immune effector process	6/74	216/18670	0.000215251	0.00189653	0.0013509	SH2D1A/IL18RAP/TBX21/MZB1/SLAMF6/CCR2	6
BP	GO:0045954	positive regulation of natural killer cell mediated cytotoxicity	3/74	30/18670	0.000224707	0.00195868	0.00139517	SH2D1A/IL18RAP/SLAMF6	3
BP	GO:0046640	regulation of alpha-beta T cell proliferation	3/74	30/18670	0.000224707	0.00195868	0.00139517	CD3E/ZAP70/CCR2	3
BP	GO:0070371	ERK1 and ERK2 cascade	7/74	317/18670	0.000258781	0.00224086	0.00159617	CHI3L1/CCR7/CCL3/CCL4/CCL5/CCL18/CCL4L1	7
BP	GO:0001910	regulation of leukocyte mediated cytotoxicity	4/74	78/18670	0.00025983	0.00224086	0.00159617	IL7R/SH2D1A/IL18RAP/SLAMF6	4
BP	GO:0002717	positive regulation of natural killer cell mediated immunity	3/74	33/18670	0.000299405	0.00254989	0.0018163	SH2D1A/IL18RAP/SLAMF6	3
BP	GO:0046633	alpha-beta T cell proliferation	3/74	33/18670	0.000299405	0.00254989	0.0018163	CD3E/ZAP70/CCR2	3
BP	GO:0034109	homotypic cell-cell adhesion	4/74	81/18670	0.000300356	0.00254989	0.0018163	GP1BA/PLEK/PRKCQ/CCL5	4
BP	GO:0006816	calcium ion transport	8/74	434/18670	0.000314971	0.00266011	0.00189481	ATP2A3/CCR5/CCR7/CXCL9/CCL3/CCL4/CCL5/CXCL12	8
BP	GO:0032660	regulation of interleukin-17 production	3/74	34/18670	0.000327447	0.00275123	0.00195971	LY9/PRKCQ/SLAMF6	3
BP	GO:0032496	response to lipopolysaccharide	7/74	330/18670	0.000330026	0.00275868	0.00196501	CCR5/CCR7/IRF8/CXCL9/PTGER2/CCL3/CCL5	7
BP	GO:0032760	positive regulation of tumor necrosis factor production	4/74	86/18670	0.000377688	0.00314098	0.00223733	CD2/CCL3/SPN/CCR2	4
BP	GO:1903557	positive regulation of tumor necrosis factor superfamily cytokine production	4/74	88/18670	0.000412274	0.00339993	0.00242178	CD2/CCL3/SPN/CCR2	4
BP	GO:0045088	regulation of innate immune response	8/74	452/18670	0.000412998	0.00339993	0.00242178	IRF4/SH2D1A/CCL5/IL18RAP/SOCS3/SLAMF6/GBP5/PYHIN1	8
BP	GO:0002237	response to molecule of bacterial origin	7/74	343/18670	0.000416255	0.00340953	0.00242861	CCR5/CCR7/IRF8/CXCL9/PTGER2/CCL3/CCL5	7
BP	GO:0002819	regulation of adaptive immune response	5/74	160/18670	0.000434326	0.00353976	0.00252138	IL6ST/IL7R/PRKCQ/TBX21/CCR2	5
BP	GO:0002697	regulation of immune effector process	8/74	458/18670	0.000450721	0.0036551	0.00260354	IL7R/IRF4/SH2D1A/IL18RAP/TBX21/MZB1/SLAMF6/CCR2	8
BP	GO:0032620	interleukin-17 production	3/74	38/18670	0.000456403	0.00368285	0.00262331	LY9/PRKCQ/SLAMF6	3
BP	GO:1904894	positive regulation of STAT cascade	4/74	92/18670	0.000488143	0.00391958	0.00279192	IL6ST/IL7R/CCL5/SOCS3	4
BP	GO:0097696	STAT cascade	5/74	166/18670	0.00051378	0.00410521	0.00292415	IL6ST/IL7R/CCL5/SOCS3/CCR2	5
BP	GO:0002369	T cell cytokine production	3/74	40/18670	0.000531497	0.00422605	0.00301022	IL18RAP/TBX21/CCR2	3
BP	GO:0001906	cell killing	5/74	168/18670	0.000542552	0.00429301	0.00305792	IL7R/SH2D1A/IL18RAP/SLAMF7/SLAMF6	5
BP	GO:0042100	B cell proliferation	4/74	95/18670	0.000551218	0.00434051	0.00309175	CD38/CD79A/IL7R/MZB1	4
BP	GO:0031341	regulation of cell killing	4/74	98/18670	0.000619883	0.00485774	0.00346018	IL7R/SH2D1A/IL18RAP/SLAMF6	4
BP	GO:0070838	divalent metal ion transport	8/74	483/18670	0.00063934	0.00498624	0.00355171	ATP2A3/CCR5/CCR7/CXCL9/CCL3/CCL4/CCL5/CXCL12	8
BP	GO:0042088	T-helper 1 type immune response	3/74	43/18670	0.000658254	0.0051093	0.00363937	SPN/IL18RAP/CCR2	3
BP	GO:0001768	establishment of T cell polarity	2/74	10/18670	0.000683228	0.00520403	0.00370684	CCR7/DOCK8	2
BP	GO:0097048	dendritic cell apoptotic process	2/74	10/18670	0.000683228	0.00520403	0.00370684	CCR7/CXCL12	2
BP	GO:2000109	regulation of macrophage apoptotic process	2/74	10/18670	0.000683228	0.00520403	0.00370684	CCR5/CCL5	2
BP	GO:2000668	regulation of dendritic cell apoptotic process	2/74	10/18670	0.000683228	0.00520403	0.00370684	CCR7/CXCL12	2
BP	GO:0072511	divalent inorganic cation transport	8/74	489/18670	0.000692989	0.00524024	0.00373263	ATP2A3/CCR5/CCR7/CXCL9/CCL3/CCL4/CCL5/CXCL12	8
BP	GO:0032611	interleukin-1 beta production	4/74	101/18670	0.000694412	0.00524024	0.00373263	CCR7/CCL3/GBP5/PYHIN1	4
BP	GO:0042269	regulation of natural killer cell mediated cytotoxicity	3/74	44/18670	0.000704416	0.00529123	0.00376896	SH2D1A/IL18RAP/SLAMF6	3
BP	GO:0043270	positive regulation of ion transport	6/74	275/18670	0.000774675	0.00577369	0.00411261	CXCL9/CCL3/CCL4/CCL5/CXCL12/CCR2	6
BP	GO:0045089	positive regulation of innate immune response	7/74	381/18670	0.000775728	0.00577369	0.00411261	IRF4/SH2D1A/CCL5/IL18RAP/SLAMF6/GBP5/PYHIN1	7
BP	GO:0002715	regulation of natural killer cell mediated immunity	3/74	46/18670	0.000802816	0.00587221	0.00418279	SH2D1A/IL18RAP/SLAMF6	3
BP	GO:0071675	regulation of mononuclear cell migration	3/74	46/18670	0.000802816	0.00587221	0.00418279	CCL5/CXCL12/CCR2	3
BP	GO:0002708	positive regulation of lymphocyte mediated immunity	4/74	105/18670	0.000803377	0.00587221	0.00418279	SH2D1A/IL18RAP/TBX21/SLAMF6	4
BP	GO:0002821	positive regulation of adaptive immune response	4/74	105/18670	0.000803377	0.00587221	0.00418279	IL6ST/PRKCQ/TBX21/CCR2	4
BP	GO:0001767	establishment of lymphocyte polarity	2/74	11/18670	0.000832914	0.0060073	0.00427901	CCR7/DOCK8	2
BP	GO:0033632	regulation of cell-cell adhesion mediated by integrin	2/74	11/18670	0.000832914	0.0060073	0.00427901	CD3E/CCL5	2
BP	GO:1903977	positive regulation of glial cell migration	2/74	11/18670	0.000832914	0.0060073	0.00427901	CCL3/CCR2	2
BP	GO:0043370	regulation of CD4-positive, alpha-beta T cell differentiation	3/74	47/18670	0.000855123	0.00614031	0.00437376	RUNX3/IRF4/TBX21	3
BP	GO:0002704	negative regulation of leukocyte mediated immunity	3/74	49/18670	0.00096612	0.00690691	0.00491981	IL7R/TBX21/CCR2	3
BP	GO:0070493	thrombin-activated receptor signaling pathway	2/74	12/18670	0.000996934	0.00706523	0.00503258	GP1BA/PLEK	2
BP	GO:0071888	macrophage apoptotic process	2/74	12/18670	0.000996934	0.00706523	0.00503258	CCR5/CCL5	2
BP	GO:0002377	immunoglobulin production	5/74	193/18670	0.00101362	0.00715239	0.00509466	IL7R/ITM2A/TBX21/MZB1/LAX1	5
BP	GO:0070741	response to interleukin-6	3/74	50/18670	0.00102488	0.00720064	0.00512903	CHI3L1/IL6ST/SOCS3	3
BP	GO:0032612	interleukin-1 production	4/74	115/18670	0.00112779	0.0078897	0.00561985	CCR7/CCL3/GBP5/PYHIN1	4
BP	GO:0002829	negative regulation of type 2 immune response	2/74	13/18670	0.00117517	0.00811666	0.00578152	TBX21/CCR2	2
BP	GO:0035589	G protein-coupled purinergic nucleotide receptor signaling pathway	2/74	13/18670	0.00117517	0.00811666	0.00578152	GPR171/P2RY13	2
BP	GO:0045059	positive thymic T cell selection	2/74	13/18670	0.00117517	0.00811666	0.00578152	CD3E/ZAP70	2
BP	GO:0050702	interleukin-1 beta secretion	3/74	53/18670	0.00121456	0.0083182	0.00592507	CCR7/CCL3/GBP5	3
BP	GO:1905517	macrophage migration	3/74	53/18670	0.00121456	0.0083182	0.00592507	CCL3/CCL5/CCR2	3
BP	GO:0032655	regulation of interleukin-12 production	3/74	54/18670	0.00128236	0.00874582	0.00622967	CCR7/IRF8/TIGIT	3
BP	GO:0030099	myeloid cell differentiation	7/74	416/18670	0.00129208	0.00877541	0.00625074	CCR7/GP1BA/IRF8/IRF4/PRKCQ/CCL3/GPR171	7
BP	GO:0071222	cellular response to lipopolysaccharide	5/74	205/18670	0.00132517	0.00896275	0.00638419	CCR5/IRF8/CXCL9/CCL3/CCL5	5
BP	GO:0001771	immunological synapse formation	2/74	14/18670	0.00136752	0.00921099	0.00656101	CCR7/DOCK8	2
BP	GO:0001912	positive regulation of leukocyte mediated cytotoxicity	3/74	56/18670	0.00142502	0.00948073	0.00675315	SH2D1A/IL18RAP/SLAMF6	3
BP	GO:0031295	T cell costimulation	3/74	56/18670	0.00142502	0.00948073	0.00675315	CD3E/CD5/CCR7	3
BP	GO:0032615	interleukin-12 production	3/74	56/18670	0.00142502	0.00948073	0.00675315	CCR7/IRF8/TIGIT	3
BP	GO:0007163	establishment or maintenance of cell polarity	5/74	210/18670	0.00147393	0.0097663	0.00695656	CCR7/CCL4/SPN/UST/DOCK8	5
BP	GO:0051209	release of sequestered calcium ion into cytosol	4/74	124/18670	0.00148996	0.00983254	0.00700374	CCR5/CCR7/CXCL9/CCL3	4
BP	GO:0031294	lymphocyte costimulation	3/74	57/18670	0.00149993	0.00985841	0.00702217	CD3E/CD5/CCR7	3
BP	GO:0071219	cellular response to molecule of bacterial origin	5/74	212/18670	0.00153676	0.0100599	0.0071657	CCR5/IRF8/CXCL9/CCL3/CCL5	5
BP	GO:0051283	negative regulation of sequestering of calcium ion	4/74	126/18670	0.00158026	0.0103033	0.00733905	CCR5/CCR7/CXCL9/CCL3	4
BP	GO:0070527	platelet aggregation	3/74	59/18670	0.00165706	0.010761	0.0076651	GP1BA/PLEK/PRKCQ	3
BP	GO:0051282	regulation of sequestering of calcium ion	4/74	128/18670	0.0016743	0.0108298	0.00771409	CCR5/CCR7/CXCL9/CCL3	4
BP	GO:0050853	B cell receptor signaling pathway	4/74	129/18670	0.00172275	0.0110991	0.00790594	CD38/CD79A/ITK/IGLL5	4
BP	GO:0010820	positive regulation of T cell chemotaxis	2/74	16/18670	0.0017941	0.0114681	0.00816878	CCL5/CCR2	2
BP	GO:0033033	negative regulation of myeloid cell apoptotic process	2/74	16/18670	0.0017941	0.0114681	0.00816878	CCR5/CCL5	2
BP	GO:0051208	sequestering of calcium ion	4/74	131/18670	0.00182256	0.0115694	0.00824094	CCR5/CCR7/CXCL9/CCL3	4
BP	GO:0050701	interleukin-1 secretion	3/74	61/18670	0.00182414	0.0115694	0.00824094	CCR7/CCL3/GBP5	3
BP	GO:0009615	response to virus	6/74	326/18670	0.00185115	0.0116952	0.00833053	CXCL9/CCL4/CCL5/CXCL12/TRIM22/TBX21	6
BP	GO:0002705	positive regulation of leukocyte mediated immunity	4/74	133/18670	0.00192631	0.0121231	0.00863533	SH2D1A/IL18RAP/TBX21/SLAMF6	4
BP	GO:0002693	positive regulation of cellular extravasation	2/74	17/18670	0.0020281	0.0125696	0.00895336	ITGA4/CCR2	2
BP	GO:0010819	regulation of T cell chemotaxis	2/74	17/18670	0.0020281	0.0125696	0.00895336	CCL5/CCR2	2
BP	GO:1903975	regulation of glial cell migration	2/74	17/18670	0.0020281	0.0125696	0.00895336	CCL3/CCR2	2
BP	GO:1904996	positive regulation of leukocyte adhesion to vascular endothelial cell	2/74	17/18670	0.0020281	0.0125696	0.00895336	ITGA4/CCR2	2
BP	GO:0007194	negative regulation of adenylate cyclase activity	2/74	18/18670	0.00227577	0.0140512	0.0100087	P2RY13/CCR2	2
BP	GO:0046626	regulation of insulin receptor signaling pathway	3/74	66/18670	0.00228673	0.0140656	0.0100189	PRKCQ/SOCS3/MZB1	3
BP	GO:0097553	calcium ion transmembrane import into cytosol	4/74	140/18670	0.00232167	0.0142268	0.0101338	CCR5/CCR7/CXCL9/CCL3	4
BP	GO:0071216	cellular response to biotic stimulus	5/74	236/18670	0.00245355	0.0149786	0.0106693	CCR5/IRF8/CXCL9/CCL3/CCL5	5
BP	GO:0031343	positive regulation of cell killing	3/74	68/18670	0.00249028	0.0150339	0.0107087	SH2D1A/IL18RAP/SLAMF6	3
BP	GO:0033627	cell adhesion mediated by integrin	3/74	68/18670	0.00249028	0.0150339	0.0107087	CD3E/ITGA4/CCL5	3
BP	GO:0050918	positive chemotaxis	3/74	68/18670	0.00249028	0.0150339	0.0107087	CCL3/CCL5/CXCL12	3
BP	GO:0002710	negative regulation of T cell mediated immunity	2/74	19/18670	0.002537	0.0152594	0.0108693	IL7R/TBX21	2
BP	GO:0002822	regulation of adaptive immune response based on somatic recombination of immune receptors built from immunoglobulin superfamily domains	4/74	145/18670	0.00263614	0.0157518	0.0112201	IL7R/PRKCQ/TBX21/CCR2	4
BP	GO:0050663	cytokine secretion	5/74	240/18670	0.00263819	0.0157518	0.0112201	CD2/CHI3L1/CCR7/CCL3/GBP5	5
BP	GO:1904892	regulation of STAT cascade	4/74	146/18670	0.00270237	0.0160316	0.0114193	IL6ST/IL7R/CCL5/SOCS3	4
BP	GO:0002709	regulation of T cell mediated immunity	3/74	70/18670	0.00270471	0.0160316	0.0114193	IL7R/TBX21/CCR2	3
BP	GO:0031280	negative regulation of cyclase activity	2/74	20/18670	0.00281168	0.0162772	0.0115943	P2RY13/CCR2	2
BP	GO:0033630	positive regulation of cell adhesion mediated by integrin	2/74	20/18670	0.00281168	0.0162772	0.0115943	CD3E/CCL5	2
BP	GO:0042535	positive regulation of tumor necrosis factor biosynthetic process	2/74	20/18670	0.00281168	0.0162772	0.0115943	SPN/CCR2	2
BP	GO:0043371	negative regulation of CD4-positive, alpha-beta T cell differentiation	2/74	20/18670	0.00281168	0.0162772	0.0115943	RUNX3/TBX21	2
BP	GO:1903978	regulation of microglial cell activation	2/74	20/18670	0.00281168	0.0162772	0.0115943	CCL3/CST7	2
BP	GO:1905523	positive regulation of macrophage migration	2/74	20/18670	0.00281168	0.0162772	0.0115943	CCL3/CCL5	2
BP	GO:0042531	positive regulation of tyrosine phosphorylation of STAT protein	3/74	71/18670	0.00281606	0.0162772	0.0115943	IL6ST/CCL5/SOCS3	3
BP	GO:0048872	homeostasis of number of cells	5/74	246/18670	0.0029338	0.0168979	0.0120364	TNFRSF17/CCR7/IL7R/SIT1/CCR2	5
BP	GO:0035590	purinergic nucleotide receptor signaling pathway	2/74	21/18670	0.00309969	0.0176045	0.0125397	GPR171/P2RY13	2
BP	GO:0035743	CD4-positive, alpha-beta T cell cytokine production	2/74	21/18670	0.00309969	0.0176045	0.0125397	IL18RAP/TBX21	2
BP	GO:0090280	positive regulation of calcium ion import	2/74	21/18670	0.00309969	0.0176045	0.0125397	CCL3/CXCL12	2
BP	GO:2000316	regulation of T-helper 17 type immune response	2/74	21/18670	0.00309969	0.0176045	0.0125397	PRKCQ/TBX21	2
BP	GO:0018108	peptidyl-tyrosine phosphorylation	6/74	363/18670	0.00316114	0.0178005	0.0126793	CD3E/IL6ST/ITK/CCL5/ZAP70/SOCS3	6
BP	GO:0014015	positive regulation of gliogenesis	3/74	74/18670	0.00316695	0.0178005	0.0126793	IL6ST/CCL3/CCR2	3
BP	GO:1900076	regulation of cellular response to insulin stimulus	3/74	74/18670	0.00316695	0.0178005	0.0126793	PRKCQ/SOCS3/MZB1	3
BP	GO:0018212	peptidyl-tyrosine modification	6/74	366/18670	0.00329158	0.0184374	0.013133	CD3E/IL6ST/ITK/CCL5/ZAP70/SOCS3	6
BP	GO:1903707	negative regulation of hemopoiesis	4/74	155/18670	0.00335058	0.0187036	0.0133226	RUNX3/CCL3/GPR171/TBX21	4
BP	GO:0051924	regulation of calcium ion transport	5/74	254/18670	0.00336436	0.0187164	0.0133317	CXCL9/CCL3/CCL4/CCL5/CXCL12	5
BP	GO:0006925	inflammatory cell apoptotic process	2/74	22/18670	0.00340094	0.0188556	0.0134309	CCR5/CCL5	2
BP	GO:0007259	JAK-STAT cascade	4/74	156/18670	0.00342858	0.0189444	0.0134941	IL6ST/CCL5/SOCS3/CCR2	4
BP	GO:0051851	modification by host of symbiont morphology or physiology	3/74	77/18670	0.00354356	0.0195135	0.0138995	CCL3/CCL4/CCL5	3
BP	GO:0060402	calcium ion transport into cytosol	4/74	158/18670	0.00358827	0.0196932	0.0140275	CCR5/CCR7/CXCL9/CCL3	4
BP	GO:0034695	response to prostaglandin E	2/74	23/18670	0.00371532	0.0202541	0.014427	CCR7/PTGER2	2
BP	GO:0051350	negative regulation of lyase activity	2/74	23/18670	0.00371532	0.0202541	0.014427	P2RY13/CCR2	2
BP	GO:0032680	regulation of tumor necrosis factor production	4/74	160/18670	0.00375294	0.020391	0.0145245	CD2/CCL3/SPN/CCR2	4
BP	GO:0030193	regulation of blood coagulation	3/74	79/18670	0.0038092	0.0206279	0.0146933	GP1BA/PLEK/PRKCQ	3
BP	GO:1900046	regulation of hemostasis	3/74	80/18670	0.00394645	0.0213004	0.0151723	GP1BA/PLEK/PRKCQ	3
BP	GO:0032640	tumor necrosis factor production	4/74	163/18670	0.00400947	0.0214646	0.0152893	CD2/CCL3/SPN/CCR2	4
BP	GO:1903555	regulation of tumor necrosis factor superfamily cytokine production	4/74	163/18670	0.00400947	0.0214646	0.0152893	CD2/CCL3/SPN/CCR2	4
BP	GO:0035588	G protein-coupled purinergic receptor signaling pathway	2/74	24/18670	0.00404271	0.0214646	0.0152893	GPR171/P2RY13	2
BP	GO:0042832	defense response to protozoan	2/74	24/18670	0.00404271	0.0214646	0.0152893	IRF8/IRF4	2
BP	GO:0046639	negative regulation of alpha-beta T cell differentiation	2/74	24/18670	0.00404271	0.0214646	0.0152893	RUNX3/TBX21	2
BP	GO:0051702	interaction with symbiont	3/74	82/18670	0.00422992	0.0223856	0.0159453	CCL3/CCL4/CCL5	3
BP	GO:0043491	protein kinase B signaling	5/74	269/18670	0.0042917	0.0226391	0.0161258	CHI3L1/CCR7/CCL3/CCL5/SMPD3	5
BP	GO:0045165	cell fate commitment	5/74	270/18670	0.00435939	0.0227527	0.0162068	IRF4/LY9/SPN/TBX21/SLAMF6	5
BP	GO:0042509	regulation of tyrosine phosphorylation of STAT protein	3/74	83/18670	0.00437617	0.0227527	0.0162068	IL6ST/CCL5/SOCS3	3
BP	GO:0045582	positive regulation of T cell differentiation	3/74	83/18670	0.00437617	0.0227527	0.0162068	RUNX3/IL7R/ZAP70	3
BP	GO:0001562	response to protozoan	2/74	25/18670	0.00438303	0.0227527	0.0162068	IRF8/IRF4	2
BP	GO:0034110	regulation of homotypic cell-cell adhesion	2/74	25/18670	0.00438303	0.0227527	0.0162068	PRKCQ/CCL5	2
BP	GO:0071706	tumor necrosis factor superfamily cytokine production	4/74	168/18670	0.00446299	0.0230942	0.01645	CD2/CCL3/SPN/CCR2	4
BP	GO:0050818	regulation of coagulation	3/74	84/18670	0.00452547	0.0233434	0.0166275	GP1BA/PLEK/PRKCQ	3
BP	GO:0010959	regulation of metal ion transport	6/74	394/18670	0.00471136	0.0242256	0.017256	CXCL9/CCL3/CCL4/CCL5/CXCL12/KCNAB2	6
BP	GO:0060401	cytosolic calcium ion transport	4/74	171/18670	0.00475108	0.024353	0.0173467	CCR5/CCR7/CXCL9/CCL3	4
BP	GO:0001776	leukocyte homeostasis	3/74	86/18670	0.00483324	0.0246193	0.0175364	TNFRSF17/SIT1/CCR2	3
BP	GO:0007260	tyrosine phosphorylation of STAT protein	3/74	86/18670	0.00483324	0.0246193	0.0175364	IL6ST/CCL5/SOCS3	3
BP	GO:0051262	protein tetramerization	4/74	172/18670	0.00484982	0.0246268	0.0175417	CD247/CD79A/CCL5/GBP5	4
BP	GO:0000188	inactivation of MAPK activity	2/74	27/18670	0.00510198	0.0258268	0.0183965	DUSP2/LAX1	2
BP	GO:0046427	positive regulation of JAK-STAT cascade	3/74	89/18670	0.00531815	0.0268377	0.0191166	IL6ST/CCL5/SOCS3	3
BP	GO:0019083	viral transcription	4/74	177/18670	0.00536432	0.0269872	0.019223	CCL3/CCL4/CCL5/MDFIC	4
BP	GO:0001773	myeloid dendritic cell activation	2/74	28/18670	0.00548041	0.0273464	0.0194789	CD2/IRF4	2
BP	GO:0045761	regulation of adenylate cyclase activity	2/74	28/18670	0.00548041	0.0273464	0.0194789	P2RY13/CCR2	2
BP	GO:0032651	regulation of interleukin-1 beta production	3/74	90/18670	0.00548605	0.0273464	0.0194789	CCR7/CCL3/PYHIN1	3
BP	GO:0033032	regulation of myeloid cell apoptotic process	2/74	29/18670	0.00587135	0.0288262	0.020533	CCR5/CCL5	2
BP	GO:0070102	interleukin-6-mediated signaling pathway	2/74	29/18670	0.00587135	0.0288262	0.020533	IL6ST/SOCS3	2
BP	GO:0070723	response to cholesterol	2/74	29/18670	0.00587135	0.0288262	0.020533	CCR5/CCL3	2
BP	GO:0072606	interleukin-8 secretion	2/74	29/18670	0.00587135	0.0288262	0.020533	CD2/CHI3L1	2
BP	GO:2000515	negative regulation of CD4-positive, alpha-beta T cell activation	2/74	29/18670	0.00587135	0.0288262	0.020533	RUNX3/TBX21	2
BP	GO:0050864	regulation of B cell activation	4/74	184/18670	0.00614429	0.0300756	0.0214229	CD38/TBX21/MZB1/IGLL5	4
BP	GO:0045621	positive regulation of lymphocyte differentiation	3/74	94/18670	0.0061894	0.0301156	0.0214514	RUNX3/IL7R/ZAP70	3
BP	GO:0051289	protein homotetramerization	3/74	94/18670	0.0061894	0.0301156	0.0214514	CD247/CD79A/GBP5	3
BP	GO:0002828	regulation of type 2 immune response	2/74	30/18670	0.00627468	0.0303493	0.0216179	TBX21/CCR2	2
BP	GO:0050690	regulation of defense response to virus by virus	2/74	30/18670	0.00627468	0.0303493	0.0216179	CD247/CD8B	2
BP	GO:0002675	positive regulation of acute inflammatory response	2/74	31/18670	0.00669031	0.0319801	0.0227795	CCR7/IL6ST	2
BP	GO:0002724	regulation of T cell cytokine production	2/74	31/18670	0.00669031	0.0319801	0.0227795	TBX21/CCR2	2
BP	GO:0010543	regulation of platelet activation	2/74	31/18670	0.00669031	0.0319801	0.0227795	PLEK/PRKCQ	2
BP	GO:0034694	response to prostaglandin	2/74	31/18670	0.00669031	0.0319801	0.0227795	CCR7/PTGER2	2
BP	GO:0019080	viral gene expression	4/74	191/18670	0.00699644	0.0333456	0.0237521	CCL3/CCL4/CCL5/MDFIC	4
BP	GO:0035587	purinergic receptor signaling pathway	2/74	32/18670	0.00711813	0.0337394	0.0240327	GPR171/P2RY13	2
BP	GO:0050731	positive regulation of peptidyl-tyrosine phosphorylation	4/74	192/18670	0.00712422	0.0337394	0.0240327	CD3E/IL6ST/CCL5/SOCS3	4
BP	GO:0048525	negative regulation of viral process	3/74	99/18670	0.00714117	0.0337394	0.0240327	CCL3/CCL4/CCL5	3
BP	GO:0002824	positive regulation of adaptive immune response based on somatic recombination of immune receptors built from immunoglobulin superfamily domains	3/74	100/18670	0.00734134	0.0345849	0.0246349	PRKCQ/TBX21/CCR2	3
BP	GO:0033028	myeloid cell apoptotic process	2/74	33/18670	0.00755805	0.0354012	0.0252163	CCR5/CCL5	2
BP	GO:0036314	response to sterol	2/74	33/18670	0.00755805	0.0354012	0.0252163	CCR5/CCL3	2
BP	GO:0002367	cytokine production involved in immune response	3/74	102/18670	0.00775162	0.0362038	0.0257881	IL18RAP/TBX21/CCR2	3
BP	GO:0032652	regulation of interleukin-1 production	3/74	103/18670	0.00796174	0.036882	0.0262711	CCR7/CCL3/PYHIN1	3
BP	GO:1902106	negative regulation of leukocyte differentiation	3/74	103/18670	0.00796174	0.036882	0.0262711	RUNX3/CCL3/TBX21	3
BP	GO:0010574	regulation of vascular endothelial growth factor production	2/74	34/18670	0.00800996	0.036882	0.0262711	IL6ST/CCR2	2
BP	GO:0042533	tumor necrosis factor biosynthetic process	2/74	34/18670	0.00800996	0.036882	0.0262711	SPN/CCR2	2
BP	GO:0042534	regulation of tumor necrosis factor biosynthetic process	2/74	34/18670	0.00800996	0.036882	0.0262711	SPN/CCR2	2
BP	GO:0019233	sensory perception of pain	3/74	104/18670	0.0081752	0.0375369	0.0267376	CCL3/CXCL12/CCR2	3
BP	GO:0070588	calcium ion transmembrane transport	5/74	315/18670	0.00826245	0.0378309	0.026947	ATP2A3/CCR5/CCR7/CXCL9/CCL3	5
BP	GO:0032735	positive regulation of interleukin-12 production	2/74	35/18670	0.00847377	0.0384742	0.0274053	CCR7/IRF8	2
BP	GO:0042092	type 2 immune response	2/74	35/18670	0.00847377	0.0384742	0.0274053	TBX21/CCR2	2
BP	GO:0045622	regulation of T-helper cell differentiation	2/74	35/18670	0.00847377	0.0384742	0.0274053	IRF4/TBX21	2
BP	GO:0010573	vascular endothelial growth factor production	2/74	36/18670	0.00894937	0.0400755	0.0285459	IL6ST/CCR2	2
BP	GO:0014808	release of sequestered calcium ion into cytosol by sarcoplasmic reticulum	2/74	36/18670	0.00894937	0.0400755	0.0285459	CCR5/CCL3	2
BP	GO:0032733	positive regulation of interleukin-10 production	2/74	36/18670	0.00894937	0.0400755	0.0285459	IRF4/TIGIT	2
BP	GO:0046627	negative regulation of insulin receptor signaling pathway	2/74	36/18670	0.00894937	0.0400755	0.0285459	PRKCQ/SOCS3	2
BP	GO:2000310	regulation of NMDA receptor activity	2/74	36/18670	0.00894937	0.0400755	0.0285459	RASGRF1/CCR2	2
BP	GO:0050792	regulation of viral process	4/74	208/18670	0.00938292	0.0419018	0.0298467	CCL3/CCL4/CCL5/MDFIC	4
BP	GO:1903514	release of sequestered calcium ion into cytosol by endoplasmic reticulum	2/74	37/18670	0.00943667	0.0420267	0.0299357	CCR5/CCL3	2
BP	GO:0002707	negative regulation of lymphocyte mediated immunity	2/74	38/18670	0.00993558	0.0437702	0.0311776	IL7R/TBX21	2
BP	GO:0046636	negative regulation of alpha-beta T cell activation	2/74	38/18670	0.00993558	0.0437702	0.0311776	RUNX3/TBX21	2
BP	GO:0048246	macrophage chemotaxis	2/74	38/18670	0.00993558	0.0437702	0.0311776	CCL3/CCL5	2
BP	GO:1900077	negative regulation of cellular response to insulin stimulus	2/74	38/18670	0.00993558	0.0437702	0.0311776	PRKCQ/SOCS3	2
BP	GO:0051817	modification of morphology or physiology of other organism involved in symbiotic interaction	3/74	112/18670	0.0100046	0.0439554	0.0313095	CCL3/CCL4/CCL5	3
BP	GO:1905521	regulation of macrophage migration	2/74	39/18670	0.010446	0.0457714	0.0326031	CCL3/CCL5	2
BP	GO:0008037	cell recognition	4/74	215/18670	0.0105025	0.0458955	0.0326915	CD5/CCR7/DOCK8/IGLL5	4
BP	GO:0002823	negative regulation of adaptive immune response based on somatic recombination of immune receptors built from immunoglobulin superfamily domains	2/74	40/18670	0.0109678	0.0476734	0.0339579	IL7R/TBX21	2
BP	GO:2000008	regulation of protein localization to cell surface	2/74	40/18670	0.0109678	0.0476734	0.0339579	CD247/KCNAB2	2
BP	GO:0090279	regulation of calcium ion import	2/74	41/18670	0.0115009	0.0497255	0.0354196	CCL3/CXCL12	2
BP	GO:0150077	regulation of neuroinflammatory response	2/74	41/18670	0.0115009	0.0497255	0.0354196	CCL3/CST7	2
BP	GO:0043903	regulation of symbiosis, encompassing mutualism through parasitism	4/74	222/18670	0.0117053	0.0504752	0.0359536	CCL3/CCL4/CCL5/MDFIC	4
BP	GO:0002639	positive regulation of immunoglobulin production	2/74	42/18670	0.0120453	0.0514339	0.0366365	TBX21/MZB1	2
BP	GO:0010559	regulation of glycoprotein biosynthetic process	2/74	42/18670	0.0120453	0.0514339	0.0366365	CCR7/ITM2A	2
BP	GO:0097028	dendritic cell differentiation	2/74	42/18670	0.0120453	0.0514339	0.0366365	CCR7/IRF4	2
BP	GO:0002698	negative regulation of immune effector process	3/74	120/18670	0.0120538	0.0514339	0.0366365	IL7R/TBX21/CCR2	3
BP	GO:0031279	regulation of cyclase activity	2/74	43/18670	0.0126007	0.0534875	0.0380993	P2RY13/CCR2	2
BP	GO:0070296	sarcoplasmic reticulum calcium ion transport	2/74	43/18670	0.0126007	0.0534875	0.0380993	CCR5/CCL3	2
BP	GO:0051260	protein homooligomerization	5/74	351/18670	0.0127688	0.0540603	0.0385073	CD3E/CD247/CD79A/SMPD3/GBP5	5
BP	GO:0014013	regulation of gliogenesis	3/74	124/18670	0.0131623	0.0553159	0.0394017	IL6ST/CCL3/CCR2	3
BP	GO:0051101	regulation of DNA binding	3/74	124/18670	0.0131623	0.0553159	0.0394017	GZMA/IRF4/PYHIN1	3
BP	GO:0071622	regulation of granulocyte chemotaxis	2/74	44/18670	0.0131672	0.0553159	0.0394017	CCR7/CCL5	2
BP	GO:0006959	humoral immune response	5/74	356/18670	0.0135043	0.0565861	0.0403064	CCR7/SH2D1A/CXCL9/CCR2/IGLL5	5
BP	GO:0002820	negative regulation of adaptive immune response	2/74	45/18670	0.0137447	0.0571075	0.0406778	IL7R/TBX21	2
BP	GO:0032570	response to progesterone	2/74	45/18670	0.0137447	0.0571075	0.0406778	CD38/PTGER2	2
BP	GO:0045581	negative regulation of T cell differentiation	2/74	45/18670	0.0137447	0.0571075	0.0406778	RUNX3/TBX21	2
BP	GO:0097305	response to alcohol	4/74	233/18670	0.0137689	0.0571075	0.0406778	CCR5/CCR7/PTGER2/CCL3	4
BP	GO:0033628	regulation of cell adhesion mediated by integrin	2/74	46/18670	0.0143329	0.058848	0.0419176	CD3E/CCL5	2
BP	GO:0050706	regulation of interleukin-1 beta secretion	2/74	46/18670	0.0143329	0.058848	0.0419176	CCR7/CCL3	2
BP	GO:0051339	regulation of lyase activity	2/74	46/18670	0.0143329	0.058848	0.0419176	P2RY13/CCR2	2
BP	GO:0071354	cellular response to interleukin-6	2/74	46/18670	0.0143329	0.058848	0.0419176	IL6ST/SOCS3	2
BP	GO:0046638	positive regulation of alpha-beta T cell differentiation	2/74	47/18670	0.0149319	0.0611534	0.0435597	RUNX3/ZAP70	2
BP	GO:0030183	B cell differentiation	3/74	131/18670	0.0152382	0.0622515	0.0443419	CD79A/ITGA4/ITM2A	3
BP	GO:0001774	microglial cell activation	2/74	48/18670	0.0155416	0.0630169	0.0448871	CCL3/CST7	2
BP	GO:0002269	leukocyte activation involved in inflammatory response	2/74	48/18670	0.0155416	0.0630169	0.0448871	CCL3/CST7	2
BP	GO:0045912	negative regulation of carbohydrate metabolic process	2/74	48/18670	0.0155416	0.0630169	0.0448871	PLEK/SMPD3	2
BP	GO:0008347	glial cell migration	2/74	49/18670	0.0161618	0.0652074	0.0464474	CCL3/CCR2	2
BP	GO:1903018	regulation of glycoprotein metabolic process	2/74	49/18670	0.0161618	0.0652074	0.0464474	CCR7/ITM2A	2
BP	GO:0030010	establishment of cell polarity	3/74	135/18670	0.0165029	0.0664191	0.0473104	CCR7/UST/DOCK8	3
BP	GO:0046425	regulation of JAK-STAT cascade	3/74	137/18670	0.0171567	0.0688804	0.0490637	IL6ST/CCL5/SOCS3	3
BP	GO:0001954	positive regulation of cell-matrix adhesion	2/74	51/18670	0.0174336	0.0698202	0.0497331	CD3E/CCR7	2
BP	GO:0045637	regulation of myeloid cell differentiation	4/74	251/18670	0.0176204	0.0703953	0.0501427	GP1BA/PRKCQ/CCL3/GPR171	4
BP	GO:0002700	regulation of production of molecular mediator of immune response	3/74	139/18670	0.0178249	0.0710381	0.0506006	TBX21/MZB1/CCR2	3
BP	GO:0031529	ruffle organization	2/74	52/18670	0.018085	0.0715499	0.0509652	CCR7/PLEK	2
BP	GO:0032653	regulation of interleukin-10 production	2/74	52/18670	0.018085	0.0715499	0.0509652	IRF4/TIGIT	2
BP	GO:0032731	positive regulation of interleukin-1 beta production	2/74	52/18670	0.018085	0.0715499	0.0509652	CCL3/PYHIN1	2
BP	GO:1901653	cellular response to peptide	5/74	385/18670	0.01834	0.0723829	0.0515585	ITGA4/PRKCQ/SOCS3/MZB1/SMPD3	5
BP	GO:0008286	insulin receptor signaling pathway	3/74	141/18670	0.0185075	0.0728676	0.0519037	PRKCQ/SOCS3/MZB1	3
BP	GO:0045661	regulation of myoblast differentiation	2/74	53/18670	0.0187466	0.0732781	0.0521961	CXCL9/CXCL14	2
BP	GO:0045744	negative regulation of G protein-coupled receptor signaling pathway	2/74	53/18670	0.0187466	0.0732781	0.0521961	PLEK/CCL5	2
BP	GO:0050704	regulation of interleukin-1 secretion	2/74	53/18670	0.0187466	0.0732781	0.0521961	CCR7/CCL3	2
BP	GO:0050730	regulation of peptidyl-tyrosine phosphorylation	4/74	256/18670	0.0187981	0.0733038	0.0522144	CD3E/IL6ST/CCL5/SOCS3	4
BP	GO:0050871	positive regulation of B cell activation	3/74	142/18670	0.0188542	0.0733467	0.052245	CD38/TBX21/IGLL5	3
BP	GO:0070206	protein trimerization	2/74	54/18670	0.0194183	0.0753615	0.0536802	CD247/TRIM22	2
BP	GO:1902107	positive regulation of leukocyte differentiation	3/74	144/18670	0.0195584	0.0757247	0.0539389	RUNX3/IL7R/ZAP70	3
BP	GO:0032613	interleukin-10 production	2/74	55/18670	0.0201	0.0770895	0.054911	IRF4/TIGIT	2
BP	GO:0043030	regulation of macrophage activation	2/74	55/18670	0.0201	0.0770895	0.054911	CCL3/CST7	2
BP	GO:0043551	regulation of phosphatidylinositol 3-kinase activity	2/74	55/18670	0.0201	0.0770895	0.054911	CCR7/SOCS3	2
BP	GO:0045620	negative regulation of lymphocyte differentiation	2/74	55/18670	0.0201	0.0770895	0.054911	RUNX3/TBX21	2
BP	GO:0061041	regulation of wound healing	3/74	148/18670	0.0210101	0.0803112	0.0572059	GP1BA/PLEK/PRKCQ	3
BP	GO:1903532	positive regulation of secretion by cell	5/74	399/18670	0.0210386	0.0803112	0.0572059	CD2/CD38/CCL3/CXCL12/SMPD3	5
BP	GO:0008277	regulation of G protein-coupled receptor signaling pathway	3/74	149/18670	0.021382	0.0812418	0.0578687	PLEK/RGS16/CCL5	3
BP	GO:0051092	positive regulation of NF-kappaB transcription factor activity	3/74	149/18670	0.021382	0.0812418	0.0578687	PRKCQ/IL18RAP/TRIM22	3
BP	GO:0050777	negative regulation of immune response	3/74	150/18670	0.0217576	0.0824765	0.0587482	IL7R/TBX21/CCR2	3
BP	GO:0031663	lipopolysaccharide-mediated signaling pathway	2/74	58/18670	0.0222045	0.0837808	0.0596773	CCL3/CCL5	2
BP	GO:0061900	glial cell activation	2/74	58/18670	0.0222045	0.0837808	0.0596773	CCL3/CST7	2
BP	GO:0030168	platelet activation	3/74	153/18670	0.022906	0.0855114	0.06091	GP1BA/PLEK/PRKCQ	3
BP	GO:0010518	positive regulation of phospholipase activity	2/74	59/18670	0.0229255	0.0855114	0.06091	ITK/CCL5	2
BP	GO:0032732	positive regulation of interleukin-1 production	2/74	59/18670	0.0229255	0.0855114	0.06091	CCL3/PYHIN1	2
BP	GO:0042130	negative regulation of T cell proliferation	2/74	59/18670	0.0229255	0.0855114	0.06091	SPN/PLA2G2D	2
BP	GO:0043388	positive regulation of DNA binding	2/74	59/18670	0.0229255	0.0855114	0.06091	IRF4/PYHIN1	2
BP	GO:0030888	regulation of B cell proliferation	2/74	61/18670	0.0243961	0.0905822	0.0645219	CD38/MZB1	2
BP	GO:0034113	heterotypic cell-cell adhesion	2/74	61/18670	0.0243961	0.0905822	0.0645219	CD2/ITGA4	2
BP	GO:0002260	lymphocyte homeostasis	2/74	62/18670	0.0251456	0.0931529	0.066353	TNFRSF17/SIT1	2
BP	GO:0002637	regulation of immunoglobulin production	2/74	63/18670	0.0259044	0.0955298	0.0680461	TBX21/MZB1	2
BP	GO:0034394	protein localization to cell surface	2/74	63/18670	0.0259044	0.0955298	0.0680461	CD247/KCNAB2	2
BP	GO:0043550	regulation of lipid kinase activity	2/74	64/18670	0.0266725	0.0979192	0.0697481	CCR7/SOCS3	2
BP	GO:1900449	regulation of glutamate receptor signaling pathway	2/74	64/18670	0.0266725	0.0979192	0.0697481	RASGRF1/CCR2	2
CC	GO:0009897	external side of plasma membrane	16/78	393/19717	2.55554e-12	3.39887e-10	3.22805e-10	CD2/CD3E/CD5/CD8A/CD79A/CCR5/CCR7/GP1BA/IL6ST/IL7R/CXCL9/CXCL12/CXCR6/FCRL6/CCR2/IGLL5	16
CC	GO:0098802	plasma membrane receptor complex	9/78	295/19717	2.45676e-06	0.000163375	0.000155164	CD3E/CD247/CD8A/CD8B/CD79A/IL6ST/ITGA4/ZAP70/IL18RAP	9
CC	GO:0001772	immunological synapse	4/78	36/19717	1.21238e-05	0.000537487	0.000510475	CD3E/GZMA/PRKCQ/ZAP70	4
CC	GO:0042101	T cell receptor complex	5/78	127/19717	0.000148473	0.00493671	0.00468861	CD3E/CD247/CD8A/CD8B/ZAP70	5
MF	GO:0042379	chemokine receptor binding	9/75	66/17697	8.1956e-12	1.71288e-09	1.40619e-09	CXCL9/CCL3/CCL4/CCL5/CCL18/CXCL12/CXCL14/CCL4L1/CCR2	9
MF	GO:0008009	chemokine activity	8/75	49/17697	2.7813e-11	2.90646e-09	2.38606e-09	CXCL9/CCL3/CCL4/CCL5/CCL18/CXCL12/CXCL14/CCL4L1	8
MF	GO:0048020	CCR chemokine receptor binding	6/75	43/17697	2.54427e-08	1.77251e-06	1.45514e-06	CCL3/CCL4/CCL5/CCL18/CCL4L1/CCR2	6
MF	GO:0004896	cytokine receptor activity	7/75	96/17697	1.62712e-07	8.5017e-06	6.97949e-06	CCR5/CCR7/IL6ST/IL7R/IL18RAP/CXCR6/CCR2	7
MF	GO:0019956	chemokine binding	5/75	32/17697	2.19917e-07	9.19253e-06	7.54663e-06	CCR5/CCR7/ITGA4/CXCR6/CCR2	5
MF	GO:0005126	cytokine receptor binding	10/75	286/17697	3.4105e-07	1.18799e-05	9.75284e-06	IL6ST/CXCL9/CCL3/CCL4/CCL5/CCL18/CXCL12/CXCL14/CCL4L1/CCR2	10
MF	GO:0015026	coreceptor activity	5/75	44/17697	1.13999e-06	3.40367e-05	2.79425e-05	CD8A/CD8B/CCR5/ITGA4/CXCR6	5
MF	GO:0016493	C-C chemokine receptor activity	4/75	23/17697	2.47841e-06	6.19594e-05	5.08657e-05	CCR5/CCR7/CXCR6/CCR2	4
MF	GO:0001664	G protein-coupled receptor binding	9/75	280/17697	2.75453e-06	6.19594e-05	5.08657e-05	CXCL9/CCL3/CCL4/CCL5/CCL18/CXCL12/CXCL14/CCL4L1/CCR2	9
MF	GO:0019957	C-C chemokine binding	4/75	24/17697	2.96456e-06	6.19594e-05	5.08657e-05	CCR5/CCR7/CXCR6/CCR2	4
MF	GO:0005125	cytokine activity	8/75	220/17697	4.14363e-06	6.66266e-05	5.46972e-05	CXCL9/CCL3/CCL4/CCL5/CCL18/CXCL12/CXCL14/CCL4L1	8
MF	GO:0001637	G protein-coupled chemoattractant receptor activity	4/75	26/17697	4.14424e-06	6.66266e-05	5.46972e-05	CCR5/CCR7/CXCR6/CCR2	4
MF	GO:0004950	chemokine receptor activity	4/75	26/17697	4.14424e-06	6.66266e-05	5.46972e-05	CCR5/CCR7/CXCR6/CCR2	4
MF	GO:0019955	cytokine binding	6/75	128/17697	1.70365e-05	0.000254331	0.000208793	CCR5/CCR7/IL6ST/ITGA4/CXCR6/CCR2	6
MF	GO:0008528	G protein-coupled peptide receptor activity	5/75	146/17697	0.000387215	0.0053952	0.0044292	CCR5/CCR7/GP1BA/CXCR6/CCR2	5
MF	GO:0001653	peptide receptor activity	5/75	152/17697	0.000465654	0.0060826	0.00499352	CCR5/CCR7/GP1BA/CXCR6/CCR2	5
MF	GO:0042287	MHC protein binding	3/75	40/17697	0.000645319	0.00793363	0.00651313	CD8A/CD8B/FCRL6	3
MF	GO:0004620	phospholipase activity	4/75	102/17697	0.000923835	0.0101846	0.00836107	CCR5/CCL5/PLA2G2D/SMPD3	4
MF	GO:0045236	CXCR chemokine receptor binding	2/75	11/17697	0.000950888	0.0101846	0.00836107	CXCL9/CXCL12	2
MF	GO:0048018	receptor ligand activity	8/75	482/17697	0.000974603	0.0101846	0.00836107	CXCL9/CCL3/CCL4/CCL5/CCL18/CXCL12/CXCL14/CCL4L1	8
MF	GO:0016004	phospholipase activator activity	2/75	12/17697	0.00113794	0.0113252	0.00929742	CCL3/CCL5	2
MF	GO:0001608	G protein-coupled nucleotide receptor activity	2/75	13/17697	0.00134115	0.0121869	0.0100049	GPR171/P2RY13	2
MF	GO:0045028	G protein-coupled purinergic nucleotide receptor activity	2/75	13/17697	0.00134115	0.0121869	0.0100049	GPR171/P2RY13	2
MF	GO:0060229	lipase activator activity	2/75	14/17697	0.00156038	0.0135883	0.0111554	CCL3/CCL5	2
MF	GO:0004697	protein kinase C activity	2/75	16/17697	0.00204638	0.0166789	0.0136925	PRKCQ/CCL3	2
MF	GO:0016298	lipase activity	4/75	127/17697	0.00207488	0.0166789	0.0136925	CCR5/CCL5/PLA2G2D/SMPD3	4
MF	GO:0001614	purinergic nucleotide receptor activity	2/75	20/17697	0.00320478	0.0230965	0.0189611	GPR171/P2RY13	2
MF	GO:0016502	nucleotide receptor activity	2/75	20/17697	0.00320478	0.0230965	0.0189611	GPR171/P2RY13	2
MF	GO:0042288	MHC class I protein binding	2/75	20/17697	0.00320478	0.0230965	0.0189611	CD8A/CD8B	2
MF	GO:0003823	antigen binding	4/75	160/17697	0.00475436	0.0331221	0.0271916	HLA-DRB5/IL7R/ITGA4/IGLL5	4
MF	GO:0035586	purinergic receptor activity	2/75	25/17697	0.00499139	0.0336516	0.0276264	GPR171/P2RY13	2
MF	GO:0004435	phosphatidylinositol phospholipase C activity	2/75	26/17697	0.00539257	0.0352202	0.0289141	CCR5/CCL5	2
MF	GO:0004629	phospholipase C activity	2/75	28/17697	0.00623778	0.039506	0.0324325	CCR5/CCL5	2
MF	GO:0008081	phosphoric diester hydrolase activity	3/75	94/17697	0.00743593	0.0457091	0.037525	CCR5/CCL5/SMPD3	3
MF	GO:0042169	SH2 domain binding	2/75	36/17697	0.0101718	0.06074	0.0498646	SIT1/LAX1	2
MF	GO:0042056	chemoattractant activity	2/75	38/17697	0.0112887	0.0655373	0.053803	CCL3/CCL5	2
MF	GO:0001784	phosphotyrosine residue binding	2/75	40/17697	0.0124571	0.0703661	0.0577672	ZAP70/SOCS3	2
MF	GO:0004715	non-membrane spanning protein tyrosine kinase activity	2/75	46/17697	0.0162621	0.0894417	0.0734273	ITK/ZAP70	2
KEGG	hsa04061	Viral protein interaction with cytokine and cytokine receptor	13/51	100/8076	2.33503e-14	2.45178e-12	1.99092e-12	CCR5/CCR7/IL6ST/CXCL9/CCL3/CCL4/CCL5/CCL18/CXCL12/IL18RAP/CXCL14/CCL4L1/CCR2	13
KEGG	hsa04060	Cytokine-cytokine receptor interaction	16/51	295/8076	1.51707e-11	7.96461e-10	6.4675e-10	TNFRSF17/CCR5/CCR7/IL6ST/IL7R/CXCL9/CCL3/CCL4/CCL5/CCL18/CXCL12/IL18RAP/CXCL14/CXCR6/CCL4L1/CCR2	16
KEGG	hsa04062	Chemokine signaling pathway	13/51	192/8076	1.11489e-10	3.9021e-09	3.16862e-09	CCR5/CCR7/ITK/CXCL9/CCL3/CCL4/CCL5/CCL18/CXCL12/CXCL14/CXCR6/CCL4L1/CCR2	13
KEGG	hsa04640	Hematopoietic cell lineage	10/51	99/8076	4.07015e-10	1.06842e-08	8.67585e-09	CD2/CD3E/CD5/CD8A/CD8B/CD38/GP1BA/HLA-DRB5/IL7R/ITGA4	10
KEGG	hsa05340	Primary immunodeficiency	6/51	38/8076	1.10889e-07	2.32866e-06	1.89095e-06	CD3E/CD8A/CD8B/CD79A/IL7R/ZAP70	6
KEGG	hsa04659	Th17 cell differentiation	8/51	107/8076	2.89673e-07	5.06928e-06	4.11641e-06	CD3E/CD247/HLA-DRB5/IL6ST/IRF4/PRKCQ/ZAP70/TBX21	8
KEGG	hsa04658	Th1 and Th2 cell differentiation	7/51	92/8076	1.52245e-06	2.28367e-05	1.85441e-05	RUNX3/CD3E/CD247/HLA-DRB5/PRKCQ/ZAP70/TBX21	7
KEGG	hsa04660	T cell receptor signaling pathway	7/51	104/8076	3.48529e-06	4.57445e-05	3.71459e-05	CD3E/CD247/CD8A/CD8B/ITK/PRKCQ/ZAP70	7
KEGG	hsa04514	Cell adhesion molecules	7/51	149/8076	3.70664e-05	0.000432441	0.000351155	CD2/CD8A/CD8B/HLA-DRB5/ITGA4/SPN/TIGIT	7
KEGG	hsa04672	Intestinal immune network for IgA production	4/51	49/8076	0.000242406	0.00254526	0.00206683	TNFRSF17/HLA-DRB5/ITGA4/CXCL12	4
KEGG	hsa04064	NF-kappa B signaling pathway	5/51	104/8076	0.000471971	0.0039066	0.00317228	PRKCQ/CCL4/CXCL12/ZAP70/CCL4L1	5
KEGG	hsa04620	Toll-like receptor signaling pathway	5/51	104/8076	0.000471971	0.0039066	0.00317228	CXCL9/CCL3/CCL4/CCL5/CCL4L1	5
KEGG	hsa05163	Human cytomegalovirus infection	7/51	225/8076	0.000483675	0.0039066	0.00317228	CCR5/PTGER2/CCL3/CCL4/CCL5/CXCL12/CCL4L1	7
KEGG	hsa05235	PD-L1 expression and PD-1 checkpoint pathway in cancer	4/51	89/8076	0.0023204	0.017403	0.0141318	CD3E/CD247/PRKCQ/ZAP70	4
KEGG	hsa05323	Rheumatoid arthritis	4/51	93/8076	0.00272389	0.0190672	0.0154832	HLA-DRB5/CCL3/CCL5/CXCL12	4
KEGG	hsa05142	Chagas disease	4/51	102/8076	0.00380295	0.0249569	0.0202657	CD3E/CD247/CCL3/CCL5	4
KEGG	hsa04623	Cytosolic DNA-sensing pathway	3/51	63/8076	0.00721899	0.0445879	0.0362067	CCL4/CCL5/CCL4L1	3
KEGG	hsa05321	Inflammatory bowel disease	3/51	65/8076	0.00787075	0.0459127	0.0372825	HLA-DRB5/IL18RAP/TBX21	3
KEGG	hsa05135	Yersinia infection	4/51	137/8076	0.010695	0.0591039	0.0479942	CD8A/CD8B/ITGA4/ZAP70	4
KEGG	hsa04612	Antigen processing and presentation	3/51	78/8076	0.0129454	0.0679636	0.0551885	CD8A/CD8B/HLA-DRB5	3

## Sheet: yellow enrich
Enrichment result of signature genes in yellow module
ONTOLOGY	ID	Description	GeneRatio	BgRatio	pvalue	p.adjust	qvalue	geneID	Count
BP	GO:0140014	mitotic nuclear division	12/33	264/18670	1.35669e-14	1.48965e-11	9.25407e-12	CCNB1/HSPA1B/KIFC1/MYBL2/PTTG1/MAD2L1BP/TACC3/UBE2C/SIRT2/UBE2S/CDT1/CDC26	12
BP	GO:0000280	nuclear division	12/33	407/18670	2.30134e-12	1.26343e-09	7.84877e-10	CCNB1/HSPA1B/KIFC1/MYBL2/PTTG1/MAD2L1BP/TACC3/UBE2C/SIRT2/UBE2S/CDT1/CDC26	12
BP	GO:0048285	organelle fission	12/33	449/18670	7.26447e-12	2.2064e-09	1.37067e-09	CCNB1/HSPA1B/KIFC1/MYBL2/PTTG1/MAD2L1BP/TACC3/UBE2C/SIRT2/UBE2S/CDT1/CDC26	12
BP	GO:0007088	regulation of mitotic nuclear division	9/33	164/18670	8.03788e-12	2.2064e-09	1.37067e-09	CCNB1/HSPA1B/PTTG1/MAD2L1BP/TACC3/UBE2C/SIRT2/CDT1/CDC26	9
BP	GO:0051783	regulation of nuclear division	9/33	188/18670	2.75043e-11	6.03994e-09	3.75216e-09	CCNB1/HSPA1B/PTTG1/MAD2L1BP/TACC3/UBE2C/SIRT2/CDT1/CDC26	9
BP	GO:0031145	anaphase-promoting complex-dependent catabolic process	6/33	81/18670	5.57198e-09	1.01967e-06	6.33446e-07	CCNB1/CDK1/PTTG1/UBE2C/UBE2S/CDC26	6
BP	GO:0051983	regulation of chromosome segregation	6/33	103/18670	2.38865e-08	3.74677e-06	2.32759e-06	CCNB1/PTTG1/TACC3/SIRT2/CDT1/CDC26	6
BP	GO:0010965	regulation of mitotic sister chromatid separation	5/33	57/18670	4.92848e-08	6.76434e-06	4.20218e-06	CCNB1/PTTG1/TACC3/CDT1/CDC26	5
BP	GO:0051306	mitotic sister chromatid separation	5/33	60/18670	6.40445e-08	7.3397e-06	4.55961e-06	CCNB1/PTTG1/TACC3/CDT1/CDC26	5
BP	GO:0007059	chromosome segregation	8/33	321/18670	6.68461e-08	7.3397e-06	4.55961e-06	CCNB1/KIFC1/PTTG1/TACC3/SIRT2/CDT1/CDC26/CENPW	8
BP	GO:1905818	regulation of chromosome separation	5/33	62/18670	7.56926e-08	7.55549e-06	4.69366e-06	CCNB1/PTTG1/TACC3/CDT1/CDC26	5
BP	GO:0010498	proteasomal protein catabolic process	9/33	477/18670	9.61657e-08	8.79916e-06	5.46626e-06	CCNB1/CDK1/HSPA1B/PTTG1/BAG2/UBE2C/SIRT2/UBE2S/CDC26	9
BP	GO:0033047	regulation of mitotic sister chromatid segregation	5/33	68/18670	1.21021e-07	1.02216e-05	6.34992e-06	CCNB1/PTTG1/TACC3/CDT1/CDC26	5
BP	GO:0070979	protein K11-linked ubiquitination	4/33	30/18670	2.14534e-07	1.68256e-05	1.04525e-05	UBE2C/UBE2S/UBE2T/CDC26	4
BP	GO:0000070	mitotic sister chromatid segregation	6/33	151/18670	2.3431e-07	1.68825e-05	1.04878e-05	CCNB1/KIFC1/PTTG1/TACC3/CDT1/CDC26	6
BP	GO:0010458	exit from mitosis	4/33	31/18670	2.46011e-07	1.68825e-05	1.04878e-05	MAD2L1BP/UBE2C/SIRT2/UBE2S	4
BP	GO:0033045	regulation of sister chromatid segregation	5/33	80/18670	2.74936e-07	1.77576e-05	1.10315e-05	CCNB1/PTTG1/TACC3/CDT1/CDC26	5
BP	GO:0098813	nuclear chromosome segregation	7/33	262/18670	3.09432e-07	1.88753e-05	1.17258e-05	CCNB1/KIFC1/PTTG1/TACC3/SIRT2/CDT1/CDC26	7
BP	GO:0007051	spindle organization	6/33	170/18670	4.71289e-07	2.67178e-05	1.65978e-05	CCNB1/HSPA1B/KIFC1/MYBL2/TACC3/CENPW	6
BP	GO:0051304	chromosome separation	5/33	90/18670	4.96377e-07	2.67178e-05	1.65978e-05	CCNB1/PTTG1/TACC3/CDT1/CDC26	5
BP	GO:0043161	proteasome-mediated ubiquitin-dependent protein catabolic process	8/33	419/18670	5.10997e-07	2.67178e-05	1.65978e-05	CCNB1/CDK1/HSPA1B/PTTG1/UBE2C/SIRT2/UBE2S/CDC26	8
BP	GO:0000819	sister chromatid segregation	6/33	189/18670	8.77049e-07	4.37727e-05	2.71927e-05	CCNB1/KIFC1/PTTG1/TACC3/CDT1/CDC26	6
BP	GO:0007077	mitotic nuclear envelope disassembly	3/33	12/18670	1.09489e-06	5.13258e-05	3.18849e-05	CCNB1/CDK1/CCNB2	3
BP	GO:0007052	mitotic spindle organization	5/33	106/18670	1.12188e-06	5.13258e-05	3.18849e-05	CCNB1/HSPA1B/KIFC1/MYBL2/TACC3	5
BP	GO:0007091	metaphase/anaphase transition of mitotic cell cycle	4/33	54/18670	2.40292e-06	0.000105536	6.55619e-05	CCNB1/TACC3/CDT1/CDC26	4
BP	GO:0030397	membrane disassembly	3/33	16/18670	2.77359e-06	0.000109165	6.78158e-05	CCNB1/CDK1/CCNB2	3
BP	GO:0051081	nuclear envelope disassembly	3/33	16/18670	2.77359e-06	0.000109165	6.78158e-05	CCNB1/CDK1/CCNB2	3
BP	GO:0044784	metaphase/anaphase transition of cell cycle	4/33	56/18670	2.7838e-06	0.000109165	6.78158e-05	CCNB1/TACC3/CDT1/CDC26	4
BP	GO:1902850	microtubule cytoskeleton organization involved in mitosis	5/33	131/18670	3.19302e-06	0.000120894	7.51026e-05	CCNB1/HSPA1B/KIFC1/MYBL2/TACC3	5
BP	GO:0007096	regulation of exit from mitosis	3/33	19/18670	4.78198e-06	0.000175021	0.000108727	MAD2L1BP/UBE2C/SIRT2	3
BP	GO:1904666	regulation of ubiquitin protein ligase activity	3/33	22/18670	7.57242e-06	0.00026821	0.000166619	BAG2/UBE2C/UBE2S	3
BP	GO:1901990	regulation of mitotic cell cycle phase transition	7/33	444/18670	1.0263e-05	0.000352148	0.000218763	CCNB1/CDK1/MAD2L1BP/UBE2C/SIRT2/CDT1/CDC26	7
BP	GO:0051984	positive regulation of chromosome segregation	3/33	28/18670	1.59925e-05	0.000532116	0.000330564	CCNB1/SIRT2/CDT1	3
BP	GO:1901987	regulation of cell cycle phase transition	7/33	480/18670	1.70032e-05	0.000549104	0.000341117	CCNB1/CDK1/MAD2L1BP/UBE2C/SIRT2/CDT1/CDC26	7
BP	GO:1901992	positive regulation of mitotic cell cycle phase transition	4/33	91/18670	1.93946e-05	0.000608435	0.000377975	CCNB1/CDK1/UBE2C/CDT1	4
BP	GO:0071103	DNA conformation change	6/33	327/18670	2.04917e-05	0.000624997	0.000388264	CCNB1/CDK1/HMGA1/GINS2/CENPM/CENPW	6
BP	GO:0008608	attachment of spindle microtubules to kinetochore	3/33	32/18670	2.4097e-05	0.000715094	0.000444234	CCNB1/SIRT2/CDT1	3
BP	GO:0033044	regulation of chromosome organization	6/33	342/18670	2.63753e-05	0.000762107	0.00047344	CCNB1/HMGA1/PTTG1/TACC3/CDT1/CDC26	6
BP	GO:0006323	DNA packaging	5/33	210/18670	3.1526e-05	0.000887578	0.000551386	CCNB1/CDK1/HMGA1/CENPM/CENPW	5
BP	GO:0045740	positive regulation of DNA replication	3/33	36/18670	3.45212e-05	0.000947571	0.000588655	CDK1/CACYBP/CDT1	3
BP	GO:1901989	positive regulation of cell cycle phase transition	4/33	106/18670	3.53829e-05	0.000947571	0.000588655	CCNB1/CDK1/UBE2C/CDT1	4
BP	GO:0051225	spindle assembly	4/33	108/18670	3.8076e-05	0.000995415	0.000618377	HSPA1B/KIFC1/MYBL2/CENPW	4
BP	GO:2000816	negative regulation of mitotic sister chromatid separation	3/33	39/18670	4.40268e-05	0.00112422	0.000698394	CCNB1/PTTG1/CDT1	3
BP	GO:1905819	negative regulation of chromosome separation	3/33	40/18670	4.75393e-05	0.00118632	0.000736973	CCNB1/PTTG1/CDT1	3
BP	GO:0033048	negative regulation of mitotic sister chromatid segregation	3/33	42/18670	5.51051e-05	0.00134456	0.000835277	CCNB1/PTTG1/CDT1	3
BP	GO:0007080	mitotic metaphase plate congression	3/33	44/18670	6.34195e-05	0.00148159	0.000920399	CCNB1/KIFC1/CDT1	3
BP	GO:0033046	negative regulation of sister chromatid segregation	3/33	44/18670	6.34195e-05	0.00148159	0.000920399	CCNB1/PTTG1/CDT1	3
BP	GO:0051985	negative regulation of chromosome segregation	3/33	45/18670	6.78677e-05	0.00155247	0.000964435	CCNB1/PTTG1/CDT1	3
BP	GO:0030071	regulation of mitotic metaphase/anaphase transition	3/33	51/18670	9.88845e-05	0.00221315	0.00137487	CCNB1/CDT1/CDC26	3
BP	GO:0006998	nuclear envelope organization	3/33	52/18670	0.000104812	0.00221315	0.00137487	CCNB1/CDK1/CCNB2	3
BP	GO:0045839	negative regulation of mitotic nuclear division	3/33	52/18670	0.000104812	0.00221315	0.00137487	CCNB1/PTTG1/CDT1	3
BP	GO:0051438	regulation of ubiquitin-protein transferase activity	3/33	52/18670	0.000104812	0.00221315	0.00137487	BAG2/UBE2C/UBE2S	3
BP	GO:1902099	regulation of metaphase/anaphase transition of cell cycle	3/33	53/18670	0.000110967	0.00226249	0.00140552	CCNB1/CDT1/CDC26	3
BP	GO:0006260	DNA replication	5/33	274/18670	0.00011127	0.00226249	0.00140552	CDK1/HMGA1/CACYBP/GINS2/CDT1	5
BP	GO:2001251	negative regulation of chromosome organization	4/33	146/18670	0.000123102	0.00245756	0.0015267	CCNB1/HMGA1/PTTG1/CDT1	4
BP	GO:0090307	mitotic spindle assembly	3/33	56/18670	0.000130835	0.00256529	0.00159362	HSPA1B/KIFC1/MYBL2	3
BP	GO:1903862	positive regulation of oxidative phosphorylation	2/33	10/18670	0.000135134	0.0026031	0.00161711	CCNB1/CDK1	2
BP	GO:0051310	metaphase plate congression	3/33	57/18670	0.000137937	0.00261129	0.0016222	CCNB1/KIFC1/CDT1	3
BP	GO:0051784	negative regulation of nuclear division	3/33	60/18670	0.000160738	0.00296965	0.00184482	CCNB1/PTTG1/CDT1	3
BP	GO:0090068	positive regulation of cell cycle process	5/33	298/18670	0.000164789	0.00296965	0.00184482	CCNB1/CDK1/UBE2C/SIRT2/CDT1	5
BP	GO:0055015	ventricular cardiac muscle cell development	2/33	11/18670	0.000164981	0.00296965	0.00184482	CCNB1/CDK1	2
BP	GO:0045931	positive regulation of mitotic cell cycle	4/33	163/18670	0.000188072	0.00333069	0.00206911	CCNB1/CDK1/UBE2C/CDT1	4
BP	GO:0007093	mitotic cell cycle checkpoint	4/33	165/18670	0.000197073	0.00334059	0.00207526	CCNB1/CDK1/MAD2L1BP/CDT1	4
BP	GO:0051988	regulation of attachment of spindle microtubules to kinetochore	2/33	12/18670	0.000197758	0.00334059	0.00207526	CCNB1/SIRT2	2
BP	GO:1904668	positive regulation of ubiquitin protein ligase activity	2/33	12/18670	0.000197758	0.00334059	0.00207526	UBE2C/UBE2S	2
BP	GO:0051785	positive regulation of nuclear division	3/33	66/18670	0.000213397	0.00355016	0.00220545	UBE2C/SIRT2/CDT1	3
BP	GO:0090231	regulation of spindle checkpoint	2/33	14/18670	0.000272064	0.00432936	0.00268951	CCNB1/CDT1	2
BP	GO:0090266	regulation of mitotic cell cycle spindle assembly checkpoint	2/33	14/18670	0.000272064	0.00432936	0.00268951	CCNB1/CDT1	2
BP	GO:1903504	regulation of mitotic spindle checkpoint	2/33	14/18670	0.000272064	0.00432936	0.00268951	CCNB1/CDT1	2
BP	GO:0045930	negative regulation of mitotic cell cycle	5/33	338/18670	0.000295385	0.00463333	0.00287834	CCNB1/CDK1/PTTG1/MAD2L1BP/CDT1	5
BP	GO:0051303	establishment of chromosome localization	3/33	75/18670	0.000311506	0.00481737	0.00299267	CCNB1/KIFC1/CDT1	3
BP	GO:0050000	chromosome localization	3/33	76/18670	0.000323917	0.00493974	0.00306869	CCNB1/KIFC1/CDT1	3
BP	GO:0055012	ventricular cardiac muscle cell differentiation	2/33	16/18670	0.000357972	0.00538429	0.00334486	CCNB1/CDK1	2
BP	GO:0009141	nucleoside triphosphate metabolic process	5/33	362/18670	0.000404701	0.00585484	0.00363718	CCNB1/CDK1/HSPA1B/NUDT1/UCK2	5
BP	GO:0034501	protein localization to kinetochore	2/33	17/18670	0.000405253	0.00585484	0.00363718	CDK1/CDT1	2
BP	GO:0035729	cellular response to hepatocyte growth factor stimulus	2/33	17/18670	0.000405253	0.00585484	0.00363718	VIL1/SIRT2	2
BP	GO:0031396	regulation of protein ubiquitination	4/33	204/18670	0.000441815	0.00630017	0.00391382	HSPA1B/BAG2/UBE2C/UBE2S	4
BP	GO:0035728	response to hepatocyte growth factor	2/33	19/18670	0.000508421	0.007157	0.00444611	VIL1/SIRT2	2
BP	GO:0045732	positive regulation of protein catabolic process	4/33	214/18670	0.000529161	0.00735467	0.00456891	GPC3/HSPA1B/BAG2/SIRT2	4
BP	GO:0000075	cell cycle checkpoint	4/33	216/18670	0.000548004	0.00752136	0.00467246	CCNB1/CDK1/MAD2L1BP/CDT1	4
BP	GO:0045787	positive regulation of cell cycle	5/33	389/18670	0.000561655	0.00761355	0.00472973	CCNB1/CDK1/UBE2C/SIRT2/CDT1	5
BP	GO:0010639	negative regulation of organelle organization	5/33	395/18670	0.000602018	0.00806117	0.0050078	CCNB1/HMGA1/VIL1/PTTG1/CDT1	5
BP	GO:0051383	kinetochore organization	2/33	21/18670	0.000622997	0.00814346	0.00505892	CDT1/CENPW	2
BP	GO:0071459	protein localization to chromosome, centromeric region	2/33	21/18670	0.000622997	0.00814346	0.00505892	CDK1/CDT1	2
BP	GO:0006457	protein folding	4/33	227/18670	0.000660289	0.00852938	0.00529867	GNAZ/HSPA1B/HSPB1/BAG2	4
BP	GO:1903320	regulation of protein modification by small protein conjugation or removal	4/33	231/18670	0.000704894	0.00899969	0.00559084	HSPA1B/BAG2/UBE2C/UBE2S	4
BP	GO:0000079	regulation of cyclin-dependent protein serine/threonine kinase activity	3/33	102/18670	0.00076679	0.00967742	0.00601186	CCNB1/CDKN3/CCNB2	3
BP	GO:1901800	positive regulation of proteasomal protein catabolic process	3/33	104/18670	0.000811301	0.0101228	0.00628856	HSPA1B/BAG2/SIRT2	3
BP	GO:1904029	regulation of cyclin-dependent protein kinase activity	3/33	106/18670	0.000857426	0.0105781	0.0065714	CCNB1/CDKN3/CCNB2	3
BP	GO:0006275	regulation of DNA replication	3/33	108/18670	0.000905187	0.0110433	0.00686036	CDK1/CACYBP/CDT1	3
BP	GO:0001556	oocyte maturation	2/33	26/18670	0.000958848	0.0115694	0.0071872	CCNB1/SIRT2	2
BP	GO:0010971	positive regulation of G2/M transition of mitotic cell cycle	2/33	27/18670	0.00103441	0.0123455	0.00766932	CCNB1/CDK1	2
BP	GO:0006979	response to oxidative stress	5/33	451/18670	0.00109237	0.012897	0.00801192	CDK1/HSPA1B/HSPB1/NUDT1/SIRT2	5
BP	GO:1903052	positive regulation of proteolysis involved in cellular protein catabolic process	3/33	120/18670	0.00122737	0.0143368	0.00890637	HSPA1B/BAG2/SIRT2	3
BP	GO:1902751	positive regulation of cell cycle G2/M phase transition	2/33	30/18670	0.00127772	0.0147678	0.00917411	CCNB1/CDK1	2
BP	GO:0002082	regulation of oxidative phosphorylation	2/33	31/18670	0.00136433	0.0154437	0.009594	CCNB1/CDK1	2
BP	GO:0043457	regulation of cellular respiration	2/33	31/18670	0.00136433	0.0154437	0.009594	CCNB1/CDK1	2
BP	GO:0000082	G1/S transition of mitotic cell cycle	4/33	279/18670	0.00141968	0.0159062	0.00988135	CCNB1/CDK1/CDKN3/CDT1	4
BP	GO:1901976	regulation of cell cycle checkpoint	2/33	32/18670	0.00145368	0.0161226	0.0100158	CCNB1/CDT1	2
BP	GO:0051258	protein polymerization	4/33	283/18670	0.00149589	0.0164248	0.0102035	HSPA1B/VIL1/UBE2C/UBE2S	4
BP	GO:0006997	nucleus organization	3/33	130/18670	0.00154489	0.0166396	0.010337	CCNB1/CDK1/CCNB2	3
BP	GO:0051443	positive regulation of ubiquitin-protein transferase activity	2/33	33/18670	0.00154576	0.0166396	0.010337	UBE2C/UBE2S	2
BP	GO:0071824	protein-DNA complex subunit organization	4/33	288/18670	0.00159511	0.016679	0.0103614	HMGA1/CENPM/CDT1/CENPW	4
BP	GO:0055007	cardiac muscle cell differentiation	3/33	132/18670	0.00161399	0.016679	0.0103614	CCNB1/CDK1/CACYBP	3
BP	GO:0007094	mitotic spindle assembly checkpoint	2/33	34/18670	0.00164056	0.016679	0.0103614	CCNB1/CDT1	2
BP	GO:0031577	spindle checkpoint	2/33	34/18670	0.00164056	0.016679	0.0103614	CCNB1/CDT1	2
BP	GO:0071173	spindle assembly checkpoint	2/33	34/18670	0.00164056	0.016679	0.0103614	CCNB1/CDT1	2
BP	GO:0071174	mitotic spindle checkpoint	2/33	34/18670	0.00164056	0.016679	0.0103614	CCNB1/CDT1	2
BP	GO:0044843	cell cycle G1/S phase transition	4/33	298/18670	0.00180721	0.0182047	0.0113092	CCNB1/CDK1/CDKN3/CDT1	4
BP	GO:0045841	negative regulation of mitotic metaphase/anaphase transition	2/33	36/18670	0.00183827	0.0183493	0.011399	CCNB1/CDT1	2
BP	GO:0034599	cellular response to oxidative stress	4/33	302/18670	0.00189729	0.018534	0.0115138	CDK1/HSPA1B/HSPB1/SIRT2	4
BP	GO:1903364	positive regulation of cellular protein catabolic process	3/33	140/18670	0.0019097	0.018534	0.0115138	HSPA1B/BAG2/SIRT2	3
BP	GO:0014037	Schwann cell differentiation	2/33	37/18670	0.00194117	0.018534	0.0115138	CDK1/SIRT2	2
BP	GO:0060236	regulation of mitotic spindle organization	2/33	37/18670	0.00194117	0.018534	0.0115138	HSPA1B/TACC3	2
BP	GO:1902100	negative regulation of metaphase/anaphase transition of cell cycle	2/33	37/18670	0.00194117	0.018534	0.0115138	CCNB1/CDT1	2
BP	GO:0016572	histone phosphorylation	2/33	38/18670	0.00204675	0.0190452	0.0118314	CCNB1/CDK1	2
BP	GO:0050892	intestinal absorption	2/33	38/18670	0.00204675	0.0190452	0.0118314	VIL1/SLC26A6	2
BP	GO:0060045	positive regulation of cardiac muscle cell proliferation	2/33	38/18670	0.00204675	0.0190452	0.0118314	CCNB1/CDK1	2
BP	GO:0000209	protein polyubiquitination	4/33	310/18670	0.00208675	0.0192542	0.0119612	UBE2C/UBE2S/UBE2T/CDC26	4
BP	GO:0008643	carbohydrate transport	3/33	148/18670	0.00223722	0.0204706	0.0127168	GPC3/VIL1/SLC26A6	3
BP	GO:0007568	aging	4/33	321/18670	0.00236816	0.0214155	0.0133039	CDK1/HMGA1/NUDT1/CACYBP	4
BP	GO:0090224	regulation of spindle organization	2/33	41/18670	0.0023795	0.0214155	0.0133039	HSPA1B/TACC3	2
BP	GO:0016202	regulation of striated muscle tissue development	3/33	152/18670	0.00241327	0.0215429	0.013383	CCNB1/CDK1/SIRT2	3
BP	GO:0006261	DNA-dependent DNA replication	3/33	153/18670	0.00245859	0.0217704	0.0135243	HMGA1/GINS2/CDT1	3
BP	GO:1901861	regulation of muscle tissue development	3/33	155/18670	0.0025508	0.0224062	0.0139193	CCNB1/CDK1/SIRT2	3
BP	GO:0048634	regulation of muscle organ development	3/33	156/18670	0.0025977	0.0226371	0.0140627	CCNB1/CDK1/SIRT2	3
BP	GO:0031570	DNA integrity checkpoint	3/33	157/18670	0.00264513	0.0228689	0.0142068	CCNB1/CDK1/CDT1	3
BP	GO:0034080	CENP-A containing nucleosome assembly	2/33	44/18670	0.00273606	0.0232884	0.0144673	CENPM/CENPW	2
BP	GO:0061641	CENP-A containing chromatin organization	2/33	44/18670	0.00273606	0.0232884	0.0144673	CENPM/CENPW	2
BP	GO:0009199	ribonucleoside triphosphate metabolic process	4/33	341/18670	0.00294527	0.0248454	0.0154346	CCNB1/CDK1/HSPA1B/UCK2	4
BP	GO:0009144	purine nucleoside triphosphate metabolic process	4/33	342/18670	0.00297643	0.0248454	0.0154346	CCNB1/CDK1/HSPA1B/NUDT1	4
BP	GO:0048599	oocyte development	2/33	46/18670	0.00298688	0.0248454	0.0154346	CCNB1/SIRT2	2
BP	GO:0031497	chromatin assembly	3/33	165/18670	0.00304399	0.0251301	0.0156114	HMGA1/CENPM/CENPW	3
BP	GO:0030261	chromosome condensation	2/33	47/18670	0.00311619	0.025345	0.015745	CCNB1/CDK1	2
BP	GO:1903580	positive regulation of ATP metabolic process	2/33	47/18670	0.00311619	0.025345	0.015745	CCNB1/CDK1	2
BP	GO:0035051	cardiocyte differentiation	3/33	167/18670	0.00314917	0.0254249	0.0157946	CCNB1/CDK1/CACYBP	3
BP	GO:0031055	chromatin remodeling at centromere	2/33	48/18670	0.00324809	0.0258435	0.0160546	CENPM/CENPW	2
BP	GO:0055023	positive regulation of cardiac muscle tissue growth	2/33	48/18670	0.00324809	0.0258435	0.0160546	CCNB1/CDK1	2
BP	GO:0009161	ribonucleoside monophosphate metabolic process	4/33	354/18670	0.00336828	0.026607	0.0165289	CCNB1/CDK1/HSPA1B/UCK2	4
BP	GO:0070534	protein K63-linked ubiquitination	2/33	50/18670	0.00351964	0.027604	0.0171483	UBE2S/UBE2T	2
BP	GO:0010948	negative regulation of cell cycle process	4/33	361/18670	0.00361245	0.028131	0.0174757	CCNB1/CDK1/PTTG1/CDT1	4
BP	GO:0009994	oocyte differentiation	2/33	51/18670	0.00365926	0.0282948	0.0175775	CCNB1/SIRT2	2
BP	GO:0048469	cell maturation	3/33	177/18670	0.00370859	0.0283703	0.0176243	CCNB1/SIRT2/SLC26A6	3
BP	GO:0010038	response to metal ion	4/33	364/18670	0.0037207	0.0283703	0.0176243	CCNB1/CDK1/NUDT1/CACYBP	4
BP	GO:0060421	positive regulation of heart growth	2/33	52/18670	0.00380144	0.028786	0.0178826	CCNB1/CDK1	2
BP	GO:0045840	positive regulation of mitotic nuclear division	2/33	53/18670	0.00394616	0.0296773	0.0184363	UBE2C/CDT1	2
BP	GO:0006338	chromatin remodeling	3/33	182/18670	0.00400966	0.0298811	0.0185629	HMGA1/CENPM/CENPW	3
BP	GO:0061136	regulation of proteasomal protein catabolic process	3/33	183/18670	0.00407161	0.0298811	0.0185629	HSPA1B/BAG2/SIRT2	3
BP	GO:0006336	DNA replication-independent nucleosome assembly	2/33	54/18670	0.00409342	0.0298811	0.0185629	CENPM/CENPW	2
BP	GO:0034728	nucleosome organization	3/33	184/18670	0.00413414	0.0298811	0.0185629	HMGA1/CENPM/CENPW	3
BP	GO:0048639	positive regulation of developmental growth	3/33	184/18670	0.00413414	0.0298811	0.0185629	CCNB1/CDK1/VIL1	3
BP	GO:0009123	nucleoside monophosphate metabolic process	4/33	375/18670	0.00413655	0.0298811	0.0185629	CCNB1/CDK1/HSPA1B/UCK2	4
BP	GO:0034724	DNA replication-independent nucleosome organization	2/33	55/18670	0.00424321	0.0304513	0.0189171	CENPM/CENPW	2
BP	GO:0042176	regulation of protein catabolic process	4/33	381/18670	0.00437619	0.0307407	0.0190969	GPC3/HSPA1B/BAG2/SIRT2	4
BP	GO:0006977	DNA damage response, signal transduction by p53 class mediator resulting in cell cycle arrest	2/33	56/18670	0.00439552	0.0307407	0.0190969	CCNB1/CDK1	2
BP	GO:0034508	centromere complex assembly	2/33	56/18670	0.00439552	0.0307407	0.0190969	CENPM/CENPW	2
BP	GO:0070936	protein K48-linked ubiquitination	2/33	56/18670	0.00439552	0.0307407	0.0190969	UBE2C/UBE2T	2
BP	GO:0045981	positive regulation of nucleotide metabolic process	2/33	57/18670	0.00455034	0.0308412	0.0191593	CCNB1/CDK1	2
BP	GO:0060043	regulation of cardiac muscle cell proliferation	2/33	57/18670	0.00455034	0.0308412	0.0191593	CCNB1/CDK1	2
BP	GO:0072431	signal transduction involved in mitotic G1 DNA damage checkpoint	2/33	57/18670	0.00455034	0.0308412	0.0191593	CCNB1/CDK1	2
BP	GO:1900544	positive regulation of purine nucleotide metabolic process	2/33	57/18670	0.00455034	0.0308412	0.0191593	CCNB1/CDK1	2
BP	GO:1902400	intracellular signal transduction involved in G1 DNA damage checkpoint	2/33	57/18670	0.00455034	0.0308412	0.0191593	CCNB1/CDK1	2
BP	GO:0006333	chromatin assembly or disassembly	3/33	191/18670	0.00458833	0.0309079	0.0192008	HMGA1/CENPM/CENPW	3
BP	GO:0014706	striated muscle tissue development	4/33	390/18670	0.00475307	0.0318125	0.0197627	CCNB1/CDK1/SIRT2/CACYBP	4
BP	GO:0061077	chaperone-mediated protein folding	2/33	59/18670	0.00486748	0.0318125	0.0197627	HSPA1B/HSPB1	2
BP	GO:0072413	signal transduction involved in mitotic cell cycle checkpoint	2/33	59/18670	0.00486748	0.0318125	0.0197627	CCNB1/CDK1	2
BP	GO:1902402	signal transduction involved in mitotic DNA damage checkpoint	2/33	59/18670	0.00486748	0.0318125	0.0197627	CCNB1/CDK1	2
BP	GO:1902403	signal transduction involved in mitotic DNA integrity checkpoint	2/33	59/18670	0.00486748	0.0318125	0.0197627	CCNB1/CDK1	2
BP	GO:0043486	histone exchange	2/33	60/18670	0.00502979	0.0326787	0.0203008	CENPM/CENPW	2
BP	GO:0055025	positive regulation of cardiac muscle tissue development	2/33	62/18670	0.00536181	0.034631	0.0215136	CCNB1/CDK1	2
BP	GO:0031571	mitotic G1 DNA damage checkpoint	2/33	63/18670	0.00553151	0.0349057	0.0216843	CCNB1/CDK1	2
BP	GO:0044819	mitotic G1/S transition checkpoint	2/33	63/18670	0.00553151	0.0349057	0.0216843	CCNB1/CDK1	2
BP	GO:0046622	positive regulation of organ growth	2/33	63/18670	0.00553151	0.0349057	0.0216843	CCNB1/CDK1	2
BP	GO:0046686	response to cadmium ion	2/33	63/18670	0.00553151	0.0349057	0.0216843	CDK1/NUDT1	2
BP	GO:0060537	muscle tissue development	4/33	408/18670	0.00557155	0.0349575	0.0217165	CCNB1/CDK1/SIRT2/CACYBP	4
BP	GO:0044783	G1 DNA damage checkpoint	2/33	64/18670	0.00570366	0.0355831	0.0221051	CCNB1/CDK1	2
BP	GO:0060038	cardiac muscle cell proliferation	2/33	67/18670	0.00623474	0.0386765	0.0240268	CCNB1/CDK1	2
BP	GO:1903050	regulation of proteolysis involved in cellular protein catabolic process	3/33	214/18670	0.00628908	0.0387803	0.0240913	HSPA1B/BAG2/SIRT2	3
BP	GO:0009896	positive regulation of catabolic process	4/33	423/18670	0.00632211	0.0387803	0.0240913	GPC3/HSPA1B/BAG2/SIRT2	4
BP	GO:0072401	signal transduction involved in DNA integrity checkpoint	2/33	73/18670	0.00736187	0.0446593	0.0277435	CCNB1/CDK1	2
BP	GO:0072422	signal transduction involved in DNA damage checkpoint	2/33	73/18670	0.00736187	0.0446593	0.0277435	CCNB1/CDK1	2
BP	GO:0051054	positive regulation of DNA metabolic process	3/33	228/18670	0.00748618	0.0451639	0.0280569	CDK1/CACYBP/CDT1	3
BP	GO:0072395	signal transduction involved in cell cycle checkpoint	2/33	74/18670	0.00755805	0.0453483	0.0281715	CCNB1/CDK1	2
BP	GO:0007422	peripheral nervous system development	2/33	75/18670	0.00775658	0.0462866	0.0287544	CDK1/SIRT2	2
BP	GO:0048738	cardiac muscle tissue development	3/33	233/18670	0.00794425	0.0471502	0.0292909	CCNB1/CDK1/CACYBP	3
BP	GO:0031397	negative regulation of protein ubiquitination	2/33	77/18670	0.00816069	0.0481744	0.0299271	HSPA1B/BAG2	2
BP	GO:0007050	cell cycle arrest	3/33	237/18670	0.00832243	0.0488624	0.0303546	CCNB1/CDK1/CDKN3	3
BP	GO:0055021	regulation of cardiac muscle tissue growth	2/33	78/18670	0.00836624	0.0488624	0.0303546	CCNB1/CDK1	2
BP	GO:1900034	regulation of cellular response to heat	2/33	79/18670	0.00857411	0.0498115	0.0309442	HSPA1B/BAG2	2
BP	GO:0043254	regulation of protein complex assembly	4/33	467/18670	0.00890667	0.0514504	0.0319623	HSPA1B/VIL1/SIRT2/CDT1	4
BP	GO:0014855	striated muscle cell proliferation	2/33	81/18670	0.0089968	0.0514504	0.0319623	CCNB1/CDK1	2
BP	GO:0032436	positive regulation of proteasomal ubiquitin-dependent protein catabolic process	2/33	81/18670	0.0089968	0.0514504	0.0319623	HSPA1B/SIRT2	2
BP	GO:0034502	protein localization to chromosome	2/33	82/18670	0.00921159	0.0521357	0.032388	CDK1/CDT1	2
BP	GO:0071158	positive regulation of cell cycle arrest	2/33	82/18670	0.00921159	0.0521357	0.032388	CCNB1/CDK1	2
BP	GO:0000086	G2/M transition of mitotic cell cycle	3/33	247/18670	0.00931396	0.0521772	0.0324138	CCNB1/CDK1/CCNB2	3
BP	GO:1903362	regulation of cellular protein catabolic process	3/33	247/18670	0.00931396	0.0521772	0.0324138	HSPA1B/BAG2/SIRT2	3
BP	GO:0065004	protein-DNA complex assembly	3/33	248/18670	0.00941676	0.0522202	0.0324405	CENPM/CDT1/CENPW	3
BP	GO:1901991	negative regulation of mitotic cell cycle phase transition	3/33	248/18670	0.00941676	0.0522202	0.0324405	CCNB1/CDK1/CDT1	3
BP	GO:0060420	regulation of heart growth	2/33	84/18670	0.00964803	0.0532339	0.0330702	CCNB1/CDK1	2
BP	GO:0045844	positive regulation of striated muscle tissue development	2/33	87/18670	0.0103197	0.0560943	0.0348472	CCNB1/CDK1	2
BP	GO:0048477	oogenesis	2/33	87/18670	0.0103197	0.0560943	0.0348472	CCNB1/SIRT2	2
BP	GO:0048636	positive regulation of muscle organ development	2/33	87/18670	0.0103197	0.0560943	0.0348472	CCNB1/CDK1	2
BP	GO:0043044	ATP-dependent chromatin remodeling	2/33	88/18670	0.0105481	0.0562225	0.0349268	CENPM/CENPW	2
BP	GO:1901863	positive regulation of muscle tissue development	2/33	88/18670	0.0105481	0.0562225	0.0349268	CCNB1/CDK1	2
BP	GO:1902476	chloride transmembrane transport	2/33	88/18670	0.0105481	0.0562225	0.0349268	CLDN4/SLC26A6	2
BP	GO:1903321	negative regulation of protein modification by small protein conjugation or removal	2/33	88/18670	0.0105481	0.0562225	0.0349268	HSPA1B/BAG2	2
BP	GO:0055013	cardiac muscle cell development	2/33	89/18670	0.0107788	0.0571743	0.0355181	CCNB1/CDK1	2
BP	GO:0007281	germ cell development	3/33	262/18670	0.0109264	0.0574029	0.0356601	CCNB1/SIRT2/SLC26A6	3
BP	GO:0010466	negative regulation of peptidase activity	3/33	262/18670	0.0109264	0.0574029	0.0356601	GPC3/VIL1/PTTG1	3
BP	GO:0044839	cell cycle G2/M phase transition	3/33	266/18670	0.0113821	0.0595121	0.0369704	CCNB1/CDK1/CCNB2	3
BP	GO:1901988	negative regulation of cell cycle phase transition	3/33	267/18670	0.0114977	0.0598317	0.037169	CCNB1/CDK1/CDT1	3
BP	GO:0031334	positive regulation of protein complex assembly	3/33	268/18670	0.011614	0.0601518	0.0373678	HSPA1B/VIL1/CDT1	3
BP	GO:0045927	positive regulation of growth	3/33	270/18670	0.0118487	0.0610791	0.0379439	CCNB1/CDK1/VIL1	3
BP	GO:0055006	cardiac cell development	2/33	95/18670	0.0122092	0.0623522	0.0387347	CCNB1/CDK1	2
BP	GO:2000060	positive regulation of ubiquitin-dependent protein catabolic process	2/33	95/18670	0.0122092	0.0623522	0.0387347	HSPA1B/SIRT2	2
BP	GO:1990823	response to leukemia inhibitory factor	2/33	96/18670	0.0124553	0.0630227	0.0391513	MYBL2/CACYBP	2
BP	GO:1990830	cellular response to leukemia inhibitory factor	2/33	96/18670	0.0124553	0.0630227	0.0391513	MYBL2/CACYBP	2
BP	GO:0042775	mitochondrial ATP synthesis coupled electron transport	2/33	97/18670	0.0127036	0.0636919	0.039567	CCNB1/CDK1	2
BP	GO:0044773	mitotic DNA damage checkpoint	2/33	97/18670	0.0127036	0.0636919	0.039567	CCNB1/CDK1	2
BP	GO:0042773	ATP synthesis coupled electron transport	2/33	98/18670	0.012954	0.0646523	0.0401636	CCNB1/CDK1	2
BP	GO:0022600	digestive system process	2/33	100/18670	0.0134614	0.0665792	0.0413607	VIL1/SLC26A6	2
BP	GO:0055024	regulation of cardiac muscle tissue development	2/33	100/18670	0.0134614	0.0665792	0.0413607	CCNB1/CDK1	2
BP	GO:0021700	developmental maturation	3/33	284/18670	0.0135683	0.0668071	0.0415023	CCNB1/SIRT2/SLC26A6	3
BP	GO:0051146	striated muscle cell differentiation	3/33	293/18670	0.0147455	0.0720635	0.0447677	CCNB1/CDK1/CACYBP	3
BP	GO:0055017	cardiac muscle tissue growth	2/33	105/18670	0.0147671	0.0720635	0.0447677	CCNB1/CDK1	2
BP	GO:0044774	mitotic DNA integrity checkpoint	2/33	106/18670	0.0150346	0.0730442	0.0453769	CCNB1/CDK1	2
BP	GO:0030330	DNA damage response, signal transduction by p53 class mediator	2/33	107/18670	0.0153042	0.0740265	0.0459871	CCNB1/CDK1	2
BP	GO:0006821	chloride transport	2/33	108/18670	0.0155759	0.0746826	0.0463947	CLDN4/SLC26A6	2
BP	GO:0071156	regulation of cell cycle arrest	2/33	108/18670	0.0155759	0.0746826	0.0463947	CCNB1/CDK1	2
BP	GO:0032508	DNA duplex unwinding	2/33	110/18670	0.0161255	0.0769816	0.0478229	HMGA1/GINS2	2
BP	GO:0046034	ATP metabolic process	3/33	305/18670	0.0164031	0.0776332	0.0482277	CCNB1/CDK1/HSPA1B	3
BP	GO:0098661	inorganic anion transmembrane transport	2/33	111/18670	0.0164034	0.0776332	0.0482277	CLDN4/SLC26A6	2
BP	GO:0060419	heart growth	2/33	112/18670	0.0166833	0.0776555	0.0482416	CCNB1/CDK1	2
BP	GO:0046620	regulation of organ growth	2/33	113/18670	0.0169653	0.0776555	0.0482416	CCNB1/CDK1	2
BP	GO:0042035	regulation of cytokine biosynthetic process	2/33	114/18670	0.0172494	0.0776555	0.0482416	HSPB1/IGF2BP2	2
BP	GO:0006222	UMP biosynthetic process	1/33	10/18670	0.0175397	0.0776555	0.0482416	UCK2	1
BP	GO:0009173	pyrimidine ribonucleoside monophosphate metabolic process	1/33	10/18670	0.0175397	0.0776555	0.0482416	UCK2	1
BP	GO:0009174	pyrimidine ribonucleoside monophosphate biosynthetic process	1/33	10/18670	0.0175397	0.0776555	0.0482416	UCK2	1
BP	GO:0035672	oligopeptide transmembrane transport	1/33	10/18670	0.0175397	0.0776555	0.0482416	SLC26A6	1
BP	GO:0042891	antibiotic transport	1/33	10/18670	0.0175397	0.0776555	0.0482416	SLC26A6	1
BP	GO:0046049	UMP metabolic process	1/33	10/18670	0.0175397	0.0776555	0.0482416	UCK2	1
BP	GO:0051014	actin filament severing	1/33	10/18670	0.0175397	0.0776555	0.0482416	VIL1	1
BP	GO:0060281	regulation of oocyte development	1/33	10/18670	0.0175397	0.0776555	0.0482416	SIRT2	1
BP	GO:0071281	cellular response to iron ion	1/33	10/18670	0.0175397	0.0776555	0.0482416	CCNB1	1
BP	GO:0072203	cell proliferation involved in metanephros development	1/33	10/18670	0.0175397	0.0776555	0.0482416	GPC3	1
BP	GO:1902101	positive regulation of metaphase/anaphase transition of cell cycle	1/33	10/18670	0.0175397	0.0776555	0.0482416	CDT1	1
BP	GO:1903265	positive regulation of tumor necrosis factor-mediated signaling pathway	1/33	10/18670	0.0175397	0.0776555	0.0482416	HSPA1B	1
BP	GO:1905879	regulation of oogenesis	1/33	10/18670	0.0175397	0.0776555	0.0482416	SIRT2	1
BP	GO:0007569	cell aging	2/33	116/18670	0.0178236	0.0778865	0.0483851	CDK1/HMGA1	2
BP	GO:0022904	respiratory electron transport chain	2/33	117/18670	0.0181137	0.0778865	0.0483851	CCNB1/CDK1	2
BP	GO:0031398	positive regulation of protein ubiquitination	2/33	117/18670	0.0181137	0.0778865	0.0483851	UBE2C/UBE2S	2
BP	GO:0032392	DNA geometric change	2/33	119/18670	0.0187	0.0778865	0.0483851	HMGA1/GINS2	2
BP	GO:0006342	chromatin silencing	2/33	120/18670	0.0189962	0.0778865	0.0483851	HMGA1/SIRT2	2
BP	GO:1903311	regulation of mRNA metabolic process	3/33	324/18670	0.0192351	0.0778865	0.0483851	CCNB1/HSPB1/IGF2BP2	3
BP	GO:1903829	positive regulation of cellular protein localization	3/33	324/18670	0.0192351	0.0778865	0.0483851	CDK1/VIL1/CDT1	3
BP	GO:0000727	double-strand break repair via break-induced replication	1/33	11/18670	0.0192772	0.0778865	0.0483851	GINS2	1
BP	GO:0006857	oligopeptide transport	1/33	11/18670	0.0192772	0.0778865	0.0483851	SLC26A6	1
BP	GO:0008655	pyrimidine-containing compound salvage	1/33	11/18670	0.0192772	0.0778865	0.0483851	UCK2	1
BP	GO:0009151	purine deoxyribonucleotide metabolic process	1/33	11/18670	0.0192772	0.0778865	0.0483851	NUDT1	1
BP	GO:0015791	polyol transport	1/33	11/18670	0.0192772	0.0778865	0.0483851	SLC26A6	1
BP	GO:0019042	viral latency	1/33	11/18670	0.0192772	0.0778865	0.0483851	HMGA1	1
BP	GO:0019532	oxalate transport	1/33	11/18670	0.0192772	0.0778865	0.0483851	SLC26A6	1
BP	GO:0031442	positive regulation of mRNA 3'-end processing	1/33	11/18670	0.0192772	0.0778865	0.0483851	CCNB1	1
BP	GO:0035404	histone-serine phosphorylation	1/33	11/18670	0.0192772	0.0778865	0.0483851	CCNB1	1
BP	GO:0043097	pyrimidine nucleoside salvage	1/33	11/18670	0.0192772	0.0778865	0.0483851	UCK2	1
BP	GO:0070933	histone H4 deacetylation	1/33	11/18670	0.0192772	0.0778865	0.0483851	SIRT2	1
BP	GO:0090042	tubulin deacetylation	1/33	11/18670	0.0192772	0.0778865	0.0483851	SIRT2	1
BP	GO:0090084	negative regulation of inclusion body assembly	1/33	11/18670	0.0192772	0.0778865	0.0483851	HSPA1B	1
BP	GO:1905383	protein localization to presynapse	1/33	11/18670	0.0192772	0.0778865	0.0483851	HSPB1	1
BP	GO:1905820	positive regulation of chromosome separation	1/33	11/18670	0.0192772	0.0778865	0.0483851	CDT1	1
BP	GO:2000392	regulation of lamellipodium morphogenesis	1/33	11/18670	0.0192772	0.0778865	0.0483851	VIL1	1
BP	GO:0046718	viral entry into host cell	2/33	121/18670	0.0192943	0.0778865	0.0483851	CDK1/HSPA1B	2
BP	GO:0032434	regulation of proteasomal ubiquitin-dependent protein catabolic process	2/33	122/18670	0.0195944	0.0785207	0.048779	HSPA1B/SIRT2	2
BP	GO:1903578	regulation of ATP metabolic process	2/33	122/18670	0.0195944	0.0785207	0.048779	CCNB1/CDK1	2
BP	GO:0042089	cytokine biosynthetic process	2/33	123/18670	0.0198965	0.0794413	0.0493509	HSPB1/IGF2BP2	2
BP	GO:0014013	regulation of gliogenesis	2/33	124/18670	0.0202006	0.079785	0.0495644	CDK1/SIRT2	2
BP	GO:0042107	cytokine metabolic process	2/33	124/18670	0.0202006	0.079785	0.0495644	HSPB1/IGF2BP2	2
BP	GO:0051101	regulation of DNA binding	2/33	124/18670	0.0202006	0.079785	0.0495644	SIRT2/CDT1	2
BP	GO:2000134	negative regulation of G1/S transition of mitotic cell cycle	2/33	125/18670	0.0205066	0.0806671	0.0501124	CCNB1/CDK1	2
BP	GO:0018107	peptidyl-threonine phosphorylation	2/33	126/18670	0.0208146	0.0806671	0.0501124	CDK1/SIRT2	2
BP	GO:0009205	purine ribonucleoside triphosphate metabolic process	3/33	335/18670	0.0209916	0.0806671	0.0501124	CCNB1/CDK1/HSPA1B	3
BP	GO:0031507	heterochromatin assembly	1/33	12/18670	0.0210116	0.0806671	0.0501124	HMGA1	1
BP	GO:0072178	nephric duct morphogenesis	1/33	12/18670	0.0210116	0.0806671	0.0501124	GPC3	1
BP	GO:0097201	negative regulation of transcription from RNA polymerase II promoter in response to stress	1/33	12/18670	0.0210116	0.0806671	0.0501124	SIRT2	1
BP	GO:0099640	axo-dendritic protein transport	1/33	12/18670	0.0210116	0.0806671	0.0501124	HSPB1	1
BP	GO:2000105	positive regulation of DNA-dependent DNA replication	1/33	12/18670	0.0210116	0.0806671	0.0501124	CDT1	1
BP	GO:0009167	purine ribonucleoside monophosphate metabolic process	3/33	340/18670	0.0218185	0.083473	0.0518555	CCNB1/CDK1/HSPA1B	3
BP	GO:0009126	purine nucleoside monophosphate metabolic process	3/33	341/18670	0.021986	0.0835042	0.0518749	CCNB1/CDK1/HSPA1B	3
BP	GO:1902807	negative regulation of cell cycle G1/S phase transition	2/33	131/18670	0.0223834	0.0835042	0.0518749	CCNB1/CDK1	2
BP	GO:0009143	nucleoside triphosphate catabolic process	1/33	13/18670	0.0227432	0.0835042	0.0518749	NUDT1	1
BP	GO:0032530	regulation of microvillus organization	1/33	13/18670	0.0227432	0.0835042	0.0518749	VIL1	1
BP	GO:0032536	regulation of cell projection size	1/33	13/18670	0.0227432	0.0835042	0.0518749	VIL1	1
BP	GO:0033127	regulation of histone phosphorylation	1/33	13/18670	0.0227432	0.0835042	0.0518749	CCNB1	1
BP	GO:0035563	positive regulation of chromatin binding	1/33	13/18670	0.0227432	0.0835042	0.0518749	CDT1	1
BP	GO:0051315	attachment of mitotic spindle microtubules to kinetochore	1/33	13/18670	0.0227432	0.0835042	0.0518749	CDT1	1
BP	GO:0070431	nucleotide-binding oligomerization domain containing 2 signaling pathway	1/33	13/18670	0.0227432	0.0835042	0.0518749	HSPA1B	1
BP	GO:0071872	cellular response to epinephrine stimulus	1/33	13/18670	0.0227432	0.0835042	0.0518749	SIRT2	1
BP	GO:1900225	regulation of NLRP3 inflammasome complex assembly	1/33	13/18670	0.0227432	0.0835042	0.0518749	SIRT2	1
BP	GO:2000052	positive regulation of non-canonical Wnt signaling pathway	1/33	13/18670	0.0227432	0.0835042	0.0518749	GPC3	1
BP	GO:0048638	regulation of developmental growth	3/33	347/18670	0.0230061	0.0835042	0.0518749	CCNB1/CDK1/VIL1	3
BP	GO:0042770	signal transduction in response to DNA damage	2/33	133/18670	0.0230244	0.0835042	0.0518749	CCNB1/CDK1	2
BP	GO:0018210	peptidyl-threonine modification	2/33	134/18670	0.0233477	0.0835042	0.0518749	CDK1/SIRT2	2
BP	GO:0030260	entry into host cell	2/33	134/18670	0.0233477	0.0835042	0.0518749	CDK1/HSPA1B	2
BP	GO:0032273	positive regulation of protein polymerization	2/33	134/18670	0.0233477	0.0835042	0.0518749	HSPA1B/VIL1	2
BP	GO:0044409	entry into host	2/33	134/18670	0.0233477	0.0835042	0.0518749	CDK1/HSPA1B	2
BP	GO:0051806	entry into cell of other organism involved in symbiotic interaction	2/33	134/18670	0.0233477	0.0835042	0.0518749	CDK1/HSPA1B	2
BP	GO:0051828	entry into other organism involved in symbiotic interaction	2/33	134/18670	0.0233477	0.0835042	0.0518749	CDK1/HSPA1B	2
BP	GO:1903322	positive regulation of protein modification by small protein conjugation or removal	2/33	135/18670	0.0236729	0.0837069	0.0520009	UBE2C/UBE2S	2
BP	GO:0007292	female gamete generation	2/33	136/18670	0.024	0.0837069	0.0520009	CCNB1/SIRT2	2
BP	GO:0045814	negative regulation of gene expression, epigenetic	2/33	136/18670	0.024	0.0837069	0.0520009	HMGA1/SIRT2	2
BP	GO:0034605	cellular response to heat	2/33	137/18670	0.024329	0.0837069	0.0520009	HSPA1B/BAG2	2
BP	GO:0006241	CTP biosynthetic process	1/33	14/18670	0.0244717	0.0837069	0.0520009	UCK2	1
BP	GO:0006268	DNA unwinding involved in DNA replication	1/33	14/18670	0.0244717	0.0837069	0.0520009	HMGA1	1
BP	GO:0030836	positive regulation of actin filament depolymerization	1/33	14/18670	0.0244717	0.0837069	0.0520009	VIL1	1
BP	GO:0043173	nucleotide salvage	1/33	14/18670	0.0244717	0.0837069	0.0520009	UCK2	1
BP	GO:0044546	NLRP3 inflammasome complex assembly	1/33	14/18670	0.0244717	0.0837069	0.0520009	SIRT2	1
BP	GO:0045836	positive regulation of meiotic nuclear division	1/33	14/18670	0.0244717	0.0837069	0.0520009	SIRT2	1
BP	GO:0046036	CTP metabolic process	1/33	14/18670	0.0244717	0.0837069	0.0520009	UCK2	1
BP	GO:0048308	organelle inheritance	1/33	14/18670	0.0244717	0.0837069	0.0520009	CDK1	1
BP	GO:0048313	Golgi inheritance	1/33	14/18670	0.0244717	0.0837069	0.0520009	CDK1	1
BP	GO:0051775	response to redox state	1/33	14/18670	0.0244717	0.0837069	0.0520009	SIRT2	1
BP	GO:0022412	cellular process involved in reproduction in multicellular organism	3/33	357/18670	0.0247632	0.084441	0.0524569	CCNB1/SIRT2/SLC26A6	3
BP	GO:0007586	digestion	2/33	139/18670	0.0249925	0.0846968	0.0526158	VIL1/SLC26A6	2
BP	GO:0031333	negative regulation of protein complex assembly	2/33	139/18670	0.0249925	0.0846968	0.0526158	VIL1/SIRT2	2
BP	GO:0031331	positive regulation of cellular catabolic process	3/33	361/18670	0.025486	0.085609	0.0531825	HSPA1B/BAG2/SIRT2	3
BP	GO:0045861	negative regulation of proteolysis	3/33	363/18670	0.0258517	0.085609	0.0531825	GPC3/VIL1/PTTG1	3
BP	GO:0045862	positive regulation of proteolysis	3/33	363/18670	0.0258517	0.085609	0.0531825	HSPA1B/BAG2/SIRT2	3
BP	GO:1900542	regulation of purine nucleotide metabolic process	2/33	142/18670	0.0260016	0.085609	0.0531825	CCNB1/CDK1	2
BP	GO:0006402	mRNA catabolic process	3/33	364/18670	0.0260356	0.085609	0.0531825	HSPA1B/HSPB1/IGF2BP2	3
BP	GO:0009209	pyrimidine ribonucleoside triphosphate biosynthetic process	1/33	15/18670	0.0261973	0.085609	0.0531825	UCK2	1
BP	GO:0042074	cell migration involved in gastrulation	1/33	15/18670	0.0261973	0.085609	0.0531825	GPC3	1
BP	GO:0098840	protein transport along microtubule	1/33	15/18670	0.0261973	0.085609	0.0531825	HSPB1	1
BP	GO:0099118	microtubule-based protein transport	1/33	15/18670	0.0261973	0.085609	0.0531825	HSPB1	1
BP	GO:1900119	positive regulation of execution phase of apoptosis	1/33	15/18670	0.0261973	0.085609	0.0531825	SIRT2	1
BP	GO:2000095	regulation of Wnt signaling pathway, planar cell polarity pathway	1/33	15/18670	0.0261973	0.085609	0.0531825	GPC3	1
BP	GO:2001028	positive regulation of endothelial cell chemotaxis	1/33	15/18670	0.0261973	0.085609	0.0531825	HSPB1	1
BP	GO:0000077	DNA damage checkpoint	2/33	145/18670	0.0270272	0.0868443	0.0539499	CCNB1/CDK1	2
BP	GO:0006119	oxidative phosphorylation	2/33	145/18670	0.0270272	0.0868443	0.0539499	CCNB1/CDK1	2
BP	GO:0006334	nucleosome assembly	2/33	145/18670	0.0270272	0.0868443	0.0539499	CENPM/CENPW	2
BP	GO:0006140	regulation of nucleotide metabolic process	2/33	146/18670	0.0273727	0.0868443	0.0539499	CCNB1/CDK1	2
BP	GO:0051098	regulation of binding	3/33	373/18670	0.027723	0.0868443	0.0539499	BAG2/SIRT2/CDT1	3
BP	GO:0000076	DNA replication checkpoint	1/33	16/18670	0.0279199	0.0868443	0.0539499	CDT1	1
BP	GO:0009130	pyrimidine nucleoside monophosphate biosynthetic process	1/33	16/18670	0.0279199	0.0868443	0.0539499	UCK2	1
BP	GO:0009208	pyrimidine ribonucleoside triphosphate metabolic process	1/33	16/18670	0.0279199	0.0868443	0.0539499	UCK2	1
BP	GO:0043174	nucleoside salvage	1/33	16/18670	0.0279199	0.0868443	0.0539499	UCK2	1
BP	GO:0048012	hepatocyte growth factor receptor signaling pathway	1/33	16/18670	0.0279199	0.0868443	0.0539499	SIRT2	1
BP	GO:0051382	kinetochore assembly	1/33	16/18670	0.0279199	0.0868443	0.0539499	CENPW	1
BP	GO:0051444	negative regulation of ubiquitin-protein transferase activity	1/33	16/18670	0.0279199	0.0868443	0.0539499	BAG2	1
BP	GO:0070293	renal absorption	1/33	16/18670	0.0279199	0.0868443	0.0539499	CLDN4	1
BP	GO:0071871	response to epinephrine	1/33	16/18670	0.0279199	0.0868443	0.0539499	SIRT2	1
BP	GO:0072176	nephric duct development	1/33	16/18670	0.0279199	0.0868443	0.0539499	GPC3	1
BP	GO:0090083	regulation of inclusion body assembly	1/33	16/18670	0.0279199	0.0868443	0.0539499	HSPA1B	1
BP	GO:1902358	sulfate transmembrane transport	1/33	16/18670	0.0279199	0.0868443	0.0539499	SLC26A6	1
BP	GO:2000058	regulation of ubiquitin-dependent protein catabolic process	2/33	149/18670	0.0284199	0.0881499	0.0547609	HSPA1B/SIRT2	2
BP	GO:0008272	sulfate transport	1/33	17/18670	0.0296396	0.0904007	0.0561592	SLC26A6	1
BP	GO:0009129	pyrimidine nucleoside monophosphate metabolic process	1/33	17/18670	0.0296396	0.0904007	0.0561592	UCK2	1
BP	GO:0017085	response to insecticide	1/33	17/18670	0.0296396	0.0904007	0.0561592	CCNB1	1
BP	GO:0033262	regulation of nuclear cell cycle DNA replication	1/33	17/18670	0.0296396	0.0904007	0.0561592	CDT1	1
BP	GO:0062033	positive regulation of mitotic sister chromatid segregation	1/33	17/18670	0.0296396	0.0904007	0.0561592	CDT1	1
BP	GO:0072673	lamellipodium morphogenesis	1/33	17/18670	0.0296396	0.0904007	0.0561592	VIL1	1
BP	GO:0062013	positive regulation of small molecule metabolic process	2/33	153/18670	0.0298411	0.0907632	0.0563844	CCNB1/CDK1	2
BP	GO:0042692	muscle cell differentiation	3/33	385/18670	0.0300624	0.0911838	0.0566457	CCNB1/CDK1/CACYBP	3
BP	GO:0009200	deoxyribonucleoside triphosphate metabolic process	1/33	18/18670	0.0313563	0.0945857	0.058759	NUDT1	1
BP	GO:0070633	transepithelial transport	1/33	18/18670	0.0313563	0.0945857	0.058759	SLC26A6	1
BP	GO:0043467	regulation of generation of precursor metabolites and energy	2/33	158/18670	0.0316569	0.095231	0.0591599	CCNB1/CDK1	2
BP	GO:0006401	RNA catabolic process	3/33	397/18670	0.0325042	0.0975126	0.0605773	HSPA1B/HSPB1/IGF2BP2	3
BP	GO:0006337	nucleosome disassembly	1/33	19/18670	0.0330701	0.0984036	0.0611308	HMGA1	1
BP	GO:0009148	pyrimidine nucleoside triphosphate biosynthetic process	1/33	19/18670	0.0330701	0.0984036	0.0611308	UCK2	1
BP	GO:1902176	negative regulation of oxidative stress-induced intrinsic apoptotic signaling pathway	1/33	19/18670	0.0330701	0.0984036	0.0611308	HSPB1	1
BP	GO:0071695	anatomical structure maturation	2/33	165/18670	0.0342711	0.0999723	0.0621053	CCNB1/SIRT2	2
BP	GO:0006271	DNA strand elongation involved in DNA replication	1/33	20/18670	0.0347809	0.0999723	0.0621053	GINS2	1
BP	GO:0007095	mitotic G2 DNA damage checkpoint	1/33	20/18670	0.0347809	0.0999723	0.0621053	CDK1	1
BP	GO:0009264	deoxyribonucleotide catabolic process	1/33	20/18670	0.0347809	0.0999723	0.0621053	NUDT1	1
BP	GO:0031936	negative regulation of chromatin silencing	1/33	20/18670	0.0347809	0.0999723	0.0621053	HMGA1	1
BP	GO:0042535	positive regulation of tumor necrosis factor biosynthetic process	1/33	20/18670	0.0347809	0.0999723	0.0621053	HSPB1	1
BP	GO:0051016	barbed-end actin filament capping	1/33	20/18670	0.0347809	0.0999723	0.0621053	VIL1	1
BP	GO:0070828	heterochromatin organization	1/33	20/18670	0.0347809	0.0999723	0.0621053	HMGA1	1
BP	GO:0070932	histone H3 deacetylation	1/33	20/18670	0.0347809	0.0999723	0.0621053	SIRT2	1
BP	GO:1900424	regulation of defense response to bacterium	1/33	20/18670	0.0347809	0.0999723	0.0621053	SIRT2	1
BP	GO:1901673	regulation of mitotic spindle assembly	1/33	20/18670	0.0347809	0.0999723	0.0621053	HSPA1B	1
BP	GO:1901881	positive regulation of protein depolymerization	1/33	20/18670	0.0347809	0.0999723	0.0621053	VIL1	1
BP	GO:2000774	positive regulation of cellular senescence	1/33	20/18670	0.0347809	0.0999723	0.0621053	HMGA1	1
CC	GO:0005819	spindle	7/34	347/19717	1.75923e-06	0.000262126	0.000187034	CCNB1/CDK1/HSPB1/KIFC1/MAD2L1BP/TACC3/SIRT2	7
CC	GO:0005680	anaphase-promoting complex	3/34	21/19717	6.09981e-06	0.000454436	0.000324253	UBE2C/UBE2S/CDC26	3
CC	GO:0098687	chromosomal region	6/34	349/19717	2.60685e-05	0.00102719	0.000732926	CCNB1/CDK1/SIRT2/CENPM/CDT1/CENPW	6
CC	GO:0000777	condensed chromosome kinetochore	4/34	105/19717	3.11395e-05	0.00102719	0.000732926	CCNB1/CENPM/CDT1/CENPW	4
CC	GO:0072686	mitotic spindle	4/34	109/19717	3.60643e-05	0.00102719	0.000732926	CDK1/KIFC1/TACC3/SIRT2	4
CC	GO:0000779	condensed chromosome, centromeric region	4/34	118/19717	4.92044e-05	0.00102719	0.000732926	CCNB1/CENPM/CDT1/CENPW	4
CC	GO:0000307	cyclin-dependent protein kinase holoenzyme complex	3/34	42/19717	5.13636e-05	0.00102719	0.000732926	CCNB1/CDK1/CCNB2	3
CC	GO:0000152	nuclear ubiquitin ligase complex	3/34	43/19717	5.51509e-05	0.00102719	0.000732926	UBE2C/UBE2S/CDC26	3
CC	GO:0000776	kinetochore	4/34	135/19717	8.31116e-05	0.00137596	0.000981786	CCNB1/CENPM/CDT1/CENPW	4
CC	GO:0031461	cullin-RING ubiquitin ligase complex	4/34	158/19717	0.000152637	0.00227429	0.00162277	UBE2C/CACYBP/UBE2S/CDC26	4
CC	GO:0000775	chromosome, centromeric region	4/34	193/19717	0.00032795	0.00444223	0.00316966	CCNB1/CENPM/CDT1/CENPW	4
CC	GO:1902554	serine/threonine protein kinase complex	3/34	88/19717	0.000465099	0.00577497	0.00412061	CCNB1/CDK1/CCNB2	3
CC	GO:0000793	condensed chromosome	4/34	223/19717	0.000565975	0.00648694	0.00462862	CCNB1/CENPM/CDT1/CENPW	4
CC	GO:1902911	protein kinase complex	3/34	109/19717	0.000868075	0.00923879	0.00659214	CCNB1/CDK1/CCNB2	3
CC	GO:0000151	ubiquitin ligase complex	4/34	282/19717	0.00135492	0.0134589	0.0096033	UBE2C/CACYBP/UBE2S/CDC26	4
CC	GO:0034707	chloride channel complex	2/34	50/19717	0.003357	0.0312621	0.0223064	CLDN4/SLC26A6	2
CC	GO:0005874	microtubule	4/34	416/19717	0.00549154	0.0481317	0.0343434	CDK1/KIFC1/BAG2/SIRT2	4
CC	GO:0000792	heterochromatin	2/34	78/19717	0.0079852	0.0629838	0.0449408	HMGA1/SIRT2	2
CC	GO:0005635	nuclear envelope	4/34	464/19717	0.0080315	0.0629838	0.0449408	GNAZ/NUDT1/MAD2L1BP/CACYBP	4
CC	GO:0061695	transferase complex, transferring phosphorus-containing groups	3/34	259/19717	0.00992832	0.073966	0.0527769	CCNB1/CDK1/CCNB2	3
CC	GO:0005903	brush border	2/34	99/19717	0.0126117	0.0894827	0.0638485	VIL1/SLC26A6	2
MF	GO:0044389	ubiquitin-like protein ligase binding	6/32	308/17697	1.63808e-05	0.00224417	0.00151738	CCNB1/HSPA1B/BAG2/UBE2C/CACYBP/UBE2T	6
MF	GO:0061631	ubiquitin conjugating enzyme activity	3/32	38/17697	4.3397e-05	0.00231533	0.00156549	UBE2C/UBE2S/UBE2T	3
MF	GO:0061650	ubiquitin-like protein conjugating enzyme activity	3/32	40/17697	5.07006e-05	0.00231533	0.00156549	UBE2C/UBE2S/UBE2T	3
MF	GO:0035173	histone kinase activity	2/32	17/17697	0.000423559	0.0145069	0.00980873	CCNB1/CDK1	2
MF	GO:0044183	protein binding involved in protein folding	2/32	23/17697	0.000782625	0.0214439	0.0144992	HSPA1B/HSPB1	2
MF	GO:0031072	heat shock protein binding	3/32	119/17697	0.00127539	0.0291214	0.0196902	CDK1/HSPA1B/BAG2	3
MF	GO:0031625	ubiquitin protein ligase binding	4/32	290/17697	0.00176915	0.0346248	0.0234113	HSPA1B/BAG2/CACYBP/UBE2T	4
MF	GO:0016538	cyclin-dependent protein serine/threonine kinase regulator activity	2/32	49/17697	0.00353276	0.0555981	0.0375922	CCNB1/CCNB2	2
MF	GO:0019887	protein kinase regulator activity	3/32	180/17697	0.00413216	0.0555981	0.0375922	CCNB1/HSPB1/CCNB2	3
MF	GO:0030414	peptidase inhibitor activity	3/32	182/17697	0.00426181	0.0555981	0.0375922	GPC3/VIL1/PTTG1	3
MF	GO:0004857	enzyme inhibitor activity	4/32	375/17697	0.00446408	0.0555981	0.0375922	GPC3/HSPB1/VIL1/PTTG1	4
MF	GO:0004869	cysteine-type endopeptidase inhibitor activity	2/32	58/17697	0.00491566	0.0561204	0.0379454	VIL1/PTTG1	2
MF	GO:0019207	kinase regulator activity	3/32	207/17697	0.00609413	0.0632148	0.0427422	CCNB1/HSPB1/CCNB2	3
MF	GO:0061134	peptidase regulator activity	3/32	219/17697	0.00711746	0.0632148	0.0427422	GPC3/VIL1/PTTG1	3
MF	GO:0001618	virus receptor activity	2/32	74/17697	0.00788906	0.0632148	0.0427422	CDK1/HSPA1B	2
MF	GO:0104005	hijacked molecular function	2/32	74/17697	0.00788906	0.0632148	0.0427422	CDK1/HSPA1B	2
MF	GO:0005254	chloride channel activity	2/32	75/17697	0.0080961	0.0632148	0.0427422	CLDN4/SLC26A6	2
MF	GO:0043130	ubiquitin binding	2/32	76/17697	0.00830559	0.0632148	0.0427422	HSPB1/SIRT2	2
MF	GO:0005253	anion channel activity	2/32	89/17697	0.011247	0.0810965	0.0548328	CLDN4/SLC26A6	2
MF	GO:0032182	ubiquitin-like protein binding	2/32	96/17697	0.0129942	0.0890105	0.0601838	HSPB1/SIRT2	2
MF	GO:0015108	chloride transmembrane transporter activity	2/32	100/17697	0.0140425	0.0916108	0.061942	CLDN4/SLC26A6	2
KEGG	hsa04110	Cell cycle	5/21	124/8076	1.31526e-05	0.000310929	0.000251764	CCNB1/CDK1/CCNB2/PTTG1/CDC26	5
KEGG	hsa04114	Oocyte meiosis	5/21	129/8076	1.59451e-05	0.000310929	0.000251764	CCNB1/CDK1/CCNB2/PTTG1/CDC26	5
KEGG	hsa04914	Progesterone-mediated oocyte maturation	4/21	100/8076	0.000112674	0.00146477	0.00118605	CCNB1/CDK1/CCNB2/CDC26	4
KEGG	hsa04218	Cellular senescence	4/21	156/8076	0.000620436	0.00604925	0.00489818	CCNB1/CDK1/MYBL2/CCNB2	4
KEGG	hsa04115	p53 signaling pathway	3/21	73/8076	0.000838462	0.00654	0.00529555	CCNB1/CDK1/CCNB2	3
KEGG	hsa05170	Human immunodeficiency virus 1 infection	4/21	212/8076	0.00194441	0.0126387	0.0102337	CCNB1/CDK1/CCNB2/AP1M2	4
KEGG	hsa04120	Ubiquitin mediated proteolysis	3/21	140/8076	0.00539481	0.0300568	0.0243375	UBE2C/UBE2S/CDC26	3
KEGG	hsa05166	Human T-cell leukemia virus 1 infection	3/21	219/8076	0.0182429	0.088934	0.0720113	CCNB2/PTTG1/CDC26	3

## Sheet: darkorange enrich
Enrichment result of signature genes in darkorange module
ONTOLOGY	ID	Description	GeneRatio	BgRatio	pvalue	p.adjust	qvalue	geneID	Count
BP	GO:0031331	positive regulation of cellular catabolic process	5/11	361/18670	1.10383e-06	0.000658988	0.000297454	FOXO1/IRS1/LDLR/TOB1/APOA5	5
BP	GO:0009896	positive regulation of catabolic process	5/11	423/18670	2.40727e-06	0.000718569	0.000324347	FOXO1/IRS1/LDLR/TOB1/APOA5	5
BP	GO:0050994	regulation of lipid catabolic process	3/11	54/18670	3.71253e-06	0.000738793	0.000333476	IRS1/LDLR/APOA5	3
BP	GO:0030258	lipid modification	4/11	238/18670	7.92089e-06	0.00118219	0.000533618	CYP2C8/IRS1/SOCS2/APOA5	4
BP	GO:1903725	regulation of phospholipid metabolic process	3/11	88/18670	1.62459e-05	0.00193976	0.000875567	IRS1/LDLR/SOCS2	3
BP	GO:0015748	organophosphate ester transport	3/11	105/18670	2.7601e-05	0.0027463	0.00123962	LDLR/SLC25A25/APOA5	3
BP	GO:0030299	intestinal cholesterol absorption	2/11	15/18670	3.29991e-05	0.00281435	0.00127034	LDLR/APOA5	2
BP	GO:0098856	intestinal lipid absorption	2/11	17/18670	4.27142e-05	0.00318755	0.00143879	LDLR/APOA5	2
BP	GO:0044241	lipid digestion	2/11	19/18670	5.36723e-05	0.00322715	0.00145667	LDLR/APOA5	2
BP	GO:0090208	positive regulation of triglyceride metabolic process	2/11	21/18670	6.5871e-05	0.00322715	0.00145667	LDLR/APOA5	2
BP	GO:0008286	insulin receptor signaling pathway	3/11	141/18670	6.65561e-05	0.00322715	0.00145667	FOXO1/IRS1/SOCS2	3
BP	GO:0019216	regulation of lipid metabolic process	4/11	410/18670	6.69247e-05	0.00322715	0.00145667	IRS1/LDLR/SOCS2/APOA5	4
BP	GO:0045834	positive regulation of lipid metabolic process	3/11	146/18670	7.38259e-05	0.00322715	0.00145667	IRS1/LDLR/APOA5	3
BP	GO:0006644	phospholipid metabolic process	4/11	430/18670	8.05343e-05	0.00322715	0.00145667	IRS1/LDLR/SOCS2/APOA5	4
BP	GO:0062013	positive regulation of small molecule metabolic process	3/11	153/18670	8.48511e-05	0.00322715	0.00145667	FOXO1/IRS1/APOA5	3
BP	GO:0050996	positive regulation of lipid catabolic process	2/11	24/18670	8.64898e-05	0.00322715	0.00145667	IRS1/APOA5	2
BP	GO:0062012	regulation of small molecule metabolic process	4/11	459/18670	0.000103731	0.0036428	0.00164429	FOXO1/IRS1/LDLR/APOA5	4
BP	GO:0015711	organic anion transport	4/11	482/18670	0.000125336	0.00415699	0.00187638	LDLR/SLC1A1/SLC25A25/APOA5	4
BP	GO:0038111	interleukin-7-mediated signaling pathway	2/11	30/18670	0.000136053	0.00427492	0.00192961	IRS1/SOCS2	2
BP	GO:0046627	negative regulation of insulin receptor signaling pathway	2/11	36/18670	0.000196662	0.00518481	0.00234032	IRS1/SOCS2	2
BP	GO:0045923	positive regulation of fatty acid metabolic process	2/11	37/18670	0.000207833	0.00518481	0.00234032	IRS1/APOA5	2
BP	GO:0050892	intestinal absorption	2/11	38/18670	0.000219309	0.00518481	0.00234032	LDLR/APOA5	2
BP	GO:1900077	negative regulation of cellular response to insulin stimulus	2/11	38/18670	0.000219309	0.00518481	0.00234032	IRS1/SOCS2	2
BP	GO:0032869	cellular response to insulin stimulus	3/11	216/18670	0.0002353	0.00518481	0.00234032	FOXO1/IRS1/SOCS2	3
BP	GO:0044242	cellular lipid catabolic process	3/11	217/18670	0.000238522	0.00518481	0.00234032	IRS1/LDLR/APOA5	3
BP	GO:0090207	regulation of triglyceride metabolic process	2/11	40/18670	0.000243174	0.00518481	0.00234032	LDLR/APOA5	2
BP	GO:0098760	response to interleukin-7	2/11	40/18670	0.000243174	0.00518481	0.00234032	IRS1/SOCS2	2
BP	GO:0098761	cellular response to interleukin-7	2/11	40/18670	0.000243174	0.00518481	0.00234032	IRS1/SOCS2	2
BP	GO:0010907	positive regulation of glucose metabolic process	2/11	42/18670	0.000268254	0.00552233	0.00249267	FOXO1/IRS1	2
BP	GO:0043551	regulation of phosphatidylinositol 3-kinase activity	2/11	55/18670	0.000460739	0.00891194	0.00402267	IRS1/SOCS2	2
BP	GO:0032868	response to insulin	3/11	272/18670	0.000462764	0.00891194	0.00402267	FOXO1/IRS1/SOCS2	3
BP	GO:0071398	cellular response to fatty acid	2/11	57/18670	0.000494859	0.00923222	0.00416724	IRS1/LDLR	2
BP	GO:0010676	positive regulation of cellular carbohydrate metabolic process	2/11	62/18670	0.000585386	0.0105902	0.00478019	FOXO1/IRS1	2
BP	GO:0043550	regulation of lipid kinase activity	2/11	64/18670	0.000623681	0.0106382	0.00480187	IRS1/SOCS2	2
BP	GO:0046503	glycerolipid catabolic process	2/11	64/18670	0.000623681	0.0106382	0.00480187	LDLR/APOA5	2
BP	GO:0046626	regulation of insulin receptor signaling pathway	2/11	66/18670	0.000663162	0.0109974	0.00496402	IRS1/SOCS2	2
BP	GO:0006650	glycerophospholipid metabolic process	3/11	319/18670	0.000736432	0.0117818	0.00531805	LDLR/SOCS2/APOA5	3
BP	GO:0071375	cellular response to peptide hormone stimulus	3/11	321/18670	0.000749929	0.0117818	0.00531805	FOXO1/IRS1/SOCS2	3
BP	GO:0008202	steroid metabolic process	3/11	331/18670	0.000819797	0.0121475	0.00548315	CYP2C8/LDLR/APOA5	3
BP	GO:1900076	regulation of cellular response to insulin stimulus	2/11	74/18670	0.000832914	0.0121475	0.00548315	IRS1/SOCS2	2
BP	GO:0016042	lipid catabolic process	3/11	333/18670	0.000834253	0.0121475	0.00548315	IRS1/LDLR/APOA5	3
BP	GO:0015914	phospholipid transport	2/11	75/18670	0.000855459	0.0121597	0.00548866	LDLR/APOA5	2
BP	GO:0001101	response to acid chemical	3/11	343/18670	0.000908984	0.0126201	0.00569645	FOXO1/IRS1/LDLR	3
BP	GO:0045913	positive regulation of carbohydrate metabolic process	2/11	83/18670	0.00104636	0.0138817	0.00626592	FOXO1/IRS1	2
BP	GO:0046470	phosphatidylcholine metabolic process	2/11	83/18670	0.00104636	0.0138817	0.00626592	LDLR/APOA5	2
BP	GO:0046889	positive regulation of lipid biosynthetic process	2/11	84/18670	0.00107154	0.0139067	0.00627719	LDLR/APOA5	2
BP	GO:0070542	response to fatty acid	2/11	86/18670	0.00112276	0.0142615	0.00643734	IRS1/LDLR	2
BP	GO:0006631	fatty acid metabolic process	3/11	383/18670	0.00125038	0.0154647	0.00698047	CYP2C8/IRS1/APOA5	3
BP	GO:1901653	cellular response to peptide	3/11	385/18670	0.0012693	0.0154647	0.00698047	FOXO1/IRS1/SOCS2	3
BP	GO:0019217	regulation of fatty acid metabolic process	2/11	96/18670	0.00139627	0.0160537	0.00724633	IRS1/APOA5	2
BP	GO:0042632	cholesterol homeostasis	2/11	96/18670	0.00139627	0.0160537	0.00724633	LDLR/APOA5	2
BP	GO:0043255	regulation of carbohydrate biosynthetic process	2/11	97/18670	0.00142521	0.0160537	0.00724633	FOXO1/IRS1	2
BP	GO:0055092	sterol homeostasis	2/11	97/18670	0.00142521	0.0160537	0.00724633	LDLR/APOA5	2
BP	GO:0022600	digestive system process	2/11	100/18670	0.00151374	0.0163847	0.00739571	LDLR/APOA5	2
BP	GO:0030301	cholesterol transport	2/11	100/18670	0.00151374	0.0163847	0.00739571	LDLR/APOA5	2
BP	GO:0097006	regulation of plasma lipoprotein particle levels	2/11	101/18670	0.00154382	0.0163847	0.00739571	LDLR/APOA5	2
BP	GO:0046486	glycerolipid metabolic process	3/11	414/18670	0.00156437	0.0163847	0.00739571	LDLR/SOCS2/APOA5	3
BP	GO:0006641	triglyceride metabolic process	2/11	105/18670	0.00166702	0.0171588	0.00774513	LDLR/APOA5	2
BP	GO:0043434	response to peptide hormone	3/11	436/18670	0.00181492	0.0183645	0.00828938	FOXO1/IRS1/SOCS2	3
BP	GO:0015918	sterol transport	2/11	112/18670	0.00189357	0.018841	0.00850446	LDLR/APOA5	2
BP	GO:0010906	regulation of glucose metabolic process	2/11	117/18670	0.00206389	0.0201991	0.00911744	FOXO1/IRS1	2
BP	GO:0019218	regulation of steroid metabolic process	2/11	124/18670	0.00231415	0.0222831	0.0100581	LDLR/APOA5	2
BP	GO:0006639	acylglycerol metabolic process	2/11	129/18670	0.00250131	0.023325	0.0105284	LDLR/APOA5	2
BP	GO:0006638	neutral lipid metabolic process	2/11	130/18670	0.00253957	0.023325	0.0105284	LDLR/APOA5	2
BP	GO:0042157	lipoprotein metabolic process	2/11	130/18670	0.00253957	0.023325	0.0105284	LDLR/APOA5	2
BP	GO:0031667	response to nutrient levels	3/11	499/18670	0.00266807	0.0241339	0.0108936	FOXO1/LDLR/SLC25A25	3
BP	GO:0007586	digestion	2/11	139/18670	0.00289645	0.0258086	0.0116495	LDLR/APOA5	2
BP	GO:0010675	regulation of cellular carbohydrate metabolic process	2/11	142/18670	0.00302037	0.0265171	0.0119693	FOXO1/IRS1	2
BP	GO:0035264	multicellular organism growth	2/11	146/18670	0.00318945	0.0275956	0.0124561	SOCS2/SLC25A25	2
BP	GO:0008203	cholesterol metabolic process	2/11	150/18670	0.0033629	0.0286471	0.0129307	LDLR/APOA5	2
BP	GO:0055088	lipid homeostasis	2/11	151/18670	0.00340694	0.0286471	0.0129307	LDLR/APOA5	2
BP	GO:1902652	secondary alcohol metabolic process	2/11	155/18670	0.00358584	0.0297326	0.0134207	LDLR/APOA5	2
BP	GO:0006633	fatty acid biosynthetic process	2/11	164/18670	0.00400418	0.0327465	0.0147811	CYP2C8/APOA5	2
BP	GO:0016125	sterol metabolic process	2/11	166/18670	0.0041001	0.0330778	0.0149307	LDLR/APOA5	2
BP	GO:0001659	temperature homeostasis	2/11	173/18670	0.00444426	0.0353763	0.0159682	FOXO1/GADD45G	2
BP	GO:0071466	cellular response to xenobiotic stimulus	2/11	180/18670	0.00480146	0.0376308	0.0169858	CYP2C8/FOXO1	2
BP	GO:0010565	regulation of cellular ketone metabolic process	2/11	181/18670	0.00485355	0.0376308	0.0169858	IRS1/APOA5	2
BP	GO:0046890	regulation of lipid biosynthetic process	2/11	198/18670	0.00577919	0.0420847	0.0189962	LDLR/APOA5	2
BP	GO:0032000	positive regulation of fatty acid beta-oxidation	1/11	10/18670	0.00587762	0.0420847	0.0189962	IRS1	1
BP	GO:0035376	sterol import	1/11	10/18670	0.00587762	0.0420847	0.0189962	LDLR	1
BP	GO:0051006	positive regulation of lipoprotein lipase activity	1/11	10/18670	0.00587762	0.0420847	0.0189962	APOA5	1
BP	GO:0070508	cholesterol import	1/11	10/18670	0.00587762	0.0420847	0.0189962	LDLR	1
BP	GO:1904350	regulation of protein catabolic process in the vacuole	1/11	10/18670	0.00587762	0.0420847	0.0189962	LDLR	1
BP	GO:0097164	ammonium ion metabolic process	2/11	205/18670	0.00618219	0.0420847	0.0189962	LDLR/APOA5	2
BP	GO:0006109	regulation of carbohydrate metabolic process	2/11	206/18670	0.0062408	0.0420847	0.0189962	FOXO1/IRS1	2
BP	GO:0006006	glucose metabolic process	2/11	209/18670	0.00641815	0.0420847	0.0189962	FOXO1/IRS1	2
BP	GO:0071229	cellular response to acid chemical	2/11	209/18670	0.00641815	0.0420847	0.0189962	IRS1/LDLR	2
BP	GO:0000185	activation of MAPKKK activity	1/11	11/18670	0.00646365	0.0420847	0.0189962	GADD45G	1
BP	GO:0040015	negative regulation of multicellular organism growth	1/11	11/18670	0.00646365	0.0420847	0.0189962	SOCS2	1
BP	GO:0061365	positive regulation of triglyceride lipase activity	1/11	11/18670	0.00646365	0.0420847	0.0189962	APOA5	1
BP	GO:1905146	lysosomal protein catabolic process	1/11	11/18670	0.00646365	0.0420847	0.0189962	LDLR	1
BP	GO:0015893	drug transport	2/11	214/18670	0.00671886	0.0420847	0.0189962	SLC1A1/SLC25A25	2
BP	GO:0016051	carbohydrate biosynthetic process	2/11	214/18670	0.00671886	0.0420847	0.0189962	FOXO1/IRS1	2
BP	GO:0045732	positive regulation of protein catabolic process	2/11	214/18670	0.00671886	0.0420847	0.0189962	FOXO1/LDLR	2
BP	GO:0010896	regulation of triglyceride catabolic process	1/11	12/18670	0.00704937	0.0420847	0.0189962	APOA5	1
BP	GO:0015867	ATP transport	1/11	12/18670	0.00704937	0.0420847	0.0189962	SLC25A25	1
BP	GO:0033700	phospholipid efflux	1/11	12/18670	0.00704937	0.0420847	0.0189962	APOA5	1
BP	GO:0034372	very-low-density lipoprotein particle remodeling	1/11	12/18670	0.00704937	0.0420847	0.0189962	APOA5	1
BP	GO:0060213	positive regulation of nuclear-transcribed mRNA poly(A) tail shortening	1/11	12/18670	0.00704937	0.0420847	0.0189962	TOB1	1
BP	GO:1900402	regulation of carbohydrate metabolic process by regulation of transcription from RNA polymerase II promoter	1/11	12/18670	0.00704937	0.0420847	0.0189962	FOXO1	1
BP	GO:0010872	regulation of cholesterol esterification	1/11	13/18670	0.00763477	0.044252	0.0199745	APOA5	1
BP	GO:0014745	negative regulation of muscle adaptation	1/11	13/18670	0.00763477	0.044252	0.0199745	FOXO1	1
BP	GO:0098712	L-glutamate import across plasma membrane	1/11	13/18670	0.00763477	0.044252	0.0199745	SLC1A1	1
BP	GO:0032872	regulation of stress-activated MAPK cascade	2/11	237/18670	0.00818375	0.0443844	0.0200342	FOXO1/GADD45G	2
BP	GO:0010867	positive regulation of triglyceride biosynthetic process	1/11	14/18670	0.00821986	0.0443844	0.0200342	LDLR	1
BP	GO:0034370	triglyceride-rich lipoprotein particle remodeling	1/11	14/18670	0.00821986	0.0443844	0.0200342	APOA5	1
BP	GO:0036295	cellular response to increased oxygen levels	1/11	14/18670	0.00821986	0.0443844	0.0200342	FOXO1	1
BP	GO:0051938	L-glutamate import	1/11	14/18670	0.00821986	0.0443844	0.0200342	SLC1A1	1
BP	GO:0060211	regulation of nuclear-transcribed mRNA poly(A) tail shortening	1/11	14/18670	0.00821986	0.0443844	0.0200342	TOB1	1
BP	GO:0070302	regulation of stress-activated protein kinase signaling cascade	2/11	239/18670	0.0083174	0.0443844	0.0200342	FOXO1/GADD45G	2
BP	GO:0042593	glucose homeostasis	2/11	241/18670	0.00845204	0.0443844	0.0200342	FOXO1/IRS1	2
BP	GO:0033500	carbohydrate homeostasis	2/11	242/18670	0.00851974	0.0443844	0.0200342	FOXO1/IRS1	2
BP	GO:0007039	protein catabolic process in the vacuole	1/11	15/18670	0.00880464	0.0443844	0.0200342	LDLR	1
BP	GO:0034380	high-density lipoprotein particle assembly	1/11	15/18670	0.00880464	0.0443844	0.0200342	APOA5	1
BP	GO:0042159	lipoprotein catabolic process	1/11	15/18670	0.00880464	0.0443844	0.0200342	LDLR	1
BP	GO:0046321	positive regulation of fatty acid oxidation	1/11	15/18670	0.00880464	0.0443844	0.0200342	IRS1	1
BP	GO:0048712	negative regulation of astrocyte differentiation	1/11	15/18670	0.00880464	0.0443844	0.0200342	LDLR	1
BP	GO:0042180	cellular ketone metabolic process	2/11	248/18670	0.0089311	0.0443844	0.0200342	IRS1/APOA5	2
BP	GO:0019318	hexose metabolic process	2/11	249/18670	0.00900053	0.0443844	0.0200342	FOXO1/IRS1	2
BP	GO:0043031	negative regulation of macrophage activation	1/11	16/18670	0.0093891	0.0443844	0.0200342	LDLR	1
BP	GO:0045722	positive regulation of gluconeogenesis	1/11	16/18670	0.0093891	0.0443844	0.0200342	FOXO1	1
BP	GO:0051503	adenine nucleotide transport	1/11	16/18670	0.0093891	0.0443844	0.0200342	SLC25A25	1
BP	GO:0071732	cellular response to nitric oxide	1/11	16/18670	0.0093891	0.0443844	0.0200342	FOXO1	1
BP	GO:1990000	amyloid fibril formation	1/11	16/18670	0.0093891	0.0443844	0.0200342	LDLR	1
BP	GO:0015850	organic hydroxy compound transport	2/11	262/18670	0.00992531	0.0443844	0.0200342	LDLR/APOA5	2
BP	GO:0015868	purine ribonucleotide transport	1/11	17/18670	0.00997325	0.0443844	0.0200342	SLC25A25	1
BP	GO:0034384	high-density lipoprotein particle clearance	1/11	17/18670	0.00997325	0.0443844	0.0200342	LDLR	1
BP	GO:0034433	steroid esterification	1/11	17/18670	0.00997325	0.0443844	0.0200342	APOA5	1
BP	GO:0034434	sterol esterification	1/11	17/18670	0.00997325	0.0443844	0.0200342	APOA5	1
BP	GO:0034435	cholesterol esterification	1/11	17/18670	0.00997325	0.0443844	0.0200342	APOA5	1
BP	GO:0045725	positive regulation of glycogen biosynthetic process	1/11	17/18670	0.00997325	0.0443844	0.0200342	IRS1	1
BP	GO:0070166	enamel mineralization	1/11	17/18670	0.00997325	0.0443844	0.0200342	FOXO1	1
BP	GO:0010612	regulation of cardiac muscle adaptation	1/11	18/18670	0.0105571	0.0443844	0.0200342	FOXO1	1
BP	GO:0015865	purine nucleotide transport	1/11	18/18670	0.0105571	0.0443844	0.0200342	SLC25A25	1
BP	GO:0031998	regulation of fatty acid beta-oxidation	1/11	18/18670	0.0105571	0.0443844	0.0200342	IRS1	1
BP	GO:0060749	mammary gland alveolus development	1/11	18/18670	0.0105571	0.0443844	0.0200342	SOCS2	1
BP	GO:0061377	mammary gland lobule development	1/11	18/18670	0.0105571	0.0443844	0.0200342	SOCS2	1
BP	GO:0070233	negative regulation of T cell apoptotic process	1/11	18/18670	0.0105571	0.0443844	0.0200342	TSC22D3	1
BP	GO:0070875	positive regulation of glycogen metabolic process	1/11	18/18670	0.0105571	0.0443844	0.0200342	IRS1	1
BP	GO:0150079	negative regulation of neuroinflammatory response	1/11	18/18670	0.0105571	0.0443844	0.0200342	LDLR	1
BP	GO:1900153	positive regulation of nuclear-transcribed mRNA catabolic process, deadenylation-dependent decay	1/11	18/18670	0.0105571	0.0443844	0.0200342	TOB1	1
BP	GO:1903242	regulation of cardiac muscle hypertrophy in response to stress	1/11	18/18670	0.0105571	0.0443844	0.0200342	FOXO1	1
BP	GO:0070989	oxidative demethylation	1/11	19/18670	0.0111406	0.0458686	0.0207041	CYP2C8	1
BP	GO:0071731	response to nitric oxide	1/11	19/18670	0.0111406	0.0458686	0.0207041	FOXO1	1
BP	GO:1902170	cellular response to reactive nitrogen species	1/11	19/18670	0.0111406	0.0458686	0.0207041	FOXO1	1
BP	GO:0015980	energy derivation by oxidation of organic compounds	2/11	285/18670	0.0116615	0.0464153	0.0209509	IRS1/SLC25A25	2
BP	GO:0019373	epoxygenase P450 pathway	1/11	20/18670	0.0117238	0.0464153	0.0209509	CYP2C8	1
BP	GO:1900151	regulation of nuclear-transcribed mRNA catabolic process, deadenylation-dependent decay	1/11	20/18670	0.0117238	0.0464153	0.0209509	TOB1	1
BP	GO:1903978	regulation of microglial cell activation	1/11	20/18670	0.0117238	0.0464153	0.0209509	LDLR	1
BP	GO:0044262	cellular carbohydrate metabolic process	2/11	286/18670	0.0117399	0.0464153	0.0209509	FOXO1/IRS1	2
BP	GO:0051403	stress-activated MAPK cascade	2/11	286/18670	0.0117399	0.0464153	0.0209509	FOXO1/GADD45G	2
BP	GO:0005996	monosaccharide metabolic process	2/11	292/18670	0.0122149	0.0476622	0.0215137	FOXO1/IRS1	2
BP	GO:0009410	response to xenobiotic stimulus	2/11	292/18670	0.0122149	0.0476622	0.0215137	CYP2C8/FOXO1	2
BP	GO:0055093	response to hyperoxia	1/11	21/18670	0.0123067	0.0477085	0.0215347	FOXO1	1
BP	GO:0010866	regulation of triglyceride biosynthetic process	1/11	22/18670	0.0128893	0.0483957	0.0218448	LDLR	1
BP	GO:0045723	positive regulation of fatty acid biosynthetic process	1/11	22/18670	0.0128893	0.0483957	0.0218448	APOA5	1
BP	GO:0046628	positive regulation of insulin receptor signaling pathway	1/11	22/18670	0.0128893	0.0483957	0.0218448	IRS1	1
BP	GO:0060390	regulation of SMAD protein signal transduction	1/11	22/18670	0.0128893	0.0483957	0.0218448	TOB1	1
BP	GO:0071404	cellular response to low-density lipoprotein particle stimulus	1/11	22/18670	0.0128893	0.0483957	0.0218448	LDLR	1
BP	GO:0015740	C4-dicarboxylate transport	1/11	23/18670	0.0134716	0.0489882	0.0221123	SLC1A1	1
BP	GO:0015813	L-glutamate transmembrane transport	1/11	23/18670	0.0134716	0.0489882	0.0221123	SLC1A1	1
BP	GO:0051004	regulation of lipoprotein lipase activity	1/11	23/18670	0.0134716	0.0489882	0.0221123	APOA5	1
BP	GO:0089718	amino acid import across plasma membrane	1/11	23/18670	0.0134716	0.0489882	0.0221123	SLC1A1	1
BP	GO:0097150	neuronal stem cell population maintenance	1/11	23/18670	0.0134716	0.0489882	0.0221123	FOXO1	1
BP	GO:0006862	nucleotide transport	1/11	24/18670	0.0140535	0.0489882	0.0221123	SLC25A25	1
BP	GO:0034505	tooth mineralization	1/11	24/18670	0.0140535	0.0489882	0.0221123	FOXO1	1
BP	GO:0042738	exogenous drug catabolic process	1/11	24/18670	0.0140535	0.0489882	0.0221123	CYP2C8	1
BP	GO:0046426	negative regulation of JAK-STAT cascade	1/11	24/18670	0.0140535	0.0489882	0.0221123	SOCS2	1
BP	GO:0046475	glycerophospholipid catabolic process	1/11	24/18670	0.0140535	0.0489882	0.0221123	LDLR	1
BP	GO:0060396	growth hormone receptor signaling pathway	1/11	24/18670	0.0140535	0.0489882	0.0221123	SOCS2	1
BP	GO:1900078	positive regulation of cellular response to insulin stimulus	1/11	24/18670	0.0140535	0.0489882	0.0221123	IRS1	1
BP	GO:0031098	stress-activated protein kinase signaling cascade	2/11	315/18670	0.0141139	0.0489882	0.0221123	FOXO1/GADD45G	2
BP	GO:0006898	receptor-mediated endocytosis	2/11	316/18670	0.0141992	0.0489995	0.0221174	LDLR/APOA5	2
BP	GO:0071378	cellular response to growth hormone stimulus	1/11	25/18670	0.0146352	0.0499269	0.022536	SOCS2	1
BP	GO:0097186	amelogenesis	1/11	25/18670	0.0146352	0.0499269	0.022536	FOXO1	1
BP	GO:0010460	positive regulation of heart rate	1/11	26/18670	0.0152165	0.0507501	0.0229076	SLC1A1	1
BP	GO:0032366	intracellular sterol transport	1/11	26/18670	0.0152165	0.0507501	0.0229076	LDLR	1
BP	GO:0032367	intracellular cholesterol transport	1/11	26/18670	0.0152165	0.0507501	0.0229076	LDLR	1
BP	GO:0043090	amino acid import	1/11	26/18670	0.0152165	0.0507501	0.0229076	SLC1A1	1
BP	GO:0002021	response to dietary excess	1/11	27/18670	0.0157975	0.0521057	0.0235195	SLC25A25	1
BP	GO:0048143	astrocyte activation	1/11	27/18670	0.0157975	0.0521057	0.0235195	LDLR	1
BP	GO:0034368	protein-lipid complex remodeling	1/11	28/18670	0.0163783	0.0525689	0.0237285	APOA5	1
BP	GO:0034369	plasma lipoprotein particle remodeling	1/11	28/18670	0.0163783	0.0525689	0.0237285	APOA5	1
BP	GO:0034377	plasma lipoprotein particle assembly	1/11	28/18670	0.0163783	0.0525689	0.0237285	APOA5	1
BP	GO:0036296	response to increased oxygen levels	1/11	28/18670	0.0163783	0.0525689	0.0237285	FOXO1	1
BP	GO:0045686	negative regulation of glial cell differentiation	1/11	28/18670	0.0163783	0.0525689	0.0237285	LDLR	1
BP	GO:0072330	monocarboxylic acid biosynthetic process	2/11	343/18670	0.0165889	0.0529603	0.0239052	CYP2C8/APOA5	2
BP	GO:0005979	regulation of glycogen biosynthetic process	1/11	29/18670	0.0169587	0.0530069	0.0239262	IRS1	1
BP	GO:0010962	regulation of glucan biosynthetic process	1/11	29/18670	0.0169587	0.0530069	0.0239262	IRS1	1
BP	GO:0034367	protein-containing complex remodeling	1/11	29/18670	0.0169587	0.0530069	0.0239262	APOA5	1
BP	GO:0070229	negative regulation of lymphocyte apoptotic process	1/11	29/18670	0.0169587	0.0530069	0.0239262	TSC22D3	1
BP	GO:0042759	long-chain fatty acid biosynthetic process	1/11	30/18670	0.0175387	0.0531557	0.0239934	CYP2C8	1
BP	GO:0045940	positive regulation of steroid metabolic process	1/11	30/18670	0.0175387	0.0531557	0.0239934	APOA5	1
BP	GO:0046320	regulation of fatty acid oxidation	1/11	30/18670	0.0175387	0.0531557	0.0239934	IRS1	1
BP	GO:0071549	cellular response to dexamethasone stimulus	1/11	30/18670	0.0175387	0.0531557	0.0239934	FOXO1	1
BP	GO:1904893	negative regulation of STAT cascade	1/11	30/18670	0.0175387	0.0531557	0.0239934	SOCS2	1
BP	GO:0003299	muscle hypertrophy in response to stress	1/11	31/18670	0.0181185	0.0531557	0.0239934	FOXO1	1
BP	GO:0014887	cardiac muscle adaptation	1/11	31/18670	0.0181185	0.0531557	0.0239934	FOXO1	1
BP	GO:0014898	cardiac muscle hypertrophy in response to stress	1/11	31/18670	0.0181185	0.0531557	0.0239934	FOXO1	1
BP	GO:0048710	regulation of astrocyte differentiation	1/11	31/18670	0.0181185	0.0531557	0.0239934	LDLR	1
BP	GO:0043687	post-translational protein modification	2/11	361/18670	0.0182724	0.0531557	0.0239934	SOCS2/APOA5	2
BP	GO:0006066	alcohol metabolic process	2/11	364/18670	0.0185599	0.0531557	0.0239934	LDLR/APOA5	2
BP	GO:0006869	lipid transport	2/11	365/18670	0.0186562	0.0531557	0.0239934	LDLR/APOA5	2
BP	GO:0007616	long-term memory	1/11	32/18670	0.018698	0.0531557	0.0239934	LDLR	1
BP	GO:0008210	estrogen metabolic process	1/11	32/18670	0.018698	0.0531557	0.0239934	CYP2C8	1
BP	GO:0042573	retinoic acid metabolic process	1/11	32/18670	0.018698	0.0531557	0.0239934	CYP2C8	1
BP	GO:0043552	positive regulation of phosphatidylinositol 3-kinase activity	1/11	32/18670	0.018698	0.0531557	0.0239934	IRS1	1
BP	GO:0055094	response to lipoprotein particle	1/11	32/18670	0.018698	0.0531557	0.0239934	LDLR	1
BP	GO:0065005	protein-lipid complex assembly	1/11	32/18670	0.018698	0.0531557	0.0239934	APOA5	1
BP	GO:1900745	positive regulation of p38MAPK cascade	1/11	32/18670	0.018698	0.0531557	0.0239934	GADD45G	1
BP	GO:0070232	regulation of T cell apoptotic process	1/11	33/18670	0.0192772	0.0545425	0.0246194	TSC22D3	1
BP	GO:0071402	cellular response to lipoprotein particle stimulus	1/11	34/18670	0.019856	0.0556527	0.0251205	LDLR	1
BP	GO:0097009	energy homeostasis	1/11	34/18670	0.019856	0.0556527	0.0251205	FOXO1	1
BP	GO:0042176	regulation of protein catabolic process	2/11	381/18670	0.0202257	0.0564241	0.0254687	FOXO1/LDLR	2
BP	GO:0019433	triglyceride catabolic process	1/11	35/18670	0.0204345	0.0564788	0.0254934	APOA5	1
BP	GO:0070873	regulation of glycogen metabolic process	1/11	35/18670	0.0204345	0.0564788	0.0254934	IRS1	1
BP	GO:0090218	positive regulation of lipid kinase activity	1/11	36/18670	0.0210128	0.0575441	0.0259742	IRS1	1
BP	GO:0097242	amyloid-beta clearance	1/11	36/18670	0.0210128	0.0575441	0.0259742	LDLR	1
BP	GO:0000289	nuclear-transcribed mRNA poly(A) tail shortening	1/11	37/18670	0.0215907	0.0577924	0.0260863	TOB1	1
BP	GO:0010614	negative regulation of cardiac muscle hypertrophy	1/11	37/18670	0.0215907	0.0577924	0.0260863	FOXO1	1
BP	GO:0032885	regulation of polysaccharide biosynthetic process	1/11	37/18670	0.0215907	0.0577924	0.0260863	IRS1	1
BP	GO:0043029	T cell homeostasis	1/11	37/18670	0.0215907	0.0577924	0.0260863	TSC22D3	1
BP	GO:0010876	lipid localization	2/11	400/18670	0.0221604	0.0577924	0.0260863	LDLR/APOA5	2
BP	GO:0015804	neutral amino acid transport	1/11	38/18670	0.0221683	0.0577924	0.0260863	SLC1A1	1
BP	GO:0032094	response to food	1/11	38/18670	0.0221683	0.0577924	0.0260863	SLC25A25	1
BP	GO:0046326	positive regulation of glucose import	1/11	38/18670	0.0221683	0.0577924	0.0260863	IRS1	1
BP	GO:0046676	negative regulation of insulin secretion	1/11	38/18670	0.0221683	0.0577924	0.0260863	IRS1	1
BP	GO:0048009	insulin-like growth factor receptor signaling pathway	1/11	38/18670	0.0221683	0.0577924	0.0260863	IRS1	1
BP	GO:0060416	response to growth hormone	1/11	38/18670	0.0221683	0.0577924	0.0260863	SOCS2	1
BP	GO:0014741	negative regulation of muscle hypertrophy	1/11	39/18670	0.0227456	0.0585306	0.0264195	FOXO1	1
BP	GO:0055090	acylglycerol homeostasis	1/11	39/18670	0.0227456	0.0585306	0.0264195	APOA5	1
BP	GO:0070328	triglyceride homeostasis	1/11	39/18670	0.0227456	0.0585306	0.0264195	APOA5	1
BP	GO:0009395	phospholipid catabolic process	1/11	40/18670	0.0233226	0.0589982	0.0266306	LDLR	1
BP	GO:0044058	regulation of digestive system process	1/11	40/18670	0.0233226	0.0589982	0.0266306	APOA5	1
BP	GO:0045823	positive regulation of heart contraction	1/11	40/18670	0.0233226	0.0589982	0.0266306	SLC1A1	1
BP	GO:0071548	response to dexamethasone	1/11	40/18670	0.0233226	0.0589982	0.0266306	FOXO1	1
BP	GO:0019432	triglyceride biosynthetic process	1/11	41/18670	0.0238992	0.0599489	0.0270597	LDLR	1
BP	GO:0150077	regulation of neuroinflammatory response	1/11	41/18670	0.0238992	0.0599489	0.0270597	LDLR	1
BP	GO:0032365	intracellular lipid transport	1/11	43/18670	0.0250517	0.0605499	0.027331	LDLR	1
BP	GO:0032881	regulation of polysaccharide metabolic process	1/11	43/18670	0.0250517	0.0605499	0.027331	IRS1	1
BP	GO:0034383	low-density lipoprotein particle clearance	1/11	43/18670	0.0250517	0.0605499	0.027331	LDLR	1
BP	GO:0046460	neutral lipid biosynthetic process	1/11	43/18670	0.0250517	0.0605499	0.027331	LDLR	1
BP	GO:0046461	neutral lipid catabolic process	1/11	43/18670	0.0250517	0.0605499	0.027331	APOA5	1
BP	GO:0046463	acylglycerol biosynthetic process	1/11	43/18670	0.0250517	0.0605499	0.027331	LDLR	1
BP	GO:0046464	acylglycerol catabolic process	1/11	43/18670	0.0250517	0.0605499	0.027331	APOA5	1
BP	GO:0060612	adipose tissue development	1/11	43/18670	0.0250517	0.0605499	0.027331	SLC25A25	1
BP	GO:0072348	sulfur compound transport	1/11	43/18670	0.0250517	0.0605499	0.027331	SLC1A1	1
BP	GO:0010828	positive regulation of glucose transmembrane transport	1/11	44/18670	0.0256274	0.0611982	0.0276236	IRS1	1
BP	GO:0014002	astrocyte development	1/11	44/18670	0.0256274	0.0611982	0.0276236	LDLR	1
BP	GO:0014047	glutamate secretion	1/11	44/18670	0.0256274	0.0611982	0.0276236	SLC1A1	1
BP	GO:0014014	negative regulation of gliogenesis	1/11	45/18670	0.0262028	0.061587	0.0277991	LDLR	1
BP	GO:0031018	endocrine pancreas development	1/11	45/18670	0.0262028	0.061587	0.0277991	FOXO1	1
BP	GO:0071827	plasma lipoprotein particle organization	1/11	45/18670	0.0262028	0.061587	0.0277991	APOA5	1
BP	GO:0090278	negative regulation of peptide hormone secretion	1/11	45/18670	0.0262028	0.061587	0.0277991	IRS1	1
BP	GO:0001504	neurotransmitter uptake	1/11	46/18670	0.026778	0.0622041	0.0280777	SLC1A1	1
BP	GO:0005978	glycogen biosynthetic process	1/11	46/18670	0.026778	0.0622041	0.0280777	IRS1	1
BP	GO:0009250	glucan biosynthetic process	1/11	46/18670	0.026778	0.0622041	0.0280777	IRS1	1
BP	GO:0070231	T cell apoptotic process	1/11	47/18670	0.0273528	0.0626789	0.028292	TSC22D3	1
BP	GO:1900744	regulation of p38MAPK cascade	1/11	47/18670	0.0273528	0.0626789	0.028292	GADD45G	1
BP	GO:2000107	negative regulation of leukocyte apoptotic process	1/11	47/18670	0.0273528	0.0626789	0.028292	TSC22D3	1
BP	GO:0001774	microglial cell activation	1/11	48/18670	0.0279273	0.0626789	0.028292	LDLR	1
BP	GO:0002269	leukocyte activation involved in inflammatory response	1/11	48/18670	0.0279273	0.0626789	0.028292	LDLR	1
BP	GO:0006111	regulation of gluconeogenesis	1/11	48/18670	0.0279273	0.0626789	0.028292	FOXO1	1
BP	GO:0007595	lactation	1/11	48/18670	0.0279273	0.0626789	0.028292	SOCS2	1
BP	GO:0061014	positive regulation of mRNA catabolic process	1/11	48/18670	0.0279273	0.0626789	0.028292	TOB1	1
BP	GO:1903727	positive regulation of phospholipid metabolic process	1/11	48/18670	0.0279273	0.0626789	0.028292	IRS1	1
BP	GO:0071825	protein-lipid complex subunit organization	1/11	49/18670	0.0285015	0.0634164	0.0286249	APOA5	1
BP	GO:0046394	carboxylic acid biosynthetic process	2/11	462/18670	0.0289893	0.0634164	0.0286249	CYP2C8/APOA5	2
BP	GO:0009409	response to cold	1/11	50/18670	0.0290754	0.0634164	0.0286249	FOXO1	1
BP	GO:0032873	negative regulation of stress-activated MAPK cascade	1/11	50/18670	0.0290754	0.0634164	0.0286249	FOXO1	1
BP	GO:0046854	phosphatidylinositol phosphorylation	1/11	50/18670	0.0290754	0.0634164	0.0286249	SOCS2	1
BP	GO:0070303	negative regulation of stress-activated protein kinase signaling cascade	1/11	50/18670	0.0290754	0.0634164	0.0286249	FOXO1	1
BP	GO:0002683	negative regulation of immune system process	2/11	463/18670	0.0291057	0.0634164	0.0286249	TSC22D3/LDLR	2
BP	GO:0016053	organic acid biosynthetic process	2/11	463/18670	0.0291057	0.0634164	0.0286249	CYP2C8/APOA5	2
BP	GO:0019369	arachidonic acid metabolic process	1/11	51/18670	0.029649	0.0634424	0.0286366	CYP2C8	1
BP	GO:0045599	negative regulation of fat cell differentiation	1/11	51/18670	0.029649	0.0634424	0.0286366	FOXO1	1
BP	GO:0045668	negative regulation of osteoblast differentiation	1/11	51/18670	0.029649	0.0634424	0.0286366	TOB1	1
BP	GO:0048260	positive regulation of receptor-mediated endocytosis	1/11	51/18670	0.029649	0.0634424	0.0286366	APOA5	1
BP	GO:0097366	response to bronchodilator	1/11	51/18670	0.029649	0.0634424	0.0286366	FOXO1	1
BP	GO:0030514	negative regulation of BMP signaling pathway	1/11	52/18670	0.0302223	0.0642088	0.0289826	TOB1	1
BP	GO:1902373	negative regulation of mRNA catabolic process	1/11	52/18670	0.0302223	0.0642088	0.0289826	TOB1	1
BP	GO:0038066	p38MAPK cascade	1/11	53/18670	0.0307952	0.064735	0.0292201	GADD45G	1
BP	GO:0070228	regulation of lymphocyte apoptotic process	1/11	53/18670	0.0307952	0.064735	0.0292201	TSC22D3	1
BP	GO:1902475	L-alpha-amino acid transmembrane transport	1/11	53/18670	0.0307952	0.064735	0.0292201	SLC1A1	1
BP	GO:0048871	multicellular organismal homeostasis	2/11	485/18670	0.0317156	0.0662095	0.0298856	FOXO1/GADD45G	2
BP	GO:0042304	regulation of fatty acid biosynthetic process	1/11	55/18670	0.0319402	0.0662095	0.0298856	APOA5	1
BP	GO:0043030	regulation of macrophage activation	1/11	55/18670	0.0319402	0.0662095	0.0298856	LDLR	1
BP	GO:0046456	icosanoid biosynthetic process	1/11	55/18670	0.0319402	0.0662095	0.0298856	CYP2C8	1
BP	GO:0014888	striated muscle adaptation	1/11	57/18670	0.033084	0.0681075	0.0307423	FOXO1	1
BP	GO:0033344	cholesterol efflux	1/11	57/18670	0.033084	0.0681075	0.0307423	APOA5	1
BP	GO:0061900	glial cell activation	1/11	58/18670	0.0336555	0.0688093	0.0310591	LDLR	1
BP	GO:0071385	cellular response to glucocorticoid stimulus	1/11	58/18670	0.0336555	0.0688093	0.0310591	FOXO1	1
BP	GO:1902369	negative regulation of RNA catabolic process	1/11	59/18670	0.0342266	0.0697381	0.0314784	TOB1	1
BP	GO:0046324	regulation of glucose import	1/11	60/18670	0.0347974	0.07066	0.0318945	IRS1	1
BP	GO:0071384	cellular response to corticosteroid stimulus	1/11	61/18670	0.0353679	0.0715751	0.0323075	FOXO1	1
BP	GO:0002260	lymphocyte homeostasis	1/11	62/18670	0.0359381	0.0724833	0.0327175	TSC22D3	1
BP	GO:0032371	regulation of sterol transport	1/11	63/18670	0.036508	0.0728939	0.0329028	APOA5	1
BP	GO:0032374	regulation of cholesterol transport	1/11	63/18670	0.036508	0.0728939	0.0329028	APOA5	1
BP	GO:0090181	regulation of cholesterol metabolic process	1/11	63/18670	0.036508	0.0728939	0.0329028	LDLR	1
BP	GO:0046834	lipid phosphorylation	1/11	64/18670	0.0370776	0.0737845	0.0333048	SOCS2	1
BP	GO:0014823	response to activity	1/11	65/18670	0.0376469	0.0746684	0.0337038	SLC25A25	1
BP	GO:0015800	acidic amino acid transport	1/11	66/18670	0.0382159	0.075049	0.0338756	SLC1A1	1
BP	GO:0040014	regulation of multicellular organism growth	1/11	66/18670	0.0382159	0.075049	0.0338756	SOCS2	1
BP	GO:0046888	negative regulation of hormone secretion	1/11	66/18670	0.0382159	0.075049	0.0338756	IRS1	1
BP	GO:0015807	L-amino acid transport	1/11	67/18670	0.0387846	0.075916	0.0342669	SLC1A1	1
BP	GO:0046323	glucose import	1/11	68/18670	0.0393529	0.0767768	0.0346555	IRS1	1
BP	GO:0034381	plasma lipoprotein particle clearance	1/11	69/18670	0.039921	0.0773793	0.0349275	LDLR	1
BP	GO:0070227	lymphocyte apoptotic process	1/11	69/18670	0.039921	0.0773793	0.0349275	TSC22D3	1
BP	GO:0060395	SMAD protein signal transduction	1/11	70/18670	0.0404887	0.0779735	0.0351957	TOB1	1
BP	GO:0070988	demethylation	1/11	70/18670	0.0404887	0.0779735	0.0351957	CYP2C8	1
BP	GO:0033692	cellular polysaccharide biosynthetic process	1/11	71/18670	0.0410562	0.0788121	0.0355742	IRS1	1
BP	GO:0006635	fatty acid beta-oxidation	1/11	72/18670	0.0416233	0.0793902	0.0358351	IRS1	1
BP	GO:0060193	positive regulation of lipase activity	1/11	72/18670	0.0416233	0.0793902	0.0358351	APOA5	1
BP	GO:0045685	regulation of glial cell differentiation	1/11	73/18670	0.0421902	0.0799605	0.0360925	LDLR	1
BP	GO:1903524	positive regulation of blood circulation	1/11	73/18670	0.0421902	0.0799605	0.0360925	SLC1A1	1
BP	GO:0005977	glycogen metabolic process	1/11	74/18670	0.0427567	0.0805726	0.0363688	IRS1	1
BP	GO:0006073	cellular glucan metabolic process	1/11	75/18670	0.043323	0.0805726	0.0363688	IRS1	1
BP	GO:0006695	cholesterol biosynthetic process	1/11	75/18670	0.043323	0.0805726	0.0363688	APOA5	1
BP	GO:0010611	regulation of cardiac muscle hypertrophy	1/11	75/18670	0.043323	0.0805726	0.0363688	FOXO1	1
BP	GO:0044042	glucan metabolic process	1/11	75/18670	0.043323	0.0805726	0.0363688	IRS1	1
BP	GO:0150076	neuroinflammatory response	1/11	75/18670	0.043323	0.0805726	0.0363688	LDLR	1
BP	GO:0048844	artery morphogenesis	1/11	76/18670	0.0438889	0.0808693	0.0365028	LDLR	1
BP	GO:1901264	carbohydrate derivative transport	1/11	76/18670	0.0438889	0.0808693	0.0365028	SLC25A25	1
BP	GO:1902653	secondary alcohol biosynthetic process	1/11	76/18670	0.0438889	0.0808693	0.0365028	APOA5	1
BP	GO:0000288	nuclear-transcribed mRNA catabolic process, deadenylation-dependent decay	1/11	77/18670	0.0444545	0.0811989	0.0366515	TOB1	1
BP	GO:0000271	polysaccharide biosynthetic process	1/11	78/18670	0.0450198	0.0811989	0.0366515	IRS1	1
BP	GO:0010827	regulation of glucose transmembrane transport	1/11	78/18670	0.0450198	0.0811989	0.0366515	IRS1	1
BP	GO:0014743	regulation of muscle hypertrophy	1/11	78/18670	0.0450198	0.0811989	0.0366515	FOXO1	1
BP	GO:0031016	pancreas development	1/11	78/18670	0.0450198	0.0811989	0.0366515	FOXO1	1
BP	GO:0042246	tissue regeneration	1/11	78/18670	0.0450198	0.0811989	0.0366515	APOA5	1
BP	GO:1903313	positive regulation of mRNA metabolic process	1/11	78/18670	0.0450198	0.0811989	0.0366515	TOB1	1
BP	GO:1903312	negative regulation of mRNA metabolic process	1/11	79/18670	0.0455849	0.0819704	0.0369998	TOB1	1
BP	GO:0016126	sterol biosynthetic process	1/11	81/18670	0.046714	0.0834977	0.0376892	APOA5	1
BP	GO:0048708	astrocyte differentiation	1/11	81/18670	0.046714	0.0834977	0.0376892	LDLR	1
BP	GO:0006855	drug transmembrane transport	1/11	82/18670	0.0472781	0.084003	0.0379173	SLC1A1	1
BP	GO:0030279	negative regulation of ossification	1/11	82/18670	0.0472781	0.084003	0.0379173	TOB1	1
BP	GO:0006970	response to osmotic stress	1/11	83/18670	0.0478419	0.0845018	0.0381424	TSC22D3	1
BP	GO:2000106	regulation of leukocyte apoptotic process	1/11	83/18670	0.0478419	0.0845018	0.0381424	TSC22D3	1
BP	GO:0001776	leukocyte homeostasis	1/11	86/18670	0.0495315	0.0867164	0.039142	TSC22D3	1
BP	GO:0003333	amino acid transmembrane transport	1/11	86/18670	0.0495315	0.0867164	0.039142	SLC1A1	1
BP	GO:0034637	cellular carbohydrate biosynthetic process	1/11	86/18670	0.0495315	0.0867164	0.039142	IRS1	1
BP	GO:0006112	energy reserve metabolic process	1/11	87/18670	0.0500941	0.0874449	0.0394708	IRS1	1
BP	GO:1902476	chloride transmembrane transport	1/11	88/18670	0.0506563	0.0879123	0.0396818	SLC1A1	1
BP	GO:2000177	regulation of neural precursor cell proliferation	1/11	88/18670	0.0506563	0.0879123	0.0396818	FOXO1	1
BP	GO:0006094	gluconeogenesis	1/11	89/18670	0.0512183	0.08863	0.0400058	FOXO1	1
BP	GO:0042475	odontogenesis of dentin-containing tooth	1/11	90/18670	0.05178	0.089343	0.0403276	FOXO1	1
BP	GO:0030510	regulation of BMP signaling pathway	1/11	91/18670	0.0523414	0.0900513	0.0406473	TOB1	1
BP	GO:0019319	hexose biosynthetic process	1/11	92/18670	0.0529025	0.0907551	0.040965	FOXO1	1
BP	GO:0007589	body fluid secretion	1/11	93/18670	0.0534632	0.091193	0.0411627	SOCS2	1
BP	GO:1901655	cellular response to ketone	1/11	93/18670	0.0534632	0.091193	0.0411627	FOXO1	1
BP	GO:0042116	macrophage activation	1/11	95/18670	0.0545839	0.0928392	0.0419058	LDLR	1
BP	GO:0006835	dicarboxylic acid transport	1/11	96/18670	0.0551437	0.0932601	0.0420957	SLC1A1	1
BP	GO:0097327	response to antineoplastic agent	1/11	96/18670	0.0551437	0.0932601	0.0420957	FOXO1	1
BP	GO:0120162	positive regulation of cold-induced thermogenesis	1/11	97/18670	0.0557033	0.0939403	0.0424028	GADD45G	1
BP	GO:0046364	monosaccharide biosynthetic process	1/11	98/18670	0.0562626	0.0943505	0.0425879	FOXO1	1
BP	GO:0060191	regulation of lipase activity	1/11	98/18670	0.0562626	0.0943505	0.0425879	APOA5	1
BP	GO:0019395	fatty acid oxidation	1/11	99/18670	0.0568215	0.0944915	0.0426516	IRS1	1
BP	GO:0070301	cellular response to hydrogen peroxide	1/11	99/18670	0.0568215	0.0944915	0.0426516	FOXO1	1
BP	GO:1901570	fatty acid derivative biosynthetic process	1/11	99/18670	0.0568215	0.0944915	0.0426516	CYP2C8	1
BP	GO:0060840	artery development	1/11	100/18670	0.0573802	0.0951555	0.0429513	LDLR	1
BP	GO:0002027	regulation of heart rate	1/11	101/18670	0.0579386	0.0955506	0.0431296	SLC1A1	1
BP	GO:0034440	lipid oxidation	1/11	101/18670	0.0579386	0.0955506	0.0431296	IRS1	1
BP	GO:0044264	cellular polysaccharide metabolic process	1/11	103/18670	0.0590544	0.0968557	0.0437187	IRS1	1
BP	GO:0048259	regulation of receptor-mediated endocytosis	1/11	103/18670	0.0590544	0.0968557	0.0437187	APOA5	1
BP	GO:0001523	retinoid metabolic process	1/11	104/18670	0.0596119	0.0972357	0.0438902	CYP2C8	1
BP	GO:0071887	leukocyte apoptotic process	1/11	104/18670	0.0596119	0.0972357	0.0438902	TSC22D3	1
BP	GO:0003300	cardiac muscle hypertrophy	1/11	106/18670	0.0607259	0.098783	0.0445886	FOXO1	1
BP	GO:0043502	regulation of muscle adaptation	1/11	107/18670	0.0612825	0.0994175	0.044875	FOXO1	1
BP	GO:0006821	chloride transport	1/11	108/18670	0.0618387	0.0995087	0.0449162	SLC1A1	1
BP	GO:0009062	fatty acid catabolic process	1/11	108/18670	0.0618387	0.0995087	0.0449162	IRS1	1
BP	GO:1904659	glucose transmembrane transport	1/11	108/18670	0.0618387	0.0995087	0.0449162	IRS1	1
BP	GO:0001676	long-chain fatty acid metabolic process	1/11	109/18670	0.0623947	0.0998649	0.045077	CYP2C8	1
BP	GO:0014897	striated muscle hypertrophy	1/11	109/18670	0.0623947	0.0998649	0.045077	FOXO1	1
BP	GO:0016101	diterpenoid metabolic process	1/11	110/18670	0.0629503	0.0999504	0.0451156	CYP2C8	1
BP	GO:0033559	unsaturated fatty acid metabolic process	1/11	110/18670	0.0629503	0.0999504	0.0451156	CYP2C8	1
BP	GO:0098739	import across plasma membrane	1/11	110/18670	0.0629503	0.0999504	0.0451156	SLC1A1	1
CC	GO:0034358	plasma lipoprotein particle	2/11	37/19717	0.000186458	0.00310994	0.00174593	LDLR/APOA5	2
CC	GO:1990777	lipoprotein particle	2/11	37/19717	0.000186458	0.00310994	0.00174593	LDLR/APOA5	2
CC	GO:0032994	protein-lipid complex	2/11	39/19717	0.000207329	0.00310994	0.00174593	LDLR/APOA5	2
CC	GO:0042627	chylomicron	1/11	13/19717	0.00723059	0.0454265	0.0255026	APOA5	1
CC	GO:0034362	low-density lipoprotein particle	1/11	14/19717	0.00778482	0.0454265	0.0255026	LDLR	1
CC	GO:0036020	endolysosome membrane	1/11	14/19717	0.00778482	0.0454265	0.0255026	LDLR	1
CC	GO:0061695	transferase complex, transferring phosphorus-containing groups	2/11	259/19717	0.00874282	0.0454265	0.0255026	IRS1/SOCS2	2
CC	GO:0030014	CCR4-NOT complex	1/11	17/19717	0.00944581	0.0454265	0.0255026	TOB1	1
CC	GO:0034361	very-low-density lipoprotein particle	1/11	20/19717	0.0111043	0.0454265	0.0255026	APOA5	1
CC	GO:0034385	triglyceride-rich plasma lipoprotein particle	1/11	20/19717	0.0111043	0.0454265	0.0255026	APOA5	1
CC	GO:0036019	endolysosome	1/11	20/19717	0.0111043	0.0454265	0.0255026	LDLR	1
CC	GO:0034364	high-density lipoprotein particle	1/11	26/19717	0.0144136	0.0499671	0.0280517	APOA5	1
CC	GO:0005942	phosphatidylinositol 3-kinase complex	1/11	27/19717	0.0149642	0.0499671	0.0280517	SOCS2	1
CC	GO:0005769	early endosome	2/11	350/19717	0.0155453	0.0499671	0.0280517	LDLR/SLC1A1	2
CC	GO:0045177	apical part of cell	2/11	384/19717	0.0185244	0.0555731	0.0311989	LDLR/SLC1A1	2
CC	GO:0030669	clathrin-coated endocytic vesicle membrane	1/11	44/19717	0.0242814	0.0682913	0.038339	LDLR	1
CC	GO:0010008	endosome membrane	2/11	479/19717	0.0280173	0.0741634	0.0416356	LDLR/SLC1A1	2
CC	GO:0045334	clathrin-coated endocytic vesicle	1/11	63/19717	0.0345998	0.0864995	0.0485611	LDLR	1
CC	GO:0005905	clathrin-coated pit	1/11	69/19717	0.0378376	0.0896153	0.0503104	LDLR	1
CC	GO:0005901	caveola	1/11	80/19717	0.0437479	0.0948933	0.0532735	IRS1	1
CC	GO:0055038	recycling endosome membrane	1/11	81/19717	0.0442836	0.0948933	0.0532735	SLC1A1	1
MF	GO:0005070	SH3/SH2 adaptor activity	3/11	52/17697	3.88312e-06	0.000438793	0.000159412	IRS1/SOCS2/TOB1	3
MF	GO:0035591	signaling adaptor activity	3/11	80/17697	1.42994e-05	0.000807918	0.000293515	IRS1/SOCS2/TOB1	3
MF	GO:0005159	insulin-like growth factor receptor binding	2/11	16/17697	4.19505e-05	0.00158014	0.00057406	IRS1/SOCS2	2
MF	GO:0030674	protein binding, bridging	3/11	170/17697	0.000135787	0.003836	0.00139361	IRS1/SOCS2/TOB1	3
MF	GO:0060090	molecular adaptor activity	3/11	237/17697	0.000361435	0.00816843	0.00296757	IRS1/SOCS2/TOB1	3
MF	GO:0030971	receptor tyrosine kinase binding	2/11	69/17697	0.000805523	0.0151707	0.00551147	IRS1/TOB1	2
MF	GO:0015238	drug transmembrane transporter activity	2/11	92/17697	0.00142614	0.02058	0.00747665	SLC1A1/SLC25A25	2
MF	GO:1990782	protein tyrosine kinase binding	2/11	93/17697	0.00145699	0.02058	0.00747665	IRS1/TOB1	2
MF	GO:0005347	ATP transmembrane transporter activity	1/11	10/17697	0.00619996	0.0414923	0.015074	SLC25A25	1
MF	GO:0016595	glutamate binding	1/11	10/17697	0.00619996	0.0414923	0.015074	SLC1A1	1
MF	GO:0008514	organic anion transmembrane transporter activity	2/11	211/17697	0.00724951	0.0414923	0.015074	SLC1A1/SLC25A25	2
MF	GO:0005041	low-density lipoprotein particle receptor activity	1/11	12/17697	0.00743575	0.0414923	0.015074	LDLR	1
MF	GO:0005068	transmembrane receptor protein tyrosine kinase adaptor activity	1/11	13/17697	0.00805312	0.0414923	0.015074	IRS1	1
MF	GO:0016725	oxidoreductase activity, acting on CH or CH2 groups	1/11	13/17697	0.00805312	0.0414923	0.015074	CYP2C8	1
MF	GO:0000295	adenine nucleotide transmembrane transporter activity	1/11	14/17697	0.00867014	0.0414923	0.015074	SLC25A25	1
MF	GO:0005283	amino acid:sodium symporter activity	1/11	14/17697	0.00867014	0.0414923	0.015074	SLC1A1	1
MF	GO:0005313	L-glutamate transmembrane transporter activity	1/11	14/17697	0.00867014	0.0414923	0.015074	SLC1A1	1
MF	GO:0005346	purine ribonucleotide transmembrane transporter activity	1/11	14/17697	0.00867014	0.0414923	0.015074	SLC25A25	1
MF	GO:0015172	acidic amino acid transmembrane transporter activity	1/11	14/17697	0.00867014	0.0414923	0.015074	SLC1A1	1
MF	GO:0046935	1-phosphatidylinositol-3-kinase regulator activity	1/11	14/17697	0.00867014	0.0414923	0.015074	SOCS2	1
MF	GO:0060229	lipase activator activity	1/11	14/17697	0.00867014	0.0414923	0.015074	APOA5	1
MF	GO:0015216	purine nucleotide transmembrane transporter activity	1/11	15/17697	0.00928681	0.0414923	0.015074	SLC25A25	1
MF	GO:0030228	lipoprotein particle receptor activity	1/11	15/17697	0.00928681	0.0414923	0.015074	LDLR	1
MF	GO:0008392	arachidonic acid epoxygenase activity	1/11	16/17697	0.00990314	0.0414923	0.015074	CYP2C8	1
MF	GO:0030169	low-density lipoprotein particle binding	1/11	16/17697	0.00990314	0.0414923	0.015074	LDLR	1
MF	GO:0008391	arachidonic acid monooxygenase activity	1/11	17/17697	0.0105191	0.0414923	0.015074	CYP2C8	1
MF	GO:0035014	phosphatidylinositol 3-kinase regulator activity	1/11	17/17697	0.0105191	0.0414923	0.015074	SOCS2	1
MF	GO:0005416	amino acid:cation symporter activity	1/11	18/17697	0.0111347	0.0414923	0.015074	SLC1A1	1
MF	GO:0017127	cholesterol transporter activity	1/11	18/17697	0.0111347	0.0414923	0.015074	APOA5	1
MF	GO:0120020	intermembrane cholesterol transfer activity	1/11	18/17697	0.0111347	0.0414923	0.015074	APOA5	1
MF	GO:0015215	nucleotide transmembrane transporter activity	1/11	19/17697	0.01175	0.0414923	0.015074	SLC25A25	1
MF	GO:0120015	intermembrane sterol transfer activity	1/11	19/17697	0.01175	0.0414923	0.015074	APOA5	1
MF	GO:0050750	low-density lipoprotein particle receptor binding	1/11	21/17697	0.0129795	0.0444451	0.0161468	APOA5	1
MF	GO:0005158	insulin receptor binding	1/11	22/17697	0.0135938	0.0451151	0.0163902	IRS1	1
MF	GO:0001223	transcription coactivator binding	1/11	23/17697	0.0142077	0.0451151	0.0163902	FOXO1	1
MF	GO:0120013	intermembrane lipid transfer activity	1/11	24/17697	0.0148212	0.0451151	0.0163902	APOA5	1
MF	GO:0005328	neurotransmitter:sodium symporter activity	1/11	26/17697	0.0160472	0.0451151	0.0163902	SLC1A1	1
MF	GO:0070325	lipoprotein particle receptor binding	1/11	26/17697	0.0160472	0.0451151	0.0163902	APOA5	1
MF	GO:0015605	organophosphate ester transmembrane transporter activity	1/11	27/17697	0.0166597	0.0451151	0.0163902	SLC25A25	1
MF	GO:0031210	phosphatidylcholine binding	1/11	27/17697	0.0166597	0.0451151	0.0163902	APOA5	1
MF	GO:0050997	quaternary ammonium group binding	1/11	27/17697	0.0166597	0.0451151	0.0163902	APOA5	1
MF	GO:0008509	anion transmembrane transporter activity	2/11	327/17697	0.0167684	0.0451151	0.0163902	SLC1A1/SLC25A25	2
MF	GO:0005343	organic acid:sodium symporter activity	1/11	28/17697	0.0172719	0.0453889	0.0164897	SLC1A1	1
MF	GO:0043548	phosphatidylinositol 3-kinase binding	1/11	30/17697	0.0184952	0.0459401	0.0166899	IRS1	1
MF	GO:0015175	neutral amino acid transmembrane transporter activity	1/11	31/17697	0.0191063	0.0459401	0.0166899	SLC1A1	1
MF	GO:0015248	sterol transporter activity	1/11	31/17697	0.0191063	0.0459401	0.0166899	APOA5	1
MF	GO:0016712	oxidoreductase activity, acting on paired donors, with incorporation or reduction of molecular oxygen, reduced flavin or flavoprotein as one donor, and incorporation of one atom of oxygen	1/11	32/17697	0.019717	0.0459401	0.0166899	CYP2C8	1
MF	GO:0051721	protein phosphatase 2A binding	1/11	32/17697	0.019717	0.0459401	0.0166899	FOXO1	1
MF	GO:0071813	lipoprotein particle binding	1/11	33/17697	0.0203275	0.0459401	0.0166899	LDLR	1
MF	GO:0071814	protein-lipid complex binding	1/11	33/17697	0.0203275	0.0459401	0.0166899	LDLR	1
MF	GO:1901682	sulfur compound transmembrane transporter activity	1/11	35/17697	0.0215473	0.047742	0.0173446	SLC1A1	1
MF	GO:0042169	SH2 domain binding	1/11	36/17697	0.0221567	0.0481481	0.0174921	IRS1	1
MF	GO:0008395	steroid hydroxylase activity	1/11	38/17697	0.0233744	0.049836	0.0181053	CYP2C8	1
MF	GO:0005310	dicarboxylic acid transmembrane transporter activity	1/11	39/17697	0.0239827	0.0501861	0.0182325	SLC1A1	1
MF	GO:0001784	phosphotyrosine residue binding	1/11	40/17697	0.0245908	0.0505228	0.0183548	IRS1	1
MF	GO:0001221	transcription cofactor binding	1/11	43/17697	0.0264127	0.052362	0.019023	FOXO1	1
MF	GO:0015932	nucleobase-containing compound transmembrane transporter activity	1/11	43/17697	0.0264127	0.052362	0.019023	SLC25A25	1
MF	GO:1901505	carbohydrate derivative transmembrane transporter activity	1/11	44/17697	0.0270193	0.0526411	0.0191244	SLC25A25	1
MF	GO:0015485	cholesterol binding	1/11	49/17697	0.0300473	0.0575483	0.0209072	APOA5	1
MF	GO:0005326	neurotransmitter transporter activity	1/11	51/17697	0.0312561	0.0579007	0.0210352	SLC1A1	1
MF	GO:0045309	protein phosphorylated amino acid binding	1/11	51/17697	0.0312561	0.0579007	0.0210352	IRS1	1
MF	GO:0005080	protein kinase C binding	1/11	53/17697	0.0324636	0.0591675	0.0214954	IRS1	1
MF	GO:0015179	L-amino acid transmembrane transporter activity	1/11	54/17697	0.0330668	0.0593102	0.0215473	SLC1A1	1
MF	GO:0032934	sterol binding	1/11	56/17697	0.0342722	0.0605118	0.0219838	APOA5	1
MF	GO:0030276	clathrin binding	1/11	57/17697	0.0348743	0.0606277	0.0220259	LDLR	1
MF	GO:0016597	amino acid binding	1/11	59/17697	0.0360777	0.0617693	0.0224407	SLC1A1	1
MF	GO:0015370	solute:sodium symporter activity	1/11	72/17697	0.0438661	0.0726627	0.0263982	SLC1A1	1
MF	GO:0001618	virus receptor activity	1/11	74/17697	0.0450593	0.0726627	0.0263982	LDLR	1
MF	GO:0015171	amino acid transmembrane transporter activity	1/11	74/17697	0.0450593	0.0726627	0.0263982	SLC1A1	1
MF	GO:0104005	hijacked molecular function	1/11	74/17697	0.0450593	0.0726627	0.0263982	LDLR	1
MF	GO:0070405	ammonium ion binding	1/11	75/17697	0.0456553	0.0726627	0.0263982	APOA5	1
MF	GO:0001540	amyloid-beta binding	1/11	78/17697	0.0474415	0.0744567	0.02705	LDLR	1
MF	GO:0046332	SMAD binding	1/11	80/17697	0.0486305	0.0752774	0.0273481	TOB1	1
MF	GO:0008013	beta-catenin binding	1/11	82/17697	0.0498183	0.0757208	0.0275092	FOXO1	1
MF	GO:0051219	phosphoprotein binding	1/11	83/17697	0.0504116	0.0757208	0.0275092	IRS1	1
MF	GO:0038024	cargo receptor activity	1/11	85/17697	0.0515973	0.0757208	0.0275092	LDLR	1
MF	GO:0043178	alcohol binding	1/11	85/17697	0.0515973	0.0757208	0.0275092	APOA5	1
MF	GO:0005496	steroid binding	1/11	95/17697	0.0575057	0.0833095	0.0302662	APOA5	1
MF	GO:0004497	monooxygenase activity	1/11	99/17697	0.0598597	0.0853818	0.031019	CYP2C8	1
MF	GO:0015108	chloride transmembrane transporter activity	1/11	100/17697	0.0604473	0.0853818	0.031019	SLC1A1	1
MF	GO:0015294	solute:cation symporter activity	1/11	102/17697	0.0616216	0.085966	0.0312312	SLC1A1	1
KEGG	hsa04068	FoxO signaling pathway	3/9	131/8076	0.000326242	0.0126573	0.0107764	FOXO1/IRS1/GADD45G	3
KEGG	hsa04910	Insulin signaling pathway	3/9	137/8076	0.000372275	0.0126573	0.0107764	FOXO1/IRS1/SOCS2	3
KEGG	hsa04930	Type II diabetes mellitus	2/9	46/8076	0.00111399	0.0252504	0.0214981	IRS1/SOCS2	2
KEGG	hsa04213	Longevity regulating pathway - multiple species	2/9	62/8076	0.00201656	0.0342815	0.029187	FOXO1/IRS1	2
KEGG	hsa04211	Longevity regulating pathway	2/9	89/8076	0.00411124	0.0559129	0.0476038	FOXO1/IRS1	2
KEGG	hsa04931	Insulin resistance	2/9	108/8076	0.00599968	0.0625818	0.0532817	FOXO1/IRS1	2
KEGG	hsa04935	Growth hormone synthesis, secretion and action	2/9	119/8076	0.00724405	0.0625818	0.0532817	IRS1/SOCS2	2
KEGG	hsa04152	AMPK signaling pathway	2/9	120/8076	0.00736257	0.0625818	0.0532817	FOXO1/IRS1	2
KEGG	hsa04218	Cellular senescence	2/9	156/8076	0.0122094	0.0922489	0.0785401	FOXO1/GADD45G	2

## Sheet: darkgreen enrich
Enrichment result of signature genes in darkgreen module
ONTOLOGY	ID	Description	GeneRatio	BgRatio	pvalue	p.adjust	qvalue	geneID	Count
CC	GO:0072562	blood microparticle	4/20	147/19717	1.30943e-05	0.000759469	0.000565122	AFM/ALB/HPX/ORM2	4
CC	GO:0031093	platelet alpha granule lumen	2/20	67/19717	0.00207753	0.0536177	0.039897	ALB/ORM2	2
CC	GO:0031091	platelet alpha granule	2/20	91/19717	0.00379214	0.0536177	0.039897	ALB/ORM2	2
CC	GO:0060205	cytoplasmic vesicle lumen	3/20	338/19717	0.00458427	0.0536177	0.039897	ALB/HPX/ORM2	3
CC	GO:0031983	vesicle lumen	3/20	339/19717	0.00462222	0.0536177	0.039897	ALB/HPX/ORM2	3

## Sheet: red enrich
Enrichment result of signature genes in red module
ONTOLOGY	ID	Description	GeneRatio	BgRatio	pvalue	p.adjust	qvalue	geneID	Count
BP	GO:0044282	small molecule catabolic process	6/31	445/18670	7.86891e-05	0.0371227	0.0279555	ADH4/ALDOB/CDA/HDC/ACAA2/UPP2	6
BP	GO:0008655	pyrimidine-containing compound salvage	2/31	11/18670	0.000145389	0.0371227	0.0279555	CDA/UPP2	2
BP	GO:0043097	pyrimidine nucleoside salvage	2/31	11/18670	0.000145389	0.0371227	0.0279555	CDA/UPP2	2
BP	GO:0008202	steroid metabolic process	5/31	331/18670	0.000197671	0.037854	0.0285062	ESR1/HMGCS2/UGT2B15/RDH16/ACAA2	5
BP	GO:0043174	nucleoside salvage	2/31	16/18670	0.000315575	0.0483461	0.0364074	CDA/UPP2	2
BP	GO:0046135	pyrimidine nucleoside catabolic process	2/31	24/18670	0.00071984	0.0795768	0.0599259	CDA/UPP2	2
BP	GO:0006721	terpenoid metabolic process	3/31	120/18670	0.00102069	0.0795768	0.0599259	ADH4/HMGCS2/RDH16	3
BP	GO:0046134	pyrimidine nucleoside biosynthetic process	2/31	29/18670	0.00105343	0.0795768	0.0599259	CDA/UPP2	2
BP	GO:0006639	acylglycerol metabolic process	3/31	129/18670	0.00125749	0.0795768	0.0599259	ANG/ACSL1/LIPG	3
BP	GO:0034754	cellular hormone metabolic process	3/31	129/18670	0.00125749	0.0795768	0.0599259	ADH4/ESR1/RDH16	3
BP	GO:0006638	neutral lipid metabolic process	3/31	130/18670	0.00128575	0.0795768	0.0599259	ANG/ACSL1/LIPG	3
BP	GO:0009164	nucleoside catabolic process	2/31	34/18670	0.00144811	0.0795768	0.0599259	CDA/UPP2	2
BP	GO:0043094	cellular metabolic compound salvage	2/31	34/18670	0.00144811	0.0795768	0.0599259	CDA/UPP2	2
BP	GO:0046131	pyrimidine ribonucleoside metabolic process	2/31	35/18670	0.00153428	0.0795768	0.0599259	CDA/UPP2	2
BP	GO:0006720	isoprenoid metabolic process	3/31	139/18670	0.00155829	0.0795768	0.0599259	ADH4/HMGCS2/RDH16	3
BP	GO:0072529	pyrimidine-containing compound catabolic process	2/31	39/18670	0.00190289	0.0804071	0.0605512	CDA/UPP2	2
BP	GO:0042572	retinol metabolic process	2/31	41/18670	0.00210141	0.0804071	0.0605512	ADH4/RDH16	2
BP	GO:0009163	nucleoside biosynthetic process	2/31	43/18670	0.00230934	0.0804071	0.0605512	CDA/UPP2	2
BP	GO:0010863	positive regulation of phospholipase C activity	2/31	43/18670	0.00230934	0.0804071	0.0605512	ANG/ESR1	2
BP	GO:0046460	neutral lipid biosynthetic process	2/31	43/18670	0.00230934	0.0804071	0.0605512	ANG/ACSL1	2
BP	GO:0046463	acylglycerol biosynthetic process	2/31	43/18670	0.00230934	0.0804071	0.0605512	ANG/ACSL1	2
BP	GO:1901658	glycosyl compound catabolic process	2/31	43/18670	0.00230934	0.0804071	0.0605512	CDA/UPP2	2
BP	GO:1900274	regulation of phospholipase C activity	2/31	45/18670	0.00252662	0.0841473	0.0633677	ANG/ESR1	2
BP	GO:1901659	glycosyl compound biosynthetic process	2/31	47/18670	0.00275317	0.087872	0.0661727	CDA/UPP2	2
BP	GO:0006066	alcohol metabolic process	4/31	364/18670	0.00294973	0.0903798	0.0680612	ADH4/HMGCS2/RDH16/ACAA2	4
BP	GO:0034656	nucleobase-containing small molecule catabolic process	2/31	50/18670	0.00311028	0.0916336	0.0690054	CDA/UPP2	2
BP	GO:0006213	pyrimidine nucleoside metabolic process	2/31	51/18670	0.00323389	0.0917467	0.0690905	CDA/UPP2	2
BP	GO:0001541	ovarian follicle development	2/31	55/18670	0.00375102	0.0994185	0.0748679	ANG/ESR1	2
BP	GO:0072528	pyrimidine-containing compound biosynthetic process	2/31	56/18670	0.00388594	0.0994185	0.0748679	CDA/UPP2	2
BP	GO:1901136	carbohydrate derivative catabolic process	3/31	192/18670	0.00389368	0.0994185	0.0748679	CDA/FBXO2/UPP2	3
MF	GO:0004745	retinol dehydrogenase activity	2/29	20/17697	0.000483709	0.0545344	0.0404723	ADH4/RDH16	2
MF	GO:0016616	oxidoreductase activity, acting on the CH-OH group of donors, NAD or NADP as acceptor	3/29	119/17697	0.000953458	0.0545344	0.0404723	ADH4/RDH16/ABCC4	3
MF	GO:0016614	oxidoreductase activity, acting on CH-OH group of donors	3/29	128/17697	0.001177	0.0545344	0.0404723	ADH4/RDH16/ABCC4	3
MF	GO:0008201	heparin binding	3/29	169/17697	0.0026047	0.0874425	0.0648948	ANG/LIPG/GREM2	3
MF	GO:0016830	carbon-carbon lyase activity	2/29	51/17697	0.00314541	0.0874425	0.0648948	ALDOB/HDC	2
KEGG	hsa00071	Fatty acid degradation	3/23	44/8076	0.000247664	0.0222898	0.0198132	ADH4/ACSL1/ACAA2	3
KEGG	hsa00830	Retinol metabolism	3/23	68/8076	0.000896322	0.0311792	0.0277148	ADH4/UGT2B15/RDH16	3
KEGG	hsa03320	PPAR signaling pathway	3/23	78/8076	0.00133559	0.0311792	0.0277148	ACSL1/HMGCS2/PLIN4	3
KEGG	hsa00983	Drug metabolism - other enzymes	3/23	79/8076	0.00138574	0.0311792	0.0277148	CDA/UGT2B15/UPP2	3
